# Supplementary material for: Epigenome-wide DNA Methylation Association Study of CHIP Provides Insight into Perturbed Gene Regulation
Source: Research Square preprint supplement (doi:10.21203/rs.3.rs-4656898/v1), 2024-07-16
Supplement: Supplementary file 1 [file 01730d50e28f83f49d622a05.xlsx]

## Sheet: Supplementary Table 1
CpG	beta.chs	se.chs	p.chs	nCase.chs	N.chs	beta.aric	se.aric	p.aric	df.aric	beta.jhs	se.jhs	p.jhs	nCase.jhs	se.adj.jhs	p.adj.jhs	all.TE.fixed	all.seTE.fixed	all.zval.fixed	all.pval.fixed	all.I2	all.Q	all.heterogeneity.p	FDR.fixed	Genome_Build	CHR	MAPINFO	Chromosome_36	Coordinate_36	Strand	Probe_SNPs	Probe_SNPs_10	Random_Loci	Methyl27_Loci	UCSC_RefGene_Name	UCSC_RefGene_Accession	UCSC_RefGene_Group	UCSC_CpG_Islands_Name	Relation_to_UCSC_CpG_Island	Phantom	DMR	Enhancer	HMM_Island	Regulatory_Feature_Name	Regulatory_Feature_Group	DHS
cg23014425	-0.0231986	0.00394862	1.21367e-08	62	455	-0.0169848	0.00119022	6.73701e-44	1840	-0.0204799	0.00203641	3.70966e-23	68	0.00235732	0	-0.0180664	0.00102598	-17.6088	2.10715e-69	0.168357	0.00235732	0	9.40051e-64	37	17	46648525	17	44003524	F			NA	NA	HOXB3	NM_002146	5'UTR					NA	17:44003491-44003615			NA
cg04800503	-0.04655	0.00694384	1.14203e-10	62	455	-0.0378169	0.00261074	4.13488e-45	1840	-0.0240863	0.00254661	9.93458e-21	68	0.00294791	3.33067e-16	-0.0328656	0.00188135	-17.4691	2.4633e-68	0.000281638	0.00294791	3.33067e-16	5.49471e-63	37	17	46648533	17	44003532	F			NA	NA	HOXB3	NM_002146	5'UTR					NA	17:44003491-44003615			NA
cg25113462	-0.030102	0.00400696	8.09941e-13	62	455	-0.0427924	0.00297088	1.1912e-44	1840	-0.0181363	0.0020234	8.03793e-19	68	0.00234225	9.65894e-15	-0.0280251	0.00167164	-16.765	4.40016e-63	5.07969e-10	0.00234225	9.65894e-15	6.54341e-58	37	2	239299293	2	238964032	F			NA	NA	TRAF3IP1;TRAF3IP1	NM_015650;NM_001139490	Body;Body					TRUE				NA
cg07727170	-0.013293	0.00244123	1.14442e-07	62	455	-0.0260385	0.00161447	7.75097e-55	1840	-0.010197	0.00162653	4.58304e-10	68	0.00188285	6.10328e-08	-0.0181118	0.00109532	-16.5356	2.03239e-61	1.20862e-10	0.00188285	6.10328e-08	2.26675e-56	37	15	70458214	15	68245268	F			NA	NA								TRUE				NA
cg01966117	-0.0454394	0.00744135	3.44924e-09	62	455	-0.046883	0.00423786	1.37701e-27	1840	-0.0408676	0.00365106	4.04748e-28	68	0.0042264	0	-0.044086	0.00277646	-15.8785	8.92687e-57	0.591983	0.0042264	0	7.965e-52	37	3	52528714	3	52503754	F			NA	NA	STAB1	NM_015136	TSS1500					TRUE				TRUE
cg03785076	-0.0426878	0.0070592	4.77633e-09	62	455	-0.0506921	0.00465034	7.42347e-27	1840	-0.0385959	0.00412774	2.63342e-20	68	0.0047782	6.66134e-16	-0.0444216	0.00301363	-14.7402	3.55472e-49	0.185908	0.0047782	6.66134e-16	2.64308e-44	37	2	241936915	2	241585588	R			NA	NA	SNED1	NM_001080437	TSS1500	chr2:241937716-241938468	N_Shore			TRUE				NA
cg00646731	-0.0115617	0.00365248	0.00172196	62	455	-0.0230955	0.00186935	9.59177e-34	1840	-0.0156292	0.00180516	1.08736e-17	68	0.00208963	7.4607e-14	-0.0187331	0.00130173	-14.3909	5.9047e-47	0.00317102	0.00208963	7.4607e-14	3.76319e-42	37	17	46668733	17	44023732	R			NA	NA	LOC404266;HOXB5;LOC404266;LOC404266;LOC404266	NR_033203;NM_002147;NR_033201;NR_033204;NR_033202	TSS1500;3'UTR;Body;TSS1500;Body	chr17:46669434-46669811	N_Shore		RDMR	NA				NA
cg23551720	-0.0213777	0.00391164	1.03421e-07	62	455	-0.0360975	0.00318246	7.15784e-29	1840	-0.0267089	0.00308081	9.8821e-18	68	0.00356629	6.92779e-14	-0.0290926	0.00202978	-14.3329	1.36368e-46	0.0101451	0.00356629	6.92779e-14	7.60462e-42	37	17	46633726	17	43988725	F			NA	NA	HOXB3	NM_002146	5'UTR	chr17:46631800-46632212	S_Shore			TRUE		17:46633593-46634072	Unclassified_Cell_type_specific	NA
cg16937168	-0.0402966	0.00714091	4.13906e-08	62	455	-0.0626042	0.00567359	1.85581e-27	1840	-0.0464983	0.0054918	5.33761e-17	68	0.00635722	2.58793e-13	-0.0515198	0.00364129	-14.1488	1.90065e-45	0.0315716	0.00635722	2.58793e-13	9.42143e-41	37	2	241936844	2	241585517	F			NA	NA	SNED1	NM_001080437	TSS1500	chr2:241937716-241938468	N_Shore			TRUE				NA
cg10717869	-0.0325345	0.00521277	1.62876e-09	62	455	-0.0390296	0.00439343	1.50449e-18	1840	-0.0348634	0.00347533	4.72061e-23	68	0.00402298	0	-0.0357287	0.00257858	-13.8559	1.17122e-43	0.610715	0.00402298	0	5.22512e-39	37	1	205780912	1	204047535	R			NA	NA	SLC41A1	NM_173854	5'UTR	chr1:205781870-205783010	N_Shore		RDMR	NA				NA
cg02836478	-0.0265132	0.00553932	2.7716e-06	62	455	-0.0434508	0.0039312	1.52991e-27	1840	-0.0349186	0.00420119	1.8978e-16	68	0.00486323	6.96554e-13	-0.0369114	0.00267665	-13.7902	2.92e-43	0.0395822	0.00486323	6.96554e-13	1.18426e-38	37	17	46652501	17	44007500	R			NA	NA	HOXB3	NM_002146	TSS1500	chr17:46654053-46654369	N_Shore			NA				NA
cg01521274	-0.0209254	0.00433727	2.32406e-06	62	455	-0.0295482	0.00308113	2.74322e-21	1840	-0.0305775	0.00308239	1.36586e-22	68	0.00356812	0	-0.0279556	0.00205395	-13.6107	3.46099e-42	0.179569	0.00356812	0	1.2867e-37	37	14	71822452	14	70892205	F			NA	NA								TRUE				NA
cg09749364	-0.0258375	0.00553098	4.67862e-06	62	455	-0.0422785	0.00399133	1.71931e-25	1840	-0.0366785	0.00440534	1.68951e-16	68	0.00509955	6.36158e-13	-0.0366572	0.00273267	-13.4144	4.97756e-41	0.0547409	0.00509955	6.36158e-13	1.70816e-36	37	15	40384779	15	38172071	R	rs80056127		NA	NA	BMF;BMF;BMF;BMF	NM_033503;NM_001003940;NM_001003943;NM_001003942	Body;Body;Body;Body					TRUE				TRUE
cg06186155	-0.0192064	0.00412059	4.90162e-06	62	455	-0.0233475	0.00209908	7.35522e-28	1840	-0.0147189	0.00201573	4.3216e-13	68	0.00233338	2.82684e-10	-0.0194527	0.0014594	-13.3293	1.56433e-40	0.0227997	0.00233338	2.82684e-10	4.98489e-36	37	17	46648582	17	44003581	F			NA	NA	HOXB3	NM_002146	5'UTR					NA	17:44003491-44003615			NA
cg22506548	-0.0618307	0.0108472	3.07135e-08	62	455	-0.03827	0.00336314	4.83885e-29	1840	-0.0245931	0.00406706	1.80885e-09	68	0.00470797	1.75374e-07	-0.0353353	0.00265348	-13.3166	1.85357e-40	0.00256197	0.00470797	1.75374e-07	5.42629e-36	37	1	2996949	1	2986809	R			NA	NA	PRDM16;PRDM16	NM_022114;NM_199454	Body;Body	chr1:2997272-2997473	N_Shore			NA	1:2986743-2986821			NA
cg23146197	-0.0308417	0.00516442	7.19674e-09	62	455	-0.040815	0.00390925	7.86941e-25	1840	-0.0235876	0.00310363	4.8472e-14	68	0.00359271	5.18972e-11	-0.0313439	0.00235439	-13.313	1.94611e-40	0.00514365	0.00359271	5.18972e-11	5.42629e-36	37	12	66271002	12	64557269	F			NA	NA	HMGA2;HMGA2	NM_003484;NM_003483	Body;Body					TRUE				NA
cg15059065	-0.0361535	0.0106147	0.000757324	62	455	-0.0489977	0.00446536	3.51839e-27	1840	-0.0417599	0.00548363	4.32009e-14	68	0.00634776	4.74639e-11	-0.0454958	0.00345352	-13.1737	1.24296e-39	0.41978	0.00634776	4.74639e-11	3.26185e-35	37	19	17354961	19	17215961	F			NA	NA	NR2F6	NM_005234	Body	chr19:17355181-17356471	N_Shore		DMR	NA	19:17215806-17218642			NA
cg13545717	-0.030837	0.0046809	2.25122e-10	62	455	-0.0341997	0.00416708	4.20995e-16	1840	-0.0337667	0.00369512	1.74268e-19	68	0.00427741	2.88658e-15	-0.0330778	0.0025167	-13.1433	1.85867e-39	0.848914	0.00427741	2.88658e-15	4.60667e-35	37	9	126585875	9	125625696	F			TRUE	NA	DENND1A;DENND1A	NM_024820;NM_020946	Body;Body					NA				NA
cg24400630	-0.0277719	0.00723634	0.000153929	62	455	-0.044066	0.00407836	1.99054e-26	1840	-0.0340834	0.00444311	2.84286e-14	68	0.00514327	3.43054e-11	-0.0381821	0.00292327	-13.0615	5.4666e-39	0.0913518	0.00514327	3.43054e-11	1.28357e-34	37	1	89728035	1	89500623	R			NA	NA	GBP5;GBP5	NM_001134486;NM_052942	Body;Body					TRUE				NA
cg10020890	-0.0280248	0.00548703	6.09745e-07	62	455	-0.039919	0.0040283	1.37493e-22	1840	-0.0307972	0.00398554	1.85897e-14	68	0.0046136	2.46704e-11	-0.0341116	0.00265541	-12.8461	9.04688e-38	0.147708	0.0046136	2.46704e-11	2.01802e-33	37	16	75025753	16	73583254	R			NA	NA								TRUE				NA
cg21517792	-0.0140269	0.00514995	0.00686744	62	455	-0.027231	0.00270261	2.80281e-23	1840	-0.0284267	0.00321128	2.0948e-18	68	0.00371733	2.05391e-14	-0.0255656	0.00201219	-12.7054	5.5219e-37	0.049982	0.00371733	2.05391e-14	1.17307e-32	37	14	105885531	14	104956576	R			NA	NA	MTA1	NM_004689	TSS1500	chr14:105881312-105881747	S_Shelf			NA				NA
cg22012981	-0.0248701	0.00532167	4.63748e-06	62	455	-0.036158	0.00397201	2.21856e-19	1840	-0.0281322	0.00318047	2.22097e-18	68	0.00368166	2.15383e-14	-0.0304139	0.00240793	-12.6307	1.42942e-36	0.168587	0.00368166	2.15383e-14	2.89864e-32	37	3	58522689	3	58497729	R			NA	TRUE	ACOX2	NM_003500	5'UTR					TRUE				NA
cg25911968	-0.0229681	0.00390965	1.21619e-08	62	455	-0.0260701	0.0024392	6.55401e-26	1840	-0.0106586	0.00144047	2.13228e-13	68	0.00166746	1.63594e-10	-0.0163833	0.00129842	-12.6178	1.68369e-36	2.51117e-07	0.00166746	1.63594e-10	3.26581e-32	37	2	69085916	2	68939420	F			NA	NA								TRUE				NA
cg10163955	-0.0348166	0.00772644	9.7589e-06	62	455	-0.0444374	0.00477291	3.5087e-20	1840	-0.0365232	0.00440843	2.35577e-16	68	0.00510312	8.24452e-13	-0.0397421	0.00317744	-12.5076	6.7883e-36	0.412306	0.00510312	8.24452e-13	1.26185e-31	37	10	8101402	10	8141408	F	rs3781095		NA	NA	GATA3;GATA3	NM_001002295;NM_002051	Body;Body	chr10:8100384-8100768	S_Shore		RDMR	NA	10:8141313-8141520	10:8101119-8101716	Unclassified_Cell_type_specific	NA
cg25149218	-0.0275924	0.00681066	6.62437e-05	62	455	-0.0560193	0.00536571	7.89974e-25	1840	-0.0362007	0.00543188	3.56958e-11	68	0.00628786	8.54978e-09	-0.0423634	0.00350103	-12.1003	1.05279e-33	0.00230949	0.00628786	8.54978e-09	1.87871e-29	37	2	205411524	2	205119769	F			NA	NA	PARD3B;PARD3B;PARD3B	NM_152526;NM_057177;NM_205863	Body;Body;Body	chr2:205409939-205410910	S_Shore		RDMR	NA		2:205411521-205411673	Unclassified_Cell_type_specific	NA
cg14699112	-0.0352426	0.00662605	2.16112e-07	62	455	-0.0431265	0.00490415	3.25129e-18	1840	-0.0368863	0.00499407	2.35111e-13	68	0.00578106	1.76452e-10	-0.0392413	0.00325684	-12.0489	1.96634e-33	0.560529	0.00578106	1.76452e-10	3.37397e-29	37	4	141170338	4	141389788	F	rs76468427		NA	NA				chr4:141173834-141174567	N_Shelf			NA				NA
cg11064966	-0.030229	0.00648514	4.89717e-06	62	455	-0.0401959	0.00490732	4.79108e-16	1840	-0.0297644	0.00334864	1.53325e-18	68	0.00387633	1.60982e-14	-0.0331334	0.00275393	-12.0313	2.43309e-33	0.220119	0.00387633	1.60982e-14	4.02024e-29	37	5	32506514	5	32542271	R			NA	NA								TRUE				NA
cg27347104	-0.029846	0.00541348	8.09067e-08	62	455	-0.0300785	0.00378225	3.16128e-15	1840	-0.0263969	0.00320172	3.2596e-16	68	0.00370626	1.06193e-12	-0.0285179	0.00237808	-11.992	3.9153e-33	0.756561	0.00370626	1.06193e-12	6.23826e-29	37	12	6233657	12	6103918	R			NA	TRUE	VWF;VWF	NM_000552;NM_000552	1stExon;5'UTR					TRUE				NA
cg24771152	-0.0364458	0.00594158	2.96003e-09	62	455	-0.0212134	0.00228438	4.35408e-20	1840	-0.0148678	0.00229634	1.23834e-10	68	0.0026582	2.22931e-08	-0.0199227	0.00166325	-11.9782	4.6243e-33	0.00292504	0.0026582	2.22931e-08	7.11385e-29	37	6	31760608	6	31868587	F	rs35196751		NA	NA	VARS	NM_006295	Body	chr6:31763240-31763905	N_Shelf			NA				NA
cg10809958	-0.0169786	0.00494209	0.000682426	62	455	-0.0354968	0.00345664	4.2768e-24	1840	-0.0221594	0.00311633	1.68844e-12	68	0.00360742	8.11097e-10	-0.0266469	0.00222784	-11.9609	5.69618e-33	0.00256754	0.00360742	8.11097e-10	8.4707e-29	37	7	2758005	7	2724531	R			NA	NA				chr7:2758004-2758257	Island			NA	7:2724041-2725105			NA
cg13691108	-0.0321021	0.00630677	6.63052e-07	62	455	-0.0437925	0.0050058	4.79319e-18	1840	-0.0366176	0.00483489	5.90142e-14	68	0.00559679	6.0454e-11	-0.0383996	0.00321126	-11.9578	5.9101e-33	0.323183	0.00559679	6.0454e-11	8.50529e-29	37	20	37433247	20	36866661	F	rs77499484	rs59090641	NA	NA	PPP1R16B	NM_015568	TSS1500	chr20:37434206-37435592	N_Shore		RDMR	NA				NA
cg23537932	-0.0175468	0.00388391	9.27243e-06	62	455	-0.0375419	0.00338348	9.77256e-28	1840	-0.0173021	0.00332113	2.11995e-07	68	0.00384448	6.77906e-06	-0.0253644	0.00212572	-11.9321	8.04916e-33	2.25131e-05	0.00384448	6.77906e-06	1.12217e-28	37	10	121172463	10	121162453	F			NA	NA	GRK5	NM_005308	Body					TRUE	10:121162377-121162454			TRUE
cg26753608	-0.0206176	0.00591189	0.000567193	62	455	-0.0411114	0.00422563	7.54064e-22	1840	-0.0292455	0.00384449	4.59575e-14	68	0.00445032	4.97967e-11	-0.0323369	0.00272058	-11.8861	1.39843e-32	0.0127526	0.00445032	4.97967e-11	1.89052e-28	37	8	128938630	8	129007812	F			NA	NA	PVT1	NR_003367	Body					TRUE				TRUE
cg22345878	-0.0253315	0.0054214	4.65573e-06	62	455	-0.0351055	0.00377681	4.02676e-20	1840	-0.027417	0.00396743	6.78715e-12	68	0.00459263	2.3758e-09	-0.0305056	0.00256884	-11.8752	1.59198e-32	0.240929	0.00459263	2.3758e-09	2.08889e-28	37	12	6234313	12	6104574	F			NA	NA	VWF	NM_000552	TSS1500					NA				NA
cg17839959	-0.0127885	0.00284962	1.05764e-05	62	455	-0.0170405	0.00169224	2.96901e-23	1840	-0.00911442	0.00149095	1.20691e-09	68	0.0017259	1.28504e-07	-0.0130996	0.00111244	-11.7755	5.21835e-32	0.0045916	0.0017259	1.28504e-07	6.65153e-28	37	2	178421033	2	178129279	F	rs77584536		NA	NA				chr2:178417295-178417961	S_Shelf			NA				NA
cg16335858	-0.0211867	0.0037305	3.42512e-08	62	455	-0.0255213	0.00312911	6.33631e-16	1840	-0.0226524	0.00314153	8.32216e-13	68	0.00363659	4.69351e-10	-0.0234043	0.00200159	-11.6929	1.3862e-31	0.652524	0.00363659	4.69351e-10	1.71783e-27	37	11	45942027	11	45898603	F			NA	NA	GYLTL1B	NM_152312	TSS1500	chr11:45943513-45944852	N_Shore			NA				NA
cg22925751	-0.0192148	0.00520111	0.000265743	62	455	-0.0407274	0.00402781	1.98443e-23	1840	-0.0248379	0.00376163	5.36125e-11	68	0.00435441	1.16978e-08	-0.0299359	0.00257048	-11.646	2.40349e-31	0.00166315	0.00435441	1.16978e-08	2.89799e-27	37	12	93509137	12	92033268	F	rs73370164		NA	NA								TRUE				NA
cg11961495	-0.0328679	0.00670882	1.64204e-06	62	455	-0.0362064	0.00436842	2.18877e-16	1840	-0.0396449	0.00528705	1.03039e-13	68	0.00612021	9.31252e-11	-0.0363803	0.00314164	-11.58	5.20274e-31	0.755699	0.00612021	9.31252e-11	6.09325e-27	37	10	80873797	10	80543803	F	rs35273092		NA	NA	ZMIZ1	NM_020338	5'UTR					TRUE				TRUE
cg03403093	-0.0208514	0.00532917	0.00011501	62	455	-0.03756	0.00393846	4.48202e-21	1840	-0.0275522	0.00404184	1.28612e-11	68	0.00467877	3.8909e-09	-0.0303676	0.00262287	-11.578	5.32669e-31	0.0319717	0.00467877	3.8909e-09	6.09325e-27	37	2	99132041	2	98498473	R			NA	NA	INPP4A;INPP4A;INPP4A;INPP4A	NM_001566;NM_004027;NM_001134224;NM_001134225	5'UTR;5'UTR;5'UTR;5'UTR					TRUE				NA
cg22770911	-0.0310816	0.00720028	2.20964e-05	62	455	-0.0379383	0.00440953	1.6254e-17	1840	-0.0262845	0.00342762	2.89979e-14	68	0.00396776	3.48375e-11	-0.0314386	0.00272937	-11.5187	1.06255e-30	0.144963	0.00396776	3.48375e-11	1.18507e-26	37	10	8101307	10	8141313	F			NA	NA	GATA3;GATA3	NM_001002295;NM_002051	Body;Body	chr10:8100384-8100768	S_Shore		RDMR	NA	10:8141313-8141520	10:8101119-8101716	Unclassified_Cell_type_specific	NA
cg23913963	-0.0307111	0.00769144	8.37459e-05	62	455	-0.0569533	0.00574542	1.33404e-22	1840	-0.0319986	0.00520534	9.78486e-10	68	0.00602561	1.09363e-07	-0.0418222	0.00365783	-11.4336	2.84062e-30	0.00290796	0.00602561	1.09363e-07	3.09091e-26	37	1	17766917	1	17639504	F			NA	NA	RCC2	NM_018715	TSS1500	chr1:17764072-17765811	S_Shore			NA	1:17639424-17639505	1:17766694-17767257	Promoter_Associated	NA
cg17041511	-0.0232815	0.00538733	2.165e-05	62	455	-0.0393084	0.00421215	2.88304e-20	1840	-0.0265404	0.00411009	1.38383e-10	68	0.00475777	2.4284e-08	-0.0310395	0.00272171	-11.4044	3.97455e-30	0.0330116	0.00475777	2.4284e-08	4.20013e-26	37	17	61509620	17	58863352	R		rs72407568	NA	NA				chr17:61511653-61511886	N_Shelf			NA		17:61509472-61510321	Unclassified	NA
cg01433297	-0.0322773	0.00702705	6.63993e-06	62	455	-0.0537579	0.00572054	1.5995e-20	1840	-0.0316115	0.00501247	3.6221e-10	68	0.00580235	5.09268e-08	-0.0401846	0.00352428	-11.4022	4.07643e-30	0.0106782	0.00580235	5.09268e-08	4.20013e-26	37	20	4151816	20	4099816	R			NA	NA	SMOX;SMOX;SMOX;SMOX	NM_175839;NM_175841;NM_175840;NM_175842	5'UTR;5'UTR;5'UTR;5'UTR	chr20:4152866-4153398	N_Shore			TRUE				NA
cg01970716	-0.0230227	0.00532335	2.13464e-05	62	455	-0.036776	0.00403121	1.8656e-19	1840	-0.0234586	0.00342862	1.08354e-11	68	0.00396891	3.4089e-09	-0.0284747	0.0024976	-11.4008	4.14247e-30	0.0319556	0.00396891	3.4089e-09	4.20013e-26	37	14	24867164	14	23937004	F	rs2208446		NA	NA	NYNRIN	NM_025081	TSS1500	chr14:24868163-24868590	N_Shore			NA				NA
cg22946615	-0.0248729	0.00649948	0.000160557	62	455	-0.039045	0.00404389	1.49939e-21	1840	-0.033942	0.00585231	7.89169e-09	68	0.00677454	5.43629e-07	-0.0348553	0.00306264	-11.3808	5.21316e-30	0.178129	0.00677454	5.43629e-07	5.16827e-26	37	10	30257569	10	30297575	R			NA	NA								TRUE				NA
cg09022230	-0.0437751	0.0076182	2.411e-08	62	455	-0.0428142	0.00544443	6.29483e-15	1840	-0.0378107	0.00551743	1.00575e-11	68	0.00638688	3.21845e-09	-0.0414085	0.00363983	-11.3765	5.47572e-30	0.786435	0.00638688	3.21845e-09	5.31056e-26	37	7	5457225	7	5423751	R			NA	NA	TNRC18	NM_001080495	Body	chr7:5458503-5469256	N_Shore			NA				NA
cg06855485	-0.0275345	0.00677094	6.22928e-05	62	455	-0.0477678	0.00486207	3.07569e-22	1840	-0.0268765	0.00462481	7.37359e-09	68	0.0053536	5.16018e-07	-0.0359477	0.00317814	-11.3109	1.1584e-29	0.00572695	0.0053536	5.16018e-07	1.09956e-25	37	4	144303008	4	144522458	F			NA	NA	GAB1;GAB1	NM_002039;NM_207123	Body;Body					TRUE				NA
cg08844900	-0.0160725	0.00508156	0.00173639	62	455	-0.0324833	0.00342609	7.4597e-21	1840	-0.0204528	0.00288175	1.85534e-12	68	0.00333587	8.72401e-10	-0.0244535	0.00216279	-11.3064	1.21936e-29	0.00802067	0.00333587	8.72401e-10	1.1333e-25	37	3	129326790	3	130809480	R			NA	NA	PLXND1	NM_015103	TSS1500	chr3:129323915-129325332	S_Shore			NA		3:129326446-129326914	Unclassified_Cell_type_specific	NA
cg10338112	-0.0172967	0.00478948	0.000361681	62	455	-0.0344749	0.00369827	3.16197e-20	1840	-0.0246564	0.00354707	5.13119e-12	68	0.00410603	1.91436e-09	-0.026912	0.00238351	-11.2909	1.4551e-29	0.014164	0.00410603	1.91436e-09	1.32481e-25	37	16	30820353	16	30727854	R			NA	NA				chr16:30816794-30817243	S_Shelf			NA				NA
cg10301695	-0.030979	0.00564313	9.12715e-08	62	455	-0.0329669	0.00398661	2.54852e-16	1840	-0.0243971	0.00381139	1.98644e-10	68	0.004412	3.20761e-08	-0.0295167	0.00261986	-11.2665	1.91975e-29	0.339145	0.004412	3.20761e-08	1.7129e-25	37	12	6233717	12	6103978	F			NA	NA	VWF;VWF	NM_000552;NM_000552	1stExon;5'UTR					TRUE				NA
cg22234419	-0.0101113	0.00356151	0.00486109	62	455	-0.0228057	0.00232747	3.93285e-22	1840	-0.0133868	0.00194921	9.09108e-12	68	0.00225638	2.97705e-09	-0.0166063	0.00147466	-11.2611	2.04138e-29	0.001973	0.00225638	2.97705e-09	1.7857e-25	37	3	145875907	3	147358597	R			NA	NA	PLOD2;PLOD2	NM_000935;NM_182943	Body;Body	chr3:145878430-145879287	N_Shelf			NA				NA
cg16861241	-0.013204	0.00508179	0.00987183	62	455	-0.0275592	0.00296329	3.84306e-20	1840	-0.0322336	0.00433438	1.62304e-13	68	0.0050174	1.32425e-10	-0.0256344	0.00228024	-11.242	2.53599e-29	0.0171199	0.0050174	1.32425e-10	2.1757e-25	37	17	74138396	17	71649991	R			NA	NA	FOXJ1	NM_001454	TSS1500	chr17:74135922-74137802	S_Shore		RDMR	TRUE				NA
cg06458086	-0.0306035	0.005956	5.2525e-07	62	455	-0.0351123	0.00444722	4.93308e-15	1840	-0.0313539	0.00442642	2.04673e-12	68	0.00512395	9.41171e-10	-0.0327993	0.00292553	-11.2114	3.58529e-29	0.784272	0.00512395	9.41171e-10	3.0179e-25	37	6	131162400	6	131204093	F			NA	NA	EPB41L2;EPB41L2;EPB41L2	NM_001431;NM_001135555;NM_001135554	3'UTR;3'UTR;3'UTR					TRUE				NA
cg08343644	-0.0195733	0.00633228	0.00219859	62	455	-0.0189182	0.00225206	8.76831e-17	1840	-0.0204422	0.00261576	9.5178e-15	68	0.00302797	1.46688e-11	-0.0194695	0.00173768	-11.2043	3.88481e-29	0.921555	0.00302797	1.46688e-11	3.20946e-25	37	16	57662060	16	56219561	F			NA	NA	GPR56;GPR56;GPR56;GPR56;GPR56;GPR56;GPR56	NM_201525;NM_001145771;NM_201524;NM_001145772;NM_001145770;NM_005682;NM_001145773	TSS1500;TSS1500;TSS1500;TSS1500;5'UTR;5'UTR;TSS1500					TRUE		16:57660834-57662332	Unclassified_Cell_type_specific	NA
cg10965178	-0.0216419	0.0059746	0.000347407	62	455	-0.0401253	0.00443362	3.53346e-19	1840	-0.0315741	0.00450942	3.61529e-12	68	0.00522004	1.46075e-09	-0.0329305	0.00294136	-11.1957	4.28135e-29	0.0434801	0.00522004	1.46075e-09	3.47276e-25	37	1	43766752	1	43539339	R			NA	NA	TIE1	NM_005424	1stExon	chr1:43770522-43770880	N_Shelf			NA				NA
cg06785429	-0.0211661	0.00524396	7.03901e-05	62	455	-0.022509	0.00302957	1.6566e-13	1840	-0.0225372	0.00266777	6.23489e-17	68	0.00308816	2.92211e-13	-0.0223256	0.0019993	-11.1667	5.93286e-29	0.97178	0.00308816	2.92211e-13	4.72642e-25	37	3	182699414	3	184182108	R			NA	TRUE	DCUN1D1	NM_020640	TSS1500	chr3:182697749-182698731	S_Shore			NA				NA
cg14310198	-0.0333162	0.00616868	1.43222e-07	62	455	-0.0349019	0.00435711	2.01039e-15	1840	-0.0330491	0.0051165	1.36671e-10	68	0.00592278	2.40523e-08	-0.0340226	0.00305052	-11.153	6.92069e-29	0.96038	0.00592278	2.40523e-08	5.41666e-25	37	9	134536436	9	133526257	F			NA	NA	RAPGEF1;RAPGEF1	NM_198679;NM_005312	Body;Body					TRUE				NA
cg16505891	-0.0260665	0.00546719	3.01815e-06	62	455	-0.0332798	0.00427746	1.1969e-14	1840	-0.0269359	0.00357323	7.67713e-14	68	0.00413631	7.41314e-11	-0.0291032	0.00261212	-11.1416	7.86949e-29	0.463829	0.00413631	7.41314e-11	6.05306e-25	37	14	91859797	14	90929550	F			TRUE	NA	CCDC88C	NM_001080414	Body					NA				NA
cg14579118	-0.0245137	0.00536045	7.26458e-06	62	455	-0.0289772	0.00393064	2.52554e-13	1840	-0.0311438	0.00384369	1.01242e-15	68	0.00444939	2.56772e-12	-0.0286713	0.00258165	-11.1058	1.17578e-28	0.632419	0.00444939	2.56772e-12	8.89062e-25	37	7	43797547	7	43764072	R			NA	NA	BLVRA	NM_000712	TSS1500	chr7:43797823-43798802	N_Shore		RDMR	TRUE				NA
cg11998307	-0.0252291	0.00570314	1.39742e-05	62	455	-0.0280151	0.00370825	6.57168e-14	1840	-0.0259578	0.00328812	5.16349e-15	68	0.00380628	9.12026e-12	-0.0266953	0.00240779	-11.0871	1.44982e-28	0.891233	0.00380628	9.12026e-12	1.078e-24	37	17	1549434	17	1496184	F			NA	TRUE	SCARF1;SCARF1;SCARF1;SCARF1;SCARF1	NM_145352;NM_003693;NM_145350;NR_028075;NR_028076	TSS1500;TSS1500;TSS1500;TSS1500;TSS1500	chr17:1551730-1553249	N_Shelf			NA				NA
cg21674927	-0.0227786	0.00560078	6.2176e-05	62	455	-0.0376513	0.00427037	2.67044e-18	1840	-0.0261356	0.00388042	2.22691e-11	68	0.00449192	5.94239e-09	-0.0299841	0.00270888	-11.0688	1.77738e-28	0.0604229	0.00449192	5.94239e-09	1.29989e-24	37	2	102644247	2	102010679	R			NA	NA	IL1R2;IL1R2	NM_173343;NM_004633	Body;Body					TRUE				TRUE
cg02311364	-0.0277472	0.00592364	4.41689e-06	62	455	-0.0353865	0.00451692	7.91212e-15	1840	-0.0303242	0.00417313	5.57792e-13	68	0.00483074	3.44404e-10	-0.0317755	0.00288238	-11.024	2.92636e-28	0.551067	0.00483074	3.44404e-10	2.08703e-24	37	3	13001256	3	12976256	R			NA	NA	IQSEC1;IQSEC1	NM_001134382;NM_014869	Body;Body					TRUE				NA
cg14601444	-0.0289202	0.00687656	3.5225e-05	62	455	-0.0411899	0.00555785	1.89946e-13	1840	-0.0418979	0.0050478	2.08027e-16	68	0.00584325	7.4829e-13	-0.0383069	0.00347505	-11.0234	2.94723e-28	0.285067	0.00584325	7.4829e-13	2.08703e-24	37	2	74607536	2	74461044	F			NA	NA	DCTN1;DCTN1	NM_004082;NM_001135040	TSS200;TSS200					TRUE				TRUE
cg12604858	-0.0187623	0.00408214	6.55521e-06	62	455	-0.0261668	0.0035351	2.0306e-13	1840	-0.0222972	0.00279856	2.92989e-15	68	0.00323957	5.8703e-12	-0.0227116	0.00206146	-11.0172	3.15661e-28	0.385264	0.00323957	5.8703e-12	2.20038e-24	37	6	38061902	6	38169880	F	rs73419986		NA	NA	ZFAND3	NM_021943	Body					TRUE				NA
cg24586978	-0.0251778	0.0061681	5.85351e-05	62	455	-0.0422418	0.00459224	9.53867e-20	1840	-0.0280819	0.0047804	5.08809e-09	68	0.00553371	3.8812e-07	-0.0336772	0.00306628	-10.9831	4.60985e-28	0.0407735	0.00553371	3.8812e-07	3.16395e-24	37	13	99612723	13	98410724	R			NA	NA	DOCK9;DOCK9;DOCK9;DOCK9	NM_015296;NM_001130050;NM_001130049;NM_001130048	Body;Body;Body;Body					TRUE				NA
cg18568061	-0.0186746	0.005644	0.00106162	62	455	-0.0330723	0.00391309	5.75037e-17	1840	-0.0265272	0.00350834	6.47487e-14	68	0.0040612	6.49611e-11	-0.0276772	0.00252112	-10.9781	4.86981e-28	0.10407	0.0040612	6.49611e-11	3.29173e-24	37	17	40575822	17	37829348	F			NA	NA	PTRF	NM_012232	TSS1500	chr17:40573740-40575526	S_Shore			NA		17:40575747-40575933	Unclassified_Cell_type_specific	NA
cg14270346	-0.0123012	0.00428735	0.00443348	62	455	-0.0261615	0.00281421	3.98436e-20	1840	-0.0188684	0.00281496	2.76464e-11	68	0.00325855	7.02096e-09	-0.0209189	0.00190746	-10.9669	5.51099e-28	0.0191915	0.00325855	7.02096e-09	3.66954e-24	37	9	38026076	9	38016076	F			NA	NA	SHB	NM_003028	Body					TRUE				TRUE
cg03857453	-0.0215177	0.00503366	2.63806e-05	62	455	-0.0347819	0.00395506	3.2402e-18	1840	-0.0253566	0.00407997	6.43486e-10	68	0.00472291	7.92357e-08	-0.0283995	0.00259739	-10.9339	7.94061e-28	0.0868004	0.00472291	7.92357e-08	5.20957e-24	37	5	142729913	5	142710106	F			NA	NA	NR3C1;NR3C1;NR3C1;NR3C1;NR3C1;NR3C1;NR3C1	NM_001018076;NM_000176;NM_001024094;NM_001020825;NM_001018075;NM_001018077;NM_001018074	Body;Body;Body;Body;Body;Body;Body					TRUE				NA
cg19825437	-0.0353251	0.00646421	1.03651e-07	62	455	-0.047975	0.0047793	4.02995e-23	1840	-0.0157317	0.00493681	0.00146548	68	0.00571478	0.00590866	-0.0348559	0.00318901	-10.93	8.28342e-28	8.52898e-05	0.00571478	0.00590866	5.35571e-24	37	3	169383292	3	170865986	R			NA	NA				chr3:169386268-169387187	N_Shelf		RDMR	NA		3:169383094-169383375	Unclassified_Cell_type_specific	NA
cg04500377	-0.0321755	0.00579836	6.7327e-08	62	455	-0.0286121	0.00375873	4.27929e-14	1840	-0.0244098	0.00374851	9.72459e-11	68	0.00433921	1.85068e-08	-0.0278493	0.00255126	-10.9159	9.67895e-28	0.541681	0.00433921	1.85068e-08	6.1686e-24	37	8	38090208	8	38209365	F			NA	NA	DDHD2;DDHD2;DDHD2	NM_001164232;NM_015214;NM_001164234	5'UTR;5'UTR;5'UTR	chr8:38088735-38089956	S_Shore		RDMR	NA				NA
cg18129282	-0.0209832	0.00608104	0.000646897	62	455	-0.0349225	0.00419331	1.58234e-16	1840	-0.028894	0.00389835	1.94719e-13	68	0.00451267	1.52484e-10	-0.0298632	0.00274185	-10.8916	1.26374e-27	0.162495	0.00451267	1.52484e-10	7.94064e-24	37	10	89987284	10	89977264	F	rs11202686		NA	NA								TRUE				NA
cg09747445	-0.0309145	0.00793736	0.000123354	62	455	-0.0376338	0.00580977	1.19229e-10	1840	-0.0443337	0.00482382	1.09682e-19	68	0.00558397	1.9984e-15	-0.0390289	0.00359048	-10.8701	1.60008e-27	0.366909	0.00558397	1.9984e-15	9.91436e-24	37	15	70387268	15	68174322	R			NA	NA	TLE3;TLE3;TLE3	NM_001105192;NM_020908;NM_005078	Body;Body;Body	chr15:70387929-70393206	N_Shore			NA				NA
cg06891775	-0.0205676	0.0045516	9.23322e-06	62	455	-0.0249587	0.00333859	1.18036e-13	1840	-0.0221421	0.00295181	1.01013e-13	68	0.00341697	9.17026e-11	-0.0229322	0.00211461	-10.8446	2.11456e-27	0.707583	0.00341697	9.17026e-11	1.29227e-23	37	10	80704982	10	80374988	F	rs78722328		NA	NA	LOC283050;LOC283050;LOC283050	NR_024431;NR_024429;NR_015429	Body;Body;Body					TRUE		10:80704796-80705101	Unclassified_Cell_type_specific	TRUE
cg06242243	-0.0314192	0.00575132	1.0459e-07	62	455	-0.0314613	0.0042779	2.87363e-13	1840	-0.029028	0.00432762	2.67915e-11	68	0.00500959	6.85295e-09	-0.0306737	0.00283157	-10.8327	2.40839e-27	0.923756	0.00500959	6.85295e-09	1.45195e-23	37	12	124992461	12	123558414	F			NA	NA	NCOR2;NCOR2	NM_006312;NM_001077261	5'UTR;5'UTR					TRUE				TRUE
cg07471614	-0.0135592	0.00463223	0.00370569	62	455	-0.0346728	0.00332356	8.53611e-25	1840	-0.0166219	0.00332735	6.46569e-07	68	0.00385168	1.5925e-05	-0.0239135	0.00221111	-10.8151	2.91873e-27	7.26286e-05	0.00385168	1.5925e-05	1.73616e-23	37	8	125855152	8	125924333	F			NA	NA								TRUE				NA
cg13280788	-0.0180209	0.005417	0.000997933	62	455	-0.0337411	0.00370214	2.0174e-19	1840	-0.0232435	0.00369657	4.07565e-10	68	0.00427909	5.57654e-08	-0.0268806	0.00248718	-10.8076	3.16714e-27	0.0328512	0.00427909	5.57654e-08	1.85913e-23	37	17	46652179	17	44007178	R			NA	NA	HOXB3	NM_002146	TSS1500	chr17:46654053-46654369	N_Shore			NA				NA
cg01871427	-0.0231972	0.0081759	0.00488751	62	455	-0.0469042	0.00549739	2.95546e-17	1840	-0.0452137	0.00603241	1.05632e-13	68	0.00698302	9.49362e-11	-0.0412253	0.00381922	-10.7942	3.66759e-27	0.0438167	0.00698302	9.49362e-11	2.12494e-23	37	12	90341955	12	88866086	F			NA	NA								TRUE				NA
cg21304158	-0.0203173	0.00530255	0.000157672	62	455	-0.0308675	0.00373011	2.43136e-16	1840	-0.0218034	0.00308236	2.19126e-12	68	0.00356809	9.92135e-10	-0.025022	0.0023188	-10.7909	3.79935e-27	0.13155	0.00356809	9.92135e-10	2.17306e-23	37	2	241937034	2	241585707	R			NA	NA	SNED1	NM_001080437	TSS1500	chr2:241937716-241938468	N_Shore			TRUE				NA
cg12581691	-0.0168071	0.00404538	4.34915e-05	62	455	-0.0292996	0.00373215	6.97303e-15	1840	-0.022596	0.00304776	1.91724e-13	68	0.00352804	1.50664e-10	-0.0231941	0.00216554	-10.7105	9.08441e-27	0.0743591	0.00352804	1.50664e-10	5.1301e-23	37	17	17642247	17	17582972	F			NA	NA	RAI1	NM_030665	5'UTR					TRUE				TRUE
cg11217654	-0.0147505	0.00261827	4.34631e-08	62	455	-0.0147222	0.00187917	7.89999e-15	1840	-0.0119266	0.0022007	6.82764e-08	68	0.0025475	2.84515e-06	-0.0139905	0.00130952	-10.6837	1.21287e-26	0.640112	0.0025475	2.84515e-06	6.76362e-23	37	11	9283463	11	9240039	R			NA	NA	DENND5A	NM_015213	Body	chr11:9286273-9287091	N_Shelf			NA				NA
cg10577534	-0.0348556	0.00829459	3.57282e-05	62	455	-0.0412496	0.00510538	1.16377e-15	1840	-0.0321158	0.00487782	6.06974e-11	68	0.00564649	1.28718e-08	-0.036747	0.00344489	-10.6671	1.45086e-26	0.471776	0.00564649	1.28718e-08	7.99091e-23	37	15	67354460	15	65141514	F	rs76420914		NA	NA				chr15:67357339-67359061	N_Shelf			NA		15:67354430-67354592	Unclassified_Cell_type_specific	NA
cg00776080	-0.0113854	0.00360336	0.00175518	62	455	-0.0119868	0.0014525	2.92169e-16	1840	-0.0139532	0.00204916	1.35313e-11	68	0.00237207	4.0464e-09	-0.0124028	0.00117143	-10.5877	3.3984e-26	0.744918	0.00237207	4.0464e-09	1.84892e-22	37	12	53442322	12	51728589	R			NA	NA	TENC1;TENC1	NM_198316;NM_015319	5'UTR;TSS1500	chr12:53440579-53440840	S_Shore			TRUE		12:53441876-53443325	Promoter_Associated	NA
cg01233392	-0.0277809	0.00811638	0.000713723	62	455	-0.0469992	0.00535791	3.9206e-18	1840	-0.031735	0.00509639	5.96907e-10	68	0.0058995	7.47868e-08	-0.0377251	0.00356355	-10.5864	3.4475e-26	0.063034	0.0058995	7.47868e-08	1.85303e-22	37	1	85665444	1	85438032	F	rs71691813		NA	NA	SYDE2	NM_032184	Body	chr1:85665818-85667650	N_Shore			NA				NA
cg01525376	-0.0120222	0.00451934	0.00826715	62	455	-0.0238876	0.00273528	5.45383e-18	1840	-0.0174687	0.00257033	1.47697e-11	68	0.00297537	4.32923e-09	-0.0194691	0.00183935	-10.5848	3.50618e-26	0.0556708	0.00297537	4.32923e-09	1.86213e-22	37	1	32716212	1	32488799	R			NA	TRUE	LCK	NM_005356	TSS1500	chr1:32713918-32714186	S_Shelf			NA		1:32715300-32716350	Promoter_Associated	NA
cg26904049	-0.017838	0.00593893	0.00291313	62	455	-0.0335281	0.00394179	3.67629e-17	1840	-0.0263592	0.00381293	6.66761e-12	68	0.00441379	2.34343e-09	-0.0278851	0.00263485	-10.5832	3.56559e-26	0.0808255	0.00441379	2.34343e-09	1.87141e-22	37	1	167091094	1	165357718	F			NA	NA	DUSP27	NM_001080426	Body	chr1:167090575-167091010	S_Shore			NA		1:167090716-167091129	Unclassified_Cell_type_specific	TRUE
cg22158648	-0.0268267	0.00641996	3.93921e-05	62	455	-0.0415532	0.00614765	1.85659e-11	1840	-0.0362238	0.00438957	3.0646e-16	68	0.00508129	1.01208e-12	-0.0352514	0.00334352	-10.5432	5.46161e-26	0.245438	0.00508129	1.01208e-12	2.83321e-22	37	18	20713759	18	18967757	F			NA	NA	CABLES1	NR_023359	TSS1500	chr18:20714968-20717071	N_Shore		RDMR	NA				NA
cg08849294	-0.0378999	0.00699113	1.29283e-07	62	455	-0.0322138	0.00484651	3.9346e-11	1840	-0.0310322	0.00435009	1.43614e-12	68	0.0050356	7.15711e-10	-0.0328944	0.00312393	-10.5298	6.29565e-26	0.715659	0.0050356	7.15711e-10	3.22833e-22	37	7	2758014	7	2724540	F			NA	NA				chr7:2758004-2758257	Island			NA	7:2724041-2725105			NA
cg02743070	-0.0168776	0.00405931	4.29393e-05	62	455	-0.0271007	0.00320146	5.14871e-17	1840	-0.0166496	0.00269599	8.21002e-10	68	0.00312084	9.55606e-08	-0.0206105	0.00195767	-10.5281	6.41304e-26	0.0375102	0.00312084	9.55606e-08	3.25115e-22	37	10	80834309	10	80504315	R			NA	NA	ZMIZ1	NM_020338	5'UTR	chr10:80827070-80830537	S_Shelf			TRUE				NA
cg09403559	-0.0151202	0.00427014	0.000467897	62	455	-0.0286753	0.00334811	2.25337e-17	1840	-0.0206431	0.00317695	1.06575e-10	68	0.00367759	1.98597e-08	-0.0225407	0.00214182	-10.5241	6.6922e-26	0.0360934	0.00367759	1.98597e-08	3.35456e-22	37	16	56334857	16	54892358	F			NA	NA	GNAO1;GNAO1	NM_020988;NM_138736	Body;Body					TRUE		16:56334823-56334915	Unclassified_Cell_type_specific	NA
cg10381440	-0.0214256	0.00694902	0.00225488	62	455	-0.0329572	0.00461625	1.34384e-12	1840	-0.0451674	0.00518172	6.63564e-18	68	0.00599828	5.07372e-14	-0.034011	0.00323712	-10.5066	8.0581e-26	0.033514	0.00599828	5.07372e-14	3.99436e-22	37	17	46622715	17	43977714	F			NA	NA	HOXB2	NM_002145	TSS1500	chr17:46620367-46621373	S_Shore		RDMR	NA				TRUE
cg20731257	-0.0420409	0.00950509	1.40184e-05	62	455	-0.0374639	0.00495879	6.55873e-14	1840	-0.0454779	0.00670318	1.599e-11	68	0.00775949	4.60264e-09	-0.0401527	0.00382514	-10.497	8.91313e-26	0.668831	0.00775949	4.60264e-09	4.36964e-22	37	2	87883497	2	87664612	F			NA	NA								NA	2:87664612-87664679			NA
cg14966782	-0.0189226	0.0048124	0.00010658	62	455	-0.02436	0.0031101	8.0138e-15	1840	-0.0202081	0.00300227	2.29214e-11	68	0.00347537	6.07617e-09	-0.0218376	0.00208807	-10.4583	1.34281e-25	0.53673	0.00347537	6.07617e-09	6.51151e-22	37	2	109812089	2	109178521	R		rs62151262	NA	NA	SH3RF3	NM_001099289	Body					TRUE				NA
cg06445343	-0.0347456	0.00816612	2.8682e-05	62	455	-0.0389043	0.00508187	3.0886e-14	1840	-0.0348972	0.00525564	4.19989e-11	68	0.00608384	9.69147e-09	-0.0367909	0.00351941	-10.4537	1.40889e-25	0.846806	0.00608384	9.69147e-09	6.75851e-22	37	7	94538403	7	94376339	F			NA	NA	PPP1R9A;PPP1R9A;PPP1R9A;PPP1R9A;PPP1R9A	NM_001166161;NM_001166160;NM_001166163;NM_001166162;NM_017650	TSS1500;5'UTR;TSS1500;TSS1500;5'UTR	chr7:94536849-94537477	S_Shore			NA				NA
cg00636737	-0.0192129	0.00742619	0.0101883	62	455	-0.0404598	0.00473002	2.46584e-17	1840	-0.0315422	0.00458192	8.13522e-12	68	0.00530395	2.73242e-09	-0.0333213	0.00318827	-10.4512	1.44657e-25	0.0498003	0.00530395	2.73242e-09	6.86543e-22	37	20	62695569	20	62166013	R			NA	NA	TCEA2;TCEA2	NM_003195;NM_198723	Body;5'UTR	chr20:62693942-62695282	S_Shore			NA		20:62694020-62695720	Promoter_Associated	NA
cg15007228	-0.0167323	0.00489247	0.00072081	62	455	-0.0248195	0.00345978	1.05327e-12	1840	-0.0210868	0.00263374	2.15954e-15	68	0.00304878	4.6303e-12	-0.0216446	0.0020721	-10.4457	1.53295e-25	0.389905	0.00304878	4.6303e-12	7.19881e-22	37	1	2210335	1	2200195	F			NA	NA	SKI	NM_003036	Body	chr1:2212020-2213881	N_Shore			TRUE				TRUE
cg17004733	-0.0219355	0.00526912	4.20135e-05	62	455	-0.0305665	0.00415506	2.83034e-13	1840	-0.0281478	0.00387905	6.00104e-13	68	0.00449033	3.6445e-10	-0.027565	0.00263948	-10.4433	1.57218e-25	0.431679	0.00449033	3.6445e-10	7.30614e-22	37	1	55682652	1	55455240	R			NA	NA				chr1:55680465-55681708	S_Shore		RDMR	NA		1:55682605-55682854	Unclassified_Cell_type_specific	NA
cg03289906	-0.0429333	0.00860245	1.06613e-06	62	455	-0.0399755	0.00559608	1.30548e-12	1840	-0.0411593	0.00617958	3.6646e-11	68	0.00715338	8.72469e-09	-0.0409465	0.00392269	-10.4384	1.65605e-25	0.958711	0.00715338	8.72469e-09	7.57554e-22	37	7	94538408	7	94376344	F			NA	NA	PPP1R9A;PPP1R9A;PPP1R9A;PPP1R9A;PPP1R9A	NM_001166161;NM_001166160;NM_001166163;NM_001166162;NM_017650	TSS1500;5'UTR;TSS1500;TSS1500;5'UTR	chr7:94536849-94537477	S_Shore			NA				NA
cg23534245	-0.0232827	0.00891432	0.0094987	62	455	-0.0383263	0.00515937	1.67241e-13	1840	-0.037745	0.00464445	8.34879e-16	68	0.00537634	2.20979e-12	-0.0358552	0.00343508	-10.4379	1.66411e-25	0.310045	0.00537634	2.20979e-12	7.57554e-22	37	20	6751435	20	6699435	F			NA	NA	BMP2	NM_001200	Body	chr20:6748052-6749546	S_Shore		CDMR	NA				NA
cg21734356	-0.0328113	0.00680619	2.36483e-06	62	455	-0.0242748	0.00404096	2.26963e-09	1840	-0.0290501	0.00352029	3.06612e-16	68	0.00407503	1.01252e-12	-0.0275733	0.002644	-10.4286	1.83521e-25	0.499105	0.00407503	1.01252e-12	8.27003e-22	37	18	3498854	18	3488854	F			NA	NA	DLGAP1;DLGAP1	NM_001003809;NM_004746	3'UTR;3'UTR	chr18:3498941-3499358	N_Shore			TRUE				NA
cg03561416	-0.0245306	0.00419875	1.4464e-08	62	455	-0.0255558	0.00343996	1.66459e-13	1840	-0.0164216	0.00292339	2.25916e-08	68	0.00338407	1.21842e-06	-0.0218115	0.00209174	-10.4274	1.85808e-25	0.126124	0.00338407	1.21842e-06	8.28937e-22	37	6	157254584	6	157296276	F			NA	NA	ARID1B;ARID1B;ARID1B	NM_017519;NM_175863;NM_020732	Body;Body;Body					TRUE				NA
cg20125920	-0.0221306	0.00761409	0.00395097	62	455	-0.0490004	0.00600726	6.29681e-16	1840	-0.0357625	0.00480614	1.57303e-13	68	0.00556351	1.29252e-10	-0.0374669	0.00359752	-10.4147	2.12558e-25	0.0198714	0.00556351	1.29252e-10	9.38884e-22	37	10	21804624	10	21844630	R		rs35145063	NA	NA	C10orf140	NM_207371	Body	chr10:21805197-21805459	N_Shore		RDMR	NA		10:21804619-21804663	Unclassified_Cell_type_specific	NA
cg27175509	-0.0159443	0.00511101	0.00200281	62	455	-0.0272457	0.00336085	9.38255e-16	1840	-0.0205225	0.0029252	3.28124e-12	68	0.00338616	1.35534e-09	-0.0224847	0.00216155	-10.4021	2.42524e-25	0.136685	0.00338616	1.35534e-09	1.06075e-21	37	2	149891051	2	149599297	F	rs7603165		NA	NA				chr2:149895022-149895808	N_Shelf			NA				NA
cg16014606	-0.0394158	0.00828379	3.15407e-06	62	455	-0.0412306	0.005251	6.90065e-15	1840	-0.0347478	0.00610614	1.48599e-08	68	0.00706837	8.83539e-07	-0.0390261	0.00375676	-10.3882	2.80532e-25	0.761536	0.00706837	8.83539e-07	1.21507e-21	37	11	10715221	11	10671797	F			NA	NA	MRVI1;MRVI1;MRVI1;MRVI1;MRVI1	NM_001100163;NM_001100163;NM_130385;NM_130385;NM_001100167	1stExon;5'UTR;1stExon;5'UTR;TSS200			low-CpG:10671608-10672092		TRUE				NA
cg13470063	-0.0220641	0.0054299	6.30868e-05	62	455	-0.0307742	0.00460821	3.19514e-11	1840	-0.0253409	0.00314696	1.50346e-15	68	0.00364287	3.49321e-12	-0.0262664	0.00252891	-10.3865	2.85742e-25	0.444768	0.00364287	3.49321e-12	1.22574e-21	37	1	43766206	1	43538793	R			NA	NA	TIE1	NM_005424	TSS1500					TRUE				NA
cg13987674	-0.0199427	0.00595916	0.000931801	62	455	-0.0338136	0.00446769	5.93371e-14	1840	-0.0347785	0.00454486	3.2754e-14	68	0.00526106	3.82906e-11	-0.0307037	0.00295671	-10.3844	2.92044e-25	0.113875	0.00526106	3.82906e-11	1.24084e-21	37	1	24649494	1	24522081	F			NA	NA	GRHL3;GRHL3;GRHL3	NM_198174;NM_198173;NM_021180	TSS200;Body;TSS200	chr1:24648202-24648985	S_Shore			NA		1:24647785-24649616	Unclassified	TRUE
cg11360546	-0.0237929	0.00580795	5.51482e-05	62	455	-0.0357257	0.00439792	8.22678e-16	1840	-0.0273732	0.00446377	1.07307e-09	68	0.00516719	1.17403e-07	-0.0301148	0.00290129	-10.3798	3.06467e-25	0.212882	0.00516719	1.17403e-07	1.28984e-21	37	7	1094263	7	1060789	F			NA	NA	C7orf50;C7orf50;C7orf50	NM_001134395;NM_032350;NM_001134396	Body;Body;Body	chr7:1097405-1097953	N_Shelf			NA	7:1060605-1061596			NA
cg22860172	-0.0196543	0.00617673	0.00162977	62	455	-0.0302534	0.00352828	2.07448e-17	1840	-0.021623	0.00357432	1.77997e-09	68	0.00413758	1.73219e-07	-0.025513	0.00246218	-10.362	3.69315e-25	0.166236	0.00413758	1.73219e-07	1.53982e-21	37	1	3099917	1	3089777	F			NA	NA	PRDM16;PRDM16	NM_022114;NM_199454	Body;Body	chr1:3102540-3103352	N_Shelf			NA				NA
cg10681525	-0.0256758	0.00510231	8.75486e-07	62	455	-0.0269515	0.00375891	1.08145e-12	1840	-0.0240595	0.00374926	1.7924e-10	68	0.00434008	2.96359e-08	-0.0257034	0.00248241	-10.3542	4.00486e-25	0.880849	0.00434008	2.96359e-08	1.65432e-21	37	3	186570987	3	188053681	R			NA	NA	ADIPOQ	NM_004797	Body					NA				NA
cg07418114	-0.0138111	0.00479093	0.00425208	62	455	-0.0246852	0.00334216	2.28242e-13	1840	-0.022188	0.00277581	2.39186e-15	68	0.00321323	5.01332e-12	-0.0215731	0.00208539	-10.3449	4.4148e-25	0.171313	0.00321323	5.01332e-12	1.80693e-21	37	1	156836717	1	155103341	R		rs66574101	NA	NA	NTRK1;NTRK1;NTRK1	NM_001007792;NM_002529;NM_001012331	Body;Body;Body					TRUE				NA
cg17775079	-0.0267572	0.00659344	6.44476e-05	62	455	-0.0320325	0.00419162	3.41862e-14	1840	-0.0238527	0.00352906	1.89953e-11	68	0.00408519	5.25656e-09	-0.0276598	0.00267415	-10.3434	4.48318e-25	0.372418	0.00408519	5.25656e-09	1.81824e-21	37	10	65224441	10	64894447	R			NA	NA	JMJD1C;LOC84989	NM_032776;NR_027182	Body;TSS1500	chr10:65224870-65225887	N_Shore			NA				NA
cg04070601	-0.0174991	0.00531414	0.00112078	62	455	-0.0335313	0.00390748	1.96062e-17	1840	-0.0205535	0.00320686	1.88591e-10	68	0.00371221	3.08191e-08	-0.0248298	0.00240097	-10.3416	4.56924e-25	0.0166644	0.00371221	3.08191e-08	1.83644e-21	37	12	50067887	12	48354154	R			NA	NA	FMNL3;FMNL3	NM_198900;NM_175736	Body;Body					TRUE		12:50067819-50068081	Promoter_Associated	TRUE
cg10001186	-0.0257977	0.0078982	0.0012274	62	455	-0.0514381	0.00605011	3.7937e-17	1840	-0.0360389	0.0055967	1.5547e-10	68	0.00647865	2.65613e-08	-0.0398577	0.0038583	-10.3304	5.13642e-25	0.0275968	0.00647865	2.65613e-08	2.04597e-21	37	11	94882829	11	94522477	F			NA	NA				chr11:94883335-94883565	N_Shore		RDMR	NA				NA
cg07797660	-0.0269504	0.00746131	0.000360848	62	455	-0.0351169	0.00461484	4.36356e-14	1840	-0.0287227	0.00408746	3.03386e-12	68	0.00473157	1.27571e-09	-0.031172	0.00302081	-10.3191	5.77733e-25	0.517153	0.00473157	1.27571e-09	2.28089e-21	37	1	3239139	1	3228999	R			NA	NA	PRDM16;PRDM16	NM_022114;NM_199454	Body;Body	chr1:3239915-3240261	N_Shore			NA				NA
cg19137417	-0.0292789	0.00607304	2.36113e-06	62	455	-0.0346545	0.00550169	3.74087e-10	1840	-0.0363774	0.0047214	2.20354e-14	68	0.00546541	2.81515e-11	-0.0337138	0.0032681	-10.316	5.96305e-25	0.670312	0.00546541	2.81515e-11	2.33357e-21	37	17	79362935	17	76977530	F			NA	NA				chr17:79360383-79361723	S_Shore			NA		17:79362667-79363171	Unclassified_Cell_type_specific	NA
cg06128881	-0.0221514	0.0048505	7.4687e-06	62	455	-0.0302521	0.00404141	1.09872e-13	1840	-0.0235533	0.00362233	1.03514e-10	68	0.00419315	1.94189e-08	-0.025736	0.00249529	-10.3138	6.10215e-25	0.355972	0.00419315	1.94189e-08	2.36724e-21	37	X	46616842	X	46501786	R			NA	NA	SLC9A7	NM_032591	Body	chrX:46618013-46618969	N_Shore			TRUE				NA
cg01206410	-0.00402458	0.00367504	0.274423	62	455	-0.0224511	0.00245156	1.36787e-19	1840	-0.0158761	0.00220859	9.75148e-13	68	0.00255663	5.30562e-10	-0.0164264	0.00159431	-10.3031	6.82121e-25	0.000160561	0.00255663	5.30562e-10	2.62337e-21	37	1	236229809	1	234296432	R			NA	NA	NID1	NM_002508	TSS1500	chr1:236227682-236228817	S_Shore			NA		1:236229794-236230585	Unclassified	NA
cg26258437	-0.0199598	0.00488848	5.82784e-05	62	455	-0.0214493	0.00311206	7.51442e-12	1840	-0.0249039	0.00330114	7.35405e-14	68	0.00382135	7.17012e-11	-0.0222651	0.00216382	-10.2898	7.83738e-25	0.681144	0.00382135	7.17012e-11	2.98842e-21	37	4	57653406	4	57348163	R			NA	NA								TRUE				TRUE
cg25609878	-0.0195238	0.00545005	0.000402404	62	455	-0.035339	0.00503831	3.24026e-12	1840	-0.0329353	0.00408609	1.41342e-15	68	0.00472999	3.32934e-12	-0.0299051	0.00291411	-10.2622	1.04319e-24	0.0742044	0.00472999	3.32934e-12	3.944e-21	37	4	74983237	4	75202101	F			NA	NA								TRUE				NA
cg07631435	-0.0263637	0.00669048	0.000103096	62	455	-0.0378704	0.00489181	1.60818e-14	1840	-0.0354302	0.00543901	9.58591e-11	68	0.00629611	1.83032e-08	-0.0343047	0.00334533	-10.2545	1.12969e-24	0.373062	0.00629611	1.83032e-08	4.23516e-21	37	11	114043903	11	113549113	R			NA	NA	ZBTB16;ZBTB16	NM_006006;NM_001018011	Body;Body					TRUE		11:114043274-114044099	Unclassified_Cell_type_specific	NA
cg16209444	-0.0271198	0.00573184	3.56397e-06	62	455	-0.0290216	0.00411364	2.4351e-12	1840	-0.0242144	0.00361124	2.72083e-11	68	0.00418031	6.93501e-09	-0.0267527	0.00261036	-10.2486	1.2001e-24	0.712838	0.00418031	6.93501e-09	4.4616e-21	37	3	58522771	3	58497811	R			NA	NA	ACOX2	NM_003500	5'UTR					TRUE				TRUE
cg05844798	-0.0129596	0.00560695	0.0215507	62	455	-0.033978	0.00382035	1.37611e-18	1840	-0.0253224	0.00398152	2.58238e-10	68	0.00460895	3.92537e-08	-0.0266779	0.00260465	-10.2424	1.2801e-24	0.00773493	0.00460895	3.92537e-08	4.7197e-21	37	20	3062344	20	3010344	F			NA	NA				chr20:3063005-3064146	N_Shore			TRUE				NA
cg02037794	-0.0114873	0.00387122	0.00326684	62	455	-0.0277623	0.00299036	4.44753e-20	1840	-0.015999	0.00294879	6.6007e-08	68	0.00341348	2.77237e-06	-0.019836	0.00194485	-10.1992	1.99842e-24	0.00154904	0.00341348	2.77237e-06	7.30776e-21	37	6	3750475	6	3695474	F		rs75160518	NA	NA	C6orf145	NM_183373	Body	chr6:3750788-3752767	N_Shore			NA				NA
cg18222590	-0.0276322	0.00678577	6.09193e-05	62	455	-0.0341802	0.00470251	5.34812e-13	1840	-0.0320751	0.00467158	9.20259e-12	68	0.00540775	3.00519e-09	-0.0320623	0.00314451	-10.1963	2.05978e-24	0.730135	0.00540775	3.00519e-09	7.47088e-21	37	1	204290972	1	202557595	F	rs35170796		NA	NA	PLEKHA6	NM_014935	5'UTR					TRUE				NA
cg00040575	-0.0290442	0.0068125	2.76759e-05	62	455	-0.0307484	0.00415508	2.05737e-13	1840	-0.0238108	0.0036152	5.98115e-11	68	0.0041849	1.27268e-08	-0.0275789	0.00270599	-10.1918	2.15708e-24	0.487028	0.0041849	1.27268e-08	7.76071e-21	37	22	18506180	22	16886180	R	rs13053861		NA	NA	MICAL3;MICAL3;MICAL3	NM_001122731;NM_015241;NM_001136004	5'UTR;5'UTR;5'UTR	chr22:18506419-18507412	N_Shore			NA				NA
cg12441066	-0.0213326	0.00429909	1.22139e-06	62	455	-0.0148157	0.00267526	3.49927e-08	1840	-0.0227065	0.00270752	1.03223e-16	68	0.00313418	4.33098e-13	-0.0187257	0.00183919	-10.1815	2.39882e-24	0.127647	0.00313418	4.33098e-13	8.5614e-21	37	17	55456535	17	52811534	R			NA	NA	MSI2;MSI2	NM_138962;NM_170721	Body;Body					TRUE		17:55456508-55456603	Unclassified_Cell_type_specific	NA
cg00944421	-0.0336609	0.0147526	0.0232692	62	455	-0.0546225	0.00650711	9.22115e-17	1840	-0.0426285	0.00669737	2.50174e-10	68	0.00775277	3.83069e-08	-0.0480256	0.00472197	-10.1707	2.68024e-24	0.292219	0.00775277	3.83069e-08	9.48985e-21	37	16	68269483	16	66826984	F			NA	NA	ESRP2	NM_024939	Body	chr16:68269010-68272143	Island		RDMR	NA	16:66826526-66829595			NA
cg26929272	-0.0282878	0.00765942	0.000266903	62	455	-0.0312337	0.00392464	3.0208e-15	1840	-0.0123765	0.00154328	1.94678e-15	68	0.00178647	4.27125e-12	-0.0161596	0.0015905	-10.1601	2.98881e-24	1.8982e-05	0.00178647	4.27125e-12	1.04915e-20	37	10	88295210	10	88285190	R			NA	NA				chr10:88295205-88295592	Island			TRUE	10:88285160-88285676			NA
cg25800753	-0.0148283	0.00588642	0.0123319	62	455	-0.0253806	0.00330639	2.64107e-14	1840	-0.0220626	0.00299799	2.85854e-13	68	0.00347042	2.0528e-10	-0.0225284	0.0022175	-10.1594	3.01018e-24	0.29035	0.00347042	2.0528e-10	1.04915e-20	37	10	94891725	10	94881715	R			NA	NA								TRUE				NA
cg20176142	-0.026175	0.00651051	7.50179e-05	62	455	-0.0403317	0.00487422	2.44574e-16	1840	-0.0281458	0.00512509	4.57664e-08	68	0.00593272	2.09374e-06	-0.0331027	0.00326	-10.1542	3.17351e-24	0.13332	0.00593272	2.09374e-06	1.0975e-20	37	8	81408357	8	81570912	F			NA	NA	ZBTB10;ZBTB10	NM_001105539;NM_023929	Body;Body					TRUE				NA
cg02046668	-0.0239188	0.00740064	0.00137841	62	455	-0.0299803	0.00377536	3.4577e-15	1840	-0.0192133	0.00284815	2.07374e-11	68	0.00329697	5.62463e-09	-0.0238766	0.00235432	-10.1416	3.61169e-24	0.099541	0.00329697	5.62463e-09	1.23674e-20	37	16	67258146	16	65815647	R			NA	NA	LRRC29;LRRC29	NM_012163;NM_001004055	5'UTR;5'UTR	chr16:67260744-67261155	N_Shelf			NA				NA
cg21393124	-0.0217263	0.00609375	0.000428135	62	455	-0.0375342	0.00445381	7.02238e-17	1840	-0.0230467	0.00391148	4.58225e-09	68	0.00452787	3.58135e-07	-0.0285557	0.00281585	-10.1411	3.63155e-24	0.0333683	0.00452787	3.58135e-07	1.23674e-20	37	17	48981371	17	46336370	R			NA	NA								TRUE		17:48981231-48981450	Unclassified_Cell_type_specific	NA
cg21446172	-0.0169031	0.00602474	0.00537929	62	455	-0.035288	0.00469557	8.82381e-14	1840	-0.0346843	0.00446825	1.42302e-14	68	0.00517238	2.00476e-11	-0.0304906	0.00301124	-10.1256	4.25406e-24	0.0335824	0.00517238	2.00476e-11	1.43776e-20	37	1	223745234	1	221811857	F			NA	NA	CAPN8	NM_001143962	Body	chr1:223741965-223744525	S_Shore			NA				NA
cg09354263	-0.0144898	0.00534133	0.00709151	62	455	-0.0299626	0.00384562	1.09962e-14	1840	-0.0238549	0.00325895	3.80106e-13	68	0.00377251	2.55951e-10	-0.0243449	0.00240469	-10.1239	4.32643e-24	0.0621927	0.00377251	2.55951e-10	1.45122e-20	37	17	73631460	17	71143055	F			NA	NA	RECQL5;LOC643008;LOC643008	NM_004259;NR_028439;NM_001162995	Body;TSS1500;5'UTR	chr17:73627542-73627824	S_Shelf			NA				NA
cg23005885	-0.0260758	0.00813087	0.0014991	62	455	-0.025475	0.00286589	1.43585e-18	1840	-0.0153036	0.00308389	7.653e-07	68	0.00356986	1.81193e-05	-0.021811	0.00215491	-10.1215	4.43531e-24	0.0730755	0.00356986	1.81193e-05	1.47664e-20	37	15	90543450	15	88344454	F			NA	NA	ZNF710	NM_198526	TSS1500	chr15:90543410-90543835	Island			NA	15:88344415-88345165			NA
cg01618988	-0.043346	0.0089792	2.29401e-06	62	455	-0.0437383	0.00619048	2.26319e-12	1840	-0.0434819	0.00697794	5.80809e-10	68	0.00807756	7.32308e-08	-0.0435749	0.00431035	-10.1094	5.02073e-24	0.999261	0.00807756	7.32308e-08	1.65916e-20	37	20	61635995	20	61106440	F	rs11384226		NA	NA				chr20:61636171-61639055	N_Shore			NA		20:61635724-61636621	Unclassified_Cell_type_specific	NA
cg03281572	-0.0144864	0.00409813	0.000478229	62	455	-0.0181745	0.00325574	2.72694e-08	1840	-0.020341	0.00227172	8.71142e-19	68	0.00262971	1.03251e-14	-0.0184884	0.00183036	-10.101	5.47001e-24	0.482093	0.00262971	1.03251e-14	1.79435e-20	37	10	114502318	10	114492308	F			NA	NA	VTI1A	NM_145206	Body					TRUE				NA
cg05957504	-0.021394	0.00579345	0.00026731	62	455	-0.038671	0.00509061	4.81168e-14	1840	-0.0246676	0.00352658	3.7964e-12	68	0.00408231	1.51695e-09	-0.0281168	0.00279086	-10.0746	7.15531e-24	0.0416099	0.00408231	1.51695e-09	2.33005e-20	37	5	124014639	5	124042538	F			NA	NA	ZNF608	NM_020747	Body					TRUE				NA
cg02950701	-0.016354	0.00521847	0.0019111	62	455	-0.0338693	0.00431618	7.16631e-15	1840	-0.0205585	0.00286343	1.03725e-12	68	0.00331466	5.56507e-10	-0.0236459	0.0023478	-10.0715	7.38405e-24	0.0147687	0.00331466	5.56507e-10	2.38711e-20	37	10	35656925	10	35696931	F			NA	NA	CCNY;CCNY	NM_145012;NM_181698	Body;5'UTR					TRUE				NA
cg06595162	-0.0296043	0.00764227	0.000133913	62	455	-0.0423823	0.00510033	1.83842e-16	1840	-0.0239034	0.00418179	1.2835e-08	68	0.00484077	7.89605e-07	-0.032128	0.0031905	-10.0699	7.50761e-24	0.0296303	0.00484077	7.89605e-07	2.40959e-20	37	21	40141040	21	39062910	R			NA	NA	NCRNA00114;NCRNA00114	NR_027065;NR_027066	Body;TSS200					TRUE		21:40140421-40141096	Unclassified	NA
cg08865625	-0.00741021	0.00293502	0.0121388	62	455	-0.0229696	0.00265968	1.23731e-17	1840	-0.0158283	0.00228936	6.63371e-12	68	0.00265012	2.33423e-09	-0.0159091	0.00158146	-10.0597	8.32308e-24	0.000445436	0.00265012	2.33423e-09	2.65224e-20	37	17	53345639	17	50700638	R			NA	NA	HLF	NM_002126	Body	chr17:53342198-53343061	S_Shelf			NA				NA
cg07990556	-0.0146014	0.0061714	0.0186736	62	455	-0.0305487	0.00383647	2.91944e-15	1840	-0.0250478	0.00358324	3.91633e-12	68	0.0041479	1.55384e-09	-0.0257008	0.00256225	-10.0306	1.11883e-23	0.0882023	0.0041479	1.55384e-09	3.53999e-20	37	4	159792176	4	160011626	F			NA	NA	FNIP2	NM_020840	Body					TRUE				NA
cg01431482	-0.0426388	0.00799825	2.03329e-07	62	455	-0.0401141	0.00660231	1.496e-09	1840	-0.0368419	0.00534573	7.7136e-12	68	0.00618813	2.62245e-09	-0.0394032	0.0039318	-10.0217	1.2242e-23	0.840902	0.00618813	2.62245e-09	3.8461e-20	37	1	2989085	1	2978945	R			NA	NA	PRDM16;PRDM16	NM_022114;NM_199454	Body;Body	chr1:2990030-2990718	N_Shore			NA				NA
cg09635866	-0.0228504	0.00883933	0.010249	62	455	-0.0286929	0.00407503	2.68229e-12	1840	-0.032276	0.00415283	1.32186e-14	68	0.00480724	1.89319e-11	-0.0293832	0.00293244	-10.0201	1.24437e-23	0.625933	0.00480724	1.89319e-11	3.88212e-20	37	16	85519243	16	84076744	R			NA	NA				chr16:85519109-85519357	Island			NA	16:84076562-84076810			NA
cg14987431	-0.0210929	0.00515019	5.53847e-05	62	455	-0.0168983	0.00195776	1.28785e-17	1840	-0.00979041	0.00215303	5.81559e-06	68	0.00249231	8.55658e-05	-0.0147526	0.00147507	-10.0013	1.50436e-23	0.0354225	0.00249231	8.55658e-05	4.66065e-20	37	10	94455650	10	94445630	R			NA	NA				chr10:94455524-94455896	Island			NA	10:94445505-94445898			TRUE
cg20542619	-0.0365469	0.00791415	5.9491e-06	62	455	-0.0342359	0.003832	9.71597e-19	1840	-0.014952	0.00396694	0.000169359	68	0.00459206	0.00112975	-0.0275616	0.00275776	-9.99421	1.61578e-23	0.00265457	0.00459206	0.00112975	4.97132e-20	37	18	77289104	18	75390092	F	rs1804953		NA	NA	NFATC1;NFATC1;NFATC1;NFATC1	NM_172388;NM_172387;NM_172389;NM_006162	3'UTR;3'UTR;3'UTR;3'UTR	chr18:77289018-77289464	Island			NA	18:75389970-75390203	18:77288475-77289295	Gene_Associated	NA
cg13672514	-0.019383	0.00699486	0.00596755	62	455	-0.0322372	0.00432018	1.30714e-13	1840	-0.0306202	0.00424648	8.31616e-13	68	0.00491565	4.69089e-10	-0.0293808	0.0029437	-9.98089	1.84805e-23	0.280321	0.00491565	4.69089e-10	5.64699e-20	37	12	123869502	12	122435455	R			NA	NA	SETD8	NM_020382	Body	chr12:123868267-123869381	S_Shore			NA		12:123868104-123870474	Promoter_Associated	NA
cg02121447	-0.0221995	0.00700886	0.00171104	62	455	-0.0390904	0.00504479	1.52408e-14	1840	-0.0281337	0.00420324	2.94688e-11	68	0.0048656	7.37516e-09	-0.0311734	0.00313282	-9.9506	2.50655e-23	0.105798	0.0048656	7.37516e-09	7.60704e-20	37	20	44461113	20	43894520	R			NA	NA	SNX21;SNX21;SNX21;SNX21	NM_152897;NM_001042633;NM_001042632;NM_033421	TSS1500;TSS1500;TSS1500;TSS1500	chr20:44462383-44463169	N_Shore			NA				NA
cg09906145	-0.024505	0.00527653	5.28944e-06	62	455	-0.0255646	0.00360322	1.83935e-12	1840	-0.019681	0.00318825	8.3486e-10	68	0.00369066	9.67985e-08	-0.0230425	0.00231648	-9.9472	2.59391e-23	0.497492	0.00369066	9.67985e-08	7.81897e-20	37	16	67562424	16	66119925	R			NA	NA	FAM65A	NM_024519	TSS1500	chr16:67562575-67563390	N_Shore			NA		16:67562352-67563773	Unclassified	TRUE
cg15656257	-0.012212	0.00415419	0.00356336	62	455	-0.0174655	0.0025795	1.71592e-11	1840	-0.0260973	0.0031529	2.50515e-16	68	0.00364974	8.64975e-13	-0.0186783	0.00187876	-9.94181	2.73801e-23	0.0337759	0.00364974	8.64975e-13	8.19796e-20	37	12	123450216	12	122016169	F			NA	NA	ABCB9;ABCB9;ABCB9	NM_203444;NM_019624;NM_019625	5'UTR;5'UTR;5'UTR	chr12:123450868-123451207	N_Shore			NA				NA
cg21777154	-0.0144496	0.00475643	0.00261044	62	455	-0.0253185	0.003523	9.60873e-13	1840	-0.0227248	0.00305303	1.5461e-13	68	0.00353414	1.27535e-10	-0.0219593	0.00220952	-9.9385	2.83056e-23	0.178273	0.00353414	1.27535e-10	8.39311e-20	37	1	184396304	1	182662927	R			NA	NA	C1orf21	NM_030806	5'UTR					TRUE				NA
cg27565899	-0.0176701	0.00488504	0.000354051	62	455	-0.0241043	0.00359991	2.84002e-11	1840	-0.0244783	0.00325201	8.33812e-14	68	0.00376448	7.9033e-11	-0.0228216	0.00229637	-9.93814	2.84082e-23	0.488537	0.00376448	7.9033e-11	8.39311e-20	37	1	110166664	1	109968187	R			NA	NA	AMPD2;AMPD2;AMPD2	NM_139156;NM_004037;NM_203404	Body;Body;TSS1500	chr1:110162464-110162716	S_Shelf			NA		1:110166153-110166793	Promoter_Associated	NA
cg25406657	-0.00406898	0.00263275	0.123364	62	455	-0.0142624	0.00157011	2.63358e-19	1840	-0.00983247	0.00168692	6.66221e-09	68	0.00195275	4.77355e-07	-0.0110212	0.00110963	-9.93229	3.01249e-23	0.00301978	0.00195275	4.77355e-07	8.84175e-20	37	15	63342033	15	61129086	F			NA	NA	TPM1;TPM1;TPM1;TPM1;TPM1;TPM1;TPM1	NM_001018007;NM_001018020;NM_001018004;NM_001018005;NM_000366;NM_001018008;NM_001018006	Body;Body;Body;Body;Body;Body;Body	chr15:63340256-63341464	S_Shore		RDMR	TRUE				NA
cg14286292	-0.0316565	0.00724377	1.75948e-05	62	455	-0.0295993	0.00424014	4.08442e-12	1840	-0.0273957	0.00424602	1.43195e-10	68	0.00491512	2.49315e-08	-0.0291512	0.00293519	-9.93164	3.03233e-23	0.878815	0.00491512	2.49315e-08	8.84182e-20	37	9	130546644	9	129586465	F			NA	NA				chr9:130547264-130549117	N_Shore			NA				NA
cg10512089	-0.0257563	0.0069539	0.000256442	62	455	-0.0348602	0.00509508	1.06015e-11	1840	-0.0320127	0.0044248	7.00091e-13	68	0.00512207	4.10599e-10	-0.0318104	0.00320558	-9.92344	3.29198e-23	0.571834	0.00512207	4.10599e-10	9.53659e-20	37	11	57408751	11	57165327	R			NA	NA	MIR130A	NR_029673	Body					NA				TRUE
cg00245454	-0.0222054	0.00532912	4.13647e-05	62	455	-0.0335302	0.00475975	2.61929e-12	1840	-0.0269512	0.00399176	1.99433e-11	68	0.0046208	5.45777e-09	-0.0279282	0.0028151	-9.92087	3.37812e-23	0.274839	0.0046208	5.45777e-09	9.723e-20	37	4	159746160	4	159965610	R			NA	NA	FNIP2	NM_020840	Body					TRUE				NA
cg00632560	-0.0285966	0.00879674	0.0012935	62	455	-0.0409792	0.00534755	2.91505e-14	1840	-0.0301315	0.00463109	1.00809e-10	68	0.00536087	1.9027e-08	-0.0344792	0.00347759	-9.91469	3.59377e-23	0.274939	0.00536087	1.9027e-08	1.02774e-19	37	20	62675267	20	62145711	F			NA	NA				chr20:62673792-62674131	S_Shore			NA		20:62675218-62675411	Unclassified_Cell_type_specific	NA
cg17907520	-0.0142688	0.00458153	0.00203713	62	455	-0.0216948	0.00274217	4.35029e-15	1840	-0.0142422	0.00223161	2.24382e-10	68	0.00258327	3.52297e-08	-0.017245	0.00173951	-9.91369	3.62991e-23	0.110448	0.00258327	3.52297e-08	1.03146e-19	37	15	31680189	15	29467481	F			NA	NA				chr15:31683984-31685824	N_Shelf			NA				NA
cg15697019	-0.0276731	0.00611688	9.02091e-06	62	455	-0.0362225	0.00442715	5.15405e-16	1840	-0.0202882	0.00430283	2.61182e-06	68	0.00498088	4.63703e-05	-0.0288466	0.00291043	-9.91144	3.71263e-23	0.0559955	0.00498088	4.63703e-05	1.04829e-19	37	7	77357984	7	77195920	F			NA	NA	RSBN1L	NM_198467	Body					TRUE				NA
cg09814231	-0.0240172	0.00581429	4.79783e-05	62	455	-0.0274443	0.00347345	4.71478e-15	1840	-0.0169777	0.00304884	2.9762e-08	68	0.00352928	1.50527e-06	-0.0225589	0.00227774	-9.90407	3.99663e-23	0.103212	0.00352928	1.50527e-06	1.12138e-19	37	5	149157216	5	149137409	R			NA	NA	PPARGC1B	NM_133263	Body					TRUE				NA
cg24351658	-0.0182643	0.00496157	0.00027923	62	455	-0.020247	0.00288077	2.93307e-12	1840	-0.0173327	0.00250891	6.88495e-12	68	0.00290428	2.40219e-09	-0.0187236	0.00189091	-9.90189	4.08474e-23	0.771978	0.00290428	2.40219e-09	1.13894e-19	37	1	42126724	1	41899311	R			NA	NA	HIVEP3;HIVEP3	NM_024503;NM_001127714	5'UTR;5'UTR	chr1:42127380-42128632	N_Shore		RDMR	NA				NA
cg19258882	-0.0195202	0.00724231	0.00746415	62	455	-0.0292414	0.00421079	5.25226e-12	1840	-0.0317701	0.00411313	1.90401e-14	68	0.00476129	2.51331e-11	-0.0286243	0.00289187	-9.8982	4.23836e-23	0.360912	0.00476129	2.51331e-11	1.17443e-19	37	12	56472805	12	54759072	F			NA	TRUE	ERBB3;ERBB3	NM_001982;NM_001005915	TSS1500;TSS1500	chr12:56472792-56474393	Island			NA		12:56472390-56474357	Unclassified	NA
cg07262247	-0.0164593	0.00679555	0.0160767	62	455	-0.0267069	0.00321944	2.06281e-16	1840	-0.0201579	0.0034143	4.26992e-09	68	0.00395234	3.39237e-07	-0.023187	0.00234306	-9.89603	4.33111e-23	0.251213	0.00395234	3.39237e-07	1.19273e-19	37	5	131593730	5	131621629	F			NA	NA	PDLIM4;PDLIM4	NM_003687;NM_001131027	Body;Body	chr5:131593039-131593813	Island			NA	5:131620939-131621630			TRUE
cg21279874	-0.0260746	0.00731852	0.000432081	62	455	-0.0352987	0.00468766	7.89449e-14	1840	-0.0289573	0.00458121	3.30893e-10	68	0.00530314	4.7504e-08	-0.0313112	0.00316646	-9.88839	4.67484e-23	0.488557	0.00530314	4.7504e-08	1.27949e-19	37	13	113646899	13	112694900	F		rs61967108	NA	NA	MCF2L;MCF2L	NM_001112732;NM_024979	Body;Body	chr13:113648343-113649601	N_Shore			NA	13:112694690-112694901			NA
cg16970926	-0.00654466	0.00322213	0.0431968	62	455	-0.0133983	0.00159966	1.07311e-16	1840	-0.00924347	0.00149678	8.21571e-10	68	0.00173265	9.56115e-08	-0.0109061	0.00110417	-9.87722	5.22632e-23	0.0750094	0.00173265	9.56115e-08	1.4217e-19	37	12	29381810	12	29273077	F			NA	NA	FAR2	NM_018099	5'UTR					TRUE				NA
cg02412345	-0.0208677	0.00512271	6.05569e-05	62	455	-0.0359526	0.00454367	4.31179e-15	1840	-0.0204612	0.00348451	5.15883e-09	68	0.00403361	3.92256e-07	-0.0256357	0.00259931	-9.86249	6.05295e-23	0.0216262	0.00403361	3.92256e-07	1.63659e-19	37	8	21780678	8	21836624	F			NA	NA	XPO7;XPO7	NM_001100161;NM_015024	Body;Body	chr8:21776842-21777942	S_Shelf		RDMR	NA				NA
cg19368031	-0.0119025	0.00496313	0.0171403	62	455	-0.0273145	0.00318603	2.09773e-17	1840	-0.0175963	0.00296987	3.76789e-09	68	0.00343787	3.08168e-07	-0.0208425	0.0021142	-9.85832	6.30959e-23	0.0160617	0.00343787	3.08168e-07	1.6957e-19	37	10	76688843	10	76358849	F			NA	NA	MYST4	NM_012330	Body					TRUE				NA
cg07653800	-0.0246049	0.00488831	8.70367e-07	62	455	-0.02426	0.00384031	3.33181e-10	1840	-0.0235406	0.00359759	7.91806e-11	68	0.00416451	1.57973e-08	-0.0240984	0.00244474	-9.85721	6.37985e-23	0.984893	0.00416451	1.57973e-08	1.70432e-19	37	12	108678246	12	107202376	F			NA	NA								TRUE				NA
cg27174787	-0.00491677	0.00357271	0.169875	62	455	-0.0161027	0.00167956	2.81043e-21	1840	-0.00911744	0.00207579	1.1904e-05	68	0.0024029	0.000148035	-0.0126604	0.00128456	-9.85584	6.46735e-23	0.00394163	0.0024029	0.000148035	1.71741e-19	37	19	16178240	19	16039240	R			NA	NA	TPM4	NM_001145160	TSS200	chr19:16178396-16178609	N_Shore			NA	19:16039185-16039947	19:16177987-16178319	Unclassified_Cell_type_specific	TRUE
cg19726712	-0.0275804	0.00834794	0.0010796	62	455	-0.0406639	0.00631571	1.53517e-10	1840	-0.0497112	0.00615563	1.25185e-15	68	0.00712566	3.02913e-12	-0.0405022	0.00411295	-9.84749	7.02802e-23	0.130884	0.00712566	3.02913e-12	1.84699e-19	37	8	98790327	8	98859503	F			NA	NA	LAPTM4B	NM_018407	Body	chr8:98787835-98788874	S_Shore		RDMR	NA				NA
cg02416781	-0.01584	0.00578569	0.00658749	62	455	-0.0283413	0.00345044	3.98898e-16	1840	-0.0198335	0.00332173	2.86354e-09	68	0.00384518	2.49596e-07	-0.0231134	0.00234725	-9.84702	7.06041e-23	0.100076	0.00384518	2.49596e-07	1.84699e-19	37	5	82331856	5	82367612	R			NA	NA								TRUE				NA
cg11152302	-0.0209519	0.00491525	2.77621e-05	62	455	-0.0274189	0.00391721	3.58339e-12	1840	-0.0189248	0.00286288	5.10417e-11	68	0.00331402	1.12631e-08	-0.0221506	0.00224953	-9.84675	7.07952e-23	0.244669	0.00331402	1.12631e-08	1.84699e-19	37	14	24867472	14	23937312	R			NA	NA	NYNRIN	NM_025081	TSS1500	chr14:24868163-24868590	N_Shore			NA		14:24867435-24867735	Unclassified_Cell_type_specific	NA
cg24650940	-0.0236148	0.00613488	0.000147272	62	455	-0.0220878	0.00340065	1.06418e-10	1840	-0.025789	0.0035106	3.14367e-13	68	0.00406382	2.20962e-10	-0.0236126	0.00240011	-9.83811	7.71477e-23	0.783539	0.00406382	2.20962e-10	1.99664e-19	37	5	123988226	5	124016125	R			NA	NA	ZNF608	NM_020747	Body	chr5:123987398-123987748	S_Shore		RDMR	NA				NA
cg25998745	-0.0260312	0.00894928	0.00392403	62	455	-0.047477	0.00559443	4.31509e-17	1840	-0.0314559	0.00580593	6.8866e-08	68	0.00672086	2.86396e-06	-0.0381274	0.00387562	-9.83775	7.74264e-23	0.0606489	0.00672086	2.86396e-06	1.99664e-19	37	8	142028625	8	142097807	F			NA	NA								TRUE				NA
cg13617561	-0.0223612	0.00562815	9.06088e-05	62	455	-0.0323083	0.00405087	2.63871e-15	1840	-0.0200115	0.00367099	5.72963e-08	68	0.00424947	2.48734e-06	-0.0255803	0.00260037	-9.83716	7.7881e-23	0.0905811	0.00424947	2.48734e-06	1.99682e-19	37	11	67222073	11	66978649	F			NA	NA	CABP4	NM_145200	TSS1500					NA		11:67222032-67222214	Unclassified_Cell_type_specific	NA
cg05381795	-0.0244622	0.00557873	1.65179e-05	62	455	-0.0294887	0.00421778	3.79024e-12	1840	-0.0224487	0.00353574	2.76763e-10	68	0.00409292	4.14032e-08	-0.0255589	0.00259904	-9.83397	8.03858e-23	0.476114	0.00409292	4.14032e-08	2.04926e-19	37	20	62713085	20	62183529	R			NA	NA	OPRL1;OPRL1	NM_000913;NM_182647	5'UTR;5'UTR	chr20:62714763-62715761	N_Shore			NA		20:62713058-62713226	Unclassified_Cell_type_specific	NA
cg24127061	-0.0324299	0.00705802	6.59679e-06	62	455	-0.0325605	0.004962	6.88404e-11	1840	-0.0304619	0.0046248	5.96734e-11	68	0.00535359	1.27041e-08	-0.031767	0.00323458	-9.82107	9.13708e-23	0.954174	0.00535359	1.27041e-08	2.31607e-19	37	11	65839402	11	65595978	F			NA	NA	PACS1	NM_018026	Body	chr11:65837254-65838649	S_Shore			NA		11:65838994-65839470	Unclassified	NA
cg23887948	-0.0173119	0.00669036	0.0101764	62	455	-0.0285145	0.00340405	1.06548e-16	1840	-0.0181093	0.00315727	1.1454e-08	68	0.0036548	7.23559e-07	-0.0229056	0.00233441	-9.81217	9.97986e-23	0.0766823	0.0036548	7.23559e-07	2.51541e-19	37	15	74494854	15	72281907	F			NA	NA	STRA6;STRA6;STRA6;STRA6;STRA6	NM_001142617;NM_001142618;NM_001142619;NM_022369;NM_001142620	5'UTR;5'UTR;5'UTR;5'UTR;5'UTR			low-CpG:72281833-72282584		TRUE				TRUE
cg08075452	-0.0230788	0.00772665	0.00307132	62	455	-0.0338587	0.00512763	5.24966e-11	1840	-0.0366655	0.00467692	7.87664e-15	68	0.00541392	1.2663e-11	-0.0329048	0.00335387	-9.81098	1.00983e-22	0.343979	0.00541392	1.2663e-11	2.53095e-19	37	3	184056843	3	185539537	R			NA	NA	FAM131A;FAM131A	NM_001171093;NM_144635	5'UTR;Body	chr3:184056419-184056671	S_Shore			NA				NA
cg12727256	-0.0175197	0.00538719	0.00128787	62	455	-0.0323755	0.00376224	1.60282e-17	1840	-0.0176868	0.00336734	1.68843e-07	68	0.00389798	5.69435e-06	-0.0237246	0.00241882	-9.80835	1.03647e-22	0.0110366	0.00389798	5.69435e-06	2.58323e-19	37	22	24838292	22	23168292	F			NA	NA	C22orf45;ADORA2A;C22orf45	NR_028484;NM_000675;NR_028483	Body;3'UTR;Body					NA				NA
cg10724867	-0.0259512	0.0109883	0.0188857	62	455	-0.0475593	0.00534728	1.37435e-18	1840	-0.0341856	0.00750374	5.5872e-06	68	0.0086862	8.29821e-05	-0.0412557	0.0042067	-9.80714	1.049e-22	0.135873	0.0086862	8.29821e-05	2.59992e-19	37	7	27218867	7	27185392	R			NA	NA	HOXA10	NM_153715	Body	chr7:27219309-27219750	N_Shore			NA	7:27185284-27185393	7:27218624-27220804	Unclassified	NA
cg25966016	-0.0294357	0.00683669	2.31671e-05	62	455	-0.0315732	0.00485393	1.00063e-10	1840	-0.0271021	0.00391659	6.36719e-12	68	0.00453378	2.26149e-09	-0.029233	0.00298158	-9.80451	1.07665e-22	0.796827	0.00453378	2.26149e-09	2.6537e-19	37	10	134353618	10	134203608	F			NA	NA	INPP5A	NM_005539	Body	chr10:134350302-134351119	S_Shelf			TRUE		10:134352924-134353672	Promoter_Associated_Cell_type_specific	TRUE
cg10375267	-0.0257513	0.00691774	0.000239079	62	455	-0.0303409	0.00498092	1.35927e-09	1840	-0.0337822	0.00431337	8.35675e-15	68	0.00499309	1.32587e-11	-0.0307567	0.0031417	-9.78983	1.24511e-22	0.638372	0.00499309	1.32587e-11	3.05205e-19	37	16	87523700	16	86081201	R			NA	NA	ZCCHC14	NM_015144	Body				RDMR	NA		16:87523618-87524798	Unclassified_Cell_type_specific	NA
cg18917643	-0.0143006	0.00588476	0.0157319	62	455	-0.0401055	0.00536608	1.19727e-13	1840	-0.0374113	0.00475184	6.09277e-15	68	0.00550065	1.03721e-11	-0.0314749	0.00321653	-9.78533	1.3017e-22	0.00216702	0.00550065	1.03721e-11	3.17333e-19	37	5	39476124	5	39511881	F			NA	NA								TRUE				NA
cg03985415	-0.0248319	0.00545783	8.05378e-06	62	455	-0.0269782	0.00397219	1.48998e-11	1840	-0.0207403	0.00326661	2.7656e-10	68	0.00378138	4.13799e-08	-0.0239324	0.00244789	-9.77675	1.4169e-22	0.514856	0.00378138	4.13799e-08	3.42488e-19	37	1	229340974	1	227407597	R			NA	NA								TRUE		1:229340687-229341089	Unclassified_Cell_type_specific	NA
cg07342322	-0.0379809	0.00749928	7.49541e-07	62	455	-0.0345806	0.00466492	1.87474e-13	1840	-0.0297856	0.00651859	5.24272e-06	68	0.00754581	7.90377e-05	-0.0342884	0.00350723	-9.77651	1.42024e-22	0.739909	0.00754581	7.90377e-05	3.42488e-19	37	1	192508724	1	190775347	R			NA	NA								TRUE				NA
cg01635555	-0.0446791	0.0108053	4.71564e-05	62	455	-0.0440358	0.00564417	1.01354e-14	1840	-0.0349568	0.00702271	7.08222e-07	68	0.00812937	1.70753e-05	-0.0416419	0.00426064	-9.77364	1.46102e-22	0.626522	0.00812937	1.70753e-05	3.50429e-19	37	16	73101264	16	71658765	R			NA	NA				chr16:73099812-73100791	S_Shore		RDMR	NA				NA
cg15763258	-0.0211461	0.00623044	0.000789821	62	455	-0.0289938	0.00418771	6.06357e-12	1840	-0.0266131	0.00377465	2.57603e-12	68	0.00436947	1.12424e-09	-0.0265755	0.00272004	-9.77028	1.51036e-22	0.578988	0.00436947	1.12424e-09	3.60326e-19	37	11	128561675	11	128066885	F			NA	NA	FLI1	NM_001167681	TSS1500	chr11:128562671-128565011	N_Shore		RDMR	NA		11:128561561-128562410	Unclassified	NA
cg07064364	-0.00850316	0.00262672	0.00135452	62	455	-0.0109282	0.00136452	2.03404e-15	1840	-0.0131637	0.00241956	6.07941e-08	68	0.00280084	2.60293e-06	-0.010846	0.00111146	-9.75838	1.69853e-22	0.476185	0.00280084	2.60293e-06	4.03063e-19	37	22	38009253	22	36339199	F			NA	NA	GGA1;GGA1;GGA1	NM_001001560;NM_013365;NM_001001561	Body;Body;Body	chr22:38004443-38005271	S_Shelf			NA				NA
cg16630369	-0.0135056	0.00649847	0.0386083	62	455	-0.0321108	0.00395719	8.82114e-16	1840	-0.0260885	0.00404546	1.46235e-10	68	0.00468296	2.53381e-08	-0.0267391	0.00274061	-9.75661	1.7283e-22	0.0495654	0.00468296	2.53381e-08	4.07957e-19	37	5	66307391	5	66343147	R			NA	NA	MAST4;MAST4	NM_015183;NM_001164664	Body;Body					TRUE				NA
cg21500300	-0.0166675	0.00747778	0.0266237	62	455	-0.0424831	0.00530924	2.15073e-15	1840	-0.0397577	0.00583652	1.32915e-11	68	0.00675626	3.99097e-09	-0.035556	0.00364501	-9.75471	1.76096e-22	0.0144831	0.00675626	3.99097e-09	4.13478e-19	37	12	25102521	12	24993788	R			NA	NA	BCAT1	NM_005504	TSS1500	chr12:25101607-25102073	S_Shore			NA				NA
cg18454133	-0.0381355	0.00685739	6.32443e-08	62	455	-0.0173746	0.00231252	8.94795e-14	1840	-0.0121632	0.00232518	1.89262e-07	68	0.00269159	6.21483e-06	-0.0165722	0.00169933	-9.75221	1.805e-22	0.00175393	0.00269159	6.21483e-06	4.216e-19	37	14	23835870	14	22905710	F			NA	NA	EFS;EFS	NM_032459;NM_005864	TSS1500;TSS1500	chr14:23834435-23835947	Island			NA	14:22904057-22905751			NA
cg15488143	-0.00923653	0.00310687	0.00321004	62	455	-0.0277141	0.00274766	2.52917e-23	1840	-0.0083425	0.0015697	1.20836e-07	68	0.00181706	4.40678e-06	-0.0132755	0.00136218	-9.74577	1.92314e-22	1.08723e-08	0.00181706	4.40678e-06	4.46856e-19	37	7	128924101	7	128711337	F	rs35183043		NA	NA	AHCYL2;AHCYL2	NM_001130720;NM_015328	Body;Body					TRUE				NA
cg13269964	-0.014561	0.00533142	0.00671753	62	455	-0.0268506	0.00339092	4.12515e-15	1840	-0.0178061	0.00282036	3.46909e-10	68	0.0032648	4.92634e-08	-0.0209196	0.00215181	-9.72184	2.43333e-22	0.0675026	0.0032648	4.92634e-08	5.62471e-19	37	17	41924577	17	39280103	F			NA	TRUE	CD300LG;CD300LG;CD300LG;CD300LG;CD300LG;CD300LG;CD300LG;CD300LG	NM_001168323;NM_001168324;NM_001168324;NM_145273;NM_145273;NM_001168322;NM_001168323;NM_001168322	5'UTR;5'UTR;1stExon;1stExon;5'UTR;5'UTR;1stExon;1stExon					TRUE				NA
cg00237876	-0.0305965	0.00731359	3.86055e-05	62	455	-0.0434096	0.00577853	9.01765e-14	1840	-0.0281055	0.00491064	1.23023e-08	68	0.00568448	7.64338e-07	-0.0344492	0.00354462	-9.71873	2.509e-22	0.140342	0.00568448	7.64338e-07	5.76973e-19	37	17	41924043	17	39279569	F	rs76381914	rs71382999	NA	NA	CD300LG;CD300LG;CD300LG;CD300LG	NM_001168323;NM_001168322;NM_001168324;NM_145273	TSS1500;TSS1500;TSS1500;TSS1500					TRUE		17:41923523-41924572	Unclassified	NA
cg13982037	-0.0182446	0.00603287	0.00272755	62	455	-0.0416389	0.00499988	1.58483e-16	1840	-0.0264521	0.00453354	6.42775e-09	68	0.00524796	4.64405e-07	-0.0301326	0.00310405	-9.70754	2.80027e-22	0.00794331	0.00524796	4.64405e-07	6.4065e-19	37	6	119862526	6	119904225	F			NA	NA								TRUE				NA
cg13740709	-0.0253745	0.00721923	0.000514095	62	455	-0.0347949	0.00439122	3.95656e-15	1840	-0.0225397	0.00406678	3.44882e-08	68	0.00470764	1.6854e-06	-0.0284788	0.00293396	-9.70661	2.82576e-22	0.146216	0.00470764	1.6854e-06	6.42878e-19	37	3	128712555	3	130195245	R			NA	NA	KIAA1257	NM_020741	5'UTR	chr3:128712404-128713058	Island			TRUE	3:130194750-130196024	3:128712039-128713654	Unclassified	NA
cg05813673	-0.014928	0.00553391	0.00741527	62	455	-0.0337064	0.00415947	9.62828e-16	1840	-0.0252468	0.00407055	6.95926e-10	68	0.004712	8.4156e-08	-0.0263687	0.0027167	-9.70614	2.83882e-22	0.0242002	0.004712	8.4156e-08	6.42878e-19	37	4	53862521	4	53557278	R			NA	NA	SCFD2	NM_152540	Body					TRUE				NA
cg26963277	-0.0280724	0.00675835	4.36539e-05	62	455	-0.0274193	0.003402	1.36208e-15	1840	-0.0169162	0.00363236	3.45438e-06	68	0.00420476	5.74346e-05	-0.0239025	0.00246289	-9.70506	2.86895e-22	0.12185	0.00420476	5.74346e-05	6.4642e-19	37	11	2722407	11	2678983	R			NA	NA	KCNQ1OT1;KCNQ1;KCNQ1	NR_002728;NM_000218;NM_181798	TSS1500;Body;Body	chr11:2720410-2722087	S_Shore			NA				NA
cg27059698	-0.0167444	0.00645736	0.0100197	62	455	-0.0301171	0.00404638	1.50358e-13	1840	-0.0307058	0.00444663	7.02856e-12	68	0.00514734	2.44078e-09	-0.0276864	0.00285365	-9.70212	2.95297e-22	0.167269	0.00514734	2.44078e-09	6.62006e-19	37	17	17625521	17	17566246	R			NA	NA	RAI1	NM_030665	5'UTR	chr17:17625605-17628500	N_Shore		RDMR	TRUE				NA
cg25930644	-0.0172777	0.00408493	3.18772e-05	62	455	-0.0226071	0.0030913	3.8762e-13	1840	-0.0163443	0.00282859	8.94775e-09	68	0.00327433	5.98643e-07	-0.0191029	0.00196934	-9.70018	3.00967e-22	0.333805	0.00327433	5.98643e-07	6.71344e-19	37	17	8531915	17	8472640	R			NA	NA	MYH10	NM_005964	5'UTR	chr17:8533004-8534933	N_Shore			NA		17:8531773-8532000	Unclassified_Cell_type_specific	NA
cg10179300	-0.0174937	0.00648439	0.00740933	62	455	-0.0444756	0.00540272	3.44411e-16	1840	-0.0335858	0.00536901	4.99393e-10	68	0.00621508	6.51998e-08	-0.033471	0.00345176	-9.69678	3.11159e-22	0.00603517	0.00621508	6.51998e-08	6.90625e-19	37	5	14147618	5	14200618	F			NA	NA	TRIO	NM_007118	Body	chr5:14143017-14145350	S_Shelf			NA		5:14147527-14147710	Unclassified_Cell_type_specific	NA
cg11205173	-0.0242939	0.00585002	4.38219e-05	62	455	-0.0280413	0.0039919	3.01153e-12	1840	-0.0247316	0.00405242	1.28513e-09	68	0.00469102	1.34858e-07	-0.02615	0.00269761	-9.69375	3.20548e-22	0.811977	0.00469102	1.34858e-07	7.06771e-19	37	4	1775077	4	1744875	R			NA	NA				chr4:1772006-1772265	S_Shelf			NA		4:1774570-1775219	Unclassified_Cell_type_specific	NA
cg00285294	-0.0232874	0.00455851	6.06515e-07	62	455	-0.025794	0.00380491	1.62294e-11	1840	-0.0177873	0.00311407	1.31443e-08	68	0.00360479	8.04165e-07	-0.0219991	0.00226949	-9.69341	3.21602e-22	0.29527	0.00360479	8.04165e-07	7.06771e-19	37	7	1089767	7	1056293	R			NA	NA	C7orf50;C7orf50;C7orf50	NM_001134395;NM_032350;NM_001134396	Body;Body;Body	chr7:1090177-1090517	N_Shore			NA				NA
cg03159409	-0.0327983	0.00979602	0.000926744	62	455	-0.037139	0.00453308	4.7195e-16	1840	-0.0438673	0.00945142	3.72483e-06	68	0.0109408	6.08453e-05	-0.0373018	0.00385073	-9.68694	3.42647e-22	0.750983	0.0109408	6.08453e-05	7.46405e-19	37	12	124779144	12	123345097	R			NA	NA	FAM101A	NM_181709	5'UTR	chr12:124780105-124780306	N_Shore			NA	12:123345091-123345182			NA
cg02923856	-0.025075	0.00400205	1.4216e-09	62	455	-0.0273182	0.00400559	1.23062e-11	1840	-0.0125365	0.00242373	2.58215e-07	68	0.00280567	7.88472e-06	-0.0193044	0.00199285	-9.68684	3.42983e-22	0.00260517	0.00280567	7.88472e-06	7.46405e-19	37	3	23989124	3	23964128	R			NA	NA	NR1D2;NR1D2	NM_001145425;NM_005126	5'UTR;Body	chr3:23986693-23988021	S_Shore			NA				TRUE
cg03450842	-0.0343807	0.00640196	1.6699e-07	62	455	-0.0310889	0.00509576	1.28242e-09	1840	-0.0261785	0.00421315	6.49037e-10	68	0.00487707	7.97608e-08	-0.0298872	0.00308678	-9.68232	3.58504e-22	0.569347	0.00487707	7.97608e-08	7.76396e-19	37	10	80834947	10	80504953	F	rs7082178		NA	NA	ZMIZ1	NM_020338	5'UTR					TRUE				NA
cg19126615	-0.0222709	0.00631598	0.000493597	62	455	-0.0289788	0.00394322	2.98821e-13	1840	-0.0219702	0.00352476	5.74402e-10	68	0.0040802	7.26087e-08	-0.0250367	0.00258675	-9.6788	3.71033e-22	0.415614	0.0040802	7.26087e-08	7.99648e-19	37	11	47290188	11	47246764	F	rs1050945	rs61896016	NA	NA	MADD;MADD;NR1H3;MADD;MADD;MADD;NR1H3;MADD;NR1H3;MADD;MADD;MADD;MADD	NM_130472;NM_130475;NM_005693;NM_001135943;NM_130471;NM_130474;NM_001130102;NM_130473;NM_001130101;NM_003682;NM_130476;NM_130470;NM_001135944	TSS1500;TSS1500;Body;TSS1500;TSS1500;TSS1500;Body;TSS1500;Body;TSS1500;TSS1500;TSS1500;TSS1500	chr11:47291200-47291858	N_Shore		CDMR	NA		11:47290158-47291841	Promoter_Associated	NA
cg00533891	-0.0386091	0.00944733	5.7397e-05	62	455	-0.0454662	0.00633046	9.92301e-13	1840	-0.0370363	0.00625098	3.76962e-09	68	0.00723603	3.08276e-07	-0.0411621	0.00425412	-9.67581	3.82043e-22	0.650381	0.00723603	3.08276e-07	8.19419e-19	37	10	80919242	10	80589248	R		rs58124651	NA	NA	ZMIZ1	NM_020338	5'UTR					TRUE				TRUE
cg18389639	-0.043024	0.00791497	1.20058e-07	62	455	-0.0346448	0.00505423	9.72369e-12	1840	-0.0244691	0.0045792	1.03382e-07	68	0.00530081	3.91022e-06	-0.0321267	0.00332049	-9.67528	3.8402e-22	0.12059	0.00530081	3.91022e-06	8.19718e-19	37	10	97049610	10	97039600	F	rs7096604		NA	NA	PDLIM1	NM_020992	Body	chr10:97050185-97051124	N_Shore		RDMR	NA		10:97049162-97050211	Unclassified_Cell_type_specific	NA
cg06925984	-0.0256581	0.00854672	0.00292678	62	455	-0.0261187	0.00388515	2.37216e-11	1840	-0.0345077	0.00465348	1.89666e-13	68	0.00538679	1.4941e-10	-0.0285907	0.00295654	-9.67031	4.03164e-22	0.421242	0.00538679	1.4941e-10	8.56483e-19	37	17	77767242	17	75381837	F			NA	NA				chr17:77763364-77767356	Island			NA	17:75381777-75382150			NA
cg02727079	-0.0381383	0.00968773	0.000104622	62	455	-0.054179	0.00776863	4.27755e-12	1840	-0.0450305	0.00697336	1.38271e-10	68	0.00807225	2.42688e-08	-0.0468663	0.00484666	-9.66981	4.05121e-22	0.416972	0.00807225	2.42688e-08	8.56563e-19	37	6	17986167	6	18094146	R			NA	NA	KIF13A;KIF13A;KIF13A;KIF13A	NM_022113;NM_001105567;NM_001105568;NM_001105566	Body;Body;Body;Body	chr6:17987415-17988405	N_Shore			NA				NA
cg05708512	-0.0308675	0.00660868	4.69244e-06	62	455	-0.0344602	0.00511861	2.22404e-11	1840	-0.032994	0.00553687	3.07492e-09	68	0.00640939	2.63631e-07	-0.0330791	0.00342179	-9.66719	4.15642e-22	0.911666	0.00640939	2.63631e-07	8.74662e-19	37	5	31731391	5	31767148	R			NA	NA								TRUE				NA
cg04890480	-0.0276177	0.00621986	1.30095e-05	62	455	-0.029719	0.00449158	4.80508e-11	1840	-0.0257049	0.00403293	2.36553e-10	68	0.00466846	3.66914e-08	-0.0277528	0.00287124	-9.66579	4.21342e-22	0.825091	0.00466846	3.66914e-08	8.82494e-19	37	1	181073734	1	179340357	R			NA	NA				chr1:181073917-181075002	N_Shore			NA				NA
cg03772384	-0.0255089	0.00481475	2.3957e-07	62	455	-0.023505	0.00400813	5.3339e-09	1840	-0.0192711	0.00294083	7.44127e-11	68	0.00340426	1.50593e-08	-0.02205	0.00228413	-9.65357	4.7475e-22	0.51835	0.00340426	1.50593e-08	9.89709e-19	37	3	12851369	3	12826369	R			NA	NA	CAND2;CAND2	NM_001162499;NM_012298	Body;Body	chr3:12851516-12851823	N_Shore			TRUE		3:12851281-12852840	Promoter_Associated	NA
cg19351603	-0.024298	0.00682398	0.000435467	62	455	-0.0321445	0.00424546	5.8016e-14	1840	-0.0197718	0.00323288	1.1871e-09	68	0.00374233	1.26879e-07	-0.025054	0.00259623	-9.65015	4.9082e-22	0.0909972	0.00374233	1.26879e-07	1.01845e-18	37	19	45943663	19	50635503	R			NA	NA				chr19:45942865-45943396	S_Shore			NA		19:45942731-45943768	Promoter_Associated	NA
cg13732465	-0.0221409	0.00641478	0.000644736	62	455	-0.0296396	0.00450411	6.09255e-11	1840	-0.0262342	0.00364329	8.9313e-13	68	0.00421741	4.95708e-10	-0.026761	0.00277546	-9.64201	5.31382e-22	0.624131	0.00421741	4.95708e-10	1.09751e-18	37	9	139549756	9	138669577	F			NA	NA				chr9:139551254-139551559	N_Shore			NA				NA
cg06084210	-0.0182371	0.00653215	0.0056061	62	455	-0.0328209	0.00424429	1.71774e-14	1840	-0.0271166	0.00436014	6.2651e-10	68	0.00504723	7.76232e-08	-0.028035	0.00290861	-9.63863	5.4915e-22	0.169105	0.00504723	7.76232e-08	1.12898e-18	37	13	103754324	13	102552325	F			NA	NA								TRUE				NA
cg09244707	-0.0217858	0.00655347	0.00100628	62	455	-0.0325013	0.00447553	5.60385e-13	1840	-0.0299075	0.00464566	1.5705e-10	68	0.00537774	2.67688e-08	-0.0293545	0.00304592	-9.63731	5.56286e-22	0.398758	0.00537774	2.67688e-08	1.13841e-18	37	7	2756996	7	2723522	R			NA	NA				chr7:2758004-2758257	N_Shore			TRUE	7:2722946-2723939	7:2756836-2757919	Unclassified_Cell_type_specific	NA
cg15338967	-0.0247989	0.00556887	1.23017e-05	62	455	-0.0302348	0.00440015	8.67581e-12	1840	-0.0228105	0.00377193	1.8027e-09	68	0.00436632	1.74916e-07	-0.0260931	0.00270817	-9.63496	5.69155e-22	0.471139	0.00436632	1.74916e-07	1.15943e-18	37	13	49175326	13	48073327	F			NA	NA								TRUE				NA
cg23242489	-0.0230782	0.00526479	1.66185e-05	62	455	-0.0280257	0.00358915	9.64541e-15	1840	-0.0174214	0.00374461	3.53313e-06	68	0.0043347	5.8434e-05	-0.0235754	0.00244759	-9.63211	5.85127e-22	0.168477	0.0043347	5.8434e-05	1.1835e-18	37	7	1084791	7	1051317	R			NA	NA	C7orf50;C7orf50;C7orf50	NM_001134395;NM_032350;NM_001134396	Body;Body;Body	chr7:1084387-1084595	S_Shore			NA		7:1083296-1085050	Promoter_Associated	NA
cg24427724	-0.020331	0.00637239	0.00158426	62	455	-0.0298417	0.00403968	2.26354e-13	1840	-0.0251627	0.00398668	3.50664e-10	68	0.00461492	4.96732e-08	-0.0264252	0.00274351	-9.63191	5.86276e-22	0.426417	0.00461492	4.96732e-08	1.1835e-18	37	12	6234257	12	6104518	F		rs61750447	NA	NA	VWF	NM_000552	TSS1500					NA				NA
cg19254163	-0.027986	0.00714041	0.000112028	62	455	-0.0359774	0.0046235	1.18663e-14	1840	-0.0245571	0.00480594	3.58669e-07	68	0.00556328	1.01414e-05	-0.030651	0.00318298	-9.62966	5.99303e-22	0.263644	0.00556328	1.01414e-05	1.20434e-18	37	11	60623782	11	60380358	R			NA	NA	GPR44	NM_004778	TSS1500	chr11:60619924-60621111	S_Shelf			TRUE				NA
cg19458020	-0.00651832	0.00667249	0.329477	62	455	-0.022453	0.00287318	9.19466e-15	1840	-0.0228486	0.00330201	6.37651e-12	68	0.00382236	2.26405e-09	-0.0208928	0.00217165	-9.6207	6.53828e-22	0.0743606	0.00382236	2.26405e-09	1.30802e-18	37	17	38473119	17	35726645	R			NA	NA	RARA;RARA;RARA	NM_001145302;NM_000964;NM_001145301	TSS1500;5'UTR;TSS1500	chr17:38472958-38473201	Island			TRUE	17:35726539-35726727	17:38472852-38476047	Promoter_Associated	NA
cg26575622	-0.015133	0.00436583	0.000611913	62	455	-0.0239745	0.00311002	2.06372e-14	1840	-0.0212516	0.00376215	1.88832e-08	68	0.00435501	1.06184e-06	-0.0210623	0.0021896	-9.61924	6.63169e-22	0.256248	0.00435501	1.06184e-06	1.32079e-18	37	10	77872458	10	77542464	F		rs67299678	NA	NA	C10orf11	NM_032024	Body	chr10:77872083-77872305	S_Shore			TRUE				NA
cg07250214	-0.0258133	0.00880959	0.00367135	62	455	-0.0417418	0.00599877	4.76817e-12	1840	-0.0392336	0.00551143	1.59771e-12	68	0.00637994	7.77198e-10	-0.0376514	0.00391504	-9.61713	6.76931e-22	0.311583	0.00637994	7.77198e-10	1.3422e-18	37	17	77763166	17	75377761	F	rs79934344		NA	NA				chr17:77763364-77767356	N_Shore		RDMR	NA				NA
cg25268718	-0.0362859	0.0067318	1.51114e-07	62	455	-0.0274401	0.0044586	9.22628e-10	1840	-0.0237893	0.00389479	1.24591e-09	68	0.00450855	1.31684e-07	-0.0275683	0.00286809	-9.61208	7.10983e-22	0.304165	0.00450855	1.31684e-07	1.40348e-18	37	14	24604711	14	23674551	F			NA	TRUE	PSME1;PSME1	NM_006263;NM_176783	TSS1500;TSS1500	chr14:24605082-24605760	N_Shore			NA				NA
cg20822990	-0.00944595	0.00463038	0.0423028	62	455	-0.0262856	0.00348219	6.88271e-14	1840	-0.0213025	0.00292541	4.99555e-13	68	0.00338641	3.16235e-10	-0.0206459	0.00215011	-9.60225	7.82209e-22	0.0141842	0.00338641	3.16235e-10	1.53728e-18	37	1	17338766	1	17211353	R			NA	NA	ATP13A2;ATP13A2;ATP13A2	NM_022089;NM_001141974;NM_001141973	TSS1500;TSS1500;TSS1500	chr1:17337829-17338590	S_Shore			TRUE		1:17336920-17338827	Promoter_Associated	NA
cg26403171	-0.0294846	0.00854939	0.000651175	62	455	-0.0390198	0.00548933	1.67407e-12	1840	-0.0352025	0.00549793	1.9642e-10	68	0.00636431	3.17993e-08	-0.0358796	0.00373831	-9.59782	8.16565e-22	0.638245	0.00636431	3.17993e-08	1.59776e-18	37	5	148507714	5	148487907	R			NA	NA								TRUE		5:148507442-148508522	Unclassified	TRUE
cg15961693	-0.0236441	0.00551842	2.53115e-05	62	455	-0.0260402	0.00316006	3.22083e-16	1840	-0.0135916	0.00336867	5.70785e-05	68	0.00389952	0.000491314	-0.0215251	0.00224314	-9.59595	8.31459e-22	0.0422551	0.00389952	0.000491314	1.6198e-18	37	6	139689053	6	139730746	R			NA	NA								TRUE				NA
cg21097733	-0.0177119	0.00708779	0.0130385	62	455	-0.0279544	0.00392519	1.52193e-12	1840	-0.0225961	0.00321075	2.81776e-12	68	0.00371671	1.20492e-09	-0.0241899	0.00252216	-9.59098	8.72509e-22	0.379264	0.00371671	1.20492e-09	1.69238e-18	37	17	46623729	17	43978728	F			NA	NA	HOXB2	NM_002145	TSS1500	chr17:46620367-46621373	S_Shelf			NA				NA
cg22075924	-0.0213029	0.0055044	0.000135796	62	455	-0.021793	0.00376543	8.37197e-09	1840	-0.0247001	0.0032237	3.04305e-14	68	0.0037317	3.61656e-11	-0.0228913	0.0023881	-9.58556	9.19591e-22	0.817385	0.0037317	3.61656e-11	1.77599e-18	37	1	78005352	1	77777940	F			NA	NA	AK5;AK5	NM_174858;NM_012093	Body;Body					TRUE				TRUE
cg06804344	-0.0433966	0.0102871	3.33835e-05	62	455	-0.0535962	0.00707111	5.4609e-14	1840	-0.0352969	0.00688698	3.30915e-07	68	0.00797225	9.53471e-06	-0.0450908	0.00470448	-9.58466	9.2765e-22	0.225016	0.00797225	9.53471e-06	1.78383e-18	37	3	128778699	3	130261389	F			NA	NA	GP9	NM_000174	TSS1500					NA				NA
cg03653817	-0.0242287	0.00735665	0.00111879	62	455	-0.0356121	0.00496304	1.04038e-12	1840	-0.030806	0.00476533	1.32088e-10	68	0.00551627	2.34288e-08	-0.0316064	0.00329801	-9.58349	9.38185e-22	0.432096	0.00551627	2.34288e-08	1.79634e-18	37	1	181065498	1	179332121	F	rs73054329		NA	NA								TRUE				TRUE
cg27554551	-0.0245393	0.00587132	3.92496e-05	62	455	-0.0296043	0.00403233	3.15027e-13	1840	-0.021573	0.00395368	5.56793e-08	68	0.00457671	2.43334e-06	-0.0257681	0.00268946	-9.58116	9.59597e-22	0.408792	0.00457671	2.43334e-06	1.82949e-18	37	16	4421486	16	4361487	F			NA	NA	VASN;CORO7	NM_138440;NM_024535	TSS1500;Body	chr16:4421642-4422240	N_Shore			NA		16:4421216-4422699	Unclassified_Cell_type_specific	NA
cg08396193	-0.0274338	0.00525647	3.54e-07	62	455	-0.0224059	0.00587045	0.000139703	1840	-0.0290413	0.00352431	3.37484e-16	68	0.00407969	1.09113e-12	-0.0270402	0.00282514	-9.57129	1.05581e-21	0.647466	0.00407969	1.09113e-12	2.00436e-18	37	7	27193709	7	27160234	F			NA	NA	HOXA7	NM_006896	3'UTR	chr7:27194583-27194827	N_Shore		CDMR	NA		7:27193699-27194198	Unclassified_Cell_type_specific	NA
cg14507146	-0.0193587	0.00438933	1.4802e-05	62	455	-0.0283684	0.00338915	1.1215e-16	1840	-0.0125498	0.00306785	4.49918e-05	68	0.0035513	0.000409509	-0.0204789	0.00214051	-9.56732	1.09713e-21	0.00532898	0.0035513	0.000409509	2.07397e-18	37	5	34043333	5	34079090	F			NA	NA	C1QTNF3;C1QTNF3	NM_181435;NM_030945	TSS200;TSS200					NA				NA
cg02355304	-0.0407245	0.0087758	5.37563e-06	62	455	-0.0408125	0.00596955	1.0981e-11	1840	-0.0372475	0.00665296	2.51166e-08	68	0.00770135	1.32157e-06	-0.0397547	0.00415562	-9.56651	1.10576e-21	0.92793	0.00770135	1.32157e-06	2.08146e-18	37	7	5536984	7	5503510	R			NA	NA	MIR589;FBXL18	NR_030318;NM_024963	TSS1500;Body	chr7:5539957-5541567	N_Shelf			NA	7:5503439-5503563	7:5536936-5537515	Unclassified_Cell_type_specific	NA
cg26803969	-0.0103613	0.00483397	0.0329522	62	455	-0.0191281	0.00247058	1.59903e-14	1840	-0.0160811	0.00255274	3.78592e-10	68	0.00295501	5.26898e-08	-0.0168733	0.0017646	-9.56211	1.15375e-21	0.256716	0.00295501	5.26898e-08	2.16268e-18	37	2	28579423	2	28432927	F			NA	NA								TRUE		2:28579219-28579467	Unclassified_Cell_type_specific	TRUE
cg11291003	-0.0517668	0.0105427	1.55971e-06	62	455	-0.0245596	0.00337609	5.11987e-13	1840	-0.0294852	0.00563714	1.89797e-07	68	0.00652546	6.2283e-06	-0.027558	0.00288416	-9.55496	1.23636e-21	0.0462177	0.00652546	6.2283e-06	2.30783e-18	37	5	134526241	5	134554140	F			NA	NA				chr5:134526927-134527419	N_Shore		CDMR	NA	5:134554072-134554208			NA
cg10646145	-0.0222403	0.00796747	0.00561469	62	455	-0.0368812	0.00495366	1.47854e-13	1840	-0.0276543	0.00429787	1.60437e-10	68	0.00497514	2.72122e-08	-0.0306544	0.00321237	-9.54261	1.39282e-21	0.216644	0.00497514	2.72122e-08	2.58905e-18	37	2	9235600	2	9153051	F			NA	NA								TRUE	2:9152983-9153075			NA
cg23233742	-0.0223758	0.00738399	0.00267473	62	455	-0.0381398	0.00504232	6.13825e-14	1840	-0.0257406	0.00412262	5.37532e-10	68	0.00477228	6.89969e-08	-0.029934	0.00313758	-9.54046	1.42194e-21	0.107084	0.00477228	6.89969e-08	2.6322e-18	37	5	139077894	5	139058078	F	rs72000517		NA	NA				chr5:139076542-139077179	S_Shore		RDMR	TRUE		5:139076721-139077981	Unclassified	TRUE
cg00863378	-0.0151304	0.0065076	0.0207957	62	455	-0.0374113	0.00471575	3.67376e-15	1840	-0.0344049	0.00535834	1.75075e-10	68	0.00620272	2.91043e-08	-0.0310218	0.00325175	-9.54003	1.42792e-21	0.0174523	0.00620272	2.91043e-08	2.63235e-18	37	16	56549757	16	55107258	R			NA	NA	BBS2	NM_031885	Body	chr16:56553529-56554075	N_Shelf			NA				NA
cg15803221	-0.0138548	0.0115336	0.230683	62	455	-0.0440488	0.00511427	1.50449e-17	1840	-0.0312146	0.00574418	6.29806e-08	68	0.00664937	2.6744e-06	-0.036483	0.00382452	-9.53924	1.43888e-21	0.0356959	0.00664937	2.6744e-06	2.64165e-18	37	17	38473166	17	35726692	F	rs80014609		NA	NA	RARA;RARA;RARA	NM_001145302;NM_000964;NM_001145301	TSS1500;5'UTR;TSS1500	chr17:38472958-38473201	Island			TRUE	17:35726539-35726727	17:38472852-38476047	Promoter_Associated	NA
cg19908207	-0.0226632	0.00700879	0.0013712	62	455	-0.0312477	0.00506354	8.32028e-10	1840	-0.0319835	0.00418284	3.42393e-14	68	0.00484199	3.96311e-11	-0.0298423	0.00313093	-9.53145	1.55099e-21	0.516397	0.00484199	3.96311e-11	2.8358e-18	37	5	137610645	5	137638544	R			NA	NA	GFRA3	NM_001496	TSS1500	chr5:137610105-137610311	S_Shore			TRUE		5:137609701-137610855	Unclassified_Cell_type_specific	NA
cg02438545	-0.0259083	0.00727261	0.000432678	62	455	-0.0283086	0.00411728	8.42832e-12	1840	-0.0263547	0.00410121	1.69255e-10	68	0.0047475	2.83567e-08	-0.0272284	0.00285989	-9.52079	1.71866e-21	0.934427	0.0047475	2.83567e-08	3.12954e-18	37	9	99380444	9	98420265	R			NA	NA	CDC14B;CDC14B	NM_003671;NM_033331	Body;Body	chr9:99380814-99382236	N_Shore			NA				NA
cg23009067	-0.0105028	0.00507293	0.0393477	62	455	-0.0263084	0.00392411	2.68299e-11	1840	-0.035392	0.00414985	3.20727e-17	68	0.0048038	1.73861e-13	-0.0248095	0.00260702	-9.5164	1.79286e-21	0.00153967	0.0048038	1.73861e-13	3.25138e-18	37	7	2775923	7	2742449	F			NA	NA	GNA12	NM_007353	Body	chr7:2774444-2774655	S_Shore			TRUE	7:2742399-2742473			NA
cg01803759	-0.0130463	0.00481282	0.00713402	62	455	-0.0178536	0.00238297	1.04607e-13	1840	-0.0194154	0.00315832	9.77782e-10	68	0.00365602	1.09303e-07	-0.0175452	0.001844	-9.51474	1.82159e-21	0.562078	0.00365602	1.09303e-07	3.28188e-18	37	1	27831295	1	27703882	F			NA	NA								TRUE				TRUE
cg01368217	-0.0220222	0.00624082	0.000488976	62	455	-0.0352055	0.00472417	1.40478e-13	1840	-0.0283978	0.00486144	6.17993e-09	68	0.00562752	4.50597e-07	-0.0297827	0.00313021	-9.51459	1.82439e-21	0.231712	0.00562752	4.50597e-07	3.28188e-18	37	10	127836603	10	127826593	R			NA	NA	ADAM12;ADAM12	NM_003474;NM_021641	Body;Body					TRUE				NA
cg12363903	-0.0439127	0.0102757	2.65285e-05	62	455	-0.033325	0.00465893	1.22091e-12	1840	-0.0524184	0.00920087	1.4315e-08	68	0.0106508	8.58575e-07	-0.0374984	0.00394187	-9.51284	1.8553e-21	0.206549	0.0106508	8.58575e-07	3.32407e-18	37	5	134526269	5	134554168	F			NA	NA				chr5:134526927-134527419	N_Shore		CDMR	NA	5:134554072-134554208			NA
cg10198479	-0.0467992	0.0119827	0.000118272	62	455	-0.0508752	0.00762659	3.35561e-11	1840	-0.0524792	0.00816986	1.72075e-10	68	0.0094573	2.87196e-08	-0.0505794	0.00531963	-9.50806	1.94244e-21	0.931752	0.0094573	2.87196e-08	3.46628e-18	37	16	85268435	16	83825936	F			NA	NA				chr16:85269192-85269464	N_Shore			NA	16:83825859-83826016			NA
cg21545013	-0.0224453	0.00717446	0.0019451	62	455	-0.0269893	0.00439714	1.02149e-09	1840	-0.0268847	0.00353355	4.55135e-14	68	0.00409037	4.94231e-11	-0.0262672	0.00276377	-9.5041	2.0178e-21	0.8464	0.00409037	4.94231e-11	3.58643e-18	37	1	8407891	1	8330478	R			NA	NA				chr1:8403697-8404102	S_Shelf			NA				NA
cg27143204	-0.0164595	0.0068905	0.0175788	62	455	-0.0344237	0.00396837	8.95986e-18	1840	-0.0205476	0.00434248	2.40857e-06	68	0.00502679	4.35823e-05	-0.0269521	0.00283824	-9.49605	2.18007e-21	0.023672	0.00502679	4.35823e-05	3.85945e-18	37	5	54530375	5	54566132	F			NA	NA	CCNO	NM_021147	TSS1500	chr5:54528095-54528404	S_Shore			NA	5:54566036-54566194			NA
cg11316386	-0.0236904	0.00979724	0.0162508	62	455	-0.044654	0.006729	4.22516e-11	1840	-0.0488265	0.00631451	1.78715e-14	68	0.00730958	2.39272e-11	-0.0419146	0.00441858	-9.48599	2.40099e-21	0.104351	0.00730958	2.39272e-11	4.23376e-18	37	1	247275808	1	245342431	R			NA	NA	C1orf229	NM_207401	TSS200	chr1:247274585-247275757	S_Shore			TRUE		1:247273921-247275897	Unclassified_Cell_type_specific	NA
cg05517976	-0.00763152	0.00412849	0.0655995	62	455	-0.0209516	0.00243125	1.44628e-17	1840	-0.00955143	0.00155228	9.4355e-10	68	0.00179689	1.06349e-07	-0.0129297	0.00136392	-9.47982	2.54722e-21	0.000324206	0.00179689	1.06349e-07	4.47394e-18	37	7	27220049	7	27186574	F			NA	NA	HOXA10	NM_153715	TSS200	chr7:27219309-27219750	S_Shore			NA		7:27218624-27220804	Unclassified	NA
cg22515654	-0.040463	0.010638	0.000175602	62	455	-0.0485252	0.00666235	4.80091e-13	1840	-0.0369615	0.00655724	2.0227e-08	68	0.00759056	1.11935e-06	-0.0429437	0.00453042	-9.47895	2.56851e-21	0.502241	0.00759056	1.11935e-06	4.49364e-18	37	1	10590672	1	10513259	R			NA	NA	PEX14	NM_004565	Body					NA	1:10513054-10513262			NA
cg25491122	-0.0640354	0.007687	3.81486e-15	62	455	-0.0202925	0.00485646	3.07244e-05	1840	-0.0285976	0.00481523	3.46528e-09	68	0.00557403	2.88977e-07	-0.0313033	0.00330575	-9.46935	2.81584e-21	7.85966e-06	0.00557403	2.88977e-07	4.90664e-18	37	13	67801551	13	66699552	F			NA	NA	PCDH9;PCDH9	NM_203487;NM_020403	Body;Body	chr13:67804593-67805459	N_Shelf		CDMR	NA				NA
cg21715751	-0.0333684	0.00863881	0.00013984	62	455	-0.0394894	0.00626105	3.55032e-10	1840	-0.0383095	0.00556991	8.48243e-12	68	0.00644764	2.822e-09	-0.037736	0.00398524	-9.46895	2.82658e-21	0.84284	0.00644764	2.822e-09	4.90664e-18	37	19	33795390	19	38487230	R			NA	NA	LOC80054	NR_026887	Body	chr19:33792061-33794944	S_Shore			NA		19:33795345-33795497	Unclassified_Cell_type_specific	NA
cg04550950	-0.0476487	0.00721157	2.01041e-10	62	455	-0.033177	0.00629292	1.50744e-07	1840	-0.0323871	0.00609077	1.19091e-07	68	0.00705058	4.35792e-06	-0.0372387	0.00393455	-9.46455	2.94818e-21	0.22607	0.00705058	4.35792e-06	5.09789e-18	37	1	90299895	1	90072483	F			NA	NA	LRRC8D;LRRC8D	NM_018103;NM_001134479	5'UTR;5'UTR					TRUE				NA
cg09598552	-0.016825	0.00726821	0.0213535	62	455	-0.0300129	0.00444981	2.04589e-11	1840	-0.0405083	0.00521991	1.44533e-14	68	0.00604248	2.02912e-11	-0.0304034	0.00321377	-9.46036	3.06881e-21	0.0429715	0.00604248	2.02912e-11	5.286e-18	37	10	73417893	10	73087899	F			NA	NA	CDH23	NM_022124	Body					TRUE				NA
cg10045354	-0.0333085	0.00772524	2.25768e-05	62	455	-0.0375764	0.00476246	5.13669e-15	1840	-0.0213431	0.00506274	2.61968e-05	68	0.00586055	0.000270709	-0.0315276	0.00333405	-9.45626	3.19146e-21	0.0960264	0.00586055	0.000270709	5.45169e-18	37	11	111169427	11	110674637	R			NA	NA	C11orf93;C11orf92	NM_001136105;NM_207429	TSS1500;5'UTR	chr11:111169304-111170428	Island			NA	11:110674530-110675889			TRUE
cg02409364	-0.019079	0.00687869	0.00592124	62	455	-0.0284581	0.00566903	5.66855e-07	1840	-0.0387875	0.00424723	1.83369e-19	68	0.00491652	2.9976e-15	-0.0309052	0.00326825	-9.4562	3.1933e-21	0.0574848	0.00491652	2.9976e-15	5.45169e-18	37	20	35199934	20	34633348	R			NA	NA				chr20:35201323-35203490	N_Shore		RDMR	NA				NA
cg01344797	-0.011848	0.00510365	0.0209891	62	455	-0.0254267	0.00336477	6.47667e-14	1840	-0.0191625	0.00292204	7.20414e-11	68	0.00338251	1.46883e-08	-0.020435	0.00216108	-9.45593	3.20167e-21	0.0752748	0.00338251	1.46883e-08	5.45169e-18	37	10	104172924	10	104162914	F			NA	NA	PSD	NM_002779	Body	chr10:104168558-104169153	S_Shelf			NA		10:104172924-104173137	Unclassified_Cell_type_specific	TRUE
cg16248287	-0.0146211	0.00515633	0.00491288	62	455	-0.0226458	0.00327297	6.25473e-12	1840	-0.0168699	0.00243145	5.6109e-12	68	0.00281461	2.05114e-09	-0.0186375	0.00197184	-9.45183	3.3296e-21	0.286372	0.00281461	2.05114e-09	5.6196e-18	37	10	21804965	10	21844971	F			NA	NA	C10orf140	NM_207371	Body	chr10:21805197-21805459	N_Shore		CDMR	NA		10:21804943-21805025	Unclassified_Cell_type_specific	NA
cg04242898	-0.0194272	0.00472464	5.18181e-05	62	455	-0.0263667	0.00423239	5.77606e-10	1840	-0.0241891	0.00353982	1.14845e-11	68	0.00409764	3.56542e-09	-0.0236162	0.00249859	-9.45182	3.32983e-21	0.541178	0.00409764	3.56542e-09	5.6196e-18	37	22	43043131	22	41373075	F	rs5996204		NA	NA	CYB5R3;CYB5R3;CYB5R3	NM_007326;NM_000398;NM_001129819	TSS200;Body;TSS200	chr22:43045009-43045679	N_Shore			NA				NA
cg00108715	-0.0182304	0.00567321	0.00146723	62	455	-0.0308512	0.0043581	2.05658e-12	1840	-0.0241165	0.00367453	6.96134e-11	68	0.00425358	1.43054e-08	-0.0253519	0.00268229	-9.45156	3.33806e-21	0.196678	0.00425358	1.43054e-08	5.6196e-18	37	3	52565015	3	52540055	F			NA	NA	NT5DC2;NT5DC2	NM_001134231;NM_022908	Body;Body	chr3:52567009-52568807	N_Shore			NA		3:52564840-52565242	Unclassified_Cell_type_specific	NA
cg24361265	-0.0546536	0.0147509	0.000255247	62	455	-0.0652785	0.00896711	4.93138e-13	1840	-0.0516964	0.00919538	2.19975e-08	68	0.0106444	1.19376e-06	-0.0587543	0.00621873	-9.44796	3.45514e-21	0.592655	0.0106444	1.19376e-06	5.79483e-18	37	15	44068668	15	41855960	F			NA	NA	ELL3	NM_025165	Body	chr15:44068586-44069792	Island		RDMR	TRUE	15:41855895-41857084	15:44068213-44070508	Promoter_Associated	NA
cg02029665	-0.0130564	0.00370932	0.000504851	62	455	-0.0225259	0.00326215	6.87663e-12	1840	-0.0196828	0.00296706	4.37528e-11	68	0.00343462	1.00019e-08	-0.0188299	0.00199434	-9.44165	3.66949e-21	0.151977	0.00343462	1.00019e-08	6.13128e-18	37	22	46441799	22	44820463	F	rs12158719		NA	NA	LOC100271722	NR_027036	TSS1500	chr22:46440393-46441019	S_Shore			NA				NA
cg12252865	-0.0204365	0.00640605	0.00158586	62	455	-0.0203227	0.0033171	1.09494e-09	1840	-0.0260854	0.00345085	6.5742e-14	68	0.00399465	6.57325e-11	-0.0223681	0.00237077	-9.43494	3.91234e-21	0.51245	0.00399465	6.57325e-11	6.51266e-18	37	3	13520771	3	13495771	F			NA	NA	HDAC11;HDAC11	NM_001136041;NM_024827	TSS1500;TSS1500	chr3:13520912-13521319	N_Shore			NA				NA
cg12371924	-0.0251373	0.00820671	0.00240765	62	455	-0.0421126	0.00645534	8.84102e-11	1840	-0.0470718	0.00633515	1.70186e-13	68	0.00733347	1.37379e-10	-0.03933	0.00417249	-9.42603	4.25911e-21	0.117002	0.00733347	1.37379e-10	7.06354e-18	37	12	25102469	12	24993736	F			NA	NA	BCAT1	NM_005504	TSS200	chr12:25101607-25102073	S_Shore			NA		12:25101345-25102494	Promoter_Associated	NA
cg03654166	-0.0346546	0.00578379	6.46478e-09	62	455	-0.0257649	0.004354	3.8888e-09	1840	-0.0240813	0.00465187	2.52476e-07	68	0.00538493	7.75013e-06	-0.027538	0.00292191	-9.42465	4.31559e-21	0.351357	0.00538493	7.75013e-06	7.13072e-18	37	2	172944393	2	172652639	R			NA	NA	MAP1D	NM_199227	Body	chr2:172944988-172945384	N_Shore		RDMR	NA		2:172944226-172944461	Unclassified_Cell_type_specific	NA
cg18282388	-0.0312393	0.00720852	2.0561e-05	62	455	-0.0338337	0.00489428	6.52417e-12	1840	-0.0290618	0.00528684	4.445e-08	68	0.00611995	2.04741e-06	-0.0318114	0.00337694	-9.4202	4.50247e-21	0.827418	0.00611995	2.04741e-06	7.41205e-18	37	11	129716470	11	129221680	R			NA	NA	TMEM45B	NM_138788	5'UTR					TRUE				TRUE
cg20494738	-0.0239077	0.00463876	4.8681e-07	62	455	-0.0169709	0.00235391	8.15529e-13	1840	-0.0092468	0.00170129	6.26122e-08	68	0.00196938	2.6624e-06	-0.0135278	0.00143624	-9.41888	4.55905e-21	0.00264277	0.00196938	2.6624e-06	7.47759e-18	37	12	124985889	12	123551842	F	rs73423681		NA	NA	NCOR2;NCOR2	NM_006312;NM_001077261	5'UTR;5'UTR					TRUE	12:123551376-123551979			NA
cg02453726	-0.0183483	0.00524556	0.000546448	62	455	-0.0161651	0.00272561	3.59228e-09	1840	-0.0229383	0.00299928	3.38388e-14	68	0.00347191	3.92709e-11	-0.0186905	0.00198454	-9.41806	4.59512e-21	0.307338	0.00347191	3.92709e-11	7.50915e-18	37	5	141339766	5	141319950	F		rs75001959	NA	NA	PCDH12	NM_016580	TSS1500					TRUE		5:141339595-141339883	Unclassified	NA
cg06002638	-0.0229439	0.0069323	0.0010581	62	455	-0.0175033	0.00319285	4.78554e-08	1840	-0.0274972	0.00330308	1.70599e-16	68	0.00382359	6.41043e-13	-0.0217574	0.00231062	-9.41626	4.67426e-21	0.131466	0.00382359	6.41043e-13	7.61059e-18	37	12	109592017	12	108076400	R			NA	NA	ACACB	NM_001093	Body	chr12:109592315-109592633	N_Shore			NA		12:109591912-109593277	Promoter_Associated	NA
cg03849731	-0.0138292	0.00592836	0.0203821	62	455	-0.0327628	0.00404353	9.70591e-16	1840	-0.0229166	0.00397271	9.47102e-09	68	0.00459874	6.25334e-07	-0.0254267	0.00270271	-9.40789	5.06215e-21	0.0245194	0.00459874	6.25334e-07	8.21219e-18	37	3	129326718	3	130809408	R		rs9867668	NA	NA	PLXND1	NM_015103	TSS1500	chr3:129323915-129325332	S_Shore			NA		3:129326446-129326914	Unclassified_Cell_type_specific	NA
cg18064256	-0.0383413	0.00874202	1.64501e-05	62	455	-0.0368883	0.00573597	1.61111e-10	1840	-0.0335835	0.00547453	1.05865e-09	68	0.00633723	1.16188e-07	-0.0359629	0.00382418	-9.40407	5.24916e-21	0.886468	0.00633723	1.16188e-07	8.48472e-18	37	19	45905621	19	50597461	F			NA	NA	PPP1R13L;PPP1R13L	NM_001142502;NM_006663	5'UTR;5'UTR	chr19:45908140-45908466	N_Shelf			NA		19:45905615-45905920	Unclassified	TRUE
cg00395063	-0.029887	0.00548936	1.14842e-07	62	455	-0.0207399	0.00352357	4.68995e-09	1840	-0.019324	0.00322221	2.44451e-09	68	0.00372997	2.21032e-07	-0.021827	0.00232115	-9.40356	5.27493e-21	0.259056	0.00372997	2.21032e-07	8.49558e-18	37	11	120210293	11	119715503	F			NA	NA	ARHGEF12	NM_015313	Body	chr11:120206460-120207649	S_Shelf			NA				NA
cg21606956	-0.0117389	0.00392484	0.00303238	62	455	-0.0241476	0.00321268	8.74472e-14	1840	-0.0154746	0.00245182	3.51125e-10	68	0.00283819	4.97235e-08	-0.0175652	0.00187007	-9.39281	5.84223e-21	0.0310523	0.00283819	4.97235e-08	9.37542e-18	37	1	184211934	1	182478557	R			NA	NA								TRUE				NA
cg16027267	-0.0181753	0.00534679	0.000775313	62	455	-0.0294689	0.00432118	1.23374e-11	1840	-0.0241198	0.00364187	4.70016e-11	68	0.00421577	1.05696e-08	-0.0246621	0.00262794	-9.38458	6.31666e-21	0.255917	0.00421577	1.05696e-08	1.01004e-17	37	17	37820515	17	35074041	R		rs45591632	NA	NA	TCAP	NM_003673	TSS1500	chr17:37823693-37824989	N_Shelf			TRUE				NA
cg02379533	-0.00983145	0.00578436	0.0903215	62	455	-0.0255165	0.00359348	1.76508e-12	1840	-0.0183391	0.00249467	3.02612e-13	68	0.00288779	2.14538e-10	-0.0196661	0.00209776	-9.37481	6.93036e-21	0.0563459	0.00288779	2.14538e-10	1.10422e-17	37	5	154214618	5	154194811	R			NA	NA	C5orf4	NM_032385	Body			low-CpG:154194792-154194813		NA				NA
cg21160357	-0.0279112	0.00656314	2.89399e-05	62	455	-0.0348035	0.00484792	1.01416e-12	1840	-0.0245565	0.00473399	2.38732e-07	68	0.00547999	7.42483e-06	-0.0297439	0.00317718	-9.36172	7.8448e-21	0.356427	0.00547999	7.42483e-06	1.24547e-17	37	7	47522272	7	47488797	R			NA	NA	TNS3	NM_022748	5'UTR					TRUE				TRUE
cg26161024	-0.0186048	0.00432349	2.33984e-05	62	455	-0.0205784	0.00334895	9.79507e-10	1840	-0.0169892	0.00259506	7.74887e-11	68	0.00300399	1.55366e-08	-0.0185927	0.00198624	-9.36075	7.91733e-21	0.72742	0.00300399	1.55366e-08	1.25252e-17	37	1	27693840	1	27566427	F			NA	NA	MAP3K6	NM_004672	TSS1500	chr1:27692412-27693243	S_Shore			NA		1:27692972-27694160	Promoter_Associated	NA
cg05669853	-0.012274	0.00532298	0.0218602	62	455	-0.0329841	0.00421698	8.70908e-15	1840	-0.0249982	0.00392149	2.35177e-10	68	0.00453945	3.6527e-08	-0.0249982	0.00267209	-9.3553	8.33598e-21	0.00955963	0.00453945	3.6527e-08	1.3141e-17	37	6	107435226	6	107541919	R			NA	NA	BEND3;BEND3	NM_001080450;NM_001080450	1stExon;5'UTR	chr6:107435454-107437310	N_Shore			NA				NA
cg17164905	-0.00656523	0.00520519	0.208271	62	455	-0.0268763	0.00324802	2.44191e-16	1840	-0.0205489	0.0033399	9.47178e-10	68	0.00386622	1.06663e-07	-0.0209702	0.00224394	-9.34524	9.16853e-21	0.004134	0.00386622	1.06663e-07	1.44025e-17	37	1	27931310	1	27803897	R			NA	NA	AHDC1	NM_001029882	TSS1500	chr1:27929705-27930866	S_Shore			NA	1:27803737-27803945			NA
cg21422605	-0.0173951	0.00455531	0.000165747	62	455	-0.0278161	0.00422661	6.06764e-11	1840	-0.0241368	0.00366938	6.32018e-11	68	0.00424762	1.32791e-08	-0.0233916	0.00250318	-9.34477	9.20876e-21	0.239374	0.00424762	1.32791e-08	1.44149e-17	37	1	85313514	1	85086102	F			NA	NA	LPAR3	NM_012152	Body					TRUE				NA
cg15728320	-0.0163486	0.00579885	0.00516158	62	455	-0.030383	0.00452314	2.46051e-11	1840	-0.0278237	0.00391134	1.65485e-12	68	0.00452771	7.98595e-10	-0.026127	0.00280169	-9.32546	1.10508e-20	0.144476	0.00452771	7.98595e-10	1.72379e-17	37	1	47658945	1	47431532	R			NA	NA								TRUE		1:47658105-47659561	Unclassified	TRUE
cg09776772	-0.0207629	0.00546466	0.000178407	62	455	-0.0122593	0.00154713	3.95072e-15	1840	-0.0099746	0.00242953	4.22317e-05	68	0.00281239	0.00039014	-0.0122522	0.00131568	-9.31247	1.24893e-20	0.214233	0.00281239	0.00039014	1.94138e-17	37	7	2150534	7	2117060	F			NA	NA	MAD1L1;MAD1L1;MAD1L1	NM_003550;NM_001013837;NM_001013836	Body;Body;Body					NA	7:2116939-2117617			NA
cg09537533	-0.0207651	0.00560566	0.000256015	62	455	-0.0259503	0.0042351	1.08963e-09	1840	-0.0229895	0.00331075	5.39595e-12	68	0.00383247	1.9902e-09	-0.0235952	0.00253461	-9.30922	1.28775e-20	0.744864	0.00383247	1.9902e-09	1.99478e-17	37	20	592957	20	540957	F			NA	NA				chr20:590222-591222	S_Shore		RDMR	NA				NA
cg02933228	-0.0160736	0.00464693	0.000627935	62	455	-0.0204327	0.00298173	9.85716e-12	1840	-0.0155707	0.00248798	4.90466e-10	68	0.00288004	6.43015e-08	-0.0176117	0.00189203	-9.30835	1.29838e-20	0.47075	0.00288004	6.43015e-08	2.0043e-17	37	11	64611087	11	64367663	F			NA	NA	CDC42BPG	NM_017525	Body	chr11:64611714-64612634	N_Shore			TRUE		11:64610375-64613007	Promoter_Associated	NA
cg23371208	-0.020679	0.00527186	0.00011065	62	455	-0.0245974	0.00370626	4.20679e-11	1840	-0.0187402	0.0030379	8.56625e-10	68	0.00351663	9.87329e-08	-0.0213565	0.00229632	-9.30033	1.40005e-20	0.513084	0.00351663	9.87329e-08	2.15378e-17	37	11	57408514	11	57165090	F			NA	NA	MIR130A	NR_029673	TSS200					NA				TRUE
cg07810884	-0.0134992	0.00519759	0.00990256	62	455	-0.0251234	0.00335507	1.07749e-13	1840	-0.0192265	0.00317342	1.68451e-09	68	0.0036735	1.66035e-07	-0.0207861	0.00223631	-9.29485	1.47416e-20	0.148306	0.0036735	1.66035e-07	2.26e-17	37	19	16178099	19	16039099	F			NA	NA	TPM4	NM_001145160	TSS1500	chr19:16178396-16178609	N_Shore			NA		19:16177987-16178319	Unclassified_Cell_type_specific	TRUE
cg04177945	-0.0199249	0.00792701	0.0125223	62	455	-0.0418744	0.00511798	5.15749e-16	1840	-0.0275235	0.0054273	4.3792e-07	68	0.00628255	1.18167e-05	-0.0328989	0.00354828	-9.2718	1.83032e-20	0.0390402	0.00628255	1.18167e-05	2.79641e-17	37	14	35838240	14	34907991	R			NA	NA				chr14:35838239-35838628	Island			NA	14:34907991-34908992			NA
cg03661409	-0.0285771	0.0066122	2.16188e-05	62	455	-0.0293676	0.00485868	1.81172e-09	1840	-0.0356681	0.00548802	1.0554e-10	68	0.00635284	1.9711e-08	-0.0309011	0.00333313	-9.27088	1.84612e-20	0.674953	0.00635284	1.9711e-08	2.81092e-17	37	2	191812319	2	191520564	F	rs16833092		NA	NA	GLS	NM_014905	Body					TRUE				NA
cg21120249	-0.0208544	0.00684805	0.0025491	62	455	-0.0366018	0.00530803	7.34969e-12	1840	-0.0294036	0.00445892	5.67406e-11	68	0.00516158	1.22203e-08	-0.0301792	0.00325557	-9.27002	1.86116e-20	0.188173	0.00516158	1.22203e-08	2.81822e-17	37	9	139921971	9	139041792	R			NA	TRUE	C9orf139;C9orf139;ABCA2;ABCA2	NM_207511;NM_207511;NM_001606;NM_212533	5'UTR;1stExon;Body;Body	chr9:139922197-139923447	N_Shore			NA		9:139921780-139922052	Promoter_Associated_Cell_type_specific	NA
cg11419186	-0.0289375	0.00559456	4.44779e-07	62	455	-0.0194357	0.00347736	2.62245e-08	1840	-0.0176398	0.00273373	1.42671e-10	68	0.00316453	2.48613e-08	-0.0200149	0.00215913	-9.26988	1.86355e-20	0.208604	0.00316453	2.48613e-08	2.81822e-17	37	16	81477373	16	80034874	F	rs77588737		NA	NA	CMIP	NM_198390	TSS1500	chr16:81477777-81477999	N_Shore			NA				NA
cg07621224	-0.0244337	0.00600767	6.21653e-05	62	455	-0.0282006	0.00441619	2.15437e-10	1840	-0.0215175	0.00340658	3.40318e-10	68	0.00394341	4.85417e-08	-0.0244729	0.00264177	-9.26384	1.97211e-20	0.528813	0.00394341	4.85417e-08	2.97233e-17	37	7	50355506	7	50326052	F			NA	NA	IKZF1	NM_006060	5'UTR					TRUE		7:50355497-50355573	Unclassified_Cell_type_specific	NA
cg07891911	-0.0164898	0.00680955	0.0160981	62	455	-0.0297664	0.00390393	3.89408e-14	1840	-0.0239611	0.00415286	9.39974e-09	68	0.00480728	6.21719e-07	-0.0256459	0.0027687	-9.2628	1.99144e-20	0.21819	0.00480728	6.21719e-07	2.99135e-17	37	15	35598798	15	33386090	R			NA	NA								TRUE				NA
cg22496986	-0.0184217	0.00661326	0.00571358	62	455	-0.0333885	0.00478446	4.14715e-12	1840	-0.0251987	0.00379176	4.04427e-11	68	0.00438927	9.4135e-09	-0.0269109	0.00290551	-9.26203	2.00587e-20	0.162595	0.00438927	9.4135e-09	3.00292e-17	37	17	3794573	17	3741322	R		rs34228146	NA	NA	CAMKK1;CAMKK1;CAMKK1	NM_172206;NM_172207;NM_032294	TSS1500;5'UTR;5'UTR	chr17:3795519-3796868	N_Shore			TRUE				NA
cg02341556	-0.0316052	0.00812223	0.000125107	62	455	-0.0355813	0.00504566	2.48856e-12	1840	-0.0277041	0.00511125	6.79896e-08	68	0.0059167	2.83598e-06	-0.0321442	0.00347099	-9.26083	2.02854e-20	0.59703	0.0059167	2.83598e-06	3.02669e-17	37	11	118781978	11	118287188	F			NA	NA	BCL9L	NM_182557	TSS1500	chr11:118781060-118781732	S_Shore			NA				TRUE
cg03602233	-0.034513	0.00739503	4.7713e-06	62	455	-0.0274341	0.00485802	1.8857e-08	1840	-0.026808	0.0040411	4.37291e-11	68	0.00467791	9.99776e-09	-0.0283822	0.00306633	-9.25608	2.12066e-20	0.65749	0.00467791	9.99776e-09	3.15359e-17	37	16	75144040	16	73701541	F	rs62059205		NA	NA	ZNRF1	NM_032268	3'UTR					TRUE		16:75143961-75144171	Promoter_Associated	NA
cg10980495	-0.0495724	0.0105953	4.52662e-06	62	455	-0.0506718	0.00808575	4.57895e-10	1840	-0.0533854	0.00930867	1.15025e-08	68	0.0107756	7.25906e-07	-0.0510855	0.00552027	-9.25418	2.1589e-20	0.966297	0.0107756	7.25906e-07	3.19979e-17	37	11	1774722	11	1731298	R			NA	NA	HCCA2;CTSD	NM_053005;NM_001909	Body;3'UTR	chr11:1774588-1775040	Island			NA	11:1731290-1731616	11:1774301-1774762	Unclassified_Cell_type_specific	NA
cg00531137	-0.045699	0.0102665	1.24008e-05	62	455	-0.0449426	0.00740787	1.57938e-09	1840	-0.0442344	0.0071003	5.85936e-10	68	0.0082192	7.37275e-08	-0.0448648	0.00484997	-9.25054	2.23354e-20	0.993722	0.0082192	7.37275e-08	3.29947e-17	37	16	57643932	16	56201433	F	rs11865370		NA	NA								TRUE		16:57643436-57644235	Unclassified	NA
cg00288957	-0.0238534	0.0066978	0.000434361	62	455	-0.0332071	0.00572946	7.98069e-09	1840	-0.0380415	0.00508019	1.11156e-13	68	0.00588074	9.87617e-11	-0.0323657	0.0034992	-9.24947	2.25605e-20	0.276885	0.00588074	9.87617e-11	3.32171e-17	37	15	65203541	15	62990594	R			NA	NA	ANKDD1A	NM_182703	TSS1500	chr15:65203730-65204392	N_Shore			NA				TRUE
cg21548464	-0.00473653	0.00274758	0.0858474	62	455	-0.00407169	0.000489171	1.64156e-16	1840	-0.00250876	0.000517734	1.37594e-06	68	0.000599321	2.83913e-05	-0.00347086	0.00037541	-9.24551	2.34111e-20	0.116608	0.000599321	2.83913e-05	3.43562e-17	37	13	50707937	13	49605938	F			NA	NA				chr13:50707585-50708019	Island		RDMR	TRUE	13:49605210-49605982			NA
cg06241374	-0.0171595	0.00727801	0.0190854	62	455	-0.0368128	0.00451805	6.7622e-16	1840	-0.016132	0.00261383	8.40995e-10	68	0.00302572	9.73449e-08	-0.0219623	0.00237626	-9.24237	2.41105e-20	0.000566438	0.00302572	9.73449e-08	3.52666e-17	37	2	56410071	2	56263575	R			NA	NA	CCDC85A	NM_001080433	TSS1500	chr2:56410865-56412539	N_Shore			NA		2:56410030-56411079	Unclassified	NA
cg13393782	-0.0184762	0.00528275	0.000547244	62	455	-0.026593	0.00369262	8.63439e-13	1840	-0.0173039	0.00301121	1.07616e-08	68	0.00348573	6.89747e-07	-0.0210812	0.00228531	-9.22465	2.84494e-20	0.161588	0.00348573	6.89747e-07	4.14772e-17	37	1	3099804	1	3089664	R			NA	NA	PRDM16;PRDM16	NM_022114;NM_199454	Body;Body	chr1:3102540-3103352	N_Shelf			NA		1:3099636-3099891	Unclassified_Cell_type_specific	NA
cg00214171	-0.0150634	0.00559009	0.00747817	62	455	-0.0267867	0.00408119	6.81694e-11	1840	-0.0216516	0.00304779	1.77006e-12	68	0.00352807	8.41241e-10	-0.0222171	0.00240857	-9.22416	2.8579e-20	0.232582	0.00352807	8.41241e-10	4.15303e-17	37	17	73642991	17	71154586	R			NA	NA	RECQL5;LOC100130933	NM_004259;NM_001162997	Body;5'UTR					NA				NA
cg19689330	-0.0280942	0.00569852	1.42054e-06	62	455	-0.0288176	0.00515051	2.53643e-08	1840	-0.0347649	0.00547508	2.7574e-10	68	0.00633787	4.12855e-08	-0.0301645	0.00327234	-9.21801	3.02668e-20	0.695154	0.00633787	4.12855e-08	4.38271e-17	37	6	5512308	6	5457307	F			NA	NA	FARS2	NM_006567	Body					TRUE				NA
cg16014085	-0.0367874	0.00746112	1.4175e-06	62	455	-0.0287213	0.00504596	1.4588e-08	1840	-0.0279298	0.00445665	4.64616e-10	68	0.00515894	6.16784e-08	-0.0299359	0.00324765	-9.21769	3.0356e-20	0.59084	0.00515894	6.16784e-08	4.38271e-17	37	16	30406122	16	30313623	F	rs9924949		NA	TRUE	ZNF48	NM_152652	TSS1500	chr16:30406290-30407290	N_Shore			NA	16:30313504-30314848	16:30406118-30407614	Promoter_Associated	NA
cg07197059	-0.0423112	0.00699523	4.73852e-09	62	455	-0.03034	0.00469062	1.26743e-10	1840	-0.0193546	0.00456175	2.32546e-05	68	0.0052806	0.00024712	-0.0288725	0.00313499	-9.20976	3.26845e-20	0.029639	0.0052806	0.00024712	4.70367e-17	37	14	23836012	14	22905852	R			NA	TRUE	EFS;EFS	NM_032459;NM_005864	TSS1500;TSS1500	chr14:23834435-23835947	S_Shore			NA				NA
cg21680729	-0.0167096	0.00643913	0.00996459	62	455	-0.0326855	0.00464809	2.85862e-12	1840	-0.0245899	0.00370555	4.3122e-11	68	0.00428948	9.89061e-09	-0.02607	0.00283122	-9.20805	3.32115e-20	0.11896	0.00428948	9.89061e-09	4.76414e-17	37	17	17426422	17	17367147	R			NA	NA	PEMT;PEMT;PEMT	NM_148172;NM_148173;NM_007169	Body;Body;Body					TRUE				NA
cg14322224	-0.0108417	0.00631533	0.0871508	62	455	-0.0299508	0.00395024	5.36269e-14	1840	-0.0243152	0.00377854	1.59754e-10	68	0.00437397	2.7123e-08	-0.0244802	0.00265909	-9.20621	3.3783e-20	0.0371956	0.00437397	2.7123e-08	4.83059e-17	37	1	85931226	1	85703814	R			NA	TRUE	DDAH1;DDAH1	NM_012137;NM_001134445	TSS1500;5'UTR	chr1:85929940-85931168	S_Shore			NA				NA
cg19408882	-0.0147584	0.00703589	0.0368508	62	455	-0.0299566	0.00426052	2.8748e-12	1840	-0.0282377	0.00415566	1.48984e-11	68	0.00481052	4.35831e-09	-0.0267391	0.00290492	-9.20477	3.42417e-20	0.168059	0.00481052	4.35831e-09	4.88054e-17	37	17	34101272	17	31125385	F			NA	NA	MMP28	NM_024302	Body	chr17:34097100-34097399	S_Shelf			TRUE				TRUE
cg25481160	-0.0230057	0.0073415	0.00191249	62	455	-0.0402023	0.00568193	2.1089e-12	1840	-0.0359133	0.00583999	9.64838e-10	68	0.00676028	1.08189e-07	-0.0344201	0.00374215	-9.19793	3.64913e-20	0.173622	0.00676028	1.08189e-07	5.18461e-17	37	3	71111489	3	71194179	R			NA	NA	FOXP1	NM_032682	Body	chr3:71113896-71114102	N_Shelf			NA				NA
cg02194684	-0.0245765	0.00732127	0.000899097	62	455	-0.0365931	0.00529694	6.73181e-12	1840	-0.0337188	0.00558333	1.8953e-09	68	0.00646318	1.8178e-07	-0.0328481	0.00357516	-9.18787	4.00685e-20	0.407693	0.00646318	1.8178e-07	5.67479e-17	37	5	31853945	5	31889702	R			NA	NA	PDZD2	NM_178140	Body	chr5:31855003-31855426	N_Shore			NA				NA
cg01408363	-0.0108521	0.00323503	0.000906303	62	455	-0.00582901	0.000900613	1.23468e-10	1840	-0.010997	0.00151297	5.49981e-13	68	0.00175139	3.40666e-10	-0.00713749	0.000777451	-9.18064	4.28556e-20	0.0158779	0.00175139	3.40666e-10	6.03657e-17	37	12	125033903	12	123599856	F	rs12423712		NA	NA								TRUE	12:123599624-123600303			TRUE
cg01730666	-0.0129712	0.00696615	0.0636619	62	455	-0.0252565	0.00382492	5.25116e-11	1840	-0.0251212	0.00343668	4.08793e-13	68	0.00397824	2.7078e-10	-0.0235364	0.00256372	-9.18054	4.28936e-20	0.264322	0.00397824	2.7078e-10	6.03657e-17	37	17	41924302	17	39279828	F			NA	NA	CD300LG;CD300LG;CD300LG;CD300LG	NM_001168323;NM_001168322;NM_001168324;NM_145273	TSS1500;TSS1500;TSS1500;TSS1500					TRUE	17:39279824-39280028	17:41923523-41924572	Unclassified	NA
cg24217948	-0.0292001	0.00839378	0.000585118	62	455	-0.0464985	0.00633067	3.07758e-13	1840	-0.0361913	0.00681134	1.21707e-07	68	0.0078847	4.4311e-06	-0.0390512	0.00425511	-9.17747	4.41324e-20	0.235416	0.0078847	4.4311e-06	6.19137e-17	37	18	42261980	18	40515978	R			NA	NA	SETBP1;SETBP1	NM_001130110;NM_015559	5'UTR;5'UTR	chr18:42258983-42260795	S_Shore		RDMR	TRUE				NA
cg11367633	-0.0144342	0.00767378	0.0610268	62	455	-0.0402787	0.00485098	1.93802e-16	1840	-0.0233263	0.00429699	6.49518e-08	68	0.00497412	2.73834e-06	-0.0290263	0.00316395	-9.17406	4.55528e-20	0.00577139	0.00497412	2.73834e-06	6.37061e-17	37	20	40247916	20	39681330	R			NA	NA	CHD6	NM_032221	TSS1500	chr20:40246345-40247841	S_Shore		RDMR	NA		20:40246132-40248101	Promoter_Associated	NA
cg26002437	-0.0106217	0.00255267	4.2363e-05	62	455	-0.0110571	0.00168778	7.38476e-11	1840	-0.0104042	0.00183567	1.69404e-08	68	0.00212494	9.76982e-07	-0.0107659	0.00117365	-9.17299	4.60056e-20	0.969511	0.00212494	9.76982e-07	6.4033e-17	37	10	45473231	10	44793237	R			NA	NA	C10orf10;RASSF4	NM_007021;NM_032023	Body;Body	chr10:45470022-45470291	S_Shelf			NA				NA
cg25909064	-0.0222569	0.00638702	0.000572831	62	455	-0.0299438	0.00457732	7.85594e-11	1840	-0.0244569	0.00383144	2.22702e-10	68	0.00443521	3.50264e-08	-0.0261465	0.00285043	-9.17284	4.60736e-20	0.547658	0.00443521	3.50264e-08	6.4033e-17	37	11	120082805	11	119588015	F			NA	NA	OAF	NM_178507	Body	chr11:120081487-120082345	S_Shore			NA				NA
cg11405200	-0.00700008	0.00869929	0.421701	62	455	-0.0451686	0.00522946	1.22566e-17	1840	-0.0280342	0.00494881	1.72294e-08	68	0.00572867	9.89746e-07	-0.0323781	0.00352998	-9.17232	4.62968e-20	0.000534718	0.00572867	9.89746e-07	6.41433e-17	37	6	14212128	6	14320107	R			NA	NA				chr6:14211081-14211744	S_Shore			TRUE	6:14319834-14320108	6:14210614-14212383	Promoter_Associated	NA
cg21853707	-0.0241544	0.00597665	6.89357e-05	62	455	-0.0322336	0.00454151	1.80569e-12	1840	-0.0199512	0.00373773	1.0666e-07	68	0.00432674	4.00487e-06	-0.0254415	0.00277461	-9.1694	4.75658e-20	0.142754	0.00432674	4.00487e-06	6.56975e-17	37	1	164676874	1	162943498	F	rs1780366		NA	NA	PBX1	NM_002585	Body					TRUE				NA
cg25463688	-0.0218416	0.00605709	0.000368988	62	455	-0.0263732	0.00407877	1.28604e-10	1840	-0.0254029	0.00403267	3.79259e-10	68	0.00466816	5.27613e-08	-0.0251122	0.00273942	-9.16697	4.86514e-20	0.822416	0.00466816	5.27613e-08	6.69896e-17	37	1	235254025	1	233320648	F			NA	NA								TRUE				NA
cg09888330	-0.023272	0.00619229	0.000208829	62	455	-0.0242648	0.00377135	1.58071e-10	1840	-0.022285	0.00359942	7.45331e-10	68	0.00416662	8.87134e-08	-0.0233561	0.00254833	-9.16527	4.94244e-20	0.939727	0.00416662	8.87134e-08	6.78445e-17	37	1	156786010	1	155052634	F			NA	NA	SH2D2A;NTRK1;SH2D2A;SH2D2A;SH2D2A;SH2D2A	NM_001161442;NM_001007792;NM_001161443;NM_003975;NM_001161441;NM_001161444	Body;Body;TSS200;Body;Body;Body	chr1:156783523-156784037	S_Shore			NA		1:156785631-156787029	Promoter_Associated	NA
cg20951444	-0.0230152	0.00629032	0.000303452	62	455	-0.0307783	0.00469869	7.42559e-11	1840	-0.0246599	0.00395616	5.73814e-10	68	0.00457959	7.25516e-08	-0.026652	0.00290805	-9.1649	4.95919e-20	0.523437	0.00457959	7.25516e-08	6.78656e-17	37	1	33337112	1	33109699	R			NA	TRUE	FNDC5	NM_153756	TSS1500					TRUE				TRUE
cg02724490	-0.0188546	0.00547273	0.000659431	62	455	-0.0272895	0.0039371	5.74547e-12	1840	-0.0204701	0.00345489	3.76721e-09	68	0.00399932	3.08125e-07	-0.0228763	0.00249671	-9.16258	5.06708e-20	0.339853	0.00399932	3.08125e-07	6.913e-17	37	8	10488231	8	10525641	R			NA	NA	RP1L1	NM_178857	5'UTR					TRUE		8:10487569-10488477	Promoter_Associated	TRUE
cg20801110	-0.0271484	0.00846313	0.00149494	62	455	-0.0369935	0.00529036	3.76119e-12	1840	-0.0328687	0.00560151	5.28905e-09	68	0.00648422	3.99837e-07	-0.0337875	0.00368917	-9.15857	5.25907e-20	0.605709	0.00648422	3.99837e-07	7.15306e-17	37	15	75136007	15	72923060	R			NA	NA	ULK3	NM_001099436	TSS1500	chr15:75135186-75135905	S_Shore			NA	15:72922240-72923061	15:75134611-75136084	Promoter_Associated	NA
cg24310786	-0.0178119	0.00521881	0.000738817	62	455	-0.0243531	0.00385263	3.24948e-10	1840	-0.0200254	0.00299109	2.91374e-11	68	0.00346243	7.31112e-09	-0.021147	0.00230938	-9.15697	5.33772e-20	0.547205	0.00346243	7.31112e-09	7.23796e-17	37	6	33080054	6	33188032	R			NA	NA	HLA-DPB2	NR_001435	TSS1500					NA		6:33079977-33080306	Unclassified	TRUE
cg27526649	-0.0413186	0.00761679	1.26997e-07	62	455	-0.02934	0.005995	1.07386e-06	1840	-0.0371055	0.00567285	8.05041e-11	68	0.00656679	1.60003e-08	-0.0350037	0.00382778	-9.14465	5.98243e-20	0.431204	0.00656679	1.60003e-08	8.08761e-17	37	1	208132004	1	206198627	R			NA	NA				chr1:208132327-208133117	N_Shore			NA		1:208131746-208132074	Unclassified_Cell_type_specific	NA
cg00827893	-0.0163807	0.00570302	0.00439148	62	455	-0.0317195	0.00433647	3.83509e-13	1840	-0.0206013	0.0033925	1.54667e-09	68	0.0039271	1.55492e-07	-0.0237033	0.00259268	-9.14239	6.10846e-20	0.0581427	0.0039271	1.55492e-07	8.218e-17	37	13	33162946	13	32060946	F			NA	NA	PDS5B	NM_015032	5'UTR	chr13:33161192-33161835	S_Shore		RDMR	NA				NA
cg02960948	-0.0211088	0.00697236	0.00269896	62	455	-0.0310127	0.00463157	2.83746e-11	1840	-0.0282671	0.00438725	1.51811e-10	68	0.0050786	2.60788e-08	-0.0280853	0.00307208	-9.14214	6.12306e-20	0.496103	0.0050786	2.60788e-08	8.218e-17	37	17	62656813	17	60087275	R			NA	NA	SMURF2	NM_022739	Body	chr17:62657409-62658858	N_Shore			NA				NA
cg00718036	-0.00898079	0.00613188	0.144166	62	455	-0.0235656	0.00305053	1.82343e-14	1840	-0.0221759	0.00373024	3.34498e-09	68	0.00431807	2.8124e-07	-0.0211018	0.00230824	-9.14194	6.13414e-20	0.0991802	0.00431807	2.8124e-07	8.218e-17	37	4	108745325	4	108964774	R			NA	NA	SGMS2	NM_001136258	TSS1500	chr4:108745829-108746535	N_Shore		RDMR	NA				NA
cg17327331	-0.020796	0.00640208	0.0013045	62	455	-0.0401442	0.00504001	2.86541e-15	1840	-0.0229665	0.00478332	1.71291e-06	68	0.00553709	3.35745e-05	-0.0294333	0.00322108	-9.13771	6.37872e-20	0.0212736	0.00553709	3.35745e-05	8.52008e-17	37	14	67736448	14	66806201	F			NA	NA	MPP5	NM_022474	5'UTR					TRUE				NA
cg08190844	-0.031159	0.00782715	8.78484e-05	62	455	-0.032717	0.00525181	5.77889e-10	1840	-0.0290011	0.00464643	5.44745e-10	68	0.00537863	6.97079e-08	-0.0309513	0.00338748	-9.13695	6.42406e-20	0.884617	0.00537863	6.97079e-08	8.55502e-17	37	16	2526203	16	2466204	R			NA	NA	TBC1D24	NM_020705	5'UTR	chr16:2521086-2525929	S_Shore			NA	16:2463707-2466301			NA
cg23781467	-0.0347464	0.00668071	3.86776e-07	62	455	-0.0285083	0.00471509	1.79155e-09	1840	-0.0219965	0.00400812	4.67396e-08	68	0.00463974	2.12779e-06	-0.0270789	0.00296384	-9.1364	6.45651e-20	0.2713	0.00463974	2.12779e-06	8.57266e-17	37	6	31760233	6	31868212	R			NA	NA	VARS	NM_006295	Body	chr6:31763240-31763905	N_Shelf			NA		6:31758726-31760405	Gene_Associated	NA
cg13370427	-0.0162429	0.0065403	0.0136032	62	455	-0.024357	0.00386649	3.7263e-10	1840	-0.0231215	0.0032077	8.4711e-13	68	0.00371318	4.75835e-10	-0.0226414	0.00247843	-9.13537	6.51862e-20	0.556915	0.00371318	4.75835e-10	8.62943e-17	37	22	40743980	22	39073926	F		rs2735672	NA	NA	ADSL;ADSL	NM_001123378;NM_000026	Body;Body	chr22:40742403-40742944	S_Shore		RDMR	NA		22:40743583-40744441	Promoter_Associated	NA
cg12524640	-0.0260637	0.0057884	9.90666e-06	62	455	-0.0247303	0.00409883	1.93513e-09	1840	-0.0217237	0.00359711	1.89511e-09	68	0.00416396	1.81766e-07	-0.0238216	0.00260782	-9.1347	6.55905e-20	0.797312	0.00416396	1.81766e-07	8.65727e-17	37	1	2983056	1	2972916	R			NA	NA	FLJ42875;FLJ42875	NR_024371;NR_015440	Body;Body	chr1:2983925-2987962	N_Shore			NA		1:2983046-2983167	Unclassified_Cell_type_specific	TRUE
cg03693099	-0.0156606	0.00511851	0.00243438	62	455	-0.0284143	0.00402334	2.31211e-12	1840	-0.0204006	0.00330501	8.36541e-10	68	0.00382582	9.69483e-08	-0.0222675	0.00243782	-9.1342	6.58913e-20	0.120131	0.00382582	9.69483e-08	8.67131e-17	37	9	135936901	9	134926722	R			NA	TRUE	CEL	NM_001807	TSS1500					NA				NA
cg01332054	-0.0257312	0.00892317	0.00424072	62	455	-0.0366211	0.0050186	4.35272e-13	1840	-0.0280187	0.00498813	2.26226e-08	68	0.00577418	1.2197e-06	-0.0318217	0.00348671	-9.12657	7.07013e-20	0.40369	0.00577418	1.2197e-06	9.27694e-17	37	15	74494861	15	72281914	F	rs35794319		NA	NA	STRA6;STRA6;STRA6;STRA6;STRA6	NM_001142617;NM_001142618;NM_001142619;NM_022369;NM_001142620	5'UTR;5'UTR;5'UTR;5'UTR;5'UTR			low-CpG:72281833-72282584		TRUE				TRUE
cg13827287	-0.014833	0.00464584	0.00157239	62	455	-0.0208973	0.00342918	1.33835e-09	1840	-0.0216654	0.00305797	2.02449e-12	68	0.00353985	9.3326e-10	-0.0198571	0.0021761	-9.12508	7.1682e-20	0.467091	0.00353985	9.3326e-10	9.37804e-17	37	12	54730461	12	53016728	F			NA	NA	MIR148B;COPZ1	NR_029894;NM_016057	TSS1500;Body					NA		12:54730234-54730622	Unclassified	NA
cg26781524	-0.0239808	0.00577746	4.41913e-05	62	455	-0.0313914	0.00503176	5.4627e-10	1840	-0.0307777	0.00501365	1.031e-09	68	0.00580371	1.13848e-07	-0.0289684	0.0031759	-9.12131	7.42227e-20	0.584403	0.00580371	1.13848e-07	9.68204e-17	37	16	81272080	16	79829581	R			NA	NA	BCMO1	NM_017429	TSS1500					TRUE				NA
cg14387452	-0.019126	0.00530498	0.000369883	62	455	-0.0266213	0.00418871	2.61299e-10	1840	-0.0284002	0.00436946	1.05246e-10	68	0.00505802	1.96687e-08	-0.0251261	0.00275642	-9.11547	7.83328e-20	0.401391	0.00505802	1.96687e-08	1.01884e-16	37	9	20512334	9	20502334	R			NA	NA	MLLT3	NM_004529	Body					TRUE				NA
cg19184688	-0.0210184	0.00480703	1.74262e-05	62	455	-0.0157049	0.00329095	1.96634e-06	1840	-0.0211309	0.00279226	6.1683e-14	68	0.00323228	6.25633e-11	-0.0189441	0.00207916	-9.1114	8.1326e-20	0.446481	0.00323228	6.25633e-11	1.0547e-16	37	2	241935282	2	241583955	R			NA	NA				chr2:241937716-241938468	N_Shelf			NA				NA
cg03773647	-0.0283981	0.00973895	0.00383738	62	455	-0.0409816	0.00642118	2.20284e-10	1840	-0.0381403	0.00557367	1.07658e-11	68	0.00645199	3.39199e-09	-0.0375656	0.00412327	-9.11063	8.19068e-20	0.555151	0.00645199	3.39199e-09	1.05915e-16	37	11	57417949	11	57174525	R			NA	NA	YPEL4	NM_145008	TSS1500	chr11:57414400-57414664	S_Shelf			NA				NA
cg06171971	-0.0210789	0.00745884	0.00505714	62	455	-0.0319818	0.00465148	8.42431e-12	1840	-0.0271095	0.00432415	4.57904e-10	68	0.00500557	6.09919e-08	-0.0282314	0.00309931	-9.10892	8.32048e-20	0.44489	0.00500557	6.09919e-08	1.07282e-16	37	3	45948591	3	45923595	R			NA	NA								TRUE		3:45948011-45948960	Unclassified_Cell_type_specific	TRUE
cg02097604	-0.0130089	0.00500967	0.00991546	62	455	-0.0129387	0.00195898	5.19479e-11	1840	-0.0224962	0.00315199	1.40151e-12	68	0.00364869	7.02332e-10	-0.0148578	0.00163182	-9.10505	8.62296e-20	0.0646157	0.00364869	7.02332e-10	1.10862e-16	37	17	17750910	17	17691635	F			NA	NA	TOM1L2;TOM1L2	NM_001033551;NM_001082968	3'UTR;3'UTR					TRUE				NA
cg04359840	-0.0459313	0.00808943	3.45008e-08	62	455	-0.0324861	0.00587382	3.64735e-08	1840	-0.0312242	0.00570273	5.015e-08	68	0.00660138	2.24584e-06	-0.0351121	0.00385722	-9.10297	8.78975e-20	0.311063	0.00660138	2.24584e-06	1.12682e-16	37	16	17563300	16	17470801	F			NA	NA	XYLT1	NM_022166	Body				RDMR	TRUE				TRUE
cg00246969	-0.01332	0.00633105	0.0362908	62	455	-0.0236641	0.00436764	6.81813e-08	1840	-0.0238672	0.00287579	2.09557e-16	68	0.00332897	7.52509e-13	-0.0222337	0.00244262	-9.1024	8.8357e-20	0.311871	0.00332897	7.52509e-13	1.12946e-16	37	13	99159656	13	97957657	F			NA	NA	STK24;STK24	NM_003576;NM_001032296	Body;Body					TRUE				NA
cg08679180	-0.0144046	0.00514896	0.00551116	62	455	-0.0220434	0.00326776	2.03243e-11	1840	-0.0172758	0.00266046	1.09547e-10	68	0.0030797	2.02849e-08	-0.0187039	0.00205498	-9.10175	8.88869e-20	0.375938	0.0030797	2.02849e-08	1.13299e-16	37	11	73034459	11	72712107	F			NA	NA	ARHGEF17	NM_014786	Body					TRUE				TRUE
cg01807748	-0.0167266	0.00419372	8.52276e-05	62	455	-0.0208729	0.00275616	5.73007e-14	1840	-0.0133871	0.00331565	5.63958e-05	68	0.00383815	0.00048681	-0.0179713	0.00197495	-9.09964	9.06298e-20	0.269428	0.00383815	0.00048681	1.15191e-16	37	1	94534645	1	94307233	R			NA	NA	ABCA4	NM_000350	Body					TRUE				NA
cg08234504	-0.0186191	0.00424677	1.65615e-05	62	455	-0.0163702	0.00289467	1.80021e-08	1840	-0.0163332	0.00250269	8.85694e-11	68	0.00289708	1.72215e-08	-0.0167794	0.00184447	-9.09714	9.27406e-20	0.890759	0.00289708	1.72215e-08	1.17539e-16	37	5	139013317	5	138993501	F			NA	NA				chr5:139017133-139017668	N_Shelf			TRUE		5:139013288-139013559	Unclassified	NA
cg16509978	-0.0159347	0.0057483	0.00594898	62	455	-0.0197075	0.00343767	1.15201e-08	1840	-0.0239999	0.00313301	3.0829e-14	68	0.00362673	3.65327e-11	-0.0208188	0.00228868	-9.09643	9.33493e-20	0.450285	0.00362673	3.65327e-11	1.17976e-16	37	11	67121607	11	66878183	R			NA	NA	LOC100130987;POLD4	NR_024469;NM_021173	Body;TSS1500	chr11:67120856-67121228	S_Shore			NA		11:67120301-67122651	Promoter_Associated	NA
cg07298299	-0.0123837	0.00581609	0.0341217	62	455	-0.0276748	0.00392748	2.58459e-12	1840	-0.0254936	0.00380642	2.86562e-11	68	0.00440625	7.21785e-09	-0.0238064	0.00261803	-9.09325	9.61236e-20	0.0831609	0.00440625	7.21785e-09	1.21139e-16	37	11	45943237	11	45899813	R			NA	NA	GYLTL1B;GYLTL1B	NM_152312;NM_152312	1stExon;5'UTR	chr11:45943513-45944852	N_Shore			NA				TRUE
cg03259212	-0.0101213	0.00306859	0.00110012	62	455	-0.0132408	0.00197443	2.65099e-11	1840	-0.0140099	0.00229691	1.31281e-09	68	0.00265887	1.37086e-07	-0.0127995	0.00140836	-9.08822	1.00677e-19	0.600826	0.00265887	1.37086e-07	1.2652e-16	37	11	94609627	11	94249275	F			NA	NA	AMOTL1	NM_130847	3'UTR					TRUE		11:94609489-94610238	Unclassified_Cell_type_specific	NA
cg19699090	-0.0141877	0.00648074	0.0294193	62	455	-0.0270389	0.0041401	8.43067e-11	1840	-0.0283382	0.00394221	9.74723e-13	68	0.00456344	5.30383e-10	-0.0251676	0.00277169	-9.08025	1.08331e-19	0.168851	0.00456344	5.30383e-10	1.35756e-16	37	6	36808894	6	36916872	R		rs55729134	NA	NA				chr6:36806881-36807217	S_Shore			NA				TRUE
cg03729092	-0.0148025	0.00505469	0.00369044	62	455	-0.0321738	0.00449607	1.1948e-12	1840	-0.0282634	0.00448624	3.77501e-10	68	0.0051932	5.2573e-08	-0.0256108	0.00282068	-9.07963	1.0894e-19	0.0307484	0.0051932	5.2573e-08	1.36136e-16	37	12	117029821	12	115514204	F	rs76062147		NA	NA								TRUE				NA
cg07218081	-0.0128078	0.00524628	0.0152624	62	455	-0.0250393	0.00391441	2.00847e-10	1840	-0.0279077	0.00377325	2.183e-13	68	0.00436786	1.666e-10	-0.02313	0.00254814	-9.07722	1.11386e-19	0.0704552	0.00436786	1.666e-10	1.38805e-16	37	3	45066714	3	45041718	R			NA	NA	CLEC3B	NM_003278	TSS1500					NA		3:45066678-45066735	Unclassified_Cell_type_specific	NA
cg00426822	-0.0340193	0.0116827	0.00388534	62	455	-0.0547462	0.00695898	6.14387e-15	1840	-0.0346818	0.00742107	3.19375e-06	68	0.00859051	5.40878e-05	-0.044542	0.00490721	-9.07685	1.11763e-19	0.117722	0.00859051	5.40878e-05	1.38887e-16	37	1	39546536	1	39319123	R			NA	NA	MACF1	NM_012090	TSS1500	chr1:39547013-39547959	N_Shore			NA	1:39319098-39320506			TRUE
cg18725681	-0.0162591	0.00457996	0.000452599	62	455	-0.0218592	0.00329171	4.09775e-11	1840	-0.0192463	0.00322576	2.93997e-09	68	0.00373409	2.54698e-07	-0.0197127	0.00217349	-9.06962	1.19431e-19	0.60368	0.00373409	2.54698e-07	1.48003e-16	37	20	42940213	20	42373627	R			NA	NA	FITM2	NM_001080472	TSS1500	chr20:42939450-42940043	S_Shore			NA		20:42938581-42940393	Promoter_Associated	NA
cg06170683	-0.0300107	0.00785318	0.000163957	62	455	-0.0320901	0.00548237	5.69227e-09	1840	-0.0344448	0.00513398	2.65102e-11	68	0.00594301	6.7974e-09	-0.0325137	0.00358521	-9.06884	1.20294e-19	0.898909	0.00594301	6.7974e-09	1.4866e-16	37	16	3740774	16	3680775	F			NA	NA	TRAP1	NM_016292	Body					TRUE	16:3680612-3680937	16:3740303-3741769	Gene_Associated	NA
cg14526039	-0.0117644	0.00444547	0.0086028	62	455	-0.020818	0.0029379	1.95829e-12	1840	-0.0175858	0.00287714	1.21356e-09	68	0.00333053	1.29048e-07	-0.0178972	0.00197407	-9.06615	1.23295e-19	0.234532	0.00333053	1.29048e-07	1.51947e-16	37	3	49210221	3	49185225	R			NA	NA	KLHDC8B	NM_173546	Body	chr3:49208629-49209196	S_Shore			TRUE		3:49210221-49210424	Unclassified_Cell_type_specific	NA
cg25994988	-0.0191992	0.00634137	0.00269797	62	455	-0.0260532	0.00431086	1.81976e-09	1840	-0.0299627	0.00418355	1.17545e-12	68	0.00484281	6.13026e-10	-0.0260223	0.00287103	-9.06375	1.26044e-19	0.402568	0.00484281	6.13026e-10	1.54908e-16	37	11	122652382	11	122157592	F			NA	NA	UBASH3B	NM_032873	Body					TRUE		11:122651405-122652781	Unclassified	TRUE
cg13551754	-0.0350168	0.00885597	9.77227e-05	62	455	-0.0378079	0.00525765	9.31311e-13	1840	-0.0320863	0.00712294	7.09779e-06	68	0.0082454	9.9659e-05	-0.0359262	0.00396417	-9.06272	1.27234e-19	0.837144	0.0082454	9.9659e-05	1.55799e-16	37	1	21619913	1	21492500	F			NA	NA	ECE1	NM_001113348	Body	chr1:21616380-21617101	S_Shelf			TRUE		1:21619659-21619996	Promoter_Associated	NA
cg09612099	-0.0142926	0.00588776	0.0158425	62	455	-0.026055	0.00420597	7.18404e-10	1840	-0.0285707	0.00381508	1.10606e-13	68	0.00441627	9.8383e-11	-0.0245158	0.00270519	-9.06252	1.27468e-19	0.135887	0.00441627	9.8383e-11	1.55799e-16	37	11	102096840	11	101602050	F			NA	NA	YAP1;YAP1	NM_001130145;NM_006106	Body;Body					TRUE				TRUE
cg18828619	-0.0132278	0.0055296	0.0174179	62	455	-0.0281376	0.0036123	1.11629e-14	1840	-0.0200792	0.00376125	1.06282e-07	68	0.00435396	3.99399e-06	-0.0225068	0.00248382	-9.06136	1.28829e-19	0.062144	0.00435396	3.99399e-06	1.57032e-16	37	14	56615077	14	55684830	F			NA	NA	PELI2	NM_021255	Body					TRUE				NA
cg19873536	-0.0325909	0.0107073	0.00256148	62	455	-0.0485926	0.00725805	2.85523e-11	1840	-0.0368284	0.00583317	3.46452e-10	68	0.00675238	4.92135e-08	-0.0405827	0.00448843	-9.04163	1.54354e-19	0.352723	0.00675238	4.92135e-08	1.87587e-16	37	10	116475283	10	116465273	R			NA	NA								TRUE				NA
cg20495365	-0.0144725	0.00893357	0.106372	62	455	-0.0328578	0.00513606	1.99834e-10	1840	-0.0329886	0.00440471	1.10205e-13	68	0.00509883	9.81063e-11	-0.0303232	0.00335383	-9.04136	1.54737e-19	0.16002	0.00509883	9.81063e-11	1.87587e-16	37	4	3371291	4	3341089	F			NA	NA	RGS12;RGS12;RGS12	NM_198227;NM_198229;NM_002926	TSS1500;Body;Body	chr4:3374733-3374998	N_Shelf			TRUE		4:3371177-3372283	Promoter_Associated	TRUE
cg24935556	-0.0235239	0.00589885	8.54368e-05	62	455	-0.0338453	0.00510739	4.49424e-11	1840	-0.0246417	0.00432355	1.4126e-08	68	0.00500487	8.4986e-07	-0.027639	0.00305714	-9.0408	1.55526e-19	0.313187	0.00500487	8.4986e-07	1.88033e-16	37	2	21291088	2	21144593	R			NA	NA								TRUE		2:21290965-21291101	Unclassified_Cell_type_specific	NA
cg16778405	-0.00569824	0.00318269	0.0744884	62	455	-0.00915	0.00113519	1.35584e-15	1840	-0.00696921	0.00154145	6.57095e-06	68	0.00178436	9.39474e-05	-0.0082872	0.000917162	-9.0357	1.62961e-19	0.409642	0.00178436	9.39474e-05	1.96489e-16	37	16	653443	16	593444	F			NA	NA	RAB40C	NM_021168	Body	chr16:649465-650057	S_Shelf			NA				NA
cg06627334	-0.0249387	0.00692039	0.000372124	62	455	-0.0212351	0.00420482	4.85083e-07	1840	-0.0364136	0.00452658	1.60259e-15	68	0.0052399	3.67117e-12	-0.0267695	0.00296355	-9.03291	1.67169e-19	0.0746513	0.0052399	3.67117e-12	2.01019e-16	37	5	141339748	5	141319932	F	rs164079		NA	NA	PCDH12	NM_016580	TSS1500					TRUE		5:141339595-141339883	Unclassified	NA
cg22428027	-0.0116281	0.00760986	0.12765	62	455	-0.0347437	0.00399582	7.53519e-18	1840	-0.0176449	0.0038979	6.4023e-06	68	0.00451215	9.20965e-05	-0.0251402	0.00278406	-9.03005	1.71594e-19	0.00289662	0.00451215	9.20965e-05	2.05786e-16	37	1	12128827	1	12051414	F			NA	NA	TNFRSF8	NM_001243	Body					TRUE		1:12128451-12128922	Unclassified	NA
cg17516330	-0.0239857	0.00746835	0.001476	62	455	-0.0333658	0.00516706	1.35927e-10	1840	-0.0251826	0.00389022	1.24868e-10	68	0.00450326	2.24364e-08	-0.0279052	0.00309055	-9.02919	1.72945e-19	0.415241	0.00450326	2.24364e-08	2.0685e-16	37	15	74494781	15	72281834	R			NA	NA	STRA6;STRA6;STRA6;STRA6;STRA6	NM_001142617;NM_001142618;NM_001142619;NM_022369;NM_001142620	5'UTR;5'UTR;5'UTR;5'UTR;5'UTR			low-CpG:72281833-72282584		TRUE				TRUE
cg10582860	-0.0185501	0.0064684	0.00445234	62	455	-0.0334151	0.00555088	2.10306e-09	1840	-0.0392971	0.00518794	5.85395e-14	68	0.00600547	6.00765e-11	-0.0311294	0.00344864	-9.02656	1.77158e-19	0.0549883	0.00600547	6.00765e-11	2.11322e-16	37	2	55347991	2	55201495	F			NA	NA								TRUE				NA
cg08161931	-0.0270315	0.00796257	0.000787571	62	455	-0.034078	0.005417	3.93336e-10	1840	-0.028556	0.00444553	1.7204e-10	68	0.00514607	2.87151e-08	-0.0304295	0.00337845	-9.00693	2.11899e-19	0.681032	0.00514607	2.87151e-08	2.5209e-16	37	8	145028402	8	145100390	F			NA	NA	PLEC1;PLEC1;PLEC1	NM_201379;NM_000445;NM_201378	TSS1500;Body;Body	chr8:145027911-145028352	S_Shore			NA				NA
cg24195878	-0.0318963	0.00642142	1.19258e-06	62	455	-0.0263664	0.00476784	3.6599e-08	1840	-0.0259738	0.0043632	3.18796e-09	68	0.00505077	2.71044e-07	-0.0274714	0.0030508	-9.00464	2.16383e-19	0.734741	0.00505077	2.71044e-07	2.56739e-16	37	19	18221573	19	18082573	F			NA	NA	MAST3	NM_015016	Body	chr19:18220764-18221445	S_Shore			NA				TRUE
cg14541011	-0.0267843	0.00584044	6.8586e-06	62	455	-0.0240374	0.00459801	1.91078e-07	1840	-0.019726	0.00292251	2.02165e-11	68	0.00338305	5.51534e-09	-0.0222313	0.0024694	-9.00274	2.20155e-19	0.51933	0.00338305	5.51534e-09	2.60522e-16	37	9	135989682	9	134979503	F			NA	NA	RALGDS;RALGDS	NM_001042368;NM_006266	Body;Body					TRUE		9:135989452-135989763	Unclassified_Cell_type_specific	NA
cg06321596	-0.0497047	0.00867316	2.61309e-08	62	455	-0.0387846	0.00623454	6.1031e-10	1840	-0.0286451	0.00700874	4.57099e-05	68	0.00811321	0.000414503	-0.038621	0.00429486	-8.99237	2.41956e-19	0.207454	0.00811321	0.000414503	2.85562e-16	37	16	17562960	16	17470461	F			NA	NA	XYLT1	NM_022166	Body				CDMR	TRUE				TRUE
cg12622182	-0.0182766	0.00863694	0.0352324	62	455	-0.037141	0.00502679	2.23917e-13	1840	-0.0251431	0.00421435	2.9462e-09	68	0.00487846	2.55112e-07	-0.0291723	0.00324446	-8.99142	2.44056e-19	0.0913276	0.00487846	2.55112e-07	2.87281e-16	37	1	38513641	1	38286228	F			NA	NA	POU3F1	NM_002699	TSS1500	chr1:38510102-38513642	Island			NA				NA
cg18645642	-0.0101908	0.00515651	0.049116	62	455	-0.0302924	0.00421844	1.00054e-12	1840	-0.0230886	0.00339634	1.45911e-11	68	0.00393154	4.28879e-09	-0.0225823	0.00251181	-8.99044	2.46232e-19	0.0103998	0.00393154	4.28879e-09	2.8908e-16	37	1	8631756	1	8554343	R			NA	NA	RERE;RERE	NM_012102;NM_001042681	Body;Body					TRUE				NA
cg12408494	-0.0233551	0.00728241	0.00149891	62	455	-0.0370999	0.00534501	5.37525e-12	1840	-0.030149	0.00523735	1.01533e-08	68	0.00606267	6.59625e-07	-0.03157	0.00351223	-8.9886	2.50397e-19	0.301523	0.00606267	6.59625e-07	2.93198e-16	37	3	171757077	3	173239771	F			NA	NA	FNDC3B;FNDC3B	NM_022763;NM_001135095	TSS1500;TSS1500	chr3:171757493-171758724	N_Shore			NA		3:171756881-171758808	Promoter_Associated	NA
cg04982488	-0.0223983	0.0062518	0.000401857	62	455	-0.0318773	0.00450435	2.0861e-12	1840	-0.0213623	0.00404463	1.44393e-07	68	0.004682	5.05115e-06	-0.0258835	0.00288087	-8.98464	2.59591e-19	0.221577	0.004682	5.05115e-06	3.03167e-16	37	10	116103698	10	116093688	F			NA	NA	AFAP1L2;AFAP1L2	NM_032550;NM_001001936	Body;Body					TRUE				NA
cg00411072	-0.00480136	0.00401595	0.23289	62	455	-0.0194843	0.00211314	7.83923e-20	1840	-0.00813401	0.002012	5.5169e-05	68	0.00232905	0.000478683	-0.0130994	0.00145819	-8.98334	2.62662e-19	0.000126896	0.00232905	0.000478683	3.05954e-16	37	17	46660940	17	44015939	F			NA	NA				chr17:46658948-46660003	S_Shore		RDMR	NA		17:46660729-46660947	Unclassified_Cell_type_specific	NA
cg13654836	-0.0223519	0.0062417	0.00040425	62	455	-0.0327358	0.00487192	2.42727e-11	1840	-0.0245993	0.00425949	9.11023e-09	68	0.00493072	6.06969e-07	-0.0272167	0.00302987	-8.98277	2.64026e-19	0.337469	0.00493072	6.06969e-07	3.06741e-16	37	17	55365912	17	52720911	R			NA	NA	MSI2;MSI2	NM_138962;NM_170721	Body;Body					TRUE				NA
cg18346576	-0.0204517	0.00650591	0.00185113	62	455	-0.0358623	0.00491731	4.48047e-13	1840	-0.0249783	0.00462434	7.53554e-08	68	0.00535306	3.06864e-06	-0.0284142	0.00316418	-8.97997	2.70843e-19	0.122206	0.00535306	3.06864e-06	3.13844e-16	37	2	27938071	2	27791575	R			NA	NA								NA	2:27791575-27791948			NA
cg21185271	-0.0132109	0.0042968	0.00231909	62	455	-0.0218738	0.00287786	4.66366e-14	1840	-0.0135046	0.00273294	8.5132e-07	68	0.00316361	1.9659e-05	-0.0171237	0.00190754	-8.97683	2.78676e-19	0.0879386	0.00316361	1.9659e-05	3.22084e-16	37	12	52569410	12	50855677	R			NA	NA	KRT80;KRT80	NM_001081492;NM_182507	Body;Body					TRUE		12:52568641-52570229	Unclassified_Cell_type_specific	NA
cg06708720	-0.0263028	0.00547952	2.60065e-06	62	455	-0.017259	0.00348	7.71827e-07	1840	-0.0215423	0.00314648	1.05109e-11	68	0.00364232	3.32986e-09	-0.020522	0.0022866	-8.97488	2.83653e-19	0.355114	0.00364232	3.32986e-09	3.26989e-16	37	12	1099075	12	969336	F			NA	NA	ERC1;ERC1;ERC1;ERC1;ERC1	NM_178040;NR_027949;NR_027946;NR_027948;NM_178039	TSS1500;TSS1500;TSS1500;TSS1500;TSS1500	chr12:1099557-1100785	N_Shore		RDMR	NA				TRUE
cg10053779	-0.0245869	0.00555867	1.40084e-05	62	455	-0.0331894	0.00524125	3.0269e-10	1840	-0.0277217	0.00509309	5.99669e-08	68	0.00589568	2.57574e-06	-0.0287222	0.00320198	-8.97014	2.96141e-19	0.519778	0.00589568	2.57574e-06	3.39899e-16	37	10	121497344	10	121487334	F			NA	NA	INPP5F;INPP5F	NM_014937;NR_003251	Body;Body					TRUE		10:121497304-121497650	Unclassified_Cell_type_specific	TRUE
cg12403162	-0.0198744	0.00592364	0.000904611	62	455	-0.039176	0.00538236	4.97294e-13	1840	-0.025974	0.00473259	4.66492e-08	68	0.00547837	2.12464e-06	-0.0289001	0.00322184	-8.97005	2.96376e-19	0.0438956	0.00547837	2.12464e-06	3.39899e-16	37	10	116394557	10	116384547	R			NA	NA	ABLIM1;ABLIM1;ABLIM1	NM_001003408;NM_001003407;NM_002313	Body;Body;Body	chr10:116391466-116391827	S_Shelf			NA				TRUE
cg02903680	-0.0407902	0.00891038	7.11266e-06	62	455	-0.0409257	0.00620844	5.65343e-11	1840	-0.0275923	0.0055234	6.46577e-07	68	0.0063938	1.59252e-05	-0.0357216	0.00398408	-8.9661	3.07204e-19	0.26677	0.0063938	1.59252e-05	3.51413e-16	37	15	85526198	15	83327202	F	rs74024775		NA	NA	PDE8A;PDE8A	NM_173454;NM_002605	Body;Body	chr15:85523512-85525865	S_Shore			NA				NA
cg22740603	-0.00934342	0.00539559	0.0844482	62	455	-0.0285898	0.00358515	2.66252e-15	1840	-0.0182118	0.00324694	2.36959e-08	68	0.0037586	1.26385e-06	-0.0209602	0.00233803	-8.96492	3.10512e-19	0.00783216	0.0037586	1.26385e-06	3.5429e-16	37	6	33397959	6	33505937	F		rs75233757	NA	NA	SYNGAP1	NM_006772	Body	chr6:33396050-33396296	S_Shore			TRUE				NA
cg27615095	-0.012865	0.00316742	6.35409e-05	62	455	-0.0158799	0.0025605	6.87309e-10	1840	-0.0132345	0.00223667	3.94972e-09	68	0.00258914	3.19526e-07	-0.014148	0.00157842	-8.96338	3.14864e-19	0.688655	0.00258914	3.19526e-07	3.58338e-16	37	12	63049980	12	61336247	F			NA	NA	PPM1H	NM_020700	Body					TRUE				NA
cg01894846	-0.0225871	0.00554982	6.1464e-05	62	455	-0.0256544	0.00484223	1.31107e-07	1840	-0.0326073	0.00460298	2.03809e-12	68	0.00532833	9.38101e-10	-0.0269713	0.00301049	-8.95913	3.27253e-19	0.403166	0.00532833	9.38101e-10	3.71491e-16	37	14	100752463	14	99822216	F			NA	NA				chr14:100751672-100752339	S_Shore			NA		14:100751296-100752955	Promoter_Associated	NA
cg17254383	-0.022385	0.00742034	0.00279367	62	455	-0.0389523	0.00531348	3.40927e-13	1840	-0.0260825	0.00483484	7.82095e-08	68	0.00559673	3.15734e-06	-0.0306283	0.00341981	-8.95613	3.36274e-19	0.113722	0.00559673	3.15734e-06	3.80762e-16	37	17	53363128	17	50718127	R			NA	NA	HLF	NM_002126	Body					TRUE				NA
cg01552919	-0.0118468	0.00759922	0.120154	62	455	-0.0237949	0.00333588	1.40585e-12	1840	-0.0257157	0.0040977	4.40061e-10	68	0.00474343	5.91553e-08	-0.0229934	0.00256813	-8.95335	3.44843e-19	0.281023	0.00474343	5.91553e-08	3.89476e-16	37	4	901847	4	891847	R			NA	NA	GAK	NM_005255	Body	chr4:899774-899985	S_Shore			TRUE	4:891685-892029			NA
cg04486382	-0.00814847	0.00247745	0.00113571	62	455	-0.00943234	0.0013313	1.97144e-12	1840	-0.010561	0.00206738	3.6113e-07	68	0.00239316	1.01946e-05	-0.00941892	0.00105307	-8.94426	3.74449e-19	0.782381	0.00239316	1.01946e-05	4.21846e-16	37	17	55483894	17	52838893	R			NA	NA	MSI2;MSI2	NM_138962;NM_170721	Body;Body					TRUE	17:52838838-52838908			NA
cg25057584	-0.0232143	0.00850744	0.00676671	62	455	-0.0340975	0.00521126	7.79117e-11	1840	-0.0292651	0.00454554	1.56575e-10	68	0.00526184	2.67065e-08	-0.0303525	0.00339506	-8.94021	3.88442e-19	0.53175	0.00526184	2.67065e-08	4.36508e-16	37	12	51745952	12	50032219	R			NA	NA	GALNT6	NM_007210	3'UTR					TRUE		12:51745550-51746390	Unclassified	TRUE
cg23133355	-0.0165378	0.00618892	0.00798466	62	455	-0.0211645	0.00272121	1.22161e-14	1840	-0.0190088	0.00459613	3.7081e-05	68	0.00532041	0.000353174	-0.0201621	0.00225601	-8.93706	3.99644e-19	0.768884	0.00532041	0.000353174	4.47967e-16	37	7	2519789	7	2486315	R			NA	NA								NA	7:2486301-2486401	7:2519759-2519965	Unclassified_Cell_type_specific	NA
cg14818621	-0.0120924	0.00555067	0.030212	62	455	-0.0284169	0.00407865	4.48534e-12	1840	-0.0236835	0.00360842	6.94997e-11	68	0.00417705	1.42874e-08	-0.0230718	0.00258299	-8.93222	4.17533e-19	0.0592643	0.00417705	1.42874e-08	4.66847e-16	37	17	75598365	17	73109960	R			NA	NA								TRUE		17:75598330-75598428	Unclassified_Cell_type_specific	TRUE
cg08763102	-0.0203954	0.0062849	0.00131859	62	455	-0.0266094	0.00441732	2.05149e-09	1840	-0.0225547	0.00335386	2.38541e-11	68	0.00388238	6.26597e-09	-0.0236262	0.00264527	-8.9315	4.20256e-19	0.671486	0.00388238	6.26597e-09	4.68717e-16	37	4	3079751	4	3049549	F	rs78225241		NA	NA	HTT	NM_002111	Body	chr4:3075483-3075773	S_Shelf			NA		4:3079742-3079877	Unclassified_Cell_type_specific	NA
cg10623219	-0.0273797	0.00936041	0.00373001	62	455	-0.0375271	0.00561667	3.1267e-11	1840	-0.0319551	0.00525988	1.52192e-09	68	0.00608875	1.53576e-07	-0.0337301	0.00377733	-8.92963	4.27437e-19	0.605844	0.00608875	1.53576e-07	4.75536e-16	37	12	52242807	12	50529074	F			NA	NA				chr12:52240772-52242547	S_Shore			NA	12:50526886-50529569			NA
cg23360111	-0.0335213	0.00683989	1.62945e-06	62	455	-0.0301127	0.00491749	1.11578e-09	1840	-0.0209759	0.00392926	1.06297e-07	68	0.00454845	3.99443e-06	-0.0267923	0.00300063	-8.9289	4.30272e-19	0.216646	0.00454845	3.99443e-06	4.775e-16	37	14	75828696	14	74898449	F			NA	NA								TRUE				NA
cg25310233	-0.0259778	0.00617921	3.54536e-05	62	455	-0.0188257	0.00452012	3.25956e-05	1840	-0.0317845	0.00394118	1.36558e-15	68	0.00456225	3.2413e-12	-0.0254008	0.00284927	-8.91485	4.88464e-19	0.129863	0.00456225	3.2413e-12	5.40734e-16	37	1	31234437	1	31007024	F			NA	NA								TRUE		1:31233548-31234612	Unclassified	NA
cg10754794	-0.0193434	0.00581192	0.000992762	62	455	-0.0344105	0.00467917	2.88197e-13	1840	-0.0258458	0.00519779	7.27246e-07	68	0.00601688	1.74254e-05	-0.0277766	0.00311739	-8.91019	5.09436e-19	0.121332	0.00601688	1.74254e-05	5.62554e-16	37	10	93916288	10	93906268	F		rs61875206	TRUE	NA	CPEB3	NM_014912	Body					TRUE				NA
cg06998765	-0.0267006	0.00795349	0.000898373	62	455	-0.0383807	0.0053803	1.40047e-12	1840	-0.0244989	0.00463497	1.41308e-07	68	0.00536536	4.96825e-06	-0.0305436	0.00342813	-8.9097	5.11708e-19	0.163287	0.00536536	4.96825e-06	5.63668e-16	37	14	75389618	14	74459371	F			NA	NA	RPS6KL1	NM_031464	TSS1500	chr14:75389712-75390133	N_Shore			NA		14:75389209-75390361	Promoter_Associated	NA
cg19562707	-0.0178426	0.00689413	0.0101621	62	455	-0.0241639	0.0040071	1.97327e-09	1840	-0.0272049	0.00384004	2.02976e-12	68	0.00444517	9.35136e-10	-0.02432	0.00273253	-8.90016	5.57685e-19	0.520621	0.00444517	9.35136e-10	6.12801e-16	37	19	38757961	19	43449801	F	rs73630135	rs73037305	NA	NA	SPINT2;SPINT2	NM_021102;NM_001166103	Body;Body	chr19:38754846-38755699	S_Shelf			TRUE				TRUE
cg26090940	-0.0259935	0.00607058	2.5603e-05	62	455	-0.0307931	0.00406167	5.38828e-14	1840	-0.0147479	0.00396811	0.000208401	68	0.00459341	0.0013243	-0.0242025	0.00272018	-8.8974	5.71697e-19	0.0308602	0.00459341	0.0013243	6.26655e-16	37	12	60130454	12	58416721	R			NA	NA	SLC16A7	NM_004731	Body					TRUE				TRUE
cg23928512	-0.0228256	0.00584811	0.000119426	62	455	-0.0292476	0.00435495	2.4821e-11	1840	-0.0223756	0.004308	2.30444e-07	68	0.00498687	7.22657e-06	-0.025449	0.00286091	-8.89541	5.82025e-19	0.51123	0.00498687	7.22657e-06	6.36412e-16	37	17	79970192	17	77563481	R			NA	NA	ASPSCR1	NM_024083	Body	chr17:79966854-79967138	S_Shelf			NA	17:77563350-77563603			TRUE
cg07479253	-0.0209351	0.00529057	9.65564e-05	62	455	-0.0275677	0.00395053	4.1557e-12	1840	-0.0146012	0.00273207	1.02914e-07	68	0.0031626	3.89663e-06	-0.0198926	0.00223729	-8.89138	6.03563e-19	0.0366498	0.0031626	3.89663e-06	6.58349e-16	37	3	111904892	3	113387582	R			NA	NA	SLC9A10	NM_183061	Body	chr3:111904382-111904845	S_Shore			NA				NA
cg15892280	-0.0198372	0.005275	0.000206945	62	455	-0.0198877	0.00325086	1.15715e-09	1840	-0.0162441	0.00264222	9.74776e-10	68	0.0030586	1.09044e-07	-0.0182398	0.00205214	-8.8882	6.21084e-19	0.678956	0.0030586	1.09044e-07	6.75808e-16	37	21	40180000	21	39101870	F			NA	NA	ETS2	NM_005239	5'UTR	chr21:40177002-40178667	S_Shore			NA		21:40179945-40180198	Promoter_Associated	NA
cg20438663	-0.0148086	0.00612579	0.0162795	62	455	-0.0269984	0.00420032	1.64608e-10	1840	-0.0227825	0.00335011	1.43534e-11	68	0.00387803	4.23479e-09	-0.0229591	0.00258352	-8.88677	6.29099e-19	0.259606	0.00387803	4.23479e-09	6.82864e-16	37	12	49213081	12	47499348	F			NA	NA	CACNB3	NM_000725	Body	chr12:49212162-49212642	S_Shore		RDMR	NA		12:49211518-49213860	Unclassified	NA
cg08924321	-0.0236272	0.00603204	0.000113099	62	455	-0.0276731	0.0042874	1.38477e-10	1840	-0.0194486	0.00344829	1.9847e-08	68	0.00399168	1.10318e-06	-0.0233358	0.00262934	-8.87516	6.98342e-19	0.372673	0.00399168	1.10318e-06	7.56184e-16	37	11	35663067	11	35619643	R			NA	NA								TRUE				NA
cg20234060	-0.0113794	0.00484497	0.0195442	62	455	-0.0206787	0.00316637	8.44348e-11	1840	-0.0198363	0.00296767	3.1329e-11	68	0.00343533	7.73156e-09	-0.0186198	0.00209852	-8.87282	7.13157e-19	0.24889	0.00343533	7.73156e-09	7.70356e-16	37	11	67183546	11	66940122	R			NA	NA	ATPGD1;ATPGD1	NM_020811;NM_001166222	5'UTR;5'UTR	chr11:67182965-67183393	S_Shore			TRUE				NA
cg16679302	-0.00582842	0.00340862	0.0884068	62	455	-0.0146161	0.00199008	3.08789e-13	1840	-0.0137778	0.00229301	2.28054e-09	68	0.00265435	2.0955e-07	-0.0127944	0.00144262	-8.86885	7.39031e-19	0.076091	0.00265435	2.0955e-07	7.96377e-16	37	16	85622276	16	84179777	F			NA	NA								TRUE	16:84179617-84179823			NA
cg15671996	-0.0234573	0.00741353	0.00172944	62	455	-0.0349034	0.0046664	1.14686e-13	1840	-0.0207399	0.00431395	1.66079e-06	68	0.00499376	3.27897e-05	-0.0274554	0.00309761	-8.86341	7.76026e-19	0.0979424	0.00499376	3.27897e-05	8.34228e-16	37	6	30140325	6	30248304	R			NA	NA	TRIM15	NM_033229	3'UTR	chr6:30139718-30140263	S_Shore			TRUE				NA
cg06488536	-0.018164	0.00661121	0.00640147	62	455	-0.0356088	0.00475341	1.05346e-13	1840	-0.0224114	0.0042428	1.4396e-07	68	0.00491139	5.03953e-06	-0.0268952	0.00303458	-8.8629	7.79561e-19	0.0513541	0.00491139	5.03953e-06	8.36014e-16	37	6	147225846	6	147267539	F			NA	NA								TRUE				NA
cg15547825	-0.0247971	0.00929166	0.00806424	62	455	-0.0339021	0.00575614	4.58807e-09	1840	-0.0428789	0.00590997	6.04502e-13	68	0.00684129	3.66515e-10	-0.0352697	0.00397999	-8.86177	7.87571e-19	0.277499	0.00684129	3.66515e-10	8.42578e-16	37	16	85519178	16	84076679	F	rs80257148		NA	NA				chr16:85519109-85519357	Island			NA	16:84076562-84076810			NA
cg17652998	-0.0147492	0.00442372	0.000972781	62	455	-0.027945	0.00393078	1.66256e-12	1840	-0.0205442	0.00379277	6.93258e-08	68	0.00439045	2.87861e-06	-0.0216346	0.00244194	-8.85959	8.03071e-19	0.079599	0.00439045	2.87861e-06	8.55572e-16	37	10	101370592	10	101360582	R			NA	NA	SLC25A28	NM_031212	3'UTR					NA				NA
cg04623297	-0.00959312	0.0044332	0.0313278	62	455	-0.0190861	0.00235075	8.50299e-16	1840	-0.0103271	0.00227054	5.78786e-06	68	0.00262834	8.52533e-05	-0.0144368	0.00162952	-8.85953	8.03552e-19	0.0229327	0.00262834	8.52533e-05	8.55572e-16	37	2	102051587	2	101418019	F			NA	NA	RFX8	NM_001145664	Body					TRUE	2:101417950-101418060			NA
cg05106502	-0.0196665	0.00630238	0.00199696	62	455	-0.0311953	0.00464619	2.51193e-11	1840	-0.0225719	0.00379653	3.33485e-09	68	0.0043948	2.80586e-07	-0.025219	0.00284814	-8.85454	8.40328e-19	0.247399	0.0043948	2.80586e-07	8.92599e-16	37	17	46506947	17	43861946	F			NA	TRUE	SKAP1;SKAP1	NM_003726;NM_001075099	Body;Body	chr17:46507344-46507778	N_Shore			TRUE		17:46506343-46508297	Promoter_Associated_Cell_type_specific	NA
cg21109038	-0.0282711	0.00971972	0.00392536	62	455	-0.0255726	0.00320668	2.65682e-15	1840	-0.0132942	0.00313506	2.34926e-05	68	0.00362909	0.000249053	-0.0206548	0.00233276	-8.8542	8.42894e-19	0.0290192	0.00362909	0.000249053	8.93198e-16	37	15	90543610	15	88344614	R			NA	NA	ZNF710	NM_198526	TSS1500	chr15:90543410-90543835	Island			NA	15:88344415-88345165			NA
cg08241465	-0.026131	0.00689073	0.000183453	62	455	-0.0336084	0.00551017	1.29493e-09	1840	-0.0307093	0.00506275	1.6128e-09	68	0.00586056	1.60576e-07	-0.030698	0.00346871	-8.84998	8.75348e-19	0.698286	0.00586056	1.60576e-07	9.23363e-16	37	16	57924256	16	56481757	F			NA	NA	CNGB1	NM_001297	Body					TRUE				NA
cg25913647	-0.0225638	0.00559966	7.2337e-05	62	455	-0.0279245	0.00441559	3.19025e-10	1840	-0.0190469	0.00333224	1.2842e-08	68	0.00385735	7.89936e-07	-0.0228203	0.00257865	-8.84972	8.77403e-19	0.317394	0.00385735	7.89936e-07	9.23363e-16	37	5	76248131	5	76283887	F		rs75604502	NA	NA	CRHBP	NM_001882	TSS1500	chr5:76249435-76250528	N_Shore			NA				NA
cg06346335	-0.0299804	0.00879121	0.000745995	62	455	-0.0364719	0.00566888	1.58375e-10	1840	-0.0397115	0.0067287	4.32452e-09	68	0.00778903	3.42564e-07	-0.0359665	0.00406425	-8.84947	8.79359e-19	0.703711	0.00778903	3.42564e-07	9.23363e-16	37	1	76489892	1	76262480	R			NA	NA								TRUE				NA
cg20627046	-0.0158239	0.00862869	0.0677504	62	455	-0.0431241	0.00583849	2.27942e-13	1840	-0.0353498	0.00584785	1.83038e-09	68	0.00676937	1.76976e-07	-0.0348205	0.00393477	-8.84943	8.7964e-19	0.0321336	0.00676937	1.76976e-07	9.23363e-16	37	2	201271178	2	200979423	F			NA	NA	SPATS2L;SPATS2L;SPATS2L;SPATS2L	NM_001100422;NM_015535;NM_001100424;NM_001100423	Body;Body;Body;Body					TRUE				NA
cg17459387	-0.0159659	0.00803238	0.0478332	62	455	-0.0342193	0.00460542	1.65118e-13	1840	-0.0263036	0.00470871	2.69523e-08	68	0.00545072	1.39504e-06	-0.0285151	0.00322237	-8.84913	8.82057e-19	0.126213	0.00545072	1.39504e-06	9.23727e-16	37	17	79134666	17	76749261	F			NA	NA	AATK	NM_001080395	Body	chr17:79133094-79133348	S_Shore			NA	17:76748645-76749389	17:79134028-79134941	Unclassified_Cell_type_specific	NA
cg25157472	-0.0192222	0.00524676	0.000298086	62	455	-0.0205172	0.00389429	1.53657e-07	1840	-0.0242415	0.00340406	1.5669e-12	68	0.00394048	7.65584e-10	-0.021674	0.00244948	-8.84842	8.87688e-19	0.693799	0.00394048	7.65584e-10	9.27447e-16	37	3	12996362	3	12971362	R			NA	NA	IQSEC1;IQSEC1	NM_001134382;NM_014869	Body;Body					TRUE		3:12996265-12996417	Unclassified_Cell_type_specific	TRUE
cg24848615	-0.0348053	0.00810152	2.4107e-05	62	455	-0.0375888	0.0055736	2.05534e-11	1840	-0.0241304	0.0050132	1.61452e-06	68	0.0058032	3.20881e-05	-0.0318569	0.00360094	-8.84684	9.00326e-19	0.227328	0.0058032	3.20881e-05	9.38453e-16	37	19	3368396	19	3319396	R			NA	NA	NFIC;NFIC	NM_005597;NM_205843	Body;Body	chr19:3369477-3369913	N_Shore			TRUE				NA
cg17457912	-0.00819686	0.00583573	0.161265	62	455	-0.0259278	0.00367154	2.32065e-12	1840	-0.0214882	0.00323278	4.0091e-11	68	0.00374221	9.35033e-09	-0.0211399	0.00239077	-8.84228	9.37865e-19	0.036365	0.00374221	9.35033e-09	9.75303e-16	37	17	1617102	17	1563852	R			NA	NA	C17orf91;C17orf91;C17orf91;C17orf91	NR_028505;NR_028503;NR_028504;NR_028502	Body;Body;Body;Body	chr17:1619204-1620062	N_Shelf			NA		17:1616470-1617872	Unclassified	NA
cg07944862	-0.0145561	0.00658223	0.0278257	62	455	-0.0287487	0.00464833	7.6455e-10	1840	-0.0304583	0.0042014	6.30031e-13	68	0.00486347	3.78434e-10	-0.0264619	0.00299289	-8.84158	9.43735e-19	0.123137	0.00486347	3.78434e-10	9.78733e-16	37	17	38501174	17	35754700	R			NA	NA	RARA;RARA;RARA;RARA	NM_001145301;NM_000964;NM_001024809;NM_001145302	Body;Body;Body;Body	chr17:38501396-38501839	N_Shore			TRUE		17:38500943-38502323	Unclassified	NA
cg11269166	-0.0239874	0.00721709	0.00100841	62	455	-0.0293945	0.00372407	5.01827e-15	1840	-0.0147387	0.00378232	0.000101249	68	0.00437835	0.000761916	-0.0233421	0.00264011	-8.84137	9.45551e-19	0.0385716	0.00437835	0.000761916	9.78733e-16	37	2	172203847	2	171912093	R			NA	NA	METTL8	NM_024770	Body					TRUE				NA
cg01447828	-0.0228617	0.00934834	0.0150885	62	455	-0.0489328	0.00649424	7.62558e-14	1840	-0.0325653	0.00607466	9.4088e-08	68	0.00703193	3.63787e-06	-0.0375683	0.00424949	-8.84067	9.51472e-19	0.0487195	0.00703193	3.63787e-06	9.82582e-16	37	19	40919465	19	45611305	R			NA	NA	PRX;PRX	NM_181882;NM_020956	TSS200;TSS200					TRUE				NA
cg09084200	-0.0197521	0.00478018	4.77104e-05	62	455	-0.0185157	0.00323674	1.23732e-08	1840	-0.0185777	0.00301721	9.20019e-10	68	0.00349267	1.04304e-07	-0.0187833	0.00212626	-8.83396	1.01031e-18	0.974639	0.00349267	1.04304e-07	1.04077e-15	37	11	134095863	11	133601073	R			NA	TRUE	VPS26B;NCAPD3	NM_052875;NM_015261	Body;TSS1500	chr11:134093696-134095491	S_Shore			NA				NA
cg22190721	-0.0179974	0.00601013	0.00299819	62	455	-0.030746	0.00410774	1.10395e-13	1840	-0.0200711	0.00415995	1.52542e-06	68	0.00481549	3.07236e-05	-0.0244935	0.00277273	-8.83372	1.01248e-18	0.114836	0.00481549	3.07236e-05	1.04077e-15	37	16	68269295	16	66826796	F			NA	NA	ESRP2	NM_024939	Body	chr16:68269010-68272143	Island		RDMR	NA	16:66826526-66829595	16:68268909-68269458	Unclassified_Cell_type_specific	NA
cg00753287	-0.0163249	0.00556037	0.00360543	62	455	-0.0273531	0.00350321	9.67804e-15	1840	-0.0148652	0.00332313	8.20998e-06	68	0.0038468	0.000111402	-0.0207348	0.00234788	-8.83127	1.03492e-18	0.0382683	0.0038468	0.000111402	1.06139e-15	37	10	126749347	10	126739337	F			NA	NA	CTBP2;CTBP2	NM_001083914;NM_001329	5'UTR;5'UTR					NA	10:126739217-126739434			NA
cg10090414	-0.0276822	0.00836347	0.00105744	62	455	-0.0205726	0.00365978	2.18593e-08	1840	-0.0241668	0.00346911	4.62389e-12	68	0.00401579	1.76649e-09	-0.0227222	0.00257371	-8.82857	1.06022e-18	0.661632	0.00401579	1.76649e-09	1.08434e-15	37	8	142309652	8	142378834	R			NA	NA								TRUE	8:142378672-142378870	8:142309178-142310227	Gene_Associated_Cell_type_specific	TRUE
cg16672637	-0.0135038	0.0051397	0.00908669	62	455	-0.0221944	0.00336854	5.77388e-11	1840	-0.0180135	0.0028527	3.44405e-10	68	0.00330224	4.89896e-08	-0.0189219	0.00214331	-8.82837	1.06217e-18	0.3446	0.00330224	4.89896e-08	1.08434e-15	37	17	74138356	17	71649951	R			NA	NA	FOXJ1	NM_001454	TSS1500	chr17:74135922-74137802	S_Shore		RDMR	TRUE				NA
cg15283950	-0.0367385	0.008484	2.08554e-05	62	455	-0.035736	0.00558877	2.04016e-10	1840	-0.0287356	0.00567585	4.57662e-07	68	0.00657027	1.22226e-05	-0.03359	0.00380489	-8.8281	1.0647e-18	0.659991	0.00657027	1.22226e-05	1.08446e-15	37	11	10715217	11	10671793	R			NA	NA	MRVI1;MRVI1;MRVI1;MRVI1;MRVI1	NM_001100163;NM_001100163;NM_130385;NM_130385;NM_001100167	1stExon;5'UTR;1stExon;5'UTR;TSS200			low-CpG:10671608-10672092		TRUE				NA
cg18877271	-0.0393762	0.0108107	0.000322627	62	455	-0.0436386	0.00646838	2.02289e-11	1840	-0.0472482	0.00927976	3.94299e-07	68	0.0107421	1.09043e-05	-0.0435124	0.00493125	-8.8238	1.10642e-18	0.874717	0.0107421	1.09043e-05	1.12438e-15	37	11	1952638	11	1909214	R			NA	NA	TNNT3;TNNT3;TNNT3;TNNT3	NM_001042781;NM_006757;NM_001042780;NM_001042782	Body;Body;Body;Body	chr11:1950353-1950658	S_Shore			NA	11:1909189-1909342			NA
cg03031932	-0.0130002	0.00572514	0.0239346	62	455	-0.0331464	0.00432247	2.80266e-14	1840	-0.0207459	0.00377045	4.31707e-08	68	0.00436461	2.00207e-06	-0.0238764	0.00270641	-8.82217	1.12266e-18	0.0127612	0.00436461	2.00207e-06	1.13829e-15	37	16	81547138	16	80104639	R			NA	NA	CMIP;CMIP	NM_030629;NM_198390	Body;Body					TRUE				NA
cg23693485	-0.0260946	0.005721	7.65678e-06	62	455	-0.0232858	0.0043101	7.42174e-08	1840	-0.0255834	0.00418486	1.20568e-09	68	0.00484432	1.28403e-07	-0.0247325	0.00280612	-8.81379	1.20985e-18	0.904747	0.00484432	1.28403e-07	1.22391e-15	37	6	13381043	6	13489022	R			NA	NA	GFOD1	NM_018988	Body					TRUE				NA
cg12258344	-0.0154348	0.00521335	0.00333682	62	455	-0.0235568	0.00365157	1.4153e-10	1840	-0.0218232	0.00351247	6.50895e-10	68	0.00406597	7.99363e-08	-0.0212135	0.00240927	-8.80496	1.30898e-18	0.435412	0.00406597	7.99363e-08	1.3212e-15	37	2	47550528	2	47404032	R			NA	NA								TRUE		2:47550224-47551053	Unclassified	NA
cg08270630	-0.0281876	0.00658834	2.59791e-05	62	455	-0.0222307	0.00425712	1.97046e-07	1840	-0.0208624	0.00314276	4.24751e-11	68	0.00363801	9.77607e-09	-0.0224508	0.00255011	-8.80386	1.32194e-18	0.621414	0.00363801	9.77607e-09	1.33006e-15	37	22	50330655	22	48716659	R			NA	NA				chr22:50328693-50329178	S_Shore			TRUE				NA
cg25424279	-0.014623	0.00629006	0.0208096	62	455	-0.0283626	0.00425557	3.49077e-11	1840	-0.025615	0.00397258	1.47051e-10	68	0.00459859	2.54469e-08	-0.0246281	0.00279748	-8.8037	1.32372e-18	0.187659	0.00459859	2.54469e-08	1.33006e-15	37	11	65683543	11	65440119	F			NA	NA				chr11:65685100-65685364	N_Shore		RDMR	TRUE				TRUE
cg22032961	-0.0215458	0.00648858	0.00101934	62	455	-0.0302639	0.00472477	1.89985e-10	1840	-0.0244956	0.00409137	2.59595e-09	68	0.00473611	2.31477e-07	-0.0261604	0.00297312	-8.79897	1.38075e-18	0.500658	0.00473611	2.31477e-07	1.38191e-15	37	1	207152909	1	205219532	F			NA	NA								TRUE		1:207152837-207153791	Unclassified_Cell_type_specific	NA
cg16295156	-0.0246361	0.00536764	6.74577e-06	62	455	-0.0249002	0.00373822	3.58157e-11	1840	-0.0154893	0.00340105	5.62759e-06	68	0.003937	8.34408e-05	-0.0212914	0.00241978	-8.79891	1.38153e-18	0.174462	0.003937	8.34408e-05	1.38191e-15	37	1	9466328	1	9388915	R			NA	NA								NA		1:9466294-9466398	Unclassified_Cell_type_specific	NA
cg06601581	-0.0175609	0.00827225	0.0346549	62	455	-0.0441357	0.0061144	7.66539e-13	1840	-0.0390487	0.00640799	1.35929e-09	68	0.00741779	1.40801e-07	-0.0360598	0.00409838	-8.79856	1.3858e-18	0.0316234	0.00741779	1.40801e-07	1.38309e-15	37	16	85404654	16	83962155	R			NA	NA				chr16:85407314-85407576	N_Shelf			TRUE				NA
cg20722590	-0.0275419	0.00728253	0.000190812	62	455	-0.0338566	0.00494461	1.02305e-11	1840	-0.0208061	0.00403575	2.82325e-07	68	0.00467171	8.44271e-06	-0.027065	0.00307764	-8.79407	1.44234e-18	0.158359	0.00467171	8.44271e-06	1.4363e-15	37	16	58061473	16	56618974	R			NA	NA	MMP15	NM_002428	Body	chr16:58059380-58061477	Island			NA	16:56616818-56618978			NA
cg19495650	-0.0264046	0.00822652	0.00148568	62	455	-0.0344548	0.0071568	1.59806e-06	1840	-0.0363925	0.0046929	1.5074e-14	68	0.00543242	2.09647e-11	-0.0336732	0.0038296	-8.79288	1.45775e-18	0.593578	0.00543242	2.09647e-11	1.44842e-15	37	10	65226682	10	64896688	R			NA	NA	JMJD1C	NM_032776	TSS1500	chr10:65224870-65225887	S_Shore			NA				NA
cg04260867	-0.0110606	0.00737114	0.134621	62	455	-0.0422783	0.00496839	3.56638e-17	1840	-0.0203659	0.00406809	6.1207e-07	68	0.00470915	1.52702e-05	-0.027254	0.00310073	-8.78953	1.50182e-18	0.000317484	0.00470915	1.52702e-05	1.48889e-15	37	1	33004424	1	32777011	F			NA	NA	ZBTB8A	NM_001040441	TSS1500	chr1:33005423-33005739	N_Shore			NA		1:33004358-33005040	Unclassified_Cell_type_specific	NA
cg10788371	-0.0274118	0.00973031	0.00519501	62	455	-0.0373964	0.00611139	1.1468e-09	1840	-0.0381314	0.00575332	4.55339e-11	68	0.00665995	1.03143e-08	-0.035912	0.00408651	-8.78795	1.52318e-18	0.627134	0.00665995	1.03143e-08	1.50672e-15	37	11	76381040	11	76058688	F			NA	NA	LRRC32;LRRC32;LRRC32	NM_001128922;NM_005512;NM_005512	5'UTR;1stExon;5'UTR	chr11:76381449-76382295	N_Shore	low-CpG:76058599-76058717		NA				TRUE
cg02544002	-0.0202803	0.00759655	0.00804259	62	455	-0.037334	0.00501019	1.41109e-13	1840	-0.0227662	0.00439971	2.55441e-07	68	0.00509304	7.81974e-06	-0.0283792	0.00323223	-8.78005	1.63408e-18	0.0624826	0.00509304	7.81974e-06	1.61284e-15	37	3	129323778	3	130806468	F			NA	NA	PLXND1	NM_015103	Body	chr3:129323915-129325332	N_Shore			NA				NA
cg06477069	-0.0166341	0.00741227	0.0256172	62	455	-0.0317289	0.00491802	1.41157e-10	1840	-0.0297829	0.00445207	3.01933e-11	68	0.00515364	7.51456e-09	-0.0281484	0.00320756	-8.77563	1.69944e-18	0.218305	0.00515364	7.51456e-09	1.67364e-15	37	20	35493378	20	34926792	F			NA	NA	C20orf117	NM_080627	TSS1500	chr20:35491001-35492805	S_Shore			NA				NA
cg05797770	-0.0129847	0.00810849	0.110439	62	455	-0.029224	0.00414018	2.37337e-12	1840	-0.0299442	0.00487479	1.00674e-09	68	0.00564298	1.11783e-07	-0.0270861	0.00308676	-8.77493	1.71017e-18	0.169687	0.00564298	1.11783e-07	1.6805e-15	37	1	16470667	1	16343254	F	rs74754043		NA	NA	EPHA2	NM_004431	Body					NA		1:16470559-16470891	Unclassified_Cell_type_specific	NA
cg02870946	-0.0373412	0.0103242	0.000354493	62	455	-0.0485555	0.00661091	3.08193e-13	1840	-0.0269154	0.00604894	9.15724e-06	68	0.00700216	0.000121111	-0.0381759	0.00435778	-8.76039	1.94573e-18	0.0797468	0.00700216	0.000121111	1.90778e-15	37	18	77289084	18	75390072	F			NA	NA	NFATC1;NFATC1;NFATC1;NFATC1	NM_172388;NM_172387;NM_172389;NM_006162	3'UTR;3'UTR;3'UTR;3'UTR	chr18:77289018-77289464	Island			NA	18:75389970-75390203	18:77288475-77289295	Gene_Associated	NA
cg00542975	-0.0311822	0.00819984	0.000176169	62	455	-0.0305654	0.00486571	4.16655e-10	1840	-0.0240039	0.00424322	1.80178e-08	68	0.00491188	1.02431e-06	-0.0278991	0.00318531	-8.75868	1.97544e-18	0.579998	0.00491188	1.02431e-06	1.93266e-15	37	2	122392291	2	122108761	R			NA	NA	CLASP1;CLASP1;CLASP1	NM_015282;NM_001142274;NM_001142273	5'UTR;5'UTR;5'UTR					TRUE				NA
cg15730857	-0.0259444	0.00656734	9.90886e-05	62	455	-0.0323538	0.00495546	8.5448e-11	1840	-0.0259868	0.00511488	4.17262e-07	68	0.0059209	1.13874e-05	-0.0287812	0.00328917	-8.75029	2.12811e-18	0.628429	0.0059209	1.13874e-05	2.07747e-15	37	7	116592968	7	116380204	R			NA	NA	ST7OT4;ST7OT1;ST7;ST7	NR_002329;NR_002330;NM_021908;NM_018412	TSS1500;Body;TSS1500;TSS1500	chr7:116593880-116594325	N_Shore		CDMR	NA		7:116592906-116594586	Promoter_Associated	NA
cg15359093	-0.0217843	0.00716077	0.00257483	62	455	-0.0363983	0.00547923	4.03646e-11	1840	-0.0314558	0.00535326	5.03953e-09	68	0.00619685	3.85272e-07	-0.0311516	0.00356118	-8.74756	2.18015e-18	0.268401	0.00619685	3.85272e-07	2.12362e-15	37	2	66894360	2	66747864	F			NA	NA								TRUE				NA
cg05851887	-0.0168087	0.0053973	0.00203801	62	455	-0.0247501	0.00352011	2.87787e-12	1840	-0.0156172	0.00293418	1.1584e-07	68	0.00339656	4.26646e-06	-0.019474	0.00222656	-8.7462	2.20655e-18	0.151093	0.00339656	4.26646e-06	2.14262e-15	37	22	28199970	22	26529970	F			NA	NA				chr22:28192793-28198592	S_Shore		RDMR	TRUE				NA
cg07828377	-0.0252264	0.0088906	0.0048852	62	455	-0.0404098	0.0055294	4.01739e-13	1840	-0.0286654	0.00584186	1.01313e-06	68	0.00676244	2.24605e-05	-0.0337322	0.00385684	-8.74606	2.20925e-18	0.230487	0.00676244	2.24605e-05	2.14262e-15	37	17	109496	17	109496	R			NA	NA	RPH3AL	NM_006987	Body					TRUE	17:109444-109553			NA
cg27433482	-0.0168553	0.00476871	0.000478779	62	455	-0.022255	0.00362039	9.65016e-10	1840	-0.0184941	0.00306523	1.9618e-09	68	0.00354826	1.86661e-07	-0.0195701	0.00223777	-8.74533	2.2236e-18	0.616913	0.00354826	1.86661e-07	2.15185e-15	37	1	211498962	1	209565585	R			NA	NA	TRAF5;TRAF5	NM_004619;NM_001033910	TSS1500;TSS1500	chr1:211500151-211500636	N_Shore			NA		1:211498944-211499108	Unclassified_Cell_type_specific	NA
cg24956391	-0.0300783	0.00804619	0.000225302	62	455	-0.0300154	0.0043445	6.70946e-12	1840	-0.0171034	0.00325937	1.734e-07	68	0.00377299	5.81173e-06	-0.0234817	0.00268536	-8.74435	2.24303e-18	0.0552533	0.00377299	5.81173e-06	2.16596e-15	37	20	36011999	20	35445413	F			NA	NA	SRC;SRC	NM_198291;NM_005417	5'UTR;5'UTR	chr20:36012595-36013439	N_Shore	low-CpG:35445350-35445433		NA		20:36011903-36012034	Unclassified_Cell_type_specific	NA
cg13705284	-0.0230541	0.00640669	0.000379316	62	455	-0.0324709	0.00532007	1.26261e-09	1840	-0.0298449	0.00491248	1.52124e-09	68	0.00568661	1.53523e-07	-0.029043	0.00332193	-8.74281	2.27384e-18	0.519736	0.00568661	1.53523e-07	2.19096e-15	37	3	58523313	3	58498353	F	rs5021434		NA	TRUE	ACOX2	NM_003500	TSS1500					NA				NA
cg07045089	-0.0301635	0.00784704	0.000150342	62	455	-0.0268221	0.00556931	1.58411e-06	1840	-0.0224217	0.00308774	5.78193e-13	68	0.00357431	3.54111e-10	-0.0245329	0.00280879	-8.73431	2.45142e-18	0.596701	0.00357431	3.54111e-10	2.35698e-15	37	1	3620218	1	3610078	R			NA	NA	TP73;TP73;TP73;TP73	NM_001126240;NM_005427;NM_001126242;NM_001126241	Body;Body;Body;Body	chr1:3623318-3623521	N_Shelf			NA		1:3619980-3620274	Unclassified_Cell_type_specific	TRUE
cg00263619	-0.0194214	0.0055686	0.000566836	62	455	-0.0317049	0.00498069	2.45041e-10	1840	-0.0197784	0.00324091	1.28656e-09	68	0.00375162	1.34973e-07	-0.023046	0.00263882	-8.73345	2.47028e-18	0.12217	0.00375162	1.34973e-07	2.37001e-15	37	12	94727462	12	93251593	F			NA	NA	CCDC41;CCDC41	NM_001042399;NM_016122	Body;Body					TRUE				NA
cg01218206	-0.0216001	0.00809157	0.00804762	62	455	-0.047816	0.0056922	8.77885e-17	1840	-0.0219486	0.00607133	0.000308889	68	0.00702807	0.00179024	-0.033895	0.00388128	-8.73294	2.48127e-18	0.00373638	0.00702807	0.00179024	2.37545e-15	37	11	116933977	11	116439187	R			NA	NA	SIK3	NM_025164	Body					TRUE		11:116933852-116934163	Unclassified	NA
cg20558112	-0.0174562	0.00717234	0.0155751	62	455	-0.0270411	0.00437925	8.1305e-10	1840	-0.0281467	0.0041778	2.19806e-11	68	0.00483615	5.88293e-09	-0.025825	0.00295735	-8.73246	2.49184e-18	0.434082	0.00483615	5.88293e-09	2.37961e-15	37	13	45968589	13	44866589	R			NA	NA	SLC25A30	NM_001010875	3'UTR	chr13:45965248-45965559	S_Shelf			NA		13:45967843-45968792	Gene_Associated	NA
cg01079060	-0.0319808	0.0082428	0.000130775	62	455	-0.0330397	0.00616686	9.49245e-08	1840	-0.0403107	0.00603405	3.2086e-11	68	0.00698492	7.87518e-09	-0.0352092	0.00403208	-8.73226	2.49629e-18	0.666777	0.00698492	7.87518e-09	2.37961e-15	37	7	139437439	7	139083909	F	rs73158615		NA	NA	HIPK2;HIPK2	NM_001113239;NM_022740	Body;Body					TRUE				NA
cg24009074	-0.0054665	0.00386071	0.157923	62	455	-0.0129304	0.00148372	6.37012e-18	1840	-0.00592457	0.00205696	0.00402301	68	0.00238111	0.0128407	-0.0104417	0.00119718	-8.72188	2.73618e-18	0.0176587	0.00238111	0.0128407	2.5955e-15	37	19	48000364	19	52692176	R			TRUE	NA	NAPA	NM_003827	Body					NA				NA
cg20512303	-0.0332967	0.00754963	1.48032e-05	62	455	-0.0279717	0.0050256	2.9925e-08	1840	-0.0294497	0.0049907	4.34764e-09	68	0.00577715	3.43969e-07	-0.0295527	0.00338836	-8.72183	2.73731e-18	0.841465	0.00577715	3.43969e-07	2.5955e-15	37	5	131592959	5	131620858	R			NA	TRUE	PDLIM4;PDLIM4	NM_001131027;NM_003687	TSS1500;TSS1500	chr5:131593039-131593813	N_Shore			NA				NA
cg19211880	-0.0198237	0.00885939	0.0260454	62	455	-0.0372845	0.00535639	4.69089e-12	1840	-0.0382254	0.00649351	4.72981e-09	68	0.00751678	3.66958e-07	-0.0341324	0.0039135	-8.72171	2.74022e-18	0.196784	0.00751678	3.66958e-07	2.5955e-15	37	3	134088357	3	135571047	F	rs74725592		NA	NA	AMOTL2	NM_016201	Body	chr3:134092257-134093741	N_Shelf			NA				TRUE
cg12573289	-0.021174	0.00480852	1.52521e-05	62	455	-0.0202011	0.00327274	8.24591e-10	1840	-0.0150253	0.00288606	2.16001e-07	68	0.00334085	6.87698e-06	-0.0183371	0.00210255	-8.72139	2.74795e-18	0.43711	0.00334085	6.87698e-06	2.59731e-15	37	7	45075791	7	45042316	F			NA	NA	CCM2;CCM2;CCM2;CCM2;CCM2	NM_031443;NM_001029835;NM_001167935;NM_001167934;NR_030770	Body;Body;Body;Body;Body					TRUE		7:45075681-45075909	Promoter_Associated_Cell_type_specific	NA
cg00821310	-0.00643587	0.00692666	0.353626	62	455	-0.0420194	0.00502256	1.16085e-16	1840	-0.0286007	0.00520985	4.62845e-08	68	0.00603084	2.11189e-06	-0.029396	0.00337141	-8.71919	2.802e-18	0.000173225	0.00603084	2.11189e-06	2.6428e-15	37	1	6420733	1	6343320	F			NA	NA	ACOT7;ACOT7;ACOT7;ACOT7	NM_181864;NM_181865;NM_181865;NM_007274	Body;5'UTR;1stExon;Body					NA				NA
cg03851401	-0.0255991	0.00586422	1.7966e-05	62	455	-0.0246638	0.00389814	3.12966e-10	1840	-0.0153383	0.00287643	1.09808e-07	68	0.00332971	4.09517e-06	-0.0202662	0.00232442	-8.7188	2.81159e-18	0.117065	0.00332971	4.09517e-06	2.6428e-15	37	22	28200653	22	26530653	F			NA	NA				chr22:28192793-28198592	S_Shelf		RDMR	NA	22:26530530-26530844	22:28200001-28201250	Unclassified	NA
cg14099685	-0.0138513	0.00424272	0.00123391	62	455	-0.0205744	0.00303636	1.65757e-11	1840	-0.0133598	0.002414	3.6092e-08	68	0.00279441	1.74518e-06	-0.0161325	0.00185033	-8.71871	2.81385e-18	0.181435	0.00279441	1.74518e-06	2.6428e-15	37	11	47546068	11	47502644	R			NA	NA	CUGBP1	NM_006560	5'UTR					TRUE		11:47545062-47546460	Promoter_Associated	NA
cg02301528	-0.0253531	0.00606414	3.90367e-05	62	455	-0.0317305	0.00495447	1.91149e-10	1840	-0.0251023	0.00504114	7.01726e-07	68	0.00583554	1.69552e-05	-0.0279476	0.0032059	-8.71758	2.84221e-18	0.60539	0.00583554	1.69552e-05	2.66383e-15	37	12	12939519	12	12830786	R			NA	NA	APOLD1;APOLD1	NM_001130415;NM_030817	Body;Body	chr12:12939713-12940391	N_Shore			TRUE		12:12939380-12942411	Promoter_Associated	NA
cg20811236	-0.0359634	0.0127538	0.00515343	62	455	-0.048736	0.00784528	6.4468e-10	1840	-0.0566762	0.00878926	1.46686e-10	68	0.0101743	2.53983e-08	-0.0486793	0.00558533	-8.71555	2.89341e-18	0.446667	0.0101743	2.53983e-08	2.70613e-15	37	18	46501400	18	44755398	F			NA	NA				chr18:46501624-46502976	N_Shore		DMR	NA	18:44755333-44755488			NA
cg16417374	-0.0235469	0.0084411	0.00564553	62	455	-0.0364451	0.00548397	3.96209e-11	1840	-0.0291329	0.00494991	4.76277e-09	68	0.00572994	3.6892e-07	-0.031252	0.00358647	-8.71386	2.93692e-18	0.393231	0.00572994	3.6892e-07	2.73551e-15	37	1	26098310	1	25970897	R			NA	NA	MAN1C1	NM_020379	Body	chr1:26097904-26098107	S_Shore			NA	1:25970880-25970913	1:26097709-26098327	Unclassified_Cell_type_specific	NA
cg11942936	-0.0175511	0.00769325	0.0232884	62	455	-0.0282154	0.00472222	2.75559e-09	1840	-0.0305723	0.00433636	2.58084e-12	68	0.0050197	1.12587e-09	-0.0273611	0.00313996	-8.71386	2.93709e-18	0.355592	0.0050197	1.12587e-09	2.73551e-15	37	10	77169689	10	76839695	F			NA	NA				chr10:77155128-77169600	S_Shore		RDMR	NA		10:77168798-77169714	Unclassified	NA
cg23900712	-0.0360425	0.00713166	7.89148e-07	62	455	-0.0279836	0.00498336	2.26007e-08	1840	-0.0243935	0.00465676	1.82091e-07	68	0.00539059	6.03362e-06	-0.0283536	0.00325571	-8.70887	3.06912e-18	0.425799	0.00539059	6.03362e-06	2.85252e-15	37	15	99344807	15	97162330	R			NA	NA	IGF1R	NM_000875	Body					TRUE		15:99344782-99344833	Unclassified_Cell_type_specific	NA
cg09063663	-0.0119207	0.00547663	0.0303548	62	455	-0.0219114	0.0031283	3.46911e-12	1840	-0.0180571	0.00314445	1.10139e-08	68	0.00363997	7.02124e-07	-0.018954	0.002177	-8.70648	3.13452e-18	0.272026	0.00363997	7.02124e-07	2.90725e-15	37	1	16484811	1	16357398	F			NA	NA				chr1:16481484-16482782	S_Shelf			NA		1:16484484-16484891	Unclassified_Cell_type_specific	NA
cg24150385	-0.0243261	0.00640708	0.000180287	62	455	-0.0367794	0.00597102	8.93175e-10	1840	-0.029514	0.00506189	6.58561e-09	68	0.00585956	4.73136e-07	-0.0304633	0.00350213	-8.69852	3.36244e-18	0.356522	0.00585956	4.73136e-07	3.11218e-15	37	3	66543263	3	66625953	F			NA	NA	LRIG1	NM_015541	Body					TRUE				NA
cg00933182	-0.0218747	0.00708449	0.00222258	62	455	-0.0333547	0.00506885	6.10187e-11	1840	-0.023346	0.00399172	5.92455e-09	68	0.00462075	4.36231e-07	-0.0267547	0.00307612	-8.69757	3.39081e-18	0.257423	0.00462075	4.36231e-07	3.13153e-15	37	17	43298345	17	40654128	R			NA	NA	FMNL1	NM_005892	TSS1500	chr17:43298725-43299640	N_Shore		RDMR	NA		17:43298159-43298346	Promoter_Associated_Cell_type_specific	NA
cg20830848	-0.0114965	0.00621454	0.0653906	62	455	-0.0282237	0.00368021	2.78864e-14	1840	-0.0170794	0.00324384	1.57726e-07	68	0.00375501	5.40481e-06	-0.0210541	0.00242075	-8.69735	3.39739e-18	0.0262399	0.00375501	5.40481e-06	3.13153e-15	37	7	134853645	7	134504185	R			NA	NA	C7orf49;C7orf49;C7orf49	NR_024185;NR_024186;NM_024033	Body;Body;Body	chr7:134854975-134855696	N_Shore			TRUE		7:134853565-134854514	Promoter_Associated	NA
cg00443094	-0.01741	0.0046771	0.000239172	62	455	-0.019988	0.00368293	6.48262e-08	1840	-0.0181203	0.00274492	5.41612e-11	68	0.00317747	1.17899e-08	-0.0186019	0.00213939	-8.69497	3.4692e-18	0.891558	0.00317747	1.17899e-08	3.19113e-15	37	4	1771149	4	1740947	R			NA	NA				chr4:1772006-1772265	N_Shore			TRUE				NA
cg26257411	-0.0152262	0.00441775	0.000656169	62	455	-0.0217431	0.00369494	4.73111e-09	1840	-0.0223149	0.00347548	1.7524e-10	68	0.00402316	2.91254e-08	-0.0201401	0.00231703	-8.6922	3.55491e-18	0.423649	0.00402316	2.91254e-08	3.25311e-15	37	6	33397122	6	33505100	F			NA	NA	SYNGAP1	NM_006772	Body	chr6:33396050-33396296	S_Shore			NA		6:33397014-33397949	Promoter_Associated	NA
cg03613618	-0.0272758	0.00644526	3.15719e-05	62	455	-0.0355825	0.00492305	7.16527e-13	1840	-0.0189648	0.00516786	0.000250211	68	0.00598223	0.00152339	-0.0284605	0.00327428	-8.69214	3.55686e-18	0.0979684	0.00598223	0.00152339	3.25311e-15	37	8	97658325	8	97727501	F			NA	NA	PGCP	NM_016134	5'UTR	chr8:97657174-97657943	S_Shore		RDMR	NA		8:97656859-97658471	Promoter_Associated	NA
cg10474597	-0.0266529	0.00703634	0.000186504	62	455	-0.0470584	0.0064482	4.32662e-13	1840	-0.0319409	0.00769858	3.50403e-05	68	0.00891175	0.000338201	-0.0364584	0.00419444	-8.69209	3.55846e-18	0.0862394	0.00891175	0.000338201	3.25311e-15	37	13	51917676	13	50815677	F			NA	NA	SERPINE3	NM_001101320	Body					TRUE				NA
cg16047471	-0.0350028	0.00789317	1.33335e-05	62	455	-0.0318831	0.00552785	9.40509e-09	1840	-0.0274435	0.00491576	2.74753e-08	68	0.0056904	1.41576e-06	-0.0307905	0.00354309	-8.6903	3.61489e-18	0.715404	0.0056904	1.41576e-06	3.29794e-15	37	12	26274563	12	26165830	R			NA	NA	BHLHE41	NM_030762	3'UTR	chr12:26275049-26275878	N_Shore		RDMR	NA				NA
cg05508558	-0.0185973	0.00644527	0.0042174	62	455	-0.0275727	0.00468698	4.78013e-09	1840	-0.034369	0.00495434	5.65278e-12	68	0.00573507	2.06295e-09	-0.0274784	0.00316233	-8.68931	3.6466e-18	0.188002	0.00573507	2.06295e-09	3.32008e-15	37	1	207627372	1	205693995	F			NA	TRUE	CR2;CR2	NM_001006658;NM_001877	TSS1500;TSS1500	chr1:207627531-207628280	N_Shore			NA				NA
cg25305703	-0.0276434	0.010256	0.007463	62	455	-0.0548349	0.00773781	1.95007e-12	1840	-0.0454003	0.00829116	5.00286e-08	68	0.00959771	2.24167e-06	-0.045097	0.00519421	-8.68217	3.88288e-18	0.106411	0.00959771	2.24167e-06	3.528e-15	37	8	128378218	8	128447400	F			NA	NA								TRUE				NA
cg18018313	-0.0267643	0.00762561	0.000523536	62	455	-0.0295155	0.00484354	1.33986e-09	1840	-0.0269864	0.00456601	4.11201e-09	68	0.00528554	3.29561e-07	-0.0280739	0.00323393	-8.68105	3.92136e-18	0.922927	0.00528554	3.29561e-07	3.55572e-15	37	2	227657192	2	227365436	F			NA	NA	IRS1	NM_005544	3'UTR	chr2:227655903-227656647	S_Shore			NA				NA
cg11980897	-0.027961	0.00659205	3.03162e-05	62	455	-0.0269942	0.00511853	1.49362e-07	1840	-0.0243367	0.0038518	3.36413e-10	68	0.00445878	4.81126e-08	-0.0259947	0.00299502	-8.67932	3.98142e-18	0.875734	0.00445878	4.81126e-08	3.60286e-15	37	1	32237457	1	32010044	F			NA	NA				chr1:32237827-32238661	N_Shore			TRUE		1:32236958-32238593	Promoter_Associated_Cell_type_specific	NA
cg27630153	-0.0254706	0.00587822	2.06159e-05	62	455	-0.0109786	0.00185704	4.02246e-09	1840	-0.0104984	0.00172747	1.50289e-09	68	0.00199969	1.52098e-07	-0.0115046	0.00132571	-8.67811	4.02415e-18	0.0503308	0.00199969	1.52098e-07	3.63416e-15	37	16	88845038	16	87372539	F			NA	NA	FAM38A	NM_001142864	Body	chr16:88844943-88845205	Island			TRUE	16:87372402-87372706			NA
cg14992524	-0.0310867	0.00828602	0.000214071	62	455	-0.032719	0.00551009	3.44083e-09	1840	-0.0414339	0.00690573	2.40335e-09	68	0.00799396	2.18167e-07	-0.0345021	0.00397935	-8.67028	4.31064e-18	0.598536	0.00799396	2.18167e-07	3.88502e-15	37	8	10586135	8	10623545	R	rs4841434		NA	NA	SOX7	NM_031439	Body	chr8:10586613-10586886	N_Shore			NA				NA
cg11190278	-0.0193848	0.00786635	0.0143389	62	455	-0.0278671	0.0047506	5.28062e-09	1840	-0.0322387	0.00460927	3.80817e-12	68	0.00533561	1.52059e-09	-0.0280395	0.00323429	-8.66945	4.34197e-18	0.400281	0.00533561	1.52059e-09	3.90536e-15	37	14	51252662	14	50322412	R			NA	NA	NIN;NIN;NIN;NIN	NM_182946;NM_016350;NM_020921;NM_182944	Body;Body;Body;Body					TRUE		14:51252371-51252683	Gene_Associated_Cell_type_specific	NA
cg07615364	-0.0197889	0.00506168	0.00011643	62	455	-0.0232114	0.00410182	1.76431e-08	1840	-0.0219204	0.00357087	1.0317e-09	68	0.00413358	1.13907e-07	-0.0218793	0.00252383	-8.66906	4.35702e-18	0.871044	0.00413358	1.13907e-07	3.91102e-15	37	3	52088726	3	52063766	F			NA	NA	DUSP7	NM_001947	Body	chr3:52089652-52090845	N_Shore			NA				NA
cg05201185	-0.0236277	0.00729766	0.00135211	62	455	-0.0371117	0.00462972	1.92315e-15	1840	-0.0163743	0.00469441	0.000498885	68	0.00543417	0.00258508	-0.0274895	0.00317348	-8.66224	4.62568e-18	0.0123796	0.00543417	0.00258508	4.13844e-15	37	6	30459139	6	30567118	F	rs62621992		NA	NA	HLA-E	NM_005516	Body	chr6:30457369-30458175	S_Shore			NA				NA
cg27262041	-0.0167614	0.00923111	0.0704936	62	455	-0.0498835	0.00715973	4.48519e-12	1840	-0.0506594	0.00763932	4.44395e-11	68	0.00884315	1.01227e-08	-0.0412809	0.00476566	-8.66216	4.62893e-18	0.00813286	0.00884315	1.01227e-08	4.13844e-15	37	11	19654032	11	19610608	R			NA	NA	NAV2	NM_001111018	Body					TRUE				NA
cg14293323	-0.0258922	0.00787396	0.00113852	62	455	-0.0378714	0.00536834	2.44166e-12	1840	-0.0248848	0.00513288	1.35913e-06	68	0.00594174	2.81255e-05	-0.0307831	0.00355439	-8.6606	4.69302e-18	0.210697	0.00594174	2.81255e-05	4.18734e-15	37	11	353567	11	343567	F		rs73398586	NA	NA				chr11:355947-356447	N_Shelf		CDMR	NA				TRUE
cg04718050	-0.0137735	0.00478781	0.00433112	62	455	-0.0149962	0.00271706	3.88754e-08	1840	-0.0158989	0.00227567	4.02021e-12	68	0.00263428	1.58557e-09	-0.0152337	0.00175903	-8.66025	4.70711e-18	0.921073	0.00263428	1.58557e-09	4.19153e-15	37	14	69281297	14	68351050	F			NA	NA				chr14:69283046-69283605	N_Shore			TRUE		14:69281182-69281732	Unclassified	TRUE
cg13468041	-0.0217929	0.00716571	0.00258226	62	455	-0.0320512	0.00492645	9.92391e-11	1840	-0.0393876	0.00664416	3.69677e-09	68	0.00769117	3.03691e-07	-0.0310747	0.00359017	-8.65549	4.90812e-18	0.236302	0.00769117	3.03691e-07	4.35493e-15	37	4	74902951	4	75121815	R			NA	NA	CXCL3	NM_002090	3'UTR	chr4:74903953-74904589	N_Shore			NA				NA
cg02361903	-0.011501	0.00588691	0.0517524	62	455	-0.0222149	0.00386097	1.02041e-08	1840	-0.0302341	0.00392037	2.08566e-14	68	0.00453816	2.69753e-11	-0.0227701	0.00263073	-8.65544	4.91012e-18	0.0409619	0.00453816	2.69753e-11	4.35493e-15	37	1	110452616	1	110254139	R			NA	NA	CSF1;CSF1;CSF1;CSF1	NM_172212;NM_000757;NM_172211;NM_172210	TSS1500;TSS1500;TSS1500;TSS1500	chr1:110453143-110453889	N_Shore			NA		1:110452587-110452712	Unclassified_Cell_type_specific	NA
cg16541026	-0.0331765	0.00667975	1.19513e-06	62	455	-0.0282944	0.00535017	1.38031e-07	1840	-0.0230464	0.00407948	1.88252e-08	68	0.00472234	1.05934e-06	-0.0270622	0.00312822	-8.65099	5.10547e-18	0.446182	0.00472234	1.05934e-06	4.5192e-15	37	3	49026934	3	49001938	R			NA	NA	P4HTM;P4HTM	NM_177939;NM_177938	TSS1500;TSS1500	chr3:49027116-49028356	N_Shore			NA		3:49026839-49028774	Promoter_Associated	NA
cg17695841	-0.0232217	0.00726838	0.00156111	62	455	-0.0243164	0.00470352	2.59772e-07	1840	-0.0318991	0.00439344	5.82094e-13	68	0.00508578	3.55958e-10	-0.0269668	0.00311903	-8.64591	5.33797e-18	0.466838	0.00508578	3.55958e-10	4.71565e-15	37	11	45825485	11	45782061	F			NA	NA	SLC35C1;SLC35C1;SLC35C1	NM_001145266;NM_018389;NM_001145265	TSS200;TSS1500;TSS200	chr11:45825615-45826872	N_Shore			NA	11:45782021-45783553			NA
cg04368724	-0.0337507	0.00666469	7.51358e-07	62	455	-0.0317342	0.00515468	9.11456e-10	1840	-0.0202504	0.00457881	1.03642e-05	68	0.00530036	0.000133146	-0.027939	0.0032318	-8.64501	5.38017e-18	0.182073	0.00530036	0.000133146	4.74353e-15	37	6	31760593	6	31868572	F			NA	NA	VARS	NM_006295	Body	chr6:31763240-31763905	N_Shelf			NA				NA
cg00443981	-0.0221798	0.01086	0.0420677	62	455	-0.0389613	0.00477899	6.51295e-16	1840	-0.0181469	0.00424446	2.01267e-05	68	0.00491331	0.000221258	-0.0282395	0.00326706	-8.64371	5.44177e-18	0.0083783	0.00491331	0.000221258	4.78838e-15	37	17	58499679	17	55854461	F			NA	NA	C17orf64	NM_181707	TSS200	chr17:58498711-58499332	S_Shore			TRUE				NA
cg15329642	-0.0235237	0.00675025	0.000572527	62	455	-0.0299536	0.00475556	3.74666e-10	1840	-0.023044	0.00406004	1.61798e-08	68	0.00469984	9.4315e-07	-0.0258802	0.00299562	-8.63934	5.65368e-18	0.543424	0.00469984	9.4315e-07	4.96505e-15	37	1	45308298	1	45080885	R			NA	TRUE	PTCH2;PTCH2	NM_001166292;NM_003738	Body;Body	chr1:45308543-45309159	N_Shore			NA				NA
cg02898721	-0.00914125	0.00600503	0.129087	62	455	-0.0289991	0.00374617	1.61552e-14	1840	-0.019067	0.0035986	1.31925e-07	68	0.00416568	4.71346e-06	-0.0218284	0.00252687	-8.6385	5.69546e-18	0.0137934	0.00416568	4.71346e-06	4.99192e-15	37	17	38473222	17	35726748	F	rs76423779		NA	NA	RARA;RARA;RARA	NM_001145302;NM_000964;NM_001145301	TSS1500;5'UTR;TSS1500	chr17:38474197-38474980	N_Shore			TRUE		17:38472852-38476047	Promoter_Associated	NA
cg16723994	-0.0230726	0.00573915	7.50839e-05	62	455	-0.0282173	0.00424175	3.79388e-11	1840	-0.017942	0.00375649	1.93806e-06	68	0.00434845	3.6903e-05	-0.0231778	0.00268391	-8.63584	5.82964e-18	0.239111	0.00434845	3.6903e-05	5.09951e-15	37	17	56401623	17	53756622	F			NA	NA	BZRAP1;BZRAP1	NM_004758;NM_024418	Body;Body	chr17:56401728-56402343	N_Shore			TRUE				TRUE
cg09291026	-0.00542357	0.00426226	0.20428	62	455	-0.0262165	0.00312652	9.93149e-17	1840	-0.0123231	0.00230448	1.01183e-07	68	0.00266762	3.84632e-06	-0.0158197	0.00183226	-8.63398	5.92552e-18	8.58677e-05	0.00266762	3.84632e-06	5.17324e-15	37	14	81184965	14	80254718	R			NA	NA	C14orf145	NM_152446	Body					TRUE				NA
cg25565476	-0.0154957	0.00720521	0.0323739	62	455	-0.0389191	0.00467305	1.57911e-16	1840	-0.0187926	0.0047176	7.07497e-05	68	0.00546102	0.000579081	-0.0274971	0.00318486	-8.63368	5.941e-18	0.00353649	0.00546102	0.000579081	5.17662e-15	37	7	106270744	7	106057980	R			NA	NA						low-CpG:106057956-106058150		NA				NA
cg16624069	-0.0232428	0.00967543	0.0169552	62	455	-0.0388735	0.00534591	5.22953e-13	1840	-0.0274388	0.00545964	5.53897e-07	68	0.00631999	1.4146e-05	-0.0324634	0.00376064	-8.63242	6.00691e-18	0.225598	0.00631999	1.4146e-05	5.22385e-15	37	13	99630210	13	98428211	R			NA	NA	DOCK9;DOCK9;DOCK9;DOCK9;DOCK9;DOCK9	NM_015296;NM_001130050;NM_001130050;NM_001130049;NM_001130048;NM_001130048	Body;5'UTR;1stExon;Body;5'UTR;1stExon					TRUE		13:99630180-99630217	Unclassified_Cell_type_specific	TRUE
cg04774505	-0.0129633	0.00517857	0.0128837	62	455	-0.0282303	0.00423813	3.57994e-11	1840	-0.022551	0.00361361	5.48324e-10	68	0.00418306	7.00599e-08	-0.0222757	0.00258102	-8.63056	6.10514e-18	0.0738248	0.00418306	7.00599e-08	5.29894e-15	37	14	24549943	14	23619783	F			NA	NA	NRL	NM_006177	3'UTR	chr14:24550317-24551148	N_Shore			NA				TRUE
cg08545213	-0.0169253	0.00420579	7.38628e-05	62	455	-0.0263865	0.00448278	4.68614e-09	1840	-0.0228708	0.00386873	4.07712e-09	68	0.00447838	3.27412e-07	-0.0218387	0.00253058	-8.62993	6.13886e-18	0.294181	0.00447838	3.27412e-07	5.31786e-15	37	3	37959356	3	37934360	F			NA	NA	CTDSPL;CTDSPL	NM_005808;NM_001008392	Body;Body					TRUE				NA
cg00850538	-0.0117319	0.00577197	0.0430538	62	455	-0.0175118	0.00252772	5.8845e-12	1840	-0.0121242	0.00209827	8.95069e-09	68	0.00242893	5.98794e-07	-0.0144595	0.00167594	-8.62772	6.25897e-18	0.271742	0.00242893	5.98794e-07	5.4114e-15	37	2	36582038	2	36435542	F			NA	TRUE	CRIM1	NM_016441	TSS1500	chr2:36582397-36584260	N_Shore			NA				NA
cg24002003	-0.0225211	0.0058406	0.000143497	62	455	-0.0179834	0.0035314	3.89704e-07	1840	-0.0228782	0.00336094	1.37291e-11	68	0.00389057	4.09197e-09	-0.020583	0.00238659	-8.62442	6.44209e-18	0.606511	0.00389057	4.09197e-09	5.55895e-15	37	15	101668143	15	99485666	F			NA	NA								TRUE		15:101667410-101668295	Promoter_Associated	TRUE
cg04051152	-0.0373779	0.00832838	1.05661e-05	62	455	-0.0300248	0.00425712	2.4716e-12	1840	-0.0160015	0.00402535	7.32504e-05	68	0.00465968	0.000594685	-0.0253569	0.00294052	-8.62326	6.50744e-18	0.0257754	0.00465968	0.000594685	5.6045e-15	37	12	12418005	12	12309272	R			NA	NA	LRP6	NM_002336	Body	chr12:12419679-12420541	N_Shore		RDMR	NA				NA
cg14750778	-0.0167084	0.00734633	0.0237106	62	455	-0.0349758	0.0050453	5.70693e-12	1840	-0.0251455	0.00428584	5.3117e-09	68	0.00496122	4.01151e-07	-0.0274803	0.0031872	-8.62209	6.57428e-18	0.101336	0.00496122	4.01151e-07	5.65116e-15	37	17	26899428	17	23923555	R			NA	NA	PIGS	NM_033198	TSS1500	chr17:26898105-26898781	S_Shore			NA				NA
cg03114845	-0.020907	0.00580489	0.000374926	62	455	-0.028612	0.00471593	1.57715e-09	1840	-0.0179348	0.002932	1.17927e-09	68	0.00339403	1.26235e-07	-0.0214548	0.00248875	-8.62071	6.65377e-18	0.183798	0.00339403	1.26235e-07	5.70849e-15	37	12	66270387	12	64556654	R			NA	NA	HMGA2;HMGA2	NM_003484;NM_003483	Body;Body					TRUE				NA
cg03269716	-0.0305635	0.00897202	0.000755853	62	455	-0.039714	0.00591207	2.45719e-11	1840	-0.0302568	0.00602389	5.6232e-07	68	0.00697315	1.43105e-05	-0.0347112	0.00402916	-8.61499	6.99472e-18	0.512262	0.00697315	1.43105e-05	5.98948e-15	37	1	874896	1	864759	F	rs2340591		NA	NA	SAMD11	NM_152486	Body	chr1:875730-878363	N_Shore			NA				NA
cg17284119	-0.02046	0.00618407	0.00106254	62	455	-0.0301878	0.00465802	1.1682e-10	1840	-0.0199727	0.00349869	1.33971e-08	68	0.00405002	8.16005e-07	-0.0236028	0.00273995	-8.61433	7.03534e-18	0.216518	0.00405002	8.16005e-07	6.01272e-15	37	6	110644424	6	110751117	R			NA	NA	C6orf186	NM_001123364	Body					TRUE				NA
cg10798225	-0.0259189	0.00665559	0.000123592	62	455	-0.0255186	0.00493874	2.63665e-07	1840	-0.0250066	0.00380343	6.45234e-11	68	0.00440279	1.34925e-08	-0.0253677	0.00294678	-8.60862	7.39457e-18	0.992766	0.00440279	1.34925e-08	6.30765e-15	37	11	448822	11	438822	R			NA	NA	PTDSS2	NM_030783	TSS1500	chr11:449961-451178	N_Shore			NA		11:447922-448895	Promoter_Associated	NA
cg03126058	-0.0308751	0.0106824	0.00415485	62	455	-0.0378241	0.00550905	9.00915e-12	1840	-0.0345643	0.00687119	5.41039e-07	68	0.00795398	1.38939e-05	-0.0358696	0.00416961	-8.60263	7.79125e-18	0.830525	0.00795398	1.38939e-05	6.63335e-15	37	1	3282757	1	3272617	F	rs77953771		NA	NA	PRDM16;PRDM16	NM_022114;NM_199454	Body;Body					NA	1:3272273-3272934			NA
cg19494100	-0.0166447	0.00522032	0.0015951	62	455	-0.0209892	0.00356432	4.6165e-09	1840	-0.018525	0.0029376	3.63137e-10	68	0.00340051	5.10272e-08	-0.019144	0.00222559	-8.60174	7.85164e-18	0.767069	0.00340051	5.10272e-08	6.66675e-15	37	6	18387313	6	18495292	F			NA	NA	RNF144B	NM_182757	TSS1500	chr6:18387450-18387846	N_Shore			NA		6:18387270-18388088	Promoter_Associated_Cell_type_specific	NA
cg20341535	-0.0203668	0.00633984	0.00147174	62	455	-0.0250897	0.00335332	1.12746e-13	1840	-0.0416647	0.0115061	0.000301877	68	0.0133192	0.00175902	-0.0248881	0.00289343	-8.60161	7.86038e-18	0.350156	0.0133192	0.00175902	6.66675e-15	37	11	118017101	11	117522311	R		rs2946742	NA	NA	SCN4B;SCN4B;SCN4B;SCN4B	NM_001142348;NM_001142349;NR_024527;NM_174934	Body;TSS1500;TSS1500;Body	chr11:118016237-118016984	S_Shore			TRUE		11:118015172-118017490	Unclassified	NA
cg26153045	-0.0184303	0.00673105	0.00658138	62	455	-0.0363574	0.00546573	3.80444e-11	1840	-0.03082	0.00517115	3.05586e-09	68	0.00598604	2.62375e-07	-0.0297643	0.00346162	-8.59835	8.08672e-18	0.115241	0.00598604	2.62375e-07	6.84571e-15	37	7	73441834	7	73079770	F	rs55670340		NA	NA	ELN;ELN;ELN;ELN;ELN	NM_001081752;NM_000501;NM_001081754;NM_001081753;NM_001081755	TSS1500;TSS1500;TSS1500;TSS1500;TSS1500					NA		7:73440546-73441875	Promoter_Associated	NA
cg10529555	-0.0381134	0.00928822	5.36391e-05	62	455	-0.0397876	0.00700908	1.59346e-08	1840	-0.0393427	0.0068192	9.42151e-09	68	0.0078938	6.22824e-07	-0.0392345	0.00456459	-8.59539	8.29801e-18	0.989564	0.0078938	6.22824e-07	7.01127e-15	37	1	205254523	1	203521146	R			NA	NA								TRUE				NA
cg11042320	-0.00705041	0.00623695	0.259278	62	455	-0.0291703	0.00393608	1.90094e-13	1840	-0.0221316	0.00370282	2.75976e-09	68	0.00428632	2.42618e-07	-0.0225921	0.00262901	-8.59341	8.44289e-18	0.0110311	0.00428632	2.42618e-07	7.1202e-15	37	5	149534497	5	149514690	F			NA	TRUE	PDGFRB	NM_002609	5'UTR					TRUE		5:149533603-149535045	Unclassified_Cell_type_specific	NA
cg07057831	-0.0244479	0.00769691	0.00166074	62	455	-0.033403	0.00504939	4.84816e-11	1840	-0.022962	0.00419253	4.97114e-08	68	0.00485321	2.23077e-06	-0.0273715	0.00318534	-8.59298	8.47422e-18	0.301706	0.00485321	2.23077e-06	7.13314e-15	37	12	131323042	12	129888995	R		rs79486590	NA	TRUE	STX2;STX2	NM_001980;NM_194356	Body;Body	chr12:131323203-131323959	N_Shore			NA	12:129888902-129889912	12:131322496-131325034	Promoter_Associated	NA
cg20010135	-0.0289216	0.0097011	0.00312659	62	455	-0.0409973	0.00664188	8.24599e-10	1840	-0.0394494	0.00644729	1.1662e-09	68	0.00746327	1.25159e-07	-0.0379512	0.00441738	-8.59134	8.59644e-18	0.572072	0.00746327	1.25159e-07	7.22239e-15	37	16	30996822	16	30904323	F	rs12443808		NA	NA	HSD3B7;HSD3B7;HSD3B7	NM_025193;NM_001142778;NM_001142777	5'UTR;5'UTR;5'UTR					TRUE		16:30995842-30996942	Gene_Associated	NA
cg12729894	-0.0175964	0.00488606	0.000375298	62	455	-0.0241424	0.00382308	3.3807e-10	1840	-0.0172535	0.00311336	3.46106e-08	68	0.00360398	1.68999e-06	-0.0198467	0.00231066	-8.58918	8.75914e-18	0.369285	0.00360398	1.68999e-06	7.34494e-15	37	11	1774378	11	1730954	R			NA	NA	HCCA2;CTSD	NM_053005;NM_001909	Body;3'UTR	chr11:1774588-1775040	N_Shore			NA		11:1774301-1774762	Unclassified_Cell_type_specific	NA
cg25484139	-0.0255163	0.00859788	0.003263	62	455	-0.0410672	0.00580368	2.1001e-12	1840	-0.034769	0.00725043	1.7637e-06	68	0.00839298	3.43339e-05	-0.0358458	0.00417347	-8.58897	8.77524e-18	0.321547	0.00839298	3.43339e-05	7.34494e-15	37	3	13008273	3	12983273	F			NA	NA	IQSEC1;IQSEC1	NM_001134382;NM_014869	Body;Body	chr3:13008648-13009210	N_Shore		RDMR	NA		3:13008122-13010089	Promoter_Associated	NA
cg07233933	-0.0296744	0.00775349	0.00016036	62	455	-0.0304991	0.00551072	3.56942e-08	1840	-0.0378064	0.00603129	4.60599e-10	68	0.00698172	6.12679e-08	-0.0324425	0.00377752	-8.58832	8.82511e-18	0.656362	0.00698172	6.12679e-08	7.37285e-15	37	5	173352671	5	173285277	F			NA	NA	CPEB4	NM_030627	Body					TRUE		5:173352531-173352896	Unclassified_Cell_type_specific	NA
cg17207266	-0.00844485	0.00431818	0.0515154	62	455	-0.0170065	0.00238377	1.3933e-12	1840	-0.0149507	0.00275149	6.31348e-08	68	0.00318508	2.67942e-06	-0.01499	0.00174558	-8.58737	8.89828e-18	0.221669	0.00318508	2.67942e-06	7.42008e-15	37	2	25562957	2	25416461	R			NA	NA	DNMT3A;DNMT3A;DNMT3A	NM_022552;NM_175630;NM_175629	5'UTR;5'UTR;5'UTR	chr2:25563309-25563661	N_Shore			TRUE	2:25416436-25419085			NA
cg26705561	-0.024178	0.0101233	0.0175968	62	455	-0.0360662	0.00545073	4.79978e-11	1840	-0.0357173	0.00612618	6.59928e-09	68	0.00709157	4.7389e-07	-0.034124	0.00397462	-8.58548	9.04613e-18	0.564754	0.00709157	4.7389e-07	7.5293e-15	37	10	102279791	10	102269781	F			NA	TRUE	SEC31B	NM_015490	TSS200	chr10:102279162-102279730	S_Shore			TRUE				NA
cg06437922	-0.0175214	0.00604939	0.00407707	62	455	-0.0249958	0.00446037	2.4116e-08	1840	-0.0229902	0.00336154	1.10449e-11	68	0.00389127	3.45965e-09	-0.0226516	0.00263861	-8.5847	9.10773e-18	0.605622	0.00389127	3.45965e-09	7.56646e-15	37	1	226308360	1	224374983	F		rs77753462	NA	NA				chr1:226308959-226310476	N_Shore			NA		1:226308309-226308444	Unclassified_Cell_type_specific	NA
cg12984877	-0.0292078	0.00810551	0.0003724	62	455	-0.0293519	0.00524889	2.58102e-08	1840	-0.0350042	0.00552484	3.01077e-10	68	0.00639546	4.41749e-08	-0.0311422	0.00362819	-8.58338	9.2122e-18	0.764161	0.00639546	4.41749e-08	7.63902e-15	37	4	146856745	4	147076195	R			NA	NA	ZNF827	NM_178835	Body	chr4:146857334-146859082	N_Shore			NA				NA
cg07052063	-0.0353196	0.00697023	7.40253e-07	62	455	-0.0331964	0.00606333	4.97795e-08	1840	-0.0289141	0.00581311	7.21794e-07	68	0.00672917	1.73252e-05	-0.0324683	0.00378323	-8.58217	9.31001e-18	0.794245	0.00672917	1.73252e-05	7.7058e-15	37	10	99255236	10	99245226	R			NA	NA	MMS19	NM_022362	Body	chr10:99257940-99259520	N_Shelf			NA		10:99254743-99255270	Promoter_Associated_Cell_type_specific	NA
cg25580656	-0.0172356	0.00607826	0.00491221	62	455	-0.025993	0.00348036	1.24616e-13	1840	-0.0156714	0.00363641	1.72868e-05	68	0.00420945	0.000196947	-0.0210577	0.00245397	-8.5811	9.39734e-18	0.13242	0.00420945	0.000196947	7.76368e-15	37	14	104197160	14	103266913	R			NA	NA	ZFYVE21	NM_024071	Body	chr14:104193901-104194627	S_Shelf			NA		14:104196979-104197300	Unclassified_Cell_type_specific	TRUE
cg05454635	-0.0119622	0.00509182	0.019514	62	455	-0.024558	0.00379051	1.18333e-10	1840	-0.0202924	0.00319835	2.84647e-10	68	0.00370236	4.2308e-08	-0.0201576	0.00234971	-8.57878	9.58841e-18	0.139484	0.00370236	4.2308e-08	7.90689e-15	37	15	74657911	15	72444964	R			NA	NA	CYP11A1;CYP11A1	NM_000781;NM_001099773	Body;5'UTR	chr15:74658038-74658574	N_Shore			TRUE				TRUE
cg20495009	-0.0202843	0.00511831	9.42785e-05	62	455	-0.0289695	0.004585	3.30867e-10	1840	-0.0218641	0.00424057	2.81616e-07	68	0.00490881	8.42647e-06	-0.0240465	0.00280341	-8.57758	9.68907e-18	0.388525	0.00490881	8.42647e-06	7.97516e-15	37	12	105323744	12	103847874	F			NA	NA	SLC41A2	NM_032148	TSS1500					NA				NA
cg05611648	-0.0125256	0.00560097	0.0261291	62	455	-0.0286562	0.00381255	8.74978e-14	1840	-0.0259527	0.00531133	1.12348e-06	68	0.00614831	2.43106e-05	-0.024049	0.00280466	-8.57464	9.93965e-18	0.0553254	0.00614831	2.43106e-05	8.16635e-15	37	2	239050834	2	238715573	R		rs78107972	NA	NA	KLHL30	NM_198582	Body	chr2:239049388-239050089	S_Shore			NA				TRUE
cg08420066	-0.0170165	0.0042141	6.9905e-05	62	455	-0.0186623	0.00301156	7.09029e-10	1840	-0.0139466	0.00269382	2.5173e-07	68	0.00311832	7.73257e-06	-0.0165182	0.00192661	-8.57371	1.00202e-17	0.548549	0.00311832	7.73257e-06	8.2174e-15	37	6	30647561	6	30755540	F			NA	NA	KIAA1949;KIAA1949	NM_001134870;NM_133471	Body;Body					TRUE				NA
cg06829788	-0.0411126	0.0102809	8.17514e-05	62	455	-0.0308928	0.00612612	5.03881e-07	1840	-0.032995	0.00497661	4.48467e-11	68	0.00576084	1.01941e-08	-0.0333088	0.00388547	-8.57266	1.01118e-17	0.69258	0.00576084	1.01941e-08	8.27727e-15	37	1	228581405	1	226648028	F	rs74144619		NA	NA	TRIM11	NM_145214	3'UTR	chr1:228582428-228582894	N_Shore			TRUE		1:228581024-228581673	Unclassified_Cell_type_specific	TRUE
cg12432038	-0.0154318	0.0080231	0.0554563	62	455	-0.034618	0.00536887	1.44508e-10	1840	-0.0344816	0.00520501	4.64537e-11	68	0.00602524	1.04745e-08	-0.0307372	0.00358579	-8.57195	1.01744e-17	0.102904	0.00602524	1.04745e-08	8.31327e-15	37	1	247275735	1	245342358	R			NA	NA	C1orf229	NM_207401	TSS200	chr1:247274585-247275757	Island			TRUE	1:245341222-245342380	1:247273921-247275897	Unclassified_Cell_type_specific	TRUE
cg00079056	-0.00946122	0.00331161	0.00460226	62	455	-0.0158287	0.00217254	4.7226e-13	1840	-0.0101253	0.00217493	3.48122e-06	68	0.00251766	5.77758e-05	-0.0126161	0.00147312	-8.56424	1.08795e-17	0.13049	0.00251766	5.77758e-05	8.87319e-15	37	9	33239641	9	33229641	R			NA	TRUE	SUGT1P1;SPINK4	NR_003667;NM_014471	Body;TSS1500					NA				NA
cg09770579	-0.012654	0.00472807	0.00788814	62	455	-0.0203028	0.0039282	2.61652e-07	1840	-0.0228938	0.00303308	7.13837e-14	68	0.00351104	7.00654e-11	-0.0196106	0.00229019	-8.56287	1.1009e-17	0.21542	0.00351104	7.00654e-11	8.9624e-15	37	16	17407429	16	17314930	R			NA	NA	XYLT1	NM_022166	Body					TRUE				NA
cg12082089	-0.0184415	0.00625675	0.00347781	62	455	-0.0289082	0.00446534	1.22171e-10	1840	-0.0271576	0.00473272	1.12885e-08	68	0.00547852	7.15519e-07	-0.0259206	0.00302871	-8.55829	1.14559e-17	0.381455	0.00547852	7.15519e-07	9.3092e-15	37	8	22839080	8	22895025	R			NA	NA								TRUE				NA
cg00016968	-0.0153845	0.00417904	0.000279016	62	455	-0.0149836	0.00294386	3.95083e-07	1840	-0.0172838	0.00255739	1.9067e-11	68	0.00296039	5.27186e-09	-0.0159789	0.00186744	-8.55662	1.16225e-17	0.84839	0.00296039	5.27186e-09	9.42739e-15	37	1	113250448	1	113051971	R			NA	TRUE	RHOC;RHOC;RHOC	NM_001042679;NM_175744;NM_001042678	TSS1500;TSS1500;TSS1500	chr1:113249342-113250198	S_Shore			NA				NA
cg09321403	-0.0349457	0.00913336	0.000161021	62	455	-0.038691	0.00579691	3.27528e-11	1840	-0.0281912	0.00622316	6.3047e-06	68	0.00720383	9.10202e-05	-0.0346391	0.00404836	-8.55633	1.16518e-17	0.524446	0.00720383	9.10202e-05	9.43402e-15	37	6	13555624	6	13663603	F	rs73356472		NA	NA								TRUE				NA
cg06143901	-0.028187	0.00868693	0.00132027	62	455	-0.0337865	0.00608214	3.18047e-08	1840	-0.0394988	0.0059502	4.24769e-11	68	0.00688785	9.77637e-09	-0.0345394	0.00403691	-8.55591	1.16945e-17	0.586107	0.00688785	9.77637e-09	9.45148e-15	37	20	591400	20	539400	F		rs41379048	NA	TRUE	TCF15	NM_004609	TSS1500	chr20:590222-591222	S_Shore			NA	20:538223-539476			TRUE
cg12570134	-0.0152636	0.00484792	0.0018212	62	455	-0.0256852	0.0044812	1.15901e-08	1840	-0.0197309	0.00297015	4.11489e-11	68	0.0034382	9.53994e-09	-0.0203324	0.00237731	-8.55268	1.20265e-17	0.279346	0.0034382	9.53994e-09	9.70223e-15	37	17	46640347	17	43995346	F	rs76034280		NA	NA	HOXB3	NM_002146	5'UTR	chr17:46641534-46642110	N_Shore		CDMR	NA		17:46639123-46640826	Unclassified	NA
cg23722790	-0.0187724	0.00514414	0.000314424	62	455	-0.0273376	0.00385109	1.79166e-12	1840	-0.015757	0.00365768	1.74151e-05	68	0.00423407	0.000198065	-0.0213148	0.00249225	-8.55245	1.20506e-17	0.110078	0.00423407	0.000198065	9.70411e-15	37	1	67467602	1	67240190	R			NA	NA	SLC35D1	NM_015139	3'UTR					TRUE				NA
cg16639915	-0.0158043	0.00445745	0.000460011	62	455	-0.028638	0.00382516	1.089e-13	1840	-0.0142755	0.00348664	4.43069e-05	68	0.00403607	0.00040473	-0.0201542	0.00235662	-8.55218	1.20783e-17	0.0183815	0.00403607	0.00040473	9.7089e-15	37	15	64960011	15	62747064	F			NA	NA	ZNF609	NM_015042	Body					TRUE				NA
cg17516571	-0.0209081	0.00624476	0.000926806	62	455	-0.0296579	0.00506459	5.60496e-09	1840	-0.0284213	0.00456481	5.99852e-10	68	0.00528415	7.50704e-08	-0.0269832	0.0031553	-8.55171	1.21276e-17	0.522212	0.00528415	7.50704e-08	9.73101e-15	37	8	49584227	8	49746780	F			NA	NA								TRUE				NA
cg03970899	-0.00938089	0.00541874	0.0845347	62	455	-0.0210903	0.00295718	1.41698e-12	1840	-0.027061	0.00468288	8.92408e-09	68	0.00542083	5.97427e-07	-0.0200182	0.00234121	-8.55036	1.22708e-17	0.05863	0.00542083	5.97427e-07	9.82821e-15	37	22	19710091	22	18090091	F	rs73377942		NA	NA	GP1BB;SEPT5	NM_000407;NM_002688	TSS1500;3'UTR	chr22:19709081-19712106	Island			NA	22:18089168-18092190	22:19709912-19710093	Unclassified_Cell_type_specific	NA
cg06852240	-0.029238	0.00799947	0.000307812	62	455	-0.0265118	0.00461809	1.09955e-08	1840	-0.02634	0.00438802	2.36338e-09	68	0.0050795	2.15374e-07	-0.0268667	0.00314232	-8.54996	1.23135e-17	0.949076	0.0050795	2.15374e-07	9.84472e-15	37	16	85520182	16	84077683	R		rs76580397	NA	NA				chr16:85519109-85519357	S_Shore			NA	16:84077447-84077949			NA
cg27589594	-0.0271918	0.00658902	4.87477e-05	62	455	-0.0319346	0.00458574	4.58986e-12	1840	-0.0162363	0.00375467	1.6183e-05	68	0.00434635	0.000187249	-0.0243227	0.00284529	-8.5484	1.24809e-17	0.0406327	0.00434635	0.000187249	9.96068e-15	37	17	18871182	17	18811907	R			NA	NA	SLC5A10;SLC5A10	NM_001042450;NM_152351	Body;Body	chr17:18874684-18874887	N_Shelf			TRUE		17:18870953-18871380	Unclassified_Cell_type_specific	TRUE
cg21829328	-0.0237123	0.00655076	0.000350686	62	455	-0.0326554	0.00521692	4.79311e-10	1840	-0.0257098	0.0047171	5.75848e-08	68	0.00546043	2.49693e-06	-0.0279394	0.00326887	-8.5471	1.2622e-17	0.496508	0.00546043	2.49693e-06	1.00554e-14	37	22	24188134	22	22518134	R			NA	NA				chr22:24191547-24191985	N_Shelf			TRUE		22:24188026-24188189	Unclassified_Cell_type_specific	NA
cg09423312	-0.0422134	0.0112491	0.000213348	62	455	-0.0582674	0.00746117	9.5741e-15	1840	-0.02279	0.00648802	0.000455208	68	0.00751043	0.00240975	-0.0409296	0.00478945	-8.54579	1.2766e-17	0.00361339	0.00751043	0.00240975	1.01519e-14	37	7	1163549	7	1130075	F			NA	NA	C7orf50;C7orf50;C7orf50	NM_001134395;NM_032350;NM_001134396	Body;Body;Body					TRUE	7:1129982-1130209	7:1163254-1164103	Unclassified_Cell_type_specific	TRUE
cg23781334	-0.0175353	0.00686009	0.0111204	62	455	-0.0129315	0.00204913	3.47066e-10	1840	-0.021893	0.00340351	1.62452e-10	68	0.00393985	2.7475e-08	-0.0150164	0.00175729	-8.54524	1.2827e-17	0.121457	0.00393985	2.7475e-08	1.01823e-14	37	4	1772062	4	1741860	R			NA	NA				chr4:1772006-1772265	Island			NA	4:1741807-1742048			NA
cg03735592	-0.0298448	0.00692528	2.27782e-05	62	455	-0.0320835	0.00495398	1.20282e-10	1840	-0.0208768	0.00466341	8.07946e-06	68	0.00539829	0.000110045	-0.0275873	0.00322895	-8.54375	1.2994e-17	0.290079	0.00539829	0.000110045	1.02927e-14	37	6	138821354	6	138863047	R			NA	NA	NHSL1;NHSL1	NM_001144060;NM_020464	TSS1500;Body					TRUE				NA
cg17607231	0.0505599	0.0089468	3.9679e-08	62	455	0.0290582	0.00601473	1.46981e-06	1840	0.0285534	0.00519516	4.4662e-08	68	0.00601383	2.05489e-06	0.0328151	0.0038409	8.54358	1.30122e-17	0.0895426	0.00601383	2.05489e-06	1.02927e-14	37	2	231090329	2	230798573	R			NA	TRUE	SP140;SP140	NM_001005176;NM_007237	TSS200;TSS200					NA		2:231090068-231091293	Promoter_Associated	NA
cg07285481	-0.0322474	0.00594412	1.26735e-07	62	455	-0.0237515	0.00432346	4.48601e-08	1840	-0.0159765	0.00314981	4.35869e-07	68	0.00364617	1.17743e-05	-0.0215583	0.00252362	-8.54263	1.31205e-17	0.0540793	0.00364617	1.17743e-05	1.036e-14	37	16	81667167	16	80224668	F	rs34981866		NA	NA	CMIP;CMIP	NM_030629;NM_198390	Body;Body					TRUE		16:81666329-81667241	Promoter_Associated	NA
cg03143849	-0.0224737	0.00693079	0.00132996	62	455	-0.0308813	0.00494979	5.45401e-10	1840	-0.0338862	0.00585479	8.46447e-09	68	0.0067774	5.73666e-07	-0.0295671	0.00346263	-8.53892	1.3548e-17	0.466713	0.0067774	5.73666e-07	1.06682e-14	37	11	2904951	11	2861527	R			NA	TRUE	CDKN1C;CDKN1C;CDKN1C	NM_001122630;NM_000076;NM_001122631	3'UTR;3'UTR;3'UTR	chr11:2905023-2907024	N_Shore			NA				NA
cg04039799	-0.0124093	0.00528011	0.0194678	62	455	-0.0237217	0.00344309	7.65211e-12	1840	-0.018226	0.00325897	2.59958e-08	68	0.00377253	1.35691e-06	-0.0195644	0.00229122	-8.53883	1.35587e-17	0.180856	0.00377253	1.35691e-06	1.06682e-14	37	11	19745484	11	19702060	R			NA	NA	NAV2;NAV2;NAV2	NM_182964;NM_001111018;NM_145117	Body;Body;Body				DMR	NA		11:19745373-19745769	Unclassified_Cell_type_specific	NA
cg05632420	-0.0343439	0.00857338	7.95161e-05	62	455	-0.0341322	0.0063478	8.53965e-08	1840	-0.0432349	0.00695606	6.41379e-10	68	0.00805222	7.90361e-08	-0.036793	0.0043095	-8.53765	1.36979e-17	0.638477	0.00805222	7.90361e-08	1.07587e-14	37	7	130793732	7	130444272	R			NA	NA	MKLN1;FLJ43663	NM_001145354;NR_015431	TSS1500;TSS200	chr7:130794689-130795032	N_Shore			NA				NA
cg06376426	-0.0323379	0.00629499	5.28247e-07	62	455	-0.0191028	0.00445588	1.90391e-05	1840	-0.0227069	0.00352036	1.4497e-10	68	0.00407511	2.51691e-08	-0.0231598	0.00271344	-8.53522	1.39884e-17	0.226831	0.00407511	2.51691e-08	1.09676e-14	37	1	24648203	1	24520790	R			NA	NA	GRHL3;GRHL3;GRHL3	NM_198174;NM_198173;NM_021180	TSS1500;Body;TSS1500	chr1:24648202-24648985	Island			NA		1:24647785-24649616	Unclassified	TRUE
cg13633560	-0.0193003	0.00896605	0.0322168	62	455	-0.0355065	0.00563003	3.56244e-10	1840	-0.0342156	0.0053144	1.56487e-10	68	0.00615186	2.6695e-08	-0.032159	0.00376859	-8.53341	1.42091e-17	0.28336	0.00615186	2.6695e-08	1.11211e-14	37	11	76380921	11	76058569	F			NA	TRUE	LRRC32;LRRC32;LRRC32	NM_001128922;NM_005512;NM_005512	5'UTR;1stExon;5'UTR	chr11:76381449-76382295	N_Shore			NA				TRUE
cg12968224	-0.0182888	0.0071028	0.010549	62	455	-0.0329743	0.00506045	9.28963e-11	1840	-0.0237357	0.00394359	2.14456e-09	68	0.00456504	1.99883e-07	-0.0261015	0.00305913	-8.53233	1.43435e-17	0.18985	0.00456504	1.99883e-07	1.12066e-14	37	3	127899140	3	129381830	R			NA	NA	EEFSEC	NM_021937	Body					TRUE				NA
cg27178677	-0.0259966	0.00751815	0.000630444	62	455	-0.0359558	0.00533211	2.06663e-11	1840	-0.0257252	0.00533333	1.53583e-06	68	0.00617378	3.0884e-05	-0.030335	0.00355558	-8.53166	1.44268e-17	0.367562	0.00617378	3.0884e-05	1.1252e-14	37	20	8834803	20	8782803	R			NA	NA	PLCB1;PLCB1	NM_015192;NM_182734	Body;3'UTR					TRUE		20:8834449-8834819	Unclassified_Cell_type_specific	TRUE
cg08726667	-0.0126843	0.00638786	0.0480567	62	455	-0.0326576	0.00447383	4.27151e-13	1840	-0.0238751	0.00437426	5.51679e-08	68	0.00506357	2.41619e-06	-0.0253252	0.00296864	-8.53089	1.4522e-17	0.0353631	0.00506357	2.41619e-06	1.13065e-14	37	16	28573379	16	28480880	R			NA	NA	CCDC101	NM_138414	5'UTR					TRUE				NA
cg05496768	-0.0143027	0.00428737	0.000966493	62	455	-0.0190621	0.00273766	4.62052e-12	1840	-0.0145467	0.00330021	1.10905e-05	68	0.00382027	0.000140229	-0.0168451	0.00197508	-8.52883	1.47836e-17	0.50423	0.00382027	0.000140229	1.14901e-14	37	10	77872288	10	77542294	F	rs75495083		NA	NA	C10orf11	NM_032024	Body	chr10:77872083-77872305	Island			TRUE				NA
cg18990050	-0.0338073	0.00873253	0.000135133	62	455	-0.0328958	0.00429933	3.18664e-14	1840	-0.0138648	0.00378134	0.000253259	68	0.00437722	0.00153759	-0.0246775	0.00289393	-8.52733	1.4976e-17	0.00440744	0.00437722	0.00153759	1.16194e-14	37	7	1163642	7	1130168	F			NA	NA	C7orf50;C7orf50;C7orf50	NM_001134395;NM_032350;NM_001134396	Body;Body;Body					TRUE	7:1129982-1130209	7:1163254-1164103	Unclassified_Cell_type_specific	TRUE
cg07262457	-0.0114896	0.00511976	0.0256142	62	455	-0.025935	0.00396401	7.81351e-11	1840	-0.0199895	0.00316198	3.2888e-10	68	0.00366026	4.72815e-08	-0.0202961	0.00238074	-8.52513	1.52635e-17	0.0825248	0.00366026	4.72815e-08	1.18219e-14	37	3	128777371	3	130260061	R			NA	NA								TRUE				NA
cg04755674	-0.0250697	0.00671557	0.000229718	62	455	-0.0415397	0.00746836	3.05648e-08	1840	-0.0418047	0.0064313	1.04915e-10	68	0.00744477	1.9621e-08	-0.0353411	0.0041471	-8.52188	1.56987e-17	0.150922	0.00744477	1.9621e-08	1.21379e-14	37	19	14142047	19	14003047	F	rs75361438		NA	NA	IL27RA	NM_004843	TSS1500	chr19:14142398-14142977	N_Shore			NA		19:14141765-14143437	Promoter_Associated	NA
cg13544075	-0.0445504	0.0104476	2.75797e-05	62	455	-0.0419246	0.00678206	7.79183e-10	1840	-0.0359714	0.007612	2.48167e-06	68	0.00881153	4.45911e-05	-0.0407228	0.00477917	-8.52088	1.58345e-17	0.795968	0.00881153	4.45911e-05	1.22217e-14	37	9	139644102	9	138763923	R			NA	NA	LCN6	NM_198946	TSS1500	chr9:139640640-139640885	S_Shelf			NA				NA
cg14436426	-0.0206165	0.00615418	0.000920782	62	455	-0.0315401	0.00456016	6.36726e-12	1840	-0.0201955	0.0042258	1.91132e-06	68	0.00489171	3.65127e-05	-0.0249826	0.00293254	-8.51912	1.60776e-17	0.171283	0.00489171	3.65127e-05	1.23681e-14	37	20	62712394	20	62182838	R			NA	TRUE	OPRL1;RGS19;OPRL1	NM_000913;NM_001039467;NM_182647	5'UTR;TSS1500;5'UTR	chr20:62710769-62711745	S_Shore			NA				NA
cg24222546	-0.0131765	0.00877671	0.134421	62	455	-0.0420591	0.0057948	5.76463e-13	1840	-0.0323418	0.00556613	7.4124e-09	68	0.00644326	5.18102e-07	-0.0329488	0.0038677	-8.51898	1.60961e-17	0.0228719	0.00644326	5.18102e-07	1.23681e-14	37	15	74501771	15	72288824	F			NA	NA	STRA6;STRA6;STRA6	NM_001142620;NM_001142617;NM_001142619	TSS1500;TSS1500;TSS1500					TRUE				TRUE
cg04751761	-0.0111928	0.00641056	0.0819261	62	455	-0.0331425	0.0044492	1.43735e-13	1840	-0.0209145	0.0037886	3.90148e-08	68	0.00438562	1.85256e-06	-0.0239194	0.00280781	-8.5189	1.61074e-17	0.0128554	0.00438562	1.85256e-06	1.23681e-14	37	16	2084192	16	2024193	R			NA	NA	SLC9A3R2;SLC9A3R2	NM_001130012;NM_004785	Body;Body	chr16:2086420-2086892	N_Shelf		CDMR	TRUE				TRUE
cg02294302	-0.0139725	0.00578958	0.0164569	62	455	-0.0247173	0.00349207	2.06982e-12	1840	-0.0159599	0.00302433	1.47898e-07	68	0.00350091	5.14483e-06	-0.0193661	0.00227374	-8.51729	1.6333e-17	0.124759	0.00350091	5.14483e-06	1.25199e-14	37	1	47906276	1	47678863	F			NA	NA	FOXD2;FOXD2	NM_004474;NM_004474	3'UTR;1stExon	chr1:47902793-47905518	S_Shore		RDMR	NA				NA
cg26130090	-0.0275111	0.00614977	1.1257e-05	62	455	-0.024838	0.00433115	1.13932e-08	1840	-0.0210072	0.00402445	2.00836e-07	68	0.00465864	6.50398e-06	-0.0239969	0.00281913	-8.51217	1.70702e-17	0.678386	0.00465864	6.50398e-06	1.30625e-14	37	12	54615724	12	52901991	F			NA	NA				chr12:54611595-54612038	S_Shelf			TRUE				NA
cg21450829	-0.00796858	0.00430557	0.0652727	62	455	-0.0203791	0.00276032	2.335e-13	1840	-0.0128414	0.00239555	9.4251e-08	68	0.00277305	3.6427e-06	-0.0151458	0.00178109	-8.50369	1.83665e-17	0.0292506	0.00277305	3.6427e-06	1.40304e-14	37	3	182970719	3	184453413	R			NA	NA	MCF2L2;B3GNT5	NM_015078;NM_032047	Body;TSS1500	chr3:182971429-182972635	N_Shore			NA		3:182970645-182972632	Unclassified_Cell_type_specific	NA
cg13853141	-0.0125014	0.00452814	0.00615199	62	455	-0.0207219	0.00323399	1.87365e-10	1840	-0.0159786	0.00270674	4.28764e-09	68	0.00313328	3.40318e-07	-0.0171317	0.00201519	-8.50126	1.87543e-17	0.299169	0.00313328	3.40318e-07	1.43022e-14	37	2	98329942	2	97696374	F			NA	NA	ZAP70	NM_001079	TSS200					NA		2:98329743-98330828	Promoter_Associated_Cell_type_specific	NA
cg04911680	-0.00828741	0.00599612	0.16805	62	455	-0.0193637	0.00359526	8.13377e-08	1840	-0.0243015	0.00307368	4.70932e-15	68	0.00355804	8.49032e-12	-0.0198088	0.00233019	-8.50093	1.88085e-17	0.0705895	0.00355804	8.49032e-12	1.4319e-14	37	1	27895490	1	27768077	R			NA	NA	AHDC1	NM_001029882	5'UTR	chr1:27894927-27895524	Island			NA		1:27894710-27895814	Promoter_Associated	NA
cg07470570	-0.0230403	0.0077335	0.00314633	62	455	-0.0379942	0.00602535	3.58291e-10	1840	-0.0400357	0.00670096	2.79896e-09	68	0.00775692	2.4526e-07	-0.0344447	0.00405272	-8.49917	1.90956e-17	0.218579	0.00775692	2.4526e-07	1.45128e-14	37	7	70163455	7	69801391	R			NA	NA	AUTS2;AUTS2	NM_015570;NM_001127231	Body;Body	chr7:70158760-70160687	S_Shelf			NA		7:70163207-70163608	Unclassified_Cell_type_specific	TRUE
cg04625615	-0.0211831	0.00737784	0.0044063	62	455	-0.0309879	0.00490905	3.43442e-10	1840	-0.0264337	0.0045347	6.64141e-09	68	0.0052493	4.7621e-07	-0.0273959	0.00322483	-8.49529	1.9744e-17	0.527788	0.0052493	4.7621e-07	1.49801e-14	37	15	41788368	15	39575660	R			NA	NA	ITPKA	NM_002220	Body	chr15:41785616-41788539	Island			NA	15:39572593-39575779			NA
cg23574443	-0.0152066	0.0041744	0.000322055	62	455	-0.0182406	0.00338147	7.76961e-08	1840	-0.0149405	0.00234003	2.20519e-10	68	0.00270879	3.47619e-08	-0.0160214	0.00188603	-8.49482	1.98244e-17	0.730512	0.00270879	3.47619e-08	1.50156e-14	37	17	8263941	17	8204666	R			NA	NA	LOC100128288	NR_024447	TSS200					TRUE				NA
cg07027457	-0.0145109	0.0065388	0.0272861	62	455	-0.0250912	0.00380026	5.27402e-11	1840	-0.02026	0.00344795	5.04137e-09	68	0.00399129	3.85381e-07	-0.0215473	0.0025367	-8.49425	1.99215e-17	0.344445	0.00399129	3.85381e-07	1.50494e-14	37	16	89025522	16	87553023	F			NA	NA	CBFA2T3	NM_005187	Body					NA	16:87552989-87553059			NA
cg13348944	-0.0177779	0.00782514	0.0238622	62	455	-0.0389943	0.00516646	6.93355e-14	1840	-0.0214755	0.00438369	1.05431e-06	68	0.00507449	2.31562e-05	-0.0279091	0.00328568	-8.49416	1.99366e-17	0.0193776	0.00507449	2.31562e-05	1.50494e-14	37	11	118047121	11	117552331	F			NA	TRUE	SCN2B	NM_004588	1stExon					NA				NA
cg04942251	-0.0420926	0.00906383	5.29249e-06	62	455	-0.0286643	0.00689849	3.39966e-05	1840	-0.0494939	0.00700073	2.25016e-12	68	0.00810393	1.01268e-09	-0.038592	0.00454487	-8.49133	2.0429e-17	0.133325	0.00810393	1.01268e-09	1.53951e-14	37	11	63687247	11	63443823	F	rs78100947		NA	NA				chr11:63685489-63685968	S_Shore			NA	11:63443730-63443865			NA
cg04192168	-0.0155669	0.00534894	0.00390543	62	455	-0.0313926	0.00517534	1.58978e-09	1840	-0.0235704	0.00363949	1.22493e-10	68	0.00421302	2.2107e-08	-0.0236661	0.00278827	-8.48773	2.10705e-17	0.10424	0.00421302	2.2107e-08	1.58517e-14	37	15	64806741	15	62593794	R			NA	NA	ZNF609	NM_015042	Body					TRUE		15:64806601-64806812	Unclassified_Cell_type_specific	NA
cg14944269	-0.0322117	0.0089074	0.000355229	62	455	-0.0305287	0.00580162	1.59068e-07	1840	-0.0358283	0.00550751	1.01459e-10	68	0.0063754	1.91214e-08	-0.0327942	0.00386575	-8.48326	2.18976e-17	0.825615	0.0063754	1.91214e-08	1.64462e-14	37	14	65439602	14	64509355	F		rs80343076	NA	TRUE	RAB15	NM_198686	TSS1500	chr14:65438412-65439363	S_Shore			NA				TRUE
cg01102073	-0.033774	0.00876645	0.000145353	62	455	-0.0323708	0.00560752	9.13367e-09	1840	-0.0309936	0.00548164	1.83227e-08	68	0.00634545	1.03758e-06	-0.0321419	0.00378913	-8.48266	2.20108e-17	0.96605	0.00634545	1.03758e-06	1.65035e-14	37	3	128204813	3	129687503	R			NA	NA	GATA2;GATA2;GATA2	NM_001145661;NM_032638;NM_001145662	Body;Body;Body	chr3:128205495-128212274	N_Shore		RDMR	TRUE	3:129687477-129687618			NA
cg15297650	-0.0216957	0.00610206	0.000443804	62	455	-0.0229773	0.00417171	4.14287e-08	1840	-0.0233983	0.00375209	5.6394e-10	68	0.00434336	7.15895e-08	-0.0228892	0.00269851	-8.48216	2.21048e-17	0.974121	0.00434336	7.15895e-08	1.65461e-14	37	2	135477056	2	135193526	R		rs77468218	NA	TRUE	TMEM163	NM_030923	TSS1500	chr2:135475698-135476993	S_Shore			NA	2:135191717-135193606			NA
cg19731401	-0.00191347	0.0063518	0.763453	62	455	-0.0288673	0.0038564	1.09863e-13	1840	-0.025423	0.00404954	4.33626e-10	68	0.00468768	5.84888e-08	-0.0228701	0.00269646	-8.48154	2.22242e-17	0.0011135	0.00468768	5.84888e-08	1.66076e-14	37	7	2775893	7	2742419	R			NA	NA	GNA12	NM_007353	Body	chr7:2774444-2774655	S_Shore			TRUE	7:2742399-2742473			NA
cg08311343	-0.0588102	0.010278	2.73825e-08	62	455	-0.0417173	0.00747424	2.73949e-08	1840	-0.03145	0.00784574	6.37158e-05	68	0.00908211	0.000534475	-0.0426627	0.00503215	-8.47802	2.29054e-17	0.13476	0.00908211	0.000534475	1.70881e-14	37	7	92324861	7	92162797	R			NA	NA	CDK6;CDK6	NM_001259;NM_001145306	Body;Body					TRUE				NA
cg02141748	-0.0221626	0.00639015	0.000607522	62	455	-0.0261409	0.00555989	2.77202e-06	1840	-0.0355518	0.00482634	2.71596e-13	68	0.00558689	1.97306e-10	-0.0284371	0.00335434	-8.4777	2.29681e-17	0.252035	0.00558689	1.97306e-10	1.71062e-14	37	20	3149470	20	3097470	F			NA	NA	ProSAPiP1	NM_014731	TSS1500	chr20:3148649-3149060	S_Shore			NA		20:3149463-3149647	Unclassified_Cell_type_specific	TRUE
cg21369812	-0.0158685	0.00566157	0.0054244	62	455	-0.0284388	0.0040535	3.19949e-12	1840	-0.0171544	0.00331895	2.63408e-07	68	0.00384196	8.0059e-06	-0.021201	0.00250151	-8.47526	2.3455e-17	0.0748428	0.00384196	8.0059e-06	1.74397e-14	37	10	73471699	10	73141705	R			NA	NA	C10orf105;C10orf105;CDH23	NM_001164375;NM_001168390;NM_022124	3'UTR;3'UTR;Body					NA				NA
cg13657200	-0.0103713	0.00531824	0.0521714	62	455	-0.0258782	0.00377881	1.01572e-11	1840	-0.0193065	0.00322627	2.64313e-09	68	0.00373468	2.34702e-07	-0.0201214	0.00237636	-8.46732	2.51094e-17	0.0569962	0.00373468	2.34702e-07	1.86388e-14	37	9	117266029	9	116305850	R			NA	NA	DFNB31;DFNB31	NM_015404;NM_001083885	Body;TSS1500	chr9:117266468-117268094	N_Shore			NA				NA
cg16678564	-0.0114923	0.00404714	0.00485273	62	455	-0.0223537	0.00314505	1.68237e-12	1840	-0.0154259	0.00314053	9.88011e-07	68	0.00363542	2.20329e-05	-0.0173612	0.00205059	-8.46641	2.53078e-17	0.0860283	0.00363542	2.20329e-05	1.87549e-14	37	8	21916802	8	21972748	F			NA	NA	EPB49;EPB49;EPB49;EPB49;EPB49;EPB49;EPB49;EPB49	NM_001978;NM_001114136;NM_001114138;NM_001114135;NM_001978;NM_001114138;NM_001114137;NM_001114139	1stExon;5'UTR;1stExon;5'UTR;5'UTR;5'UTR;5'UTR;5'UTR	chr8:21914275-21914525	S_Shelf	low-CpG:21972673-21972818		NA		8:21916525-21918452	Unclassified_Cell_type_specific	NA
cg09174162	-0.0273456	0.0116415	0.0195304	62	455	-0.037848	0.00562884	2.35252e-11	1840	-0.0364948	0.00678329	8.47097e-08	68	0.00785222	3.35658e-06	-0.0360452	0.00425785	-8.46558	2.54888e-17	0.717376	0.00785222	3.35658e-06	1.88577e-14	37	7	2150845	7	2117371	F			NA	NA	MAD1L1;MAD1L1;MAD1L1	NM_003550;NM_001013837;NM_001013836	Body;Body;Body	chr7:2154677-2155252	N_Shelf			NA	7:2116939-2117617			NA
cg25414605	-0.02101	0.00559368	0.000210584	62	455	-0.0205329	0.00419407	1.06512e-06	1840	-0.0282034	0.004105	8.92419e-12	68	0.00475188	2.93478e-09	-0.0231997	0.00274105	-8.4638	2.58794e-17	0.434674	0.00475188	2.93478e-09	1.9115e-14	37	11	67182672	11	66939248	F			NA	NA	ATPGD1;ATPGD1	NM_001166222;NM_020811	TSS1500;TSS1500	chr11:67182965-67183393	N_Shore			NA		11:67182597-67182823	Unclassified_Cell_type_specific	NA
cg01753375	-0.0226149	0.0070222	0.00143288	62	455	-0.0253892	0.0049105	2.59025e-07	1840	-0.0285651	0.00417032	1.02876e-11	68	0.00482749	3.27512e-09	-0.0261537	0.00309107	-8.46107	2.64942e-17	0.768078	0.00482749	3.27512e-09	1.95367e-14	37	2	74607600	2	74461108	R			NA	TRUE	DCTN1;DCTN1	NM_004082;NM_001135040	TSS200;TSS200					TRUE		2:74607555-74607743	Unclassified_Cell_type_specific	TRUE
cg24590708	-0.0347385	0.00892515	0.000124617	62	455	-0.0552081	0.00836543	5.37692e-11	1840	-0.0355242	0.00753944	2.65383e-06	68	0.00872754	4.694e-05	-0.0423143	0.00500176	-8.45989	2.67625e-17	0.157123	0.00872754	4.694e-05	1.9702e-14	37	15	52554357	15	50341649	F	rs7169177		NA	NA	MYO5C	NM_018728	Body				DMR	TRUE		15:52553544-52554979	Unclassified	TRUE
cg14164380	-0.0130251	0.00571344	0.0233873	62	455	-0.02264	0.00434485	2.09185e-07	1840	-0.0211824	0.00285114	1.71193e-13	68	0.00330043	1.38009e-10	-0.0201979	0.00238766	-8.4593	2.68976e-17	0.371391	0.00330043	1.38009e-10	1.97689e-14	37	15	48938775	15	46726067	R			NA	NA	FBN1	NM_000138	TSS1500	chr15:48936810-48938577	S_Shore			NA				NA
cg19991723	-0.0142562	0.00525768	0.0071183	62	455	-0.0249118	0.00450223	3.59545e-08	1840	-0.0274249	0.00387135	2.03646e-12	68	0.00448141	9.3752e-10	-0.0229877	0.00271861	-8.45567	2.77489e-17	0.140789	0.00448141	9.3752e-10	2.0361e-14	37	8	50020154	8	50182707	R			NA	NA								TRUE				NA
cg14025021	-0.0210726	0.00618875	0.000759969	62	455	-0.0253514	0.00523493	1.38776e-06	1840	-0.0321636	0.0044834	1.08025e-12	68	0.00518991	5.74268e-10	-0.0267672	0.00316662	-8.45293	2.84087e-17	0.367697	0.00518991	5.74268e-10	2.08109e-14	37	15	43809510	15	41596802	F			NA	NA	MAP1A	NM_002373	TSS1500					TRUE				TRUE
cg03010887	-0.0359831	0.00967556	0.000242273	62	455	-0.0409702	0.00696569	4.81202e-09	1840	-0.037401	0.00670498	2.82099e-08	68	0.00776157	1.44469e-06	-0.0386207	0.00456953	-8.45179	2.86878e-17	0.899077	0.00776157	1.44469e-06	2.09809e-14	37	16	85600235	16	84157736	F			NA	NA								NA	16:84157503-84158319			NA
cg15441416	-0.0168135	0.00637867	0.00886634	62	455	-0.0188858	0.00297879	2.88158e-10	1840	-0.02037	0.00355425	1.17617e-08	68	0.00411434	7.38427e-07	-0.019073	0.00225675	-8.45152	2.87541e-17	0.891902	0.00411434	7.38427e-07	2.09949e-14	37	19	54972047	19	59663859	F			NA	NA	LENG8	NM_052925	Body	chr19:54971878-54972090	Island			NA	19:59663762-59664545	19:54971904-54972090	Gene_Associated_Cell_type_specific	NA
cg23803468	-0.00986129	0.00534911	0.0663224	62	455	-0.0258261	0.0035669	6.53963e-13	1840	-0.0204761	0.00379205	7.60812e-08	68	0.00438962	3.09127e-06	-0.0207755	0.00245851	-8.45043	2.90238e-17	0.0456665	0.00438962	3.09127e-06	2.11573e-14	37	15	43513504	15	41300796	F			NA	NA	EPB42;EPB42	NM_001114134;NM_000119	TSS200;TSS200					NA				NA
cg17508639	-0.0458719	0.00955563	2.59701e-06	62	455	-0.0320834	0.0058107	3.84078e-08	1840	-0.0286318	0.0055057	2.2273e-07	68	0.0063733	7.04052e-06	-0.0330963	0.00391667	-8.45013	2.90974e-17	0.315284	0.0063733	7.04052e-06	2.11763e-14	37	1	20959617	1	20832204	R			NA	NA	PINK1	NM_032409	TSS1500	chr1:20960045-20960551	N_Shore			NA		1:20959206-20960060	Promoter_Associated	NA
cg17181255	-0.00682412	0.00316523	0.0319506	62	455	-0.0101859	0.00140506	6.13183e-13	1840	-0.00844763	0.0018621	6.11401e-06	68	0.00215554	8.89059e-05	-0.00932214	0.00110326	-8.44964	2.92197e-17	0.558388	0.00215554	8.89059e-05	2.12307e-14	37	12	6419412	12	6289673	R			NA	NA	PLEKHG6;PLEKHG6	NM_001144856;NM_018173	TSS1500;TSS200	chr12:6419603-6420024	N_Shore			NA		12:6419335-6420291	Unclassified_Cell_type_specific	TRUE
cg17333042	-0.0312977	0.00666875	4.23999e-06	62	455	-0.0274152	0.00466873	5.09393e-09	1840	-0.0179567	0.00358694	6.12449e-07	68	0.00415219	1.52775e-05	-0.0237646	0.0028131	-8.44786	2.96702e-17	0.146318	0.00415219	1.52775e-05	2.15229e-14	37	10	102822201	10	102812191	F			NA	NA	KAZALD1	NM_030929	5'UTR	chr10:102820488-102822874	Island		CDMR	TRUE				NA
cg26120842	-0.0161299	0.00556811	0.00407132	62	455	-0.0249777	0.00344388	5.98792e-13	1840	-0.0152911	0.0035002	1.32519e-05	68	0.00405177	0.000160699	-0.0200453	0.00237369	-8.44479	3.04586e-17	0.14068	0.00405177	0.000160699	2.2059e-14	37	10	89840122	10	89830102	R			NA	NA								TRUE		10:89840068-89840231	Unclassified_Cell_type_specific	NA
cg00143376	-0.0155227	0.00658202	0.0190537	62	455	-0.0319845	0.004625	6.40598e-12	1840	-0.0256297	0.00470687	5.92526e-08	68	0.00544859	2.55219e-06	-0.0262459	0.0031081	-8.44436	3.05721e-17	0.122061	0.00544859	2.55219e-06	2.21053e-14	37	2	232394702	2	232102946	R			NA	TRUE	NMUR1	NM_006056	Body	chr2:232394763-232395337	N_Shore			NA				NA
cg21858516	-0.0283363	0.00735657	0.000145808	62	455	-0.031034	0.00486366	2.22346e-10	1840	-0.021171	0.00433737	1.15323e-06	68	0.00502087	2.48018e-05	-0.0266415	0.00315566	-8.44246	3.1074e-17	0.357748	0.00502087	2.48018e-05	2.24319e-14	37	14	59103353	14	58173106	F			NA	NA	DACT1;DACT1	NM_016651;NM_001079520	TSS1500;TSS1500	chr14:59104299-59105577	N_Shore		RDMR	NA				NA
cg06996423	-0.0229232	0.00539209	2.91168e-05	62	455	-0.0194954	0.00363388	9.12317e-08	1840	-0.0174917	0.00301823	8.09772e-09	68	0.00349385	5.5449e-07	-0.0192546	0.00228192	-8.43789	3.23129e-17	0.697022	0.00349385	5.5449e-07	2.32885e-14	37	10	105236233	10	105226223	R			NA	NA	CALHM3	NM_001129742	Body	chr10:105232921-105233456	S_Shelf			TRUE		10:105236178-105236349	Unclassified_Cell_type_specific	TRUE
cg00291478	-0.0230459	0.00811106	0.00482801	62	455	-0.0392512	0.00586075	2.81151e-11	1840	-0.0284822	0.00532699	1.01571e-07	68	0.00616643	3.85761e-06	-0.0317521	0.00376323	-8.43745	3.24326e-17	0.215393	0.00616643	3.85761e-06	2.33371e-14	37	10	121301041	10	121291031	F			NA	NA	RGS10	NM_001005339	Body	chr10:121301478-121303169	N_Shore		CDMR	NA				NA
cg19529621	-0.0197266	0.00932402	0.0352684	62	455	-0.048234	0.00620602	1.27387e-14	1840	-0.026139	0.00578499	6.65687e-06	68	0.00669661	9.4886e-05	-0.0345036	0.00409047	-8.43512	3.3086e-17	0.0112949	0.00669661	9.4886e-05	2.37689e-14	37	12	2045722	12	1915983	R			NA	NA								TRUE				TRUE
cg01792532	-0.0234472	0.0076315	0.00233553	62	455	-0.0261994	0.00391946	3.06357e-11	1840	-0.0232035	0.00482604	1.65805e-06	68	0.00558654	3.27482e-05	-0.0249462	0.00295777	-8.43413	3.33667e-17	0.88775	0.00558654	3.27482e-05	2.3932e-14	37	1	33284208	1	33056795	F	rs3737252		NA	NA	YARS;S100PBP;S100PBP	NM_003680;NM_022753;NM_001017406	TSS1500;5'UTR;5'UTR	chr1:33282675-33283906	S_Shore			NA				NA
cg01185080	-0.0370699	0.0130222	0.00474945	62	455	-0.0487107	0.00729746	3.26198e-11	1840	-0.035237	0.00677658	2.23415e-07	68	0.00784445	7.05711e-06	-0.0416833	0.0049431	-8.43261	3.38031e-17	0.421439	0.00784445	7.05711e-06	2.42061e-14	37	15	90543813	15	88344817	F	rs62020558		NA	TRUE	ZNF710	NM_198526	TSS1500	chr15:90543410-90543835	Island			NA	15:88344415-88345165			NA
cg05131526	-0.0312194	0.00953865	0.00119987	62	455	-0.0366615	0.00671469	5.41155e-08	1840	-0.0346702	0.00539979	1.75258e-10	68	0.00625071	2.91278e-08	-0.0347764	0.00412518	-8.43025	3.44919e-17	0.89666	0.00625071	2.91278e-08	2.46597e-14	37	15	91447195	15	89248199	R			NA	NA	MAN2A2	NM_006122	TSS1500	chr15:91445563-91446768	S_Shore		RDMR	NA		15:91446968-91447517	Promoter_Associated	NA
cg18133072	-0.0141818	0.00426342	0.000999111	62	455	-0.0228199	0.00342767	3.66385e-11	1840	-0.0131723	0.00250227	1.58587e-07	68	0.00289658	5.4274e-06	-0.0165531	0.00196375	-8.42933	3.47636e-17	0.0815014	0.00289658	5.4274e-06	2.48142e-14	37	1	28287782	1	28160369	F			NA	NA	XKR8	NM_018053	Body	chr1:28286019-28286838	S_Shore			NA		1:28287754-28288358	Promoter_Associated	TRUE
cg19913118	-0.0168583	0.00803248	0.036746	62	455	-0.0287285	0.00516166	2.9942e-08	1840	-0.0292152	0.00411642	1.85676e-12	68	0.00476511	8.72915e-10	-0.0270541	0.00320959	-8.42913	3.4825e-17	0.382494	0.00476511	8.72915e-10	2.48184e-14	37	1	145471701	1	144183058	F			NA	NA	POLR3GL;ANKRD34A	NM_032305;NM_001039888	TSS1500;5'UTR	chr1:145472980-145474702	N_Shore			TRUE		1:145471522-145471985	Unclassified_Cell_type_specific	NA
cg03698343	-0.0133323	0.0049729	0.00778207	62	455	-0.0172263	0.0034779	7.97396e-07	1840	-0.0214103	0.00288071	1.67687e-13	68	0.00333466	1.35814e-10	-0.0182533	0.00216656	-8.42502	3.6069e-17	0.374808	0.00333466	1.35814e-10	2.5664e-14	37	9	139921892	9	139041713	F			NA	NA	ABCA2;C9orf139;ABCA2	NM_001606;NM_207511;NM_212533	Body;TSS200;Body	chr9:139922197-139923447	N_Shore			NA		9:139921780-139922052	Promoter_Associated_Cell_type_specific	NA
cg11466832	-0.0204043	0.00607873	0.000899683	62	455	-0.0279987	0.00479983	6.40695e-09	1840	-0.0290144	0.00482532	2.22189e-09	68	0.00558572	2.05398e-07	-0.0263115	0.00312317	-8.42459	3.62005e-17	0.521507	0.00558572	2.05398e-07	2.57165e-14	37	2	11885560	2	11803011	R			NA	NA	LPIN1	NM_145693	TSS1500	chr2:11886249-11887207	N_Shore			TRUE		2:11884075-11886107	Unclassified	NA
cg05726109	-0.0131868	0.0132988	0.322272	62	455	-0.0529519	0.0077905	1.43859e-11	1840	-0.0520225	0.00806349	1.43628e-10	68	0.00933417	2.49896e-08	-0.0459444	0.00545476	-8.42281	3.67552e-17	0.025985	0.00933417	2.49896e-08	2.6069e-14	37	22	19709755	22	18089755	F			NA	TRUE	SEPT5;GP1BB	NM_002688;NM_000407	Body;TSS1500	chr22:19709081-19712106	Island			NA	22:18089168-18092190			NA
cg09965085	-0.0217742	0.00658058	0.00106121	62	455	-0.0212257	0.00413147	3.07809e-07	1840	-0.0243507	0.00361531	2.22413e-11	68	0.00418503	5.93667e-09	-0.0226027	0.00268439	-8.42005	3.7633e-17	0.86011	0.00418503	5.93667e-09	2.66492e-14	37	16	85519176	16	84076677	F	rs80257148		NA	NA				chr16:85519109-85519357	Island			NA	16:84076562-84076810			NA
cg15037004	-0.0178166	0.00761589	0.0200283	62	455	-0.039979	0.00573083	4.2168e-12	1840	-0.0330115	0.00606035	5.86177e-08	68	0.00701537	2.5312e-06	-0.0322789	0.0038346	-8.41781	3.83574e-17	0.0664593	0.00701537	2.5312e-06	2.71191e-14	37	5	71803938	5	71839694	R			NA	TRUE	ZNF366	NM_152625	TSS1500					NA				NA
cg12800962	-0.0181889	0.0106145	0.0877253	62	455	-0.0494802	0.00685495	7.67282e-13	1840	-0.0367811	0.0067623	6.12603e-08	68	0.00782793	2.61822e-06	-0.0390453	0.00463858	-8.41751	3.84554e-17	0.04368	0.00782793	2.61822e-06	2.71455e-14	37	20	48626437	20	48059844	R			NA	NA				chr20:48626436-48626976	Island			NA	20:48059844-48060360			NA
cg03164800	-0.00869899	0.00255187	0.000749681	62	455	-0.0141405	0.00178638	4.21125e-15	1840	-0.00511716	0.00130974	9.70774e-05	68	0.00151613	0.000737766	-0.00886191	0.00105294	-8.41632	3.88507e-17	0.000600322	0.00151613	0.000737766	2.73811e-14	37	4	80836552	4	81055576	R			NA	NA	ANTXR2	NM_058172	Body					TRUE				NA
cg05557932	-0.0123008	0.00591052	0.0383396	62	455	-0.0297685	0.00469076	2.77187e-10	1840	-0.0259081	0.00396875	8.75469e-11	68	0.00459416	1.70681e-08	-0.0241456	0.00286944	-8.41474	3.93771e-17	0.0608041	0.00459416	1.70681e-08	2.77084e-14	37	16	3929351	16	3869352	F			NA	NA	CREBBP;CREBBP	NM_001079846;NM_004380	Body;Body	chr16:3929483-3929769	N_Shore		RDMR	NA	16:3869342-3870686			NA
cg04334651	-0.0155033	0.00651318	0.0179781	62	455	-0.0247059	0.00419642	4.65266e-09	1840	-0.0214041	0.00327379	8.20383e-11	68	0.00378969	1.62347e-08	-0.0217268	0.00258209	-8.41442	3.9485e-17	0.490594	0.00378969	1.62347e-08	2.77406e-14	37	16	4366968	16	4306969	F			NA	NA				chr16:4366358-4366982	Island			NA				NA
cg08643824	-0.0171076	0.00655388	0.00954042	62	455	-0.0355234	0.00504501	2.67939e-12	1840	-0.0260871	0.00512562	3.98398e-07	68	0.00593334	1.0991e-05	-0.0278644	0.0033154	-8.40453	4.29581e-17	0.0785405	0.00593334	1.0991e-05	3.01332e-14	37	11	58294523	11	58051099	F		rs11543064	NA	NA	LPXN;LPXN	NM_001143995;NM_004811	3'UTR;3'UTR					NA				NA
cg16634404	-0.0183191	0.00576476	0.00165282	62	455	-0.0247467	0.00402963	1.00117e-09	1840	-0.0213047	0.00377964	2.02317e-08	68	0.00437525	1.11954e-06	-0.0221533	0.00263602	-8.4041	4.31172e-17	0.639482	0.00437525	1.11954e-06	3.01973e-14	37	6	33161438	6	33269416	F	rs2975108		NA	NA	COL11A2;RXRB;COL11A2;COL11A2;COL11A2	NM_080679;NM_021976;NM_001163771;NM_080681;NM_080680	TSS1500;3'UTR;TSS1500;TSS1500;TSS1500	chr6:33159991-33160263	S_Shore			NA				TRUE
cg09768617	-0.015071	0.00441061	0.000728525	62	455	-0.0254073	0.00338627	9.65265e-14	1840	-0.012334	0.00340508	0.000300581	68	0.00394167	0.00175323	-0.0186441	0.00221961	-8.39969	4.47641e-17	0.0272142	0.00394167	0.00175323	3.13016e-14	37	7	27908936	7	27875461	F			NA	NA	JAZF1	NM_175061	Body					TRUE				NA
cg00519063	-0.0171638	0.00653968	0.00915944	62	455	-0.035779	0.00540424	4.68194e-11	1840	-0.0273331	0.00475505	1.06551e-08	68	0.00550437	6.84503e-07	-0.0279003	0.00332177	-8.39921	4.49495e-17	0.0893077	0.00550437	6.84503e-07	3.1382e-14	37	1	94373434	1	94146022	F	rs17879576		NA	NA	GCLM	NM_002061	Body	chr1:94374369-94375467	N_Shore			NA				NA
cg22586569	-0.0176113	0.00721753	0.015314	62	455	-0.0356158	0.00548942	1.11449e-10	1840	-0.0340095	0.00567238	2.46659e-09	68	0.00656626	2.22564e-07	-0.0305496	0.00363756	-8.39837	4.52714e-17	0.114012	0.00656626	2.22564e-07	3.15574e-14	37	7	5524963	7	5491489	F			NA	NA	FBXL18	NM_024963	Body	chr7:5526389-5526693	N_Shore			NA				NA
cg02452639	-0.0146978	0.00857578	0.0876753	62	455	-0.0350797	0.00573481	1.1621e-09	1840	-0.0386955	0.00560332	7.00938e-12	68	0.00648631	2.43563e-09	-0.0322585	0.00384126	-8.39789	4.54582e-17	0.0665378	0.00648631	2.43563e-09	3.16381e-14	37	1	116710227	1	116511750	R			NA	NA				chr1:116710157-116710546	Island			TRUE	1:116511728-116512802			NA
cg15408889	-0.0219563	0.00640225	0.000697191	62	455	-0.0288498	0.00440538	7.50561e-11	1840	-0.0219546	0.00457604	1.744e-06	68	0.00529715	3.40399e-05	-0.0251396	0.00299393	-8.39685	4.58609e-17	0.517357	0.00529715	3.40399e-05	3.1822e-14	37	5	118623661	5	118651560	F			NA	NA	TNFAIP8	NM_001077654	Body					TRUE				NA
cg03845837	-0.0295072	0.0080804	0.000311602	62	455	-0.0345366	0.00563705	1.09455e-09	1840	-0.0266755	0.0050789	1.69054e-07	68	0.00587926	5.69981e-06	-0.0305156	0.00363418	-8.39684	4.58651e-17	0.621576	0.00587926	5.69981e-06	3.1822e-14	37	16	67203406	16	65760907	F			NA	NA	HSF4;HSF4	NM_001040667;NM_001538	Body;Body	chr16:67204208-67204637	N_Shore		RDMR	NA		16:67203266-67204985	Unclassified	NA
cg19998073	-0.0197473	0.00635206	0.00207483	62	455	-0.0272985	0.00421176	1.16314e-10	1840	-0.020255	0.00386509	1.79976e-07	68	0.00447417	5.97985e-06	-0.0231875	0.00276172	-8.39603	4.61829e-17	0.432658	0.00447417	5.97985e-06	3.19928e-14	37	14	89078443	14	88148196	F			NA	NA	ZC3H14;ZC3H14;ZC3H14;ZC3H14;ZC3H14;ZC3H14	NM_001160103;NM_024824;NM_001160104;NM_207661;NM_207662;NM_207660	3'UTR;3'UTR;3'UTR;3'UTR;3'UTR;3'UTR					NA				NA
cg06783429	-0.0319943	0.0132737	0.0165915	62	455	-0.0468471	0.00719517	9.60812e-11	1840	-0.0504571	0.00897522	2.20202e-08	68	0.0103896	1.19471e-06	-0.0453625	0.00540298	-8.39584	4.62575e-17	0.522749	0.0103896	1.19471e-06	3.19948e-14	37	7	127673038	7	127460274	F			NA	NA	SND1	NM_014390	Body	chr7:127671158-127672853	S_Shore			NA	7:127457643-127460321			TRUE
cg09581649	-0.012128	0.00515056	0.0192388	62	455	-0.0282446	0.00398476	1.92901e-12	1840	-0.0161929	0.00295836	5.06252e-08	68	0.00342454	2.26214e-06	-0.0194507	0.00231904	-8.38739	4.97052e-17	0.0202753	0.00342454	2.26214e-06	3.43262e-14	37	16	4572735	16	4512736	F			NA	NA	C16orf5	NM_013399	5'UTR					TRUE				NA
cg10777461	-0.0507803	0.0118715	2.60797e-05	62	455	-0.0426315	0.0074868	1.43962e-08	1840	-0.0555359	0.0105848	1.74059e-07	68	0.0122528	5.82864e-06	-0.0471818	0.00562571	-8.38682	4.99486e-17	0.629349	0.0122528	5.82864e-06	3.4441e-14	37	1	10590481	1	10513068	R			NA	NA	PEX14	NM_004565	Body					NA	1:10513054-10513262			NA
cg18436214	-0.0163561	0.00857375	0.0574678	62	455	-0.0478457	0.00688311	5.01159e-12	1840	-0.0472963	0.00775895	1.34308e-09	68	0.00898163	1.39508e-07	-0.0386075	0.00460741	-8.37944	5.31779e-17	0.00877024	0.00898163	1.39508e-07	3.66111e-14	37	10	77268489	10	76938495	R			NA	NA								TRUE				NA
cg09315264	-0.0155862	0.00653234	0.0177066	62	455	-0.0289417	0.00453283	2.16604e-10	1840	-0.0255455	0.00427927	2.88478e-09	68	0.00495362	2.51017e-07	-0.024942	0.0029767	-8.37909	5.33365e-17	0.241148	0.00495362	2.51017e-07	3.66637e-14	37	1	36805322	1	36577909	F			NA	NA	STK40	NM_032017	3'UTR	chr1:36807362-36807584	N_Shelf			NA				NA
cg24247370	-0.0172337	0.00657683	0.00927019	62	455	-0.0318869	0.00515919	7.84436e-10	1840	-0.031032	0.00500967	7.30882e-10	68	0.00579911	8.7388e-08	-0.0278594	0.00332551	-8.37748	5.40732e-17	0.172133	0.00579911	8.7388e-08	3.71129e-14	37	13	99142703	13	97940704	R			NA	NA	STK24;STK24	NM_003576;NM_001032296	Body;Body					TRUE				NA
cg17611742	-0.0227186	0.00680676	0.000960989	62	455	-0.0261299	0.00427841	1.23257e-09	1840	-0.0244089	0.00450402	6.83072e-08	68	0.00521378	2.84613e-06	-0.0249181	0.00297481	-8.37637	5.45865e-17	0.907475	0.00521378	2.84613e-06	3.74077e-14	37	1	197745238	1	196011861	R			NA	NA	DENND1B;DENND1B	NM_144977;NM_001142795	TSS1500;TSS1500	chr1:197743931-197744788	S_Shore			TRUE		1:197745048-197745377	Promoter_Associated	NA
cg27565650	-0.015728	0.0070016	0.0254731	62	455	-0.0334036	0.00480407	4.94274e-12	1840	-0.0176663	0.00307212	1.05146e-08	68	0.00355623	6.77566e-07	-0.0221645	0.00264628	-8.37571	5.4894e-17	0.0190797	0.00355623	6.77566e-07	3.75607e-14	37	1	88151065	1	87923653	F			NA	NA								TRUE				NA
cg01201215	-0.033178	0.00826686	7.71663e-05	62	455	-0.0305673	0.00585113	1.94794e-07	1840	-0.0306864	0.00512844	2.65229e-09	68	0.0059366	2.35327e-07	-0.0311431	0.0037212	-8.36909	5.8067e-17	0.962619	0.0059366	2.35327e-07	3.9671e-14	37	5	151137430	5	151117623	F			NA	NA	ATOX1	NM_004045	Body	chr5:151137992-151138418	N_Shore			NA				NA
cg01528492	-0.0168979	0.00687544	0.0145975	62	455	-0.0324386	0.00518595	4.92825e-10	1840	-0.0323796	0.0052231	7.09036e-10	68	0.00604618	8.53725e-08	-0.0285833	0.00341609	-8.36727	5.8969e-17	0.146936	0.00604618	8.53725e-08	4.0177e-14	37	8	91659356	8	91728532	R			NA	NA	TMEM64;TMEM64	NM_001146273;NM_001008495	TSS1500;TSS1500	chr8:91657389-91658779	S_Shore			NA				NA
cg08030282	-0.0121417	0.00444817	0.00674896	62	455	-0.0174421	0.00304701	1.20989e-08	1840	-0.0137652	0.00213316	1.42373e-10	68	0.00246931	2.48213e-08	-0.0147396	0.00176158	-8.36723	5.89879e-17	0.526377	0.00246931	2.48213e-08	4.0177e-14	37	1	160967582	1	159234206	R			NA	NA	F11R	NM_016946	3'UTR					NA		1:160966691-160967740	Unclassified	NA
cg23516824	-0.0324301	0.00765535	3.10025e-05	62	455	-0.0314173	0.00473356	4.19501e-11	1840	-0.0169117	0.00391085	1.6183e-05	68	0.00452714	0.00018725	-0.0251678	0.00300848	-8.36562	5.98006e-17	0.0505688	0.00452714	0.00018725	4.06685e-14	37	5	76134399	5	76170155	F			NA	NA								TRUE				NA
cg06930433	-0.0183864	0.00863956	0.0342093	62	455	-0.0457366	0.00689154	4.20908e-11	1840	-0.0441735	0.00716534	8.77668e-10	68	0.00829449	1.00592e-07	-0.0377931	0.00451809	-8.36484	6.01978e-17	0.0307155	0.00829449	1.00592e-07	4.08763e-14	37	16	74639988	16	73197489	F			NA	NA	GLG1;GLG1;GLG1;GLG1;GLG1	NR_027264;NM_001145666;NM_001145667;NR_027265;NM_012201	Body;Body;Body;Body;Body	chr16:74640468-74641197	N_Shore			NA		16:74639857-74641612	Promoter_Associated	NA
cg24099956	-0.0232776	0.00712966	0.00123315	62	455	-0.0330779	0.00462236	1.19415e-12	1840	-0.0188452	0.00464489	5.19017e-05	68	0.00537685	0.00045683	-0.0262991	0.00314557	-8.36067	6.23637e-17	0.119306	0.00537685	0.00045683	4.22827e-14	37	11	113907379	11	113412589	R			NA	NA				chr11:113906920-113907332	S_Shore			NA		11:113905969-113907630	Unclassified	TRUE
cg04972436	-0.0123855	0.00647601	0.0568442	62	455	-0.0221589	0.00358939	8.20059e-10	1840	-0.0236712	0.00371485	2.39124e-10	68	0.00430025	3.69979e-08	-0.0211864	0.0025356	-8.35558	6.51117e-17	0.323976	0.00430025	3.69979e-08	4.40788e-14	37	17	76212679	17	73724274	F			NA	NA	BIRC5;BIRC5;EPR1;BIRC5	NM_001012270;NM_001012271;NR_002219;NM_001168	Body;Body;Body;Body	chr17:76210129-76210627	S_Shelf			NA				NA
cg26551026	-0.0243783	0.00682414	0.000417307	62	455	-0.0306937	0.00556044	3.87155e-08	1840	-0.0336849	0.00554376	1.51336e-09	68	0.00641736	1.52912e-07	-0.0298872	0.00357831	-8.35234	6.69233e-17	0.599624	0.00641736	1.52912e-07	4.52366e-14	37	18	20717693	18	18971691	F	rs7226820		NA	NA	CABLES1;CABLES1	NM_001100619;NR_023359	Body;Body	chr18:20714968-20717071	S_Shore		RDMR	NA				NA
cg14699734	-0.0346553	0.00702187	1.38594e-06	62	455	-0.0301953	0.00539603	2.52575e-08	1840	-0.0220969	0.00473497	3.29783e-06	68	0.00548112	5.54317e-05	-0.0281579	0.0033727	-8.34877	6.89769e-17	0.329307	0.00548112	5.54317e-05	4.65542e-14	37	19	5806164	19	5757164	R			NA	NA				chr19:5803734-5806023	S_Shore			NA		19:5805920-5806167	Unclassified	NA
cg06761203	-0.0110891	0.00565006	0.0506908	62	455	-0.0290009	0.00421861	8.48856e-12	1840	-0.0181678	0.00309161	5.02473e-09	68	0.00357879	3.84403e-07	-0.0205047	0.00245742	-8.34401	7.1814e-17	0.0265221	0.00357879	3.84403e-07	4.83958e-14	37	12	58147888	12	56434155	R			NA	NA	2024-03-09	NM_138396	TSS1500	chr12:58148888-58149781	N_Shore			NA				NA
cg11878045	-0.0162797	0.00708937	0.0224049	62	455	-0.0302762	0.00443832	1.21791e-11	1840	-0.0217632	0.00408827	1.15343e-07	68	0.00473251	4.25243e-06	-0.0245648	0.00294486	-8.34158	7.33029e-17	0.185242	0.00473251	4.25243e-06	4.93247e-14	37	11	2482536	11	2439112	F	rs2075873		NA	NA	KCNQ1;KCNQ1	NM_000218;NM_181798	Body;TSS200					NA				NA
cg03605542	-0.0209458	0.00789044	0.00840183	62	455	-0.0315101	0.00521231	1.80091e-09	1840	-0.0273508	0.00452873	1.89282e-09	68	0.00524239	1.81597e-07	-0.0279135	0.00334719	-8.33937	7.46875e-17	0.530613	0.00524239	1.81597e-07	5.01806e-14	37	5	59929339	5	59965096	R			NA	NA	DEPDC1B;DEPDC1B	NM_018369;NM_001145208	Body;Body					TRUE				TRUE
cg04834097	-0.0128381	0.00616117	0.0381056	62	455	-0.021215	0.00379123	2.5259e-08	1840	-0.023887	0.00343193	4.8214e-12	68	0.00397275	1.82449e-09	-0.0208924	0.00250567	-8.33807	7.5512e-17	0.319123	0.00397275	1.82449e-09	5.06258e-14	37	7	63774078	7	63411513	R			NA	NA	LOC728927	NM_001170905	5'UTR					NA		7:63774065-63774850	Promoter_Associated	TRUE
cg13984060	-0.0125844	0.00704008	0.0749477	62	455	-0.032021	0.00428733	1.24349e-13	1840	-0.0179871	0.00360244	6.54904e-07	68	0.00417013	1.6082e-05	-0.0229422	0.00275153	-8.33797	7.5577e-17	0.0177678	0.00417013	1.6082e-05	5.06258e-14	37	8	145018816	8	145090804	R			NA	NA	PLEC1;PLEC1;PLEC1;PLEC1;PLEC1;PLEC1	NM_000445;NM_201378;NM_201381;NM_201379;NM_201382;NM_201380	Body;Body;1stExon;Body;TSS1500;Body	chr8:145018815-145019214	Island			TRUE		8:145018797-145018936	Unclassified_Cell_type_specific	NA
cg00374747	-0.0274149	0.00703787	0.000123098	62	455	-0.0285488	0.00402773	1.93033e-12	1840	-0.0158217	0.00499421	0.00156197	68	0.00578122	0.00620516	-0.0249364	0.00299139	-8.33606	7.68072e-17	0.181398	0.00578122	0.00620516	5.13728e-14	37	11	2907930	11	2864506	F			NA	NA	CDKN1C;CDKN1C;CDKN1C	NM_000076;NM_001122631;NM_001122630	TSS1500;TSS1500;TSS1500	chr11:2905023-2907024	S_Shore			NA				NA
cg11844856	-0.0234197	0.0057039	5.30978e-05	62	455	-0.026301	0.00502056	1.80312e-07	1840	-0.0300592	0.00510835	4.79705e-09	68	0.00591334	3.70957e-07	-0.026492	0.00317809	-8.33584	7.6948e-17	0.72055	0.00591334	3.70957e-07	5.13898e-14	37	14	59000503	14	58070256	R			NA	NA	KIAA0586	NM_014749	Body					TRUE				NA
cg10414946	-0.00839455	0.00456062	0.0667449	62	455	-0.0316138	0.00428733	2.49507e-13	1840	-0.0216899	0.00370958	5.9812e-09	68	0.00429415	4.3943e-07	-0.0210561	0.00252608	-8.33547	7.71929e-17	0.00101101	0.00429415	4.3943e-07	5.14763e-14	37	11	59856358	11	59612934	F			NA	TRUE	MS4A2;MS4A2	NM_000139;NM_001142303	Body;Body					NA				NA
cg07705835	-0.0215693	0.00579048	0.000236859	62	455	-0.0237535	0.00396811	2.5779e-09	1840	-0.0192655	0.00368955	1.98979e-07	68	0.00427096	6.45786e-06	-0.0216531	0.00259802	-8.33446	7.78531e-17	0.743455	0.00427096	6.45786e-06	5.18391e-14	37	3	9959128	3	9934128	F	rs75116348		NA	TRUE	IL17RC;IL17RC;IL17RC	NM_153460;NM_153461;NM_032732	Body;1stExon;Body	chr3:9956822-9957664	S_Shore			NA				NA
cg06665453	-0.0192597	0.00617403	0.00200358	62	455	-0.0261748	0.00485089	7.70166e-08	1840	-0.0259645	0.00399515	1.05733e-10	68	0.00462472	1.97388e-08	-0.0245188	0.00294263	-8.33228	7.93009e-17	0.625057	0.00462472	1.97388e-08	5.27244e-14	37	17	73520759	17	71032354	F			NA	NA	TSEN54;LLGL2;LLGL2;LLGL2	NM_207346;NM_001031803;NM_001015002;NM_004524	3'UTR;TSS1500;TSS1500;TSS1500	chr17:73520956-73522540	N_Shore			NA		17:73520743-73520787	Unclassified	NA
cg22161562	-0.0294402	0.00949669	0.00213495	62	455	-0.0523976	0.00787612	3.78341e-11	1840	-0.0453571	0.00899409	5.06868e-07	68	0.0104114	1.32168e-05	-0.0436282	0.005239	-8.32758	8.25131e-17	0.173838	0.0104114	1.32168e-05	5.47488e-14	37	2	25198596	2	25052100	R			NA	NA				chr2:25194140-25195214	S_Shelf			NA		2:25198343-25198674	Unclassified_Cell_type_specific	NA
cg04344749	-0.0170908	0.00572199	0.00307178	62	455	-0.0219369	0.00379529	8.75336e-09	1840	-0.0208498	0.00343337	1.54574e-09	68	0.00397441	1.5542e-07	-0.0206089	0.00247481	-8.32747	8.2591e-17	0.777188	0.00397441	1.5542e-07	5.47488e-14	37	1	25871814	1	25744401	F	rs75323356		NA	NA	LDLRAP1	NM_015627	Body	chr1:25869893-25871042	S_Shore			NA				NA
cg00127150	-0.0150495	0.00575205	0.00937627	62	455	-0.031051	0.00436744	1.65818e-12	1840	-0.0211546	0.00439758	1.63744e-06	68	0.00509056	3.24363e-05	-0.023912	0.00287196	-8.32603	8.36007e-17	0.0692805	0.00509056	3.24363e-05	5.53358e-14	37	22	22862144	22	21192144	R			NA	NA	ZNF280B	NM_080764	5'UTR	chr22:22862623-22863220	N_Shore			NA				NA
cg07730360	-0.0124311	0.0070094	0.0772504	62	455	-0.0360376	0.00480902	1.03394e-13	1840	-0.0218598	0.00435936	5.86948e-07	68	0.00504632	1.4788e-05	-0.025954	0.00311797	-8.32402	8.50269e-17	0.01242	0.00504632	1.4788e-05	5.61965e-14	37	3	128845626	3	130328316	F			NA	NA								TRUE				NA
cg03739378	-0.0129727	0.0044736	0.00403377	62	455	-0.0163594	0.00335395	1.16595e-06	1840	-0.0215191	0.00295521	5.00072e-13	68	0.00342091	3.16489e-10	-0.0175706	0.0021114	-8.32176	8.66653e-17	0.283797	0.00342091	3.16489e-10	5.71946e-14	37	7	105295865	7	105083101	R			NA	NA	ATXN7L1;ATXN7L1	NM_020725;NM_138495	Body;Body					TRUE				NA
cg00911776	-0.0195959	0.00826309	0.0184027	62	455	-0.0424737	0.00640578	4.38231e-11	1840	-0.0299457	0.00520699	1.04812e-08	68	0.00602753	6.75914e-07	-0.032256	0.00387665	-8.32058	8.75372e-17	0.0805151	0.00602753	6.75914e-07	5.76847e-14	37	7	130682239	7	130332779	R			NA	NA	FLJ43663;FLJ43663	NR_015431;NR_024153	Body;Body					TRUE				NA
cg19442470	-0.0118923	0.00395875	0.00290871	62	455	-0.0187559	0.00280125	2.84491e-11	1840	-0.0190875	0.00392644	1.27298e-06	68	0.00454519	2.67504e-05	-0.0169954	0.00204272	-8.31996	8.79908e-17	0.321655	0.00454519	2.67504e-05	5.78981e-14	37	8	27470225	8	27526142	R			NA	NA	CLU;CLU;CLU	NM_001171138;NM_001831;NM_203339	TSS1500;Body;TSS1500	chr8:27471954-27472523	N_Shore			NA				NA
cg09411874	-0.0232764	0.00669584	0.00059044	62	455	-0.0271985	0.00430201	3.22637e-10	1840	-0.0173714	0.0033488	2.38629e-07	68	0.00387651	7.42239e-06	-0.0220094	0.00264552	-8.31953	8.83158e-17	0.231984	0.00387651	7.42239e-06	5.80263e-14	37	12	121905955	12	120390338	F			NA	NA	KDM2B;KDM2B	NM_032590;NM_001005366	Body;Body	chr12:121905463-121905956	Island			NA				NA
cg18204200	-0.0163444	0.00666445	0.014807	62	455	-0.0260997	0.00469307	3.06971e-08	1840	-0.0276635	0.00407965	1.63908e-11	68	0.00472254	4.69138e-09	-0.0247736	0.00297803	-8.31879	8.88623e-17	0.358073	0.00472254	4.69138e-09	5.82996e-14	37	14	67999431	14	67069184	R			NA	NA	PLEKHH1	NM_020715	TSS1500	chr14:67999568-68000440	N_Shore			NA		14:67999374-67999507	Unclassified_Cell_type_specific	NA
cg05064489	-0.00933316	0.00391622	0.0178394	62	455	-0.0193417	0.00271707	1.55666e-12	1840	-0.0136393	0.00280556	1.27145e-06	68	0.00324767	2.67256e-05	-0.0153033	0.00183969	-8.31841	8.91475e-17	0.0909154	0.00324767	2.67256e-05	5.84008e-14	37	10	102279954	10	102269944	F			NA	NA	SEC31B	NM_015490	TSS1500	chr10:102279162-102279730	S_Shore			TRUE				NA
cg17693604	-0.0175675	0.00768118	0.022948	62	455	-0.0325394	0.00517882	4.13092e-10	1840	-0.0271623	0.00450776	2.05709e-09	68	0.00521811	1.93589e-07	-0.0275786	0.00331569	-8.31759	8.97666e-17	0.26947	0.00521811	1.93589e-07	5.87201e-14	37	19	3046805	19	2997805	F			NA	NA	TLE2	NM_001144761	5'UTR	chr19:3047224-3047444	N_Shore			NA		19:3046655-3048081	Unclassified_Cell_type_specific	NA
cg21436544	-0.017599	0.0057006	0.00222602	62	455	-0.0233765	0.00335898	4.73397e-12	1840	-0.0150066	0.00347681	1.67816e-05	68	0.0040247	0.000192527	-0.0195424	0.0023496	-8.31733	8.99698e-17	0.260634	0.0040247	0.000192527	5.87669e-14	37	1	95249289	1	95021877	R			NA	NA								TRUE				TRUE
cg03509898	-0.0166957	0.00505647	0.00108705	62	455	-0.022574	0.00359101	4.05114e-10	1840	-0.0169098	0.0032459	2.12124e-07	68	0.0037574	6.78223e-06	-0.0192079	0.00230946	-8.31705	9.01783e-17	0.472467	0.0037574	6.78223e-06	5.88169e-14	37	14	104190750	14	103260503	R			NA	NA	ZFYVE21	NM_024071	Body	chr14:104193901-104194627	N_Shelf			TRUE	14:103260376-103260683	14:104190262-104191015	Unclassified_Cell_type_specific	TRUE
cg06647928	-0.0134842	0.00633503	0.0341803	62	455	-0.0286036	0.00437604	8.13673e-11	1840	-0.0205044	0.0034678	4.05092e-09	68	0.00401427	3.25795e-07	-0.0222862	0.00268034	-8.31469	9.19935e-17	0.121751	0.00401427	3.25795e-07	5.99133e-14	37	5	73612203	5	73647959	F		rs34895652	NA	NA								TRUE				TRUE
cg02325250	-0.0186118	0.00679304	0.00654757	62	455	-0.0367803	0.00520158	2.17624e-12	1840	-0.0204784	0.00411928	7.31362e-07	68	0.00476841	1.75008e-05	-0.0259561	0.0031218	-8.31447	9.21642e-17	0.0330603	0.00476841	1.75008e-05	5.9937e-14	37	5	131409289	5	131437188	F	rs77296537		NA	NA	CSF2	NM_000758	TSS200					TRUE				TRUE
cg16568360	-0.00615752	0.0054247	0.257323	62	455	-0.0247421	0.00357718	6.35748e-12	1840	-0.016975	0.00275123	8.50566e-10	68	0.00318478	9.81955e-08	-0.018111	0.00217844	-8.31377	9.27054e-17	0.0148529	0.00318478	9.81955e-08	6.02012e-14	37	16	29987261	16	29894762	F			NA	NA	TAOK2;TAOK2	NM_004783;NM_016151	5'UTR;5'UTR	chr16:29984664-29985459	S_Shore			TRUE		16:29987249-29987337	Unclassified_Cell_type_specific	NA
cg13442969	-0.0149485	0.00599056	0.013168	62	455	-0.0381147	0.00512563	1.58135e-13	1840	-0.019966	0.00405675	9.40529e-07	68	0.00469603	2.12176e-05	-0.0249176	0.0029978	-8.31196	9.41317e-17	0.00522025	0.00469603	2.12176e-05	6.10386e-14	37	12	68044208	12	66330475	F			NA	NA	DYRK2;DYRK2	NM_006482;NM_003583	Body;5'UTR	chr12:68042166-68043876	S_Shore			NA		12:68043548-68044723	Promoter_Associated	NA
cg25947970	-0.0211713	0.00680409	0.00205621	62	455	-0.0343355	0.0051459	3.31957e-11	1840	-0.0206135	0.00405269	4.05012e-07	68	0.00469133	1.11305e-05	-0.025673	0.00308899	-8.31113	9.47962e-17	0.108904	0.00469133	1.11305e-05	6.13802e-14	37	3	186220484	3	187703178	F	rs1868151		NA	NA								TRUE				NA
cg25608626	-0.0195744	0.0068801	0.00477261	62	455	-0.0273063	0.00502478	6.23332e-08	1840	-0.023594	0.00358874	6.46472e-11	68	0.00415427	1.35125e-08	-0.0241174	0.0029028	-8.30831	9.70771e-17	0.652256	0.00415427	1.35125e-08	6.27349e-14	37	11	117362843	11	116868053	F			NA	NA	DSCAML1	NM_020693	Body					TRUE				NA
cg23635560	-0.00999724	0.00593747	0.0933598	62	455	-0.0264662	0.00414261	2.11302e-10	1840	-0.0216889	0.00338911	2.0056e-10	68	0.00392317	3.23139e-08	-0.0213376	0.00256825	-8.30819	9.71697e-17	0.0746969	0.00392317	3.23139e-08	6.27349e-14	37	2	27473369	2	27326873	F			NA	NA								TRUE		2:27472852-27473970	Unclassified	TRUE
cg06439889	-0.0115865	0.0052125	0.0270372	62	455	-0.0282038	0.00370458	4.24532e-14	1840	-0.015988	0.00362744	1.11058e-05	68	0.00419907	0.000140378	-0.0203641	0.00245156	-8.30657	9.85083e-17	0.0149943	0.00419907	0.000140378	6.35073e-14	37	6	72077399	6	72134120	R			TRUE	NA								TRUE				NA
cg09147140	-0.0208902	0.00654515	0.00157783	62	455	-0.0328394	0.00503312	8.78434e-11	1840	-0.0335361	0.00670856	6.35227e-07	68	0.00776572	1.57107e-05	-0.0294719	0.00354886	-8.30463	1.00129e-16	0.29513	0.00776572	1.57107e-05	6.44592e-14	37	8	1924394	8	1911801	R			NA	NA	KBTBD11	NM_014867	5'UTR	chr8:1921559-1922872	S_Shore			NA				TRUE
cg13389211	-0.00690473	0.00331477	0.0381699	62	455	-0.011359	0.00204171	3.03274e-08	1840	-0.0140019	0.00199499	3.21876e-12	68	0.00230937	1.33536e-09	-0.0115329	0.00138888	-8.30376	1.00866e-16	0.212277	0.00230937	1.33536e-09	6.48395e-14	37	17	78027740	17	75642335	R			NA	NA	CCDC40	NM_017950	Body					TRUE				NA
cg19474833	-0.0130101	0.00619671	0.0366792	62	455	-0.0232554	0.00508042	5.02165e-06	1840	-0.0215588	0.00276248	1.03444e-14	68	0.0031978	1.56491e-11	-0.0205937	0.00248011	-8.30355	1.01045e-16	0.39391	0.0031978	1.56491e-11	6.48615e-14	37	17	46622899	17	43977898	F			NA	NA	HOXB2	NM_002145	TSS1500	chr17:46620367-46621373	S_Shore		RDMR	NA				NA
cg23272544	-0.0142724	0.00708261	0.04486	62	455	-0.0185484	0.00301722	9.62699e-10	1840	-0.0216344	0.00353619	1.17167e-09	68	0.00409344	1.25609e-07	-0.0190706	0.00229742	-8.30086	1.03357e-16	0.643658	0.00409344	1.25609e-07	6.62504e-14	37	21	45705429	21	44529857	F	rs76089797		NA	NA	AIRE	NM_000383	TSS1500	chr21:45705428-45706044	Island			NA				TRUE
cg09772299	-0.0166573	0.00843142	0.0491934	62	455	-0.0361946	0.00541624	3.10102e-11	1840	-0.0239772	0.00413463	7.92171e-09	68	0.00478617	5.45216e-07	-0.0273919	0.00330033	-8.29975	1.04328e-16	0.0920248	0.00478617	5.45216e-07	6.67765e-14	37	2	136783103	2	136499573	F			NA	NA								TRUE	2:136499463-136499849			NA
cg20372666	-0.0255786	0.00595198	2.39704e-05	62	455	-0.0311394	0.00539801	9.35228e-09	1840	-0.0238014	0.00483772	9.48664e-07	68	0.00560006	2.1358e-05	-0.0269994	0.00325414	-8.29693	1.06839e-16	0.61529	0.00560006	2.1358e-05	6.82857e-14	37	10	71149910	10	70819916	R			NA	NA	HK1;HK1;HK1;HK1;HK1	NM_033500;NM_000188;NM_033498;NM_033497;NM_033496	Body;Body;Body;Body;Body					TRUE				TRUE
cg11409350	-0.0124698	0.00538375	0.0212801	62	455	-0.0180238	0.00263644	1.10078e-11	1840	-0.0185067	0.00380308	1.24188e-06	68	0.00440238	2.62486e-05	-0.0172989	0.0020853	-8.29565	1.07997e-16	0.620203	0.00440238	2.62486e-05	6.8927e-14	37	17	73126499	17	70638094	F			NA	NA	NT5C	NM_014595	3'UTR	chr17:73127196-73127995	N_Shore			NA	17:70638074-70638601	17:73126076-73128779	Promoter_Associated	NA
cg05437692	-0.0167192	0.00647367	0.0103199	62	455	-0.0231755	0.00394655	5.08621e-09	1840	-0.0263588	0.00422328	5.45762e-10	68	0.0048888	6.9808e-08	-0.0230149	0.0027745	-8.29514	1.08454e-16	0.492806	0.0048888	6.9808e-08	6.91199e-14	37	4	149362435	4	149581885	R			NA	NA	NR3C2;NR3C2	NM_000901;NM_001166104	5'UTR;5'UTR	chr4:149363212-149367056	N_Shore			NA				NA
cg13247990	-0.010544	0.00426227	0.0139703	62	455	-0.0206244	0.00291597	2.14715e-12	1840	-0.0130201	0.00267288	1.21153e-06	68	0.00309408	2.57561e-05	-0.0157556	0.00189966	-8.29391	1.09582e-16	0.0794763	0.00309408	2.57561e-05	6.97396e-14	37	16	46782176	16	45339677	F			NA	TRUE	MYLK3;MYLK3	NM_182493;NM_182493	5'UTR;1stExon					TRUE				NA
cg20638525	-0.023403	0.00659754	0.000457293	62	455	-0.0304183	0.00438764	5.69251e-12	1840	-0.0170688	0.00420755	5.20058e-05	68	0.00487059	0.000457531	-0.0242349	0.00292263	-8.29216	1.1121e-16	0.124513	0.00487059	0.000457531	7.06743e-14	37	11	45043197	11	44999773	F			NA	NA								TRUE				NA
cg00501876	-0.0188317	0.00595506	0.00173992	62	455	-0.033349	0.00456669	4.1807e-13	1840	-0.015052	0.00335084	7.5269e-06	68	0.00387887	0.000104238	-0.0219513	0.00264801	-8.28975	1.13484e-16	0.00795736	0.00387887	0.000104238	7.20173e-14	37	3	39193251	3	39168255	R			NA	NA	CSRNP1	NM_033027	5'UTR	chr3:39194241-39195359	N_Shore			NA				TRUE
cg19216211	-0.0205171	0.00807701	0.011628	62	455	-0.0290714	0.00543649	1.00321e-07	1840	-0.0305012	0.00446756	1.19759e-11	68	0.00517157	3.68258e-09	-0.0281741	0.00339906	-8.2888	1.14398e-16	0.568806	0.00517157	3.68258e-09	7.24942e-14	37	8	22455986	8	22511931	F			NA	NA	C8orf58	NM_001013842	TSS1500	chr8:22456091-22456508	N_Shore			NA				NA
cg23829395	-0.0311054	0.00694264	1.09266e-05	62	455	-0.0249314	0.00492105	4.46336e-07	1840	-0.0252074	0.00448901	2.2845e-08	68	0.00519641	1.22889e-06	-0.0263274	0.00317702	-8.28682	1.16312e-16	0.740609	0.00519641	1.22889e-06	7.36025e-14	37	12	46796953	12	45083220	R			NA	NA								TRUE				NA
cg07201319	-0.0101522	0.00734805	0.168208	62	455	-0.0468913	0.00657342	1.40144e-12	1840	-0.0290284	0.00459546	3.3964e-10	68	0.00531963	4.84673e-08	-0.0298569	0.00360373	-8.28502	1.18089e-16	0.000944012	0.00531963	4.84673e-08	7.46209e-14	37	6	139909641	6	139951334	R			NA	NA								TRUE				NA
cg21534578	-0.01769	0.00523931	0.000839963	62	455	-0.0229452	0.00380353	1.94582e-09	1840	-0.0198361	0.00369031	8.70137e-08	68	0.00427184	3.42633e-06	-0.0206888	0.00249726	-8.2846	1.18509e-16	0.697896	0.00427184	3.42633e-06	7.47806e-14	37	1	197745159	1	196011782	R			NA	NA	DENND1B;DENND1B	NM_144977;NM_001142795	TSS1500;TSS1500	chr1:197743931-197744788	S_Shore			TRUE		1:197745048-197745377	Promoter_Associated	NA
cg22851561	-0.019835	0.00703409	0.00515295	62	455	-0.0396473	0.00582186	1.31636e-11	1840	-0.0269528	0.00528925	3.85712e-07	68	0.00612275	1.0722e-05	-0.0299726	0.00361812	-8.28403	1.19079e-16	0.0787916	0.00612275	1.0722e-05	7.5034e-14	37	14	74214183	14	73283936	F			NA	NA	C14orf43;C14orf43	NM_001043318;NM_194278	5'UTR;5'UTR					TRUE				NA
cg13989852	-0.0192476	0.00796426	0.0163088	62	455	-0.0389182	0.0054482	1.3071e-12	1840	-0.0279846	0.00600376	3.38731e-06	68	0.00694985	5.65791e-05	-0.0312714	0.00377537	-8.28303	1.20084e-16	0.106839	0.00694985	5.65791e-05	7.55607e-14	37	15	68260324	15	66047378	F			NA	NA				chr15:68260501-68260710	N_Shore			TRUE	15:66047362-66047727			NA
cg12829455	-0.0224098	0.00522911	2.52043e-05	62	455	-0.0215589	0.00380208	1.6519e-08	1840	-0.0207393	0.00420793	9.08156e-07	68	0.00487103	2.06562e-05	-0.0215358	0.00260031	-8.28201	1.21114e-16	0.973013	0.00487103	2.06562e-05	7.61012e-14	37	3	51391213	3	51366253	R			NA	NA	DOCK3	NM_004947	Body					TRUE				NA
cg19542445	-0.0211588	0.00703556	0.00287777	62	455	-0.0287025	0.00470799	1.31724e-09	1840	-0.0231448	0.00413106	2.45546e-08	68	0.00478205	1.29883e-06	-0.0250762	0.00302825	-8.28076	1.2239e-16	0.586712	0.00478205	1.29883e-06	7.67776e-14	37	12	2596220	12	2466481	R			NA	NA	CACNA1C;CACNA1C;CACNA1C;CACNA1C;CACNA1C;CACNA1C;CACNA1C;CACNA1C;CACNA1C;CACNA1C;CACNA1C;CACNA1C;CACNA1C;CACNA1C;CACNA1C;CACNA1C;CACNA1C;CACNA1C;CACNA1C;CACNA1C;CACNA1C;CACNA1C;CACNA1C	NM_001129844;NM_001129827;NM_001129839;NM_001129834;NM_001129841;NM_000719;NM_001129830;NM_001167625;NM_001129843;NM_001167624;NM_001129835;NM_001129837;NM_001167623;NM_001129840;NM_199460;NM_001129833;NM_001129832;NM_001129829;NM_001129846;NM_001129836;NM_001129838;NM_001129831;NM_001129842	Body;Body;Body;Body;Body;Body;Body;Body;Body;Body;Body;Body;Body;Body;Body;Body;Body;Body;Body;Body;Body;Body;Body					TRUE				NA
cg23058673	-0.0234093	0.00474225	1.37945e-06	62	455	-0.021271	0.00354668	2.4071e-09	1840	-0.0132437	0.00334214	7.71721e-05	68	0.00386881	0.000618907	-0.0189582	0.00228949	-8.28052	1.22637e-16	0.17482	0.00386881	0.000618907	7.67776e-14	37	7	5422234	7	5388760	R			NA	NA	TNRC18	NM_001080495	Body					TRUE				TRUE
cg09728393	-0.0166455	0.00606849	0.00648763	62	455	-0.0327737	0.00467461	3.30974e-12	1840	-0.0183407	0.00367861	6.79618e-07	68	0.0042583	1.65447e-05	-0.0231387	0.00279438	-8.28045	1.22706e-16	0.0357452	0.0042583	1.65447e-05	7.67776e-14	37	6	17851756	6	17959735	F			NA	NA	KIF13A;KIF13A;KIF13A;KIF13A	NM_022113;NM_001105567;NM_001105568;NM_001105566	Body;Body;Body;Body					TRUE				NA
cg11985480	-0.043634	0.0142724	0.0024531	62	455	-0.0530028	0.00891124	3.24383e-09	1840	-0.0590001	0.0102971	1.18566e-08	68	0.0119198	7.42997e-07	-0.0528487	0.00638353	-8.27891	1.24305e-16	0.710538	0.0119198	7.42997e-07	7.76687e-14	37	2	74729100	2	74582608	F	rs17722476		NA	NA	LOC151534;LBX2	NR_024606;NM_001009812	TSS1500;Body	chr2:74729399-74731166	N_Shore		RDMR	NA	2:74582608-74584778	2:74728052-74729181	Unclassified_Cell_type_specific	NA
cg10922280	-0.0186154	0.004944	0.000203322	62	455	-0.023924	0.00377066	2.79691e-10	1840	-0.0156951	0.00334414	2.90178e-06	68	0.00387112	5.02611e-05	-0.0196184	0.00237039	-8.27645	1.26904e-16	0.305415	0.00387112	5.02611e-05	7.91816e-14	37	16	68034227	16	66591728	R			NA	TRUE	DPEP2	NM_022355	TSS1500					TRUE				NA
cg06669752	-0.0357147	0.0101538	0.000509454	62	455	-0.040749	0.00741729	4.48238e-08	1840	-0.0439982	0.00741355	3.55202e-09	68	0.0085818	2.94516e-07	-0.0406354	0.00491153	-8.27346	1.30124e-16	0.823396	0.0085818	2.94516e-07	8.10775e-14	37	5	138534431	5	138562330	R			NA	NA	SIL1;SIL1	NM_001037633;NM_022464	TSS1500;TSS1500	chr5:138533870-138534113	S_Shore			NA		5:138533001-138534582	Promoter_Associated	NA
cg17415650	-0.0218645	0.00546909	8.21109e-05	62	455	-0.0231788	0.00407371	1.47637e-08	1840	-0.0182898	0.00346049	1.4158e-07	68	0.00400581	4.97558e-06	-0.0209442	0.00253177	-8.27257	1.31102e-16	0.681026	0.00400581	4.97558e-06	8.15728e-14	37	12	113370524	12	111854907	R			NA	NA								TRUE				NA
cg25841008	-0.0434285	0.00886164	1.63043e-06	62	455	-0.0326239	0.00582847	2.50434e-08	1840	-0.0305666	0.0069496	1.15802e-05	68	0.00804474	0.000144944	-0.03446	0.00416585	-8.27202	1.31707e-16	0.507195	0.00804474	0.000144944	8.18355e-14	37	4	99534176	4	99753199	R			NA	NA	TSPAN5	NM_005723	Body					TRUE				NA
cg14244402	-0.0216183	0.0073304	0.00345958	62	455	-0.0280328	0.00563407	7.111e-07	1840	-0.0405932	0.00561355	7.18041e-13	68	0.00649816	4.1872e-10	-0.030446	0.00368117	-8.27075	1.33115e-16	0.13054	0.00649816	4.1872e-10	8.25951e-14	37	9	130681102	9	129720923	F			NA	NA				chr9:130679120-130679612	S_Shore			TRUE		9:130680554-130681203	Unclassified	NA
cg17330252	-0.0248218	0.00644193	0.000145063	62	455	-0.0262048	0.00519124	4.90838e-07	1840	-0.0311988	0.00503345	7.13566e-10	68	0.00582664	8.57915e-08	-0.0274598	0.00332118	-8.26806	1.36156e-16	0.726904	0.00582664	8.57915e-08	8.43646e-14	37	12	69809627	12	68095894	F			NA	NA								TRUE		12:69808606-69810501	Unclassified	TRUE
cg25840433	-0.0117044	0.00554685	0.0357492	62	455	-0.024448	0.00347654	2.85344e-12	1840	-0.0185457	0.00373234	7.40435e-07	68	0.00432049	1.76668e-05	-0.0201214	0.00243388	-8.26721	1.37133e-16	0.136394	0.00432049	1.76668e-05	8.48217e-14	37	6	167104903	6	167024893	R			NA	NA	RPS6KA2	NM_001006932	Body					NA	6:167024893-167024933			TRUE
cg15038286	-0.0441603	0.0103626	2.78933e-05	62	455	-0.0364173	0.0065712	3.42329e-08	1840	-0.0379313	0.00735024	2.74863e-07	68	0.00850852	8.27124e-06	-0.038427	0.00464819	-8.26709	1.37274e-16	0.817488	0.00850852	8.27124e-06	8.48217e-14	37	3	128200723	3	129683413	R			NA	NA	GATA2;GATA2;GATA2	NM_001145661;NM_032638;NM_001145662	Body;Body;Body					TRUE	3:129683381-129683496	3:128200624-128200928	Gene_Associated_Cell_type_specific	TRUE
cg14377059	-0.0143374	0.00627963	0.0231816	62	455	-0.0265422	0.00454453	6.14014e-09	1840	-0.0268437	0.00409872	7.62143e-11	68	0.00474461	1.53394e-08	-0.0240371	0.00290864	-8.26403	1.40835e-16	0.218747	0.00474461	1.53394e-08	8.69016e-14	37	1	59183881	1	58956469	R			NA	NA								TRUE		1:59183802-59184148	Unclassified_Cell_type_specific	NA
cg08298946	-0.0163411	0.00629165	0.00990084	62	455	-0.0332618	0.0043948	5.93553e-14	1840	-0.020604	0.00562114	0.000254421	68	0.00650694	0.00154299	-0.026045	0.00315196	-8.26312	1.41915e-16	0.0557267	0.00650694	0.00154299	8.74473e-14	37	12	13301010	12	13192277	R			NA	NA								TRUE				NA
cg19623054	-0.0422016	0.0146073	0.00417007	62	455	-0.0602717	0.00864802	4.41742e-12	1840	-0.0391602	0.0090429	1.57393e-05	68	0.0104679	0.000183308	-0.0500689	0.00606521	-8.2551	1.51778e-16	0.250577	0.0104679	0.000183308	9.33958e-14	37	2	16085728	2	16003179	F			NA	NA	MYCN	NM_005378	Body	chr2:16079801-16083032	S_Shelf			NA	2:16003179-16003527			NA
cg07722360	-0.036433	0.0106905	0.000752002	62	455	-0.0364536	0.00662803	4.33163e-08	1840	-0.0410318	0.00689337	3.19875e-09	68	0.00797966	2.71748e-07	-0.0379725	0.004602	-8.2513	1.56681e-16	0.895725	0.00797966	2.71748e-07	9.62802e-14	37	20	17691454	20	17639454	F			NA	NA	BANF2;BANF2;BANF2	NM_001014977;NM_178477;NM_001159495	5'UTR;5'UTR;Body					TRUE				NA
cg21791252	-0.0277079	0.00876215	0.00174031	62	455	-0.0352947	0.00559836	3.61116e-10	1840	-0.0291556	0.00576652	4.73945e-07	68	0.00667523	1.25542e-05	-0.0317831	0.0038526	-8.24976	1.58717e-16	0.682258	0.00667523	1.25542e-05	9.7397e-14	37	6	33864756	6	33972734	F			NA	NA								TRUE		6:33864624-33864771	Unclassified_Cell_type_specific	TRUE
cg16326402	-0.00858074	0.00410638	0.0375682	62	455	-0.0240274	0.00335291	1.1117e-12	1840	-0.018274	0.003473	1.60666e-07	68	0.00402029	5.48185e-06	-0.0179739	0.00218152	-8.23914	1.73447e-16	0.0142808	0.00402029	5.48185e-06	1.0629e-13	37	2	158698856	2	158407102	R			NA	NA	ACVR1;ACVR1	NM_001105;NM_001111067	5'UTR;5'UTR					TRUE				NA
cg16665506	-0.00323144	0.00187879	0.0865611	62	455	-0.00521253	0.00065717	3.71634e-15	1840	-0.00429217	0.00212484	0.0435393	68	0.00245968	0.0809832	-0.00495444	0.000601484	-8.23703	1.76535e-16	0.586322	0.00245968	0.0809832	1.07924e-13	37	3	129326828	3	130809518	F			NA	NA	PLXND1	NM_015103	TSS1500	chr3:129323915-129325332	S_Shore			NA		3:129326446-129326914	Unclassified_Cell_type_specific	NA
cg05308645	-0.0102162	0.00662562	0.12424	62	455	-0.0303272	0.00429739	2.3985e-12	1840	-0.0260365	0.00477193	5.57564e-08	68	0.00552391	2.43592e-06	-0.0248693	0.00301922	-8.23699	1.76597e-16	0.03784	0.00552391	2.43592e-06	1.07924e-13	37	3	184107534	3	185590228	R			NA	NA	CHRD	NM_003741	3'UTR	chr3:184104308-184104519	S_Shelf			NA				NA
cg13686739	-0.00901464	0.00450062	0.0461575	62	455	-0.0203905	0.00324614	4.17599e-10	1840	-0.0169246	0.0027359	7.69671e-10	68	0.00316704	9.09327e-08	-0.0166721	0.00202457	-8.23487	1.7975e-16	0.121645	0.00316704	9.09327e-08	1.097e-13	37	17	48211226	17	45566225	R			NA	NA	PPP1R9B	NM_032595	3'UTR	chr17:48206663-48207601	S_Shelf			TRUE				NA
cg07954706	-0.0223885	0.00571769	0.000113681	62	455	-0.0240211	0.00418693	1.12326e-08	1840	-0.0187477	0.00358996	1.98317e-07	68	0.00415567	6.44139e-06	-0.0215799	0.00262127	-8.23258	1.83225e-16	0.662184	0.00415567	6.44139e-06	1.11669e-13	37	1	110164547	1	109966070	F			NA	NA	AMPD2;AMPD2	NM_139156;NM_004037	Body;Body	chr1:110162464-110162716	S_Shore			NA		1:110164456-110164548	Promoter_Associated_Cell_type_specific	NA
cg12687767	-0.0193299	0.00603848	0.00152893	62	455	-0.0246974	0.00431734	1.23695e-08	1840	-0.0207359	0.00354908	6.13764e-09	68	0.00410836	4.48227e-07	-0.0219757	0.00266955	-8.232	1.84118e-16	0.711602	0.00410836	4.48227e-07	1.1206e-13	37	20	19870109	20	19818109	F			NA	NA	RIN2	NM_018993	TSS200			low-CpG:19817823-19818220		NA		20:19869807-19870556	Unclassified_Cell_type_specific	TRUE
cg03172991	-0.0152154	0.00456509	0.000976585	62	455	-0.018902	0.00376183	5.53124e-07	1840	-0.0158715	0.00243042	8.62408e-11	68	0.00281342	1.68716e-08	-0.0166171	0.00202036	-8.22483	1.95469e-16	0.765886	0.00281342	1.68716e-08	1.18806e-13	37	19	13105728	19	12966728	F			NA	TRUE	NFIX	NM_002501	TSS1500	chr19:13106817-13107688	N_Shore			NA		19:13105722-13107411	Promoter_Associated_Cell_type_specific	NA
cg04728789	-0.0139652	0.00406238	0.000677184	62	455	-0.0139364	0.00278282	6.02587e-07	1840	-0.0147481	0.00229924	1.82495e-10	68	0.00266156	3.00494e-08	-0.014288	0.00173843	-8.21888	2.05412e-16	0.974254	0.00266156	3.00494e-08	1.24679e-13	37	22	38711154	22	37041100	F			NA	NA	CSNK1E;CSNK1E	NM_001894;NM_152221	5'UTR;5'UTR	chr22:38712684-38713333	N_Shore		RDMR	TRUE				NA
cg08632420	-0.0298804	0.0104697	0.00464472	62	455	-0.0438205	0.00716185	1.15058e-09	1840	-0.0420357	0.00755634	3.0721e-08	68	0.0087471	1.54234e-06	-0.0402104	0.00489768	-8.2101	2.21005e-16	0.52964	0.0087471	1.54234e-06	1.33962e-13	37	16	19117471	16	19024972	F			NA	NA								TRUE				NA
cg18569661	-0.0189438	0.00652719	0.00400324	62	455	-0.0255876	0.00463456	3.84931e-08	1840	-0.0248484	0.00396996	4.88229e-10	68	0.00459556	6.40757e-08	-0.0239609	0.0029188	-8.20914	2.22785e-16	0.686843	0.00459556	6.40757e-08	1.34858e-13	37	12	678853	12	549114	F	rs60905768		NA	NA	NINJ2	NM_016533	Body	chr12:678959-679299	N_Shore			NA		12:678572-680056	Promoter_Associated	NA
cg04486013	-0.0212524	0.00556874	0.000167202	62	455	-0.0200319	0.00406157	8.86836e-07	1840	-0.0189784	0.00306836	7.73927e-10	68	0.00355188	9.13191e-08	-0.0197754	0.00241029	-8.20458	2.31395e-16	0.939559	0.00355188	9.13191e-08	1.39879e-13	37	1	46035287	1	45807874	F			NA	NA	AKR1A1;AKR1A1	NM_006066;NM_153326	Body;Body					NA		1:46035222-46036808	Gene_Associated	NA
cg02727423	-0.00729201	0.00687741	0.289942	62	455	-0.0294494	0.0044139	3.32894e-11	1840	-0.0232314	0.00373116	5.99273e-10	68	0.00431913	7.50147e-08	-0.0230899	0.00281634	-8.19857	2.43264e-16	0.0253054	0.00431913	7.50147e-08	1.46855e-13	37	14	100258973	14	99328726	F	rs59446534		NA	TRUE	EML1;EML1	NM_004434;NM_001008707	TSS1500;TSS1500	chr14:100259160-100259542	N_Shore			TRUE		14:100258851-100260555	Unclassified	NA
cg13463639	-0.0240915	0.00729663	0.00108749	62	455	-0.0272094	0.00446359	1.32296e-09	1840	-0.0189227	0.00357194	1.32528e-07	68	0.00413482	4.72996e-06	-0.0229474	0.00280095	-8.19272	2.55378e-16	0.389901	0.00413482	4.72996e-06	1.5396e-13	37	11	417907	11	407907	F			NA	NA	SIGIRR;SIGIRR	NM_001135053;NM_021805	TSS1500;TSS1500	chr11:416419-417650	S_Shore			NA				NA
cg11915444	-0.0213827	0.00698213	0.00241171	62	455	-0.0366451	0.00570475	1.68988e-10	1840	-0.0258677	0.00503529	3.10594e-07	68	0.00582878	9.08294e-06	-0.0288323	0.00352073	-8.18927	2.62805e-16	0.194692	0.00582878	9.08294e-06	1.58224e-13	37	2	12237012	2	12154463	R			NA	NA								TRUE				NA
cg12212103	-0.0153142	0.00515613	0.00323884	62	455	-0.0270742	0.00448234	1.85793e-09	1840	-0.0184037	0.00316489	7.22065e-09	68	0.00366363	5.07782e-07	-0.0203516	0.00248536	-8.18859	2.64301e-16	0.174944	0.00366363	5.07782e-07	1.58762e-13	37	17	48231729	17	45586728	F			NA	NA				chr17:48226223-48228625	S_Shelf			TRUE				NA
cg04951819	-0.0216004	0.00756175	0.00460855	62	455	-0.030675	0.00522243	5.04575e-09	1840	-0.0323075	0.00550323	5.20214e-09	68	0.00637045	3.94782e-07	-0.0291714	0.00356247	-8.18854	2.64411e-16	0.514869	0.00637045	3.94782e-07	1.58762e-13	37	12	551573	12	421834	F			NA	NA	CCDC77;CCDC77;CCDC77;CCDC77	NM_001130148;NM_032358;NM_001130147;NM_001130146	3'UTR;3'UTR;3'UTR;3'UTR					NA		12:551017-552394	Gene_Associated	TRUE
cg11980800	-0.061465	0.0107433	2.74883e-08	62	455	-0.0355569	0.00825923	1.75682e-05	1840	-0.0403504	0.00787608	3.34401e-07	68	0.00911722	9.61154e-06	-0.0435373	0.0053184	-8.18617	2.69681e-16	0.146572	0.00911722	9.61154e-06	1.61709e-13	37	1	9748107	1	9670694	F			NA	NA	PIK3CD	NM_005026	5'UTR	chr1:9749295-9750228	N_Shore			NA	1:9669838-9670928	1:9746710-9748190	Promoter_Associated	TRUE
cg00839844	-0.0111523	0.00430772	0.0101387	62	455	-0.0182743	0.00317196	9.76968e-09	1840	-0.0157595	0.00253535	6.39543e-10	68	0.00293488	7.88621e-08	-0.0157657	0.00192673	-8.18261	2.77765e-16	0.412212	0.00293488	7.88621e-08	1.66333e-13	37	18	46474644	18	44728642	R			NA	NA	SMAD7	NM_005904	Body	chr18:46474931-46479364	N_Shore		RDMR	NA				NA
cg24110540	-0.0276166	0.00866984	0.00161156	62	455	-0.0301501	0.00551608	5.23547e-08	1840	-0.040243	0.0065146	8.12506e-10	68	0.0075412	9.47994e-08	-0.0324052	0.00396048	-8.18212	2.78897e-16	0.460147	0.0075412	9.47994e-08	1.66787e-13	37	7	37274621	7	37241146	R			NA	NA	ELMO1	NM_014800	Body					TRUE		7:37274447-37274903	Unclassified_Cell_type_specific	NA
cg17560136	-0.0112394	0.00609793	0.0663793	62	455	-0.0362112	0.00545297	4.09885e-11	1840	-0.0358804	0.00559085	1.78604e-10	68	0.00647187	2.95549e-08	-0.0281606	0.00344218	-8.18102	2.81443e-16	0.00351294	0.00647187	2.95549e-08	1.68084e-13	37	8	21915510	8	21971456	R			NA	NA	EPB49;EPB49;EPB49;EPB49;EPB49;EPB49	NM_001114135;NM_001978;NM_001114136;NM_001114139;NM_001114138;NM_001114137	5'UTR;TSS1500;5'UTR;5'UTR;TSS1500;5'UTR	chr8:21914275-21914525	S_Shore			NA		8:21915070-21915574	Unclassified_Cell_type_specific	NA
cg09982773	-0.0147977	0.0100903	0.143644	62	455	-0.0256549	0.00370228	5.82082e-12	1840	-0.0182517	0.00361481	4.91049e-07	68	0.00418444	1.28997e-05	-0.0218702	0.00267367	-8.17983	2.84249e-16	0.319163	0.00418444	1.28997e-05	1.69533e-13	37	7	128550860	7	128338096	F	rs1609545		NA	NA	KCP;KCP	NM_001135914;NM_199349	TSS200;TSS200	chr7:128550409-128550903	Island			NA	7:128337496-128338139	7:128550741-128551016	Unclassified_Cell_type_specific	TRUE
cg24694246	-0.0122456	0.00579876	0.0356059	62	455	-0.0123181	0.00222195	3.38727e-08	1840	-0.0257976	0.00350466	2.82152e-13	68	0.00405694	2.03219e-10	-0.0151055	0.00184727	-8.17717	2.90581e-16	0.0125071	0.00405694	2.03219e-10	1.73078e-13	37	14	34529059	14	33598810	R			NA	NA				chr14:34529120-34529959	N_Shore			TRUE		14:34529026-34530004	Promoter_Associated	NA
cg06466839	-0.017567	0.0061194	0.0044127	62	455	-0.0275418	0.00417161	5.28447e-11	1840	-0.0201361	0.00417574	1.5458e-06	68	0.00483377	3.10373e-05	-0.0229475	0.00280644	-8.17673	2.91661e-16	0.312822	0.00483377	3.10373e-05	1.73489e-13	37	11	129062277	11	128567487	R			NA	NA	RICS	NM_001142685	TSS200					NA				NA
cg26861732	-0.0365657	0.0140089	0.00954354	62	455	-0.0561206	0.00842279	3.53458e-11	1840	-0.0505419	0.0105716	1.89435e-06	68	0.0122375	3.62642e-05	-0.0508287	0.00621744	-8.17518	2.95415e-16	0.488727	0.0122375	3.62642e-05	1.75489e-13	37	20	21372126	20	21320126	R			NA	NA				chr20:21372041-21372463	Island			TRUE	20:21320067-21320481			NA
cg16772022	-0.0257033	0.0068921	0.000232943	62	455	-0.0242957	0.0044304	4.73721e-08	1840	-0.028504	0.0051169	2.94321e-08	68	0.00592324	1.49246e-06	-0.025784	0.00315438	-8.17403	2.98258e-16	0.850495	0.00592324	1.49246e-06	1.76942e-13	37	X	153211711	X	152864905	F			NA	NA	RENBP	NM_002910	TSS1500					NA				NA
cg13499923	-0.0239213	0.00828964	0.00421394	62	455	-0.0428935	0.00640249	2.77052e-11	1840	-0.0307027	0.00639891	1.74074e-06	68	0.00740727	3.39913e-05	-0.0341783	0.0041822	-8.17233	3.02485e-16	0.164963	0.00740727	3.39913e-05	1.79212e-13	37	1	108594260	1	108395783	R			NA	NA								TRUE		1:108593907-108594288	Unclassified_Cell_type_specific	NA
cg19903805	-0.023998	0.00650511	0.000271034	62	455	-0.0262339	0.00434567	1.89686e-09	1840	-0.0187019	0.00378016	8.25979e-07	68	0.00437585	1.92094e-05	-0.0227699	0.0027863	-8.1721	3.03072e-16	0.464105	0.00437585	1.92094e-05	1.79321e-13	37	14	92333771	14	91403524	F		rs74413945	NA	NA	TC2N;TC2N	NM_001128596;NM_001128596	1stExon;5'UTR					NA		14:92333676-92334134	Promoter_Associated_Cell_type_specific	NA
cg20911718	-0.0143972	0.0051264	0.00533362	62	455	-0.0222235	0.00370397	2.37154e-09	1840	-0.0179235	0.00312595	1.15851e-08	68	0.00361855	7.29902e-07	-0.0188804	0.00231056	-8.17138	3.04872e-16	0.438373	0.00361855	7.29902e-07	1.79939e-13	37	14	24867491	14	23937331	R			NA	NA	NYNRIN	NM_025081	TSS1500	chr14:24868163-24868590	N_Shore			NA		14:24867435-24867735	Unclassified_Cell_type_specific	NA
cg01028796	-0.0356729	0.00710869	9.35842e-07	62	455	-0.0182865	0.00522072	0.000471623	1840	-0.0315063	0.00464761	1.65918e-11	68	0.00537999	4.73571e-09	-0.0270838	0.00331447	-8.17136	3.04923e-16	0.0831123	0.00537999	4.73571e-09	1.79939e-13	37	9	95525261	9	94565082	F		rs79087898	NA	NA	BICD2;BICD2	NM_015250;NM_001003800	Body;Body	chr9:95526459-95527825	N_Shore			NA		9:95525053-95525403	Promoter_Associated	NA
cg10921702	-0.00611978	0.00266885	0.022598	62	455	-0.0143074	0.00211186	1.6714e-11	1840	-0.0114534	0.00214416	1.04416e-07	68	0.00248204	3.94015e-06	-0.0112467	0.00137759	-8.16405	3.2397e-16	0.0550877	0.00248204	3.94015e-06	1.90926e-13	37	6	30716324	6	30824303	R			NA	NA				chr6:30710307-30712440	S_Shelf			NA				NA
cg10870160	-0.0146021	0.00556184	0.0091373	62	455	-0.0303504	0.00446306	1.40595e-11	1840	-0.0185689	0.00363788	3.68923e-07	68	0.00421115	1.03627e-05	-0.0219035	0.00268298	-8.16386	3.24486e-16	0.0514968	0.00421115	1.03627e-05	1.90978e-13	37	17	17695459	17	17636184	R			NA	NA	RAI1	NM_030665	5'UTR	chr17:17697710-17698063	N_Shelf			TRUE				NA
cg10377144	-0.0275207	0.00793826	0.000610584	62	455	-0.0264593	0.00659106	6.19833e-05	1840	-0.045716	0.00600191	4.27076e-14	68	0.00694771	4.70429e-11	-0.0334348	0.004096	-8.1628	3.27341e-16	0.0907308	0.00694771	4.70429e-11	1.92404e-13	37	10	89419177	10	89409157	R			NA	NA	PAPSS2;PAPSS2	NM_004670;NM_001015880	TSS1500;TSS1500	chr10:89419346-89420027	N_Shore			NA				NA
cg02082887	-0.0122656	0.00555754	0.0281357	62	455	-0.0293177	0.00481788	1.41222e-09	1840	-0.0238589	0.0037519	2.59572e-10	68	0.00434314	3.94097e-08	-0.0227678	0.00278994	-8.16066	3.33202e-16	0.0644933	0.00434314	3.94097e-08	1.95592e-13	37	17	37820361	17	35073887	R			NA	NA	TCAP;STARD3;STARD3;STARD3	NM_003673;NM_006804;NM_001165938;NM_001165937	TSS1500;3'UTR;3'UTR;3'UTR	chr17:37823693-37824989	N_Shelf			TRUE				NA
cg23850277	-0.0105374	0.00468846	0.0253972	62	455	-0.0176871	0.00350735	5.03738e-07	1840	-0.0186899	0.00260933	1.16964e-12	68	0.00302051	6.10679e-10	-0.0167761	0.00205677	-8.15654	3.44745e-16	0.326355	0.00302051	6.10679e-10	2.02102e-13	37	22	24114770	22	22444770	R			NA	NA	MMP11	NM_005940	TSS1500	chr22:24114875-24115467	N_Shore			NA		22:24114634-24115691	Unclassified	TRUE
cg01687189	-0.0220568	0.00732506	0.00284365	62	455	-0.0357507	0.00609099	5.17478e-09	1840	-0.0389586	0.00659542	4.19509e-09	68	0.00763475	3.34663e-07	-0.0325604	0.00399212	-8.15617	3.45804e-16	0.219503	0.00763475	3.34663e-07	2.02457e-13	37	12	102225365	12	100749496	R			NA	NA	GNPTAB	NM_024312	TSS1500	chr12:102224262-102224614	S_Shore			NA		12:102223977-102225512	Promoter_Associated	NA
cg01720920	-0.0233749	0.00659943	0.000466113	62	455	-0.0261526	0.00414364	3.45396e-10	1840	-0.0189555	0.00417403	5.98121e-06	68	0.00483178	8.74243e-05	-0.023153	0.00283939	-8.15422	3.51432e-16	0.527325	0.00483178	8.74243e-05	2.05482e-13	37	14	104185151	14	103254904	F			NA	NA	ZFYVE21	NM_024071	Body	chr14:104181378-104182952	S_Shelf			NA	14:103254006-103254974			NA
cg20692268	-0.0253721	0.00810935	0.00194355	62	455	-0.027523	0.00516836	1.13159e-07	1840	-0.0275185	0.00447025	9.27646e-10	68	0.00517469	1.04968e-07	-0.0271577	0.00333356	-8.14675	3.73843e-16	0.971251	0.00517469	1.04968e-07	2.183e-13	37	1	25358981	1	25231568	F			NA	NA								TRUE		1:25357957-25359295	Unclassified	NA
cg00351047	-0.0116306	0.005293	0.0288255	62	455	-0.0255889	0.00390438	7.25737e-11	1840	-0.0192456	0.00345784	3.02375e-08	68	0.00400273	1.52369e-06	-0.0201271	0.00247153	-8.14357	3.83799e-16	0.101159	0.00400273	1.52369e-06	2.2382e-13	37	19	15234963	19	15095963	R			NA	NA	ILVBL	NM_006844	Body	chr19:15235912-15236631	N_Shore			NA		19:15234832-15235036	Gene_Associated_Cell_type_specific	NA
cg02149965	-0.0206528	0.00650825	0.00167742	62	455	-0.0293235	0.00420902	4.49771e-12	1840	-0.0140047	0.0030815	5.88407e-06	68	0.00356709	8.63357e-05	-0.0204445	0.00251065	-8.14313	3.85187e-16	0.0211704	0.00356709	8.63357e-05	2.24336e-13	37	6	30883203	6	30991182	F			NA	NA	VARS2;VARS2;VARS2	NM_020442;NM_001167733;NM_001167734	Body;5'UTR;Body	chr6:30881533-30882296	S_Shore			TRUE		6:30883023-30883686	Promoter_Associated	NA
cg09879794	-0.00687271	0.00678154	0.311736	62	455	-0.0337232	0.00453245	1.53251e-13	1840	-0.0210269	0.00393603	1.04152e-07	68	0.00455628	3.9325e-06	-0.023643	0.00290383	-8.14202	3.88737e-16	0.00336065	0.00455628	3.9325e-06	2.26108e-13	37	7	128432231	7	128219467	F			NA	NA	CCDC136;CCDC136	NM_022742;NM_022742	1stExon;5'UTR	chr7:128430707-128432003	S_Shore			NA				NA
cg09371559	-0.0201947	0.00667085	0.00270068	62	455	-0.0238878	0.00364962	7.67736e-11	1840	-0.0137931	0.00275588	6.16125e-07	68	0.00319017	1.53476e-05	-0.0183983	0.00225988	-8.14128	3.91105e-16	0.109766	0.00319017	1.53476e-05	2.2719e-13	37	19	17351300	19	17212300	R			NA	NA	NR2F6	NM_005234	Body	chr19:17355181-17356471	N_Shelf			NA				NA
cg05773108	-0.0202743	0.00664328	0.00249592	62	455	-0.0260938	0.00448864	7.20481e-09	1840	-0.0211299	0.00372863	1.70231e-08	68	0.0043162	9.80642e-07	-0.0229318	0.00281752	-8.13901	3.98533e-16	0.660162	0.0043162	9.80642e-07	2.31203e-13	37	16	85520007	16	84077508	F			NA	NA				chr16:85519109-85519357	S_Shore			NA	16:84077447-84077949			NA
cg10148841	-0.0184318	0.00426068	2.12399e-05	62	455	-0.0132556	0.00287698	4.35567e-06	1840	-0.0154493	0.00255349	1.77213e-09	68	0.00295588	1.72632e-07	-0.0151024	0.00185582	-8.13785	4.02372e-16	0.595576	0.00295588	1.72632e-07	2.33128e-13	37	11	124767455	11	124272665	R			NA	TRUE	ROBO4	NM_019055	Body					NA				NA
cg23786209	-0.019516	0.00880993	0.0275612	62	455	-0.0406702	0.0063652	2.1036e-10	1840	-0.0421858	0.00728316	8.247e-09	68	0.00843086	5.6232e-07	-0.0358046	0.00440078	-8.13598	4.08623e-16	0.101489	0.00843086	5.6232e-07	2.36442e-13	37	10	116285554	10	116275544	R			NA	NA	ABLIM1;ABLIM1;ABLIM1;ABLIM1	NM_001003408;NM_001003407;NM_006720;NM_002313	Body;Body;5'UTR;Body					TRUE		10:116285470-116285662	Promoter_Associated_Cell_type_specific	NA
cg14780255	-0.0169543	0.00666608	0.0115248	62	455	-0.0228511	0.00375524	1.41286e-09	1840	-0.0227122	0.00406161	2.60887e-08	68	0.00470165	1.36062e-06	-0.0218487	0.00268555	-8.13565	4.09729e-16	0.724676	0.00470165	1.36062e-06	2.36775e-13	37	1	201720358	1	199986981	F			NA	NA	NAV1;NAV1	NM_001167738;NM_020443	Body;Body					TRUE				NA
cg08121652	-0.0112384	0.00839119	0.181573	62	455	-0.0331705	0.00489909	1.71732e-11	1840	-0.0287345	0.00510272	2.08742e-08	68	0.00590683	1.14672e-06	-0.0279814	0.00343954	-8.13524	4.11122e-16	0.0773264	0.00590683	1.14672e-06	2.37273e-13	37	1	48381824	1	48154411	R			NA	NA								TRUE				NA
cg16572910	-0.016901	0.00597236	0.00499863	62	455	-0.0204983	0.0040392	4.26949e-07	1840	-0.0182729	0.00276555	5.20909e-11	68	0.00320136	1.14411e-08	-0.0187969	0.00231309	-8.1263	4.42587e-16	0.858562	0.00320136	1.14411e-08	2.55102e-13	37	1	43880657	1	43653244	F			NA	NA								NA		1:43880265-43881214	Gene_Associated	TRUE
cg07380540	-0.0132204	0.00615318	0.03254	62	455	-0.0251764	0.00405632	6.66889e-10	1840	-0.0240627	0.00410021	5.26387e-09	68	0.00474634	3.98374e-07	-0.0224007	0.00275682	-8.12557	4.45254e-16	0.244535	0.00474634	3.98374e-07	2.56308e-13	37	1	1825861	1	1815721	F			NA	NA				chr1:1821405-1823272	S_Shelf			NA		1:1825715-1825971	Unclassified_Cell_type_specific	NA
cg04726374	-0.0348378	0.00862151	6.91223e-05	62	455	-0.0371247	0.00641062	8.204e-09	1840	-0.0307736	0.00653829	2.72023e-06	68	0.00756861	4.78363e-05	-0.0345608	0.0042546	-8.12316	4.54187e-16	0.81409	0.00756861	4.78363e-05	2.61114e-13	37	17	40554519	17	37808045	F			NA	NA	PTRF	NM_012232	3'UTR	chr17:40556632-40557537	N_Shelf			TRUE				NA
cg22272713	-0.0143653	0.00605215	0.0183011	62	455	-0.0313251	0.00481592	1.0018e-10	1840	-0.0264295	0.00477596	3.6179e-08	68	0.00552857	1.74841e-06	-0.0252826	0.00311385	-8.11939	4.68551e-16	0.0875435	0.00552857	1.74841e-06	2.69025e-13	37	8	21780820	8	21836766	R			NA	NA	XPO7;XPO7	NM_001100161;NM_015024	Body;Body	chr8:21776842-21777942	S_Shelf		RDMR	NA				NA
cg18085636	-0.0150199	0.00577666	0.00982163	62	455	-0.0283654	0.00455026	5.63106e-10	1840	-0.0213527	0.00379349	2.11677e-08	68	0.00439129	1.15906e-06	-0.0224972	0.00277219	-8.11531	4.84539e-16	0.182081	0.00439129	1.15906e-06	2.77847e-13	37	10	89993734	10	89983714	F			NA	NA								TRUE				NA
cg13356370	-0.00993508	0.0050653	0.0508375	62	455	-0.0273202	0.00417215	7.53153e-11	1840	-0.0200595	0.00339299	4.0694e-09	68	0.00392767	3.26935e-07	-0.0201991	0.00249031	-8.11107	5.01743e-16	0.0298884	0.00392767	3.26935e-07	2.87171e-13	37	15	65504725	15	63291778	F			NA	NA	CILP	NM_003613	TSS1500					NA		15:65504273-65504930	Unclassified	NA
cg04833379	-0.0120167	0.00430868	0.00565588	62	455	-0.0228929	0.00312926	3.80317e-13	1840	-0.0109938	0.00264887	3.48231e-05	68	0.00306629	0.000336595	-0.0158357	0.00195237	-8.11099	5.02086e-16	0.0152592	0.00306629	0.000336595	2.87171e-13	37	16	79452063	16	78009564	R			NA	NA								TRUE	16:78009539-78009585			NA
cg05428706	-0.0263567	0.00688493	0.000159772	62	455	-0.03321	0.00583588	1.46952e-08	1840	-0.0230409	0.00440786	1.93167e-07	68	0.00510247	6.31285e-06	-0.0271879	0.0033545	-8.1049	5.27871e-16	0.418957	0.00510247	6.31285e-06	3.01532e-13	37	10	102730130	10	102720120	F			NA	NA				chr10:102729299-102729710	S_Shore			NA				TRUE
cg09737078	-0.0195092	0.00832746	0.0198523	62	455	-0.0371903	0.00540452	8.10187e-12	1840	-0.0233588	0.00483447	1.47444e-06	68	0.00559631	2.99346e-05	-0.0285461	0.00352265	-8.10359	5.3361e-16	0.10051	0.00559631	2.99346e-05	3.0442e-13	37	16	4366839	16	4306840	R			NA	NA				chr16:4366358-4366982	Island			NA	16:4304694-4306864			NA
cg27615366	-0.0151251	0.00766344	0.0494161	62	455	-0.0255884	0.00453089	1.88177e-08	1840	-0.0251501	0.00387921	1.1705e-10	68	0.00449051	2.13467e-08	-0.0238551	0.00294461	-8.10129	5.43781e-16	0.465982	0.00449051	2.13467e-08	3.09522e-13	37	5	131592974	5	131620873	R			NA	NA	PDLIM4;PDLIM4	NM_001131027;NM_003687	TSS1500;TSS1500	chr5:131593039-131593813	N_Shore			NA				TRUE
cg26204079	-0.017902	0.00778415	0.0222058	62	455	-0.0403472	0.00644405	4.7441e-10	1840	-0.0392318	0.0065399	2.41936e-09	68	0.00757048	2.19282e-07	-0.0336289	0.00415108	-8.10122	5.44092e-16	0.0573665	0.00757048	2.19282e-07	3.09522e-13	37	2	234262348	2	233927087	F			NA	NA	DGKD	NM_152879	TSS1500					NA	2:233927074-233927541			TRUE
cg13100137	-0.0190896	0.00673246	0.00491444	62	455	-0.0232431	0.00518041	7.68016e-06	1840	-0.0264302	0.00368767	1.13324e-12	68	0.00426879	5.95932e-10	-0.0239722	0.00295913	-8.1011	5.44633e-16	0.644897	0.00426879	5.95932e-10	3.09522e-13	37	1	37937945	1	37710532	F			NA	NA				chr1:37939723-37940650	N_Shore			TRUE				NA
cg10603592	-0.0205952	0.00556453	0.000259051	62	455	-0.0314724	0.00474426	4.28894e-11	1840	-0.0112225	0.00200175	2.40395e-08	68	0.00231719	1.27788e-06	-0.0157949	0.00195007	-8.09965	5.51178e-16	0.000418487	0.00231719	1.27788e-06	3.12843e-13	37	17	40896097	17	38149623	R			NA	NA	EZH1	NM_001991	5'UTR	chr17:40896658-40897234	N_Shore		RDMR	NA		17:40896052-40897643	Promoter_Associated	NA
cg26474043	-0.0117556	0.00533174	0.0282905	62	455	-0.0261456	0.00438574	2.98896e-09	1840	-0.0270848	0.00421382	1.676e-10	68	0.00487785	2.81429e-08	-0.022533	0.00278213	-8.0992	5.53211e-16	0.0597491	0.00487785	2.81429e-08	3.13598e-13	37	5	148442857	5	148423050	F			NA	NA	SH3TC2	NM_024577	TSS200					TRUE				TRUE
cg01885635	-0.0206867	0.00493957	3.79042e-05	62	455	-0.0229384	0.00408981	2.34837e-08	1840	-0.0157647	0.00317652	7.6349e-07	68	0.00367709	1.80865e-05	-0.0193738	0.00239231	-8.09835	5.5709e-16	0.407869	0.00367709	1.80865e-05	3.15396e-13	37	3	40566085	3	40541089	R			NA	TRUE	ZNF621;ZNF621	NM_198484;NM_001098414	TSS1500;TSS1500	chr3:40566129-40566689	N_Shore			NA		3:40565782-40567005	Promoter_Associated	NA
cg20430909	-0.016596	0.00568741	0.00381251	62	455	-0.0188877	0.00341782	3.73861e-08	1840	-0.0182966	0.00306293	2.81713e-09	68	0.0035456	2.46483e-07	-0.0182865	0.00225839	-8.09717	5.62504e-16	0.942093	0.0035456	2.46483e-07	3.18057e-13	37	4	158917335	4	159136785	F			NA	NA								TRUE				NA
cg26581206	-0.0159493	0.00628078	0.011654	62	455	-0.0219812	0.00472597	3.53618e-06	1840	-0.0301608	0.00406902	1.94066e-13	68	0.00471023	1.52088e-10	-0.0238543	0.00294633	-8.09627	5.66695e-16	0.170859	0.00471023	1.52088e-10	3.20021e-13	37	12	125003558	12	123569511	F	rs78404451		NA	NA	NCOR2;NCOR2	NM_006312;NM_001077261	5'UTR;5'UTR	chr12:125002006-125002433	S_Shore		RDMR	TRUE				NA
cg16906765	-0.0175709	0.00636197	0.00613304	62	455	-0.0255824	0.0042653	2.4019e-09	1840	-0.0192732	0.00343221	2.2838e-08	68	0.00397307	1.2286e-06	-0.0214039	0.00264421	-8.09464	5.74334e-16	0.447018	0.00397307	1.2286e-06	3.23925e-13	37	15	75475038	15	73262091	R			NA	NA				chr15:75470911-75471212	S_Shelf			NA		15:75474998-75475321	Unclassified_Cell_type_specific	NA
cg04315923	-0.0125774	0.00350201	0.000389136	62	455	-0.0123704	0.00182577	1.66409e-11	1840	-0.00674672	0.00170963	8.25764e-05	68	0.00197904	0.000651822	-0.0101423	0.00125309	-8.09385	5.78096e-16	0.0855789	0.00197904	0.000651822	3.25635e-13	37	16	29634191	16	29541692	F	rs2549956		NA	NA								NA	16:29541509-29541693			NA
cg13916835	-0.0406521	0.0122384	0.0010154	62	455	-0.0377155	0.00703012	9.12622e-08	1840	-0.0397767	0.0067776	5.25752e-09	68	0.00784564	3.98005e-07	-0.0389457	0.0048137	-8.0906	5.93699e-16	0.969824	0.00784564	3.98005e-07	3.34003e-13	37	17	2078431	17	2025181	F			NA	NA	SMG6;SMG6	NM_017575;NM_001170957	Body;Body					TRUE		17:2077941-2078890	Unclassified_Cell_type_specific	TRUE
cg23890469	-0.011311	0.00654366	0.0850102	62	455	-0.0254265	0.00449202	1.7487e-08	1840	-0.0215003	0.0032043	2.63945e-11	68	0.00370925	6.77452e-09	-0.0212023	0.00262076	-8.09014	5.95962e-16	0.204369	0.00370925	6.77452e-09	3.34854e-13	37	10	88715317	10	88705297	F			NA	NA	MMRN2	NM_024756	Body					TRUE				NA
cg20981219	-0.0248453	0.00770109	0.00140557	62	455	-0.0322375	0.00570283	1.82508e-08	1840	-0.028025	0.00497032	2.00293e-08	68	0.00575356	1.11094e-06	-0.0290005	0.00358476	-8.08994	5.96945e-16	0.725403	0.00575356	1.11094e-06	3.34984e-13	37	14	77385200	14	76454953	R			NA	NA								TRUE				NA
cg14983777	-0.0356338	0.0130157	0.00658809	62	455	-0.0430049	0.00673724	2.19e-10	1840	-0.0349716	0.00715592	1.11899e-06	68	0.00828358	2.42361e-05	-0.0392271	0.00485029	-8.08759	6.08551e-16	0.720882	0.00828358	2.42361e-05	3.41068e-13	37	7	1052392	7	1018918	R			NA	NA	C7orf50;C7orf50;C7orf50	NM_001134395;NM_032350;NM_001134396	Body;Body;Body	chr7:1052387-1052736	Island			NA	7:1018513-1019389			NA
cg20295214	-0.0143607	0.00439262	0.00121495	62	455	-0.0260248	0.00428086	1.46374e-09	1840	-0.0143594	0.00256866	2.63404e-08	68	0.00297344	1.37068e-06	-0.0172597	0.00213444	-8.08632	6.14957e-16	0.0614449	0.00297344	1.37068e-06	3.43951e-13	37	1	206226794	1	204393417	R			NA	NA	AVPR1B	NM_000707	Body	chr1:206223537-206224028	S_Shelf			NA				NA
cg08973950	-0.0287684	0.00937587	0.00236654	62	455	-0.0384128	0.00616748	5.8291e-10	1840	-0.031973	0.00649767	9.45166e-07	68	0.00752159	2.12976e-05	-0.0343735	0.00425085	-8.08626	6.15238e-16	0.641408	0.00752159	2.12976e-05	3.43951e-13	37	7	1083309	7	1049835	F	rs77116012		NA	NA	C7orf50;C7orf50;C7orf50	NM_001134395;NM_032350;NM_001134396	Body;Body;Body	chr7:1084387-1084595	N_Shore			NA	7:1049652-1050000	7:1083296-1085050	Promoter_Associated	NA
cg13277254	-0.00903926	0.0053323	0.0911674	62	455	-0.0260316	0.00422444	8.79513e-10	1840	-0.0205932	0.00320419	1.68308e-10	68	0.00370912	2.82344e-08	-0.0199732	0.00247013	-8.08589	6.17122e-16	0.0430824	0.00370912	2.82344e-08	3.44573e-13	37	5	171333801	5	171266406	R			NA	NA	FBXW11;FBXW11;FBXW11	NM_033645;NM_012300;NM_033644	Body;Body;Body					TRUE				NA
cg11997223	-0.00505178	0.00489479	0.302942	62	455	-0.0207537	0.00326167	2.49222e-10	1840	-0.0198922	0.00305094	9.22265e-11	68	0.00353172	1.77666e-08	-0.0173984	0.00215211	-8.08437	6.2488e-16	0.0190692	0.00353172	1.77666e-08	3.48468e-13	37	19	42754574	19	47446414	F			NA	NA	ERF	NM_006494	Body	chr19:42757495-42759475	N_Shelf			NA				TRUE
cg06537575	-0.0125339	0.00394498	0.00165608	62	455	-0.0250798	0.00347688	7.9446e-13	1840	-0.0122843	0.00312036	8.58781e-05	68	0.00361208	0.000671681	-0.0170893	0.00211467	-8.08131	6.40725e-16	0.0151114	0.00361208	0.000671681	3.56858e-13	37	7	138347530	7	137998070	R			NA	NA	SVOPL;SVOPL	NM_001139456;NM_174959	Body;Body	chr7:138348962-138349444	N_Shore		RDMR	TRUE				NA
cg22900075	-0.0187336	0.00550477	0.00076487	62	455	-0.0258314	0.00421939	1.12624e-09	1840	-0.0190704	0.00390316	1.12572e-06	68	0.00451824	2.43476e-05	-0.0217388	0.0026904	-8.08012	6.47006e-16	0.452117	0.00451824	2.43476e-05	3.59907e-13	37	17	55952563	17	53307562	F	rs75249618		NA	NA	CUEDC1	NM_017949	Body					TRUE		17:55951749-55953404	Unclassified	NA
cg11639950	-0.0135934	0.00554045	0.0147667	62	455	-0.0219712	0.00373475	4.77774e-09	1840	-0.0227318	0.00380593	2.83096e-09	68	0.00440568	2.47412e-07	-0.0204708	0.00253355	-8.07989	6.48258e-16	0.37426	0.00440568	2.47412e-07	3.60154e-13	37	12	125003407	12	123569360	F			NA	NA	NCOR2;NCOR2	NM_006312;NM_001077261	5'UTR;5'UTR	chr12:125003217-125003482	Island		RDMR	TRUE	12:123568738-123569372			NA
cg06768361	-0.0166609	0.00674602	0.0141266	62	455	-0.0190846	0.00319197	2.69122e-09	1840	-0.0126135	0.00213559	4.2107e-09	68	0.00247213	3.35618e-07	-0.0151652	0.00187729	-8.07825	6.57031e-16	0.269501	0.00247213	3.35618e-07	3.64574e-13	37	12	117480333	12	115964716	F	rs11323729		NA	NA	TESC;TESC;TESC	NR_031766;NM_017899;NM_001168325	Body;Body;Body	chr12:117484305-117484627	N_Shelf			NA				TRUE
cg01956154	-0.0117137	0.00409014	0.00450602	62	455	-0.019898	0.00326063	1.27011e-09	1840	-0.0145421	0.0026466	4.50434e-08	68	0.00306366	2.06833e-06	-0.0158275	0.00195975	-8.07631	6.67571e-16	0.253333	0.00306366	2.06833e-06	3.69963e-13	37	14	94423399	14	93493152	R			NA	NA	ASB2;ASB2	NM_016150;NM_016150	5'UTR;1stExon					TRUE				NA
cg05969378	-0.0221366	0.00615847	0.000384864	62	455	-0.0248588	0.00471517	1.50754e-07	1840	-0.0212026	0.00367727	9.61765e-09	68	0.00425674	6.32752e-07	-0.0226969	0.00281124	-8.07363	6.8241e-16	0.842933	0.00425674	6.32752e-07	3.77717e-13	37	1	167091161	1	165357785	R			NA	NA	DUSP27	NM_001080426	Body	chr1:167090575-167091010	S_Shore			TRUE				TRUE
cg00549412	-0.0270168	0.00923355	0.00371971	62	455	-0.025606	0.00530827	1.52454e-06	1840	-0.0290868	0.00433759	2.71264e-11	68	0.00502112	6.91891e-09	-0.0273855	0.00339261	-8.0721	6.90994e-16	0.891912	0.00502112	6.91891e-09	3.81995e-13	37	21	43933482	21	42806551	F			NA	NA	SLC37A1	NM_018964	5'UTR	chr21:43933589-43934832	N_Shore			NA	21:42806487-42807901	21:43933463-43934833	Promoter_Associated_Cell_type_specific	TRUE
cg09648727	-0.0119325	0.011208	0.287967	62	455	-0.041327	0.00658778	4.39612e-10	1840	-0.042081	0.00658432	2.11778e-10	68	0.0076219	3.36965e-08	-0.0367431	0.0045541	-8.06813	7.13851e-16	0.0530005	0.0076219	3.36965e-08	3.94142e-13	37	17	79361742	17	76976337	R			NA	NA				chr17:79360383-79361723	S_Shore			TRUE	17:76976181-76976338			NA
cg17579786	-0.0069111	0.00394178	0.0806618	62	455	-0.0147608	0.00215875	1.09147e-11	1840	-0.0099781	0.00196125	4.0241e-07	68	0.00227031	1.10757e-05	-0.0117307	0.00145409	-8.06739	7.1815e-16	0.131262	0.00227031	1.10757e-05	3.96026e-13	37	3	72328820	3	72411510	F			NA	NA								TRUE				NA
cg22950598	-0.0194786	0.00837068	0.0206888	62	455	-0.0318577	0.00524299	1.49158e-09	1840	-0.0277307	0.00485945	1.35587e-08	68	0.00562522	8.23548e-07	-0.0281241	0.00348679	-8.06591	7.26908e-16	0.454132	0.00562522	8.23548e-07	4.0036e-13	37	12	56139862	12	54426129	R			NA	NA	GDF11	NM_005811	Body	chr12:56136783-56137784	S_Shelf			NA				TRUE
cg09938049	-0.0141294	0.00524419	0.00748591	62	455	-0.0229628	0.0041795	4.47302e-08	1840	-0.0203607	0.00324558	4.4645e-10	68	0.00375703	5.98148e-08	-0.0198887	0.00246592	-8.06546	7.29632e-16	0.414189	0.00375703	5.98148e-08	4.01189e-13	37	12	54747206	12	53033473	R			NA	NA								TRUE				NA
cg14621323	-0.0318967	0.0115521	0.00614686	62	455	-0.0362079	0.00508845	1.58889e-12	1840	-0.0189082	0.00464763	4.94964e-05	68	0.00538002	0.000440536	-0.0283978	0.00352096	-8.06536	7.30212e-16	0.062078	0.00538002	0.000440536	4.01189e-13	37	5	176827161	5	176759767	R			NA	NA	PFN3;PFN3	NM_001029886;NM_001029886	1stExon;3'UTR	chr5:176827081-176827754	Island			NA	5:176759712-176760347			NA
cg14545975	-0.0225537	0.00710518	0.00167216	62	455	-0.0267486	0.00497981	8.80512e-08	1840	-0.022254	0.00372927	2.9229e-09	68	0.00431694	2.53561e-07	-0.023899	0.00296444	-8.06189	7.51245e-16	0.775501	0.00431694	2.53561e-07	4.12238e-13	37	9	137297213	9	136437034	F	rs12339491		NA	NA	RXRA	NM_002957	Body	chr9:137299190-137299437	N_Shore			TRUE		9:137297113-137297457	Unclassified	TRUE
cg21901395	-0.0325378	0.0075028	2.02925e-05	62	455	-0.0267552	0.00518315	2.70804e-07	1840	-0.0239786	0.00458862	1.94771e-07	68	0.00531171	6.35298e-06	-0.0268029	0.00332539	-8.06008	7.62418e-16	0.648215	0.00531171	6.35298e-06	4.17855e-13	37	17	46604235	17	43959234	R			NA	NA				chr17:46604362-46604881	N_Shore		RDMR	NA				NA
cg07504763	-0.0101204	0.00567779	0.0757752	62	455	-0.025215	0.00368356	1.03632e-11	1840	-0.0300839	0.00559794	8.75275e-08	68	0.00648009	3.44183e-06	-0.0224742	0.00278928	-8.05736	7.79576e-16	0.0356708	0.00648009	3.44183e-06	4.26734e-13	37	1	198575077	1	196841700	F			NA	NA								TRUE				NA
cg13458609	-0.00618675	0.00544684	0.257008	62	455	-0.0251124	0.00351628	1.32158e-12	1840	-0.0218095	0.0040814	1.0332e-07	68	0.00472456	3.90842e-06	-0.0201817	0.00250482	-8.05713	7.81048e-16	0.0129932	0.00472456	3.90842e-06	4.27016e-13	37	9	130608923	9	129648744	R			NA	NA	ENG;ENG	NM_001114753;NM_000118	Body;Body					TRUE				NA
cg10590964	-0.0145413	0.00790688	0.0669785	62	455	-0.0410558	0.00526954	1.10131e-14	1840	-0.0197473	0.00494206	6.72166e-05	68	0.00572084	0.000556812	-0.0280332	0.00348023	-8.05498	7.94903e-16	0.00385514	0.00572084	0.000556812	4.34059e-13	37	2	202929157	2	202637402	R			NA	NA								TRUE		2:202929042-202929205	Unclassified_Cell_type_specific	NA
cg20152430	-0.0180835	0.0105698	0.088229	62	455	-0.0286827	0.00483702	3.61321e-09	1840	-0.0323457	0.00526775	1.02127e-09	68	0.00609787	1.13021e-07	-0.028729	0.00356722	-8.05362	8.03803e-16	0.505035	0.00609787	1.13021e-07	4.38382e-13	37	17	46641504	17	43996503	F			NA	NA	HOXB3	NM_002146	5'UTR	chr17:46641534-46642110	N_Shore			NA		17:46641394-46642076	Unclassified_Cell_type_specific	TRUE
cg18280057	-0.0116422	0.00594262	0.0511073	62	455	-0.0287819	0.00376065	3.13715e-14	1840	-0.0150658	0.00394741	0.000140103	68	0.00456946	0.000977039	-0.0210072	0.00260893	-8.05206	8.14117e-16	0.0146387	0.00456946	0.000977039	4.43465e-13	37	8	125741158	8	125810339	F			NA	NA	MTSS1	NM_014751	TSS1500	chr8:125739685-125741266	Island			NA	8:125809815-125810528			NA
cg01782486	-0.0190366	0.00544072	0.000544411	62	455	-0.0214341	0.0044549	1.62124e-06	1840	-0.0214694	0.00341179	3.95298e-10	68	0.00394943	5.44696e-08	-0.0209032	0.00259692	-8.04922	8.3323e-16	0.926602	0.00394943	5.44696e-08	4.53323e-13	37	1	154986512	1	153253136	F			NA	TRUE	ZBTB7B	NM_015872	5'UTR	chr1:154989749-154990234	N_Shelf			NA		1:154986090-154986631	Promoter_Associated_Cell_type_specific	NA
cg12417775	-0.022046	0.00650196	0.000799098	62	455	-0.0398431	0.00581374	9.81367e-12	1840	-0.0230235	0.00581226	7.7636e-05	68	0.00672818	0.000621753	-0.0293224	0.00364345	-8.04798	8.41702e-16	0.067083	0.00672818	0.000621753	4.57374e-13	37	1	212463238	1	210529861	F			NA	NA	PPP2R5A	NM_006243	Body	chr1:212457967-212459694	S_Shelf			NA				NA
cg06663317	-0.0256539	0.00734472	0.000556419	62	455	-0.0305123	0.00526573	8.04385e-09	1840	-0.0215844	0.00411342	1.7354e-07	68	0.00476163	5.81533e-06	-0.0256106	0.00318292	-8.04628	8.53489e-16	0.453511	0.00476163	5.81533e-06	4.63215e-13	37	16	56641101	16	55198602	F			NA	NA	MT2A	NM_005953	TSS1500	chr16:56642129-56642595	N_Shore		RDMR	TRUE		16:56640918-56641506	Unclassified_Cell_type_specific	TRUE
cg18554395	-0.00963	0.00465679	0.0395765	62	455	-0.0175057	0.00246796	1.86197e-12	1840	-0.0118881	0.00280988	2.4516e-05	68	0.00325267	0.000257315	-0.0145723	0.00181127	-8.04535	8.59988e-16	0.199875	0.00325267	0.000257315	4.66175e-13	37	19	2555791	19	2506791	F			NA	NA	GNG7	NM_052847	5'UTR	chr19:2555751-2556146	Island			TRUE	19:2506539-2508461			NA
cg09452027	-0.0223975	0.00790577	0.00495046	62	455	-0.0223896	0.00485381	4.24717e-06	1840	-0.0314007	0.0044442	2.31869e-12	68	0.00514454	1.03643e-09	-0.0259291	0.00322364	-8.04342	8.73668e-16	0.394057	0.00514454	1.03643e-09	4.72672e-13	37	11	45825483	11	45782059	R			NA	NA	SLC35C1;SLC35C1;SLC35C1	NM_001145266;NM_018389;NM_001145265	TSS200;TSS1500;TSS200	chr11:45825615-45826872	N_Shore			NA	11:45782021-45783553			NA
cg05418765	-0.0236375	0.00899776	0.00909453	62	455	-0.0284895	0.00506828	2.18752e-08	1840	-0.024665	0.00413255	2.9041e-09	68	0.00478377	2.52307e-07	-0.026099	0.00324479	-8.04336	8.74093e-16	0.824004	0.00478377	2.52307e-07	4.72672e-13	37	11	46271147	11	46227723	R			NA	NA								TRUE				NA
cg21927426	-0.0201291	0.00688606	0.00375207	62	455	-0.0235167	0.00521602	6.93872e-06	1840	-0.023919	0.00344136	5.15797e-12	68	0.00398367	1.92207e-09	-0.0231353	0.00287649	-8.04291	8.77317e-16	0.889302	0.00398367	1.92207e-09	4.73841e-13	37	11	74854138	11	74531786	F			NA	NA								TRUE		11:74853923-74854624	Unclassified_Cell_type_specific	TRUE
cg15056348	-0.0191007	0.00596116	0.00151333	62	455	-0.0220856	0.00417113	1.33363e-07	1840	-0.0188864	0.0031556	2.62863e-09	68	0.00365287	2.33713e-07	-0.0200692	0.00249563	-8.04175	8.85636e-16	0.83321	0.00365287	2.33713e-07	4.77756e-13	37	10	134350107	10	134200097	R			NA	NA	INPP5A	NM_005539	TSS1500	chr10:134350302-134351119	N_Shore			NA		10:134350087-134351822	Promoter_Associated	NA
cg00109344	-0.0134242	0.0049259	0.00683629	62	455	-0.0209198	0.00391189	1.00169e-07	1840	-0.0196056	0.00308421	2.63535e-10	68	0.00357023	3.98718e-08	-0.0186929	0.00232488	-8.04037	8.95692e-16	0.464534	0.00357023	3.98718e-08	4.82061e-13	37	9	116344532	9	115384353	R			NA	NA	RGS3;RGS3;RGS3;RGS3	NM_130795;NM_021106;NM_144488;NM_134427	Body;5'UTR;Body;5'UTR	chr9:116346400-116346603	N_Shore			NA		9:116343993-116345494	Promoter_Associated	NA
cg05934592	-0.0167303	0.00614555	0.00689485	62	455	-0.0188026	0.00383115	1.00226e-06	1840	-0.025757	0.00375249	9.32984e-12	68	0.00434383	3.03721e-09	-0.0209278	0.00260285	-8.04036	8.95778e-16	0.366005	0.00434383	3.03721e-09	4.82061e-13	37	14	54642178	14	53711928	R			NA	NA								TRUE		14:54642086-54642857	Unclassified	NA
cg09458197	-0.015146	0.00518097	0.00374937	62	455	-0.0226638	0.00416911	6.17173e-08	1840	-0.0247351	0.00399491	7.43559e-10	68	0.00462444	8.85512e-08	-0.0213694	0.00265796	-8.03978	8.99982e-16	0.355406	0.00462444	8.85512e-08	4.8374e-13	37	4	2536968	4	2506766	R			NA	NA				chr4:2537098-2539421	N_Shore			NA				NA
cg24679348	-0.00594979	0.00380297	0.118844	62	455	-0.0177994	0.00289677	9.80448e-10	1840	-0.0186189	0.00283368	6.63069e-11	68	0.00328023	1.3779e-08	-0.0151571	0.00188561	-8.0383	9.10969e-16	0.0201668	0.00328023	1.3779e-08	4.89057e-13	37	3	9995002	3	9970002	R			NA	NA	PRRT3	NM_207351	TSS1500	chr3:9993730-9994136	S_Shore			NA				NA
cg03840467	-0.0138448	0.00811454	0.089102	62	455	-0.0198473	0.00285482	4.97599e-12	1840	-0.015814	0.00361094	1.26171e-05	68	0.00417997	0.000154775	-0.018197	0.00226385	-8.03807	9.12624e-16	0.622861	0.00417997	0.000154775	4.89356e-13	37	17	75278162	17	72789757	F			NA	NA	2024-09-09	NM_001113491	Body	chr17:75277317-75278172	Island			NA	17:72788329-72789846			NA
cg04118190	-0.0261312	0.00708143	0.000270027	62	455	-0.0257825	0.00489678	1.56442e-07	1840	-0.0213261	0.00377149	1.82726e-08	68	0.00436582	1.0354e-06	-0.0237945	0.00296031	-8.03784	9.1434e-16	0.743276	0.00436582	1.0354e-06	4.89688e-13	37	2	96812528	2	96176255	R			NA	NA	DUSP2	NM_004418	TSS1500	chr2:96810443-96811454	S_Shore			NA		2:96811033-96812631	Promoter_Associated	NA
cg25684105	-0.0237589	0.00673621	0.000491958	62	455	-0.0352371	0.0057953	1.45519e-09	1840	-0.0304389	0.00641553	2.26297e-06	68	0.00742651	4.15512e-05	-0.0303767	0.00378116	-8.03371	9.45667e-16	0.434179	0.00742651	4.15512e-05	5.05858e-13	37	12	104613662	12	103137792	F			NA	NA	TXNRD1	NM_001093771	Body	chr12:104609397-104610172	S_Shelf			NA		12:104613505-104614107	Unclassified_Cell_type_specific	TRUE
cg06372654	-0.0196391	0.00600267	0.00120486	62	455	-0.0230273	0.00469967	1.0436e-06	1840	-0.0223047	0.0035162	2.86885e-10	68	0.0040703	4.25637e-08	-0.0219954	0.00273805	-8.03323	9.49387e-16	0.901192	0.0040703	4.25637e-08	5.0724e-13	37	7	128044655	7	127831891	R			NA	NA	IMPDH1;IMPDH1;IMPDH1;IMPDH1;IMPDH1;IMPDH1;IMPDH1	NM_001142576;NM_183243;NM_000883;NM_001142573;NM_001142574;NM_001102605;NM_001142575	Body;Body;Body;Body;Body;Body;Body	chr7:128045542-128046298	N_Shore			NA				NA
cg09978353	-0.0238533	0.00802506	0.00321602	62	455	-0.0342283	0.00533997	1.84625e-10	1840	-0.0219702	0.0045461	1.46689e-06	68	0.00526249	2.98171e-05	-0.0272653	0.00339607	-8.0285	9.86745e-16	0.235335	0.00526249	2.98171e-05	5.26095e-13	37	17	72759282	17	70270877	R			NA	NA	SLC9A3R1	NM_004252	Body					TRUE				NA
cg13054640	-0.0309659	0.00773063	7.95981e-05	62	455	-0.029609	0.00550932	8.66454e-08	1840	-0.0275529	0.00536875	3.19139e-07	68	0.00621477	9.27372e-06	-0.029205	0.00363769	-8.02846	9.87037e-16	0.938036	0.00621477	9.27372e-06	5.26095e-13	37	6	30647148	6	30755127	R			NA	NA	KIAA1949;KIAA1949	NM_001134870;NM_133471	Body;Body					NA		6:30646694-30647418	Promoter_Associated	TRUE
cg15871086	-0.0174927	0.00566976	0.00224025	62	455	-0.0293769	0.00444083	4.85022e-11	1840	-0.0180649	0.00399396	6.51402e-06	68	0.00462334	9.33239e-05	-0.0223869	0.00278857	-8.02808	9.90079e-16	0.128953	0.00462334	9.33239e-05	5.27087e-13	37	18	56526595	18	54677575	F			NA	NA				chr18:56530395-56531288	N_Shelf			TRUE				NA
cg03888223	-0.0252267	0.00529141	3.02268e-06	62	455	-0.0145952	0.00403467	0.000305535	1840	-0.0230847	0.00352748	7.87716e-11	68	0.00408336	1.57344e-08	-0.0202524	0.0025228	-8.02773	9.92908e-16	0.189114	0.00408336	1.57344e-08	5.27963e-13	37	13	51633010	13	50531011	R			NA	NA	GUCY1B2	NR_003923	Body					TRUE				NA
cg14438325	-0.0304521	0.0076673	9.11198e-05	62	455	-0.0227774	0.00447062	3.8469e-07	1840	-0.0236097	0.0042099	2.37987e-08	68	0.00487331	1.26805e-06	-0.0242945	0.00302682	-8.02643	1.00352e-15	0.677101	0.00487331	1.26805e-06	5.32972e-13	37	9	124023910	9	123063731	R			NA	NA								TRUE				NA
cg06856687	-0.0302993	0.00938228	0.00139042	62	455	-0.0373927	0.00655336	1.34613e-08	1840	-0.0365853	0.00676788	7.3626e-08	68	0.00783439	3.01451e-06	-0.0355525	0.00443079	-8.02395	1.02399e-15	0.814763	0.00783439	3.01451e-06	5.43198e-13	37	20	44934509	20	44367916	F			NA	NA				chr20:44935932-44937310	N_Shore		RDMR	NA				NA
cg03529261	-0.0193355	0.00861012	0.0255163	62	455	-0.0453144	0.006634	1.14497e-11	1840	-0.0313373	0.00627329	6.47164e-07	68	0.00726185	1.59363e-05	-0.0341592	0.00425728	-8.02372	1.02593e-15	0.0512368	0.00726185	1.59363e-05	5.43555e-13	37	4	185209641	4	185446635	R			NA	NA								TRUE		4:185209477-185209749	Unclassified_Cell_type_specific	NA
cg25266888	-0.0122501	0.00665013	0.0665353	62	455	-0.0249942	0.00378783	5.41239e-11	1840	-0.0170792	0.00320823	1.15201e-07	68	0.0037138	4.24841e-06	-0.0197638	0.00246322	-8.02358	1.0271e-15	0.156776	0.0037138	4.24841e-06	5.43555e-13	37	11	2482594	11	2439170	R			NA	NA	KCNQ1;KCNQ1	NM_000218;NM_181798	Body;TSS200					NA				NA
cg05997793	-0.0167894	0.00501172	0.000920702	62	455	-0.0220202	0.0040904	8.24682e-08	1840	-0.0212341	0.00367903	9.29852e-09	68	0.00425878	6.16574e-07	-0.020394	0.00254233	-8.02178	1.04225e-15	0.699673	0.00425878	6.16574e-07	5.50915e-13	37	3	37901338	3	37876342	F			NA	NA				chr3:37901938-37904039	N_Shore			NA				NA
cg15546227	-0.0146252	0.00619305	0.0188931	62	455	-0.0224725	0.00425049	1.39111e-07	1840	-0.0271527	0.00405801	2.98992e-11	68	0.00469749	7.45807e-09	-0.0225317	0.00280893	-8.02145	1.04507e-15	0.272834	0.00469749	7.45807e-09	5.51347e-13	37	1	61546247	1	61318835	F			NA	NA	NFIA;NFIA	NM_001145511;NM_001145512	Body;TSS1500	chr1:61548753-61549564	N_Shelf			NA				NA
cg05385331	-0.00953686	0.00688637	0.167205	62	455	-0.0303832	0.00496578	1.15115e-09	1840	-0.0269518	0.00415731	1.17277e-10	68	0.00481243	2.13785e-08	-0.0247759	0.00308873	-8.02139	1.04554e-15	0.0412432	0.00481243	2.13785e-08	5.51347e-13	37	1	41958055	1	41730642	F	rs10218591		NA	NA				chr1:41961850-41962316	N_Shelf			NA		1:41957450-41958708	Unclassified	NA
cg01188914	-0.0210036	0.00603687	0.00058421	62	455	-0.0191457	0.00371175	2.76297e-07	1840	-0.0219745	0.00373398	4.77827e-09	68	0.0043224	3.69842e-07	-0.0204638	0.00255198	-8.01877	1.06809e-15	0.879743	0.0043224	3.69842e-07	5.62575e-13	37	22	22306263	22	20636263	R			NA	NA	PPM1F	NM_014634	5'UTR	chr22:22306554-22307402	N_Shore			NA		22:22306231-22307778	Promoter_Associated	NA
cg02946885	-0.0336293	0.00828574	6.43093e-05	62	455	-0.0366823	0.00627232	5.86409e-09	1840	-0.0230647	0.00491552	2.91707e-06	68	0.00569012	5.04638e-05	-0.0301202	0.00375638	-8.0184	1.07135e-15	0.245197	0.00569012	5.04638e-05	5.63629e-13	37	14	90378680	14	89448433	R			NA	NA	C14orf143	NM_145231	Body					TRUE				NA
cg04064963	-0.0299021	0.00879292	0.00077149	62	455	-0.0343383	0.00580429	3.9238e-09	1840	-0.0308024	0.00629155	1.07095e-06	68	0.00728299	2.34354e-05	-0.0323204	0.00403338	-8.01321	1.11748e-15	0.886944	0.00728299	2.34354e-05	5.87205e-13	37	6	158243386	6	158163374	R			NA	NA	SNX9	NM_016224	TSS1500	chr6:158243601-158245035	N_Shore			NA				NA
cg26953469	-0.010997	0.00363231	0.00269841	62	455	-0.0192391	0.00309295	6.12735e-10	1840	-0.0146815	0.00287973	3.80838e-07	68	0.00333353	1.06181e-05	-0.0154108	0.00192337	-8.0124	1.12489e-15	0.216922	0.00333353	1.06181e-05	5.90399e-13	37	10	31872296	10	31912302	R			NA	NA								TRUE				NA
cg10535500	-0.0104611	0.00667392	0.118154	62	455	-0.030316	0.00429963	2.50651e-12	1840	-0.0234564	0.00473724	8.08972e-07	68	0.00548375	1.89058e-05	-0.0241786	0.00301789	-8.01174	1.13093e-15	0.0432933	0.00548375	1.89058e-05	5.92876e-13	37	6	33398610	6	33506588	R			NA	NA	SYNGAP1	NM_006772	Body	chr6:33396050-33396296	S_Shelf			NA		6:33398106-33399356	Unclassified	TRUE
cg05267118	-0.0206854	0.00604797	0.000720279	62	455	-0.0248692	0.0042799	7.31549e-09	1840	-0.0169457	0.0032202	1.60167e-07	68	0.00372766	5.46879e-06	-0.0204208	0.00254908	-8.01103	1.13755e-15	0.376953	0.00372766	5.46879e-06	5.95645e-13	37	11	2907884	11	2864460	R			NA	NA	CDKN1C;CDKN1C;CDKN1C	NM_000076;NM_001122631;NM_001122630	TSS1500;TSS1500;TSS1500	chr11:2905023-2907024	S_Shore			NA				NA
cg11950754	-0.0221258	0.00761959	0.00398462	62	455	-0.0315526	0.005769	5.13525e-08	1840	-0.0296091	0.00493735	2.44691e-09	68	0.0057154	2.21198e-07	-0.0287039	0.00358324	-8.01061	1.14142e-15	0.602228	0.0057154	2.21198e-07	5.96969e-13	37	1	53782077	1	53554665	R			NA	NA	LRP8;LRP8;LRP8;LRP8	NM_033300;NM_001018054;NM_017522;NM_004631	Body;Body;Body;Body					TRUE				NA
cg13080282	-0.024462	0.010738	0.0234869	62	455	-0.0413204	0.0068473	1.92277e-09	1840	-0.042167	0.00734484	1.1108e-08	68	0.00850226	7.06723e-07	-0.0382522	0.0047763	-8.00875	1.15878e-15	0.356636	0.00850226	7.06723e-07	6.0534e-13	37	12	24717178	12	24608445	R			NA	NA				chr12:24714956-24716243	S_Shore		CDMR	NA	12:24608075-24608453			NA
cg20686828	-0.0117974	0.00635693	0.0645425	62	455	-0.0253871	0.00376262	2.01283e-11	1840	-0.0218444	0.00438163	6.80723e-07	68	0.00507211	1.65653e-05	-0.0218564	0.00272923	-8.00828	1.16326e-15	0.184114	0.00507211	1.65653e-05	6.06968e-13	37	1	151764147	1	150030771	F			NA	NA	TDRKH;TDRKH;TDRKH;TDRKH	NM_001083965;NM_001083963;NM_006862;NM_001083964	TSS1500;TSS1500;TSS1500;TSS1500	chr1:151762604-151764007	S_Shore			NA		1:151763986-151764151	Promoter_Associated_Cell_type_specific	NA
cg18699466	-0.00660343	0.00391796	0.0930364	62	455	-0.0124771	0.00189224	5.58446e-11	1840	-0.0118659	0.00231244	3.20394e-07	68	0.00267684	9.30165e-06	-0.0115102	0.00143742	-8.00759	1.16978e-15	0.397087	0.00267684	9.30165e-06	6.091e-13	37	6	45415640	6	45523618	F			NA	NA	RUNX2;RUNX2;RUNX2	NM_001015051;NM_001024630;NM_004348	Body;Body;Body					TRUE				NA
cg19279042	-0.0160529	0.00439319	0.000308894	62	455	-0.0170587	0.00314302	6.47218e-08	1840	-0.0138819	0.00256433	7.05565e-08	68	0.00296843	2.9177e-06	-0.0155106	0.00193699	-8.00756	1.17007e-15	0.756203	0.00296843	2.9177e-06	6.091e-13	37	6	31550090	6	31658069	R			NA	NA	LTB;LTB	NM_002341;NM_009588	1stExon;1stExon	chr6:31548436-31549277	S_Shore			NA		6:31549959-31550509	Promoter_Associated	NA
cg14179401	-0.00535323	0.00470958	0.256663	62	455	-0.0232216	0.00280038	2.11723e-16	1840	-0.00919118	0.00236999	0.000109234	68	0.00274347	0.000807512	-0.0144817	0.00180934	-8.00388	1.20562e-15	0.000182622	0.00274347	0.000807512	6.26871e-13	37	17	46550107	17	43905106	F		rs62065840	NA	NA								TRUE				NA
cg08449164	-0.0108374	0.00461068	0.0194522	62	455	-0.032488	0.00413379	6.52888e-15	1840	-0.0116786	0.00253103	4.2399e-06	68	0.00292988	6.71853e-05	-0.0169845	0.00212213	-8.00353	1.20905e-15	7.03961e-05	0.00292988	6.71853e-05	6.27925e-13	37	2	54784402	2	54637906	F			NA	NA	SPTBN1;SPTBN1	NM_178313;NM_003128	TSS1500;Body	chr2:54785026-54785969	N_Shore			NA		2:54784133-54784466	Unclassified_Cell_type_specific	NA
cg02586712	-0.0209059	0.00751541	0.00577953	62	455	-0.031799	0.00486592	8.20963e-11	1840	-0.0212594	0.00455324	3.26136e-06	68	0.00527076	5.49619e-05	-0.0258341	0.00322857	-8.00172	1.2269e-15	0.261059	0.00527076	5.49619e-05	6.36455e-13	37	15	42249569	15	40036861	F			NA	NA	EHD4	NM_139265	Body					TRUE		15:42249566-42249743	Unclassified_Cell_type_specific	NA
cg03857553	-0.034261	0.00628233	1.09709e-07	62	455	-0.0169435	0.00445591	0.000147934	1840	-0.0206923	0.00357433	8.39674e-09	68	0.00413758	5.7014e-07	-0.0218479	0.00273063	-8.00107	1.23345e-15	0.0745143	0.00413758	5.7014e-07	6.39111e-13	37	22	29976613	22	28306613	F			NA	NA	NIPSNAP1	NM_003634	Body	chr22:29976920-29977216	N_Shore			NA		22:29976337-29977462	Promoter_Associated	NA
cg08263205	-0.0108647	0.00603593	0.0729506	62	455	-0.0332018	0.00416783	2.84103e-15	1840	-0.0137959	0.00344835	6.58415e-05	68	0.00399176	0.000548072	-0.0208113	0.00260136	-8.00016	1.24254e-15	0.000661387	0.00399176	0.000548072	6.43073e-13	37	1	175854934	1	174121557	F			NA	NA								TRUE				NA
cg25948037	-0.0205083	0.00612221	0.000921322	62	455	-0.0219219	0.00411888	1.15007e-07	1840	-0.0277824	0.00476137	6.42013e-09	68	0.00551168	4.63983e-07	-0.0232311	0.00290445	-7.99847	1.25979e-15	0.612413	0.00551168	4.63983e-07	6.51245e-13	37	4	57522988	4	57217745	F			NA	NA	HOPX;HOPX;HOPX;HOPX;HOPX	NM_139212;NM_032495;NM_001145460;NM_001145459;NM_139211	5'UTR;Body;Body;TSS1500;TSS1500	chr4:57521621-57522703	S_Shore			NA		4:57521411-57523249	Unclassified	NA
cg17453840	-0.00557908	0.00832161	0.503142	62	455	-0.0279954	0.00423956	5.243e-11	1840	-0.0343866	0.00563334	1.27561e-09	68	0.00652106	1.3409e-07	-0.0261426	0.00326873	-7.9978	1.26657e-15	0.0192974	0.00652106	1.3409e-07	6.53973e-13	37	15	83317526	15	81114581	R			NA	NA	CPEB1	NM_030594	TSS1500	chr15:83315116-83317541	Island			NA		15:83315862-83317582	Unclassified	TRUE
cg26580095	-0.0135715	0.00622946	0.0302074	62	455	-0.0234942	0.00452458	2.30373e-07	1840	-0.0272115	0.00395082	7.94282e-12	68	0.0045734	2.6824e-09	-0.0228573	0.00285799	-7.99767	1.268e-15	0.207194	0.0045734	2.6824e-09	6.53973e-13	37	1	92545650	1	92318238	F	rs79930065		NA	TRUE	BTBD8	NM_183242	TSS1500	chr1:92545819-92546480	N_Shore			NA		1:92545643-92546946	Promoter_Associated_Cell_type_specific	NA
cg26827653	-0.011468	0.00566773	0.0439967	62	455	-0.0161976	0.00248309	8.87163e-11	1840	-0.0238436	0.00460687	2.53844e-07	68	0.00533283	7.78226e-06	-0.0167299	0.00209207	-7.99681	1.27682e-15	0.260897	0.00533283	7.78226e-06	6.5776e-13	37	11	125366540	11	124871750	R			NA	NA	FEZ1;FEZ1	NM_022549;NM_005103	TSS1500;TSS1500	chr11:125365137-125366319	S_Shore			NA	11:124871696-124871751			TRUE
cg24215776	-0.0110164	0.00563396	0.0515494	62	455	-0.0216054	0.00418354	2.67365e-07	1840	-0.0216267	0.0031016	4.42113e-12	68	0.00359036	1.70637e-09	-0.0196083	0.00245281	-7.99423	1.30383e-15	0.238166	0.00359036	1.70637e-09	6.70314e-13	37	11	65152051	11	64908627	R			NA	NA				chr11:65153726-65154606	N_Shore			NA		11:65151999-65152128	Unclassified_Cell_type_specific	NA
cg01659184	-0.0192338	0.00586111	0.00116503	62	455	-0.031652	0.00504167	4.26557e-10	1840	-0.0201606	0.00418517	1.58464e-06	68	0.00484468	3.16326e-05	-0.0239884	0.00300073	-7.9942	1.30419e-15	0.165888	0.00484468	3.16326e-05	6.70314e-13	37	6	109127593	6	109234286	F			NA	NA								TRUE				NA
cg01801603	-0.0305625	0.00820878	0.000238489	62	455	-0.0317577	0.00609386	2.08449e-07	1840	-0.0316776	0.00572165	3.56562e-08	68	0.00662329	1.729e-06	-0.0314547	0.00393552	-7.99251	1.3222e-15	0.992321	0.00662329	1.729e-06	6.78789e-13	37	8	123795433	8	123864614	R			NA	NA	ZHX2	NM_014943	5'UTR	chr8:123792369-123794942	S_Shore		CDMR	NA		8:123795401-123795929	Promoter_Associated	NA
cg16659510	-0.0102844	0.00625409	0.101226	62	455	-0.0224737	0.00303482	1.98235e-13	1840	-0.0180923	0.00506807	0.000367031	68	0.00586671	0.00204317	-0.0197841	0.00247539	-7.9923	1.32445e-15	0.204353	0.00586671	0.00204317	6.79163e-13	37	16	87996870	16	86554371	F			NA	NA	BANP;BANP	NM_017869;NM_079837	5'UTR;5'UTR					NA	16:86554232-86554374	16:87996629-87997495	Promoter_Associated_Cell_type_specific	TRUE
cg20663495	-0.0256335	0.00648606	9.84749e-05	62	455	-0.0241928	0.00439766	4.29861e-08	1840	-0.0180246	0.00352792	3.59771e-07	68	0.00408386	1.01652e-05	-0.021715	0.00271725	-7.99152	1.3329e-15	0.472597	0.00408386	1.01652e-05	6.82711e-13	37	17	80943851	17	78537140	F	rs731447		NA	NA	B3GNTL1	NM_001009905	Body					TRUE		17:80943401-80944592	Promoter_Associated_Cell_type_specific	TRUE
cg00061031	-0.0161525	0.00551586	0.00369157	62	455	-0.0188825	0.00411772	4.83014e-06	1840	-0.0283921	0.00398816	1.59186e-12	68	0.00461663	7.74995e-10	-0.0214513	0.00268448	-7.99084	1.3402e-15	0.167601	0.00461663	7.74995e-10	6.85664e-13	37	9	100744026	9	99783847	R			NA	NA	ANP32B	NM_006401	TSS1500	chr9:100744982-100747768	N_Shore		CDMR	NA				NA
cg05823563	-0.0207851	0.00819474	0.0117513	62	455	-0.0333513	0.00597989	2.80593e-08	1840	-0.0319335	0.00521479	1.13172e-09	68	0.00603655	1.22304e-07	-0.030136	0.00377161	-7.99021	1.34709e-15	0.431745	0.00603655	1.22304e-07	6.88003e-13	37	9	104249936	9	103289757	F			NA	NA	C9orf125	NM_032342	TSS1500	chr9:104248247-104249501	S_Shore			NA				NA
cg20131596	-0.029409	0.00799835	0.000283704	62	455	-0.0309136	0.00552031	2.46719e-08	1840	-0.0260603	0.00512059	3.98887e-07	68	0.00592751	1.10014e-05	-0.0288117	0.00360591	-7.99014	1.34786e-15	0.832763	0.00592751	1.10014e-05	6.88003e-13	37	5	102201128	5	102229027	F			NA	TRUE	PAM;PAM;PAM;PAM	NM_138821;NM_000919;NM_138766;NM_138822	TSS1500;TSS1500;TSS1500;TSS1500	chr5:102201583-102201912	N_Shore			TRUE				NA
cg21104971	-0.0113457	0.00656869	0.0852425	62	455	-0.0365398	0.00568613	1.66276e-10	1840	-0.0352307	0.00560904	4.25379e-10	68	0.00649293	5.76312e-08	-0.0286381	0.00358459	-7.98922	1.35794e-15	0.00711056	0.00649293	5.76312e-08	6.92357e-13	37	4	24647197	4	24256295	F	rs13126010		NA	NA								TRUE				NA
cg27290215	-0.0214991	0.00816184	0.00891233	62	455	-0.0321127	0.00540503	3.37433e-09	1840	-0.0270207	0.00488793	3.73772e-08	68	0.00565819	1.79264e-06	-0.0281566	0.00352505	-7.98756	1.37633e-15	0.537573	0.00565819	1.79264e-06	7.00931e-13	37	10	116392933	10	116382923	F			NA	NA	ABLIM1;ABLIM1;ABLIM1	NM_001003408;NM_001003407;NM_002313	Body;Body;Body	chr10:116391466-116391827	S_Shore		RDMR	TRUE				TRUE
cg14260530	-0.0165342	0.0069089	0.0173717	62	455	-0.0241366	0.00417504	8.69579e-09	1840	-0.0239036	0.00407915	5.54137e-09	68	0.00472196	4.14402e-07	-0.0227586	0.00284938	-7.98723	1.38008e-15	0.612809	0.00472196	4.14402e-07	7.01793e-13	37	9	117157871	9	116197692	R			NA	NA	AKNA	NM_030767	TSS1500	chr9:117160139-117161064	N_Shelf			NA				NA
cg19251242	-0.0163266	0.00451743	0.000358058	62	455	-0.0159188	0.00276599	1.01162e-08	1840	-0.0118449	0.00234951	5.10944e-07	68	0.00271975	1.32981e-05	-0.0142333	0.00178203	-7.98713	1.38117e-15	0.507316	0.00271975	1.32981e-05	7.01793e-13	37	1	28198712	1	28071299	F			NA	NA	C1orf38;C1orf38;C1orf38	NM_001105556;NM_004848;NM_001039477	TSS1500;TSS1500;TSS1500	chr1:28199031-28199257	N_Shore			NA		1:28198541-28200383	Promoter_Associated	TRUE
cg01851782	-0.0143054	0.00572866	0.0131019	62	455	-0.0243026	0.00386104	3.85069e-10	1840	-0.0209011	0.00403661	2.50896e-07	68	0.00467272	7.71294e-06	-0.0210908	0.00264119	-7.98532	1.4016e-15	0.350543	0.00467272	7.71294e-06	7.11365e-13	37	16	49442215	16	47999716	F			NA	NA				chr16:49440973-49441301	S_Shore			NA		16:49440912-49442600	Unclassified	TRUE
cg02127172	-0.0127712	0.00532522	0.0171375	62	455	-0.0236726	0.00413678	1.22309e-08	1840	-0.0178259	0.0029098	1.11426e-09	68	0.00336833	1.20852e-07	-0.0187245	0.00234508	-7.98461	1.40966e-15	0.252631	0.00336833	1.20852e-07	7.13379e-13	37	16	3629620	16	3569621	R			NA	NA								TRUE		16:3628217-3629698	Unclassified_Cell_type_specific	TRUE
cg23581183	-0.0187996	0.00604283	0.00205955	62	455	-0.0223678	0.00406356	4.22245e-08	1840	-0.0249827	0.0043699	1.27655e-08	68	0.00505852	7.86322e-07	-0.022403	0.00280579	-7.98458	1.41006e-15	0.735016	0.00505852	7.86322e-07	7.13379e-13	37	16	56642130	16	55199631	R			NA	NA	MT2A	NM_005953	TSS1500	chr16:56642129-56642595	Island			NA	16:55199631-55200375	16:56641665-56642992	Promoter_Associated	NA
cg07765674	-0.0225066	0.00554074	6.34527e-05	62	455	-0.0208839	0.00384058	6.11814e-08	1840	-0.0178871	0.00362272	8.68457e-07	68	0.0041936	1.99613e-05	-0.0201363	0.00252191	-7.98455	1.41037e-15	0.775471	0.0041936	1.99613e-05	7.13379e-13	37	5	148494024	5	148474217	R			NA	NA								TRUE		5:148493908-148494084	Unclassified_Cell_type_specific	NA
cg18675610	-0.0187947	0.0107443	0.0813565	62	455	-0.0452688	0.00732678	7.94499e-10	1840	-0.0518472	0.00841027	8.78447e-10	68	0.00973559	1.00661e-07	-0.0410426	0.00514063	-7.98396	1.41715e-15	0.0536099	0.00973559	1.00661e-07	7.15997e-13	37	10	32216311	10	32256317	R			NA	NA	ARHGAP12	NM_018287	5'UTR	chr10:32216901-32217102	N_Shore			NA	10:32256289-32256423			NA
cg05000772	-0.0164609	0.00573628	0.00442754	62	455	-0.0211556	0.00391745	7.51519e-08	1840	-0.0211366	0.00352336	2.41691e-09	68	0.00407858	2.19112e-07	-0.0202317	0.00253455	-7.98237	1.43555e-15	0.764539	0.00407858	2.19112e-07	7.24476e-13	37	17	48194500	17	45549499	F			NA	NA	SAMD14	NM_174920	Body	chr17:48194634-48195085	N_Shore			NA				TRUE
cg22079043	-0.0318366	0.00784689	6.46914e-05	62	455	-0.0337346	0.00610348	3.72065e-08	1840	-0.0272026	0.00566538	1.71147e-06	68	0.00655815	3.3553e-05	-0.0309804	0.00388265	-7.97921	1.47274e-15	0.760574	0.00655815	3.3553e-05	7.424e-13	37	11	1785631	11	1742207	F			NA	NA	CTSD;HCCA2	NM_001909;NM_053005	TSS1500;TSS200	chr11:1784805-1785553	S_Shore			NA	11:1741393-1742327			NA
cg08443357	-0.0110127	0.0049979	0.0283887	62	455	-0.032671	0.00475447	8.65766e-12	1840	-0.0238147	0.0044377	9.12586e-08	68	0.00513701	3.55373e-06	-0.0228265	0.00286104	-7.97838	1.48269e-15	0.00704232	0.00513701	3.55373e-06	7.46312e-13	37	20	1310000	20	1258000	R			NA	NA	SDCBP2	NM_080489	TSS200	chr20:1305899-1306554	S_Shelf			NA				NA
cg05227215	-0.0132759	0.00439888	0.00278214	62	455	-0.0127169	0.00165875	2.84186e-14	1840	-0.0047734	0.00145966	0.00109599	68	0.00168968	0.00472756	-0.00911948	0.00114304	-7.97828	1.48384e-15	0.00222936	0.00168968	0.00472756	7.46312e-13	37	5	139057496	5	139037680	R			NA	NA	CXXC5	NM_016463	5'UTR	chr5:139056577-139056856	S_Shore			TRUE				NA
cg20289911	-0.00875055	0.00481656	0.070338	62	455	-0.0228342	0.00326177	3.55935e-12	1840	-0.0139211	0.00280912	7.91928e-07	68	0.00325179	1.86001e-05	-0.0165753	0.00207763	-7.978	1.48723e-15	0.030388	0.00325179	1.86001e-05	7.47174e-13	37	20	816362	20	764362	R			NA	TRUE	FAM110A;FAM110A	NM_207121;NM_001042353	TSS1500;5'UTR	chr20:814120-814755	S_Shore			NA		20:815940-816664	Unclassified_Cell_type_specific	NA
cg00274203	-0.00521839	0.00477799	0.275709	62	455	-0.0271981	0.00385682	2.48667e-12	1840	-0.0200536	0.00342558	5.73651e-09	68	0.0039654	4.25562e-07	-0.0190828	0.00239302	-7.97436	1.53171e-15	0.00157469	0.0039654	4.25562e-07	7.68657e-13	37	12	56661537	12	54947804	R			NA	NA	COQ10A;COQ10A	NM_001099337;NM_144576	Body;Body	chr12:56660442-56661131	S_Shore			NA	12:54946738-54947805			NA
cg20100049	-0.0215332	0.00693117	0.00208903	62	455	-0.0283927	0.00431079	5.86265e-11	1840	-0.0189929	0.00462439	4.19528e-05	68	0.00535312	0.000388167	-0.0240941	0.00302164	-7.97383	1.53834e-15	0.360781	0.00535312	0.000388167	7.71115e-13	37	11	67979188	11	67735764	R			NA	NA	SUV420H1;SUV420H1	NM_017635;NM_016028	5'UTR;5'UTR	chr11:67980011-67982068	N_Shore			NA	11:67735641-67735963	11:67978656-67980724	Promoter_Associated	NA
cg13443911	-0.0186001	0.00544779	0.000735593	62	455	-0.0255395	0.00445771	1.17585e-08	1840	-0.0220452	0.0042531	2.43795e-07	68	0.00492332	7.54516e-06	-0.0225223	0.00282533	-7.97155	1.56692e-15	0.61084	0.00492332	7.54516e-06	7.83882e-13	37	9	101866107	9	100905928	F			NA	NA	TGFBR1;TGFBR1	NM_001130916;NM_004612	TSS1500;TSS1500	chr9:101866994-101868297	N_Shore			TRUE				NA
cg08005460	-0.0194646	0.00749424	0.00990083	62	455	-0.0288497	0.00471316	1.13302e-09	1840	-0.0209367	0.00392726	1.10581e-07	68	0.00454614	4.11722e-06	-0.0239042	0.0029987	-7.97151	1.56744e-15	0.391005	0.00454614	4.11722e-06	7.83882e-13	37	17	38473382	17	35726908	R			NA	NA	RARA;RARA;RARA	NM_001145302;NM_000964;NM_001145301	TSS1500;5'UTR;TSS1500	chr17:38474197-38474980	N_Shore			TRUE		17:38472852-38476047	Promoter_Associated	NA
cg22660299	-0.0140761	0.00303715	5.51967e-06	62	455	-0.0122359	0.00415226	0.00325116	1840	-0.0104299	0.00153414	1.45469e-11	68	0.0017759	4.27876e-09	-0.0114641	0.00143816	-7.97138	1.56908e-15	0.573125	0.0017759	4.27876e-09	7.83882e-13	37	17	46668715	17	44023714	F			NA	NA	LOC404266;HOXB5;LOC404266;LOC404266;LOC404266	NR_033203;NM_002147;NR_033201;NR_033204;NR_033202	TSS1500;3'UTR;Body;TSS1500;Body	chr17:46669434-46669811	N_Shore		RDMR	NA				NA
cg07824177	-0.0301159	0.00821704	0.000296511	62	455	-0.0333379	0.00550092	1.64279e-09	1840	-0.0237728	0.00537037	1.01741e-05	68	0.00621666	0.000131274	-0.029334	0.00368273	-7.96528	1.64852e-15	0.511947	0.00621666	0.000131274	8.22647e-13	37	9	88896457	9	88086277	F			NA	NA	ISCA1	NM_030940	Body	chr9:88896741-88897721	N_Shore			NA				NA
cg15121420	-0.0171102	0.00682058	0.0126941	62	455	-0.0243447	0.00389759	5.21442e-10	1840	-0.0184186	0.00359664	3.38072e-07	68	0.00416341	9.69225e-06	-0.0209148	0.00262601	-7.96448	1.65922e-15	0.485536	0.00416341	9.69225e-06	8.27059e-13	37	2	238490819	2	238155558	R		rs73999142	NA	NA	RAB17	NM_022449	Body					TRUE		2:238490196-238490845	Unclassified	TRUE
cg22825202	-0.0253385	0.00557564	8.24363e-06	62	455	-0.0186243	0.00348627	1.03243e-07	1840	-0.0142442	0.00296895	1.7442e-06	68	0.00343681	3.4043e-05	-0.0178465	0.00224108	-7.96336	1.6743e-15	0.228325	0.00343681	3.4043e-05	8.33645e-13	37	14	77767650	14	76837403	R			NA	NA	POMT2	NM_013382	Body					NA		14:77766810-77768259	Unclassified	TRUE
cg20029201	-0.0349093	0.00882049	9.62971e-05	62	455	-0.0426774	0.00751229	1.55335e-08	1840	-0.0327742	0.00700438	3.10762e-06	68	0.00810815	5.29678e-05	-0.0372064	0.00467352	-7.96112	1.7049e-15	0.638581	0.00810815	5.29678e-05	8.47936e-13	37	11	118781813	11	118287023	F			NA	TRUE	BCL9L	NM_182557	TSS1500	chr11:118781060-118781732	S_Shore			NA				TRUE
cg09725874	-0.0183185	0.00562848	0.001277	62	455	-0.0351259	0.00546278	1.62137e-10	1840	-0.0181009	0.00364606	7.5726e-07	68	0.00422061	1.79734e-05	-0.0228642	0.00287227	-7.96032	1.71602e-15	0.0307432	0.00422061	1.79734e-05	8.52514e-13	37	1	27480106	1	27352693	R			NA	NA	SLC9A1	NM_003047	Body	chr1:27481345-27481742	N_Shore			TRUE				NA
cg10064322	-0.0283551	0.0109233	0.00994131	62	455	-0.0349293	0.00600054	6.88543e-09	1840	-0.0293427	0.00525976	2.81102e-08	68	0.00608861	1.44078e-06	-0.0316693	0.00398003	-7.95706	1.76175e-15	0.765972	0.00608861	1.44078e-06	8.7426e-13	37	19	14591203	19	14452203	F			NA	NA	GIPC1;GIPC1;GIPC1;GIPC1;GIPC1;GIPC1	NM_202470;NM_202468;NM_202494;NM_202467;NM_005716;NM_202469	Body;Body;Body;Body;Body;Body	chr19:14591032-14591308	Island			NA	19:14452047-14452463	19:14590683-14591386	Unclassified_Cell_type_specific	NA
cg27042983	-0.00925077	0.00626233	0.14076	62	455	-0.0232896	0.00407323	1.25707e-08	1840	-0.0237306	0.00358601	4.8699e-11	68	0.00415111	1.08626e-08	-0.0209782	0.00263702	-7.95527	1.78737e-15	0.118326	0.00415111	1.08626e-08	8.85989e-13	37	6	44063147	6	44171125	F			NA	NA								NA				NA
cg18096388	-0.00968671	0.00495262	0.0514884	62	455	-0.0230891	0.00376457	1.05129e-09	1840	-0.0166052	0.00278111	2.86528e-09	68	0.00321937	2.49712e-07	-0.0174495	0.00219362	-7.95466	1.79624e-15	0.0921005	0.00321937	2.49712e-07	8.89397e-13	37	2	242800973	2	242449646	F	rs55970948		NA	TRUE	PDCD1	NM_005018	1stExon	chr2:242799488-242799696	S_Shore			NA				TRUE
cg13702235	-0.0204965	0.00664355	0.00224085	62	455	-0.0251956	0.00532998	2.44995e-06	1840	-0.0265832	0.00406549	8.16447e-11	68	0.00470614	1.61747e-08	-0.0247703	0.00311575	-7.95	1.86511e-15	0.752544	0.00470614	1.61747e-08	9.22473e-13	37	4	159689189	4	159908639	R			NA	NA	FNIP2	NM_020840	TSS1500	chr4:159689700-159690823	N_Shore			NA				NA
cg13480898	-0.0102084	0.00532122	0.0560884	62	455	-0.0289775	0.00426251	1.42634e-11	1840	-0.0221007	0.0041784	1.38587e-07	68	0.00483684	4.8948e-06	-0.0217889	0.00274102	-7.9492	1.87718e-15	0.0225435	0.00483684	4.8948e-06	9.27417e-13	37	19	10195914	19	10056914	R			NA	NA	C19orf66	NM_018381	TSS1500	chr19:10196696-10197857	N_Shore			NA		19:10195889-10196300	Unclassified_Cell_type_specific	NA
cg22052056	-0.0145369	0.00608028	0.0174808	62	455	-0.0252091	0.00444251	1.61233e-08	1840	-0.0221744	0.00366826	1.83046e-09	68	0.00424632	1.76982e-07	-0.0217778	0.00274022	-7.94747	1.90364e-15	0.363583	0.00424632	1.76982e-07	9.39447e-13	37	20	31351813	20	30815474	F			NA	NA	DNMT3B;DNMT3B;DNMT3B	NM_175849;NM_006892;NM_175848	5'UTR;5'UTR;5'UTR	chr20:31350149-31351263	S_Shore		RDMR	NA		20:31351662-31351861	Unclassified_Cell_type_specific	NA
cg00876267	-0.0192182	0.00614048	0.0019371	62	455	-0.0214539	0.00450289	2.04181e-06	1840	-0.0245504	0.00379674	1.3075e-10	68	0.00439505	2.32458e-08	-0.0222455	0.00279935	-7.94665	1.9162e-15	0.759958	0.00439505	2.32458e-08	9.446e-13	37	9	139588516	9	138708337	F			NA	NA				chr9:139589028-139589256	N_Shore			TRUE		9:139588484-139588736	Unclassified	NA
cg00736984	-0.0165239	0.00602787	0.00652031	62	455	-0.0235141	0.0038786	1.62185e-09	1840	-0.0170741	0.00324967	1.67364e-07	68	0.00376176	5.6561e-06	-0.0195819	0.00246435	-7.94608	1.92501e-15	0.421128	0.00376176	5.6561e-06	9.47897e-13	37	8	145028461	8	145100449	R			NA	NA	PLEC1;PLEC1;PLEC1	NM_201379;NM_000445;NM_201378	TSS1500;Body;Body	chr8:145027911-145028352	S_Shore			NA				NA
cg11751117	-0.0218575	0.00745005	0.00362879	62	455	-0.040655	0.00614722	4.90242e-11	1840	-0.0262826	0.00582458	6.84704e-06	68	0.00674243	9.69535e-05	-0.0308047	0.00387849	-7.94243	1.9826e-15	0.107538	0.00674243	9.69535e-05	9.75179e-13	37	14	56663411	14	55733164	F			NA	NA	PELI2	NM_021255	Body					TRUE				NA
cg16646298	-0.0344701	0.00896173	0.000148934	62	455	-0.027146	0.00593824	5.16731e-06	1840	-0.0325832	0.00532054	1.12887e-09	68	0.00615897	1.22068e-07	-0.0306375	0.00385838	-7.94052	2.0134e-15	0.730374	0.00615897	1.22068e-07	9.8924e-13	37	6	30698987	6	30806966	R			NA	NA	FLOT1	NM_005803	Body					NA		6:30698505-30699531	Promoter_Associated	TRUE
cg10427868	-0.020479	0.00530589	0.000141441	62	455	-0.0215412	0.00367935	5.64885e-09	1840	-0.0148307	0.0032398	5.04073e-06	68	0.00375034	7.66966e-05	-0.0186887	0.00235384	-7.93968	2.02698e-15	0.412065	0.00375034	7.66966e-05	9.94815e-13	37	10	80936798	10	80606804	F	rs7910559		NA	NA	ZMIZ1	NM_020338	5'UTR					TRUE				NA
cg00085438	-0.00813373	0.00719696	0.259389	62	455	-0.0402608	0.00525398	2.92077e-14	1840	-0.0394841	0.00826861	1.94835e-06	68	0.0095716	3.7053e-05	-0.0307987	0.00387936	-7.93912	2.03613e-15	0.000918968	0.0095716	3.7053e-05	9.98206e-13	37	3	152049980	3	153532670	F			NA	NA	MBNL1;MBNL1;MBNL1;MBNL1;MBNL1;MBNL1;MBNL1	NM_207295;NM_207293;NM_021038;NM_207292;NM_207296;NM_207297;NM_207294	Body;Body;Body;Body;Body;Body;Body					TRUE				NA
cg01942816	-0.0156865	0.00528599	0.00326483	62	455	-0.0173922	0.00307488	1.79068e-08	1840	-0.0174556	0.00319203	5.20829e-08	68	0.00369505	2.31191e-06	-0.0171296	0.00215768	-7.93891	2.03963e-15	0.956186	0.00369505	2.31191e-06	9.98826e-13	37	7	5535463	7	5501989	F			NA	NA	MIR589;FBXL18	NR_030318;NM_024963	Body;Body	chr7:5534384-5534766	S_Shore			NA	7:5501812-5502241			NA
cg01076459	-0.0153646	0.00704843	0.0301126	62	455	-0.0294254	0.00461418	2.27554e-10	1840	-0.0253037	0.0048458	1.9883e-07	68	0.00560942	6.45415e-06	-0.0252383	0.00318016	-7.93617	2.08523e-15	0.248339	0.00560942	6.45415e-06	1.02004e-12	37	17	2908230	17	2854980	F			NA	NA	RAP1GAP2;RAP1GAP2	NM_015085;NM_001100398	Body;Body					TRUE	17:2854906-2855120	17:2906861-2908415	Promoter_Associated	NA
cg13896106	-0.0150283	0.00474052	0.00169499	62	455	-0.0157872	0.0036232	1.38963e-05	1840	-0.0219394	0.00316564	5.91746e-12	68	0.00366449	2.13714e-09	-0.0179619	0.00226373	-7.93467	2.1106e-15	0.38264	0.00366449	2.13714e-09	1.03132e-12	37	17	72754589	17	70266184	R			NA	NA	SLC9A3R1	NM_004252	Body					TRUE				TRUE
cg14632941	-0.00150825	0.00679083	0.8244	62	455	-0.0348812	0.0047189	2.18747e-13	1840	-0.0276061	0.0047868	9.54641e-09	68	0.00554112	6.29151e-07	-0.0251937	0.00317562	-7.93346	2.13121e-15	0.000252373	0.00554112	6.29151e-07	1.04025e-12	37	4	42156182	4	41850939	F			NA	NA	BEND4;BEND4	NM_207406;NM_001159547	TSS1500;TSS1500	chr4:42152766-42154984	S_Shore			NA				NA
cg00044466	-0.0198409	0.00674555	0.00354516	62	455	-0.025191	0.00461491	5.44995e-08	1840	-0.0211004	0.00364503	8.41366e-09	68	0.00421943	5.71021e-07	-0.0224145	0.0028273	-7.92787	2.22944e-15	0.739143	0.00421943	5.71021e-07	1.087e-12	37	16	15238525	16	15146026	R			NA	NA								NA	16:15145219-15146112			NA
cg14038878	-0.0180567	0.00705597	0.0110292	62	455	-0.0219318	0.00383101	1.2066e-08	1840	-0.0196135	0.0034712	1.8715e-08	68	0.00401821	1.05458e-06	-0.0204572	0.00258065	-7.92718	2.24187e-15	0.857276	0.00401821	1.05458e-06	1.09187e-12	37	9	86431343	9	85621163	R			NA	NA	GKAP1;GKAP1	NM_025211;NM_001135953	5'UTR;5'UTR	chr9:86431954-86433094	N_Shore			NA				NA
cg17317266	-0.00474141	0.0024562	0.054583	62	455	-0.0150566	0.00219589	9.58593e-12	1840	-0.0119364	0.00219197	5.91418e-08	68	0.00253739	2.54853e-06	-0.0109041	0.0013756	-7.92677	2.24916e-15	0.0066151	0.00253739	2.54853e-06	1.09423e-12	37	19	11495261	19	11356261	R			NA	NA	EPOR	NM_000121	TSS1500	chr19:11493484-11494363	S_Shore			NA				TRUE
cg05118960	-0.007541	0.00923542	0.414901	62	455	-0.0292265	0.00429072	1.30329e-11	1840	-0.0243277	0.00466285	2.03588e-07	68	0.00539764	6.57215e-06	-0.0250179	0.00315652	-7.9258	2.26677e-15	0.102308	0.00539764	6.57215e-06	1.10159e-12	37	3	50359978	3	50334982	F			NA	NA	HYAL2;HYAL2	NM_003773;NM_033158	5'UTR;TSS1500	chr3:50359839-50360042	Island			NA	3:50333411-50335105	3:50358176-50360136	Promoter_Associated	NA
cg20124610	-0.018539	0.0066772	0.00587147	62	455	-0.0306782	0.00523238	5.37132e-09	1840	-0.0244701	0.00442353	3.65962e-08	68	0.0051206	1.76385e-06	-0.0254354	0.00320927	-7.92562	2.27013e-15	0.348845	0.0051206	1.76385e-06	1.10202e-12	37	13	111357885	13	110155886	R			NA	NA	CARS2	NM_024537	Body	chr13:111358080-111358894	N_Shore			NA		13:111357549-111359120	Promoter_Associated	NA
cg21231302	-0.017935	0.00687592	0.0095927	62	455	-0.0285106	0.00471895	1.84075e-09	1840	-0.021767	0.0040663	9.81753e-08	68	0.00470708	3.75838e-06	-0.0237616	0.00299892	-7.92339	2.31124e-15	0.384735	0.00470708	3.75838e-06	1.12076e-12	37	9	140116093	9	139235914	R			NA	NA	RNF208	NM_031297	TSS1500	chr9:140115986-140118466	Island			NA	9:139235914-139238287			NA
cg20379593	-0.00807853	0.00576819	0.162478	62	455	-0.0242785	0.00372543	9.23576e-11	1840	-0.02163	0.00381993	1.74691e-08	68	0.00442189	1.00029e-06	-0.0202175	0.00255446	-7.91461	2.48039e-15	0.0572941	0.00442189	1.00029e-06	1.20148e-12	37	11	65198023	11	64954599	F		rs36123650	NA	NA						low-CpG:64954074-64954780		NA				NA
cg07134316	-0.0326794	0.0092825	0.00050364	62	455	-0.0296992	0.0061309	1.37786e-06	1840	-0.0365812	0.00604569	1.76634e-09	68	0.00699839	1.72199e-07	-0.0326859	0.00412999	-7.91427	2.48717e-15	0.760662	0.00699839	1.72199e-07	1.20346e-12	37	12	57488112	12	55774379	F			NA	NA	NAB2	NM_005967	Body					TRUE		12:57486290-57488226	Promoter_Associated	TRUE
cg20346503	-0.0163983	0.00463625	0.000474609	62	455	-0.0307055	0.00439496	3.92392e-12	1840	-0.0141594	0.00400082	0.000412181	68	0.00463129	0.00223316	-0.0207892	0.00262688	-7.91403	2.49194e-15	0.0179796	0.00463129	0.00223316	1.20446e-12	37	2	128994402	2	128710872	R			NA	NA				chr2:128990509-128991325	S_Shelf			TRUE				TRUE
cg26188726	-0.0118783	0.00986052	0.229376	62	455	-0.0387511	0.00577881	2.65784e-11	1840	-0.0335402	0.00621122	7.59995e-08	68	0.00719001	3.08872e-06	-0.0324197	0.00409707	-7.91291	2.51448e-15	0.0619031	0.00719001	3.08872e-06	1.21404e-12	37	16	31225957	16	31133458	R			NA	NA	TRIM72	NM_001008274	5'UTR	chr16:31225956-31228264	Island			NA				NA
cg21552014	-0.0178862	0.00590935	0.00270534	62	455	-0.0340489	0.00519736	7.38726e-11	1840	-0.01937	0.004151	3.3042e-06	68	0.00480513	5.55136e-05	-0.023967	0.00302938	-7.91152	2.54256e-15	0.0567849	0.00480513	5.55136e-05	1.22627e-12	37	3	146026497	3	147509187	R			NA	NA								TRUE				NA
cg26132737	-0.0317457	0.010529	0.00280826	62	455	-0.0448112	0.00692041	1.21134e-10	1840	-0.0305649	0.00715484	2.04436e-05	68	0.00828233	0.000223919	-0.0374922	0.00474159	-7.90709	2.63471e-15	0.347162	0.00828233	0.000223919	1.26934e-12	37	2	198029141	2	197737386	R			NA	NA	ANKRD44	NM_153697	Body	chr2:198029068-198029438	Island			TRUE	2:197737203-197737644			NA
cg24146100	-0.0342164	0.0110425	0.00214504	62	455	-0.0443517	0.00676984	7.37853e-11	1840	-0.0318259	0.00815348	9.85481e-05	68	0.00943834	0.000746308	-0.0389274	0.0049239	-7.90581	2.66194e-15	0.499043	0.00943834	0.000746308	1.28087e-12	37	13	99737448	13	98535449	R			NA	NA	DOCK9;DOCK9	NM_015296;NM_001130049	Body;Body	chr13:99738331-99740225	N_Shore		RDMR	NA				NA
cg06557644	-0.0202406	0.00690975	0.00368111	62	455	-0.0275882	0.00456864	1.87603e-09	1840	-0.0234898	0.00474105	7.96518e-07	68	0.00548816	1.86826e-05	-0.024747	0.00313027	-7.9057	2.66439e-15	0.649025	0.00548816	1.86826e-05	1.28087e-12	37	7	30510463	7	30476988	F			NA	NA	NOD1	NM_006092	5'UTR					TRUE				NA
cg07338715	-0.0162129	0.00728129	0.0267776	62	455	-0.0252385	0.00415366	1.49207e-09	1840	-0.0208833	0.00385396	6.85674e-08	68	0.00446128	2.85444e-06	-0.0221766	0.00280533	-7.90518	2.6755e-15	0.522503	0.00446128	2.85444e-06	1.28483e-12	37	2	109649281	2	109015713	R			NA	NA				chr2:109647955-109648230	S_Shore		RDMR	NA				NA
cg02812767	-0.023729	0.00878713	0.00735306	62	455	-0.0338065	0.00595329	1.5748e-08	1840	-0.0317649	0.00561812	1.83292e-08	68	0.00650345	1.03786e-06	-0.0310479	0.00392807	-7.90411	2.69846e-15	0.63109	0.00650345	1.03786e-06	1.29446e-12	37	15	74218468	15	72005521	F			NA	NA	LOXL1	NM_005576	TSS1500	chr15:74218696-74220373	N_Shore			NA		15:74218389-74218530	Unclassified_Cell_type_specific	NA
cg11789321	-0.015554	0.00665428	0.0201308	62	455	-0.0278572	0.00473912	4.91515e-09	1840	-0.0258349	0.00448448	9.8963e-09	68	0.00519116	6.46775e-07	-0.024471	0.00309764	-7.8999	2.79131e-15	0.304945	0.00519116	6.46775e-07	1.33756e-12	37	5	56773063	5	56808820	R			NA	NA								TRUE				NA
cg12635790	-0.0209587	0.00691045	0.00265265	62	455	-0.0297431	0.00476111	5.18177e-10	1840	-0.0237592	0.00522142	5.73293e-06	68	0.00604423	8.46335e-05	-0.0259808	0.00328926	-7.89866	2.8192e-15	0.525269	0.00604423	8.46335e-05	1.34948e-12	37	8	96112814	8	96181990	F			NA	NA								TRUE		8:96112610-96112833	Unclassified_Cell_type_specific	NA
cg19790323	-0.0291549	0.0107016	0.00685426	62	455	-0.0436355	0.00608456	1.07005e-12	1840	-0.0248548	0.00819636	0.00246241	68	0.00948797	0.00880294	-0.0364838	0.00461997	-7.89698	2.85741e-15	0.18705	0.00948797	0.00880294	1.36631e-12	37	14	22471111	14	21540951	R			NA	NA								NA		14:22471049-22471396	Unclassified_Cell_type_specific	NA
cg02351713	-0.0184999	0.00953501	0.0533734	62	455	-0.0328629	0.00585272	2.26567e-08	1840	-0.036031	0.00574181	4.41306e-10	68	0.00664662	5.9284e-08	-0.0314898	0.00398953	-7.89311	2.94749e-15	0.304552	0.00664662	5.9284e-08	1.40787e-12	37	6	73329475	6	73386196	R			NA	NA				chr6:73330942-73333109	N_Shore			NA				NA
cg07573985	-0.0298034	0.00583443	6.07594e-07	62	455	-0.0228448	0.0046856	1.17833e-06	1840	-0.0171144	0.00376298	5.79316e-06	68	0.00435596	8.53131e-05	-0.0220802	0.00279916	-7.88815	3.0671e-15	0.214544	0.00435596	8.53131e-05	1.46343e-12	37	6	33386467	6	33494445	R			NA	NA	CUTA;CUTA;SYNGAP1;CUTA;CUTA;CUTA	NM_015921;NM_001014837;NM_006772;NM_001014838;NM_001014840;NM_001014433	TSS1500;TSS1500;TSS1500;TSS1500;TSS1500;TSS1500	chr6:33385678-33386262	S_Shore			NA		6:33385034-33386783	Promoter_Associated	NA
cg13850871	-0.0144846	0.00536447	0.00736011	62	455	-0.0232121	0.00384152	1.83292e-09	1840	-0.0155172	0.00291017	1.10014e-07	68	0.00336877	4.10105e-06	-0.0180643	0.00229037	-7.88707	3.09362e-15	0.245038	0.00336877	4.10105e-06	1.47451e-12	37	9	139583773	9	138703594	F			NA	NA				chr9:139580969-139582615	S_Shore			NA				NA
cg07819892	-0.0126538	0.0071586	0.0782276	62	455	-0.0205707	0.00306568	2.58316e-11	1840	-0.017717	0.00392875	6.93691e-06	68	0.00454786	9.79258e-05	-0.0188924	0.0023955	-7.88661	3.10497e-15	0.569505	0.00454786	9.79258e-05	1.4783e-12	37	19	35715940	19	40407780	F			NA	NA	FAM187B	NM_152481	Body	chr19:35715623-35716120	Island			TRUE	19:40407532-40407952			NA
cg19008597	-0.015715	0.00820865	0.0565965	62	455	-0.0365757	0.00613176	2.92751e-09	1840	-0.0390909	0.00633952	8.70474e-10	68	0.00733853	9.99578e-08	-0.0321947	0.00408227	-7.88648	3.1082e-15	0.0664039	0.00733853	9.99578e-08	1.4783e-12	37	12	25102431	12	24993698	R			NA	NA	BCAT1	NM_005504	TSS200	chr12:25101607-25102073	S_Shore			NA		12:25101345-25102494	Promoter_Associated	NA
cg19414967	-0.0288915	0.0117267	0.0143597	62	455	-0.0388	0.00658561	4.53668e-09	1840	-0.0348792	0.00644979	7.27855e-08	68	0.00746617	2.9881e-06	-0.03585	0.00455164	-7.87629	3.37258e-15	0.752136	0.00746617	2.9881e-06	1.60233e-12	37	8	49468296	8	49630849	F			NA	NA				chr8:49468683-49468959	N_Shore		RDMR	TRUE	8:49630705-49630925			NA
cg20277282	-0.0076223	0.00249303	0.00245141	62	455	-0.00364848	0.000624378	6.03615e-09	1840	-0.00370453	0.000699236	1.32263e-07	68	0.000809424	4.7227e-06	-0.00381895	0.000484938	-7.87513	3.4039e-15	0.297907	0.000809424	4.7227e-06	1.61549e-12	37	4	8230053	4	8280953	R			NA	NA	SH3TC1	NM_018986	Body					TRUE	4:8279878-8281265	4:8229970-8231542	Unclassified	TRUE
cg20964856	-0.0209673	0.00685825	0.00245295	62	455	-0.0217242	0.00387066	2.29727e-08	1840	-0.0189104	0.0035335	9.88557e-08	68	0.00409032	3.77833e-06	-0.0204773	0.00260133	-7.87184	3.49467e-15	0.880017	0.00409032	3.77833e-06	1.65681e-12	37	19	41767669	19	46459509	R			NA	NA	HNRNPUL1;AXL;AXL	NM_144732;NM_021913;NM_001699	TSS1500;3'UTR;3'UTR	chr19:41769215-41769417	N_Shore		RDMR	NA		19:41767515-41770646	Promoter_Associated	NA
cg15200445	-0.020219	0.00801554	0.0122156	62	455	-0.033767	0.00486891	5.59503e-12	1840	-0.0200301	0.00509411	8.75923e-05	68	0.00589685	0.000681921	-0.0267627	0.00339999	-7.87138	3.50748e-15	0.13269	0.00589685	0.000681921	1.66112e-12	37	19	3698926	19	3649926	R			NA	NA	PIP5K1C	NM_012398	Body	chr19:3699950-3700616	N_Shore	low-CpG:3649924-3649929		TRUE				NA
cg26467918	-0.00336824	0.00315702	0.286948	62	455	-0.0169061	0.00226679	1.34444e-13	1840	-0.0112921	0.0023372	1.47607e-06	68	0.0027055	2.99599e-05	-0.0119816	0.00152222	-7.87113	3.51442e-15	0.00221141	0.0027055	2.99599e-05	1.66123e-12	37	11	63932088	11	63688664	R			NA	NA	MACROD1	NM_014067	Body	chr11:63932990-63934070	N_Shore			NA		11:63932017-63932173	Unclassified_Cell_type_specific	TRUE
cg09719269	-0.0277532	0.00896533	0.00216607	62	455	-0.0347605	0.00578611	2.26423e-09	1840	-0.0243863	0.00497531	1.04119e-06	68	0.00575934	2.29353e-05	-0.0292409	0.00371497	-7.87111	3.51515e-15	0.43866	0.00575934	2.29353e-05	1.66123e-12	37	12	125033803	12	123599756	R			NA	NA								TRUE	12:123599624-123600303			TRUE
cg16402875	-0.0180841	0.00481342	0.00020979	62	455	-0.017362	0.00357013	1.25382e-06	1840	-0.0157225	0.0027545	1.34518e-08	68	0.00318857	8.18564e-07	-0.0167706	0.00213213	-7.86567	3.67125e-15	0.900344	0.00318857	8.18564e-07	1.73316e-12	37	7	29229717	7	29196242	R			NA	NA				chr7:29233704-29235046	N_Shelf			NA		7:29228464-29230305	Unclassified	TRUE
cg10383568	-0.0146695	0.00614547	0.0176577	62	455	-0.0247253	0.00449915	4.43867e-08	1840	-0.0276244	0.00445268	6.8863e-10	68	0.00515435	8.34767e-08	-0.0233411	0.002968	-7.86424	3.71331e-15	0.249537	0.00515435	8.34767e-08	1.75116e-12	37	11	6589761	11	6546337	F			NA	NA	DNHD1	NM_144666	Body	chr11:6591960-6592795	N_Shelf			NA				TRUE
cg21810733	-0.00699349	0.00451431	0.122483	62	455	-0.0185753	0.00296789	4.81638e-10	1840	-0.0144677	0.0025088	9.56538e-09	68	0.00290414	6.30111e-07	-0.0148218	0.0018859	-7.85928	3.86339e-15	0.0991894	0.00290414	6.30111e-07	1.82001e-12	37	3	13520763	3	13495763	F			NA	NA	HDAC11;HDAC11	NM_001136041;NM_024827	TSS1500;TSS1500	chr3:13520912-13521319	N_Shore			NA				NA
cg02538891	-0.0183396	0.00644287	0.00475204	62	455	-0.0189809	0.00420308	6.70325e-06	1840	-0.022836	0.00339325	2.30953e-11	68	0.00392798	6.1117e-09	-0.0205919	0.00262153	-7.85491	4.00056e-15	0.742484	0.00392798	6.1117e-09	1.88265e-12	37	9	139549426	9	138669247	F			NA	NA				chr9:139551254-139551559	N_Shore			NA				NA
cg16836311	-0.0336036	0.011862	0.00495305	62	455	-0.0475098	0.00714134	3.78163e-11	1840	-0.0323085	0.00825811	9.49807e-05	68	0.00955945	0.000725536	-0.0404681	0.00515312	-7.85313	4.0578e-15	0.361362	0.00955945	0.000725536	1.90757e-12	37	1	25944712	1	25817299	F	rs11247857		NA	NA	MAN1C1	NM_020379	1stExon	chr1:25944099-25944772	Island			NA	1:25815101-25817340			NA
cg23336905	-0.00764098	0.00469362	0.104677	62	455	-0.0186628	0.00360844	2.5685e-07	1840	-0.0174349	0.00250238	4.58967e-12	68	0.00289671	1.75639e-09	-0.0159837	0.00203545	-7.8527	4.07181e-15	0.137959	0.00289671	1.75639e-09	1.91214e-12	37	5	35803436	5	35839193	R			NA	NA	SPEF2	NM_024867	Body					TRUE		5:35803311-35803465	Unclassified_Cell_type_specific	NA
cg04462378	-0.0135144	0.00773202	0.0816015	62	455	-0.0348313	0.00589323	4.05767e-09	1840	-0.0385993	0.00605249	2.31074e-10	68	0.00700626	3.60355e-08	-0.0305849	0.00389568	-7.85097	4.12838e-15	0.0350511	0.00700626	3.60355e-08	1.93667e-12	37	11	71749760	11	71427408	F			NA	NA	NUMA1	NM_006185	5'UTR					TRUE				TRUE
cg11086127	-0.0118445	0.00365703	0.00134701	62	455	-0.0207223	0.00400813	2.59485e-07	1840	-0.0160038	0.0026567	2.079e-09	68	0.00307535	1.95171e-07	-0.0159325	0.00202964	-7.84994	4.16232e-15	0.262083	0.00307535	1.95171e-07	1.95054e-12	37	20	2902436	20	2850436	F			NA	NA	PTPRA;PTPRA;PTPRA	NM_080841;NM_002836;NM_080840	TSS1500;5'UTR;5'UTR					NA				NA
cg27241845	-0.0203001	0.00774913	0.00928886	62	455	-0.0355394	0.00603162	4.52181e-09	1840	-0.0304168	0.00554807	4.82106e-08	68	0.00642236	2.17895e-06	-0.0300122	0.00382402	-7.84834	4.21596e-15	0.299015	0.00642236	2.17895e-06	1.9736e-12	37	2	233250370	2	232958614	R			NA	NA				chr2:233251361-233253414	N_Shore		RDMR	NA	2:232958612-232959030			TRUE
cg24761525	-0.0240245	0.0103533	0.0210448	62	455	-0.0415866	0.00612149	1.47244e-11	1840	-0.0255358	0.00590578	1.62136e-05	68	0.00683643	0.00018752	-0.032751	0.00417349	-7.84737	4.24837e-15	0.141735	0.00683643	0.00018752	1.98669e-12	37	17	46651745	17	44006744	R			NA	NA	HOXB3;HOXB3	NM_002146;NM_002146	5'UTR;1stExon	chr17:46654053-46654369	N_Shelf			NA	17:44006630-44006822			NA
cg11218561	-0.0142064	0.00604167	0.0194063	62	455	-0.0131112	0.00232161	1.88268e-08	1840	-0.0160366	0.00278868	1.0508e-08	68	0.00322813	6.77239e-07	-0.0141172	0.00179928	-7.84603	4.29418e-15	0.762798	0.00322813	6.77239e-07	2.00601e-12	37	11	1050743	11	1040743	R			NA	NA								NA	11:1040719-1040953	11:1050673-1052607	Unclassified_Cell_type_specific	NA
cg26403608	-0.0270153	0.00924117	0.00374971	62	455	-0.0298005	0.00536389	3.1674e-08	1840	-0.0292	0.00535344	5.62936e-08	68	0.00619705	2.4539e-06	-0.029135	0.00371375	-7.84517	4.32374e-15	0.966515	0.00619705	2.4539e-06	2.01771e-12	37	17	2319719	17	2266469	R			NA	NA	LOC284009;METT10D	NR_028335;NM_024086	TSS1500;3'UTR					NA		17:2319074-2320255	Unclassified	NA
cg20664247	-0.0360864	0.00832262	2.03633e-05	62	455	-0.0272845	0.00537031	4.1433e-07	1840	-0.0279874	0.00573527	1.16005e-06	68	0.00663905	2.49139e-05	-0.0292765	0.00373201	-7.84471	4.33963e-15	0.655471	0.00663905	2.49139e-05	2.02202e-12	37	1	2345475	1	2335335	R			NA	TRUE	PEX10;PEX10	NM_002617;NM_153818	TSS1500;TSS1500	chr1:2345891-2346156	N_Shore			NA		1:2344997-2348677	Promoter_Associated	NA
cg03284879	-0.00627014	0.00728829	0.390368	62	455	-0.0243289	0.00320975	5.4571e-14	1840	-0.0125737	0.00312644	6.02837e-05	68	0.00361911	0.000512295	-0.0178918	0.00228077	-7.84464	4.34204e-15	0.0127532	0.00361911	0.000512295	2.02202e-12	37	3	193894498	3	195377192	F			NA	NA								TRUE				NA
cg06241901	-0.0301481	0.00927855	0.0013005	62	455	-0.0275746	0.00636416	1.55171e-05	1840	-0.0340577	0.00514033	4.61785e-11	68	0.00595036	1.04267e-08	-0.0308744	0.00393602	-7.84407	4.36182e-15	0.755341	0.00595036	1.04267e-08	2.02911e-12	37	6	43244304	6	43352282	F			NA	NA	TTBK1	NM_032538	Body	chr6:43243593-43244305	Island			NA	6:43351572-43352283			NA
cg15393490	-0.0258015	0.00784776	0.00114075	62	455	-0.0348125	0.00524004	4.02009e-11	1840	-0.0186712	0.00487137	0.000131246	68	0.00563902	0.000929385	-0.0270374	0.00344819	-7.84104	4.46828e-15	0.109286	0.00563902	0.000929385	2.07647e-12	37	1	207996459	1	206063082	R			NA	NA							CDMR	TRUE		1:207995893-207996505	Promoter_Associated	TRUE
cg26364091	-0.0068691	0.0048805	0.160417	62	455	-0.0223389	0.00354358	3.62101e-10	1840	-0.0162592	0.00273583	3.38181e-09	68	0.00316695	2.83615e-07	-0.0166656	0.00212561	-7.84036	4.4925e-15	0.0367211	0.00316695	2.83615e-07	2.08555e-12	37	22	41633219	22	39963165	F			NA	NA	CHADL	NM_138481	Body	chr22:41633520-41634842	N_Shore			NA				TRUE
cg15393221	-0.0157596	0.00860465	0.0681009	62	455	-0.0397969	0.00574362	5.8444e-12	1840	-0.0227633	0.00473933	1.69883e-06	68	0.00548617	3.33631e-05	-0.0282374	0.00360272	-7.83779	4.58542e-15	0.0280296	0.00548617	3.33631e-05	2.12648e-12	37	19	40919485	19	45611325	F	rs34366758		NA	NA	PRX;PRX	NM_020956;NM_181882	TSS1500;TSS1500					TRUE				NA
cg04330176	-0.0182905	0.00554915	0.00110867	62	455	-0.0241495	0.00452475	1.06076e-07	1840	-0.0219011	0.00396894	3.95107e-08	68	0.00459438	1.87059e-06	-0.0218433	0.00278754	-7.83605	4.64932e-15	0.715396	0.00459438	1.87059e-06	2.15387e-12	37	10	105619211	10	105609201	F			NA	NA				chr10:105614511-105615456	S_Shelf			NA		10:105618986-105619343	Unclassified_Cell_type_specific	TRUE
cg16725944	-0.0223367	0.0062414	0.000407614	62	455	-0.0182904	0.00417898	1.2721e-05	1840	-0.0188692	0.00298966	3.51104e-10	68	0.00346078	4.97212e-08	-0.0192049	0.00245127	-7.8347	4.69969e-15	0.856811	0.00346078	4.97212e-08	2.17495e-12	37	12	133215533	12	131725606	F			NA	NA	POLE	NM_006231	Body					TRUE		12:133215368-133215671	Gene_Associated	TRUE
cg03485669	-0.0160767	0.00728833	0.0282214	62	455	-0.0281951	0.00484152	6.78169e-09	1840	-0.0278111	0.00483066	1.01139e-08	68	0.00559189	6.57663e-07	-0.0256229	0.00327092	-7.83354	4.74324e-15	0.341138	0.00559189	6.57663e-07	2.19283e-12	37	8	13016635	8	13061006	R			NA	NA	DLC1	NM_182643	Body					TRUE				NA
cg00350448	-0.00808457	0.00387235	0.0377354	62	455	-0.0182115	0.00316271	9.94205e-09	1840	-0.0149722	0.00244523	1.13593e-09	68	0.00283055	1.22654e-07	-0.0145074	0.00185225	-7.83227	4.79124e-15	0.125575	0.00283055	1.22654e-07	2.21273e-12	37	11	72433866	11	72111514	F			NA	NA	ARAP1;ARAP1;ARAP1	NM_001040118;NM_001135190;NM_015242	Body;TSS1500;TSS1500	chr11:72437676-72438005	N_Shelf			NA		11:72432591-72434003	Promoter_Associated	NA
cg19510472	-0.0289098	0.00703032	5.17603e-05	62	455	-0.0294284	0.00523519	2.18613e-08	1840	-0.0199318	0.00448525	9.40221e-06	68	0.00519205	0.000123583	-0.0255615	0.00326486	-7.82927	4.90697e-15	0.377553	0.00519205	0.000123583	2.26383e-12	37	19	14142205	19	14003205	R			NA	NA	IL27RA	NM_004843	TSS200	chr19:14142398-14142977	N_Shore			NA		19:14141765-14143437	Promoter_Associated	NA
cg13223043	-0.01904	0.00642778	0.00332114	62	455	-0.026268	0.00467702	2.24742e-08	1840	-0.0223727	0.00413412	7.12425e-08	68	0.00478559	2.93942e-06	-0.0232303	0.00296717	-7.82911	4.91345e-15	0.644377	0.00478559	2.93942e-06	2.26448e-12	37	1	26492308	1	26364895	F			NA	NA				chr1:26490522-26491015	S_Shore			NA				NA
cg12186702	-0.0178953	0.00659778	0.00710089	62	455	-0.0265658	0.00393867	2.04438e-11	1840	-0.0151766	0.00370971	4.49365e-05	68	0.0042943	0.000409124	-0.0208	0.0026569	-7.82869	4.92976e-15	0.131886	0.0042943	0.000409124	2.26965e-12	37	19	17487908	19	17348908	F			NA	NA	PLVAP	NM_031310	1stExon	chr19:17487895-17488125	Island			NA	19:17348766-17349550			NA
cg26927807	-0.0237475	0.00596957	8.88286e-05	62	455	-0.0225728	0.00385884	5.81742e-09	1840	-0.0148195	0.00345827	1.92692e-05	68	0.00400324	0.000214008	-0.0197125	0.00251883	-7.82606	5.03402e-15	0.286473	0.00400324	0.000214008	2.31526e-12	37	19	2016532	19	1967532	F			NA	TRUE	BTBD2	NM_017797	TSS1500					NA				NA
cg02565062	-0.00404809	0.0049014	0.409571	62	455	-0.0255481	0.00338773	7.26367e-14	1840	-0.0139099	0.00284101	1.0696e-06	68	0.00328871	2.34127e-05	-0.0166383	0.00212613	-7.82559	5.05267e-15	0.000823678	0.00328871	2.34127e-05	2.32144e-12	37	1	855544	1	845407	R			NA	NA	FLJ39609	NR_026874	TSS1500	chr1:854765-854973	S_Shore			NA	1:845267-845605	1:855232-855686	Unclassified	NA
cg02988730	-0.0156329	0.00472003	0.00104967	62	455	-0.0226512	0.0043382	1.97735e-07	1840	-0.0218556	0.00382247	1.27171e-08	68	0.00442483	7.84036e-07	-0.0202658	0.00258981	-7.82521	5.06809e-15	0.497865	0.00442483	7.84036e-07	2.32586e-12	37	1	110167509	1	109969032	R			NA	NA	AMPD2;AMPD2;AMPD2	NM_139156;NM_004037;NM_203404	Body;Body;TSS1500					TRUE		1:110167006-110167563	Promoter_Associated_Cell_type_specific	NA
cg10513302	-0.0203525	0.00508581	8.08116e-05	62	455	-0.0148887	0.0032557	5.12537e-06	1840	-0.0169255	0.00291652	7.72889e-09	68	0.00337611	5.35e-07	-0.0166552	0.00212844	-7.8251	5.07271e-15	0.660565	0.00337611	5.35e-07	2.32586e-12	37	6	30698905	6	30806884	F		rs74956736	NA	NA	FLOT1	NM_005803	Body					NA		6:30698505-30699531	Promoter_Associated	TRUE
cg09198200	-0.0173783	0.0059256	0.00364154	62	455	-0.0198451	0.00390108	4.00659e-07	1840	-0.0200975	0.00334781	2.35653e-09	68	0.00387536	2.14894e-07	-0.0195127	0.00249397	-7.82393	5.11975e-15	0.92322	0.00387536	2.14894e-07	2.34502e-12	37	2	208123481	2	207831726	R			NA	NA								TRUE				TRUE
cg00081324	-0.0118521	0.00457085	0.0100223	62	455	-0.0206283	0.00353773	6.49536e-09	1840	-0.0144084	0.00257923	2.69274e-08	68	0.00298567	1.39405e-06	-0.0159697	0.00204148	-7.82261	5.17407e-15	0.244264	0.00298567	1.39405e-06	2.36747e-12	37	17	48201233	17	45556232	F			NA	NA	SAMD14	NM_174920	Body					TRUE				TRUE
cg21472642	-0.0246487	0.00697928	0.000483757	62	455	-0.0305502	0.0052417	6.59682e-09	1840	-0.0254733	0.00561644	6.14611e-06	68	0.00650149	8.92629e-05	-0.0275562	0.00352271	-7.82245	5.18045e-15	0.739914	0.00650149	8.92629e-05	2.36796e-12	37	7	29233468	7	29199993	R			NA	TRUE	CHN2	NM_004067	TSS1500	chr7:29233704-29235046	N_Shore		RDMR	NA	7:29199993-29201519			NA
cg18241877	-0.00928364	0.00586088	0.114339	62	455	-0.0247142	0.00402558	1.01282e-09	1840	-0.0206436	0.00351695	5.22924e-09	68	0.00407116	3.9636e-07	-0.0201175	0.00257211	-7.82141	5.2234e-15	0.0935949	0.00407116	3.9636e-07	2.38515e-12	37	12	120706015	12	119190398	R			NA	NA				chr12:120702976-120703541	S_Shelf			NA				NA
cg15869022	-0.00630891	0.00928916	0.4976	62	455	-0.0445438	0.00673525	4.9034e-11	1840	-0.0423405	0.00674944	4.46911e-10	68	0.00781304	5.98624e-08	-0.0349627	0.00447147	-7.81906	5.32213e-15	0.00199886	0.00781304	5.98624e-08	2.42775e-12	37	2	128404486	2	128120956	F			NA	TRUE	GPR17;GPR17;LIMS2;LIMS2;LIMS2;GPR17;LIMS2;LIMS2;GPR17	NM_005291;NM_001161415;NM_001136037;NM_001161403;NM_017980;NM_001161416;NM_001161404;NR_027823;NM_001161417	5'UTR;5'UTR;Body;Body;Body;5'UTR;Body;Body;5'UTR					NA				NA
cg21613389	-0.011889	0.00729065	0.10409	62	455	-0.026179	0.00434132	1.97438e-09	1840	-0.0263616	0.00452579	6.81663e-09	68	0.00523897	4.85826e-07	-0.0237582	0.0030386	-7.81879	5.33331e-15	0.201063	0.00523897	4.85826e-07	2.43036e-12	37	17	2807593	17	2754343	R			NA	NA	RAP1GAP2;RAP1GAP2	NM_015085;NM_001100398	Body;Body					TRUE		17:2807561-2807691	Unclassified_Cell_type_specific	NA
cg09496748	-0.0158132	0.00756857	0.0375945	62	455	-0.0350658	0.00497845	2.63805e-12	1840	-0.0223305	0.00545494	4.44449e-05	68	0.00631455	0.000405695	-0.0271572	0.00347349	-7.81843	5.3487e-15	0.0687575	0.00631455	0.000405695	2.43488e-12	37	2	198029215	2	197737460	R			NA	NA	ANKRD44	NM_153697	Body	chr2:198029068-198029438	Island			TRUE	2:197737203-197737644			NA
cg06376402	-0.0156881	0.0049471	0.00168938	62	455	-0.032893	0.00670316	1.00587e-06	1840	-0.0355941	0.00520461	1.10613e-11	68	0.00602477	3.4636e-09	-0.0259601	0.00332107	-7.81678	5.41932e-15	0.0188922	0.00602477	3.4636e-09	2.46452e-12	37	10	134404945	10	134254935	F			NA	NA	INPP5A	NM_005539	Body					TRUE	10:134254853-134254936			TRUE
cg19430473	-0.049915	0.00866312	2.21962e-08	62	455	-0.0316893	0.0062834	5.02503e-07	1840	-0.0210638	0.00599557	0.000454193	68	0.00694038	0.00240563	-0.0320639	0.00410259	-7.81555	5.47248e-15	0.0340201	0.00694038	0.00240563	2.48616e-12	37	3	156468708	3	157951402	R			NA	NA								TRUE				NA
cg24869232	-0.0252678	0.00772795	0.00121334	62	455	-0.0246713	0.00518059	2.0642e-06	1840	-0.0307586	0.00498977	8.80619e-10	68	0.00577607	1.00852e-07	-0.0269629	0.00345079	-7.81356	5.55948e-15	0.713329	0.00577607	1.00852e-07	2.52312e-12	37	2	109154811	2	108521243	F			NA	NA				chr2:109150330-109151301	S_Shelf			NA				NA
cg16104276	-0.0142427	0.00626217	0.023709	62	455	-0.0351428	0.00554968	3.02593e-10	1840	-0.0253868	0.00467636	6.48702e-08	68	0.00541327	2.7357e-06	-0.0257406	0.0032952	-7.81153	5.64977e-15	0.0440309	0.00541327	2.7357e-06	2.56149e-12	37	1	44880317	1	44652904	R			NA	NA	RNF220	NM_018150	Body	chr1:44883136-44884272	N_Shelf			NA				NA
cg24067118	-0.0329523	0.0117283	0.00531425	62	455	-0.0444414	0.00715128	6.3539e-10	1840	-0.0330466	0.00717366	4.39424e-06	68	0.00830412	6.90491e-05	-0.0384217	0.00491917	-7.8106	5.69162e-15	0.510422	0.00830412	6.90491e-05	2.57784e-12	37	10	102806933	10	102796923	F			NA	NA				chr10:102807774-102808271	N_Shore		RDMR	NA	10:102796791-102796924			NA
cg12577411	-0.0277073	0.00758366	0.000309464	62	455	-0.0255164	0.00517644	8.9915e-07	1840	-0.0261357	0.00466686	2.48856e-08	68	0.00540229	1.31224e-06	-0.0261831	0.00335254	-7.80993	5.72196e-15	0.971873	0.00540229	1.31224e-06	2.58895e-12	37	6	15551489	6	15659468	F			NA	NA	DTNBP1;DTNBP1;DTNBP1	NM_183041;NM_183040;NM_032122	Body;Body;Body					TRUE				NA
cg03010972	-0.0102583	0.00619322	0.0987817	62	455	-0.0217957	0.00325815	2.95993e-11	1840	-0.0120325	0.00235112	3.43909e-07	68	0.00272162	9.82016e-06	-0.0154541	0.00197922	-7.80818	5.80203e-15	0.0480082	0.00272162	9.82016e-06	2.62252e-12	37	7	130920239	7	130570779	F		rs74406960	NA	NA	MKLN1	NM_001145354	Body					TRUE				NA
cg22367264	-0.0137425	0.00649869	0.0353558	62	455	-0.0301967	0.00414463	4.72386e-13	1840	-0.018122	0.00519665	0.000500347	68	0.00601556	0.00259089	-0.023593	0.00302162	-7.80805	5.80793e-15	0.0589142	0.00601556	0.00259089	2.62253e-12	37	12	80749665	12	79273796	F			NA	TRUE								NA				NA
cg13655803	-0.00637914	0.00930561	0.493594	62	455	-0.0391525	0.00560404	3.9246e-12	1840	-0.0271117	0.00511452	1.30176e-07	68	0.00592049	4.66549e-06	-0.0291137	0.00372888	-7.80761	5.82804e-15	0.0095996	0.00592049	4.66549e-06	2.62895e-12	37	17	48912764	17	46267763	F			NA	NA	WFIKKN2;WFIKKN2	NM_175575;NM_175575	1stExon;5'UTR					NA	17:46267446-46268031			NA
cg27646484	-0.0123274	0.00526229	0.0198608	62	455	-0.022034	0.00375585	5.26309e-09	1840	-0.0194001	0.0034719	2.67129e-08	68	0.00401902	1.38553e-06	-0.0189934	0.00243316	-7.80608	5.89929e-15	0.321376	0.00401902	1.38553e-06	2.6584e-12	37	16	31210736	16	31118237	F			NA	NA				chr16:31213566-31214287	N_Shelf			NA				NA
cg01264729	-0.0173484	0.00665582	0.00964403	62	455	-0.0241272	0.00472784	3.68372e-07	1840	-0.0292482	0.0046097	2.84148e-10	68	0.00533612	4.22508e-08	-0.0243891	0.00312453	-7.80569	5.91757e-15	0.376956	0.00533612	4.22508e-08	2.66395e-12	37	16	14622974	16	14530475	R			NA	NA	PARN;PARN	NM_001134477;NM_002582	Body;Body					TRUE		16:14622697-14623846	Unclassified	TRUE
cg13980944	-0.0142592	0.00695514	0.0412933	62	455	-0.02889	0.00483508	2.75461e-09	1840	-0.0219606	0.00386234	1.52744e-08	68	0.00447098	9.02389e-07	-0.0231697	0.00296861	-7.8049	5.95476e-15	0.210753	0.00447098	9.02389e-07	2.67799e-12	37	9	138860330	9	138000151	R			NA	NA								TRUE		9:138858736-138860473	Unclassified	NA
cg01622018	-0.0181348	0.00645181	0.00529572	62	455	-0.0249372	0.004986	6.23174e-07	1840	-0.026367	0.00422508	5.48153e-10	68	0.00489088	7.00431e-08	-0.0239599	0.0030707	-7.80274	6.05766e-15	0.578157	0.00489088	7.00431e-08	2.72152e-12	37	17	34122943	17	31147056	R			NA	NA	MMP28;MMP28	NM_001032278;NM_024302	TSS1500;TSS1500	chr17:34122024-34122801	S_Shore			NA		17:34121801-34122948	Unclassified_Cell_type_specific	TRUE
cg18448426	-0.0195777	0.00644092	0.00259637	62	455	-0.0181762	0.00402618	6.74847e-06	1840	-0.0281234	0.00417341	2.1758e-11	68	0.00483107	5.83693e-09	-0.0217519	0.00278811	-7.80167	6.10929e-15	0.266856	0.00483107	5.83693e-09	2.74196e-12	37	22	36648832	22	34978778	R			NA	NA	APOL1;APOL1;APOL1;APOL1	NM_003661;NM_001136541;NM_145343;NM_001136540	TSS1500;TSS1500;TSS1500;TSS1500					NA		22:36648819-36649508	Unclassified	NA
cg10422709	-0.0267543	0.00980469	0.00676623	62	455	-0.0363831	0.00641513	1.64098e-08	1840	-0.033006	0.0060927	6.90893e-08	68	0.00705281	2.87108e-06	-0.0333167	0.00427159	-7.7996	6.21041e-15	0.71234	0.00705281	2.87108e-06	2.78376e-12	37	15	53083978	15	50871270	R			NA	NA				chr15:53080458-53083699	S_Shore		RDMR	TRUE				NA
cg01620611	-0.0199267	0.00723765	0.00629329	62	455	-0.0291922	0.00532805	4.86787e-08	1840	-0.0262975	0.0046086	1.3587e-08	68	0.00533484	8.24868e-07	-0.0260778	0.00334352	-7.79951	6.21491e-15	0.58694	0.00533484	8.24868e-07	2.78376e-12	37	17	71306145	17	68817740	F			NA	NA	CDC42EP4	NM_012121	5'UTR	chr17:71306975-71308682	N_Shore		RDMR	NA				NA
cg02447879	-0.010364	0.00747274	0.16659	62	455	-0.0372963	0.00526391	1.96851e-12	1840	-0.0253867	0.00523595	1.35633e-06	68	0.00606105	2.8081e-05	-0.0273664	0.00350892	-7.79911	6.23455e-15	0.0120221	0.00606105	2.8081e-05	2.78976e-12	37	17	79393682	17	77008277	R			NA	NA	BAHCC1	NM_001080519	Body	chr17:79393341-79393742	Island			NA	17:77008277-77008314			TRUE
cg12419932	-0.0265316	0.00605429	1.67046e-05	62	455	-0.0212525	0.00532486	6.83253e-05	1840	-0.0294475	0.00491101	2.45789e-09	68	0.00568491	2.2196e-07	-0.0255052	0.00327048	-7.7986	6.25956e-15	0.563415	0.00568491	2.2196e-07	2.79814e-12	37	18	46069846	18	44323844	R			NA	NA	KIAA0427;KIAA0427	NM_001142397;NM_014772	5'UTR;5'UTR	chr18:46065533-46067826	S_Shelf			TRUE		18:46069774-46070081	Gene_Associated_Cell_type_specific	NA
cg18914962	-0.0220557	0.00659996	0.000947301	62	455	-0.0295779	0.00454003	9.36065e-11	1840	-0.0171306	0.00457564	0.000187192	68	0.00529668	0.00121979	-0.0238238	0.00305541	-7.79724	6.3276e-15	0.19447	0.00529668	0.00121979	2.82573e-12	37	6	136914796	6	136956489	R			NA	NA	MAP3K5	NM_005923	Body					TRUE				NA
cg14258501	-0.0288328	0.00709466	6.29402e-05	62	455	-0.0255018	0.0054049	2.55794e-06	1840	-0.0290565	0.00532114	5.44149e-08	68	0.00615967	2.39087e-06	-0.0274888	0.00352552	-7.7971	6.33471e-15	0.888777	0.00615967	2.39087e-06	2.82607e-12	37	6	31680228	6	31788207	R			NA	NA	LY6G6E;LY6G6E	NR_024541;NR_003673	Body;Body					NA		6:31680111-31680420	Unclassified_Cell_type_specific	NA
cg13843843	-0.0217459	0.00706276	0.00228656	62	455	-0.0283466	0.00523796	7.05844e-08	1840	-0.0269909	0.00490642	4.34377e-08	68	0.0056796	2.01156e-06	-0.0263539	0.0033807	-7.79539	6.42096e-15	0.747152	0.0056796	2.01156e-06	2.86169e-12	37	17	63131043	17	60561505	R			NA	NA				chr17:63133330-63133592	N_Shelf			NA				NA
cg05168015	-0.0218622	0.00849874	0.0106226	62	455	-0.0386279	0.00548719	2.71021e-12	1840	-0.0204635	0.00555365	0.000236096	68	0.00642882	0.00145712	-0.0292021	0.00374626	-7.79498	6.44165e-15	0.062527	0.00642882	0.00145712	2.86804e-12	37	5	171880461	5	171813066	F			NA	NA	SH3PXD2B	NM_001017995	Body	chr5:171881182-171881547	N_Shore			NA				TRUE
cg00316222	-0.0355982	0.00859151	4.55437e-05	62	455	-0.0283166	0.00489044	8.2492e-09	1840	-0.0193601	0.00462996	3.04246e-05	68	0.00535957	0.000303549	-0.0259528	0.00333014	-7.79329	6.52845e-15	0.222341	0.00535957	0.000303549	2.90142e-12	37	6	137817512	6	137859205	R			NA	NA				chr6:137818167-137819372	N_Shore			NA				NA
cg19510626	-0.0153748	0.00825401	0.063566	62	455	-0.0333709	0.00503555	4.48414e-11	1840	-0.0212983	0.00433721	9.94441e-07	68	0.00502068	2.21426e-05	-0.0254478	0.00326535	-7.79327	6.52961e-15	0.0978778	0.00502068	2.21426e-05	2.90142e-12	37	1	113934971	1	113736494	F			NA	NA	MAGI3;MAGI3	NM_152900;NM_001142782	Body;Body	chr1:113932580-113934070	S_Shore		RDMR	NA				NA
cg18034299	-0.0201621	0.00598385	0.000860629	62	455	-0.0249781	0.0042887	6.75939e-09	1840	-0.0182003	0.00384777	2.42823e-06	68	0.00445411	4.38544e-05	-0.0213901	0.00274512	-7.79204	6.59383e-15	0.533951	0.00445411	4.38544e-05	2.92704e-12	37	5	172359680	5	172292286	F	rs474099		NA	NA	ERGIC1	NM_001031711	Body					TRUE		5:172359248-172360680	Unclassified	TRUE
cg00156995	-0.0236116	0.00848478	0.00576081	62	455	-0.0331457	0.00572952	8.49918e-09	1840	-0.0237234	0.00445077	1.11129e-07	68	0.00515213	4.13287e-06	-0.0272037	0.00349161	-7.79117	6.63908e-15	0.425055	0.00515213	4.13287e-06	2.94419e-12	37	13	41055588	13	39953588	F			NA	NA	LOC646982;LOC646982;LOC646982	NR_024505;NR_024507;NR_024506	TSS1500;TSS1500;TSS1500					NA				NA
cg05373251	-0.0182267	0.00979587	0.0638568	62	455	-0.0430869	0.00634867	1.54156e-11	1840	-0.0316706	0.00686494	4.25598e-06	68	0.00794674	6.73803e-05	-0.0344736	0.00442518	-7.79033	6.68348e-15	0.094617	0.00794674	6.73803e-05	2.96094e-12	37	17	79451985	17	77066580	R			NA	NA				chr17:79450924-79451657	S_Shore			NA		17:79450704-79452185	Promoter_Associated	NA
cg07556261	-0.0154414	0.00518459	0.0031558	62	455	-0.0190214	0.00338647	2.24133e-08	1840	-0.016126	0.00305759	1.50365e-07	68	0.00353942	5.21046e-06	-0.0172376	0.00221282	-7.78986	6.70822e-15	0.78032	0.00353942	5.21046e-06	2.96895e-12	37	20	35484900	20	34918314	F		rs80069641	NA	NA	C20orf117;C20orf117	NM_080627;NM_199181	Body;5'UTR					TRUE		20:35484547-35485875	Unclassified_Cell_type_specific	TRUE
cg14608903	-0.0297299	0.00813855	0.000310134	62	455	-0.0205092	0.00481557	2.15757e-05	1840	-0.0310046	0.00477344	1.08346e-10	68	0.00552566	2.01133e-08	-0.025818	0.00331548	-7.78711	6.85615e-15	0.312327	0.00552566	2.01133e-08	3.03142e-12	37	10	116287249	10	116277239	F			NA	NA	ABLIM1;ABLIM1;ABLIM1;ABLIM1	NM_001003408;NM_001003407;NM_006720;NM_002313	Body;Body;TSS1500;Body					TRUE		10:116286409-116287292	Promoter_Associated	NA
cg03752138	-0.0166419	0.00711882	0.0201156	62	455	-0.0222266	0.0041884	1.25129e-07	1840	-0.0214359	0.00353327	1.60174e-09	68	0.00409006	1.5973e-07	-0.0210731	0.00270652	-7.78606	6.91324e-15	0.790112	0.00409006	1.5973e-07	3.05112e-12	37	17	76357232	17	73868827	F		rs73998048	NA	NA	SOCS3	NM_003955	TSS1500	chr17:76354818-76357038	S_Shore	high-CpG:73867500-73868871		NA		17:76356524-76357673	Unclassified	NA
cg01481251	-0.00657165	0.00722314	0.363719	62	455	-0.0259055	0.00432515	2.52558e-09	1840	-0.0192013	0.00306484	4.70392e-10	68	0.0035478	6.22674e-08	-0.0199661	0.00256435	-7.78604	6.9144e-15	0.0681903	0.0035478	6.22674e-08	3.05112e-12	37	11	32912719	11	32869295	R			NA	NA				chr11:32913989-32915514	N_Shore		RDMR	NA		11:32912572-32912770	Unclassified_Cell_type_specific	NA
cg09639152	-0.0214177	0.010814	0.0486341	62	455	-0.0455282	0.00637243	1.29567e-12	1840	-0.0247474	0.00618456	6.56313e-05	68	0.00715914	0.000546732	-0.0339197	0.00435657	-7.78587	6.92341e-15	0.0429268	0.00715914	0.000546732	3.05208e-12	37	3	45078075	3	45053079	R			NA	NA				chr3:45077069-45077690	S_Shore			TRUE	3:45052911-45053106	3:45077441-45079749	Unclassified	NA
cg03119748	-0.0182507	0.00769938	0.0184555	62	455	-0.0283756	0.00664714	2.06494e-05	1840	-0.0278649	0.00390112	1.34688e-12	68	0.00451587	6.81071e-10	-0.0261636	0.00336075	-7.78506	6.96815e-15	0.51973	0.00451587	6.81071e-10	3.06877e-12	37	10	12629812	10	12669818	F		rs77826475	NA	NA	CAMK1D;CAMK1D	NM_020397;NM_153498	Body;Body					TRUE		10:12629790-12629898	Unclassified_Cell_type_specific	NA
cg24572204	-0.0192324	0.00542262	0.000458165	62	455	-0.0256021	0.00542366	2.53103e-06	1840	-0.0256391	0.00429479	2.88088e-09	68	0.00497158	2.50756e-07	-0.0236187	0.00303642	-7.77847	7.34066e-15	0.620896	0.00497158	2.50756e-07	3.22964e-12	37	5	40735231	5	40770988	F			NA	NA	TTC33	NM_012382	Body					TRUE				NA
cg00708603	-0.0139819	0.00626661	0.0264724	62	455	-0.028008	0.00368621	4.75676e-14	1840	-0.0113297	0.00344572	0.00102929	68	0.00398871	0.00450517	-0.0193276	0.00248519	-7.77709	7.42105e-15	0.00581822	0.00398871	0.00450517	3.26179e-12	37	2	16463534	2	16327015	R		rs76981235	NA	NA								TRUE				NA
cg17616646	-0.015206	0.00385051	9.96538e-05	62	455	-0.0150595	0.00297817	4.69208e-07	1840	-0.0135104	0.00264605	3.65967e-07	68	0.00306302	1.0299e-05	-0.0145182	0.00186735	-7.77474	7.56039e-15	0.917043	0.00306302	1.0299e-05	3.31976e-12	37	11	67271660	11	67028236	R			NA	NA	PITPNM1;PITPNM1	NM_004910;NM_001130848	5'UTR;5'UTR	chr11:67271659-67272942	Island			NA	11:67028182-67029453			NA
cg10482356	-0.0190363	0.0052873	0.000376623	62	455	-0.0248998	0.00425848	5.90521e-09	1840	-0.0171842	0.00383847	8.07547e-06	68	0.00444335	0.000110003	-0.0206576	0.00265781	-7.77243	7.69936e-15	0.427961	0.00444335	0.000110003	3.37494e-12	37	16	56328421	16	54885922	R			NA	NA	GNAO1;GNAO1	NM_020988;NM_138736	Body;Body					TRUE				NA
cg16219535	-0.0171368	0.0071908	0.0178414	62	455	-0.0357714	0.00586168	1.26947e-09	1840	-0.0332834	0.00614857	7.0664e-08	68	0.00711749	2.92111e-06	-0.0297656	0.00382966	-7.7724	7.70118e-15	0.112005	0.00711749	2.92111e-06	3.37494e-12	37	14	50054412	14	49124162	R			NA	NA	RPS29;RPS29	NM_001030001;NM_001032	TSS1500;TSS1500	chr14:50052650-50053033	S_Shore			NA				NA
cg04869770	-0.0115139	0.00616892	0.0630399	62	455	-0.0317105	0.0049453	1.81786e-10	1840	-0.0215624	0.00393116	4.75219e-08	68	0.00455064	2.15505e-06	-0.0228694	0.002943	-7.77079	7.80005e-15	0.0356674	0.00455064	2.15505e-06	3.41491e-12	37	1	164561550	1	162828174	F	rs77178171		NA	NA	PBX1	NM_002585	Body					TRUE				NA
cg25838968	-0.0385145	0.00984105	0.000114576	62	455	-0.0346533	0.00564991	1.05015e-09	1840	-0.0203217	0.00519009	9.37604e-05	68	0.00600796	0.000718389	-0.0295035	0.00379713	-7.76993	7.85269e-15	0.135008	0.00600796	0.000718389	3.43459e-12	37	1	208250847	1	206317470	F			NA	NA	PLXNA2	NM_025179	Body					TRUE				NA
cg16014060	-0.00863171	0.00550237	0.117858	62	455	-0.0335075	0.00539494	6.49671e-10	1840	-0.0254651	0.00400415	2.5873e-10	68	0.00463514	3.93112e-08	-0.0230103	0.00296262	-7.76688	8.04438e-15	0.00430701	0.00463514	3.93112e-08	3.51498e-12	37	14	69020214	14	68089967	R			NA	NA	RAD51L1	NM_133509	Body					TRUE				NA
cg08553950	-0.0190747	0.00561139	0.000775348	62	455	-0.0258145	0.00451666	1.27419e-08	1840	-0.0186889	0.00384868	1.3074e-06	68	0.00445517	2.73023e-05	-0.0214454	0.00276122	-7.76664	8.05955e-15	0.473068	0.00445517	2.73023e-05	3.51647e-12	37	20	36012016	20	35445430	R			NA	NA	SRC;SRC	NM_198291;NM_005417	5'UTR;5'UTR	chr20:36012595-36013439	N_Shore	low-CpG:35445350-35445433		NA		20:36011903-36012034	Unclassified_Cell_type_specific	NA
cg07827420	-0.0150499	0.00548675	0.00648747	62	455	-0.0232073	0.00395135	5.05914e-09	1840	-0.0165548	0.0031674	1.93772e-07	68	0.00366653	6.32799e-06	-0.0187458	0.00241366	-7.76657	8.06412e-15	0.352446	0.00366653	6.32799e-06	3.51647e-12	37	17	75371764	17	72883359	F			NA	NA	SEPT9;SEPT9;SEPT9;SEPT9;SEPT9	NM_001113492;NM_001113493;NM_001113491;NM_006640;NM_001113494	5'UTR;Body;Body;Body;TSS1500	chr17:75368688-75370506	S_Shore		RDMR	TRUE				NA
cg14818812	-0.0138923	0.00844984	0.101296	62	455	-0.0389725	0.00611542	2.33962e-10	1840	-0.0288163	0.00521084	3.69558e-08	68	0.00603198	1.77712e-06	-0.029733	0.00382839	-7.76645	8.07143e-15	0.0544711	0.00603198	1.77712e-06	3.51647e-12	37	8	142362180	8	142431362	F			NA	NA								TRUE				TRUE
cg07606234	-0.0178638	0.010131	0.0789589	62	455	-0.0504818	0.00736258	9.59774e-12	1840	-0.0317754	0.00655425	1.35946e-06	68	0.00758709	2.81307e-05	-0.0363745	0.00468485	-7.76428	8.21073e-15	0.0250065	0.00758709	2.81307e-05	3.57367e-12	37	14	24551147	14	23620987	F			NA	NA	NRL	NM_006177	Body	chr14:24550317-24551148	Island			TRUE				NA
cg03419051	-0.0133163	0.00581642	0.0228098	62	455	-0.0236545	0.00409027	8.5973e-09	1840	-0.019864	0.00352514	2.04362e-08	68	0.00408065	1.12821e-06	-0.020085	0.0025873	-7.76293	8.29926e-15	0.346669	0.00408065	1.12821e-06	3.60868e-12	37	17	29814382	17	26838508	F			NA	NA	RAB11FIP4	NM_032932	Body	chr17:29814614-29815662	N_Shore			NA				NA
cg07082267	-0.0132091	0.00513957	0.0106923	62	455	-0.0173085	0.00320562	7.55372e-08	1840	-0.0180774	0.00311571	7.78814e-09	68	0.00360669	5.38145e-07	-0.0168554	0.00217163	-7.76163	8.38436e-15	0.726841	0.00360669	5.38145e-07	3.64214e-12	37	16	85429035	16	83986536	R			NA	NA								TRUE				NA
cg01882880	-0.00994712	0.00517166	0.0554598	62	455	-0.0144647	0.00311649	3.70631e-06	1840	-0.0131701	0.00190836	7.23173e-12	68	0.00220909	2.49506e-09	-0.0132071	0.00170186	-7.7604	8.46641e-15	0.755612	0.00220909	2.49506e-09	3.6742e-12	37	17	46623819	17	43978818	R			NA	NA	HOXB2	NM_002145	TSS1500	chr17:46627787-46628444	N_Shelf			NA				TRUE
cg00384847	-0.0231296	0.00722767	0.00153393	62	455	-0.0208725	0.00440266	2.29142e-06	1840	-0.025272	0.00412925	1.15564e-09	68	0.00477995	1.24287e-07	-0.0229315	0.00295526	-7.75957	8.52175e-15	0.794846	0.00477995	1.24287e-07	3.69462e-12	37	1	12291339	1	12213926	F			NA	NA	VPS13D;VPS13D	NM_018156;NM_015378	5'UTR;5'UTR	chr1:12289954-12290585	S_Shore			NA		1:12289626-12291393	Promoter_Associated	NA
cg20296990	-0.0128634	0.00475477	0.00724755	62	455	-0.0186674	0.00264141	2.23504e-12	1840	-0.00855028	0.00233004	0.000250378	68	0.00269721	0.00152417	-0.0135987	0.00175407	-7.75266	8.99843e-15	0.027194	0.00269721	0.00152417	3.89661e-12	37	17	79184968	17	76799563	F			NA	NA	AZI1;AZI1	NM_014984;NM_001009811	Body;Body	chr17:79183373-79183967	S_Shore			NA				NA
cg23351289	-0.0372439	0.00792188	4.08534e-06	62	455	-0.0216929	0.00503639	1.74033e-05	1840	-0.0232399	0.00424235	4.93891e-08	68	0.00491088	2.21967e-06	-0.0249147	0.00321373	-7.75257	9.00511e-15	0.229036	0.00491088	2.21967e-06	3.89661e-12	37	19	34849945	19	39541785	F			NA	NA				chr19:34850071-34850587	N_Shore			TRUE		19:34849595-34850872	Promoter_Associated	NA
cg05725263	0.00338536	0.0042572	0.427176	62	455	-0.00766609	0.00111521	8.51125e-12	1840	-0.00652607	0.00130982	6.91347e-07	68	0.00151623	1.67629e-05	-0.00681178	0.000879016	-7.74932	9.23857e-15	0.0415928	0.00151623	1.67629e-05	3.99376e-12	37	11	66650560	11	66407136	F		rs58204291	NA	NA	PC;PC;PC	NM_000920;NM_022172;NM_001040716	5'UTR;5'UTR;5'UTR					NA	11:66407048-66407143	11:66649482-66651259	Unclassified	TRUE
cg13038618	-0.0182637	0.00857779	0.0341239	62	455	-0.0344627	0.00552599	5.53809e-10	1840	-0.0243929	0.00475381	3.20574e-07	68	0.00550294	9.30564e-06	-0.0274985	0.00354974	-7.74662	9.43702e-15	0.21591	0.00550294	9.30564e-06	4.07246e-12	37	14	77467391	14	76537144	F	rs77768261		NA	NA								NA	14:76536767-76537145			NA
cg11848931	-0.0387404	0.0124202	0.00200572	62	455	-0.0442268	0.00838339	1.48005e-07	1840	-0.0542667	0.00969592	2.53692e-08	68	0.0112238	1.33175e-06	-0.0457672	0.00590804	-7.7466	9.4389e-15	0.628979	0.0112238	1.33175e-06	4.07246e-12	37	10	25210092	10	25250098	R			NA	NA	PRTFDC1	NM_020200	Body					TRUE				NA
cg05609445	-0.0073841	0.00531271	0.165682	62	455	-0.0177445	0.00342322	2.41617e-07	1840	-0.013752	0.00204017	2.14827e-11	68	0.00236167	5.77989e-09	-0.0141356	0.00182557	-7.74311	9.70154e-15	0.252489	0.00236167	5.77989e-09	4.18174e-12	37	11	19203825	11	19160401	R			NA	NA	CSRP3;CSRP3	NM_001127656;NM_003476	3'UTR;3'UTR					NA				NA
cg04448477	-0.0140702	0.00565192	0.0133831	62	455	-0.0198778	0.00373857	1.18372e-07	1840	-0.0183807	0.00310107	3.71787e-09	68	0.00358975	3.05021e-07	-0.0182265	0.00235406	-7.74257	9.74249e-15	0.691521	0.00358975	3.05021e-07	4.19534e-12	37	4	55095148	4	54789905	R			NA	NA	PDGFRA	NM_006206	TSS200	chr4:55096185-55100331	N_Shore			NA		4:55095087-55095309	Unclassified_Cell_type_specific	TRUE
cg23942789	-0.0166368	0.00549015	0.00267478	62	455	-0.0235679	0.00362747	1.05143e-10	1840	-0.0121586	0.00280207	1.51375e-05	68	0.00324363	0.000177921	-0.0171319	0.00221285	-7.742	9.78672e-15	0.0637089	0.00324363	0.000177921	4.21032e-12	37	5	76505840	5	76541596	F			NA	NA	PDE8B;PDE8B;PDE8B;PDE8B;PDE8B	NM_001029851;NM_001029854;NM_001029852;NM_003719;NM_001029853	TSS1500;TSS1500;TSS1500;TSS1500;TSS1500	chr5:76506029-76507189	N_Shore			NA				NA
cg05955675	-0.0316019	0.0153272	0.0401607	62	455	-0.0719032	0.010497	1.00454e-11	1840	-0.0439654	0.00995573	1.06788e-05	68	0.0115246	0.000136229	-0.0535965	0.00692355	-7.74119	9.84904e-15	0.0550478	0.0115246	0.000136229	4.23305e-12	37	16	85206653	16	83764154	R			NA	NA				chr16:85204598-85205031	S_Shore		RDMR	NA				NA
cg09391066	-0.0248017	0.00963183	0.0105459	62	455	-0.033711	0.00566227	3.13363e-09	1840	-0.0270486	0.00539317	5.84245e-07	68	0.00624305	1.47358e-05	-0.0297633	0.0038454	-7.73996	9.94461e-15	0.624841	0.00624305	1.47358e-05	4.27001e-12	37	6	3163814	6	3108813	F			NA	NA				chr6:3162832-3163523	S_Shore			NA		6:3162460-3163974	Unclassified	NA
cg02852238	-0.0231372	0.00712916	0.00131725	62	455	-0.0241254	0.00404422	2.91965e-09	1840	-0.0180413	0.0040537	9.11605e-06	68	0.00469249	0.000120694	-0.0217825	0.00281461	-7.73908	1.0014e-14	0.604299	0.00469249	0.000120694	4.29567e-12	37	15	42174934	15	39962226	R			NA	NA	SPTBN5	NM_016642	Body	chr15:42174084-42174855	S_Shore			NA				TRUE
cg27418434	-0.00421984	0.0024556	0.0868349	62	455	-0.00757108	0.00110763	1.10866e-11	1840	-0.00540482	0.00132027	4.44261e-05	68	0.00152832	0.000405563	-0.00651847	0.000842434	-7.73766	1.01264e-14	0.315006	0.00152832	0.000405563	4.3397e-12	37	7	751009	7	717535	R			NA	NA	PRKAR1B;PRKAR1B;PRKAR1B;PRKAR1B;PRKAR1B;PRKAR1B	NM_001164759;NM_001164762;NM_001164758;NM_001164760;NM_001164761;NM_002735	Body;Body;Body;Body;Body;Body	chr7:750788-751237	Island			NA	7:717343-719048			TRUE
cg27054084	-0.0139672	0.00630695	0.0276062	62	455	-0.0241836	0.00382554	3.23972e-10	1840	-0.0197752	0.00414681	2.01039e-06	68	0.00480027	3.79527e-05	-0.0209093	0.00270302	-7.73554	1.02968e-14	0.36789	0.00480027	3.79527e-05	4.4085e-12	37	5	122851781	5	122879680	F			NA	NA	CSNK1G3;CSNK1G3;CSNK1G3;CSNK1G3	NM_001044722;NM_004384;NM_001031812;NM_001044723	5'UTR;5'UTR;5'UTR;5'UTR	chr5:122847661-122848292	S_Shelf			NA		5:122851455-122851805	Unclassified_Cell_type_specific	NA
cg23371680	-0.0111649	0.00612826	0.0695579	62	455	-0.0312198	0.00467502	3.19812e-11	1840	-0.0253991	0.00506883	5.97879e-07	68	0.0058676	1.49984e-05	-0.024288	0.00313995	-7.73515	1.03285e-14	0.0330416	0.0058676	1.49984e-05	4.41782e-12	37	2	31511030	2	31364534	F			NA	NA								TRUE				NA
cg19852660	-0.00916714	0.00725835	0.207662	62	455	-0.0266143	0.00446031	2.89304e-09	1840	-0.0284049	0.0046533	1.27469e-09	68	0.00538659	1.34015e-07	-0.0240162	0.00310518	-7.73423	1.04031e-14	0.0747061	0.00538659	1.34015e-07	4.44548e-12	37	11	2846681	11	2803257	F			NA	NA	KCNQ1;KCNQ1	NM_000218;NM_181798	Body;Body					NA	11:2803217-2803348			TRUE
cg06974428	-0.0272847	0.00711945	0.000157179	62	455	-0.0339672	0.00551892	9.21074e-10	1840	-0.0218212	0.00625093	0.000493644	68	0.00723597	0.00256423	-0.0288902	0.00373563	-7.73371	1.0446e-14	0.396237	0.00723597	0.00256423	4.45956e-12	37	10	22972299	10	23012305	R			NA	NA	PIP4K2A	NM_005028	Body					TRUE		10:22972157-22972556	Unclassified	NA
cg14037218	-0.0146053	0.00618807	0.0189592	62	455	-0.029699	0.0046056	1.44017e-10	1840	-0.0217843	0.0046145	2.54005e-06	68	0.00534168	4.53918e-05	-0.0234984	0.00303861	-7.73329	1.04804e-14	0.136635	0.00534168	4.53918e-05	4.46997e-12	37	1	150522367	1	148788991	F			NA	NA	ADAMTSL4;ADAMTSL4	NM_019032;NM_025008	5'UTR;5'UTR	chr1:150521349-150522368	Island			NA				NA
cg20276630	-0.0317784	0.00914871	0.000596176	62	455	-0.0338245	0.00564965	2.56356e-09	1840	-0.0229666	0.00537968	2.06979e-05	68	0.00622743	0.000226047	-0.0294166	0.00380519	-7.73064	1.07006e-14	0.417249	0.00622743	0.000226047	4.55952e-12	37	10	97055439	10	97045429	R			NA	NA				chr10:97055128-97055448	Island		DMR	NA	10:97045119-97045438			NA
cg15677294	-0.0208471	0.00557935	0.000226785	62	455	-0.0230628	0.00434849	1.27221e-07	1840	-0.0172752	0.0034565	6.38824e-07	68	0.00400119	1.57788e-05	-0.0201288	0.00260404	-7.72983	1.07691e-14	0.612496	0.00400119	1.57788e-05	4.58431e-12	37	19	6502938	19	6453938	R			NA	TRUE	TUBB4	NM_006087	TSS1500	chr19:6502090-6502411	S_Shore			NA				TRUE
cg07658646	-0.0306009	0.00788389	0.000129962	62	455	-0.0385676	0.00649471	3.43468e-09	1840	-0.0271876	0.0071705	0.000154874	68	0.00830046	0.00105499	-0.0331663	0.00429101	-7.72925	1.08186e-14	0.517801	0.00830046	0.00105499	4.60099e-12	37	12	11002197	12	10893464	R			NA	NA	PRR4;PRR4	NM_007244;NM_001098538	TSS200;Body					NA				NA
cg13661908	-0.0126557	0.00461864	0.00654189	62	455	-0.0135274	0.00336961	6.19567e-05	1840	-0.0213404	0.00293103	5.03327e-13	68	0.00339291	3.18082e-10	-0.0164029	0.00212325	-7.72534	1.11556e-14	0.173411	0.00339291	3.18082e-10	4.7398e-12	37	17	42441775	17	39797301	F			NA	NA	FAM171A2	NM_198475	TSS1500	chr17:42440522-42441281	S_Shore			NA				NA
cg24403338	-0.0165324	0.00815446	0.043582	62	455	-0.0278759	0.00490651	1.54984e-08	1840	-0.0277393	0.00480504	9.22863e-09	68	0.00556224	6.13014e-07	-0.0259073	0.0033539	-7.72453	1.12265e-14	0.451313	0.00556224	6.13014e-07	4.76539e-12	37	20	31366437	20	30830098	R			NA	NA	DNMT3B;DNMT3B;DNMT3B;DNMT3B	NM_175849;NM_006892;NM_175850;NM_175848	5'UTR;5'UTR;TSS1500;5'UTR					NA		20:31365642-31367246	Unclassified	TRUE
cg24674703	-0.0298438	0.00797152	0.000220581	62	455	-0.0326858	0.00615649	1.23473e-07	1840	-0.023068	0.00458006	5.23811e-07	68	0.0053018	1.35538e-05	-0.0277063	0.00358757	-7.72287	1.13742e-14	0.474386	0.0053018	1.35538e-05	4.82349e-12	37	11	60869960	11	60626536	F			NA	TRUE	CD5;CD5	NM_014207;NM_014207	5'UTR;1stExon			low-CpG:60626530-60626549		NA		11:60869464-60870416	Promoter_Associated_Cell_type_specific	NA
cg00349404	-0.0171509	0.00879122	0.0520788	62	455	-0.0342185	0.00548572	5.49405e-10	1840	-0.0283125	0.00552197	3.27317e-07	68	0.00639214	9.45521e-06	-0.0290463	0.00376239	-7.72017	1.16177e-14	0.254995	0.00639214	9.45521e-06	4.92209e-12	37	10	106100036	10	106090026	R			NA	NA				chr10:106097595-106098556	S_Shore			NA				NA
cg18969008	-0.0382187	0.0102075	0.000220266	62	455	-0.0334011	0.00639439	1.95476e-07	1840	-0.0366572	0.00736933	7.20554e-07	68	0.00853062	1.73025e-05	-0.0353047	0.00457408	-7.71841	1.17786e-14	0.906986	0.00853062	1.73025e-05	4.98549e-12	37	2	10445016	2	10362467	F			NA	NA	HPCAL1;HPCAL1	NM_002149;NM_134421	5'UTR;5'UTR	chr2:10442308-10444509	S_Shore			NA	2:10362208-10362487	2:10443656-10445129	Promoter_Associated	NA
cg13097993	-0.0342726	0.0110147	0.00205629	62	455	-0.0333948	0.00601271	3.19825e-08	1840	-0.0315768	0.00624224	4.67726e-07	68	0.00722592	1.24279e-05	-0.0328938	0.00426189	-7.71814	1.18041e-14	0.972471	0.00722592	1.24279e-05	4.98787e-12	37	14	51026600	14	50096350	F			NA	NA	ATL1;ATL1;ATL1	NM_015915;NM_001127713;NM_181598	TSS200;5'UTR;TSS200	chr14:51026872-51027570	N_Shore			NA				NA
cg20923498	-0.019912	0.00597026	0.000969147	62	455	-0.0260879	0.00512066	3.85211e-07	1840	-0.0204438	0.00365212	2.52365e-08	68	0.00422763	1.32641e-06	-0.0220839	0.00286131	-7.71811	1.18065e-14	0.63946	0.00422763	1.32641e-06	4.98787e-12	37	2	99096920	2	98463352	F			NA	NA	INPP4A;INPP4A;INPP4A;INPP4A	NM_001566;NM_004027;NM_001134224;NM_001134225	5'UTR;5'UTR;5'UTR;5'UTR					TRUE		2:99096833-99096945	Promoter_Associated	TRUE
cg12816198	-0.0158312	0.00928069	0.0891653	62	455	-0.0435785	0.00706248	8.35541e-10	1840	-0.063076	0.0100258	3.9858e-10	68	0.0116057	5.48172e-08	-0.0390396	0.0050583	-7.71793	1.18234e-14	0.00417761	0.0116057	5.48172e-08	4.99028e-12	37	7	128577593	7	128364829	R			NA	NA	IRF5;IRF5;IRF5;IRF5;IRF5;IRF5	NM_001098630;NM_032643;NM_001098629;NM_001098628;NM_001098631;NM_002200	TSS1500;TSS1500;TSS1500;TSS1500;TSS1500;TSS1500	chr7:128577818-128578756	N_Shore			NA	7:128364660-128366218	7:128577494-128579368	Promoter_Associated	NA
cg06772279	-0.010508	0.00474856	0.0277235	62	455	-0.0258771	0.00330855	8.73836e-15	1840	-0.00969808	0.00348268	0.00541731	68	0.00403149	0.0161468	-0.0173741	0.00225172	-7.71592	1.20112e-14	0.00211122	0.00403149	0.0161468	5.06204e-12	37	1	226075679	1	224142302	F			NA	NA	LEFTY1	NM_020997	Body	chr1:226075150-226075680	Island			NA				TRUE
cg10950358	-0.0203598	0.00926926	0.0288886	62	455	-0.0495975	0.00723442	9.64855e-12	1840	-0.0332483	0.00763724	1.4194e-05	68	0.00884075	0.00016937	-0.0369776	0.00479241	-7.71587	1.20161e-14	0.0400549	0.00884075	0.00016937	5.06204e-12	37	1	147253401	1	145720025	R			NA	NA								TRUE				NA
cg18809126	-0.0101165	0.00405778	0.0132488	62	455	-0.0158611	0.00351032	6.6265e-06	1840	-0.0213577	0.00301975	2.20591e-12	68	0.00349561	9.97257e-10	-0.0163123	0.00211419	-7.71562	1.20392e-14	0.109091	0.00349561	9.97257e-10	5.06699e-12	37	3	11623526	3	11598526	F			TRUE	NA	VGLL4;VGLL4;VGLL4	NM_014667;NM_001128220;NM_001128219	Body;Body;Body					TRUE				NA
cg19727396	-0.0083515	0.00435025	0.0559173	62	455	-0.017483	0.00248617	2.85719e-12	1840	-0.0115439	0.0030786	0.000182921	68	0.00356374	0.00119841	-0.0142442	0.00184628	-7.71509	1.209e-14	0.128343	0.00356374	0.00119841	5.08354e-12	37	1	230415185	1	228481808	R			NA	NA	GALNT2	NM_004481	Body	chr1:230415342-230415689	N_Shore			NA	1:228481742-228481849			NA
cg09570614	-0.0274159	0.00729712	0.000209734	62	455	-0.0214265	0.00448056	1.87275e-06	1840	-0.0235613	0.00424339	3.25875e-08	68	0.00491207	1.6137e-06	-0.0232528	0.00301461	-7.71337	1.22535e-14	0.780523	0.00491207	1.6137e-06	5.14745e-12	37	2	112124380	2	111840851	R			NA	NA								NA	2:111840835-111840902			NA
cg05720226	-0.014572	0.00522316	0.00563999	62	455	-0.0271294	0.00396991	1.12075e-11	1840	-0.01248	0.00295385	2.51506e-05	68	0.00341933	0.000262396	-0.0179003	0.00232097	-7.71245	1.23427e-14	0.0155809	0.00341933	0.000262396	5.18004e-12	37	7	116786597	7	116573833	F			NA	NA	ST7;ST7;ST7OT2	NM_018412;NM_021908;NR_002331	Body;Body;TSS1500					NA				NA
cg15514896	-0.0274418	0.00718871	0.000166579	62	455	-0.0209519	0.00542795	0.000117301	1840	-0.0301567	0.00464097	1.06472e-10	68	0.00537231	1.98449e-08	-0.0260066	0.00337215	-7.71218	1.23691e-14	0.471471	0.00537231	1.98449e-08	5.18623e-12	37	1	229074115	1	227140738	F			NA	NA								TRUE		1:229074017-229074646	Unclassified_Cell_type_specific	NA
cg17526175	-0.0133507	0.00695577	0.0559687	62	455	-0.0332586	0.00537519	7.51867e-10	1840	-0.0331741	0.00592352	2.48659e-08	68	0.00685697	1.31144e-06	-0.0278598	0.00361438	-7.70806	1.27746e-14	0.0507804	0.00685697	1.31144e-06	5.35126e-12	37	19	33624542	19	38316382	F			NA	NA	WDR88	NM_173479	Body	chr19:33625467-33625805	N_Shore			TRUE				NA
cg02065192	-0.00473935	0.00359703	0.188739	62	455	-0.0198895	0.00240195	2.32859e-16	1840	-0.00691426	0.00203911	0.000712649	68	0.00236044	0.00339803	-0.0117525	0.00152481	-7.70747	1.28336e-14	5.89111e-05	0.00236044	0.00339803	5.37091e-12	37	1	6421414	1	6344001	F			NA	NA	ACOT7;ACOT7;ACOT7	NM_181864;NM_181865;NM_007274	Body;TSS1500;Body					NA				NA
cg17228560	-0.0250244	0.0103344	0.0161033	62	455	-0.0416991	0.007315	1.38855e-08	1840	-0.0334615	0.00604643	3.61298e-08	68	0.00699925	1.74658e-06	-0.035008	0.00454244	-7.70686	1.28949e-14	0.402772	0.00699925	1.74658e-06	5.3915e-12	37	17	39993002	17	37246528	F			NA	NA	KLHL10;NT5C3L	NM_152467;NM_052935	TSS1500;TSS1500	chr17:39992021-39992627	S_Shore		DMR	NA				NA
cg19821872	-0.00968458	0.00417279	0.0210217	62	455	-0.0207884	0.00274266	5.45915e-14	1840	-0.00847483	0.00293239	0.00389992	68	0.00339448	0.0125373	-0.0146318	0.00189949	-7.70301	1.32896e-14	0.00769478	0.00339448	0.0125373	5.55134e-12	37	2	240667798	2	240332735	R			NA	NA								NA	2:240332702-240332838			NA
cg14986357	-0.0152289	0.00259799	1.30336e-08	62	455	-0.00756079	0.00170736	1.00535e-05	1840	-0.00699823	0.00168657	3.49706e-05	68	0.00195234	0.000337686	-0.00887257	0.00115197	-7.70207	1.3388e-14	0.0235404	0.00195234	0.000337686	5.58722e-12	37	1	44888866	1	44661453	F			NA	NA	RNF220	NM_018150	Body					TRUE				NA
cg17601209	-0.00269424	0.00266251	0.312464	62	455	-0.0136734	0.00186935	3.83677e-13	1840	-0.00903273	0.00193262	3.18765e-06	68	0.00223717	5.40087e-05	-0.00972468	0.00126286	-7.70053	1.35499e-14	0.00313527	0.00223717	5.40087e-05	5.64439e-12	37	1	3191678	1	3181538	R		rs75375178	NA	NA	PRDM16;PRDM16	NM_022114;NM_199454	Body;Body	chr1:3195376-3196052	N_Shelf			NA	1:3181475-3181562			NA
cg14794655	-0.0217055	0.0089314	0.0157263	62	455	-0.0356068	0.00575041	7.30621e-10	1840	-0.0240084	0.00491891	1.15457e-06	68	0.00569405	2.48239e-05	-0.0283806	0.00368553	-7.70053	1.35503e-14	0.255722	0.00569405	2.48239e-05	5.64439e-12	37	2	54558352	2	54411856	R			NA	NA	C2orf73	NM_001100396	Body	chr2:54557630-54558039	S_Shore			NA		2:54557264-54558433	Promoter_Associated	NA
cg08133584	-0.0275842	0.00859176	0.00148149	62	455	-0.0318706	0.00625161	3.78574e-07	1840	-0.0276608	0.00495479	2.74951e-08	68	0.00573558	1.41654e-06	-0.029195	0.00379236	-7.69839	1.37792e-14	0.865077	0.00573558	1.41654e-06	5.73436e-12	37	16	609679	16	549680	R			NA	NA	C16orf11	NM_145270	TSS1500	chr16:609772-611178	N_Shore			NA	16:549662-551479	16:609627-609927	Unclassified_Cell_type_specific	NA
cg04223924	-0.0168028	0.00792699	0.0349243	62	455	-0.0400918	0.00586089	1.07014e-11	1840	-0.0296745	0.00695442	2.08948e-05	68	0.00805032	0.000227692	-0.0313026	0.00406704	-7.69664	1.39689e-14	0.0597354	0.00805032	0.000227692	5.80792e-12	37	2	98552472	2	97918904	F			NA	NA	TMEM131	NM_015348	Body					TRUE				NA
cg26426774	-0.0139504	0.00375861	0.000249107	62	455	-0.0202642	0.0033479	1.72079e-09	1840	-0.0124877	0.00316784	8.4046e-05	68	0.00366704	0.000660684	-0.0158898	0.00206562	-7.69252	1.44262e-14	0.242417	0.00366704	0.000660684	5.99076e-12	37	8	33356290	8	33475832	F	rs76212197		NA	NA	C8orf41;MAK16;C8orf41	NM_001102401;NM_032509;NM_025115	3'UTR;3'UTR;3'UTR					NA				NA
cg13641082	-0.0202907	0.00504406	7.43357e-05	62	455	-0.0182777	0.00397077	4.44818e-06	1840	-0.0233293	0.00425429	4.78625e-08	68	0.0049247	2.16688e-06	-0.0202741	0.00263559	-7.69244	1.44356e-14	0.726993	0.0049247	2.16688e-06	5.99076e-12	37	7	2319604	7	2286130	R			NA	NA	SNX8	NM_013321	Body	chr7:2318238-2319079	S_Shore			NA				NA
cg00537837	-0.0234267	0.00916129	0.0110889	62	455	-0.0419625	0.00650488	1.41727e-10	1840	-0.0311447	0.00720221	1.61812e-05	68	0.00833716	0.000187234	-0.034423	0.00447506	-7.69219	1.44642e-14	0.230069	0.00833716	0.000187234	5.99706e-12	37	16	85363209	16	83920710	R			NA	NA				chr16:85363116-85363360	Island			TRUE				TRUE
cg13905081	-0.0198057	0.00648286	0.00247003	62	455	-0.0260104	0.00493362	1.50774e-07	1840	-0.0205531	0.00370928	3.47607e-08	68	0.0042938	1.6956e-06	-0.022286	0.00289743	-7.69165	1.45246e-14	0.644312	0.0042938	1.6956e-06	6.01652e-12	37	9	140199209	9	139319030	R			NA	NA				chr9:140195501-140197475	S_Shore			NA		9:140199040-140199749	Unclassified	NA
cg26436136	-0.00466918	0.0063847	0.465212	62	455	-0.0193245	0.00270221	1.23457e-12	1840	-0.0114351	0.00264454	1.62033e-05	68	0.00306128	0.000187429	-0.0148449	0.00193099	-7.68772	1.49782e-14	0.0382169	0.00306128	0.000187429	6.19867e-12	37	3	182970675	3	184453369	F			NA	NA	MCF2L2;B3GNT5	NM_015078;NM_032047	Body;TSS1500	chr3:182971429-182972635	N_Shore			NA		3:182970645-182972632	Unclassified_Cell_type_specific	NA
cg00969087	-0.0111764	0.0077363	0.149684	62	455	-0.0240023	0.00506992	2.36667e-06	1840	-0.0293267	0.0040785	9.60018e-13	68	0.00472121	5.24184e-10	-0.0242468	0.00315477	-7.68576	1.5209e-14	0.134365	0.00472121	5.24184e-10	6.28835e-12	37	1	116710331	1	116511854	F			NA	NA				chr1:116710157-116710546	Island			TRUE	1:116511728-116512802	1:116710252-116712218	Promoter_Associated	NA
cg02699834	-0.0205475	0.00456925	1.01629e-05	62	455	-0.0137492	0.00319126	1.73138e-05	1840	-0.0170488	0.0031542	7.38664e-08	68	0.00365125	3.02205e-06	-0.0163413	0.0021267	-7.68388	1.54337e-14	0.46192	0.00365125	3.02205e-06	6.37535e-12	37	12	53039430	12	51325697	R			NA	NA	KRT2	NM_000423	Body					NA		12:53039135-53039714	Unclassified_Cell_type_specific	NA
cg16254946	-0.0128585	0.00512463	0.012675	62	455	-0.0195757	0.00337624	7.87673e-09	1840	-0.0154231	0.00294004	1.74888e-07	68	0.00340335	5.84991e-06	-0.01668	0.00217114	-7.68259	1.55899e-14	0.48966	0.00340335	5.84991e-06	6.43388e-12	37	1	54058616	1	53831204	R			NA	NA	GLIS1	NM_147193	Body					TRUE				NA
cg05386769	-0.0179837	0.00537562	0.000935487	62	455	-0.0238893	0.00456552	1.86295e-07	1840	-0.0206286	0.00387495	1.15175e-07	68	0.00448558	4.24768e-06	-0.0211193	0.00274948	-7.68119	1.57619e-14	0.69757	0.00448558	4.24768e-06	6.49888e-12	37	2	218681558	2	218389803	R			NA	NA	TNS1	NM_022648	Body					TRUE				TRUE
cg06474661	-0.00735751	0.00627996	0.242373	62	455	-0.0240447	0.00426113	1.93356e-08	1840	-0.0265565	0.00403245	6.00496e-11	68	0.0046679	1.27658e-08	-0.0216077	0.00281356	-7.67986	1.59261e-14	0.0368813	0.0046679	1.27658e-08	6.56051e-12	37	17	48239271	17	45594270	F			NA	NA				chr17:48238772-48239073	S_Shore			TRUE	17:45593566-45594573	17:48238274-48239595	Promoter_Associated	NA
cg27569858	0.00315366	0.00691644	0.648773	62	455	-0.0350529	0.0045037	1.17102e-14	1840	-0.0217176	0.00422694	3.09567e-07	68	0.00489303	9.05992e-06	-0.0229459	0.00298842	-7.67828	1.61244e-14	2.11326e-05	0.00489303	9.05992e-06	6.63607e-12	37	1	110614161	1	110415684	F	rs34203717	rs35602525	NA	NA	ALX3	NM_006492	TSS1500	chr1:110610265-110613303	S_Shore			NA		1:110614115-110614227	Unclassified_Cell_type_specific	NA
cg04720348	-0.00620219	0.00716455	0.387419	62	455	-0.029924	0.0043373	7.16635e-12	1840	-0.0240606	0.00481773	6.51067e-07	68	0.00557693	1.60098e-05	-0.0237149	0.00308915	-7.67685	1.63049e-14	0.01806	0.00557693	1.60098e-05	6.70416e-12	37	5	72922873	5	72958629	F			NA	NA	RGNEF	NM_001080479	5'UTR	chr5:72921593-72922527	S_Shore		CDMR	NA				NA
cg24803517	-0.0589649	0.0109993	1.75202e-07	62	455	-0.0330778	0.0078129	2.41164e-05	1840	-0.0362147	0.00777585	3.45046e-06	68	0.0090012	5.73846e-05	-0.039909	0.00519944	-7.67562	1.64618e-14	0.139851	0.0090012	5.73846e-05	6.76246e-12	37	5	94621517	5	94647273	R			NA	NA	MCTP1	NM_024717	TSS1500	chr5:94619459-94621121	S_Shore			NA				NA
cg08468082	-0.01272	0.00504187	0.0122021	62	455	-0.0232549	0.00406575	1.24269e-08	1840	-0.019114	0.0034895	4.95164e-08	68	0.00403938	2.22406e-06	-0.0191077	0.00249129	-7.66978	1.72288e-14	0.266389	0.00403938	2.22406e-06	7.06939e-12	37	1	15334845	1	15207432	R			NA	NA	KIAA1026;KIAA1026;KIAA1026;KIAA1026;KIAA1026	NM_001017999;NM_201628;NM_001018001;NM_015209;NM_001018000	Body;Body;Body;Body;Body					TRUE				NA
cg07573937	-0.0223813	0.00752949	0.00321459	62	455	-0.0370027	0.00587973	3.87621e-10	1840	-0.0281143	0.00677225	3.46698e-05	68	0.00783945	0.00033546	-0.0305966	0.00398929	-7.66969	1.72407e-14	0.289707	0.00783945	0.00033546	7.06939e-12	37	3	14465629	3	14440633	R			NA	NA	SLC6A6;SLC6A6;SLC6A6	NM_001134368;NM_001134367;NM_003043	5'UTR;5'UTR;5'UTR					TRUE		3:14465524-14465731	Promoter_Associated	NA
cg09325164	-0.0293541	0.00559651	3.11458e-07	62	455	-0.0176849	0.00322414	4.70345e-08	1840	-0.0108926	0.00314848	0.000554147	68	0.00364463	0.0028019	-0.0170027	0.00221725	-7.66835	1.74223e-14	0.0210045	0.00364463	0.0028019	7.1373e-12	37	1	32537942	1	32310529	R			NA	NA	TMEM39B	NM_018056	TSS1500	chr1:32538205-32539052	N_Shore			NA		1:32537893-32539507	Promoter_Associated	NA
cg08428188	-0.0274562	0.0116274	0.0189046	62	455	-0.0482854	0.00749828	1.52541e-10	1840	-0.0306335	0.00675997	6.25881e-06	68	0.00782523	9.05129e-05	-0.0376301	0.00490802	-7.66707	1.75971e-14	0.166596	0.00782523	9.05129e-05	7.2023e-12	37	16	85363174	16	83920675	R			NA	NA				chr16:85363116-85363360	Island			TRUE				TRUE
cg17411994	-0.00628164	0.00587798	0.286151	62	455	-0.0249234	0.00344081	6.40113e-13	1840	-0.0154709	0.00363907	2.23964e-05	68	0.00421253	0.000240111	-0.0186073	0.00242706	-7.66661	1.766e-14	0.0155994	0.00421253	0.000240111	7.22141e-12	37	1	37914852	1	37687439	F			NA	NA								TRUE				NA
cg06688763	-0.0467643	0.0146326	0.00155586	62	455	-0.0554202	0.00881484	4.02861e-10	1840	-0.054566	0.01547	0.000431004	68	0.0179078	0.00231092	-0.0533343	0.00695746	-7.66578	1.77745e-14	0.877076	0.0179078	0.00231092	7.26159e-12	37	7	92238207	7	92076143	F			NA	NA	CDK6;CDK6	NM_001259;NM_001145306	3'UTR;3'UTR				CDMR	NA	7:92076022-92076150			NA
cg26134665	-0.0213039	0.00679673	0.00190755	62	455	-0.0254134	0.00463763	4.84487e-08	1840	-0.0204767	0.00400595	3.55231e-07	68	0.00463722	1.00668e-05	-0.022635	0.00295339	-7.66406	1.80142e-14	0.735693	0.00463722	1.00668e-05	7.35278e-12	37	16	31021544	16	30929045	R			NA	TRUE	STX1B	NM_052874	Body					NA		16:31021108-31022608	Unclassified_Cell_type_specific	NA
cg19715094	-0.0254874	0.00719642	0.000466584	62	455	-0.0278889	0.0059226	2.67699e-06	1840	-0.0266979	0.0047044	1.62442e-08	68	0.00544573	9.4603e-07	-0.0268277	0.00350203	-7.6606	1.85067e-14	0.966881	0.00544573	9.4603e-07	7.5469e-12	37	11	118402540	11	117907750	F			NA	NA	TMEM25;TMEM25;TMEM25;TMEM25;TMEM25;TMEM25	NM_001144037;NM_001144036;NM_032780;NM_001144038;NM_001144034;NM_001144035	Body;Body;Body;Body;Body;Body	chr11:118401235-118402069	S_Shore		CDMR	NA				NA
cg02013841	-0.0150995	0.00818023	0.0659853	62	455	-0.0345412	0.0066687	2.46726e-07	1840	-0.0269737	0.00413014	8.59062e-11	68	0.00478098	1.68212e-08	-0.026884	0.00350976	-7.65976	1.86274e-14	0.183218	0.00478098	1.68212e-08	7.58919e-12	37	13	49159767	13	48057768	F			NA	NA								TRUE				NA
cg14875081	-0.0138966	0.00524622	0.00854106	62	455	-0.0233177	0.00353594	5.5598e-11	1840	-0.0119495	0.00274257	1.39655e-05	68	0.00317476	0.00016728	-0.0164964	0.002154	-7.65849	1.88137e-14	0.0493332	0.00317476	0.00016728	7.65809e-12	37	2	96814660	2	96178387	R			NA	NA				chr2:96810443-96811454	S_Shelf		DMR	NA		2:96813678-96814773	Promoter_Associated	TRUE
cg07869023	-0.0524982	0.0110999	3.59362e-06	62	455	-0.0264703	0.00506218	1.89806e-07	1840	-0.0229728	0.00519562	1.04147e-05	68	0.00601437	0.000133643	-0.0280022	0.00365673	-7.65771	1.89274e-14	0.0589791	0.00601437	0.000133643	7.69736e-12	37	20	17212376	20	17160376	F			NA	NA	PCSK2	NM_002594	Body	chr20:17208550-17208756	S_Shelf			NA				NA
cg13442709	-0.0169754	0.0030936	9.23994e-08	62	455	-0.0186826	0.0026844	4.725e-12	1840	-0.0043237	0.00151772	0.00444064	68	0.00175688	0.0138549	-0.0101671	0.00132775	-7.65738	1.8976e-14	2.29593e-06	0.00175688	0.0138549	7.71008e-12	37	9	71334425	9	70524245	F	rs78850632		NA	NA	PIP5K1B	NM_003558	5'UTR					TRUE				NA
cg16664617	-0.0230268	0.00672369	0.000708939	62	455	-0.0213093	0.00429025	7.43246e-07	1840	-0.0203016	0.00371183	5.18161e-08	68	0.00429676	2.30283e-06	-0.0211823	0.00276697	-7.65539	1.92725e-14	0.942636	0.00429676	2.30283e-06	7.82341e-12	37	19	17607007	19	17468007	R			NA	NA	SLC27A1	NM_198580	Body	chr19:17607983-17608406	N_Shore			NA		19:17606918-17607577	Unclassified	NA
cg09276451	-0.029897	0.00841521	0.00044823	62	455	-0.03527	0.00581778	1.62255e-09	1840	-0.0206261	0.00505969	4.77998e-05	68	0.00585701	0.000428931	-0.0283657	0.00370582	-7.65437	1.94259e-14	0.203144	0.00585701	0.000428931	7.8731e-12	37	16	4421603	16	4361604	R			NA	TRUE	VASN;CORO7	NM_138440;NM_024535	TSS1500;Body	chr16:4421642-4422240	N_Shore			NA		16:4421216-4422699	Unclassified_Cell_type_specific	NA
cg12873476	-0.00995001	0.00863926	0.250433	62	455	-0.0406191	0.00613787	4.7679e-11	1840	-0.0321151	0.00593019	6.97642e-08	68	0.00686469	2.89255e-06	-0.0309503	0.00404349	-7.65434	1.94302e-14	0.0148536	0.00686469	2.89255e-06	7.8731e-12	37	8	142402728	8	142471910	R			NA	NA				chr8:142401533-142402494	S_Shore			TRUE	8:142470754-142471911	8:142401151-142402897	Promoter_Associated	NA
cg15773539	-0.0224371	0.00521438	2.3425e-05	62	455	-0.0217878	0.00401079	6.30371e-08	1840	-0.0134903	0.00315069	1.95735e-05	68	0.00364719	0.000216589	-0.0183425	0.00239649	-7.65389	1.94995e-14	0.209671	0.00364719	0.000216589	7.89403e-12	37	17	61520112	17	58873844	R			NA	NA	CYB561;CYB561	NM_001017916;NM_001915	5'UTR;5'UTR	chr17:61523000-61524470	N_Shelf			NA		17:61519866-61520307	Unclassified_Cell_type_specific	TRUE
cg02597894	-0.0238918	0.00646206	0.000262903	62	455	-0.0292295	0.00457641	2.13707e-10	1840	-0.0144043	0.00409866	0.000452233	68	0.00474454	0.00239767	-0.022457	0.0029346	-7.65247	1.97152e-14	0.0773036	0.00474454	0.00239767	7.97411e-12	37	6	31760796	6	31868775	R			NA	NA	VARS	NM_006295	Body	chr6:31763240-31763905	N_Shelf			NA				NA
cg23999170	-0.0308296	0.00715336	2.27527e-05	62	455	-0.0329297	0.0059587	3.73696e-08	1840	-0.0214837	0.00552272	0.00010405	68	0.00639301	0.000778006	-0.0284808	0.00372228	-7.65144	1.98738e-14	0.39393	0.00639301	0.000778006	8.03099e-12	37	1	115628111	1	115429634	F	rs77284491		NA	NA	TSPAN2	NM_005725	Body	chr1:115631850-115632584	N_Shelf			NA				NA
cg19200592	-0.017421	0.00674487	0.0103139	62	455	-0.0471541	0.00740214	2.37703e-10	1840	-0.0343935	0.00661334	2.22471e-07	68	0.00765549	7.03424e-06	-0.0319468	0.00417774	-7.64691	2.05864e-14	0.0113281	0.00765549	7.03424e-06	8.31141e-12	37	3	32877042	3	32852046	F			NA	NA	TRIM71	NM_001039111	Body					TRUE				NA
cg21524899	-0.00703022	0.00550621	0.202753	62	455	-0.0227478	0.00426527	1.08374e-07	1840	-0.0202099	0.00299548	2.06119e-11	68	0.00346752	5.59836e-09	-0.0184847	0.00241741	-7.64651	2.06506e-14	0.061603	0.00346752	5.59836e-09	8.32979e-12	37	1	225662606	1	223729229	R			NA	NA				chr1:225662765-225663041	N_Shore			NA		1:225662106-225663418	Unclassified	NA
[truncated: 4,392 more rows]

## Sheet: Supplementary Table 2
CpG	beta.chs	se.chs	p.chs	nCase.chs	N.chs	beta.aric	se.aric	p.aric	beta.jhs	se.jhs	p.jhs	nCase.jhs	se.adj.jhs	p.adj.jhs	all.TE.fixed	all.seTE.fixed	all.zval.fixed	all.pval.fixed	all.I2	all.Q	all.heterogeneity.p	FDR.fixed	Genome_Build	CHR	MAPINFO	Chromosome_36	Coordinate_36	Strand	Probe_SNPs	Probe_SNPs_10	Random_Loci	Methyl27_Loci	UCSC_RefGene_Name	UCSC_RefGene_Accession	UCSC_RefGene_Group	UCSC_CpG_Islands_Name	Relation_to_UCSC_CpG_Island	Phantom	DMR	Enhancer	HMM_Island	Regulatory_Feature_Name	Regulatory_Feature_Group	DHS
[truncated: 5,065 more rows]

[truncated: 12 more sheets: Supplementary Table 3, Supplementary Table 4, Supplementary Table 5, Supplementary Table 6, Supplementary Table 7, Supplementary Table 8, Supplementary Table 9, Supplementary Table 10, Supplementary Table 11, Supplementary Table 12, Supplementary Table 13, MR_update_eQTM]
