# Supplementary material for: Epigenome-wide DNA Methylation Association Study of CHIP Provides Insight into Perturbed Gene Regulation
Source: Research Square preprint supplement (doi:10.21203/rs.3.rs-4656898/v1), 2024-07-16
Supplement: Supplementary file 2 [file 41a2ea71ae2a8a9d7203936f.docx]

**Supplementary Files**

c.

b.

a.

*TET2* CHIP

*DNMT3A* CHIP

Any CHIP


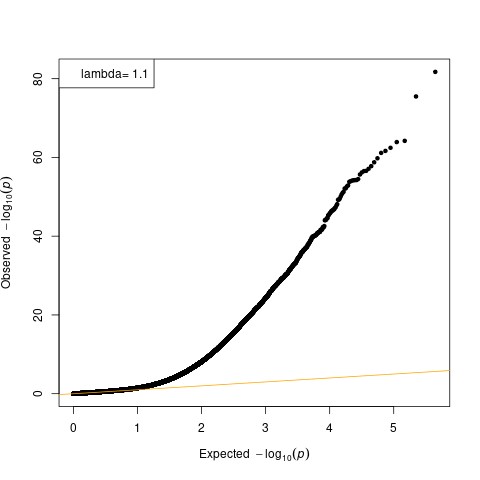

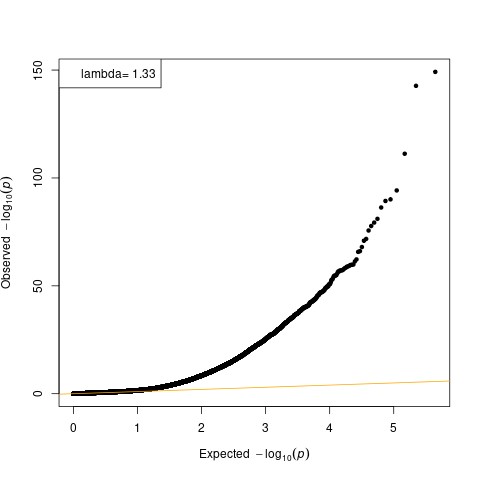

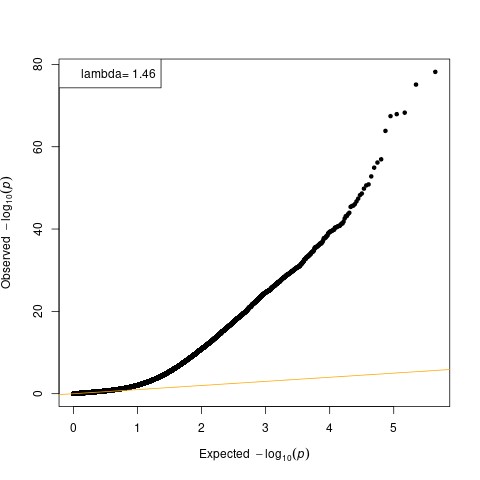


d.

*ASXL1* CHIP


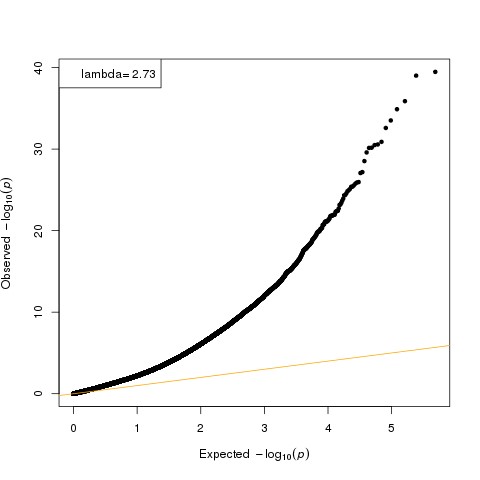


**Supplementary Figure 1: Quantile-quantile plots in multiracial meta-EWAS of CHIP and CHIP subtypes.** Genomic inflation factors were computed for the meta-EWAS of any CHIP and CHIP subtypes. (a) λ = 1.46 for any CHIP, (b) λ = 1.33 for *DNMT3A* CHIP, (c) λ = 1.1 for *TET2* CHIP, and (d) λ = 2.73 for *ASXL1* CHIP.

a.

c.

b.


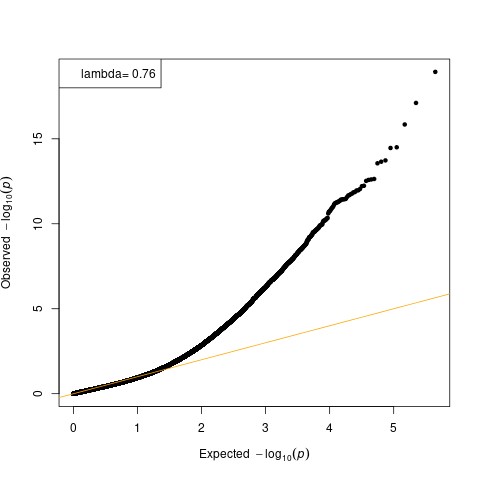

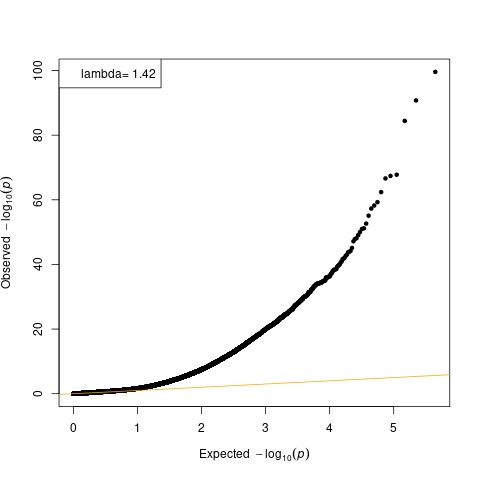

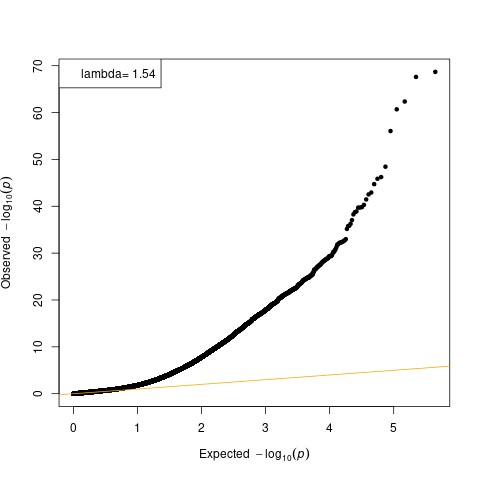


*TET2* CHIP

*DNMT3A* CHIP

Any CHIP

**Supplementary Figure 2. Quantile-quantile plots in CHIP meta EWAS of Black participants.** Genomic inflation factors were computed for the meta-EWAS of any CHIP and CHIP subtypes in Black participants. (a) λ = 1.54 for any CHIP, (b) λ = 1.42 for *DNMT3A* CHIP, (c) λ = 0.76 for *TET2* CHIP.

c.

b.

a.

Any CHIP

*TET2* CHIP

*DNMT3A* CHIP


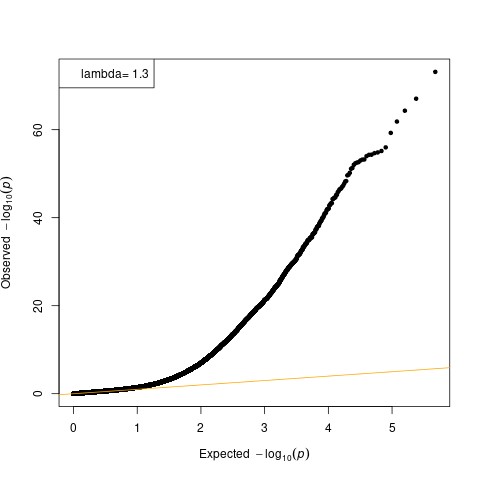

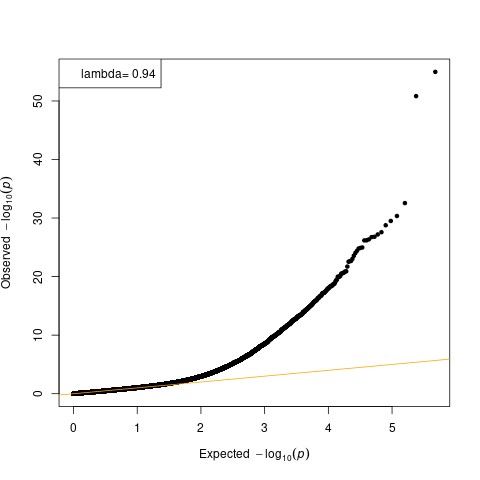

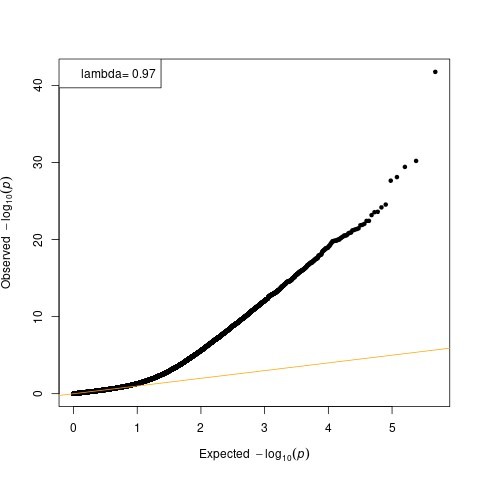


**Supplementary Figure 3. Quantile-quantile plots in CHIP meta EWAS of White participants.** Genomic inflation factors were computed for the meta-EWAS of any CHIP and CHIP subtypes in White participants. (a) λ = 0.97 for any CHIP, (b) λ = 0.94 for *DNMT3A* CHIP, (c) λ = 1.3 for *TET2* CHIP.

b.

a.


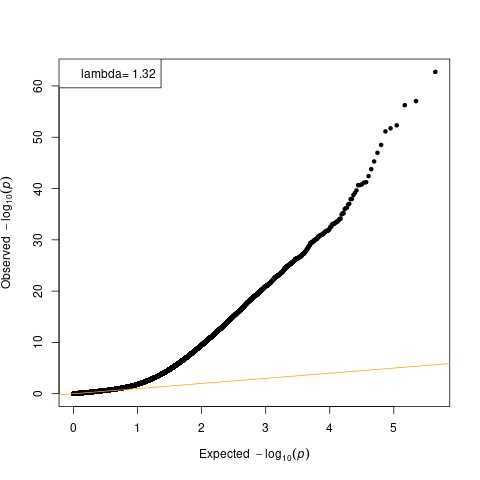


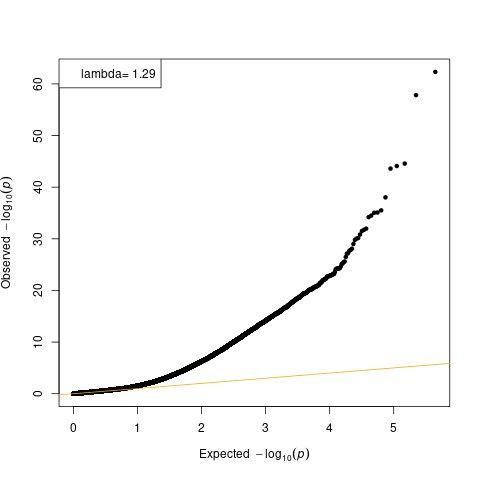


c.


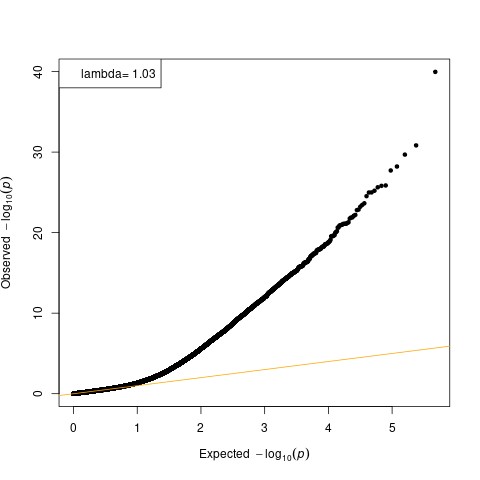


**Supplementary Figure 4. Quantile-quantile plots for meta-EWAS of any CHIP with VAF > 10%.** Genomic inflation factors were computed for the meta-EWAS of any CHIP with VAF > 10% in (a) all races: λ = 1.32, (b) in Black participants: λ = 1.29, (c) in White participants: λ = 1.03.


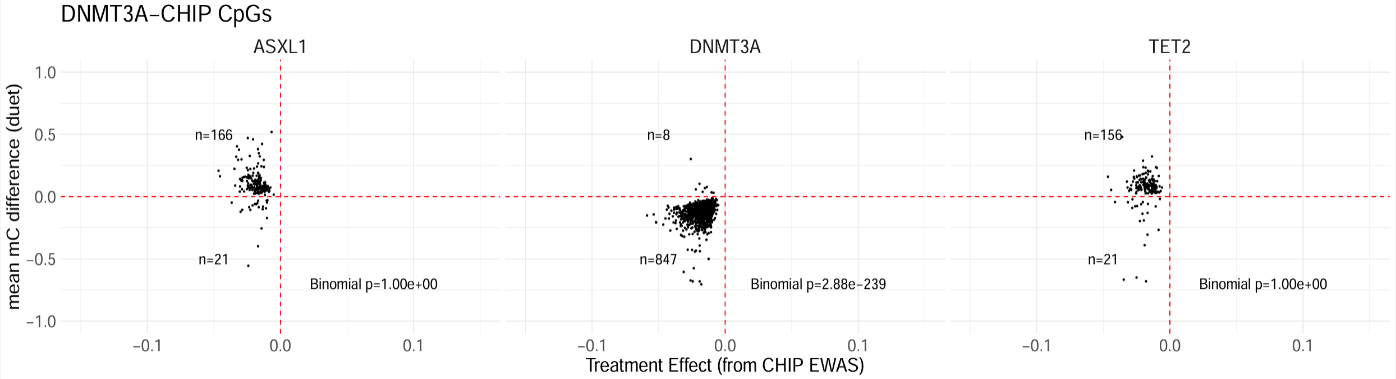

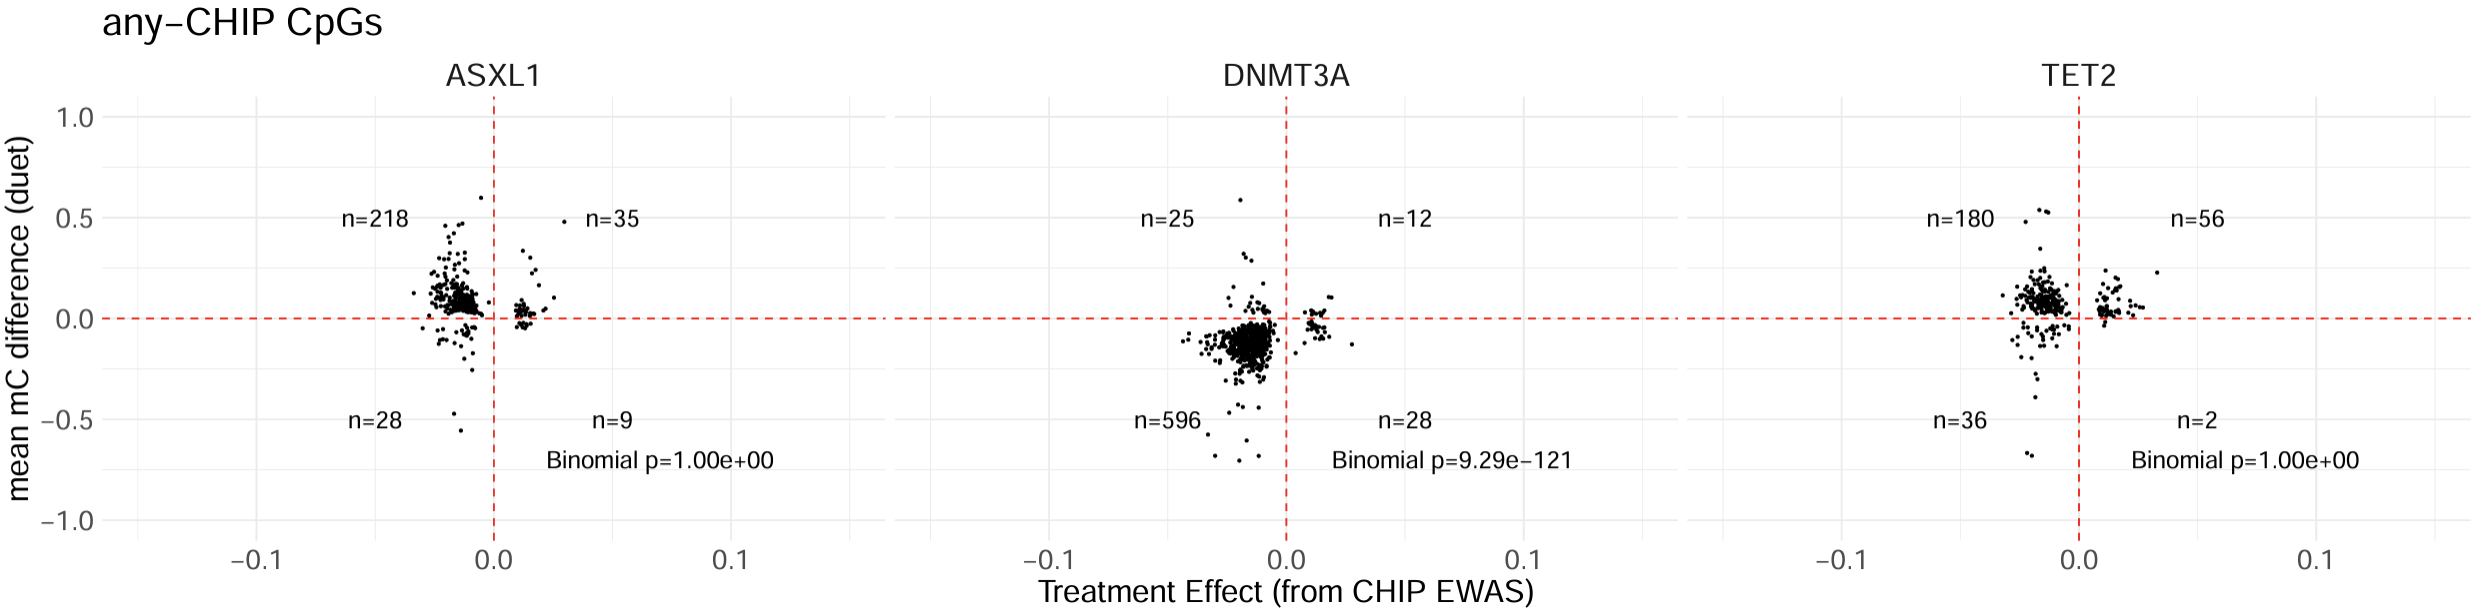

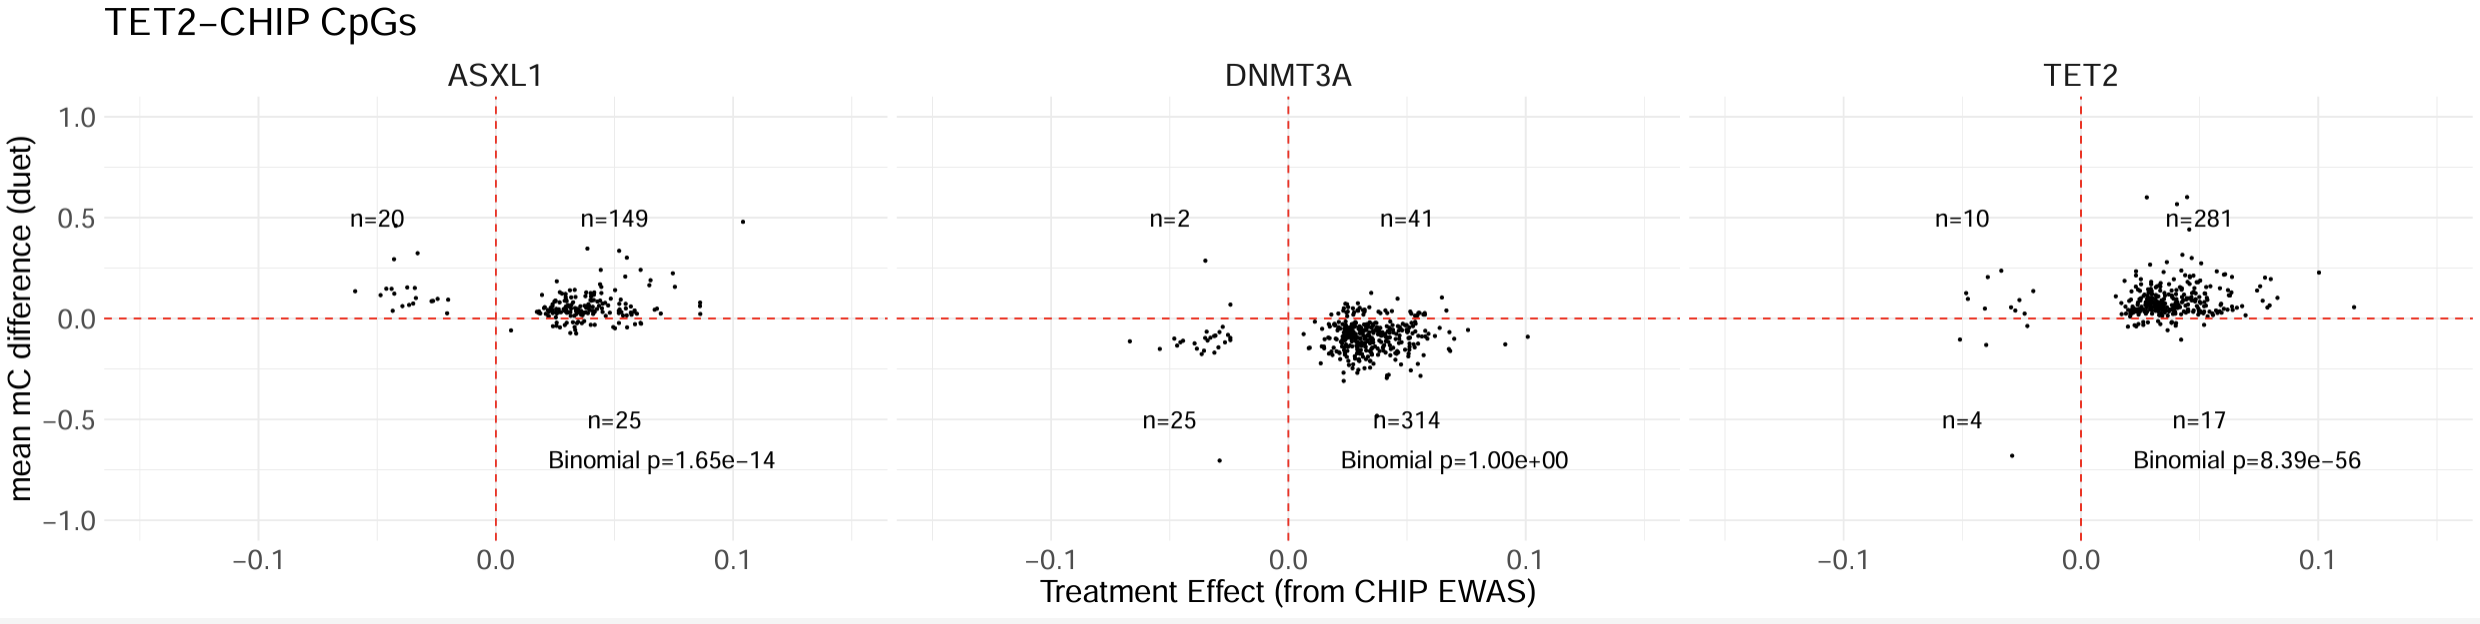

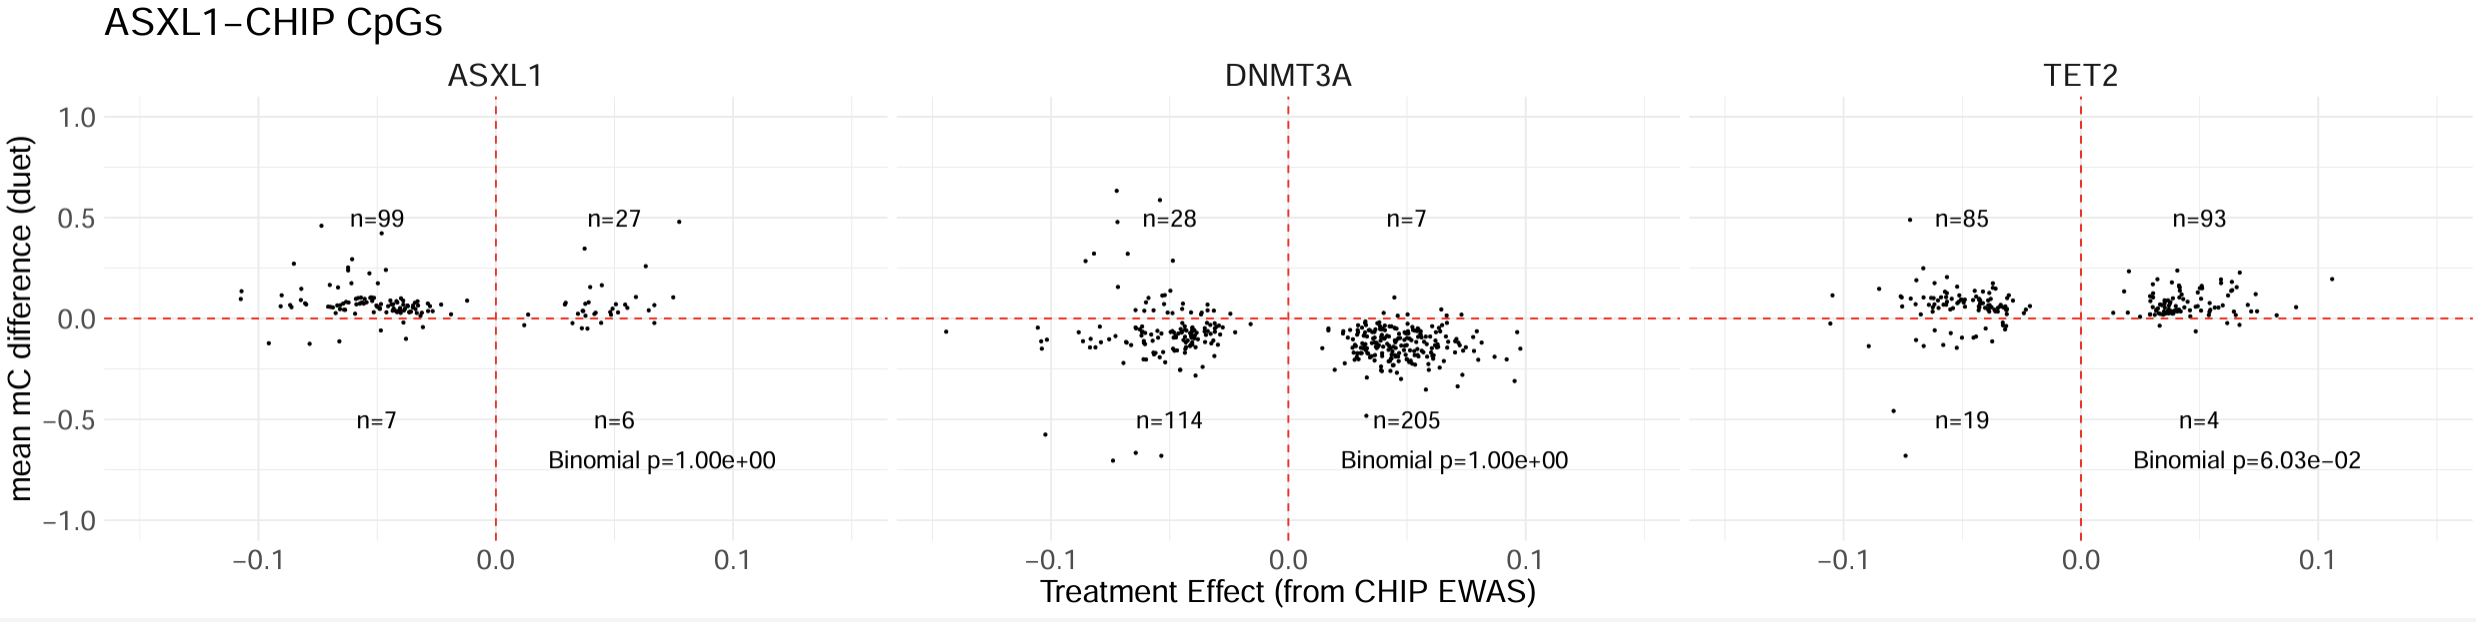


Supplementary Figure 5. **Correlation of CpG Sites in Engineered Human Stem Cells**

Dot plots of methylation status from -1.0 (no methylation) to 1.0 (complete methylation) seen in engineered primary cell cultures compared to correlation of EWAS results ranging from -0.1 to 0.1. Significance was determined with a binomial test. A) Comparison of any CHIP CpG sites compared to each engineered cell line. B) Comparison of DNMT3A-CHIP CpG sites compared to each engineered cell culture. C) Comparison of TET2-CHIP CpG sites compared to each engineered cell culture. D) Comparison of ASXL-1 CHIP CpG site compared to each engineered cell culture.


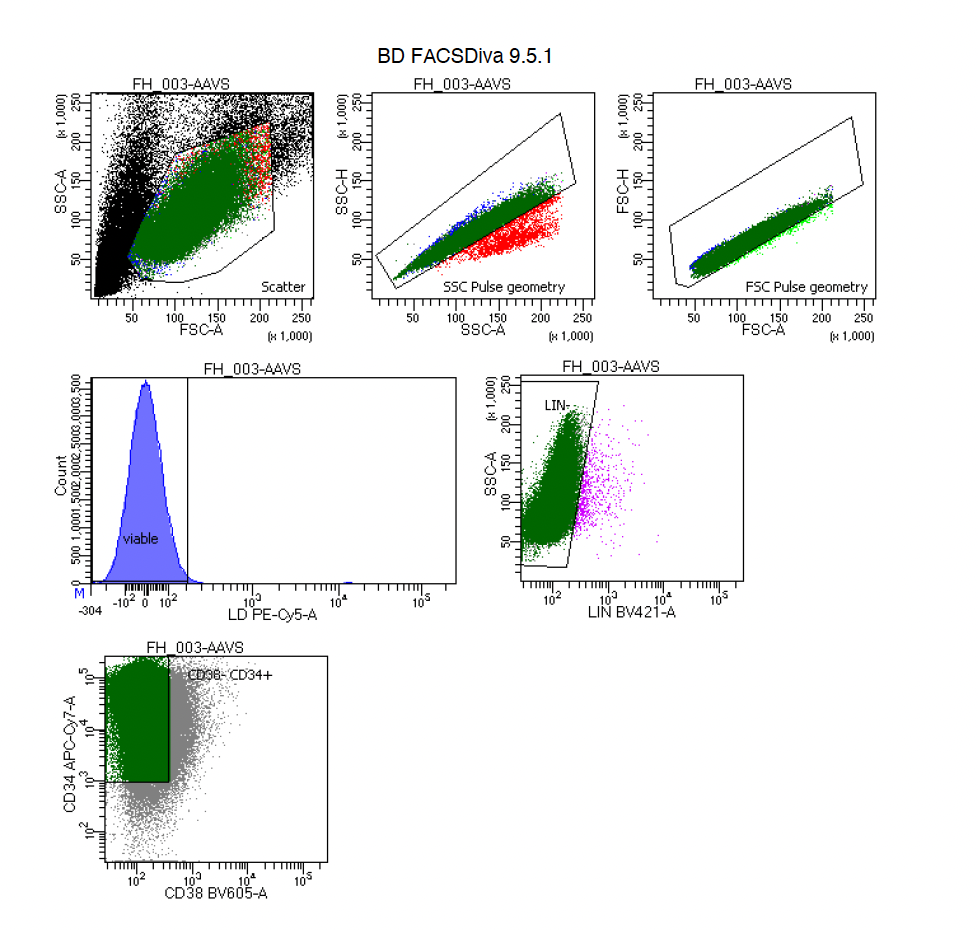


Supplementary Figure 6. **Representative Fluorescent Activated Cell** **Sorting**

Flow gating strategy for sorting human hematopoietic stem cells using 7-AAD (live/dead stain), CD34+ (APC-Cy7), CD38- (BV605), and Lineage- (Pacific Blue).


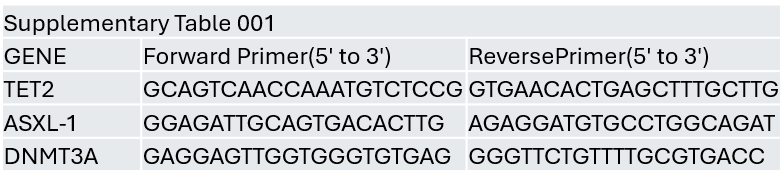

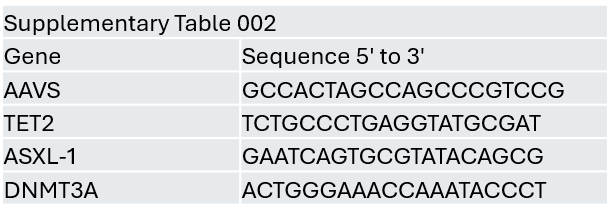

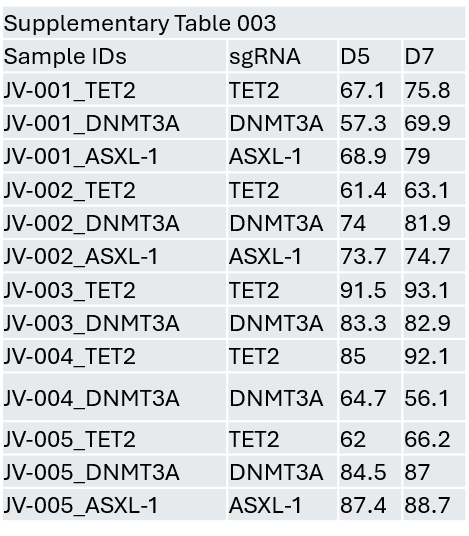


Supplementary Figure 7. Primer sequences for assessing indel formation present in each sgRNA.

Supplementary Figure 8. **Single guide RNA sequences**

SgRNA sequences for each guide RNA targeting AAVS, TET2, ASXL1, and DNMT3A.

Supplementary Figure 9. Indel Formation

TIDE results assessing indel formation from the various sgRNAs (seen in supplementary table 002) at Day 5(D5) and Day 7(D7) post knockout with CRISPR-Cas9. Each PCR product was amplified with primer sequences seen in supplementary table 001 compared to either scramble or AAVS control samples towards each of the following sgRNAs.


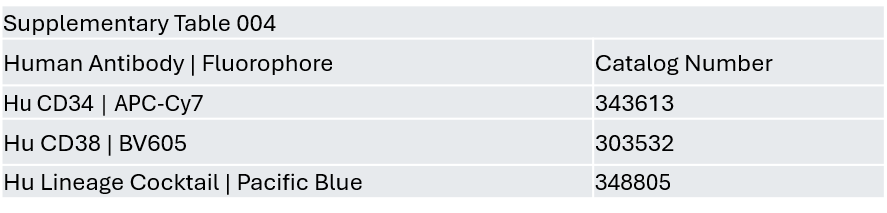


Supplementary Figure 10. Human Antibodies

Human Antibodies used towards CD34, CD38 and Lineage cocktail all from Biolegend.

.

**Supplementary Table 004: Human Antibodies**

Human Antibodies used towards CD34, CD38 and Lineage cocktail all from Biolegend.
