# Supplementary material for: Epigenome-wide DNA Methylation Association Study of CHIP Provides Insight into Perturbed Gene Regulation
Source: Research Square preprint supplement (doi:10.21203/rs.3.rs-4656898/v1), 2024-07-16
Supplement: Supplementary file 3 [file 4a2e756c4629267a083cc532.xlsx]

## Sheet: Supplementary Table 14
Term	Count	%	PValue	Genes	List Total	Pop Hits	Pop Total	Fold Enrichment	Bonferroni	Benjamini	FDR
GO:0045944~positive regulation of transcription from RNA polymerase II promoter	48	13.9535	7.22e-08	YAP1, HLF, CHD6, AGAP2, NRL, GATA3, PIK3R1, NR3C1, PTMS, LRP6, MLLT6, HOXA10, ZNF609, RXRA, ZMIZ1, PRDM16, HSF4, HOXA7, PPARGC1B, BCL9L, FOXD2, ZFHX3, ZBTB16, ARID5A, NR1H3, HMGA2, FOXJ1, GRHL3, NFATC1, NR1D2, INHBA, FLI1, RUNX2, ELL3, HIPK2, SKI, BMP2, MYCN, PRPF6, TCEA2, HOXB3, HOXB2, ERG, MAML3, EZH1, HOXB5, BMPR1A, TP73	323	1232	19453	2.34647	0.00016	0.00016	0.00016
GO:0045893~positive regulation of transcription, DNA-templated	32	9.30233	1.6e-06	CDKN1C, YAP1, SRC, GATA3, PRDM11, LRP6, CAND2, PDLIM1, RAI1, MTA1, RXRA, PRDM16, HIVEP3, ATXN7L3, NFE2, ZFHX3, AFAP1L2, ZBTB16, NR1H3, HMGA2, NFATC1, NR1D2, INHBA, TGFBR1, FLI1, RUNX2, HIPK2, BMP2, MYCN, TRIM15, PLCB1, TP73	323	728	19453	2.6473	0.0035453	0.0017758	0.0017726
GO:0045892~negative regulation of transcription, DNA-templated	26	7.55814	1.9e-05	CDKN1C, SRC, BHLHE41, GATA3, PRDM11, NR3C1, MTA1, PRDM16, HOXA7, PPARGC1B, SAMD11, TLE2, ZBTB16, ADIPOQ, DNMT3A, ARID5A, HMGA2, NR1D2, PEX14, RUNX2, NCOR2, BMP2, NOSTRIN, PLCB1, TRIM11, VGLL4	323	591	19453	2.64954	0.0413793	0.0140865	0.0140611
GO:0007275~multicellular organism development	12	3.48837	2.85e-05	NTRK1, HOXA10, NFE2, HLF, ERBB3, TIE1, GPR65, INSRR, HOXB2, PDCD1, EPHA2, IGF1R	323	144	19453	5.01883	0.0614583	0.0158568	0.0158283
GO:0009952~anterior/posterior pattern specification	9	2.61628	0.000208	HOXA10, ZBTB16, BHLHE41, HOXB3, HOXB2, HOXA7, TGFBR1, HIPK2, HOXB5	323	97	19453	5.58798	0.370563	0.0925762	0.0924097
GO:0000122~negative regulation of transcription from RNA polymerase II promoter	33	9.59302	0.000379	CDKN1C, YAP1, BHLHE41, GATA3, NR3C1, MTA1, ZNF608, RXRA, PRDM16, BEND3, HSF4, DNMT3B, HOXA7, FNIP2, ZNF366, DACT1, TGIF1, ZFHX3, KDM2B, ZBTB16, DNMT3A, ARID5A, NR1H3, HMGA2, FOXJ1, NR1D2, HIPK2, NR2F6, NCOR2, SKI, BMP2, HOXB3, EZH1	323	1016	19453	1.95616	0.570014	0.14064	0.140387
GO:0031532~actin cytoskeleton reorganization	7	2.03488	0.000464	MKLN1, CDC42BPG, GPR65, INSRR, GAB1, CDC42BPB, PDLIM4	323	60	19453	7.02637	0.643427	0.147283	0.147018
GO:0007165~signal transduction	38	11.0465	0.00100577	GUCY2D, IRS1, SRC, SH2D2A, GATA3, PIK3R1, NR3C1, SHB, IGF1R, SYDE2, MTA1, ERBB3, GRK5, RASSF4, SH3BP5, LRRC8D, MAP3K6, PDE8A, ANKDD1A, TLE2, TIE1, ADIPOQ, GAB1, CDC42BPB, RHOC, GFRA3, TGFBR1, FNDC5, SIGIRR, INPP4A, MKLN1, TOM1L2, TYROBP, STK24, NOSTRIN, RGS12, ERG, PLCB1	323	1307	19453	1.75102	0.893324	0.279604	0.279101
GO:0042060~wound healing	8	2.32558	0.00121897	YAP1, MACF1, ERBB3, TPM1, NFATC1, SCRIB, GRHL3, TGFBR1	323	98	19453	4.91641	0.933638	0.299713	0.299174
GO:0007179~transforming growth factor beta receptor signaling pathway	8	2.32558	0.00162785	SKI, CLDN5, SRC, ZMIZ1, LRRC32, TGFBR1, BMPR1A, HIPK2	323	103	19453	4.67775	0.973305	0.299713	0.299174
GO:0048009~insulin-like growth factor receptor signaling pathway	5	1.45349	0.00162923	IRS1, CRIM1, PIK3R1, PLCB1, IGF1R	323	31	19453	9.71387	0.973387	0.299713	0.299174
GO:0030036~actin cytoskeleton organization	12	3.48837	0.00174779	PDLIM1, MKLN1, TYROBP, IQSEC1, CDC42BPG, INSRR, AGAP2, FOXJ1, AMOTL1, CDC42BPB, SPTB, PDLIM4	323	232	19453	3.11514	0.979565	0.299713	0.299174
GO:0072659~protein localization to plasma membrane	10	2.90698	0.00175192	GAK, CACNB3, RAB40C, PACS2, PALM, ADIPOQ, FLOT1, ATP1B1, EPHA2, LRP6	323	165	19453	3.65006	0.979752	0.299713	0.299174
GO:0007169~transmembrane receptor protein tyrosine kinase signaling pathway	9	2.61628	0.00203966	NTRK1, EFS, ERBB3, SRC, TIE1, INSRR, SAMD10, EPHA2, IGF1R	323	137	19453	3.95645	0.989335	0.324014	0.323432
GO:0002062~chondrocyte differentiation	6	1.74419	0.00230653	BMP2, ARID5A, HMGA2, PTH1R, RUNX2, BMPR1A	323	56	19453	6.45279	0.994117	0.341981	0.341366
GO:0010628~positive regulation of gene expression	19	5.52326	0.00266962	YAP1, MIR130A, NRL, HMGA2, GRHL3, INHBA, LRRC32, CLU, TGFBR1, RUNX2, CLDN5, BMP2, MYCN, TYROBP, ERBB3, KCNQ1OT1, DNMT3B, ATP13A2, BMPR1A	323	519	19453	2.20481	0.997382	0.371077	0.37041
GO:0007188~adenylate cyclase-modulating G-protein coupled receptor signaling pathway	6	1.74419	0.00290387	GNAO1, GRK5, ADORA2A, AVPR1B, GNA12, PTH1R	323	59	19453	6.12468	0.998447	0.3767	0.376022
GO:0060065~uterus development	4	1.16279	0.00304883	CDKN1C, HOXA10, SRC, GATA3	323	18	19453	13.3836	0.998876	0.3767	0.376022
GO:0014065~phosphatidylinositol 3-kinase signaling	5	1.45349	0.00349075	ERBB3, IRS1, GATA3, PIK3R1, IGF1R	323	38	19453	7.92447	0.999581	0.408601	0.407866
GO:0007010~cytoskeleton organization	9	2.61628	0.00418691	FMNL1, ABLIM1, MAST4, MAST3, TPM1, PALM, MICAL3, FITM2, CDC42BPB	323	154	19453	3.5197	0.999911	0.449282	0.448473
GO:0035556~intracellular signal transduction	17	4.94186	0.00459039	MAST4, MAST3, SRC, CDC42BPG, HMGA2, NFATC1, CDC42BPB, TGFBR1, CAMKK1, PINK1, EFS, TYROBP, RAB40C, MCF2L, SH3BP5, PLCB1, TNS3	323	462	19453	2.21611	0.999964	0.449282	0.448473
GO:0060021~palate development	6	1.74419	0.0047204	SKI, CLDN5, INHBA, ANP32B, TGFBR1, BMPR1A	323	66	19453	5.47509	0.999973	0.449282	0.448473
GO:0006357~regulation of transcription from RNA polymerase II promoter	44	12.7907	0.00500312	HLF, SP140, BHLHE41, NRL, JMJD1C, NR3C1, MLLT6, HOXA10, PDLIM1, RAI1, ZNF609, ZNF608, RXRA, ZMIZ1, PRDM16, HSF4, HIVEP3, HOXA7, ATXN7L3, ZNF366, TGIF1, ABCA2, NFE2, FOXD2, ZFHX3, KDM2B, ZBTB16, ARID5A, FOXJ1, GRHL3, NFATC1, INHBA, FLI1, RUNX2, NR2F6, NCOR2, MYCN, LBX2, HOXB3, HOXB2, ERG, ZNF710, HOXB5, TP73	323	1736	19453	1.52647	0.999986	0.449282	0.448473
GO:0038083~peptidyl-tyrosine autophosphorylation	4	1.16279	0.00547963	NTRK1, SRC, AATK, IGF1R	323	22	19453	10.9502	0.999995	0.449282	0.448473
GO:0090630~activation of GTPase activity	8	2.32558	0.00571613	SYDE2, RAP1GAP2, RCC2, GPR65, AGAP2, FOXJ1, SCRIB, EPHA2	323	129	19453	3.73495	0.999997	0.449282	0.448473
GO:0043524~negative regulation of neuron apoptotic process	9	2.61628	0.00587108	NTRK1, PINK1, ERBB3, ADORA2A, KDM2B, PLXND1, AGAP2, CLU, HIPK2	323	163	19453	3.32536	0.999998	0.449282	0.448473
GO:0048488~synaptic vesicle endocytosis	5	1.45349	0.00594139	DENND1A, TBC1D24, SCRIB, CEL, SYNJ2	323	44	19453	6.84386	0.999998	0.449282	0.448473
GO:0048704~embryonic skeletal system morphogenesis	5	1.45349	0.00594139	HOXB3, HOXB2, HOXA7, DSCAML1, HOXB5	323	44	19453	6.84386	0.999998	0.449282	0.448473
GO:0071560~cellular response to transforming growth factor beta stimulus	6	1.74419	0.00606045	CLEC3B, MIR130A, NFATC1, NR3C1, TGFBR1, IGF1R	323	70	19453	5.16223	0.999999	0.449282	0.448473
GO:0060395~SMAD protein signal transduction	6	1.74419	0.00606045	SKI, BMP2, ZMIZ1, INHBA, RUNX2, HIPK2	323	70	19453	5.16223	0.999999	0.449282	0.448473
GO:0033674~positive regulation of kinase activity	6	1.74419	0.00682186	NTRK1, ERBB3, TIE1, INSRR, EPHA2, IGF1R	323	72	19453	5.01883	1	0.482558	0.48169
GO:0001501~skeletal system development	8	2.32558	0.00700338	CDKN1C, HOXA10, RAI1, BMP2, CHRD, PTH1R, TGFBR1, EPHA2	323	134	19453	3.59558	1	0.482558	0.48169
GO:0048762~mesenchymal cell differentiation	3	0.872093	0.00716026	BMP2, HMGA2, TGFBR1	323	8	19453	22.5848	1	0.482558	0.48169
GO:0006468~protein phosphorylation	16	4.65116	0.00739784	NTRK1, SRC, CDC42BPG, AATK, CDC42BPB, PIK3R1, TGFBR1, HIPK2, BMP2, PINK1, STK24, GRK5, ERG, MAP3K6, FNIP2, BMPR1A	323	444	19453	2.17031	1	0.483906	0.483036
GO:0032092~positive regulation of protein binding	6	1.74419	0.00764778	CLDN5, BMP2, PLXND1, FLOT1, HIPK2, DACT1	323	74	19453	4.88319	1	0.485962	0.485088
GO:0048589~developmental growth	4	1.16279	0.00789035	ZMIZ1, GATA3, BMPR1A, STRA6	323	25	19453	9.63616	1	0.487448	0.486571
GO:0007049~cell cycle	14	4.06977	0.00828385	CDKN1C, SRC, RCC2, MICAL3, CABLES1, HMGA2, NR3C1, PARD3B, GAK, RASSF4, EPB41L2, KIF13A, TP73, BANP	323	366	19453	2.30373	1	0.497926	0.497031
GO:0007599~hemostasis	3	0.872093	0.00910589	NFE2, VWF, FLI1	323	9	19453	20.0753	1	0.532935	0.531976
GO:0016310~phosphorylation	12	3.48837	0.00949977	GAK, RPS6KL1, TRIO, ERBB3, MAST4, MAST3, TIE1, AATK, AK5, CAMKK1, EPHA2, MYLK4	323	291	19453	2.48355	1	0.54173	0.540756
GO:0009968~negative regulation of signal transduction	5	1.45349	0.00999608	RGS19, ERBB3, UBASH3B, RGS12, DACT1	323	51	19453	5.90451	1	0.555782	0.554782
GO:0060391~positive regulation of SMAD protein import into nucleus	4	1.16279	0.0108365	BMP2, INHBA, TGFBR1, BMPR1A	323	28	19453	8.60372	1	0.577056	0.576018
GO:0043491~protein kinase B signaling	6	1.74419	0.0110838	ERBB3, IRS1, GATA3, PIK3R1, EPHA2, IGF1R	323	81	19453	4.46119	1	0.577056	0.576018
GO:0043583~ear development	3	0.872093	0.0112587	ECE1, GATA3, STRA6	323	10	19453	18.0678	1	0.577056	0.576018
GO:1902895~positive regulation of pri-miRNA transcription from RNA polymerase II promoter	5	1.45349	0.0114166	BMP2, MYCN, GATA3, NR3C1, BMPR1A	323	53	19453	5.6817	1	0.577056	0.576018
GO:0007417~central nervous system development	8	2.32558	0.0117469	SEMA6B, TRIO, ADORA2A, B3GNT5, ZBTB16, GRHL3, MSI2, DSCAML1	323	148	19453	3.25546	1	0.580556	0.579512
GO:0008360~regulation of cell shape	8	2.32558	0.0130079	MKLN1, FMNL1, PLXND1, TPM1, GNA12, PALM, RHOC, MYH10	323	151	19453	3.19078	1	0.628903	0.627772
GO:0055088~lipid homeostasis	5	1.45349	0.0137803	ACOX2, NR1H3, NR1D2, FITM2, ATP13A2	323	56	19453	5.37732	1	0.652071	0.650899
GO:0001822~kidney development	7	2.03488	0.0143282	CDKN1C, PLXND1, TRAF3IP1, GATA3, TGFBR1, TP73, STRA6	323	119	19453	3.54271	1	0.663874	0.662679
GO:0007015~actin filament organization	8	2.32558	0.0148369	SAMD14, TPM4, TPM1, NOSTRIN, CORO7, RHOC, PPP1R9A, PPARGC1B	323	155	19453	3.10844	1	0.673413	0.672202
GO:0071773~cellular response to BMP stimulus	4	1.16279	0.0169881	BMP2, GATA3, RUNX2, BMPR1A	323	33	19453	7.30012	1	0.735553	0.73423
GO:0009410~response to xenobiotic stimulus	11	3.19767	0.0174332	NTRK1, TGIF1, ABCA2, ADORA2A, SRC, GNA12, DNMT3A, GATA3, INHBA, ACACB, TP73	323	277	19453	2.39165	1	0.735553	0.73423
GO:0030154~cell differentiation	21	6.10465	0.0178507	SEMA6B, NTRK1, FOXD2, USP42, SRC, SH2D2A, NR1H3, NR1D2, CEL, GATA3, INHBA, SHB, KAZALD1, APOLD1, FLI1, NR2F6, NHSL1, RXRA, GNA12, ERG, AHDC1	323	723	19453	1.7493	1	0.735553	0.73423
GO:0045599~negative regulation of fat cell differentiation	5	1.45349	0.0183684	YAP1, BMP2, TRIO, ADIPOQ, GATA3	323	61	19453	4.93656	1	0.735553	0.73423
GO:0031032~actomyosin structure organization	4	1.16279	0.0184086	EPB41L2, CDC42BPG, CDC42BPB, MYH10	323	34	19453	7.08541	1	0.735553	0.73423
GO:0008015~blood circulation	4	1.16279	0.0184086	ADORA2A, ELN, HOXB2, FLI1	323	34	19453	7.08541	1	0.735553	0.73423
GO:0045056~transcytosis	3	0.872093	0.0188877	SRC, RAB17, IGF1R	323	13	19453	13.8983	1	0.735553	0.73423
GO:0048680~positive regulation of axon regeneration	3	0.872093	0.0188877	STK24, SCARF1, IGF1R	323	13	19453	13.8983	1	0.735553	0.73423
GO:0007596~blood coagulation	6	1.74419	0.0191826	GP9, ADORA2A, VWF, GNA12, JMJD1C, ANO6	323	93	19453	3.88555	1	0.735553	0.73423
GO:0003180~aortic valve morphogenesis	4	1.16279	0.0214416	TIE1, ELN, NFATC1, GATA3	323	36	19453	6.69178	1	0.807965	0.806511
GO:0061029~eyelid development in camera-type eye	3	0.872093	0.0217976	GRHL3, INHBA, STRA6	323	14	19453	12.9056	1	0.807965	0.806511
GO:0043410~positive regulation of MAPK cascade	8	2.32558	0.0246723	NTRK1, BMP2, AVPR1B, MADD, LPAR3, TGFBR1, IGF1R, TP73	323	172	19453	2.80121	1	0.886475	0.88488
GO:0048469~cell maturation	4	1.16279	0.0247313	FOXJ1, GATA3, PTH1R, RUNX2	323	38	19453	6.33958	1	0.886475	0.88488
GO:0043065~positive regulation of apoptotic process	12	3.48837	0.0251115	BMP2, SRC, ADAMTSL4, ZBTB16, HMGA2, SCRIB, BMF, ANO6, PDCD1, CLU, TGFBR1, TP73	323	336	19453	2.15093	1	0.886475	0.88488
GO:0051301~cell division	13	3.77907	0.0263722	DCTN1, RCC2, MICAL3, CABLES1, HMGA2, PDS5B, NR3C1, PARD3B, RECQL5, CCNY, EPB41L2, KIF13A, MAD1L1	323	383	19453	2.04422	1	0.912484	0.910843
GO:0001525~angiogenesis	10	2.90698	0.0266688	PLXND1, TIE1, SH2D2A, GAB1, HOXB3, AMOTL1, HOXA7, SHB, APOLD1, BMPR1A	323	255	19453	2.3618	1	0.912484	0.910843
GO:0048485~sympathetic nervous system development	3	0.872093	0.0281277	NTRK1, GATA3, GFRA3	323	16	19453	11.2924	1	0.921893	0.920235
GO:0009953~dorsal/ventral pattern formation	4	1.16279	0.0282771	CHRD, HOXB2, DSCAML1, BMPR1A	323	40	19453	6.0226	1	0.921893	0.920235
GO:0001701~in utero embryonic development	9	2.61628	0.0284719	BMP2, ZMIZ1, TIE1, GNA12, GATA3, PTH1R, TGFBR1, CMIP, BMPR1A	323	217	19453	2.49785	1	0.921893	0.920235
GO:0008286~insulin receptor signaling pathway	5	1.45349	0.028784	IRS1, INSRR, GAB1, PIK3R1, IGF1R	323	70	19453	4.30186	1	0.921893	0.920235
GO:0008283~cell proliferation	8	2.32558	0.0290164	YAP1, SRC, SH2D2A, ZBTB16, SCRIB, PTH1R, PDS5B, HIPK2	323	178	19453	2.70679	1	0.921893	0.920235
GO:0007507~heart development	9	2.61628	0.0312495	PDLIM1, BMP2, ERBB3, KCNQ1, FOXJ1, ECE1, PDLIM4, TGFBR1, STRA6	323	221	19453	2.45264	1	0.948299	0.946593
GO:0043116~negative regulation of vascular permeability	3	0.872093	0.0315351	CLDN5, ADORA2A, DDAH1	323	17	19453	10.6281	1	0.948299	0.946593
GO:0060048~cardiac muscle contraction	4	1.16279	0.0320781	KCNQ1, TPM1, ATP1B1, SCN4B	323	42	19453	5.73581	1	0.948299	0.946593
GO:0030177~positive regulation of Wnt signaling pathway	4	1.16279	0.0320781	SKI, MACF1, BMP2, DACT1	323	42	19453	5.73581	1	0.948299	0.946593
GO:0046777~protein autophosphorylation	8	2.32558	0.0321735	NTRK1, GRK5, STK24, SRC, INSRR, ULK3, ATP13A2, IGF1R	323	182	19453	2.6473	1	0.948299	0.946593
GO:0006354~DNA-templated transcription, elongation	2	0.581395	0.0328323	TCEA2, ELL3	323	2	19453	60.226	1	0.948299	0.946593
GO:1901248~positive regulation of lung ciliated cell differentiation	2	0.581395	0.0328323	FOXJ1, TP73	323	2	19453	60.226	1	0.948299	0.946593
GO:0044849~estrous cycle	3	0.872093	0.0350959	NCOR2, OPRL1, IGF1R	323	18	19453	10.0377	1	1	0.99865
GO:0030501~positive regulation of bone mineralization	4	1.16279	0.036132	BMP2, RXRA, ANO6, BMPR1A	323	44	19453	5.47509	1	1	0.99865
GO:0010468~regulation of gene expression	10	2.90698	0.03643	STX1B, DNMT3A, CHD6, DNMT3B, TRIM15, ATP1B1, PRDM11, TRIM11, TGFBR1, TP73	323	270	19453	2.23059	1	1	0.99865
GO:0048863~stem cell differentiation	4	1.16279	0.0382531	HMGA2, HOXA7, RUNX2, ELL3	323	45	19453	5.35342	1	1	0.99865
GO:0030316~osteoclast differentiation	4	1.16279	0.0382531	BMP2, TYROBP, PIK3R1, EPHA2	323	45	19453	5.35342	1	1	0.99865
GO:1902531~regulation of intracellular signal transduction	3	0.872093	0.0388041	TRIO, MCF2L, MCF2L2	323	19	19453	9.50937	1	1	0.99865
GO:0031396~regulation of protein ubiquitination	3	0.872093	0.0388041	PINK1, DCUN1D1, TGFBR1	323	19	19453	9.50937	1	1	0.99865
GO:0043149~stress fiber assembly	3	0.872093	0.0388041	PDLIM1, SRC, ELN	323	19	19453	9.50937	1	1	0.99865
GO:0014068~positive regulation of phosphatidylinositol 3-kinase signaling	5	1.45349	0.0420968	NTRK1, ERBB3, SRC, AGAP2, IGF1R	323	79	19453	3.81177	1	1	0.99865
GO:0034067~protein localization to Golgi apparatus	3	0.872093	0.0426538	GAK, GBP5, BICD2	323	20	19453	9.0339	1	1	0.99865
GO:0060037~pharyngeal system development	3	0.872093	0.0426538	ECE1, GATA3, TGFBR1	323	20	19453	9.0339	1	1	0.99865
GO:0050673~epithelial cell proliferation	4	1.16279	0.0426812	YAP1, ESRP2, RUNX2, BMPR1A	323	47	19453	5.12562	1	1	0.99865
GO:0016055~Wnt signaling pathway	8	2.32558	0.0440317	MACF1, TLE2, GRK5, CCNY, CCDC88C, AMOTL1, LRP6, DACT1	323	195	19453	2.47081	1	1	0.99865
GO:0051091~positive regulation of sequence-specific DNA binding transcription factor activity	6	1.74419	0.0465333	BMP2, PINK1, TRIM15, PPARGC1B, HIPK2, LRP6	323	118	19453	3.06234	1	1	0.99865
GO:0030900~forebrain development	4	1.16279	0.0473542	TYROBP, KDM2B, PCDH9, SRC	323	49	19453	4.91641	1	1	0.99865
GO:0010862~positive regulation of pathway-restricted SMAD protein phosphorylation	4	1.16279	0.0473542	BMP2, INHBA, TGFBR1, BMPR1A	323	49	19453	4.91641	1	1	0.99865
GO:0043585~nose morphogenesis	2	0.581395	0.0488432	SKI, STRA6	323	3	19453	40.1507	1	1	0.99865
GO:0071072~negative regulation of phospholipid biosynthetic process	2	0.581395	0.0488432	ABCA2, SLC27A1	323	3	19453	40.1507	1	1	0.99865
GO:1904059~regulation of locomotor rhythm	2	0.581395	0.0488432	ZFHX3, OPRL1	323	3	19453	40.1507	1	1	0.99865
GO:0032226~positive regulation of synaptic transmission, dopaminergic	2	0.581395	0.0488432	PINK1, FLOT1	323	3	19453	40.1507	1	1	0.99865
GO:0001709~cell fate determination	3	0.872093	0.0507554	PTCH2, GATA3, DSCAML1	323	22	19453	8.21264	1	1	0.99865
GO:0007399~nervous system development	13	3.77907	0.0513099	SEMA6B, NTRK1, NRSN2, DCTN1, CRIM1, CABLES1, INHBA, GDPD5, GFRA3, PPP1R9A, TGFBR1, ERBB3, HOXB2	323	425	19453	1.84221	1	1	0.99865
GO:0008630~intrinsic apoptotic signaling pathway in response to DNA damage	4	1.16279	0.0522678	PIK3R1, FNIP2, EPHA2, TP73	323	51	19453	4.72361	1	1	0.99865
GO:0003151~outflow tract morphogenesis	4	1.16279	0.0522678	CLDN5, PLXND1, ELN, BMPR1A	323	51	19453	4.72361	1	1	0.99865
GO:0050905~neuromuscular process	3	0.872093	0.0549964	DCTN1, KCNQ1, STRA6	323	23	19453	7.85557	1	1	0.99865
GO:0051496~positive regulation of stress fiber assembly	4	1.16279	0.0574171	GPR65, TPM1, RHOC, TGFBR1	323	53	19453	4.54536	1	1	0.99865
GO:0045766~positive regulation of angiogenesis	7	2.03488	0.058274	NTRK1, DDAH1, MIR130A, TIE1, GAB1, HMGA2, HIPK2	323	166	19453	2.53965	1	1	0.99865
GO:0042147~retrograde transport, endosome to Golgi	5	1.45349	0.0583503	GGA1, DCTN1, VTI1A, DENND5A, ERC1	323	88	19453	3.42193	1	1	0.99865
GO:0001649~osteoblast differentiation	6	1.74419	0.0617921	BMP2, TPM4, KCNQ1OT1, RUNX2, BMPR1A, EPHA2	323	128	19453	2.82309	1	1	0.99865
GO:0030218~erythrocyte differentiation	4	1.16279	0.0627968	KCNQ1, GATA3, INHBA, HIPK2	323	55	19453	4.38007	1	1	0.99865
GO:0031334~positive regulation of protein complex assembly	4	1.16279	0.0627968	BMF, RHOC, FNIP2, CLU	323	55	19453	4.38007	1	1	0.99865
GO:0035019~somatic stem cell population maintenance	4	1.16279	0.0627968	SKI, YAP1, BMPR1A, BCL9L	323	55	19453	4.38007	1	1	0.99865
GO:0042733~embryonic digit morphogenesis	4	1.16279	0.0627968	ZBTB16, GNA12, ECE1, BMPR1A	323	55	19453	4.38007	1	1	0.99865
GO:0048844~artery morphogenesis	3	0.872093	0.0638324	ZMIZ1, TGFBR1, STRA6	323	25	19453	7.22712	1	1	0.99865
GO:0006659~phosphatidylserine biosynthetic process	2	0.581395	0.0645898	PTDSS2, SLC27A1	323	4	19453	30.113	1	1	0.99865
GO:0048368~lateral mesoderm development	2	0.581395	0.0645898	YAP1, BMPR1A	323	4	19453	30.113	1	1	0.99865
GO:0009966~regulation of signal transduction	4	1.16279	0.0684013	AFAP1L2, GRK5, RGS12, KAZALD1	323	57	19453	4.22639	1	1	0.99865
GO:0043393~regulation of protein binding	3	0.872093	0.0684175	UBASH3B, SRC, TGFBR1	323	26	19453	6.94915	1	1	0.99865
GO:0030325~adrenal gland development	3	0.872093	0.0684175	CDKN1C, NR3C1, STRA6	323	26	19453	6.94915	1	1	0.99865
GO:0014850~response to muscle activity	3	0.872093	0.0684175	FNDC5, ADSL, NFATC1	323	26	19453	6.94915	1	1	0.99865
GO:1904753~negative regulation of vascular associated smooth muscle cell migration	3	0.872093	0.0731074	TPM1, GNA12, ADIPOQ	323	27	19453	6.69178	1	1	0.99865
GO:0010875~positive regulation of cholesterol efflux	3	0.872093	0.0731074	RXRA, ADIPOQ, NR1H3	323	27	19453	6.69178	1	1	0.99865
GO:0045879~negative regulation of smoothened signaling pathway	3	0.872093	0.0731074	PTCH2, ULK3, RUNX2	323	27	19453	6.69178	1	1	0.99865
GO:0006629~lipid metabolic process	8	2.32558	0.0753472	ABCA2, AKR1A1, NR1H3, CEL, FAR2, GDPD5, BCAT1, CLU	323	221	19453	2.18013	1	1	0.99865
GO:0051726~regulation of cell cycle	9	2.61628	0.0782641	ZFHX3, GRK5, MADD, CABLES1, PLCB1, PRDM11, TGFBR1, HIPK2, TP73	323	268	19453	2.02252	1	1	0.99865
GO:0035089~establishment of apical/basal cell polarity	2	0.581395	0.0800766	FOXJ1, SCRIB	323	5	19453	24.0904	1	1	0.99865
GO:0090116~C-5 methylation of cytosine	2	0.581395	0.0800766	DNMT3A, DNMT3B	323	5	19453	24.0904	1	1	0.99865
GO:0060043~regulation of cardiac muscle cell proliferation	2	0.581395	0.0800766	TGFBR1, BMPR1A	323	5	19453	24.0904	1	1	0.99865
GO:0045785~positive regulation of cell adhesion	4	1.16279	0.0802599	ZFHX3, TPM1, CHRD, NID1	323	61	19453	3.94925	1	1	0.99865
GO:0001934~positive regulation of protein phosphorylation	8	2.32558	0.0826803	NTRK1, BMP2, PINK1, ADIPOQ, FLOT1, INHBA, PDE8A, HIPK2	323	226	19453	2.13189	1	1	0.99865
GO:0010467~gene expression	6	1.74419	0.0834066	KCNQ1, ADIPOQ, LPAR3, NR3C1, RUNX2, HIPK2	323	140	19453	2.58111	1	1	0.99865
GO:0010629~negative regulation of gene expression	10	2.90698	0.0844922	TGIF1, YAP1, CLDN5, BMP2, PINK1, MYCN, SRC, KCNQ1, ACACB, BMPR1A	323	319	19453	1.88796	1	1	0.99865
GO:0018105~peptidyl-serine phosphorylation	7	2.03488	0.0859249	PINK1, MAST4, MAST3, SRC, ULK3, TGFBR1, HIPK2	323	184	19453	2.29121	1	1	0.99865
GO:0001570~vasculogenesis	4	1.16279	0.086501	YAP1, ZMIZ1, TIE1, EPHA2	323	63	19453	3.82387	1	1	0.99865
GO:0051897~positive regulation of protein kinase B signaling	7	2.03488	0.0877268	NTRK1, PINK1, ERBB3, SRC, GATA3, TGFBR1, IGF1R	323	185	19453	2.27882	1	1	0.99865
GO:0043001~Golgi to plasma membrane protein transport	3	0.872093	0.0877599	GGA1, MACF1, KIF13A	323	30	19453	6.0226	1	1	0.99865
GO:0006325~chromatin organization	10	2.90698	0.0877668	KDM2B, HDAC11, CHD6, HMGA2, JMJD1C, NR3C1, ATXN7L3, EZH1, BANP, MLLT6	323	322	19453	1.87037	1	1	0.99865
GO:0007155~cell adhesion	15	4.36047	0.0891323	PCDH9, VWF, SRC, PCDH12, ATP1B1, PARD3B, CLDN5, GP9, EFS, PDZD2, STAB1, SCARF1, DSCAML1, MYH10, EPHA2	323	566	19453	1.5961	1	1	0.99865
GO:0032456~endocytic recycling	4	1.16279	0.0896965	DENND1B, DENND1A, VTI1A, RAB17	323	64	19453	3.76413	1	1	0.99865
GO:0016477~cell migration	9	2.61628	0.0919639	SYDE2, FMNL1, EFS, NOSTRIN, SCRIB, CORO7, CDC42BPB, RHOC, EPHA2	323	278	19453	1.94976	1	1	0.99865
GO:0060603~mammary gland duct morphogenesis	2	0.581395	0.0953077	SCRIB, NR3C1	323	6	19453	20.0753	1	1	0.99865
GO:0010632~regulation of epithelial cell migration	2	0.581395	0.0953077	MACF1, SRC	323	6	19453	20.0753	1	1	0.99865
GO:0030859~polarized epithelial cell differentiation	2	0.581395	0.0953077	YAP1, SCRIB	323	6	19453	20.0753	1	1	0.99865
GO:1903751~negative regulation of intrinsic apoptotic signaling pathway in response to hydrogen peroxide	2	0.581395	0.0953077	TRAP1, PINK1	323	6	19453	20.0753	1	1	0.99865
GO:1905037~autophagosome organization	2	0.581395	0.0953077	ULK3, ATP13A2	323	6	19453	20.0753	1	1	0.99865
GO:0060325~face morphogenesis	3	0.872093	0.0979696	SKI, CLDN5, STRA6	323	32	19453	5.64619	1	1	0.99865
GO:0006306~DNA methylation	3	0.872093	0.0979696	DNMT3A, BEND3, DNMT3B	323	32	19453	5.64619	1	1	0.99865

## Sheet: Supplementary Table 15
Term	Count	%	PValue	Genes	List Total	Pop Hits	Pop Total	Fold Enrichment	Bonferroni	Benjamini	FDR
GO:0035556~intracellular signal transduction	23	6.70554	7.07e-06	DGKD, CISH, SRC, CDC42BPG, HMGA2, SDCBP2, TGFBR1, CAMKK1, SOCS2, RP1L1, ZAP70, DEPDC1B, LCK, CHN2, RPS6KA2, PPP1R1B, SH3BP5, SIK3, ASB2, TNS3, LAT, CLASP1, TNS1	316	462	19453	3.06468	0.0150907	0.0152056	0.0151562
GO:0007165~signal transduction	43	12.5364	1.65e-05	DGKD, SRC, CABP4, ITPR1, GATA3, NR3C1, SHB, LRP8, IGF1R, ARHGAP22, SYDE2, CRHBP, MTA1, SYNGAP1, GRK5, CHN2, RPS6KA2, SH3BP5, LRRC8D, TNFRSF8, SRGAP2, RALGDS, CSNK1G3, TLE3, TLE2, TXNRD1, TIE1, PDE2A, ADIPOQ, GAB1, PPP2R5A, CSNK1E, TGFBR1, INPP4A, TOM1L2, STK24, TRAF5, PPP1R1B, RAPGEF1, LTB, ASB2, RIN2, LAT	316	1307	19453	2.02531	0.0349587	0.0177921	0.0177342
GO:0045892~negative regulation of transcription, DNA-templated	25	7.28863	3.75e-05	RERE, CSF2, CTBP2, SRC, GATA3, IKZF1, NR3C1, MTA1, PRDM16, HOXA7, PPARGC1B, TLE3, TLE2, FBXW11, ZBTB16, ADIPOQ, HMGA2, NR1D2, CBFA2T3, RUNX2, PML, FOXP1, NCOR2, BMP2, DAP	316	591	19453	2.60407	0.077465	0.0268762	0.0267887
GO:0030036~actin cytoskeleton organization	14	4.08163	0.000111	AUTS2, IQSEC1, ARHGEF17, TMOD3, CDC42BPG, DTNBP1, FOXJ1, FMNL3, CSRP3, PIK3CA, PALLD, AMOTL2, ASB2, SPTBN1	316	232	19453	3.71484	0.212824	0.0497526	0.0495906
GO:0000122~negative regulation of transcription from RNA polymerase II promoter	34	9.91254	0.000116	ZBTB8A, CTBP2, GATA3, GATA2, CXXC5, NR3C1, ETS2, GLIS1, MTA1, ZNF608, CUX1, PRDM16, DNMT3B, HOXA7, FNIP2, JAZF1, ZBTB16, PDE2A, ZBTB10, HMGA2, FOXJ1, NR1D2, FOXP1, NR2F6, SMAD7, NCOR2, EFNA1, SKI, BMP2, HOXB4, HOXB3, CPEB3, EZH1, ENG	316	1016	19453	2.06008	0.220246	0.0497526	0.0495906
GO:0009952~anterior/posterior pattern specification	9	2.62391	0.000179	ZBTB16, HOXB4, HOXB3, HOXB2, HOXA7, MLLT3, TGFBR1, PBX1, HOXB5	316	97	19453	5.71176	0.319963	0.0642623	0.0640531
GO:0001525~angiogenesis	14	4.08163	0.000282	ROBO4, EGFL7, PLXND1, TIE1, GAB1, SHB, HSPG2, FMNL3, ARHGAP22, EFNA1, PIK3CA, HOXB3, AMOTL2, HOXA7	316	255	19453	3.37977	0.454767	0.0866365	0.0863546
GO:0045944~positive regulation of transcription from RNA polymerase II promoter	37	10.7872	0.00044	CSRNP1, HLF, CTBP2, GATA3, GATA2, NR3C1, ETS2, MED12L, GLIS1, ZNF609, CSRP3, ZMIZ1, PRDM16, HOXA7, PPARGC1B, BCL9L, ACVR1, KDM4C, AUTS2, ZBTB16, HMGA2, FOXJ1, GRHL3, NR1D2, FLI1, RUNX2, PBX1, SKI, BMP2, TCEA2, HOXB4, HOXB3, HOXB2, EZH1, SKAP1, HOXB5, ENG	316	1232	19453	1.8488	0.611596	0.118188	0.117803
GO:0050852~T cell receptor signaling pathway	10	2.91545	0.000519	DENND1B, ZAP70, PIK3CA, LCK, RFTN1, GATA3, SHB, ERMAP, LAT, SKAP1	316	142	19453	4.33522	0.672839	0.120751	0.120358
GO:0060048~cardiac muscle contraction	6	1.74927	0.000561	CSRP3, PIK3CA, KCNQ1, TPM1, TCAP, ATP1B1	316	42	19453	8.7943	0.70116	0.120751	0.120358
GO:0060395~SMAD protein signal transduction	7	2.04082	0.000944	SKI, BMP2, RBPMS, ZMIZ1, PML, RUNX2, SMAD7	316	70	19453	6.15601	0.868954	0.184659	0.184058
GO:0007179~transforming growth factor beta receptor signaling pathway	8	2.33236	0.00143608	SKI, ACVR1, SRC, ZMIZ1, TGFBR1, PML, ENG, SMAD7	316	103	19453	4.78137	0.954554	0.257417	0.256579
GO:0060389~pathway-restricted SMAD protein phosphorylation	4	1.16618	0.00165613	ACVR1, BMP2, TGFBR1, SMAD7	316	15	19453	16.416	0.971711	0.274027	0.273135
GO:0010467~gene expression	9	2.62391	0.00203844	KCNQ1, ADIPOQ, DTNBP1, LPAR3, LTB, MLLT3, NR3C1, LAT, RUNX2	316	140	19453	3.95744	0.987589	0.302116	0.301133
GO:0006954~inflammatory response	17	4.95627	0.00210681	GBP5, AFAP1L2, CAMK1D, GATA3, CXCL3, HSPG2, IL17RC, HK1, CRHBP, BMP2, CSRP3, ADORA2A, STAB1, TSPAN2, MS4A2, LAT, EPHA2	316	436	19453	2.40028	0.989289	0.302116	0.301133
GO:1905007~positive regulation of epithelial to mesenchymal transition involved in endocardial cushion formation	3	0.874636	0.00253079	ACVR1, TGFBR1, ENG	316	5	19453	36.9361	0.995706	0.331025	0.329948
GO:0007188~adenylate cyclase-modulating G-protein coupled receptor signaling pathway	6	1.74927	0.00264196	GNAO1, GRK5, ADORA2A, AVPR1B, GNA12, GNAI1	316	59	19453	6.26035	0.996622	0.331025	0.329948
GO:0045582~positive regulation of T cell differentiation	5	1.45773	0.00292398	ZAP70, ZMIZ1, CD27, GATA3, ARID1B	316	37	19453	8.31894	0.998161	0.331025	0.329948
GO:2001237~negative regulation of extrinsic apoptotic signaling pathway	5	1.45773	0.00292398	ACVR1, SRC, HTT, GCLM, TGFBR1	316	37	19453	8.31894	0.998161	0.331025	0.329948
GO:0001570~vasculogenesis	6	1.74927	0.00351997	EGFL7, ZMIZ1, TIE1, CCM2, EPHA2, ENG	316	63	19453	5.86287	0.999492	0.346837	0.345709
GO:0007010~cytoskeleton organization	9	2.62391	0.00367008	FMNL3, SVIL, FMNL1, ABLIM1, EPB42, PALLD, TPM1, ELMO2, CLASP1	316	154	19453	3.59767	0.999633	0.346837	0.345709
GO:0007015~actin filament organization	9	2.62391	0.00381684	TPM4, MPRIP, TMOD3, TPM1, ELMO2, CORO7, PPP1R9A, PPARGC1B, CNN3	316	155	19453	3.57446	0.999732	0.346837	0.345709
GO:0045893~positive regulation of transcription, DNA-templated	23	6.70554	0.00389507	RERE, ACVR1, AFAP1L2, RBPMS, SRC, FBXW11, ZBTB16, HMGA2, NR1D2, GATA3, MLLT3, ARID1B, TGFBR1, FLI1, PML, RUNX2, RAI1, BMP2, MTA1, PRDM16, HIVEP3, TACC1, SKAP1	316	728	19453	1.94489	0.999774	0.346837	0.345709
GO:0043547~positive regulation of GTPase activity	10	2.91545	0.003899	NTRK1, DENND1B, IQSEC1, DOCK9, CHN2, DENND1A, RAPGEF1, GRHL3, SRGAP2, RALGDS	316	190	19453	3.24001	0.999776	0.346837	0.345709
GO:0007596~blood coagulation	7	2.04082	0.00403112	GP9, ADORA2A, VWF, GNA12, DTNBP1, JMJD1C, ANO6	316	93	19453	4.63356	0.999831	0.346837	0.345709
GO:0061028~establishment of endothelial barrier	4	1.16618	0.00450566	PPP1R16B, ROBO4, PDE2A, RAPGEF1	316	21	19453	11.7257	0.99994	0.372756	0.371543
GO:0038083~peptidyl-tyrosine autophosphorylation	4	1.16618	0.00515521	NTRK1, SRC, LCK, IGF1R	316	22	19453	11.1928	0.999985	0.383806	0.382557
GO:0051239~regulation of multicellular organismal process	3	0.874636	0.00520175	ACVR1, ITPR1, TGFBR1	316	7	19453	26.3829	0.999987	0.383806	0.382557
GO:0048704~embryonic skeletal system morphogenesis	5	1.45773	0.00550151	HOXB4, HOXB3, HOXB2, HOXA7, HOXB5	316	44	19453	6.99547	0.999993	0.383806	0.382557
GO:0008286~insulin receptor signaling pathway	6	1.74927	0.00553138	CSRP3, PIK3CA, STXBP4, PTPRA, GAB1, IGF1R	316	70	19453	5.27658	0.999993	0.383806	0.382557
GO:0071560~cellular response to transforming growth factor beta stimulus	6	1.74927	0.00553138	CLEC3B, PDE2A, NR3C1, TGFBR1, IGF1R, SMAD7	316	70	19453	5.27658	0.999993	0.383806	0.382557
GO:0016477~cell migration	12	3.49854	0.00585052	SYDE2, FMNL3, EFNA1, FMNL1, DEPDC1B, PIK3CA, PALLD, ELMO2, CORO7, SORL1, EPHA2, ENG	316	278	19453	2.65727	0.999997	0.387108	0.385848
GO:0006605~protein targeting	5	1.45773	0.00596264	GBP5, STXBP4, SORL1, PML, TRAK2	316	45	19453	6.84001	0.999997	0.387108	0.385848
GO:0006468~protein phosphorylation	16	4.66472	0.00611886	NTRK1, ACVR1, CSF2, SRC, CDC42BPG, CSNK1E, TGFBR1, ZAP70, BMP2, STK24, GRK5, PTPRA, LCK, SIK3, FNIP2, CLASP1	316	444	19453	2.21838	0.999998	0.387108	0.385848
GO:0048762~mesenchymal cell differentiation	3	0.874636	0.00686176	BMP2, HMGA2, TGFBR1	316	8	19453	23.085	1	0.40789	0.406563
GO:0048870~cell motility	5	1.45773	0.00696051	SKI, ELMO2, TGFBR1, EPHA2, ENG	316	47	19453	6.54895	1	0.40789	0.406563
GO:0007169~transmembrane receptor protein tyrosine kinase signaling pathway	8	2.33236	0.00701624	NTRK1, ZAP70, SRC, LCK, TIE1, RAPGEF1, EPHA2, IGF1R	316	137	19453	3.59475	1	0.40789	0.406563
GO:0048844~artery morphogenesis	4	1.16618	0.00742908	ZMIZ1, TGFBR1, ENG, SMAD7	316	25	19453	9.84962	1	0.420525	0.419156
GO:0010862~positive regulation of pathway-restricted SMAD protein phosphorylation	5	1.45773	0.00806289	ACVR1, BMP2, RBPMS, TGFBR1, ENG	316	49	19453	6.28165	1	0.436445	0.435024
GO:0001666~response to hypoxia	9	2.62391	0.00811613	BMP2, ADIPOQ, ITPR1, PLOD2, ATP1B1, HSPG2, CBFA2T3, PML, ENG	316	176	19453	3.14796	1	0.436445	0.435024
GO:0008283~cell proliferation	9	2.62391	0.00862224	GNG2, CSF2, SRC, TXNRD1, ZBTB16, HOXB4, TACC1, SDCBP2, SORL1	316	178	19453	3.11259	1	0.452352	0.45088
GO:0001701~in utero embryonic development	10	2.91545	0.00908523	ACVR1, MBNL1, BMP2, ZMIZ1, TIE1, GNA12, CCM2, GATA3, TGFBR1, CMIP	316	217	19453	2.83687	1	0.465294	0.463779
GO:0007229~integrin-mediated signaling pathway	7	2.04082	0.00941847	SRC, PTPRA, RCC2, ITGA11, ADAM12, CCM2, LAT	316	111	19453	3.88217	1	0.471143	0.469609
GO:0031648~protein destabilization	5	1.45773	0.00992151	BMP2, SRC, FBXW11, CCDC88C, HTT	316	52	19453	5.91924	1	0.485026	0.483448
GO:0060391~positive regulation of SMAD protein import into nucleus	4	1.16618	0.0102111	ACVR1, BMP2, RBPMS, TGFBR1	316	28	19453	8.7943	1	0.48809	0.486501
GO:0030512~negative regulation of transforming growth factor beta receptor signaling pathway	7	2.04082	0.0106599	SKI, BMP2, PRDM16, VASN, ENG, BCL9L, SMAD7	316	114	19453	3.78001	1	0.498465	0.496843
GO:0045444~fat cell differentiation	6	1.74927	0.0117608	C1QTNF3, GRK5, HMGA2, GATA2, METTL8, GLIS1	316	84	19453	4.39715	1	0.538245	0.536493
GO:0009410~response to xenobiotic stimulus	11	3.207	0.0152392	NTRK1, ABCC1, ADORA2A, SRC, LCK, GNA12, GATA3, GCLM, HSPG2, LRP8, ENG	316	277	19453	2.44463	1	0.653646	0.651519
GO:0071320~cellular response to cAMP	5	1.45773	0.01528	CRHBP, KCNQ1, PDE2A, ADIPOQ, RAPGEF1	316	59	19453	5.21696	1	0.653646	0.651519
GO:0060444~branching involved in mammary gland duct morphogenesis	3	0.874636	0.0154979	SRC, PML, EPHA2	316	12	19453	15.39	1	0.653646	0.651519
GO:0032926~negative regulation of activin receptor signaling pathway	3	0.874636	0.0154979	SKI, ACVR1, SMAD7	316	12	19453	15.39	1	0.653646	0.651519
GO:0071773~cellular response to BMP stimulus	4	1.16618	0.0160284	ACVR1, BMP2, GATA3, RUNX2	316	33	19453	7.46183	1	0.655609	0.653476
GO:0031532~actin cytoskeleton reorganization	5	1.45773	0.0161682	AUTS2, CDC42BPG, GAB1, DTNBP1, ASB2	316	60	19453	5.13001	1	0.655609	0.653476
GO:0045599~negative regulation of fat cell differentiation	5	1.45773	0.0170882	BMP2, TRIO, ADIPOQ, GATA3, GATA2	316	61	19453	5.04591	1	0.655609	0.653476
GO:0043524~negative regulation of neuron apoptotic process	8	2.33236	0.0170927	NTRK1, SYNGAP1, ADORA2A, PLXND1, PIK3CA, CLCF1, CPEB3, GCLM	316	163	19453	3.02136	1	0.655609	0.653476
GO:0008015~blood circulation	4	1.16618	0.0173732	CYB5R3, ADORA2A, HOXB2, FLI1	316	34	19453	7.24237	1	0.655609	0.653476
GO:0031032~actomyosin structure organization	4	1.16618	0.0173732	EPB41L2, CDC42BPG, MYH10, CNN3	316	34	19453	7.24237	1	0.655609	0.653476
GO:0001649~osteoblast differentiation	7	2.04082	0.0180081	BMP2, TPM4, KCNQ1OT1, ITGA11, GLIS1, RUNX2, EPHA2	316	128	19453	3.36657	1	0.660678	0.658528
GO:0048680~positive regulation of axon regeneration	3	0.874636	0.0181218	STK24, SCARF1, IGF1R	316	13	19453	14.2062	1	0.660678	0.658528
GO:0050731~positive regulation of peptidyl-tyrosine phosphorylation	6	1.74927	0.0199393	EFNA1, ACVR1, EHD4, SRC, ADIPOQ, LRP8	316	96	19453	3.84751	1	0.711032	0.708718
GO:0016310~phosphorylation	11	3.207	0.0207271	TRIO, CAMK1D, PIK3CA, TIE1, RPS6KA2, PIP5K1B, SGMS2, MAP3K14, STK40, CAMKK1, EPHA2	316	291	19453	2.32702	1	0.711032	0.708718
GO:0051014~actin filament severing	3	0.874636	0.0209186	SVIL, FMNL1, SRGAP2	316	14	19453	13.1915	1	0.711032	0.708718
GO:0010717~regulation of epithelial to mesenchymal transition	3	0.874636	0.0209186	CLASP1, TGFBR1, SMAD7	316	14	19453	13.1915	1	0.711032	0.708718
GO:0007399~nervous system development	14	4.08163	0.0216251	NTRK1, MBNL1, CAMK1D, DCTN1, CABLES1, NAV1, NAV2, PPP1R9A, SDCBP2, ARID1B, TGFBR1, RAPGEF1, HOXB2, SRGAP2	316	425	19453	2.02786	1	0.711032	0.708718
GO:0045765~regulation of angiogenesis	4	1.16618	0.0217745	EFNA1, PLXND1, CCM2, EPHA2	316	37	19453	6.65515	1	0.711032	0.708718
GO:0043065~positive regulation of apoptotic process	12	3.49854	0.0218332	TNFAIP8, BMP2, CAMK1D, SRC, RPS6KA2, ZBTB16, HTT, HMGA2, TNFRSF8, BMF, ANO6, TGFBR1	316	336	19453	2.19858	1	0.711032	0.708718
GO:0043410~positive regulation of MAPK cascade	8	2.33236	0.0222121	NTRK1, EFNA1, BMP2, AVPR1B, PELI2, LPAR3, TGFBR1, IGF1R	316	172	19453	2.86326	1	0.711032	0.708718
GO:0007155~cell adhesion	17	4.95627	0.0226103	EGFL7, VWF, SRC, ICAM2, PCDH12, ATP1B1, PARD3B, GP9, PDZD2, CLDN15, ADAM12, ITGA11, STAB1, SCARF1, MYH10, ENG, EPHA2	316	566	19453	1.84898	1	0.711032	0.708718
GO:0051301~cell division	13	3.79009	0.0228086	DCTN1, RCC2, CABLES1, HMGA2, NR3C1, GNAI1, PARD3B, RECQL5, EPB41L2, KIF13A, TACC1, CLASP1, MAD1L1	316	383	19453	2.08951	1	0.711032	0.708718
GO:0048469~cell maturation	4	1.16618	0.0233643	FOXJ1, GATA3, GATA2, RUNX2	316	38	19453	6.48001	1	0.717953	0.715616
GO:0030168~platelet activation	5	1.45773	0.0256253	DGKD, PIK3CA, VWF, SRC, LCK	316	69	19453	4.46088	1	0.774534	0.772014
GO:0045214~sarcomere organization	4	1.16618	0.0267279	CSRP3, TPM1, TNNT3, TCAP	316	40	19453	6.15601	1	0.774534	0.772014
GO:0010719~negative regulation of epithelial to mesenchymal transition	4	1.16618	0.0267279	EFNA1, GATA3, VASN, SMAD7	316	40	19453	6.15601	1	0.774534	0.772014
GO:0001655~urogenital system development	3	0.874636	0.0270061	ACVR1, GATA2, PBX1	316	16	19453	11.5425	1	0.774534	0.772014
GO:0030278~regulation of ossification	3	0.874636	0.0270061	ACVR1, RUNX2, PBX1	316	16	19453	11.5425	1	0.774534	0.772014
GO:0071466~cellular response to xenobiotic stimulus	5	1.45773	0.028095	CRHBP, RECQL5, KCNQ1, PDE2A, ADIPOQ	316	71	19453	4.33522	1	0.789042	0.786474
GO:0009887~animal organ morphogenesis	7	2.04082	0.0282456	TLE3, TLE2, BMP2, ABLIM1, HSPG2, FLI1, PBX1	316	142	19453	3.03465	1	0.789042	0.786474
GO:0007275~multicellular organism development	7	2.04082	0.0299664	NTRK1, HLF, CUX1, TIE1, HOXB2, EPHA2, IGF1R	316	144	19453	2.99251	1	0.805592	0.80297
GO:0060216~definitive hemopoiesis	3	0.874636	0.0302847	HOXB4, HOXB3, GATA2	316	17	19453	10.8636	1	0.805592	0.80297
GO:0047496~vesicle transport along microtubule	3	0.874636	0.0302847	FBXW11, HTT, TRAK2	316	17	19453	10.8636	1	0.805592	0.80297
GO:0030217~T cell differentiation	4	1.16618	0.0303361	ZAP70, LCK, GATA3, RUNX2	316	42	19453	5.86287	1	0.805592	0.80297
GO:0044849~estrous cycle	3	0.874636	0.0337121	NCOR2, OPRL1, IGF1R	316	18	19453	10.26	1	0.884327	0.881449
GO:0030501~positive regulation of bone mineralization	4	1.16618	0.0341873	ACVR1, BMP2, ALOX5, ANO6	316	44	19453	5.59638	1	0.885986	0.883103
GO:0008360~regulation of cell shape	7	2.04082	0.0365253	FMNL3, FMNL1, EPB42, PLXND1, TPM1, GNA12, MYH10	316	151	19453	2.85378	1	0.925153	0.922143
GO:0071260~cellular response to mechanical stimulus	5	1.45773	0.0378237	PDE2A, TNFRSF8, MAP3K14, ENG, IGF1R	316	78	19453	3.94616	1	0.925153	0.922143
GO:0006898~receptor-mediated endocytosis	5	1.45773	0.0378237	STAB1, LDLRAP1, SCARF1, HSPG2, SORL1	316	78	19453	3.94616	1	0.925153	0.922143
GO:0001938~positive regulation of endothelial cell proliferation	5	1.45773	0.0378237	PPP1R16B, BMP2, EGFL7, HSPG2, TGFBR1	316	78	19453	3.94616	1	0.925153	0.922143
GO:0006661~phosphatidylinositol biosynthetic process	4	1.16618	0.0382792	INPP4A, INPP5F, PIP5K1B, SYNJ2	316	46	19453	5.35305	1	0.925153	0.922143
GO:0043407~negative regulation of MAP kinase activity	4	1.16618	0.0382792	BMP2, ADIPOQ, SORL1, DUSP7	316	46	19453	5.35305	1	0.925153	0.922143
GO:0016055~Wnt signaling pathway	8	2.33236	0.0397379	CSNK1G3, TLE3, TLE2, GRK5, FBXW11, CCDC88C, AMOTL2, CSNK1E	316	195	19453	2.52554	1	0.949735	0.946645
GO:0060037~pharyngeal system development	3	0.874636	0.040991	ACVR1, GATA3, TGFBR1	316	20	19453	9.23402	1	0.958387	0.955268
GO:0034067~protein localization to Golgi apparatus	3	0.874636	0.040991	GBP5, PACS1, SORL1	316	20	19453	9.23402	1	0.958387	0.955268
GO:0048538~thymus development	4	1.16618	0.042609	GATA3, TGFBR1, MAD1L1, PBX1	316	48	19453	5.13001	1	0.975022	0.971849
GO:0035914~skeletal muscle cell differentiation	4	1.16618	0.042609	HLF, HIVEP3, ASB2, BCL9L	316	48	19453	5.13001	1	0.975022	0.971849
GO:0006897~endocytosis	8	2.33236	0.0437429	CSNK1G3, DENND1B, EHD4, DGKD, DENND1A, CSNK1E, RIN2, LRP8	316	199	19453	2.47478	1	0.990432	0.987209
GO:0003203~endocardial cushion morphogenesis	3	0.874636	0.0448315	ACVR1, BMP2, ENG	316	21	19453	8.7943	1	1	0.997209
GO:0048013~ephrin receptor signaling pathway	4	1.16618	0.0471732	NTRK1, EFNA1, SRC, EPHA2	316	50	19453	4.92481	1	1	0.997209
GO:0051056~regulation of small GTPase mediated signal transduction	6	1.74927	0.0484633	SYDE2, ARHGAP22, TRIO, ARHGEF17, CHN2, SRGAP2	316	122	19453	3.02755	1	1	0.997209
GO:0036092~phosphatidylinositol-3-phosphate biosynthetic process	3	0.874636	0.0487992	INPP4A, PIK3CA, SYNJ2	316	22	19453	8.39456	1	1	0.997209
GO:0001709~cell fate determination	3	0.874636	0.0487992	PTCH2, GATA3, GATA2	316	22	19453	8.39456	1	1	0.997209
GO:0007173~epidermal growth factor receptor signaling pathway	4	1.16618	0.0495419	DGKD, PIK3CA, SRC, GAB1	316	51	19453	4.82825	1	1	0.997209
GO:0072659~protein localization to plasma membrane	7	2.04082	0.052235	EHD4, PACS1, ADIPOQ, ATP1B1, SPTBN1, SKAP1, EPHA2	316	165	19453	2.61164	1	1	0.997209
GO:0007224~smoothened signaling pathway	5	1.45773	0.0528342	TMEM17, KIAA0586, PTCH2, HSPG2, RUNX2	316	87	19453	3.53794	1	1	0.997209
GO:1903076~regulation of protein localization to plasma membrane	3	0.874636	0.0528888	CSRP3, LDLRAP1, SPTBN1	316	23	19453	8.02958	1	1	0.997209
GO:0045766~positive regulation of angiogenesis	7	2.04082	0.0535023	NTRK1, TIE1, ADAM12, GAB1, HMGA2, GATA2, ENG	316	166	19453	2.59591	1	1	0.997209
GO:0001837~epithelial to mesenchymal transition	4	1.16618	0.0544498	BMP2, HMGA2, TGFBR1, ENG	316	53	19453	4.64605	1	1	0.997209
GO:1902895~positive regulation of pri-miRNA transcription from RNA polymerase II promoter	4	1.16618	0.0544498	BMP2, GATA3, GATA2, NR3C1	316	53	19453	4.64605	1	1	0.997209
GO:0006936~muscle contraction	5	1.45773	0.0565508	GNAO1, TPM4, TMOD3, TPM1, TNNT3	316	89	19453	3.45843	1	1	0.997209
GO:0016525~negative regulation of angiogenesis	6	1.74927	0.0573138	ALOX5, TIE1, STAB1, HSPG2, PML, EPHA2	316	128	19453	2.88563	1	1	0.997209
GO:0046854~phosphatidylinositol phosphorylation	4	1.16618	0.0595811	SOCS2, CISH, PIK3CA, PIP5K1B	316	55	19453	4.4771	1	1	0.997209
GO:0046847~filopodium assembly	3	0.874636	0.0614142	FMNL3, SRGAP2, TGFBR1	316	25	19453	7.38722	1	1	0.997209
GO:0030099~myeloid cell differentiation	3	0.874636	0.0614142	CSF2, ZBTB16, PML	316	25	19453	7.38722	1	1	0.997209
GO:0043949~regulation of cAMP-mediated signaling	2	0.58309	0.0632199	PDE2A, GNAI1	316	4	19453	30.7801	1	1	0.997209
GO:0014028~notochord formation	2	0.58309	0.0632199	EFNA1, EPHA2	316	4	19453	30.7801	1	1	0.997209
GO:1905222~atrioventricular canal morphogenesis	2	0.58309	0.0632199	BMP2, ENG	316	4	19453	30.7801	1	1	0.997209
GO:0002520~immune system development	2	0.58309	0.0632199	GATA3, CACNA1C	316	4	19453	30.7801	1	1	0.997209
GO:1903039~positive regulation of leukocyte cell-cell adhesion	2	0.58309	0.0632199	LCK, SKAP1	316	4	19453	30.7801	1	1	0.997209
GO:0051896~regulation of protein kinase B signaling	3	0.874636	0.0658405	NTRK1, PPP1R16B, INPP5F	316	26	19453	7.10309	1	1	0.997209
GO:0043393~regulation of protein binding	3	0.874636	0.0658405	SRC, LDLRAP1, TGFBR1	316	26	19453	7.10309	1	1	0.997209
GO:0018108~peptidyl-tyrosine phosphorylation	4	1.16618	0.0676857	NTRK1, ZAP70, SRC, LCK	316	58	19453	4.24553	1	1	0.997209
GO:0045165~cell fate commitment	4	1.16618	0.0676857	BMP2, GATA3, GATA2, PML	316	58	19453	4.24553	1	1	0.997209
GO:0030509~BMP signaling pathway	5	1.45773	0.0685181	ACVR1, BMP2, RUNX2, ENG, SMAD7	316	95	19453	3.24001	1	1	0.997209
GO:0007507~heart development	8	2.33236	0.0688053	ACVR1, BMP2, RPS6KA2, KCNQ1, FOXJ1, CCM2, CACNA1C, TGFBR1	316	221	19453	2.22842	1	1	0.997209
GO:0007205~protein kinase C-activating G-protein coupled receptor signaling pathway	3	0.874636	0.0703697	DGKD, CISH, ADORA2A	316	27	19453	6.84001	1	1	0.997209
GO:1904753~negative regulation of vascular associated smooth muscle cell migration	3	0.874636	0.0703697	TPM1, GNA12, ADIPOQ	316	27	19453	6.84001	1	1	0.997209
GO:0006357~regulation of transcription from RNA polymerase II promoter	37	10.7872	0.0742986	CSRNP1, ZBTB8A, HLF, CTBP2, JMJD1C, IKZF1, NR3C1, ETS2, MED12L, GLIS1, RAI1, ZNF609, ZNF608, CUX1, ZMIZ1, PRDM16, HIVEP3, HOXA7, KDM4C, ZBTB16, ZBTB10, CTDSPL, FOXJ1, GRHL3, ARID1B, FLI1, RUNX2, PBX1, FOXP1, NR2F6, SMAD7, NCOR2, HOXB4, HOXB3, HOXB2, LOC728743, HOXB5	316	1736	19453	1.31205	1	1	0.997209
GO:0050900~leukocyte migration	3	0.874636	0.0749973	SRC, LCK, FOXJ1	316	28	19453	6.59573	1	1	0.997209
GO:0001934~positive regulation of protein phosphorylation	8	2.33236	0.0753537	NTRK1, EFNA1, BMP2, FXR2, PELI2, ADIPOQ, DTNBP1, ENG	316	226	19453	2.17912	1	1	0.997209
GO:0071363~cellular response to growth factor stimulus	4	1.16618	0.0762625	ACVR1, EHD4, LRP8, TGFBR1	316	61	19453	4.03673	1	1	0.997209
GO:1904778~positive regulation of protein localization to cell cortex	2	0.58309	0.0783922	EPB41L2, GNAI1	316	5	19453	24.6241	1	1	0.997209
GO:0098914~membrane repolarization during atrial cardiac muscle cell action potential	2	0.58309	0.0783922	KCNJ5, KCNQ1	316	5	19453	24.6241	1	1	0.997209
GO:0018105~peptidyl-serine phosphorylation	7	2.04082	0.0794076	CSNK1G3, CAMK1D, SRC, RPS6KA2, CSNK1E, CLASP1, TGFBR1	316	184	19453	2.34196	1	1	0.997209
GO:0051897~positive regulation of protein kinase B signaling	7	2.04082	0.0808914	NTRK1, PIK3CA, SRC, GATA3, TGFBR1, ENG, IGF1R	316	185	19453	2.3293	1	1	0.997209
GO:0010628~positive regulation of gene expression	14	4.08163	0.0809561	CSF2, PDE2A, DTNBP1, HMGA2, GRHL3, GATA2, TGFBR1, RUNX2, BMP2, KCNQ1OT1, RPS6KA2, DNMT3B, ENG, CNGB1	316	519	19453	1.66058	1	1	0.997209
GO:0030336~negative regulation of cell migration	7	2.04082	0.0825122	STK24, TIE1, TPM1, ADIPOQ, SRGAP2, ENG, SMAD7	316	186	19453	2.31678	1	1	0.997209
GO:0043153~entrainment of circadian clock by photoperiod	3	0.874636	0.0845304	MTA1, PML, NR2F6	316	30	19453	6.15601	1	1	0.997209
GO:0043001~Golgi to plasma membrane protein transport	3	0.874636	0.0845304	GGA1, KIF13A, SPTBN1	316	30	19453	6.15601	1	1	0.997209
GO:0007498~mesoderm development	3	0.874636	0.0845304	TIE1, IKZF1, ETS2	316	30	19453	6.15601	1	1	0.997209
GO:0032456~endocytic recycling	4	1.16618	0.0852915	DENND1B, EHD4, DENND1A, VTI1A	316	64	19453	3.84751	1	1	0.997209
GO:0006959~humoral immune response	4	1.16618	0.0852915	ST6GAL1, ALOX5, FOXJ1, GATA3	316	64	19453	3.84751	1	1	0.997209
GO:0048812~neuron projection morphogenesis	4	1.16618	0.0883979	TRIO, ADORA2A, DTNBP1, SRGAP2	316	65	19453	3.78832	1	1	0.997209
GO:0006006~glucose metabolic process	4	1.16618	0.0883979	PIK3CA, KCNQ1, ADIPOQ, HK1	316	65	19453	3.78832	1	1	0.997209
GO:0060271~cilium assembly	8	2.33236	0.0885058	DNAI2, ABLIM1, TMEM17, EHD4, TRAF3IP1, KIAA0586, DTNBP1, FOXJ1	316	235	19453	2.09566	1	1	0.997209
GO:0030866~cortical actin cytoskeleton organization	3	0.874636	0.0894276	FMNL3, FMNL1, EPB41L2	316	31	19453	5.95743	1	1	0.997209
GO:0090102~cochlea development	3	0.874636	0.0894276	KCNQ1, GATA3, GATA2	316	31	19453	5.95743	1	1	0.997209
GO:0007417~central nervous system development	6	1.74927	0.0930225	TRIO, ADORA2A, ZBTB16, GRHL3, MSI2, SPTBN1	316	148	19453	2.49568	1	1	0.997209
GO:0090402~oncogene-induced cell senescence	2	0.58309	0.0933195	HMGA2, PML	316	6	19453	20.52	1	1	0.997209
GO:0097272~ammonia homeostasis	2	0.58309	0.0933195	RHCE, RHD	316	6	19453	20.52	1	1	0.997209
GO:0048845~venous blood vessel morphogenesis	2	0.58309	0.0933195	CCM2, ENG	316	6	19453	20.52	1	1	0.997209
GO:0043535~regulation of blood vessel endothelial cell migration	2	0.58309	0.0933195	EFNA1, EPHA2	316	6	19453	20.52	1	1	0.997209
GO:0060129~thyroid-stimulating hormone-secreting cell differentiation	2	0.58309	0.0933195	BMP2, GATA2	316	6	19453	20.52	1	1	0.997209
GO:0007182~common-partner SMAD protein phosphorylation	2	0.58309	0.0933195	SPTBN1, PML	316	6	19453	20.52	1	1	0.997209
GO:0046856~phosphatidylinositol dephosphorylation	3	0.874636	0.0944064	INPP5A, INPP5F, SYNJ2	316	32	19453	5.77126	1	1	0.997209
GO:0001569~branching involved in blood vessel morphogenesis	3	0.874636	0.0944064	ACVR1, PLXND1, ENG	316	32	19453	5.77126	1	1	0.997209
GO:0050728~negative regulation of inflammatory response	6	1.74927	0.0950523	C1QTNF3, ADORA2A, ALOX5, ADIPOQ, NR1D2, GATA3	316	149	19453	2.47893	1	1	0.997209
GO:0007411~axon guidance	7	2.04082	0.0974353	NTRK1, EFNA1, ROBO4, TRIO, PALLD, GATA3, EPHA2	316	195	19453	2.20985	1	1	0.997209
GO:0098609~cell-cell adhesion	7	2.04082	0.0974353	SRC, TMOD3, ITGA11, ICAM2, ELMO2, ESAM, CNN3	316	195	19453	2.20985	1	1	0.997209

## Sheet: Supplementary Table 16
Term	Count	%	PValue	Genes	List Total	Pop Hits	Pop Total	Fold Enrichment	Bonferroni	Benjamini	FDR
GO:0035556~intracellular signal transduction	25	7.02247	1.08e-06	BLK, SRC, LRRK1, STK39, PRKAG2, NLRC3, PRKCZ, ADCY7, RAB40C, MCF2L, INPP5D, RGS9, TNS3, PAG1, LYN, NSMCE1, HMGA2, PRKCA, NFATC1, CDC42BPB, ZAP70, SH3BP5L, RASA3, MAPKAPK2, CLNK	327	462	19453	3.21912	0.00252186	0.00252504	0.00252396
GO:0032729~positive regulation of interferon-gamma production	9	2.52809	5.3e-05	SLC7A5, PDE4D, SLC11A1, HMHB1, TLR9, SLAMF6, SCRIB, IL27, TRIM27	327	79	19453	6.77726	0.116525	0.0528961	0.0528735
GO:0010447~response to acidic pH	5	1.40449	6.79e-05	SRC, SERPINF1, GPR65, GPR4, SLC9A1	327	14	19453	21.2462	0.146742	0.0528961	0.0528735
GO:0006468~protein phosphorylation	19	5.33708	0.000538	BLK, LYN, SRC, LRRK1, STK39, AATK, PRKAG2, PRKCA, CDC42BPB, PIK3R1, ACVR1B, PRKCZ, ZAP70, PRKAR1B, GRK5, GRK4, MAPKAPK2, FAM20C, CSNK1G2	327	444	19453	2.54571	0.716096	0.250909	0.250802
GO:0001933~negative regulation of protein phosphorylation	8	2.24719	0.000562	LYN, SPRED2, ZC3H12A, MYADM, TERF2IP, SIRPA, PRR5L, ARRB2	327	85	19453	5.59899	0.731044	0.250909	0.250802
GO:0010507~negative regulation of autophagy	7	1.96629	0.000644	RPTOR, SLC7A5, BCL2, FOXK2, TBC1D14, FOXK1, TRIM27	327	63	19453	6.60992	0.778191	0.250909	0.250802
GO:0006954~inflammatory response	18	5.05618	0.00116755	CCR1, HDAC4, SLC11A1, STK39, IL27, LIPA, PRKCZ, NCR3, ADORA2A, LTB4R2, CCRL2, MAPKAPK2, ZC3H12A, TLR9, CCR7, TSPAN2, S100A9, MGLL	327	436	19453	2.45598	0.934868	0.359671	0.359517
GO:0006935~chemotaxis	9	2.52809	0.0012307	PDGFRB, CMTM7, CCR1, LTB4R2, CCRL2, PLAUR, RAC2, CCR7, RNASE2	327	125	19453	4.28323	0.943817	0.359671	0.359517
GO:0006915~apoptotic process	22	6.17978	0.00186756	CYFIP2, DAXX, TNFAIP8, RALB, PLEKHF1, GPR65, PRF1, CIDEB, TRAF1, PML, SH3RF3, ADORA2A, PACS2, TRIM39, GRK5, INPP5D, GJB6, PEA15, ZC3H12A, BCL2, S100A9, MCM2	327	619	19453	2.11432	0.987354	0.445458	0.445267
GO:0072659~protein localization to plasma membrane	10	2.80899	0.00190529	EHD1, NFASC, PLEKHF1, RAB40C, PACS2, CD81, SEC16A, MYADM, PRKCZ, SPTBN1	327	165	19453	3.60541	0.988424	0.445458	0.445267
GO:0010468~regulation of gene expression	13	3.65169	0.00209718	DAXX, KDM4B, DNMT3A, HMHB1, PROX1, PTPRC, TRIM39, ZC3H12A, BCL2, SIRPA, TRIM27, JARID2, UMODL1	327	270	19453	2.8643	0.992615	0.445746	0.445555
GO:0007165~signal transduction	37	10.3933	0.00231191	VAC14, RALB, SRC, LRRK1, FAM13A, STK39, IL27, ARRB2, PIK3R1, ACVR1B, NDRG2, PRKCZ, NDRG1, GRK5, GRK4, INPP5D, KIF13B, TP53BP2, RAC2, TNFRSF8, NPHP4, PAG1, LYN, PDGFRB, CMTM7, FNBP1, PDE4D, PLAUR, CDC42BPB, ARHGAP26, MKLN1, RASA3, RADIL, RGS12, RIN2, PDE9A, CSNK1G2	327	1307	19453	1.68409	0.995535	0.448109	0.447918
GO:0009966~regulation of signal transduction	6	1.68539	0.00263111	SPRED2, NCLN, GRK5, GRK4, RGS12, MGLL	327	57	19453	6.26203	0.997887	0.448109	0.447918
GO:0018108~peptidyl-tyrosine phosphorylation	6	1.68539	0.00284052	BLK, LYN, PDGFRB, ZAP70, SRC, FLT4	327	58	19453	6.15407	0.998707	0.448109	0.447918
GO:0070373~negative regulation of ERK1 and ERK2 cascade	7	1.96629	0.00287495	LYN, SPRED2, PTPRC, MIR185, TLR9, SIRPA, NDRG2	327	84	19453	4.95744	0.998807	0.448109	0.447918
GO:0046777~protein autophosphorylation	10	2.80899	0.00367946	LYN, PDGFRB, ZAP70, GRK5, SRC, FLT4, MAPKAPK2, STK39, FAM20C, ACVR1B	327	182	19453	3.26864	0.999819	0.453329	0.453135
GO:0032469~endoplasmic reticulum calcium ion homeostasis	4	1.1236	0.00370272	PACS2, WFS1, BCL2, PML	327	19	19453	12.5241	0.999829	0.453329	0.453135
GO:0030889~negative regulation of B cell proliferation	4	1.1236	0.00370272	BLK, LYN, INPP5D, MIR185	327	19	19453	12.5241	0.999829	0.453329	0.453135
GO:0042149~cellular response to glucose starvation	6	1.68539	0.00379976	SLC7A5, ZC3H12A, SLC2A1, BCL2, PRKAG2, CPEB4	327	62	19453	5.75703	0.999864	0.453329	0.453135
GO:0090501~RNA phosphodiester bond hydrolysis	3	0.842697	0.00401682	ZC3H12A, RNASE2, RNASE1	327	6	19453	29.7446	0.999918	0.453329	0.453135
GO:0042110~T cell activation	6	1.68539	0.00407181	ZAP70, PTPRC, KIF13B, CD48, SLAMF6, NLRC3	327	63	19453	5.66565	0.999928	0.453329	0.453135
GO:2000573~positive regulation of DNA biosynthetic process	4	1.1236	0.00430259	PDGFRB, SRC, NFATC1, ARRB2	327	20	19453	11.8979	0.999958	0.457248	0.457053
GO:0007264~small GTPase mediated signal transduction	8	2.24719	0.0047195	DOCK10, RUFY1, DOCK5, DOCK9, CCDC88C, RAC2, LIPA, RIN2	327	123	19453	3.86922	0.999984	0.471266	0.471065
GO:0030217~T cell differentiation	5	1.40449	0.00524979	ZAP70, PTPRC, PIK3R1, LIPA, RUNX2	327	42	19453	7.08206	0.999995	0.471266	0.471065
GO:0045892~negative regulation of transcription, DNA-templated	20	5.61798	0.00534377	HDAC4, PCGF6, DAXX, SAMD7, SRC, DNMT3A, FOXK2, HMGA2, FOXK1, PROX1, LIMD1, CBFA2T3, PML, RUNX2, NCOR2, SBNO2, PRDM16, JARID2, RCOR1, WNT4	327	591	19453	2.01317	0.999996	0.471266	0.471065
GO:0090330~regulation of platelet aggregation	3	0.842697	0.00556144	BLK, LYN, PRKCA	327	7	19453	25.4954	0.999998	0.471266	0.471065
GO:0010595~positive regulation of endothelial cell migration	6	1.68539	0.00564391	FLT4, ZC3H12A, PRKCA, PROX1, ETS1, RIN2	327	68	19453	5.24906	0.999998	0.471266	0.471065
GO:0006469~negative regulation of protein kinase activity	6	1.68539	0.00564391	PTPRC, ADORA2A, PRKAG2, MLLT1, TRIM27, TRIB1	327	68	19453	5.24906	0.999998	0.471266	0.471065
GO:0071222~cellular response to lipopolysaccharide	10	2.80899	0.0063467	SLC7A5, SBNO2, TRIM41, SRC, CEBPE, ZC3H12A, TLR9, SIRPA, PRPF8, CAMP	327	198	19453	3.00451	1	0.501974	0.501759
GO:0014911~positive regulation of smooth muscle cell migration	4	1.1236	0.00644106	PDGFRB, HDAC4, SRC, BCL2	327	23	19453	10.346	1	0.501974	0.501759
GO:0032715~negative regulation of interleukin-6 production	6	1.68539	0.00676957	INPP5D, ZC3H12A, TLR9, SIRPA, NLRC3, ARRB2	327	71	19453	5.02726	1	0.510557	0.510338
GO:0090263~positive regulation of canonical Wnt signaling pathway	8	2.24719	0.00718186	MIR145, TBL1XR1, SRC, UBR5, LRRK1, FAM53B, CSNK1G2, PSMB9	327	133	19453	3.5783	1	0.514696	0.514476
GO:0030890~positive regulation of B cell proliferation	5	1.40449	0.00726474	PTPRC, CD81, BCL2, TLR9, SLC39A10	327	46	19453	6.46623	1	0.514696	0.514476
GO:0010629~negative regulation of gene expression	13	3.65169	0.00776077	CCR1, DAXX, SAMD7, SRC, SERPINF1, ACVR1B, SLC7A5, ZC3H12A, MIR185, MYADM, ZBTB7B, RCOR1, WNT4	327	319	19453	2.42433	1	0.533667	0.533438
GO:0008277~regulation of G-protein coupled receptor protein signaling pathway	5	1.40449	0.0097327	GRK5, GRK4, GNG7, RGS12, RGS9	327	50	19453	5.94893	1	0.650144	0.649866
GO:0001945~lymph vessel development	3	0.842697	0.0115279	TMEM204, FLT4, HEG1	327	10	19453	17.8468	1	0.716426	0.71612
GO:0008285~negative regulation of cell proliferation	16	4.49438	0.0116151	LYN, HDAC4, KLF13, PROX1, ETS1, NDRG1, CBFA2T3, FGFRL1, PML, SKI, ADORA2A, ASPH, GJB6, MMRN2, TNFRSF8, SH3BP4	327	462	19453	2.06024	1	0.716426	0.71612
GO:0032720~negative regulation of tumor necrosis factor production	6	1.68539	0.0116442	ZC3H12A, MIR185, SIRPA, NLRC3, TRIM27, ARRB2	327	81	19453	4.40661	1	0.716426	0.71612
GO:0006974~cellular response to DNA damage stimulus	12	3.37079	0.0122101	BLK, RPTOR, LYN, RAD52, KIN, ZC3H12A, UBR5, SETD1A, MAPKAPK2, BCL2, NSMCE1, BAZ1B	327	298	19453	2.39554	1	0.730826	0.730513
GO:0007417~central nervous system development	8	2.24719	0.0125034	SEMA6B, ADORA2A, MTF1, APLP2, SLC2A1, MBP, JARID2, SPTBN1	327	148	19453	3.21564	1	0.730826	0.730513
GO:0001932~regulation of protein phosphorylation	5	1.40449	0.0143599	LYN, PRKAR1B, CCDC88C, TLR9, PML	327	56	19453	5.31154	1	0.818866	0.818516
GO:0043552~positive regulation of phosphatidylinositol 3-kinase activity	4	1.1236	0.0161515	LYN, PDGFRB, SRC, CCR7	327	32	19453	7.43616	1	0.854868	0.854502
GO:0043304~regulation of mast cell degranulation	3	0.842697	0.0165386	BLK, LYN, RAC2	327	12	19453	14.8723	1	0.854868	0.854502
GO:0045060~negative thymic T cell selection	3	0.842697	0.0165386	ZAP70, PTPRC, CCR7	327	12	19453	14.8723	1	0.854868	0.854502
GO:0007018~microtubule-based movement	6	1.68539	0.0169461	DNAH17, KIF13B, KIF21B, KIF7, DNAI1, BICD2	327	89	19453	4.01051	1	0.854868	0.854502
GO:0010508~positive regulation of autophagy	6	1.68539	0.0169461	PLEKHF1, TP53INP2, ZC3H12A, TLR9, SH3BP4, TRIM27	327	89	19453	4.01051	1	0.854868	0.854502
GO:0098609~cell-cell adhesion	9	2.52809	0.0173342	CYFIP2, NFASC, SRC, FAT1, BCL2, NPHP4, SCRIB, ITGAE, BAIAP2	327	195	19453	2.74566	1	0.854868	0.854502
GO:0051881~regulation of mitochondrial membrane potential	4	1.1236	0.0175508	ADORA2A, UCP2, BCL2, LIPA	327	33	19453	7.21082	1	0.854868	0.854502
GO:0030183~B cell differentiation	6	1.68539	0.0184852	HDAC4, KLF6, PTPRC, SLC39A7, PIK3R1, TSHR	327	91	19453	3.92237	1	0.882008	0.881631
GO:1990845~adaptive thermogenesis	3	0.842697	0.0193315	UCP2, ZBTB7B, LIPA	327	13	19453	13.7283	1	0.903943	0.903556
GO:0045648~positive regulation of erythrocyte differentiation	4	1.1236	0.0205459	INPP5D, ACVR1B, ETS1, SMAP1	327	35	19453	6.79878	1	0.941887	0.941484
GO:0045893~positive regulation of transcription, DNA-templated	21	5.89888	0.0213364	HDAC4, DAXX, SRC, FOXK2, HMGA2, NFATC1, MLLT1, FOXK1, ETS1, PML, RUNX2, KLF6, RXRA, ASPH, TBL1XR1, TP53INP2, NFIC, PRDM16, ZNF516, TRIM27, WNT4	327	728	19453	1.71604	1	0.952342	0.951935
GO:0090630~activation of GTPase activity	7	1.96629	0.0216447	RAP1GAP2, ARHGEF10, GPR65, TBC1D14, CCR7, SCRIB, TBC1D16	327	129	19453	3.2281	1	0.952342	0.951935
GO:0035025~positive regulation of Rho protein signal transduction	4	1.1236	0.022142	PDGFRB, GPR65, MCF2L, GPR4	327	36	19453	6.60992	1	0.952342	0.951935
GO:0060041~retina development in camera-type eye	5	1.40449	0.0224033	SKI, SERPINF1, LPCAT1, NPHP4, CLN8	327	64	19453	4.6476	1	0.952342	0.951935
GO:0097028~dendritic cell differentiation	3	0.842697	0.0254576	BLK, LYN, TRPM2	327	15	19453	11.8979	1	1	1
GO:0071456~cellular response to hypoxia	7	1.96629	0.0255122	RPTOR, SRC, DNMT3A, BCL2, P4HB, NDRG1, SLC9A1	327	134	19453	3.10765	1	1	1
GO:0010942~positive regulation of cell death	4	1.1236	0.0255316	ZC3H12A, UCP2, DNMT3A, CIDEB	327	38	19453	6.26203	1	1	1
GO:0007169~transmembrane receptor protein tyrosine kinase signaling pathway	7	1.96629	0.0280405	BLK, LYN, PDGFRB, ZAP70, SRC, FLT4, CLNK	327	137	19453	3.0396	1	1	1
GO:0045651~positive regulation of macrophage differentiation	3	0.842697	0.0287771	MIR145, PRKCA, TRIB1	327	16	19453	11.1542	1	1	1
GO:0008625~extrinsic apoptotic signaling pathway via death domain receptors	4	1.1236	0.0291836	DAXX, ITPRIP, BCL2, PIK3R1	327	40	19453	5.94893	1	1	1
GO:0071902~positive regulation of protein serine/threonine kinase activity	4	1.1236	0.0311077	RPTOR, RALB, SRC, HMGA2	327	41	19453	5.80383	1	1	1
GO:0016236~macroautophagy	5	1.40449	0.0313126	SRC, VTI1A, VPS37B, VPS28, TECPR1	327	71	19453	4.18939	1	1	1
GO:0002407~dendritic cell chemotaxis	3	0.842697	0.0322589	CCR1, TRPM2, CCR7	327	17	19453	10.4981	1	1	1
GO:0050862~positive regulation of T cell receptor signaling pathway	3	0.842697	0.0322589	CD81, CCR7, LIPA	327	17	19453	10.4981	1	1	1
GO:0035108~limb morphogenesis	3	0.842697	0.0322589	ASPH, IQCE, PCSK5	327	17	19453	10.4981	1	1	1
GO:0002021~response to dietary excess	3	0.842697	0.0322589	TBL1XR1, STK39, LIPA	327	17	19453	10.4981	1	1	1
GO:0018107~peptidyl-threonine phosphorylation	5	1.40449	0.0327323	STK39, BCL2, PRKCA, CDC42BPB, ACVR1B	327	72	19453	4.1312	1	1	1
GO:0032869~cellular response to insulin stimulus	6	1.68539	0.0329902	SRC, UCP2, PIK3R1, LPIN1, PRKCZ, SLC9A1	327	106	19453	3.36732	1	1	1
GO:1900016~negative regulation of cytokine production involved in inflammatory response	4	1.1236	0.0330968	ZC3H12A, SIRPA, NLRC3, ADCY7	327	42	19453	5.66565	1	1	1
GO:0045659~negative regulation of neutrophil differentiation	2	0.561798	0.0332367	INPP5D, TRIB1	327	2	19453	59.4893	1	1	1
GO:0007420~brain development	10	2.80899	0.0346263	KDM4B, NFASC, SETD1A, DHX37, AATK, TSPAN2, SYNJ2, ARRB2, PROX1, BAIAP2	327	264	19453	2.25338	1	1	1
GO:0007568~aging	7	1.96629	0.037642	PDGFRB, GJB6, SERPINF1, UCP2, DNMT3A, SCAP, MBP	327	147	19453	2.83282	1	1	1
GO:0060326~cell chemotaxis	5	1.40449	0.0387831	PDGFRB, CCR1, CCRL2, CCR7, ARRB2	327	76	19453	3.91377	1	1	1
GO:0048863~stem cell differentiation	4	1.1236	0.0394507	HMGA2, JARID2, RUNX2, SLC9A1	327	45	19453	5.28794	1	1	1
GO:0002076~osteoblast development	3	0.842697	0.0396842	HDAC4, LIMD1, RUNX2	327	19	19453	9.39305	1	1	1
GO:0070374~positive regulation of ERK1 and ERK2 cascade	9	2.52809	0.0405571	PDGFRB, CCR1, PTPRC, SRC, FLT4, CCR7, PRKCA, ARRB2, PRKCZ	327	230	19453	2.32784	1	1	1
GO:0008360~regulation of cell shape	7	1.96629	0.0420046	FGD3, MKLN1, WDR1, RAC2, SHROOM3, LIMD1, BAIAP2	327	151	19453	2.75778	1	1	1
GO:0030036~actin cytoskeleton organization	9	2.52809	0.0422878	FGD3, MKLN1, ARHGEF10, MIR145, IQSEC1, NPHP4, CDC42BPB, ARHGAP26, SPTBN1	327	232	19453	2.30777	1	1	1
GO:0097202~activation of cysteine-type endopeptidase activity	3	0.842697	0.0436154	CYFIP2, ASPH, CIDEB	327	20	19453	8.92339	1	1	1
GO:0045494~photoreceptor cell maintenance	4	1.1236	0.0440048	SLC2A1, CDH23, NPHP4, CLN8	327	47	19453	5.06292	1	1	1
GO:0009636~response to toxic substance	5	1.40449	0.0471858	LYN, PDGFRB, DNMT3A, BCL2, MBP	327	81	19453	3.67218	1	1	1
GO:0060314~regulation of ryanodine-sensitive calcium-release channel activity	3	0.842697	0.0476846	ASPH, PDE4D, HRC	327	21	19453	8.49847	1	1	1
GO:0010880~regulation of release of sequestered calcium ion into cytosol by sarcoplasmic reticulum	3	0.842697	0.0476846	ASPH, PDE4D, HRC	327	21	19453	8.49847	1	1	1
GO:0034097~response to cytokine	4	1.1236	0.0488087	MAPKAPK2, BCL2, TIMP2, PML	327	49	19453	4.85627	1	1	1
GO:1903615~positive regulation of protein tyrosine phosphatase activity	2	0.561798	0.0494397	PTPRC, SLC39A10	327	3	19453	39.6595	1	1	1
GO:0002431~Fc receptor mediated stimulatory signaling pathway	2	0.561798	0.0494397	BLK, LYN	327	3	19453	39.6595	1	1	1
GO:0021747~cochlear nucleus development	2	0.561798	0.0494397	BCL2, SCRIB	327	3	19453	39.6595	1	1	1
GO:0030241~skeletal muscle myosin thick filament assembly	2	0.561798	0.0494397	MYH11, TTN	327	3	19453	39.6595	1	1	1
GO:0015821~methionine transport	2	0.561798	0.0494397	SLC7A5, SLC43A2	327	3	19453	39.6595	1	1	1
GO:0046628~positive regulation of insulin receptor signaling pathway	3	0.842697	0.0518861	SRC, ZBTB7B, PRKCZ	327	22	19453	8.11218	1	1	1
GO:0042116~macrophage activation	3	0.842697	0.0518861	FCER2, SLC11A1, STK39	327	22	19453	8.11218	1	1	1
GO:0031623~receptor internalization	4	1.1236	0.0538578	RALB, GRK4, CD81, ARRB2	327	51	19453	4.66583	1	1	1
GO:0008630~intrinsic apoptotic signaling pathway in response to DNA damage	4	1.1236	0.0538578	BCL2, CIDEB, PIK3R1, PML	327	51	19453	4.66583	1	1	1
GO:0009968~negative regulation of signal transduction	4	1.1236	0.0538578	INPP5D, RGS12, PRR5L, RGS9	327	51	19453	4.66583	1	1	1
GO:0050896~response to stimulus	5	1.40449	0.0545777	HDAC4, CALHM1, CDH23, RDH5, SPTBN1	327	85	19453	3.49937	1	1	1
GO:0051056~regulation of small GTPase mediated signal transduction	6	1.68539	0.0546256	RAP1GAP2, FGD3, ARHGEF10, MCF2L, FAM13A, ARHGAP26	327	122	19453	2.9257	1	1	1
GO:0010613~positive regulation of cardiac muscle hypertrophy	3	0.842697	0.0562141	PRKCA, PDE9A, SLC9A1	327	23	19453	7.75947	1	1	1
GO:0008203~cholesterol metabolic process	5	1.40449	0.056518	RXRA, OSBPL5, SCAP, CLN8, ABCG1	327	86	19453	3.45868	1	1	1
GO:0043524~negative regulation of neuron apoptotic process	7	1.96629	0.0569433	ADORA2A, WFS1, UCP2, BCL2, ARRB2, CLN8, CPEB4	327	163	19453	2.55476	1	1	1
GO:0000209~protein polyubiquitination	8	2.24719	0.0578566	MGRN1, RNF19A, UBR5, BCL2, SPOP, UBE4A, TRIM27, PSMB9	327	205	19453	2.32153	1	1	1
GO:0016575~histone deacetylation	4	1.1236	0.0591469	HDAC4, TBL1XR1, HDAC11, RCOR1	327	53	19453	4.48976	1	1	1
GO:0016925~protein sumoylation	4	1.1236	0.0591469	HDAC4, NSMCE1, TRIM27, PML	327	53	19453	4.48976	1	1	1
GO:0008361~regulation of cell size	3	0.842697	0.0606635	RPTOR, RAP1GAP2, CLN8	327	24	19453	7.43616	1	1	1
GO:0010881~regulation of cardiac muscle contraction by regulation of the release of sequestered calcium ion	3	0.842697	0.0606635	ASPH, HRC, CACNA1C	327	24	19453	7.43616	1	1	1
GO:0007605~sensory perception of sound	7	1.96629	0.061118	CEACAM16, WDR1, WFS1, GJB6, CDH23, MBP, CDC14A	327	166	19453	2.50858	1	1	1
GO:0051209~release of sequestered calcium ion into cytosol	4	1.1236	0.0618797	TRPM2, PTPRC, RASA3, CCR7	327	54	19453	4.40661	1	1	1
GO:0045944~positive regulation of transcription from RNA polymerase II promoter	29	8.14607	0.0630684	HDAC4, CD81, CEBPE, FOXK2, PIK3R1, GABPB1, ETS1, SLC9A1, SBNO2, RXRA, ZC3H12A, PRDM16, ZBTB7B, KLF13, SLC11A1, HMGA2, NFATC1, PROX1, BAZ1B, POU2F2, RUNX2, SKI, KLF6, TFDP1, TBL1XR1, MTF1, NFIC, TLR9, LPIN1	327	1232	19453	1.40032	1	1	1
GO:0030099~myeloid cell differentiation	3	0.842697	0.0652289	CEBPE, LIPA, PML	327	25	19453	7.13872	1	1	1
GO:0071577~zinc II ion transmembrane transport	3	0.842697	0.0652289	TRPM2, SLC39A10, SLC39A7	327	25	19453	7.13872	1	1	1
GO:0015818~isoleucine transport	2	0.561798	0.065372	SLC7A5, SLC43A2	327	4	19453	29.7446	1	1	1
GO:0060837~blood vessel endothelial cell differentiation	2	0.561798	0.065372	PROX1, LIPA	327	4	19453	29.7446	1	1	1
GO:2000670~positive regulation of dendritic cell apoptotic process	2	0.561798	0.065372	BLK, LYN	327	4	19453	29.7446	1	1	1
GO:0002902~regulation of B cell apoptotic process	2	0.561798	0.065372	BLK, LYN	327	4	19453	29.7446	1	1	1
GO:0070668~positive regulation of mast cell proliferation	2	0.561798	0.065372	LYN, RAC2	327	4	19453	29.7446	1	1	1
GO:0015823~phenylalanine transport	2	0.561798	0.065372	SLC7A5, SLC43A2	327	4	19453	29.7446	1	1	1
GO:0015770~sucrose transport	2	0.561798	0.065372	SLC45A4, SLC45A1	327	4	19453	29.7446	1	1	1
GO:0070667~negative regulation of mast cell proliferation	2	0.561798	0.065372	BLK, LYN	327	4	19453	29.7446	1	1	1
GO:1900039~positive regulation of cellular response to hypoxia	2	0.561798	0.065372	MIR145, DNMT3A	327	4	19453	29.7446	1	1	1
GO:0043124~negative regulation of I-kappaB kinase/NF-kappaB signaling	4	1.1236	0.0675181	TRIM39, ZC3H12A, NLRC3, ARRB2	327	56	19453	4.24924	1	1	1
GO:0043433~negative regulation of sequence-specific DNA binding transcription factor activity	5	1.40449	0.0689253	HDAC4, TFDP1, WFS1, PROX1, TRIB1	327	92	19453	3.23311	1	1	1
GO:0019722~calcium-mediated signaling	5	1.40449	0.0689253	CCR1, ZAP70, RCAN2, CCRL2, CCR7	327	92	19453	3.23311	1	1	1
GO:1900273~positive regulation of long-term synaptic potentiation	3	0.842697	0.0699052	ADORA2A, PRKAR1B, PDE9A	327	26	19453	6.86415	1	1	1
GO:0032740~positive regulation of interleukin-17 production	3	0.842697	0.0699052	SLC7A5, SLAMF6, ZBTB7B	327	26	19453	6.86415	1	1	1
GO:0001782~B cell homeostasis	3	0.842697	0.0699052	DOCK10, LYN, BCL2	327	26	19453	6.86415	1	1	1
GO:0007189~adenylate cyclase-activating G-protein coupled receptor signaling pathway	6	1.68539	0.0714938	ADORA2A, GPR65, GPR4, ADCY7, TSHR, GPR157	327	132	19453	2.70406	1	1	1
GO:0045860~positive regulation of protein kinase activity	4	1.1236	0.0733817	DAXX, PTPRC, PRKAG2, CCR7	327	58	19453	4.10271	1	1	1
GO:0045879~negative regulation of smoothened signaling pathway	3	0.842697	0.0746875	MGRN1, KIF7, RUNX2	327	27	19453	6.60992	1	1	1
GO:0045453~bone resorption	3	0.842697	0.0746875	SRC, LRRK1, RAC2	327	27	19453	6.60992	1	1	1
GO:0001666~response to hypoxia	7	1.96629	0.0763331	UCP2, SLC2A1, SCAP, LIMD1, SOD3, CBFA2T3, PML	327	176	19453	2.36605	1	1	1
GO:0050731~positive regulation of peptidyl-tyrosine phosphorylation	5	1.40449	0.077912	PTPRC, SRC, CD81, LRRK1, ARRB2	327	96	19453	3.0984	1	1	1
GO:2001243~negative regulation of intrinsic apoptotic signaling pathway	3	0.842697	0.0795709	SRC, PLAUR, BCL2	327	28	19453	6.37385	1	1	1
GO:0010332~response to gamma radiation	3	0.842697	0.0795709	PTPRC, BCL2, PML	327	28	19453	6.37385	1	1	1
GO:0051928~positive regulation of calcium ion transport	3	0.842697	0.0795709	CCR1, WFS1, ARRB2	327	28	19453	6.37385	1	1	1
GO:0032703~negative regulation of interleukin-2 production	3	0.842697	0.0795709	PTPRC, LAPTM5, TRIM27	327	28	19453	6.37385	1	1	1
GO:0001678~cellular glucose homeostasis	3	0.842697	0.0795709	FOXK2, FOXK1, PIK3R1	327	28	19453	6.37385	1	1	1
GO:1903936~cellular response to sodium arsenite	2	0.561798	0.081038	DAXX, ZC3H12A	327	5	19453	23.7957	1	1	1
GO:0035821~modification of morphology or physiology of other organism	2	0.561798	0.081038	S100A9, CAMP	327	5	19453	23.7957	1	1	1
GO:0032649~regulation of interferon-gamma production	2	0.561798	0.081038	SIRPA, CCR7	327	5	19453	23.7957	1	1	1
GO:0002513~tolerance induction to self antigen	2	0.561798	0.081038	BLK, LYN	327	5	19453	23.7957	1	1	1
GO:0030335~positive regulation of cell migration	9	2.52809	0.0813745	LYN, SEMA6B, PDGFRB, CCR1, SEMA5B, FLT4, MYADM, PRKCA, PIK3R1	327	267	19453	2.00526	1	1	1
GO:0006893~Golgi to plasma membrane transport	3	0.842697	0.0845506	GGA3, OSBPL5, SEC16A	327	29	19453	6.15407	1	1	1
GO:0046330~positive regulation of JNK cascade	5	1.40449	0.085017	SH3RF3, FLT4, TLR9, CCR7, TRAF1	327	99	19453	3.00451	1	1	1
GO:0001934~positive regulation of protein phosphorylation	8	2.24719	0.086795	LYN, DAXX, RALB, FLT4, PLAUR, PRR5L, ARRB2, CAMP	327	226	19453	2.10582	1	1	1
GO:0071356~cellular response to tumor necrosis factor	6	1.68539	0.0868205	HDAC4, ZC3H12A, HMHB1, NFATC1, PRPF8, CAMP	327	140	19453	2.54954	1	1	1
GO:0048010~vascular endothelial growth factor receptor signaling pathway	3	0.842697	0.0896222	SRC, FLT4, MAPKAPK2	327	30	19453	5.94893	1	1	1
GO:0034113~heterotypic cell-cell adhesion	3	0.842697	0.0896222	PTPRC, RNASE10, SIRPA	327	30	19453	5.94893	1	1	1
GO:0032967~positive regulation of collagen biosynthetic process	3	0.842697	0.0896222	PDGFRB, ARRB2, WNT4	327	30	19453	5.94893	1	1	1
GO:0018105~peptidyl-serine phosphorylation	7	1.96629	0.0899192	SRC, MAPKAPK2, STK39, BCL2, PRKCA, PRKCZ, CSNK1G2	327	184	19453	2.26318	1	1	1
GO:0050852~T cell receptor signaling pathway	6	1.68539	0.0909008	ZAP70, PTPRC, INPP5D, PDE4D, ZC3H12A, PSMB9	327	142	19453	2.51363	1	1	1
GO:0071230~cellular response to amino acid stimulus	4	1.1236	0.0922563	RPTOR, DNMT3A, SH3BP4, CPEB4	327	64	19453	3.71808	1	1	1
GO:0090402~oncogene-induced cell senescence	2	0.561798	0.0964422	HMGA2, PML	327	6	19453	19.8298	1	1	1
GO:0051902~negative regulation of mitochondrial depolarization	2	0.561798	0.0964422	SRC, BCL2	327	6	19453	19.8298	1	1	1
GO:0002576~platelet degranulation	2	0.561798	0.0964422	BLK, LYN	327	6	19453	19.8298	1	1	1
GO:0002768~immune response-regulating cell surface receptor signaling pathway	2	0.561798	0.0964422	LYN, BTLA	327	6	19453	19.8298	1	1	1
GO:0007182~common-partner SMAD protein phosphorylation	2	0.561798	0.0964422	SPTBN1, PML	327	6	19453	19.8298	1	1	1
GO:0040036~regulation of fibroblast growth factor receptor signaling pathway	2	0.561798	0.0964422	FAM20C, RUNX2	327	6	19453	19.8298	1	1	1
GO:0060414~aorta smooth muscle tissue morphogenesis	2	0.561798	0.0964422	MIR145, PROX1	327	6	19453	19.8298	1	1	1
GO:0072675~osteoclast fusion	2	0.561798	0.0964422	SBNO2, CD81	327	6	19453	19.8298	1	1	1
GO:0050855~regulation of B cell receptor signaling pathway	2	0.561798	0.0964422	BLK, LYN	327	6	19453	19.8298	1	1	1
GO:0051222~positive regulation of protein transport	2	0.561798	0.0964422	SRC, PRKCZ	327	6	19453	19.8298	1	1	1
GO:0051712~positive regulation of killing of cells of other organism	2	0.561798	0.0964422	FCER2, PRF1	327	6	19453	19.8298	1	1	1
GO:0048845~venous blood vessel morphogenesis	2	0.561798	0.0964422	HEG1, PROX1	327	6	19453	19.8298	1	1	1
GO:0002925~positive regulation of humoral immune response mediated by circulating immunoglobulin	2	0.561798	0.0964422	FCER2, PTPRC	327	6	19453	19.8298	1	1	1
GO:0016477~cell migration	9	2.52809	0.0969281	PDGFRB, DOCK5, FAT1, SIRPA, SCRIB, CDC42BPB, LIMD1, PRKCZ, SLC9A1	327	278	19453	1.92591	1	1	1

## Sheet: Supplementary Table 17
Term	Count	%	PValue	Genes	List Total	Pop Hits	Pop Total	Fold Enrichment	Bonferroni	Benjamini	FDR
GO:0045944~positive regulation of transcription from RNA polymerase II promoter	40	11.3314	0.000122	YAP1, ZNF593, NOTCH1, PLA2G1B, EPAS1, LRP5, SLC40A1, GPS2, PIK3R2, FGF1, PTMS, FSTL3, SBNO2, RXRA, ZNF827, ZC3H12A, PRDM16, RPS6KA1, CYTL1, E2F4, RREB1, BCL9L, WWTR1, ZFHX3, AUTS2, NFATC1, SIRT7, INHBA, PROX1, PBX1, ELL3, GFI1B, BMP2, SMO, MAFG, TCEA2, HOXB4, TLR9, HOXB3, TP73	330	1232	19453	1.91391	0.229094	0.260172	0.260172
GO:0035556~intracellular signal transduction	20	5.66572	0.000357	TRAF3IP2, RGS14, PLA2G1B, MAST3, CDC42BPG, PRKAG2, NFATC1, CDC42BPB, MAPK13, NRBP2, TYROBP, ADCY9, MAPKAPK2, DDIT4, RPS6KA1, SH3BP5, SH2B3, ARHGEF5, MAP4K4, TNS1	330	462	19453	2.55188	0.533405	0.381079	0.381079
GO:0045893~positive regulation of transcription, DNA-templated	26	7.36544	0.000672	YAP1, NOTCH1, LRP5, MLLT1, PRDM11, ACTB, PDLIM1, RAI1, MTA1, RXRA, CDH1, PRDM16, RPS6KA1, HIVEP3, ATXN7L3, RREB1, NFRKB, ARHGEF11, NFE2, ZFHX3, BRPF1, NFATC1, INHBA, BMP2, ASPH, TP73	330	728	19453	2.1053	0.762112	0.47849	0.47849
GO:0001755~neural crest cell migration	6	1.69972	0.00127	SEMA6B, EFNB1, SEMA7A, SMO, SEMA3B, RADIL	330	48	19453	7.36856	0.933335	0.552278	0.552278
GO:0001525~angiogenesis	13	3.68272	0.0014	EGFL7, NOTCH1, PLXND1, EPAS1, FLT4, FGF1, HSPG2, HS6ST1, ZC3H12A, LEPR, HOXB3, ADAM8, EPHB3	330	255	19453	3.00522	0.950086	0.552278	0.552278
GO:0010524~positive regulation of calcium ion transport into cytosol	4	1.13314	0.00188	P2RX5, ADCYAP1R1, ASPH, PLA2G1B	330	15	19453	15.7196	0.981896	0.552278	0.552278
GO:0030036~actin cytoskeleton organization	12	3.39943	0.00206	ARHGEF11, PDLIM1, ARHGEF10, SPTBN5, INF2, TYROBP, AUTS2, CDC42BPG, EHBP1L1, CDC42BPB, PDLIM4, ARHGEF5	330	232	19453	3.04906	0.987901	0.552278	0.552278
GO:0001938~positive regulation of endothelial cell proliferation	7	1.983	0.00207	RPTOR, BMP2, EGFL7, FLT4, PLXNB3, PROX1, HSPG2	330	78	19453	5.29025	0.987999	0.552278	0.552278
GO:0006366~transcription from RNA polymerase II promoter	12	3.39943	0.00278	BMP2, NOTCH1, NCAPG2, SLC40A1, GTF2IRD1, CYTL1, INHBA, PROX1, RREB1, ELL3, PAX1, BCL9L	330	241	19453	2.93519	0.997382	0.615876	0.615876
GO:0071526~semaphorin-plexin signaling pathway	5	1.41643	0.00309	SEMA6B, SEMA7A, PLXND1, SEMA3B, PLXNB3	330	36	19453	8.18729	0.998653	0.615876	0.615876
GO:0007275~multicellular organism development	9	2.54958	0.00317	DDR1, NFE2, CUX1, CDH1, FLT4, LEPR, RREB1, FSTL1, FSTL3	330	144	19453	3.68428	0.99887	0.615876	0.615876
GO:0090630~activation of GTPase activity	8	2.26629	0.00641	RAP1GAP2, SGSM1, ARHGEF10, TBC1D9B, AGAP1, TBC1D14, ARHGEF5, TBC1D16	330	129	19453	3.65572	0.999999	1	1
GO:0009410~response to xenobiotic stimulus	12	3.39943	0.00776	RPTOR, ADCYAP1R1, TRAF3IP2, ADORA2A, CDH1, BGLAP, ABCA3, GNA12, INHBA, ACACB, HSPG2, TP73	330	277	19453	2.55372	1	1	1
GO:0048538~thymus development	5	1.41643	0.00871	JARID2, MAD1L1, PBX1, EPHB3, PAX1	330	48	19453	6.14047	1	1	1
GO:0008285~negative regulation of cell proliferation	16	4.53258	0.0125	DDR1, NOTCH1, DHCR24, INHBA, PROX1, HSPG2, NDRG1, CBFA2T3, RNF41, BMP2, ADORA2A, ASPH, LMNA, CD9, SH2B3, TP73	330	462	19453	2.04151	1	1	1
GO:0000122~negative regulation of transcription from RNA polymerase II promoter	28	7.93201	0.0137	YAP1, NOTCH1, ANKRD33, GPS2, AEBP1, BACH2, MTA1, RXRA, CUX1, PRDM16, JARID2, ZNF764, RREB1, WWTR1, ZFHX3, KCNIP3, SIRT7, PROX1, DNAJC17, NR2F6, NCOR2, GFI1B, BMP2, SMO, MAFG, HOXB4, HOXB3, GTF2IRD1	330	1016	19453	1.62456	1	1	1
GO:0010800~positive regulation of peptidyl-threonine phosphorylation	4	1.13314	0.0139	RPTOR, TRPC5, TNKS1BP1, PRKAG2	330	30	19453	7.8598	1	1	1
GO:0030335~positive regulation of cell migration	11	3.11615	0.0158	SEMA6B, SEMA7A, BMP2, MIR10A, NOTCH1, SMO, FLT4, SEMA3B, FGF1, MAP4K4, MYLK	330	267	19453	2.42859	1	1	1
GO:0021915~neural tube development	4	1.13314	0.0165	NOTCH1, ITPK1, DCHS1, PROX1	330	32	19453	7.36856	1	1	1
GO:0051056~regulation of small GTPase mediated signal transduction	7	1.983	0.0176	ARHGEF11, RAP1GAP2, PLEKHG4, ARHGEF10, PLEKHG5, PLEKHG6, ARHGEF5	330	122	19453	3.38229	1	1	1
GO:0007188~adenylate cyclase-modulating G-protein coupled receptor signaling pathway	5	1.41643	0.0176	ADCYAP1R1, GRK5, ADORA2A, GIPR, GNA12	330	59	19453	4.99563	1	1	1
GO:0042771~intrinsic apoptotic signaling pathway in response to DNA damage by p53 class mediator	4	1.13314	0.018	DDIT4, ELL3, TP73, PHLDA3	330	33	19453	7.14527	1	1	1
GO:0001649~osteoblast differentiation	7	1.983	0.0218	WWTR1, SEMA7A, BMP2, SMO, BGLAP, KCNQ1OT1, SIRT7	330	128	19453	3.22375	1	1	1
GO:0008284~positive regulation of cell proliferation	17	4.81586	0.0238	WWTR1, TRPC5, NOTCH1, HPSE2, PLA2G1B, IL15, FLT4, LRP5, PROX1, FGF1, ACTB, PBX1, CLDN5, BMP2, GRK5, SSR1, AVP	330	545	19453	1.83876	1	1	1
GO:0048536~spleen development	4	1.13314	0.0244	TRAF3IP2, HOXB4, JARID2, PBX1	330	37	19453	6.37281	1	1	1
GO:0009952~anterior/posterior pattern specification	6	1.69972	0.0245	SMO, SCMH1, LRP5, HOXB4, HOXB3, PBX1	330	97	19453	3.6463	1	1	1
GO:1905907~negative regulation of amyloid fibril formation	3	0.849858	0.0259	CLU, HSPG2, PFDN6	330	15	19453	11.7897	1	1	1
GO:0006357~regulation of transcription from RNA polymerase II promoter	41	11.6147	0.0278	NOTCH1, ZBTB47, EPAS1, SP140, PTAFR, GPS2, LIN9, BACH2, ACTB, FSTL3, PDLIM1, RAI1, RXRA, CUX1, PRDM16, HIVEP3, E2F4, ZNF764, ATXN7L3, RREB1, ZNF860, NFE2, ZFHX3, BRPF1, ANXA4, PCGF3, SMAD9, NFATC1, SIRT7, RFX1, INHBA, PROX1, PBX1, NR2F6, PAX1, NCOR2, GFI1B, MAFG, HOXB4, HOXB3, TP73	330	1736	19453	1.39222	1	1	1
GO:0043408~regulation of MAPK cascade	4	1.13314	0.028	FLT4, PRDM11, RNF41, MAP4K4	330	39	19453	6.046	1	1	1
GO:0010595~positive regulation of endothelial cell migration	5	1.41643	0.0281	FLT4, ZC3H12A, PROX1, FGF1, RIN2	330	68	19453	4.33445	1	1	1
GO:0010628~positive regulation of gene expression	16	4.53258	0.0318	YAP1, NOTCH1, ANK2, INHBA, FGF1, CLU, CLDN5, BMP2, TYROBP, SMO, MAFG, KCNQ1OT1, LMNA, ZC3H12A, TLR9, AVP	330	519	19453	1.81729	1	1	1
GO:0006790~sulfur compound metabolic process	3	0.849858	0.0328	CHST9, CHST1, CHST3	330	17	19453	10.4027	1	1	1
GO:0006354~DNA-templated transcription, elongation	2	0.566572	0.0335	TCEA2, ELL3	330	2	19453	58.9485	1	1	1
GO:1990683~DNA double-strand break attachment to nuclear envelope	2	0.566572	0.0335	LMNA, IFFO1	330	2	19453	58.9485	1	1	1
GO:0006954~inflammatory response	14	3.96601	0.0351	SEMA7A, TRAF3IP2, IL15, PTAFR, HSPG2, MSMP, BMP2, ADORA2A, MAPKAPK2, ZC3H12A, TLR9, CHST1, ADAM8, ABCF1	330	436	19453	1.89284	1	1	1
GO:0042307~positive regulation of protein import into nucleus	4	1.13314	0.036	SMO, CDH1, ZC3H12A, PIK3R2	330	43	19453	5.48358	1	1	1
GO:0007165~signal transduction	32	9.06516	0.0361	GUCY2D, PLA2G1B, EPAS1, PIK3R2, LSP1, FGF1, NDRG2, NDRG1, MTA1, GRK5, BGLAP, RPS6KA1, SH3BP5, CYTL1, CNGA3, SH2B3, TLE3, IL15, KCNIP3, ANXA4, ITPK1, ANK2, CDC42BPB, MSMP, P2RX5, TYROBP, ADCY9, STK24, NOSTRIN, RADIL, AVP, RIN2	330	1307	19453	1.44327	1	1	1
GO:0043129~surfactant homeostasis	3	0.849858	0.0365	EPAS1, ABCA3, LPCAT1	330	18	19453	9.82475	1	1	1
GO:0051726~regulation of cell cycle	10	2.83286	0.0392	ZFHX3, GRK5, CABLES1, DHCR24, LIN9, PRDM11, DTL, NFRKB, ACTB, TP73	330	268	19453	2.19957	1	1	1
GO:0006468~protein phosphorylation	14	3.96601	0.0397	CDC42BPG, AATK, PRKAG2, PTK6, CDC42BPB, MYLK, NRBP2, BMP2, STK24, GRK5, MAPKAPK2, RPS6KA1, EPHB3, MAP4K4	330	444	19453	1.85874	1	1	1
GO:0006650~glycerophospholipid metabolic process	3	0.849858	0.0403	WWTR1, LPCAT1, AGPAT3	330	19	19453	9.30766	1	1	1
GO:0030206~chondroitin sulfate biosynthetic process	3	0.849858	0.0403	CHST9, XYLT1, CHST3	330	19	19453	9.30766	1	1	1
GO:0035329~hippo signaling	3	0.849858	0.0443	YAP1, WWTR1, DCHS1	330	20	19453	8.84227	1	1	1
GO:0050673~epithelial cell proliferation	4	1.13314	0.045	YAP1, NOTCH1, SMO, FGF1	330	47	19453	5.01689	1	1	1
GO:0035914~skeletal muscle cell differentiation	4	1.13314	0.0474	NOTCH1, ANKRD33, HIVEP3, BCL9L	330	48	19453	4.91237	1	1	1
GO:0007411~axon guidance	8	2.26629	0.0483	SEMA6B, PLEKHG4, EFNB1, SEMA7A, NOTCH1, SEMA3B, DSCAML1, EPHB3	330	195	19453	2.4184	1	1	1
GO:0090201~negative regulation of release of cytochrome c from mitochondria	3	0.849858	0.0485	LMNA, AVP, CLU	330	21	19453	8.42121	1	1	1
GO:0030433~ubiquitin-dependent ERAD pathway	5	1.41643	0.0485	EDEM1, TMEM129, FBXO17, RNF175, FAM8A1	330	81	19453	3.6388	1	1	1
GO:0051799~negative regulation of hair follicle development	2	0.566572	0.0499	SMO, INHBA	330	3	19453	39.299	1	1	1
GO:0003192~mitral valve formation	2	0.566572	0.0499	NOTCH1, DCHS1	330	3	19453	39.299	1	1	1
GO:1904059~regulation of locomotor rhythm	2	0.566572	0.0499	ZFHX3, OPRL1	330	3	19453	39.299	1	1	1
GO:0042335~cuticle development	2	0.566572	0.0499	DUOX1, TMEM79	330	3	19453	39.299	1	1	1
GO:0030324~lung development	5	1.41643	0.0522	NOTCH1, EPAS1, ABCA3, PROX1, FGF1	330	83	19453	3.55111	1	1	1
GO:0050714~positive regulation of protein secretion	4	1.13314	0.0525	ADORA2A, PLA2G1B, ADAM8, FRMD4A	330	50	19453	4.71588	1	1	1
GO:0060307~regulation of ventricular cardiac muscle cell membrane repolarization	3	0.849858	0.0527	KCNQ1, ANK2, SCN4B	330	22	19453	8.03843	1	1	1
GO:0048839~inner ear development	4	1.13314	0.0551	BMP2, KCNQ1, MAPKAPK2, CYTL1	330	51	19453	4.62341	1	1	1
GO:1901214~regulation of neuron death	3	0.849858	0.0571	CTSZ, DHCR24, CLU	330	23	19453	7.68893	1	1	1
GO:0097191~extrinsic apoptotic signaling pathway	4	1.13314	0.0577	YAP1, KRT8, INHBA, RNF41	330	52	19453	4.5345	1	1	1
GO:0006633~fatty acid biosynthetic process	4	1.13314	0.0577	PECR, PLA2G1B, PRKAG2, ACACB	330	52	19453	4.5345	1	1	1
GO:0006979~response to oxidative stress	6	1.69972	0.0613	PDLIM1, DUOX1, SCARA3, RGS14, GPX5, DHCR24	330	125	19453	2.82953	1	1	1
GO:0051131~chaperone-mediated protein complex assembly	3	0.849858	0.0616	LONP1, CLU, PFDN6	330	24	19453	7.36856	1	1	1
GO:0007162~negative regulation of cell adhesion	4	1.13314	0.0632	MIR10A, PLXND1, PLXNB3, HSPG2	330	54	19453	4.36655	1	1	1
GO:0033490~cholesterol biosynthetic process via lathosterol	2	0.566572	0.066	DHCR24, DHCR7	330	4	19453	29.4742	1	1	1
GO:0060242~contact inhibition	2	0.566572	0.066	YAP1, SMO	330	4	19453	29.4742	1	1	1
GO:1990963~establishment of blood-retinal barrier	2	0.566572	0.066	CLDN5, LRP5	330	4	19453	29.4742	1	1	1
GO:0060421~positive regulation of heart growth	2	0.566572	0.066	PROX1, ACACB	330	4	19453	29.4742	1	1	1
GO:0033489~cholesterol biosynthetic process via desmosterol	2	0.566572	0.066	DHCR24, DHCR7	330	4	19453	29.4742	1	1	1
GO:0003273~cell migration involved in endocardial cushion formation	2	0.566572	0.066	NOTCH1, DCHS1	330	4	19453	29.4742	1	1	1
GO:0010718~positive regulation of epithelial to mesenchymal transition	4	1.13314	0.0661	WWTR1, BMP2, ADAM8, BCL9L	330	55	19453	4.28716	1	1	1
GO:0035176~social behavior	4	1.13314	0.0661	RPTOR, KCNQ1, AVP, SHANK1	330	55	19453	4.28716	1	1	1
GO:0030218~erythrocyte differentiation	4	1.13314	0.0661	EPAS1, KCNQ1, NCAPG2, INHBA	330	55	19453	4.28716	1	1	1
GO:0061484~hematopoietic stem cell homeostasis	3	0.849858	0.0663	OCIAD2, FSTL1, ARHGEF5	330	25	19453	7.07382	1	1	1
GO:0043154~negative regulation of cysteine-type endopeptidase activity involved in apoptotic process	4	1.13314	0.069	ADORA2A, RPS6KA1, DHCR24, AVP	330	56	19453	4.21061	1	1	1
GO:0006968~cellular defense response	4	1.13314	0.069	TYROBP, ADORA2A, ADORA2B, LSP1	330	56	19453	4.21061	1	1	1
GO:0010875~positive regulation of cholesterol efflux	3	0.849858	0.0759	RXRA, ABCA3, GPS2	330	27	19453	6.54983	1	1	1
GO:0071456~cellular response to hypoxia	6	1.69972	0.0775	RPTOR, NOTCH1, EPAS1, LMNA, ADAM8, NDRG1	330	134	19453	2.63948	1	1	1
GO:0048856~anatomical structure development	4	1.13314	0.078	EGFL7, RXRA, PAX1, NR2F6	330	59	19453	3.99651	1	1	1
GO:0007266~Rho protein signal transduction	4	1.13314	0.078	ARHGEF11, PLEKHG5, GNA12, C15ORF62	330	59	19453	3.99651	1	1	1
GO:0001666~response to hypoxia	7	1.983	0.0788	PDLIM1, BMP2, EPAS1, DDIT4, LONP1, HSPG2, CBFA2T3	330	176	19453	2.34454	1	1	1
GO:0048843~negative regulation of axon extension involved in axon guidance	3	0.849858	0.0808	SEMA6B, SEMA7A, SEMA3B	330	28	19453	6.31591	1	1	1
GO:0031532~actin cytoskeleton reorganization	4	1.13314	0.0812	AUTS2, CDC42BPG, CDC42BPB, PDLIM4	330	60	19453	3.9299	1	1	1
GO:0072538~T-helper 17 type immune response	2	0.566572	0.0818	NOTCH1, TRAF3IP2	330	5	19453	23.5794	1	1	1
GO:1903936~cellular response to sodium arsenite	2	0.566572	0.0818	ZC3H12A, MAPK13	330	5	19453	23.5794	1	1	1
GO:0031960~response to corticosteroid	2	0.566572	0.0818	NOTCH1, CNGA3	330	5	19453	23.5794	1	1	1
GO:0008283~cell proliferation	7	1.983	0.0822	YAP1, ASPH, HPSE2, TACC3, HOXB4, CD9, PAX1	330	178	19453	2.3182	1	1	1
GO:0007169~transmembrane receptor protein tyrosine kinase signaling pathway	6	1.69972	0.0833	DDR1, FLT4, PTK6, SH2B3, SAMD10, EPHB3	330	137	19453	2.58169	1	1	1
GO:0045599~negative regulation of fat cell differentiation	4	1.13314	0.0843	YAP1, WWTR1, BMP2, GPS2	330	61	19453	3.86547	1	1	1
GO:0046777~protein autophosphorylation	7	1.983	0.0891	DDR1, GRK5, STK24, FLT4, MAPKAPK2, PTK6, EPHB3	330	182	19453	2.26725	1	1	1
GO:0009887~animal organ morphogenesis	6	1.69972	0.0936	TLE3, BMP2, E2F4, FGF1, HSPG2, PBX1	330	142	19453	2.49078	1	1	1
GO:0030913~paranodal junction assembly	2	0.566572	0.0973	CD9, ANK2	330	6	19453	19.6495	1	1	1
GO:0043620~regulation of DNA-templated transcription in response to stress	2	0.566572	0.0973	RGS14, RPS6KA1	330	6	19453	19.6495	1	1	1
GO:1904058~positive regulation of sensory perception of pain	2	0.566572	0.0973	PTAFR, OPRL1	330	6	19453	19.6495	1	1	1
GO:0072307~regulation of metanephric nephron tubule epithelial cell differentiation	2	0.566572	0.0973	YAP1, WWTR1	330	6	19453	19.6495	1	1	1
GO:0070086~ubiquitin-dependent endocytosis	2	0.566572	0.0973	NEURL1B, NEURL3	330	6	19453	19.6495	1	1	1
GO:0060414~aorta smooth muscle tissue morphogenesis	2	0.566572	0.0973	PROX1, MYLK	330	6	19453	19.6495	1	1	1
GO:0000902~cell morphogenesis	5	1.41643	0.0974	YAP1, CDH1, DCHS1, ADAM8, CLU	330	103	19453	2.86158	1	1	1

## Sheet: Supplementary Table 18
CpG	EA.TE.fixed	EA.seTE.fixed	EA.zval.fixed	EA.pval.fixed	AA.TE.fixed	AA.seTE.fixed	AA.zval.fixed	AA.pval.fixed	all.TE.fixed	all.seTE.fixed	all.zval.fixed	all.pval.fixed	all.I2	all.Q	all.heterogeneity.p	FDR.fixed	Genome_Build	CHR	MAPINFO	Chromosome_36	Coordinate_36	Strand	Probe_SNPs	Probe_SNPs_10	Random_Loci	Methyl27_Loci	UCSC_RefGene_Name	UCSC_RefGene_Accession	UCSC_RefGene_Group	UCSC_CpG_Islands_Name	Relation_to_UCSC_CpG_Island	Phantom	DMR	Enhancer	HMM_Island	Regulatory_Feature_Name	Regulatory_Feature_Group	DHS	DNAm_Chr_hg38	DNAm_Pos_hg38	DNAm_Strand_hg38	DNAm_GeneSymbol	Tx	Tx_Chr	Tx_Start	Tx_Gene	Is_Cis	RSq	Fx
cg00022866	-0.0141501	0.00485942	-2.91189	0.00359253	-0.0246623	0.00516092	-4.77866	1.76467e-06	-0.0190902	0.00353792	-5.39588	6.8189e-08	0.33301	-0.0190902	0.00353792	3.27361e-06	37	11	64108440	11	63865016	F			NA	TRUE	CCDC88B	NM_032251	Body	chr11:64109822-64110228	N_Shore			NA	11:63864757-63865127	11:64106983-64111798	Promoter_Associated	NA	11	64340967	+	CCDC88B	ENSG00000236935.1	11	64325050	AP003774.4	1	0.0158541	0.84559
cg00022866	-0.0141501	0.00485942	-2.91189	0.00359253	-0.0246623	0.00516092	-4.77866	1.76467e-06	-0.0190902	0.00353792	-5.39588	6.8189e-08	0.33301	-0.0190902	0.00353792	3.27361e-06	37	11	64108440	11	63865016	F			NA	TRUE	CCDC88B	NM_032251	Body	chr11:64109822-64110228	N_Shore			NA	11:63864757-63865127	11:64106983-64111798	Promoter_Associated	NA	11	64340967	+	CCDC88B	ENSG00000162302.13	11	64359148	RPS6KA4	1	0.0140646	-0.448784
cg00022866	-0.0141501	0.00485942	-2.91189	0.00359253	-0.0246623	0.00516092	-4.77866	1.76467e-06	-0.0190902	0.00353792	-5.39588	6.8189e-08	0.33301	-0.0190902	0.00353792	3.27361e-06	37	11	64108440	11	63865016	F			NA	TRUE	CCDC88B	NM_032251	Body	chr11:64109822-64110228	N_Shore			NA	11:63864757-63865127	11:64106983-64111798	Promoter_Associated	NA	11	64340967	+	CCDC88B	ENSG00000231680.1	11	64394342	AP003774.3	1	0.0480504	-1.58267
cg00025211	-0.0110189	0.00248999	-4.42526	9.63266e-06	-0.0102079	0.00205384	-4.97014	6.69043e-07	-0.0105362	0.00158441	-6.64997	2.93154e-11	0.96893	-0.0105362	0.00158441	2.73572e-09	37	1	145588627	1	144299984	R			NA	NA	NUDT17	NM_001012758	Body	chr1:145589135-145589535	N_Shore			TRUE		1:145588157-145589967	Promoter_Associated	NA	1	145846439	-	NUDT17	ENSG00000186364.12	1	145845630	NUDT17	1	0.0137394	-1.44702
cg00025211	-0.0110189	0.00248999	-4.42526	9.63266e-06	-0.0102079	0.00205384	-4.97014	6.69043e-07	-0.0105362	0.00158441	-6.64997	2.93154e-11	0.96893	-0.0105362	0.00158441	2.73572e-09	37	1	145588627	1	144299984	R			NA	NA	NUDT17	NM_001012758	Body	chr1:145589135-145589535	N_Shore			TRUE		1:145588157-145589967	Promoter_Associated	NA	1	145846439	-	NUDT17	ENSG00000198483.13	1	145866560	ANKRD35	1	0.0277167	-2.97086
cg00026474	-0.00536464	0.00286793	-1.87056	0.0614063	-0.0170251	0.00247582	-6.87655	6.13196e-12	-0.0120459	0.00187409	-6.4276	1.29633e-10	0.00877429	-0.0120459	0.00187409	1.07325e-08	37	8	134585500	8	134654682	F	rs2922465		NA	NA	ST3GAL1;ST3GAL1	NM_173344;NM_003033	TSS1500;TSS1500	chr8:134581969-134584875	S_Shore			NA				NA	8	133573256	+	ST3GAL1	ENSG00000261220.2	8	133573183	AC103706.1	1	0.0809714	-2.88316
cg00054774	-0.0138147	0.00400041	-3.45331	0.000553753	-0.02028	0.00406448	-4.98956	6.05164e-07	-0.016996	0.0028511	-5.96119	2.50402e-09	0.525913	-0.016996	0.0028511	1.6078e-07	37	21	43373079	21	42246148	F			NA	NA	C2CD2	NM_015500	Body	chr21:43373135-43374062	N_Shore			NA		21:43372665-43373338	Unclassified_Cell_type_specific	NA	21	41952969	+	C2CD2	ENSG00000184385.2	21	42102134	UMODL1-AS1	1	0.0200329	-1.71137
cg00065048	-0.00789077	0.00292112	-2.70128	0.00690727	-0.0193808	0.00287491	-6.74135	1.56923e-11	-0.0137274	0.00204901	-6.69951	2.09121e-11	0.0196508	-0.0137274	0.00204901	2.01353e-09	37	1	27962037	1	27834624	F			NA	NA	FGR	NM_005248	TSS1500	chr1:27960567-27961023	S_Shore			NA				NA	1	27635525	+	FGR	ENSG00000158161.16	1	27970344	EYA3	1	0.0413082	1.63908
cg00065048	-0.00789077	0.00292112	-2.70128	0.00690727	-0.0193808	0.00287491	-6.74135	1.56923e-11	-0.0137274	0.00204901	-6.69951	2.09121e-11	0.0196508	-0.0137274	0.00204901	2.01353e-09	37	1	27962037	1	27834624	F			NA	NA	FGR	NM_005248	TSS1500	chr1:27960567-27961023	S_Shore			NA				NA	1	27635525	+	FGR	ENSG00000174950.11	1	27379176	CD164L2	1	0.0496124	1.1715
cg00086577	-0.0131588	0.00299926	-4.38736	1.14734e-05	-0.017468	0.00296085	-5.89966	3.64254e-09	-0.0153412	0.00210709	-7.28076	3.31941e-13	0.592908	-0.0153412	0.00210709	4.48952e-11	37	6	32122894	6	32230872	F	rs62402749		NA	NA	PPT2;PPT2	NM_005155;NM_138717	Body;Body	chr6:32121829-32122529	S_Shore		RDMR	NA		6:32120376-32123743	Promoter_Associated	NA	6	32155116	+	PPT2	ENSG00000198502.6	6	32517353	HLA-DRB5	1	0.02697	-7.13661
cg00109344	-0.0122455	0.00246023	-4.97737	6.44548e-07	-0.0186929	0.00232488	-8.04037	8.95692e-16	-0.0156514	0.00168976	-9.26249	1.99717e-20	0.163004	-0.0156514	0.00168976	9.35411e-18	37	9	116344532	9	115384353	R			NA	NA	RGS3;RGS3;RGS3;RGS3	NM_130795;NM_021106;NM_144488;NM_134427	Body;5'UTR;Body;5'UTR	chr9:116346400-116346603	N_Shore			NA		9:116343993-116345494	Promoter_Associated	NA	9	113582251	-	RGS3	ENSG00000138835.22	9	113444731	RGS3	1	0.0281109	-2.02988
cg00119073	-0.0128991	0.00423111	-3.04864	0.00229881	-0.020895	0.00397518	-5.25636	1.46931e-07	-0.0171462	0.00289713	-5.91833	3.25224e-09	0.387339	-0.0171462	0.00289713	2.04403e-07	37	3	187870713	3	189353407	R			NA	NA	LPP	NM_001167672	TSS1500	chr3:187871478-187872354	N_Shore		RDMR	NA				NA	3	188152924	-	LPP	ENSG00000145012.13	3	188153284	LPP	1	0.0389295	0.782263
cg00123478	-0.011231	0.0042911	-2.61728	0.00886341	-0.0232312	0.00426777	-5.44339	5.2275e-08	-0.0172638	0.00302599	-5.70518	1.1622e-08	0.140044	-0.0172638	0.00302599	6.55023e-07	37	4	10458165	4	10067263	F			NA	NA	ZNF518B	NM_053042	5'UTR	chr4:10458129-10459353	Island			NA	4:10067138-10068870			NA	4	10456540	+	ZNF518B	ENSG00000178163.8	4	10439880	ZNF518B	1	0.0400954	-0.962983
cg00129811	-0.00842677	0.00441983	-1.90658	0.056575	-0.0269816	0.00451628	-5.9743	2.31079e-09	-0.017504	0.00315884	-5.54126	3.00305e-08	0.0134217	-0.017504	0.00315884	1.55121e-06	37	6	116726398	6	116833091	R			NA	NA	DSE;DSE	NM_013352;NM_001080976	Body;Body					TRUE		6:116726329-116726522	Unclassified_Cell_type_specific	NA	6	116405234	-	DSE	ENSG00000111817.17	6	116254173	DSE	1	0.0450684	-0.961318
cg00143376	-0.0186071	0.00285101	-6.5265	6.73257e-11	-0.0262459	0.0031081	-8.44436	3.05721e-17	-0.0220976	0.00210099	-10.5177	7.15977e-26	0.193954	-0.0220976	0.00210099	8.2193e-23	37	2	232394702	2	232102946	R			NA	TRUE	NMUR1	NM_006056	Body	chr2:232394763-232395337	N_Shore			NA				NA	2	231529990	-	NMUR1	ENSG00000171596.7	2	231523187	NMUR1	1	0.0290552	-3.33991
cg00157359	-0.00686477	0.00458466	-1.49733	0.134307	-0.032432	0.00475767	-6.81678	9.31053e-12	-0.0191751	0.00330131	-5.80831	6.31052e-09	0.000560334	-0.0191751	0.00330131	3.75126e-07	37	11	66233183	11	65989759	F			NA	NA	PELI3;PELI3	NM_145065;NM_001098510	TSS1500;TSS1500	chr11:66233899-66234964	N_Shore			NA				NA	11	66465711	+	PELI3	ENSG00000173992.9	11	66593153	CCS	1	0.020671	-0.520886
cg00178850	-0.0148721	0.00375401	-3.96166	7.44298e-05	-0.0167017	0.00355012	-4.70453	2.54452e-06	-0.0158379	0.00257938	-6.14019	8.24206e-10	0.939234	-0.0158379	0.00257938	5.84673e-08	37	1	236559675	1	234626298	F			NA	NA	EDARADD;EDARADD	NM_080738;NM_145861	Body;Body	chr1:236558459-236559336	S_Shore			NA	1:234626233-234626299			NA	1	236396374	+	EDARADD	ENSG00000186197.14	1	236348257	EDARADD	1	0.0137335	-1.03129
cg00179921	-0.00837002	0.00244902	-3.4177	0.000631529	-0.0137697	0.00241565	-5.70022	1.19656e-08	-0.0111069	0.0017198	-6.45826	1.05914e-10	0.291707	-0.0111069	0.0017198	8.91963e-09	37	22	39927437	22	38257383	R			NA	NA	RPS19BP1	NM_194326	Body	chr22:39928303-39929071	N_Shore			NA		22:39927309-39929400	Promoter_Associated	NA	22	39531431	-	RPS19BP1	ENSG00000128272.14	22	39519695	ATF4	1	0.0215823	-0.831786
cg00205605	-0.0167796	0.00291754	-5.7513	8.85616e-09	-0.013155	0.0032666	-4.02714	5.64596e-05	-0.0151713	0.00217599	-6.97212	3.1221e-12	0.71004	-0.0151713	0.00217599	3.52775e-10	37	1	2516401	1	2506261	R			NA	NA				chr1:2517397-2518892	N_Shore			TRUE		1:2516313-2516563	Promoter_Associated_Cell_type_specific	NA	1	2584961	-		ENSG00000157870.16	1	2586491	PRXL2B	1	0.0810001	-1.69174
cg00205605	-0.0167796	0.00291754	-5.7513	8.85616e-09	-0.013155	0.0032666	-4.02714	5.64596e-05	-0.0151713	0.00217599	-6.97212	3.1221e-12	0.71004	-0.0151713	0.00217599	3.52775e-10	37	1	2516401	1	2506261	R			NA	NA				chr1:2517397-2518892	N_Shore			TRUE		1:2516313-2516563	Promoter_Associated_Cell_type_specific	NA	1	2584961	-		ENSG00000215912.12	1	2635976	TTC34	1	0.0243625	1.52662
cg00205605	-0.0167796	0.00291754	-5.7513	8.85616e-09	-0.013155	0.0032666	-4.02714	5.64596e-05	-0.0151713	0.00217599	-6.97212	3.1221e-12	0.71004	-0.0151713	0.00217599	3.52775e-10	37	1	2516401	1	2506261	R			NA	NA				chr1:2517397-2518892	N_Shore			TRUE		1:2516313-2516563	Promoter_Associated_Cell_type_specific	NA	1	2584961	-		ENSG00000142606.16	1	2590639	MMEL1	1	0.0901515	-2.91407
cg00218406	-0.0283176	0.00611912	-4.62772	3.69719e-06	-0.0325165	0.00647741	-5.01999	5.16743e-07	-0.0302977	0.00444814	-6.81131	9.67108e-12	0.894915	-0.0302977	0.00444814	9.91866e-10	37	6	31431407	6	31539386	R		rs11557308	NA	NA	HCP5	NM_006674	3'UTR				DMR	NA		6:31430369-31431494	Promoter_Associated	NA	6	31463629	-	HCP5	ENSG00000234745.11	6	31269491	HLA-B	1	0.0368712	-0.500716
cg00218406	-0.0283176	0.00611912	-4.62772	3.69719e-06	-0.0325165	0.00647741	-5.01999	5.16743e-07	-0.0302977	0.00444814	-6.81131	9.67108e-12	0.894915	-0.0302977	0.00444814	9.91866e-10	37	6	31431407	6	31539386	R		rs11557308	NA	NA	HCP5	NM_006674	3'UTR				DMR	NA		6:31430369-31431494	Promoter_Associated	NA	6	31463629	-	HCP5	ENSG00000204525.16	6	31268749	HLA-C	1	0.0149173	-0.491953
cg00218406	-0.0283176	0.00611912	-4.62772	3.69719e-06	-0.0325165	0.00647741	-5.01999	5.16743e-07	-0.0302977	0.00444814	-6.81131	9.67108e-12	0.894915	-0.0302977	0.00444814	9.91866e-10	37	6	31431407	6	31539386	R		rs11557308	NA	NA	HCP5	NM_006674	3'UTR				DMR	NA		6:31430369-31431494	Promoter_Associated	NA	6	31463629	-	HCP5	ENSG00000166278.15	6	31897785	C2	1	0.0254504	-1.21146
cg00218406	-0.0283176	0.00611912	-4.62772	3.69719e-06	-0.0325165	0.00647741	-5.01999	5.16743e-07	-0.0302977	0.00444814	-6.81131	9.67108e-12	0.894915	-0.0302977	0.00444814	9.91866e-10	37	6	31431407	6	31539386	R		rs11557308	NA	NA	HCP5	NM_006674	3'UTR				DMR	NA		6:31430369-31431494	Promoter_Associated	NA	6	31463629	-	HCP5	ENSG00000243649.8	6	31945650	CFB	1	0.0207237	-0.396909
cg00218406	-0.0283176	0.00611912	-4.62772	3.69719e-06	-0.0325165	0.00647741	-5.01999	5.16743e-07	-0.0302977	0.00444814	-6.81131	9.67108e-12	0.894915	-0.0302977	0.00444814	9.91866e-10	37	6	31431407	6	31539386	R		rs11557308	NA	NA	HCP5	NM_006674	3'UTR				DMR	NA		6:31430369-31431494	Promoter_Associated	NA	6	31463629	-	HCP5	ENSG00000206337.10	6	31400702	HCP5	1	0.107647	-0.964675
cg00222799	-0.00743387	0.00359717	-2.06659	0.0387727	-0.0205662	0.00354614	-5.7996	6.64728e-09	-0.0140938	0.00252535	-5.58095	2.39208e-08	0.0340617	-0.0140938	0.00252535	1.26077e-06	37	21	43655464	21	42528533	F			NA	NA	ABCG1;ABCG1;ABCG1;ABCG1;ABCG1;ABCG1	NM_207628;NM_004915;NM_207174;NM_207627;NM_016818;NM_207629	Body;Body;Body;Body;Body;Body	chr21:43654846-43655465	Island			NA	21:42527916-42528534			NA	21	42235353	+	ABCG1	ENSG00000160179.18	21	42199689	ABCG1	1	0.0318892	-2.86659
cg00225157	-0.0128091	0.00260669	-4.91392	8.92714e-07	-0.0116113	0.00252861	-4.59198	4.39061e-06	-0.012192	0.00181497	-6.71745	1.84931e-11	0.947064	-0.012192	0.00181497	1.79694e-09	37	6	33173038	6	33281016	F			NA	NA	HSD17B8	NM_014234	Body	chr6:33172289-33172823	S_Shore			NA		6:33171945-33173651	Promoter_Associated	NA	6	33205260	+	HSD17B8	ENSG00000204228.4	6	33204655	HSD17B8	1	0.0231383	-1.37727
cg00232500	-0.020224	0.00365987	-5.52589	3.27819e-08	-0.0231467	0.00344551	-6.71792	1.84339e-11	-0.0217734	0.0025087	-8.67916	3.98704e-18	0.844478	-0.0217734	0.0025087	1.25063e-15	37	9	14910689	9	14900689	R			NA	NA	FREM1	NM_144966	TSS1500					NA				NA	9	14910690	-	FREM1	ENSG00000164946.19	9	14734666	FREM1	1	0.0307856	-0.741614
cg00241281	-0.0305945	0.00353674	-8.65049	5.12805e-18	-0.0220843	0.00326407	-6.76586	1.32519e-11	-0.0259987	0.00239866	-10.8389	2.25246e-27	0.209425	-0.0259987	0.00239866	3.27871e-24	37	14	105779794	14	104850839	R			NA	NA	PACS2;PACS2	NM_015197;NM_001100913	TSS1500;TSS1500	chr14:105780339-105782027	N_Shore			NA	14:104850839-104851060			NA	14	105313456	-	PACS2	ENSG00000184887.13	14	105248490	BTBD6	1	0.0138703	0.63588
cg00244776	-0.0246528	0.00400782	-6.15119	7.69056e-10	-0.0241441	0.00357371	-6.75603	1.41822e-11	-0.0243694	0.00266732	-9.13631	6.46223e-20	0.995522	-0.0243694	0.00266732	2.78105e-17	37	6	30883192	6	30991171	F			NA	NA	VARS2;VARS2;VARS2	NM_020442;NM_001167733;NM_001167734	Body;5'UTR;Body	chr6:30881533-30882296	S_Shore			TRUE		6:30883023-30883686	Promoter_Associated	NA	6	30915414	+	VARS2	ENSG00000204580.13	6	30876421	DDR1	1	0.014844	-1.19583
cg00244776	-0.0246528	0.00400782	-6.15119	7.69056e-10	-0.0241441	0.00357371	-6.75603	1.41822e-11	-0.0243694	0.00266732	-9.13631	6.46223e-20	0.995522	-0.0243694	0.00266732	2.78105e-17	37	6	30883192	6	30991171	F			NA	NA	VARS2;VARS2;VARS2	NM_020442;NM_001167733;NM_001167734	Body;5'UTR;Body	chr6:30881533-30882296	S_Shore			TRUE		6:30883023-30883686	Promoter_Associated	NA	6	30915414	+	VARS2	ENSG00000204536.14	6	31142439	CCHCR1	1	0.0172414	0.775192
cg00244776	-0.0246528	0.00400782	-6.15119	7.69056e-10	-0.0241441	0.00357371	-6.75603	1.41822e-11	-0.0243694	0.00266732	-9.13631	6.46223e-20	0.995522	-0.0243694	0.00266732	2.78105e-17	37	6	30883192	6	30991171	F			NA	NA	VARS2;VARS2;VARS2	NM_020442;NM_001167733;NM_001167734	Body;5'UTR;Body	chr6:30881533-30882296	S_Shore			TRUE		6:30883023-30883686	Promoter_Associated	NA	6	30915414	+	VARS2	ENSG00000137411.17	6	30908242	VARS2	1	0.216526	-3.26744
cg00244776	-0.0246528	0.00400782	-6.15119	7.69056e-10	-0.0241441	0.00357371	-6.75603	1.41822e-11	-0.0243694	0.00266732	-9.13631	6.46223e-20	0.995522	-0.0243694	0.00266732	2.78105e-17	37	6	30883192	6	30991171	F			NA	NA	VARS2;VARS2;VARS2	NM_020442;NM_001167733;NM_001167734	Body;5'UTR;Body	chr6:30881533-30882296	S_Shore			TRUE		6:30883023-30883686	Promoter_Associated	NA	6	30915414	+	VARS2	ENSG00000204528.3	6	31173735	PSORS1C3	1	0.0331871	-0.948972
cg00244776	-0.0246528	0.00400782	-6.15119	7.69056e-10	-0.0241441	0.00357371	-6.75603	1.41822e-11	-0.0243694	0.00266732	-9.13631	6.46223e-20	0.995522	-0.0243694	0.00266732	2.78105e-17	37	6	30883192	6	30991171	F			NA	NA	VARS2;VARS2;VARS2	NM_020442;NM_001167733;NM_001167734	Body;5'UTR;Body	chr6:30881533-30882296	S_Shore			TRUE		6:30883023-30883686	Promoter_Associated	NA	6	30915414	+	VARS2	ENSG00000277402.1	6	31355224	MIR6891	1	0.0157794	-0.124383
cg00244776	-0.0246528	0.00400782	-6.15119	7.69056e-10	-0.0241441	0.00357371	-6.75603	1.41822e-11	-0.0243694	0.00266732	-9.13631	6.46223e-20	0.995522	-0.0243694	0.00266732	2.78105e-17	37	6	30883192	6	30991171	F			NA	NA	VARS2;VARS2;VARS2	NM_020442;NM_001167733;NM_001167734	Body;5'UTR;Body	chr6:30881533-30882296	S_Shore			TRUE		6:30883023-30883686	Promoter_Associated	NA	6	30915414	+	VARS2	ENSG00000204525.16	6	31268749	HLA-C	1	0.0156766	1.11365
cg00244776	-0.0246528	0.00400782	-6.15119	7.69056e-10	-0.0241441	0.00357371	-6.75603	1.41822e-11	-0.0243694	0.00266732	-9.13631	6.46223e-20	0.995522	-0.0243694	0.00266732	2.78105e-17	37	6	30883192	6	30991171	F			NA	NA	VARS2;VARS2;VARS2	NM_020442;NM_001167733;NM_001167734	Body;5'UTR;Body	chr6:30881533-30882296	S_Shore			TRUE		6:30883023-30883686	Promoter_Associated	NA	6	30915414	+	VARS2	ENSG00000137310.12	6	31158547	TCF19	1	0.0151201	-0.989637
cg00244776	-0.0246528	0.00400782	-6.15119	7.69056e-10	-0.0241441	0.00357371	-6.75603	1.41822e-11	-0.0243694	0.00266732	-9.13631	6.46223e-20	0.995522	-0.0243694	0.00266732	2.78105e-17	37	6	30883192	6	30991171	F			NA	NA	VARS2;VARS2;VARS2	NM_020442;NM_001167733;NM_001167734	Body;5'UTR;Body	chr6:30881533-30882296	S_Shore			TRUE		6:30883023-30883686	Promoter_Associated	NA	6	30915414	+	VARS2	ENSG00000196260.5	6	30931353	SFTA2	1	0.0263314	-0.13633
cg00244776	-0.0246528	0.00400782	-6.15119	7.69056e-10	-0.0241441	0.00357371	-6.75603	1.41822e-11	-0.0243694	0.00266732	-9.13631	6.46223e-20	0.995522	-0.0243694	0.00266732	2.78105e-17	37	6	30883192	6	30991171	F			NA	NA	VARS2;VARS2;VARS2	NM_020442;NM_001167733;NM_001167734	Body;5'UTR;Body	chr6:30881533-30882296	S_Shore			TRUE		6:30883023-30883686	Promoter_Associated	NA	6	30915414	+	VARS2	ENSG00000204531.18	6	31164337	POU5F1	1	0.0161127	-1.29952
cg00256485	0.0167723	0.00210193	7.9795	1.46932e-15	0.0123081	0.0027212	4.52302	6.09642e-06	0.0151041	0.00166347	9.07989	1.08686e-19	0.430486	0.0151041	0.00166347	4.49081e-17	37	5	1494980	5	1547980	F			NA	NA	LPCAT1	NM_024830	Body	chr5:1494853-1495287	Island	high-CpG:1547978-1548032		NA	5:1547887-1548318	5:1494867-1495821	Unclassified	NA	5	1494864	+	LPCAT1	ENSG00000153395.10	5	1456480	LPCAT1	1	0.0296928	-1.86996
cg00283986	-0.0148478	0.00346437	-4.28584	1.82048e-05	-0.0117123	0.002983	-3.92636	8.62426e-05	-0.0130472	0.00226049	-5.77186	7.84027e-09	0.79042	-0.0130472	0.00226049	4.56974e-07	37	2	20875062	2	20738543	F			NA	NA				chr2:20870006-20871280	S_Shelf			TRUE		2:20874907-20875458	Unclassified_Cell_type_specific	TRUE	2	20675301	+		ENSG00000143869.7	2	20667144	GDF7	1	0.0362311	3.62404
cg00285394	-0.0175222	0.00478941	-3.65852	0.000253675	-0.0268324	0.00612652	-4.37972	1.18833e-05	-0.0210537	0.00377326	-5.57972	2.40899e-08	0.488365	-0.0210537	0.00377326	1.26878e-06	37	8	126011954	8	126081135	F		rs73704507	NA	NA	SQLE	NM_003129	Body	chr8:126010436-126011194	S_Shore		CDMR	NA		8:126009738-126012167	Promoter_Associated	NA	8	124999711	+	SQLE	ENSG00000104549.12	8	124998497	SQLE	1	0.0248	-0.803233
cg00288957	-0.0237424	0.00357	-6.65055	2.92003e-11	-0.0323657	0.0034992	-9.24947	2.25605e-20	-0.0281404	0.00249896	-11.2609	2.04768e-29	0.225855	-0.0281404	0.00249896	4.28203e-26	37	15	65203541	15	62990594	R			NA	NA	ANKDD1A	NM_182703	TSS1500	chr15:65203730-65204392	N_Shore			NA				TRUE	15	64911341	-	ANKDD1A	ENSG00000241839.10	15	64841883	PLEKHO2	1	0.0262035	0.684346
cg00288957	-0.0237424	0.00357	-6.65055	2.92003e-11	-0.0323657	0.0034992	-9.24947	2.25605e-20	-0.0281404	0.00249896	-11.2609	2.04768e-29	0.225855	-0.0281404	0.00249896	4.28203e-26	37	15	65203541	15	62990594	R			NA	NA	ANKDD1A	NM_182703	TSS1500	chr15:65203730-65204392	N_Shore			NA				TRUE	15	64911341	-	ANKDD1A	ENSG00000166839.17	15	64911902	ANKDD1A	1	0.0783818	4.72249
cg00290483	-0.0149039	0.00338091	-4.40824	1.04214e-05	-0.0231743	0.00350721	-6.60762	3.90554e-11	-0.0188875	0.00243409	-7.75957	8.52203e-15	0.236653	-0.0188875	0.00243409	1.5269e-12	37	17	71639029	17	69150624	R			NA	NA	SDK2	NM_001144952	Body	chr17:71639028-71641670	Island			NA	17:69150624-69153694			NA	17	73642889	-	SDK2	ENSG00000069188.17	17	73334384	SDK2	1	0.0317768	3.07106
cg00300969	-0.0142417	0.00284968	-4.99766	5.80293e-07	-0.0164331	0.00246558	-6.665	2.64662e-11	-0.0154949	0.00186455	-8.31028	9.54788e-17	0.844433	-0.0154949	0.00186455	2.37321e-14	37	20	31366486	20	30830147	F			NA	NA	DNMT3B;DNMT3B;DNMT3B;DNMT3B	NM_175849;NM_006892;NM_175850;NM_175848	5'UTR;5'UTR;TSS1500;5'UTR					NA		20:31365642-31367246	Unclassified	TRUE	20	32778679	+	DNMT3B	ENSG00000101367.9	20	32819954	MAPRE1	1	0.0205056	0.872158
cg00317879	-0.0072703	0.00354045	-2.0535	0.0400245	-0.0170252	0.00274254	-6.20781	5.37273e-10	-0.0133669	0.00216814	-6.16516	7.04106e-10	0.0932686	-0.0133669	0.00216814	5.06331e-08	37	11	68920611	11	68677187	F		rs73522322	NA	NA								TRUE	11:68677187-68677266			NA	11	69153142	+		ENSG00000284713.1	11	69155478	SMIM38	1	0.0528276	3.14822
cg00317879	-0.0072703	0.00354045	-2.0535	0.0400245	-0.0170252	0.00274254	-6.20781	5.37273e-10	-0.0133669	0.00216814	-6.16516	7.04106e-10	0.0932686	-0.0133669	0.00216814	5.06331e-08	37	11	68920611	11	68677187	F		rs73522322	NA	NA								TRUE	11:68677187-68677266			NA	11	69153142	+		ENSG00000260895.1	11	69103493	AP003071.1	1	0.0153796	0.28219
cg00328058	-0.0170106	0.00330674	-5.14422	2.68639e-07	-0.0176226	0.0029267	-6.02133	1.72995e-09	-0.0173538	0.00219159	-7.91834	2.40702e-15	0.990441	-0.0173538	0.00219159	4.73974e-13	37	1	901062	1	890925	F			NA	NA	PLEKHN1;KLHL17;PLEKHN1	NM_001160184;NM_198317;NM_032129	TSS1500;3'UTR;TSS1500	chr1:894313-902654	Island			NA	1:890608-890926			NA	1	965681	+	PLEKHN1;KLHL17	ENSG00000188976.11	1	944203	NOC2L	1	0.0165265	0.715464
cg00338002	-0.00703397	0.00291341	-2.41434	0.0157638	-0.0176076	0.00311416	-5.65403	1.56726e-08	-0.011969	0.00212753	-5.62579	1.84665e-08	0.0462436	-0.011969	0.00212753	9.98826e-07	37	1	28198813	1	28071400	R			NA	NA	C1orf38;C1orf38;C1orf38	NM_001105556;NM_004848;NM_001039477	TSS1500;TSS1500;TSS1500	chr1:28199031-28199257	N_Shore			NA		1:28198541-28200383	Promoter_Associated	TRUE	1	27872301	-	C1orf38	ENSG00000130775.16	1	27872543	THEMIS2	1	0.0153112	-0.736692
cg00338002	-0.00703397	0.00291341	-2.41434	0.0157638	-0.0176076	0.00311416	-5.65403	1.56726e-08	-0.011969	0.00212753	-5.62579	1.84665e-08	0.0462436	-0.011969	0.00212753	9.98826e-07	37	1	28198813	1	28071400	R			NA	NA	C1orf38;C1orf38;C1orf38	NM_001105556;NM_004848;NM_001039477	TSS1500;TSS1500;TSS1500	chr1:28199031-28199257	N_Shore			NA		1:28198541-28200383	Promoter_Associated	TRUE	1	27872301	-	C1orf38	ENSG00000130768.15	1	27935000	SMPDL3B	1	0.0323915	-2.18677
cg00340855	-0.0208351	0.00421043	-4.94845	7.48072e-07	-0.0192069	0.00389113	-4.93608	7.97095e-07	-0.0199569	0.00285767	-6.98365	2.8761e-12	0.960475	-0.0199569	0.00285767	3.27137e-10	37	6	30458586	6	30566565	F		rs77275906	NA	NA	HLA-E	NM_005516	Body	chr6:30457369-30458175	S_Shore			NA				NA	6	30490808	+	HLA-E	ENSG00000204592.9	6	30489509	HLA-E	1	0.0302386	-0.70258
cg00346376	-0.00694938	0.00234422	-2.96448	0.00303196	-0.0112988	0.00241689	-4.67492	2.94063e-06	-0.0090577	0.00168272	-5.38279	7.33421e-08	0.434163	-0.0090577	0.00168272	3.49763e-06	37	5	1110089	5	1163089	R			NA	NA	SLC12A7	NM_006598	Body	chr5:1111396-1112388	N_Shore			NA				NA	5	1109973	-	SLC12A7	ENSG00000113504.21	5	1050384	SLC12A7	1	0.129873	-10.6424
cg00347798	-0.0389373	0.00872718	-4.46161	8.13474e-06	-0.0393194	0.0103405	-3.80246	0.000143264	-0.0390962	0.00666935	-5.86207	4.5713e-09	0.999601	-0.0390962	0.00666935	2.79498e-07	37	3	45077649	3	45052653	R			NA	NA				chr3:45077069-45077690	Island			TRUE	3:45052096-45052775	3:45077441-45079749	Unclassified	NA	3	45036156	-		ENSG00000163812.14	3	44915257	ZDHHC3	1	0.0200537	0.153163
cg00347798	-0.0389373	0.00872718	-4.46161	8.13474e-06	-0.0393194	0.0103405	-3.80246	0.000143264	-0.0390962	0.00666935	-5.86207	4.5713e-09	0.999601	-0.0390962	0.00666935	2.79498e-07	37	3	45077649	3	45052653	R			NA	NA				chr3:45077069-45077690	Island			TRUE	3:45052096-45052775	3:45077441-45079749	Unclassified	NA	3	45036156	-		ENSG00000075914.13	3	44975241	EXOSC7	1	0.0180675	0.177263
cg00347798	-0.0389373	0.00872718	-4.46161	8.13474e-06	-0.0393194	0.0103405	-3.80246	0.000143264	-0.0390962	0.00666935	-5.86207	4.5713e-09	0.999601	-0.0390962	0.00666935	2.79498e-07	37	3	45077649	3	45052653	R			NA	NA				chr3:45077069-45077690	Island			TRUE	3:45052096-45052775	3:45077441-45079749	Unclassified	NA	3	45036156	-		ENSG00000163815.6	3	45001548	CLEC3B	1	0.0855732	0.720694
cg00348467	-0.0135209	0.00390299	-3.46423	0.000531753	-0.0296891	0.00439415	-6.75652	1.41349e-11	-0.0206513	0.0029181	-7.07696	1.47347e-12	0.0227317	-0.0206513	0.0029181	1.76903e-10	37	17	43222121	17	40577904	R			NA	NA				chr17:43221927-43222388	Island			TRUE	17:40577349-40578127	17:43221108-43222234	Unclassified	TRUE	17	45144753	-		ENSG00000204650.14	17	45620328	LINC02210	1	0.0200691	-0.912631
cg00348467	-0.0135209	0.00390299	-3.46423	0.000531753	-0.0296891	0.00439415	-6.75652	1.41349e-11	-0.0206513	0.0029181	-7.07696	1.47347e-12	0.0227317	-0.0206513	0.0029181	1.76903e-10	37	17	43222121	17	40577904	R			NA	NA				chr17:43221927-43222388	Island			TRUE	17:40577349-40578127	17:43221108-43222234	Unclassified	TRUE	17	45144753	-		ENSG00000214425.7	17	45506741	LRRC37A4P	1	0.0195251	2.48677
cg00348467	-0.0135209	0.00390299	-3.46423	0.000531753	-0.0296891	0.00439415	-6.75652	1.41349e-11	-0.0206513	0.0029181	-7.07696	1.47347e-12	0.0227317	-0.0206513	0.0029181	1.76903e-10	37	17	43222121	17	40577904	R			NA	NA				chr17:43221927-43222388	Island			TRUE	17:40577349-40578127	17:43221108-43222234	Unclassified	TRUE	17	45144753	-		ENSG00000172992.12	17	45023340	DCAKD	1	0.0166871	-0.44093
cg00348467	-0.0135209	0.00390299	-3.46423	0.000531753	-0.0296891	0.00439415	-6.75652	1.41349e-11	-0.0206513	0.0029181	-7.07696	1.47347e-12	0.0227317	-0.0206513	0.0029181	1.76903e-10	37	17	43222121	17	40577904	R			NA	NA				chr17:43221927-43222388	Island			TRUE	17:40577349-40578127	17:43221108-43222234	Unclassified	TRUE	17	45144753	-		ENSG00000263503.1	17	45600869	MAPK8IP1P2	1	0.0143073	-2.06794
cg00349404	-0.0072756	0.00471443	-1.54326	0.122767	-0.0290463	0.00376239	-7.72017	1.16177e-14	-0.0205756	0.00294072	-6.99679	2.61903e-12	0.00148281	-0.0205756	0.00294072	3.0035e-10	37	10	106100036	10	106090026	R			NA	NA				chr10:106097595-106098556	S_Shore			NA				NA	10	104340277	-		ENSG00000231233.1	10	104351591	CFAP58-DT	1	0.0137894	1.00929
cg00350448	-0.0111362	0.00243873	-4.56638	4.96222e-06	-0.0145074	0.00185225	-7.83227	4.79124e-15	-0.0132741	0.00147504	-8.99914	2.27498e-19	0.545568	-0.0132741	0.00147504	8.81145e-17	37	11	72433866	11	72111514	F			NA	NA	ARAP1;ARAP1;ARAP1	NM_001040118;NM_001135190;NM_015242	Body;TSS1500;TSS1500	chr11:72437676-72438005	N_Shelf			NA		11:72432591-72434003	Promoter_Associated	NA	11	72722820	+	ARAP1	ENSG00000214530.9	11	72754729	STARD10	1	0.0330205	-3.6482
cg00354484	-0.0146832	0.0026449	-5.5515	2.83236e-08	-0.00625227	0.00215273	-2.90435	0.00368022	-0.00961183	0.00166961	-5.75695	8.56494e-09	0.047078	-0.00961183	0.00166961	4.95323e-07	37	2	114007283	2	113723753	R			NA	NA	PAX8;PAX8;LOC654433;PAX8;PAX8;PAX8;LOC440839	NM_003466;NM_013951;NR_015377;NM_013953;NM_013992;NM_013952;NR_029399	Body;Body;Body;Body;Body;Body;Body					NA		2:114005955-114007506	Unclassified	NA	2	113249705	-	PAX8;LOC654433;LOC440839	ENSG00000189223.14	2	113211522	PAX8-AS1	1	0.0377427	14.9944
cg00354484	-0.0146832	0.0026449	-5.5515	2.83236e-08	-0.00625227	0.00215273	-2.90435	0.00368022	-0.00961183	0.00166961	-5.75695	8.56494e-09	0.047078	-0.00961183	0.00166961	4.95323e-07	37	2	114007283	2	113723753	R			NA	NA	PAX8;PAX8;LOC654433;PAX8;PAX8;PAX8;LOC440839	NM_003466;NM_013951;NR_015377;NM_013953;NM_013992;NM_013952;NR_029399	Body;Body;Body;Body;Body;Body;Body					NA		2:114005955-114007506	Unclassified	NA	2	113249705	-	PAX8;LOC654433;LOC440839	ENSG00000125618.17	2	113215997	PAX8	1	0.0439291	6.36096
cg00394658	-0.00769802	0.00265723	-2.89701	0.00376741	-0.0150548	0.0029001	-5.19114	2.09005e-07	-0.0110555	0.00195919	-5.64291	1.67202e-08	0.173928	-0.0110555	0.00195919	9.13579e-07	37	11	48001669	11	47958245	R			NA	TRUE	PTPRJ;PTPRJ	NM_001098503;NM_002843	TSS1500;TSS1500	chr11:48001604-48003170	Island			NA	11:47957969-47959746			NA	11	47980116	-	PTPRJ	ENSG00000149177.13	11	47980558	PTPRJ	1	0.01526	0.933714
cg00415704	-0.0137433	0.00285321	-4.81679	1.45885e-06	-0.0140332	0.00263857	-5.3185	1.04628e-07	-0.0138996	0.00193719	-7.17512	7.22446e-13	0.997222	-0.0138996	0.00193719	9.2098e-11	37	15	93630536	15	91431540	R			NA	NA	RGMA;RGMA	NM_020211;NM_001166287	Body;5'UTR	chr15:93631428-93633173	N_Shore		RDMR	NA				NA	15	93087306	-	RGMA	ENSG00000182175.14	15	93035273	RGMA	1	0.0161555	1.26219
cg00417151	-0.00969987	0.00264691	-3.66461	0.000247719	-0.0111842	0.00264484	-4.22868	2.35069e-05	-0.0104426	0.00187092	-5.58155	2.38384e-08	0.924338	-0.0104426	0.00187092	1.25672e-06	37	20	17598356	20	17546356	R			NA	NA	RRBP1;RRBP1	NM_001042576;NM_004587	Body;Body	chr20:17595271-17595483	S_Shelf			NA		20:17597911-17599582	Unclassified	TRUE	20	17617710	-	RRBP1	ENSG00000125868.16	20	17570075	DSTN	1	0.0393273	-1.97674
cg00443307	-0.0148399	0.00409803	-3.62122	0.000293214	-0.0220675	0.00451469	-4.88794	1.01899e-06	-0.0181049	0.00303438	-5.96657	2.42287e-09	0.495306	-0.0181049	0.00303438	1.56006e-07	37	12	9141740	12	9033007	R			NA	TRUE	KLRG1	NM_005810	TSS1500					NA				NA	12	8989143	-	KLRG1	ENSG00000256427.2	12	9240406	AC010175.1	1	0.0146368	-0.971527
cg00443307	-0.0148399	0.00409803	-3.62122	0.000293214	-0.0220675	0.00451469	-4.88794	1.01899e-06	-0.0181049	0.00303438	-5.96657	2.42287e-09	0.495306	-0.0181049	0.00303438	1.56006e-07	37	12	9141740	12	9033007	R			NA	TRUE	KLRG1	NM_005810	TSS1500					NA				NA	12	8989143	-	KLRG1	ENSG00000139187.10	12	8950044	KLRG1	1	0.0290717	-1.60402
cg00456672	-0.0180446	0.00469904	-3.84006	0.000123004	-0.0294744	0.00462485	-6.37304	1.85322e-10	-0.0238504	0.00329618	-7.23577	4.62891e-13	0.222543	-0.0238504	0.00329618	6.10361e-11	37	15	62358751	15	60146043	F			NA	NA	C2CD4A	NM_207322	TSS1500	chr15:62359827-62360995	N_Shore			NA				NA	15	62066551	+	C2CD4A	ENSG00000129003.17	15	61852389	VPS13C	1	0.0242941	0.542033
cg00472373	-0.0150339	0.00416234	-3.61189	0.000303972	-0.0163288	0.00373668	-4.36986	1.24324e-05	-0.0157509	0.00278058	-5.66462	1.47354e-08	0.973562	-0.0157509	0.00278058	8.14296e-07	37	3	9833414	3	9808414	R			NA	NA	ARPC4;TADA3;ARPC4;ARPC4;TADA3	NM_001024960;NM_133480;NM_005718;NM_001024959;NM_006354	TSS1500;5'UTR;TSS1500;TSS1500;5'UTR	chr3:9833992-9834985	N_Shore			NA				NA	3	9791729	-	ARPC4;TADA3	ENSG00000214021.16	3	9808086	TTLL3	1	0.0152157	0.626558
cg00507154	-0.0167777	0.00387504	-4.32969	1.49322e-05	-0.0258175	0.00452616	-5.70407	1.16982e-08	-0.0206012	0.00294361	-6.99863	2.58482e-12	0.316356	-0.0206012	0.00294361	2.96963e-10	37	19	50192739	19	54884551	F			NA	NA	C19orf76;C19orf76	NM_001101340;NM_001101340	1stExon;5'UTR	chr19:50192499-50192802	Island			NA	19:54884382-54886673	19:50192245-50194371	Promoter_Associated	NA	19	49689481	+	C19orf76	ENSG00000169169.14	19	49690898	CPT1C	1	0.0208299	-0.667412
cg00507154	-0.0167777	0.00387504	-4.32969	1.49322e-05	-0.0258175	0.00452616	-5.70407	1.16982e-08	-0.0206012	0.00294361	-6.99863	2.58482e-12	0.316356	-0.0206012	0.00294361	2.96963e-10	37	19	50192739	19	54884551	F			NA	NA	C19orf76;C19orf76	NM_001101340;NM_001101340	1stExon;5'UTR	chr19:50192499-50192802	Island			NA	19:54884382-54886673	19:50192245-50194371	Promoter_Associated	NA	19	49689481	+	C19orf76	ENSG00000224420.3	19	49688664	ADM5	1	0.0776021	2.04312
cg00539049	-0.0156311	0.00345094	-4.5295	5.91232e-06	-0.0204624	0.00313588	-6.52524	6.78906e-11	-0.0182773	0.00232081	-7.87538	3.39703e-15	0.584631	-0.0182773	0.00232081	6.50795e-13	37	2	149933534	2	149641780	F			NA	NA	LYPD6B	NM_177964	5'UTR					TRUE				NA	2	149077019	+	LYPD6B	ENSG00000150556.17	2	149038107	LYPD6B	1	0.142019	-3.14329
cg00539174	0.0105845	0.00204455	5.17692	2.25584e-07	0.00793907	0.00203913	3.89335	9.8868e-05	0.00925826	0.0014438	6.41244	1.4321e-10	0.657282	0.00925826	0.0014438	1.17582e-08	37	20	57583434	20	57016829	R			NA	NA	CTSZ	NM_001336	TSS1500	chr20:57581902-57582595	S_Shore			NA		20:57583352-57583596	Unclassified_Cell_type_specific	NA	20	59008378	-	CTSZ	ENSG00000101160.14	20	58995185	CTSZ	1	0.0261521	-1.295
cg00556407	-0.00794092	0.00293287	-2.70756	0.00677792	-0.0105923	0.00228027	-4.64518	3.3978e-06	-0.00959338	0.00180019	-5.32909	9.87037e-08	0.775169	-0.00959338	0.00180019	4.57772e-06	37	8	95369439	8	95438615	R			NA	NA								TRUE		8:95368879-95370234	Unclassified	TRUE	8	94357210	-		ENSG00000197275.14	8	94371960	RAD54B	1	0.0193446	1.32769
cg00556407	-0.00794092	0.00293287	-2.70756	0.00677792	-0.0105923	0.00228027	-4.64518	3.3978e-06	-0.00959338	0.00180019	-5.32909	9.87037e-08	0.775169	-0.00959338	0.00180019	4.57772e-06	37	8	95369439	8	95438615	R			NA	NA								TRUE		8:95368879-95370234	Unclassified	TRUE	8	94357210	-		ENSG00000265817.3	8	94372170	FSBP	1	0.0236327	1.71372
cg00566982	-0.0194321	0.00345089	-5.63104	1.79124e-08	-0.00721261	0.00287632	-2.50758	0.0121561	-0.0122218	0.00220947	-5.53155	3.17414e-08	0.0247414	-0.0122218	0.00220947	1.63032e-06	37	11	6590092	11	6546668	R			NA	NA	DNHD1	NM_144666	Body	chr11:6591960-6592795	N_Shore			NA		11:6589971-6590126	Unclassified_Cell_type_specific	TRUE	11	6568861	-	DNHD1	ENSG00000254595.1	11	6488186	AC084337.1	1	0.0135551	0.530571
cg00574379	0.0235866	0.00451913	5.21928	1.79616e-07	0.0143179	0.00465127	3.07828	0.00208199	0.0190858	0.00324122	5.88847	3.89794e-09	0.36011	0.0190858	0.00324122	2.41812e-07	37	7	38344455	7	38310980	R			NA	NA								TRUE				NA	7	38304853	-		ENSG00000272908.1	7	38326070	AC006033.2	1	0.0625659	-1.89647
cg00574412	-0.0198933	0.00280545	-7.09094	1.33204e-12	-0.0192186	0.00284403	-6.75752	1.40378e-11	-0.0195605	0.00199725	-9.79372	1.19807e-22	0.98584	-0.0195605	0.00199725	7.77903e-20	37	17	27892866	17	24916992	F	rs61204293		NA	NA	ABHD15	NM_198147	Body	chr17:27893086-27896078	N_Shore		RDMR	NA				NA	17	29565847	+	ABHD15	ENSG00000168792.5	17	29560547	ABHD15	1	0.0287084	-1.13431
cg00582562	-0.0116885	0.00381823	-3.06123	0.00220427	-0.0125517	0.00212978	-5.89343	3.78253e-09	-0.0123469	0.00185999	-6.63813	3.17695e-11	0.980699	-0.0123469	0.00185999	2.94193e-09	37	17	46388465	17	43743464	R			NA	NA	SKAP1;SKAP1	NM_003726;NM_001075099	Body;Body					NA	17:43743386-43743485			NA	17	48311102	-	SKAP1	ENSG00000230148.8	17	48543551	HOXB-AS1	1	0.0136583	-2.02564
cg00582562	-0.0116885	0.00381823	-3.06123	0.00220427	-0.0125517	0.00212978	-5.89343	3.78253e-09	-0.0123469	0.00185999	-6.63813	3.17695e-11	0.980699	-0.0123469	0.00185999	2.94193e-09	37	17	46388465	17	43743464	R			NA	NA	SKAP1;SKAP1	NM_003726;NM_001075099	Body;Body					NA	17:43743386-43743485			NA	17	48311102	-	SKAP1	ENSG00000173917.10	17	48540894	HOXB2	1	0.0139461	-2.53692
cg00582562	-0.0116885	0.00381823	-3.06123	0.00220427	-0.0125517	0.00212978	-5.89343	3.78253e-09	-0.0123469	0.00185999	-6.63813	3.17695e-11	0.980699	-0.0123469	0.00185999	2.94193e-09	37	17	46388465	17	43743464	R			NA	NA	SKAP1;SKAP1	NM_003726;NM_001075099	Body;Body					NA	17:43743386-43743485			NA	17	48311102	-	SKAP1	ENSG00000108511.10	17	48595751	HOXB6	1	0.0142136	-0.362357
cg00620824	-0.0320031	0.00695907	-4.59876	4.25021e-06	-0.0257695	0.00776189	-3.32	0.000900171	-0.0292252	0.00518147	-5.64034	1.69717e-08	0.836291	-0.0292252	0.00518147	9.2573e-07	37	6	31240784	6	31348763	F	rs34622008	rs76759564	NA	NA	HLA-C	NM_002117	TSS1500	chr6:31238852-31240120	S_Shore			NA				NA	6	31273006	+	HLA-C	ENSG00000234745.11	6	31269491	HLA-B	1	0.0181028	-0.375192
cg00620824	-0.0320031	0.00695907	-4.59876	4.25021e-06	-0.0257695	0.00776189	-3.32	0.000900171	-0.0292252	0.00518147	-5.64034	1.69717e-08	0.836291	-0.0292252	0.00518147	9.2573e-07	37	6	31240784	6	31348763	F	rs34622008	rs76759564	NA	NA	HLA-C	NM_002117	TSS1500	chr6:31238852-31240120	S_Shore			NA				NA	6	31273006	+	HLA-C	ENSG00000204525.16	6	31268749	HLA-C	1	0.027756	-0.717611
cg00620824	-0.0320031	0.00695907	-4.59876	4.25021e-06	-0.0257695	0.00776189	-3.32	0.000900171	-0.0292252	0.00518147	-5.64034	1.69717e-08	0.836291	-0.0292252	0.00518147	9.2573e-07	37	6	31240784	6	31348763	F	rs34622008	rs76759564	NA	NA	HLA-C	NM_002117	TSS1500	chr6:31238852-31240120	S_Shore			NA				NA	6	31273006	+	HLA-C	ENSG00000204531.18	6	31164337	POU5F1	1	0.0257145	-0.795021
cg00620824	-0.0320031	0.00695907	-4.59876	4.25021e-06	-0.0257695	0.00776189	-3.32	0.000900171	-0.0292252	0.00518147	-5.64034	1.69717e-08	0.836291	-0.0292252	0.00518147	9.2573e-07	37	6	31240784	6	31348763	F	rs34622008	rs76759564	NA	NA	HLA-C	NM_002117	TSS1500	chr6:31238852-31240120	S_Shore			NA				NA	6	31273006	+	HLA-C	ENSG00000277402.1	6	31355224	MIR6891	1	0.0396806	-0.0955201
cg00620824	-0.0320031	0.00695907	-4.59876	4.25021e-06	-0.0257695	0.00776189	-3.32	0.000900171	-0.0292252	0.00518147	-5.64034	1.69717e-08	0.836291	-0.0292252	0.00518147	9.2573e-07	37	6	31240784	6	31348763	F	rs34622008	rs76759564	NA	NA	HLA-C	NM_002117	TSS1500	chr6:31238852-31240120	S_Shore			NA				NA	6	31273006	+	HLA-C	ENSG00000206337.10	6	31400702	HCP5	1	0.0206626	-0.451965
cg00620824	-0.0320031	0.00695907	-4.59876	4.25021e-06	-0.0257695	0.00776189	-3.32	0.000900171	-0.0292252	0.00518147	-5.64034	1.69717e-08	0.836291	-0.0292252	0.00518147	9.2573e-07	37	6	31240784	6	31348763	F	rs34622008	rs76759564	NA	NA	HLA-C	NM_002117	TSS1500	chr6:31238852-31240120	S_Shore			NA				NA	6	31273006	+	HLA-C	ENSG00000206344.7	6	31197760	HCG27	1	0.0507545	-0.984653
cg00620824	-0.0320031	0.00695907	-4.59876	4.25021e-06	-0.0257695	0.00776189	-3.32	0.000900171	-0.0292252	0.00518147	-5.64034	1.69717e-08	0.836291	-0.0292252	0.00518147	9.2573e-07	37	6	31240784	6	31348763	F	rs34622008	rs76759564	NA	NA	HLA-C	NM_002117	TSS1500	chr6:31238852-31240120	S_Shore			NA				NA	6	31273006	+	HLA-C	ENSG00000204528.3	6	31173735	PSORS1C3	1	0.0242484	-0.392826
cg00620824	-0.0320031	0.00695907	-4.59876	4.25021e-06	-0.0257695	0.00776189	-3.32	0.000900171	-0.0292252	0.00518147	-5.64034	1.69717e-08	0.836291	-0.0292252	0.00518147	9.2573e-07	37	6	31240784	6	31348763	F	rs34622008	rs76759564	NA	NA	HLA-C	NM_002117	TSS1500	chr6:31238852-31240120	S_Shore			NA				NA	6	31273006	+	HLA-C	ENSG00000137310.12	6	31158547	TCF19	1	0.0359897	-0.739397
cg00620824	-0.0320031	0.00695907	-4.59876	4.25021e-06	-0.0257695	0.00776189	-3.32	0.000900171	-0.0292252	0.00518147	-5.64034	1.69717e-08	0.836291	-0.0292252	0.00518147	9.2573e-07	37	6	31240784	6	31348763	F	rs34622008	rs76759564	NA	NA	HLA-C	NM_002117	TSS1500	chr6:31238852-31240120	S_Shore			NA				NA	6	31273006	+	HLA-C	ENSG00000204536.14	6	31142439	CCHCR1	1	0.0351555	-0.536055
cg00622166	-0.0106273	0.00289611	-3.6695	0.000243022	-0.0134079	0.00257597	-5.20498	1.94016e-07	-0.0121797	0.00192476	-6.32791	2.48506e-10	0.773112	-0.0121797	0.00192476	1.95667e-08	37	16	46919021	16	45476522	F			NA	NA	GPT2;GPT2	NM_133443;NM_001142466	Body;TSS200	chr16:46917849-46918957	S_Shore			NA	16:45475182-45476660			NA	16	46885108	+	GPT2	ENSG00000166123.14	16	46884362	GPT2	1	0.014194	-1.64858
cg00632560	-0.0218968	0.00281539	-7.77751	7.39632e-15	-0.0344792	0.00347759	-9.91469	3.59377e-23	-0.0268785	0.00218819	-12.2834	1.11172e-34	0.0191784	-0.0268785	0.00218819	5.56383e-31	37	20	62675267	20	62145711	F			NA	NA				chr20:62673792-62674131	S_Shore			NA		20:62675218-62675411	Unclassified_Cell_type_specific	NA	20	64043913	+		ENSG00000130590.14	20	63974116	SAMD10	1	0.0244088	1.46389
cg00632560	-0.0218968	0.00281539	-7.77751	7.39632e-15	-0.0344792	0.00347759	-9.91469	3.59377e-23	-0.0268785	0.00218819	-12.2834	1.11172e-34	0.0191784	-0.0268785	0.00218819	5.56383e-31	37	20	62675267	20	62145711	F			NA	NA				chr20:62673792-62674131	S_Shore			NA		20:62675218-62675411	Unclassified_Cell_type_specific	NA	20	64043913	+		ENSG00000196421.8	20	64034344	C20orf204	1	0.0288523	2.93461
cg00637795	-0.0169576	0.00327875	-5.17197	2.31635e-07	-0.0208417	0.00318439	-6.54495	5.95141e-11	-0.0189563	0.00228433	-8.29841	1.05517e-16	0.696926	-0.0189563	0.00228433	2.60816e-14	37	15	82553671	15	80340726	R			NA	NA	EFTUD1;FAM154B;EFTUD1	NM_001040610;NM_001008226;NM_024580	Body;TSS1500;Body	chr15:82554785-82555476	N_Shore			NA				NA	15	82261329	-	EFTUD1;FAM154B	ENSG00000188659.9	15	82262810	SAXO2	1	0.0299221	-1.48416
cg00646396	-0.018699	0.0033802	-5.53193	3.16724e-08	-0.0268276	0.00419054	-6.40194	1.53419e-10	-0.0219031	0.00263097	-8.32512	8.42453e-17	0.319903	-0.0219031	0.00263097	2.11524e-14	37	1	26482755	1	26355342	R			NA	NA								TRUE				NA	1	26156263	-		ENSG00000142684.9	1	26169908	ZNF593	1	0.0187292	1.00876
cg00675878	-0.00942375	0.00222051	-4.24396	2.19612e-05	-0.010463	0.0022307	-4.69045	2.72602e-06	-0.00994099	0.00157373	-6.31684	2.66961e-10	0.94695	-0.00994099	0.00157373	2.08906e-08	37	22	23521267	22	21851267	F			NA	NA	BCR;BCR	NM_021574;NM_004327	TSS1500;TSS1500	chr22:23522550-23524465	N_Shore			NA				NA	22	23179079	+	BCR	ENSG00000186716.20	22	23179704	BCR	1	0.0382986	-2.15594
cg00695112	-0.0138363	0.00311429	-4.44286	8.87711e-06	-0.0159681	0.0030745	-5.19372	2.06139e-07	-0.0149159	0.00218793	-6.81736	9.27289e-12	0.888126	-0.0149159	0.00218793	9.53442e-10	37	9	71862747	9	71052567	R			NA	NA	TJP2;TJP2;TJP2;TJP2;TJP2;TJP2	NM_001170414;NM_001170630;NM_001170415;NM_201629;NM_004817;NM_001170416	Body;Body;Body;Body;Body;Body	chr9:71862950-71863160	N_Shore			NA				NA	9	69247830	-	TJP2	ENSG00000119139.19	9	69121264	TJP2	1	0.0283194	2.79009
cg00723041	-0.00934415	0.00240376	-3.88731	0.000101362	-0.00847804	0.0021861	-3.87816	0.000105249	-0.00887011	0.00161729	-5.48455	4.14534e-08	0.965095	-0.00887011	0.00161729	2.07905e-06	37	22	42304331	22	40634277	F			NA	NA				chr22:42305617-42307254	N_Shore			TRUE				NA	22	41908326	+		ENSG00000198911.12	22	41833079	SREBF2	1	0.0354198	-1.87647
cg00724839	-0.0186725	0.00306428	-6.09361	1.1039e-09	-0.0160756	0.00301858	-5.32554	1.00656e-07	-0.0173545	0.00215043	-8.07025	7.01546e-16	0.833382	-0.0173545	0.00215043	1.49084e-13	37	22	39240704	22	37570650	F	rs12628473		NA	NA	NPTXR	NM_014293	TSS1500	chr22:39239168-39240425	S_Shore			NA				NA	22	38844698	+	NPTXR	ENSG00000221890.4	22	38818452	NPTXR	1	0.0422454	2.86566
cg00730561	-0.0145881	0.00393393	-3.70827	0.000208683	-0.0296105	0.00477663	-6.19902	5.68143e-10	-0.0206594	0.00303665	-6.80336	1.02208e-11	0.052511	-0.0206594	0.00303665	1.04439e-09	37	10	102279703	10	102269693	F			NA	NA	SEC31B	NM_015490	TSS200	chr10:102279162-102279730	Island			TRUE	10:102269153-102269720			NA	10	100519945	+	SEC31B	ENSG00000075826.17	10	100486646	SEC31B	1	0.0532191	2.00954
cg00782645	-0.0138908	0.00294953	-4.70951	2.48313e-06	-0.0111227	0.003418	-3.25417	0.00113724	-0.0127094	0.00223304	-5.6915	1.25928e-08	0.828644	-0.0127094	0.00223304	7.04655e-07	37	16	90115048	16	88642549	R			NA	NA	LOC100130015;LOC100130015	NR_027335;NR_027336	TSS1500;TSS1500	chr16:90118815-90119521	N_Shelf			NA	16:88642491-88642550	16:90114846-90115084	Unclassified_Cell_type_specific	NA	16	90048639	-	LOC100130015	ENSG00000260528.4	16	90102271	FAM157C	1	0.0778813	-4.98892
cg00805360	-0.0118903	0.00345852	-3.43798	0.000586068	-0.0174463	0.00353628	-4.93352	8.07587e-07	-0.0146066	0.00247258	-5.90743	3.47491e-09	0.532144	-0.0146066	0.00247258	2.17325e-07	37	10	135091210	10	134941200	R			NA	NA	ADAM8;ADAM8;ADAM8	NM_001109;NM_001164489;NM_001164490	TSS1500;TSS1500;TSS1500	chr10:135089969-135090491	S_Shore			TRUE				NA	10	133277705	-	ADAM8	ENSG00000130640.13	10	133278630	TUBGCP2	1	0.0313666	0.888251
cg00805360	-0.0118903	0.00345852	-3.43798	0.000586068	-0.0174463	0.00353628	-4.93352	8.07587e-07	-0.0146066	0.00247258	-5.90743	3.47491e-09	0.532144	-0.0146066	0.00247258	2.17325e-07	37	10	135091210	10	134941200	R			NA	NA	ADAM8;ADAM8;ADAM8	NM_001109;NM_001164489;NM_001164490	TSS1500;TSS1500;TSS1500	chr10:135089969-135090491	S_Shore			TRUE				NA	10	133277705	-	ADAM8	ENSG00000273980.1	10	133257144	AL592071.1	1	0.0192221	-0.57532
cg00808170	0.019268	0.0044652	4.31516	1.59488e-05	0.0152009	0.00422951	3.594	0.000325637	0.0171243	0.00307066	5.57675	2.45053e-08	0.803599	0.0171243	0.00307066	1.28929e-06	37	5	140807787	5	140787971	F			NA	NA	PCDHGA4;PCDHGA11;PCDHGA11;PCDHGA9;PCDHGA1;PCDHGB1;PCDHGB8P;PCDHGB6;PCDHGB3;PCDHGB7;PCDHGA6;PCDHGA8;PCDHGA10;PCDHGA5;PCDHGB4;PCDHGA3;PCDHGA2;PCDHGB2;PCDHGA7;PCDHGB5	NM_018917;NM_032092;NM_018914;NM_018921;NM_018912;NM_018922;NR_001297;NM_018926;NM_018924;NM_018927;NM_018919;NM_032088;NM_018913;NM_018918;NM_003736;NM_018916;NM_018915;NM_018923;NM_018920;NM_018925	Body;Body;Body;Body;Body;Body;Body;Body;Body;Body;Body;Body;Body;Body;Body;Body;Body;Body;Body;Body	chr5:140807339-140807788	Island			NA				NA	5	141428219	+	PCDHGA4;PCDHGA11;PCDHGA9;PCDHGA1;PCDHGB1;PCDHGB8P;PCDHGB6;PCDHGB3;PCDHGB7;PCDHGA6;PCDHGA8;PCDHGA10;PCDHGA5;PCDHGB4;PCDHGA3;PCDHGA2;PCDHGB2;PCDHGA7;PCDHGB5	ENSG00000253537.3	5	141382739	PCDHGA7	1	0.0446026	1.8205
cg00808170	0.019268	0.0044652	4.31516	1.59488e-05	0.0152009	0.00422951	3.594	0.000325637	0.0171243	0.00307066	5.57675	2.45053e-08	0.803599	0.0171243	0.00307066	1.28929e-06	37	5	140807787	5	140787971	F			NA	NA	PCDHGA4;PCDHGA11;PCDHGA11;PCDHGA9;PCDHGA1;PCDHGB1;PCDHGB8P;PCDHGB6;PCDHGB3;PCDHGB7;PCDHGA6;PCDHGA8;PCDHGA10;PCDHGA5;PCDHGB4;PCDHGA3;PCDHGA2;PCDHGB2;PCDHGA7;PCDHGB5	NM_018917;NM_032092;NM_018914;NM_018921;NM_018912;NM_018922;NR_001297;NM_018926;NM_018924;NM_018927;NM_018919;NM_032088;NM_018913;NM_018918;NM_003736;NM_018916;NM_018915;NM_018923;NM_018920;NM_018925	Body;Body;Body;Body;Body;Body;Body;Body;Body;Body;Body;Body;Body;Body;Body;Body;Body;Body;Body;Body	chr5:140807339-140807788	Island			NA				NA	5	141428219	+	PCDHGA4;PCDHGA11;PCDHGA9;PCDHGA1;PCDHGB1;PCDHGB8P;PCDHGB6;PCDHGB3;PCDHGB7;PCDHGA6;PCDHGA8;PCDHGA10;PCDHGA5;PCDHGB4;PCDHGA3;PCDHGA2;PCDHGB2;PCDHGA7;PCDHGB5	ENSG00000081853.15	5	141338760	PCDHGA2	1	0.0371869	1.64375
cg00808170	0.019268	0.0044652	4.31516	1.59488e-05	0.0152009	0.00422951	3.594	0.000325637	0.0171243	0.00307066	5.57675	2.45053e-08	0.803599	0.0171243	0.00307066	1.28929e-06	37	5	140807787	5	140787971	F			NA	NA	PCDHGA4;PCDHGA11;PCDHGA11;PCDHGA9;PCDHGA1;PCDHGB1;PCDHGB8P;PCDHGB6;PCDHGB3;PCDHGB7;PCDHGA6;PCDHGA8;PCDHGA10;PCDHGA5;PCDHGB4;PCDHGA3;PCDHGA2;PCDHGB2;PCDHGA7;PCDHGB5	NM_018917;NM_032092;NM_018914;NM_018921;NM_018912;NM_018922;NR_001297;NM_018926;NM_018924;NM_018927;NM_018919;NM_032088;NM_018913;NM_018918;NM_003736;NM_018916;NM_018915;NM_018923;NM_018920;NM_018925	Body;Body;Body;Body;Body;Body;Body;Body;Body;Body;Body;Body;Body;Body;Body;Body;Body;Body;Body;Body	chr5:140807339-140807788	Island			NA				NA	5	141428219	+	PCDHGA4;PCDHGA11;PCDHGA9;PCDHGA1;PCDHGB1;PCDHGB8P;PCDHGB6;PCDHGB3;PCDHGB7;PCDHGA6;PCDHGA8;PCDHGA10;PCDHGA5;PCDHGB4;PCDHGA3;PCDHGA2;PCDHGB2;PCDHGA7;PCDHGB5	ENSG00000253953.2	5	141387698	PCDHGB4	1	0.0403708	1.72184
cg00808170	0.019268	0.0044652	4.31516	1.59488e-05	0.0152009	0.00422951	3.594	0.000325637	0.0171243	0.00307066	5.57675	2.45053e-08	0.803599	0.0171243	0.00307066	1.28929e-06	37	5	140807787	5	140787971	F			NA	NA	PCDHGA4;PCDHGA11;PCDHGA11;PCDHGA9;PCDHGA1;PCDHGB1;PCDHGB8P;PCDHGB6;PCDHGB3;PCDHGB7;PCDHGA6;PCDHGA8;PCDHGA10;PCDHGA5;PCDHGB4;PCDHGA3;PCDHGA2;PCDHGB2;PCDHGA7;PCDHGB5	NM_018917;NM_032092;NM_018914;NM_018921;NM_018912;NM_018922;NR_001297;NM_018926;NM_018924;NM_018927;NM_018919;NM_032088;NM_018913;NM_018918;NM_003736;NM_018916;NM_018915;NM_018923;NM_018920;NM_018925	Body;Body;Body;Body;Body;Body;Body;Body;Body;Body;Body;Body;Body;Body;Body;Body;Body;Body;Body;Body	chr5:140807339-140807788	Island			NA				NA	5	141428219	+	PCDHGA4;PCDHGA11;PCDHGA9;PCDHGA1;PCDHGB1;PCDHGB8P;PCDHGB6;PCDHGB3;PCDHGB7;PCDHGA6;PCDHGA8;PCDHGA10;PCDHGA5;PCDHGB4;PCDHGA3;PCDHGA2;PCDHGB2;PCDHGA7;PCDHGB5	ENSG00000254221.2	5	141350102	PCDHGB1	1	0.037128	1.6386
cg00808170	0.019268	0.0044652	4.31516	1.59488e-05	0.0152009	0.00422951	3.594	0.000325637	0.0171243	0.00307066	5.57675	2.45053e-08	0.803599	0.0171243	0.00307066	1.28929e-06	37	5	140807787	5	140787971	F			NA	NA	PCDHGA4;PCDHGA11;PCDHGA11;PCDHGA9;PCDHGA1;PCDHGB1;PCDHGB8P;PCDHGB6;PCDHGB3;PCDHGB7;PCDHGA6;PCDHGA8;PCDHGA10;PCDHGA5;PCDHGB4;PCDHGA3;PCDHGA2;PCDHGB2;PCDHGA7;PCDHGB5	NM_018917;NM_032092;NM_018914;NM_018921;NM_018912;NM_018922;NR_001297;NM_018926;NM_018924;NM_018927;NM_018919;NM_032088;NM_018913;NM_018918;NM_003736;NM_018916;NM_018915;NM_018923;NM_018920;NM_018925	Body;Body;Body;Body;Body;Body;Body;Body;Body;Body;Body;Body;Body;Body;Body;Body;Body;Body;Body;Body	chr5:140807339-140807788	Island			NA				NA	5	141428219	+	PCDHGA4;PCDHGA11;PCDHGA9;PCDHGA1;PCDHGB1;PCDHGB8P;PCDHGB6;PCDHGB3;PCDHGB7;PCDHGA6;PCDHGA8;PCDHGA10;PCDHGA5;PCDHGB4;PCDHGA3;PCDHGA2;PCDHGB2;PCDHGA7;PCDHGB5	ENSG00000261934.2	5	141402932	PCDHGA9	1	0.0370645	1.64918
cg00808170	0.019268	0.0044652	4.31516	1.59488e-05	0.0152009	0.00422951	3.594	0.000325637	0.0171243	0.00307066	5.57675	2.45053e-08	0.803599	0.0171243	0.00307066	1.28929e-06	37	5	140807787	5	140787971	F			NA	NA	PCDHGA4;PCDHGA11;PCDHGA11;PCDHGA9;PCDHGA1;PCDHGB1;PCDHGB8P;PCDHGB6;PCDHGB3;PCDHGB7;PCDHGA6;PCDHGA8;PCDHGA10;PCDHGA5;PCDHGB4;PCDHGA3;PCDHGA2;PCDHGB2;PCDHGA7;PCDHGB5	NM_018917;NM_032092;NM_018914;NM_018921;NM_018912;NM_018922;NR_001297;NM_018926;NM_018924;NM_018927;NM_018919;NM_032088;NM_018913;NM_018918;NM_003736;NM_018916;NM_018915;NM_018923;NM_018920;NM_018925	Body;Body;Body;Body;Body;Body;Body;Body;Body;Body;Body;Body;Body;Body;Body;Body;Body;Body;Body;Body	chr5:140807339-140807788	Island			NA				NA	5	141428219	+	PCDHGA4;PCDHGA11;PCDHGA9;PCDHGA1;PCDHGB1;PCDHGB8P;PCDHGB6;PCDHGB3;PCDHGB7;PCDHGA6;PCDHGA8;PCDHGA10;PCDHGA5;PCDHGB4;PCDHGA3;PCDHGA2;PCDHGB2;PCDHGA7;PCDHGB5	ENSG00000240184.7	5	141475947	PCDHGC3	1	0.033897	1.57359
cg00808170	0.019268	0.0044652	4.31516	1.59488e-05	0.0152009	0.00422951	3.594	0.000325637	0.0171243	0.00307066	5.57675	2.45053e-08	0.803599	0.0171243	0.00307066	1.28929e-06	37	5	140807787	5	140787971	F			NA	NA	PCDHGA4;PCDHGA11;PCDHGA11;PCDHGA9;PCDHGA1;PCDHGB1;PCDHGB8P;PCDHGB6;PCDHGB3;PCDHGB7;PCDHGA6;PCDHGA8;PCDHGA10;PCDHGA5;PCDHGB4;PCDHGA3;PCDHGA2;PCDHGB2;PCDHGA7;PCDHGB5	NM_018917;NM_032092;NM_018914;NM_018921;NM_018912;NM_018922;NR_001297;NM_018926;NM_018924;NM_018927;NM_018919;NM_032088;NM_018913;NM_018918;NM_003736;NM_018916;NM_018915;NM_018923;NM_018920;NM_018925	Body;Body;Body;Body;Body;Body;Body;Body;Body;Body;Body;Body;Body;Body;Body;Body;Body;Body;Body;Body	chr5:140807339-140807788	Island			NA				NA	5	141428219	+	PCDHGA4;PCDHGA11;PCDHGA9;PCDHGA1;PCDHGB1;PCDHGB8P;PCDHGB6;PCDHGB3;PCDHGB7;PCDHGA6;PCDHGA8;PCDHGA10;PCDHGA5;PCDHGB4;PCDHGA3;PCDHGA2;PCDHGB2;PCDHGA7;PCDHGB5	ENSG00000253731.2	5	141373914	PCDHGA6	1	0.0436644	1.7929
cg00808170	0.019268	0.0044652	4.31516	1.59488e-05	0.0152009	0.00422951	3.594	0.000325637	0.0171243	0.00307066	5.57675	2.45053e-08	0.803599	0.0171243	0.00307066	1.28929e-06	37	5	140807787	5	140787971	F			NA	NA	PCDHGA4;PCDHGA11;PCDHGA11;PCDHGA9;PCDHGA1;PCDHGB1;PCDHGB8P;PCDHGB6;PCDHGB3;PCDHGB7;PCDHGA6;PCDHGA8;PCDHGA10;PCDHGA5;PCDHGB4;PCDHGA3;PCDHGA2;PCDHGB2;PCDHGA7;PCDHGB5	NM_018917;NM_032092;NM_018914;NM_018921;NM_018912;NM_018922;NR_001297;NM_018926;NM_018924;NM_018927;NM_018919;NM_032088;NM_018913;NM_018918;NM_003736;NM_018916;NM_018915;NM_018923;NM_018920;NM_018925	Body;Body;Body;Body;Body;Body;Body;Body;Body;Body;Body;Body;Body;Body;Body;Body;Body;Body;Body;Body	chr5:140807339-140807788	Island			NA				NA	5	141428219	+	PCDHGA4;PCDHGA11;PCDHGA9;PCDHGA1;PCDHGB1;PCDHGB8P;PCDHGB6;PCDHGB3;PCDHGB7;PCDHGA6;PCDHGA8;PCDHGA10;PCDHGA5;PCDHGB4;PCDHGA3;PCDHGA2;PCDHGB2;PCDHGA7;PCDHGB5	ENSG00000254122.2	5	141417645	PCDHGB7	1	0.0384026	1.67706
cg00808170	0.019268	0.0044652	4.31516	1.59488e-05	0.0152009	0.00422951	3.594	0.000325637	0.0171243	0.00307066	5.57675	2.45053e-08	0.803599	0.0171243	0.00307066	1.28929e-06	37	5	140807787	5	140787971	F			NA	NA	PCDHGA4;PCDHGA11;PCDHGA11;PCDHGA9;PCDHGA1;PCDHGB1;PCDHGB8P;PCDHGB6;PCDHGB3;PCDHGB7;PCDHGA6;PCDHGA8;PCDHGA10;PCDHGA5;PCDHGB4;PCDHGA3;PCDHGA2;PCDHGB2;PCDHGA7;PCDHGB5	NM_018917;NM_032092;NM_018914;NM_018921;NM_018912;NM_018922;NR_001297;NM_018926;NM_018924;NM_018927;NM_018919;NM_032088;NM_018913;NM_018918;NM_003736;NM_018916;NM_018915;NM_018923;NM_018920;NM_018925	Body;Body;Body;Body;Body;Body;Body;Body;Body;Body;Body;Body;Body;Body;Body;Body;Body;Body;Body;Body	chr5:140807339-140807788	Island			NA				NA	5	141428219	+	PCDHGA4;PCDHGA11;PCDHGA9;PCDHGA1;PCDHGB1;PCDHGB8P;PCDHGB6;PCDHGB3;PCDHGB7;PCDHGA6;PCDHGA8;PCDHGA10;PCDHGA5;PCDHGB4;PCDHGA3;PCDHGA2;PCDHGB2;PCDHGA7;PCDHGB5	ENSG00000253910.2	5	141360042	PCDHGB2	1	0.0394159	1.69382
cg00808170	0.019268	0.0044652	4.31516	1.59488e-05	0.0152009	0.00422951	3.594	0.000325637	0.0171243	0.00307066	5.57675	2.45053e-08	0.803599	0.0171243	0.00307066	1.28929e-06	37	5	140807787	5	140787971	F			NA	NA	PCDHGA4;PCDHGA11;PCDHGA11;PCDHGA9;PCDHGA1;PCDHGB1;PCDHGB8P;PCDHGB6;PCDHGB3;PCDHGB7;PCDHGA6;PCDHGA8;PCDHGA10;PCDHGA5;PCDHGB4;PCDHGA3;PCDHGA2;PCDHGB2;PCDHGA7;PCDHGB5	NM_018917;NM_032092;NM_018914;NM_018921;NM_018912;NM_018922;NR_001297;NM_018926;NM_018924;NM_018927;NM_018919;NM_032088;NM_018913;NM_018918;NM_003736;NM_018916;NM_018915;NM_018923;NM_018920;NM_018925	Body;Body;Body;Body;Body;Body;Body;Body;Body;Body;Body;Body;Body;Body;Body;Body;Body;Body;Body;Body	chr5:140807339-140807788	Island			NA				NA	5	141428219	+	PCDHGA4;PCDHGA11;PCDHGA9;PCDHGA1;PCDHGB1;PCDHGB8P;PCDHGB6;PCDHGB3;PCDHGB7;PCDHGA6;PCDHGA8;PCDHGA10;PCDHGA5;PCDHGB4;PCDHGA3;PCDHGA2;PCDHGB2;PCDHGA7;PCDHGB5	ENSG00000262576.3	5	141355021	PCDHGA4	1	0.0377383	1.6586
cg00808170	0.019268	0.0044652	4.31516	1.59488e-05	0.0152009	0.00422951	3.594	0.000325637	0.0171243	0.00307066	5.57675	2.45053e-08	0.803599	0.0171243	0.00307066	1.28929e-06	37	5	140807787	5	140787971	F			NA	NA	PCDHGA4;PCDHGA11;PCDHGA11;PCDHGA9;PCDHGA1;PCDHGB1;PCDHGB8P;PCDHGB6;PCDHGB3;PCDHGB7;PCDHGA6;PCDHGA8;PCDHGA10;PCDHGA5;PCDHGB4;PCDHGA3;PCDHGA2;PCDHGB2;PCDHGA7;PCDHGB5	NM_018917;NM_032092;NM_018914;NM_018921;NM_018912;NM_018922;NR_001297;NM_018926;NM_018924;NM_018927;NM_018919;NM_032088;NM_018913;NM_018918;NM_003736;NM_018916;NM_018915;NM_018923;NM_018920;NM_018925	Body;Body;Body;Body;Body;Body;Body;Body;Body;Body;Body;Body;Body;Body;Body;Body;Body;Body;Body;Body	chr5:140807339-140807788	Island			NA				NA	5	141428219	+	PCDHGA4;PCDHGA11;PCDHGA9;PCDHGA1;PCDHGB1;PCDHGB8P;PCDHGB6;PCDHGB3;PCDHGB7;PCDHGA6;PCDHGA8;PCDHGA10;PCDHGA5;PCDHGB4;PCDHGA3;PCDHGA2;PCDHGB2;PCDHGA7;PCDHGB5	ENSG00000253485.2	5	141364232	PCDHGA5	1	0.038875	1.68146
cg00808170	0.019268	0.0044652	4.31516	1.59488e-05	0.0152009	0.00422951	3.594	0.000325637	0.0171243	0.00307066	5.57675	2.45053e-08	0.803599	0.0171243	0.00307066	1.28929e-06	37	5	140807787	5	140787971	F			NA	NA	PCDHGA4;PCDHGA11;PCDHGA11;PCDHGA9;PCDHGA1;PCDHGB1;PCDHGB8P;PCDHGB6;PCDHGB3;PCDHGB7;PCDHGA6;PCDHGA8;PCDHGA10;PCDHGA5;PCDHGB4;PCDHGA3;PCDHGA2;PCDHGB2;PCDHGA7;PCDHGB5	NM_018917;NM_032092;NM_018914;NM_018921;NM_018912;NM_018922;NR_001297;NM_018926;NM_018924;NM_018927;NM_018919;NM_032088;NM_018913;NM_018918;NM_003736;NM_018916;NM_018915;NM_018923;NM_018920;NM_018925	Body;Body;Body;Body;Body;Body;Body;Body;Body;Body;Body;Body;Body;Body;Body;Body;Body;Body;Body;Body	chr5:140807339-140807788	Island			NA				NA	5	141428219	+	PCDHGA4;PCDHGA11;PCDHGA9;PCDHGA1;PCDHGB1;PCDHGB8P;PCDHGB6;PCDHGB3;PCDHGB7;PCDHGA6;PCDHGA8;PCDHGA10;PCDHGA5;PCDHGB4;PCDHGA3;PCDHGA2;PCDHGB2;PCDHGA7;PCDHGB5	ENSG00000262209.3	5	141370242	PCDHGB3	1	0.0386274	1.67962
cg00808170	0.019268	0.0044652	4.31516	1.59488e-05	0.0152009	0.00422951	3.594	0.000325637	0.0171243	0.00307066	5.57675	2.45053e-08	0.803599	0.0171243	0.00307066	1.28929e-06	37	5	140807787	5	140787971	F			NA	NA	PCDHGA4;PCDHGA11;PCDHGA11;PCDHGA9;PCDHGA1;PCDHGB1;PCDHGB8P;PCDHGB6;PCDHGB3;PCDHGB7;PCDHGA6;PCDHGA8;PCDHGA10;PCDHGA5;PCDHGB4;PCDHGA3;PCDHGA2;PCDHGB2;PCDHGA7;PCDHGB5	NM_018917;NM_032092;NM_018914;NM_018921;NM_018912;NM_018922;NR_001297;NM_018926;NM_018924;NM_018927;NM_018919;NM_032088;NM_018913;NM_018918;NM_003736;NM_018916;NM_018915;NM_018923;NM_018920;NM_018925	Body;Body;Body;Body;Body;Body;Body;Body;Body;Body;Body;Body;Body;Body;Body;Body;Body;Body;Body;Body	chr5:140807339-140807788	Island			NA				NA	5	141428219	+	PCDHGA4;PCDHGA11;PCDHGA9;PCDHGA1;PCDHGB1;PCDHGB8P;PCDHGB6;PCDHGB3;PCDHGB7;PCDHGA6;PCDHGA8;PCDHGA10;PCDHGA5;PCDHGB4;PCDHGA3;PCDHGA2;PCDHGB2;PCDHGA7;PCDHGB5	ENSG00000204956.5	5	141330571	PCDHGA1	1	0.0371824	1.6221
cg00808170	0.019268	0.0044652	4.31516	1.59488e-05	0.0152009	0.00422951	3.594	0.000325637	0.0171243	0.00307066	5.57675	2.45053e-08	0.803599	0.0171243	0.00307066	1.28929e-06	37	5	140807787	5	140787971	F			NA	NA	PCDHGA4;PCDHGA11;PCDHGA11;PCDHGA9;PCDHGA1;PCDHGB1;PCDHGB8P;PCDHGB6;PCDHGB3;PCDHGB7;PCDHGA6;PCDHGA8;PCDHGA10;PCDHGA5;PCDHGB4;PCDHGA3;PCDHGA2;PCDHGB2;PCDHGA7;PCDHGB5	NM_018917;NM_032092;NM_018914;NM_018921;NM_018912;NM_018922;NR_001297;NM_018926;NM_018924;NM_018927;NM_018919;NM_032088;NM_018913;NM_018918;NM_003736;NM_018916;NM_018915;NM_018923;NM_018920;NM_018925	Body;Body;Body;Body;Body;Body;Body;Body;Body;Body;Body;Body;Body;Body;Body;Body;Body;Body;Body;Body	chr5:140807339-140807788	Island			NA				NA	5	141428219	+	PCDHGA4;PCDHGA11;PCDHGA9;PCDHGA1;PCDHGB1;PCDHGB8P;PCDHGB6;PCDHGB3;PCDHGB7;PCDHGA6;PCDHGA8;PCDHGA10;PCDHGA5;PCDHGB4;PCDHGA3;PCDHGA2;PCDHGB2;PCDHGA7;PCDHGB5	ENSG00000240764.3	5	141489121	PCDHGC5	1	0.0376814	1.67395
cg00808170	0.019268	0.0044652	4.31516	1.59488e-05	0.0152009	0.00422951	3.594	0.000325637	0.0171243	0.00307066	5.57675	2.45053e-08	0.803599	0.0171243	0.00307066	1.28929e-06	37	5	140807787	5	140787971	F			NA	NA	PCDHGA4;PCDHGA11;PCDHGA11;PCDHGA9;PCDHGA1;PCDHGB1;PCDHGB8P;PCDHGB6;PCDHGB3;PCDHGB7;PCDHGA6;PCDHGA8;PCDHGA10;PCDHGA5;PCDHGB4;PCDHGA3;PCDHGA2;PCDHGB2;PCDHGA7;PCDHGB5	NM_018917;NM_032092;NM_018914;NM_018921;NM_018912;NM_018922;NR_001297;NM_018926;NM_018924;NM_018927;NM_018919;NM_032088;NM_018913;NM_018918;NM_003736;NM_018916;NM_018915;NM_018923;NM_018920;NM_018925	Body;Body;Body;Body;Body;Body;Body;Body;Body;Body;Body;Body;Body;Body;Body;Body;Body;Body;Body;Body	chr5:140807339-140807788	Island			NA				NA	5	141428219	+	PCDHGA4;PCDHGA11;PCDHGA9;PCDHGA1;PCDHGB1;PCDHGB8P;PCDHGB6;PCDHGB3;PCDHGB7;PCDHGA6;PCDHGA8;PCDHGA10;PCDHGA5;PCDHGB4;PCDHGA3;PCDHGA2;PCDHGB2;PCDHGA7;PCDHGB5	ENSG00000242419.5	5	141484997	PCDHGC4	1	0.0374815	1.6534
cg00808170	0.019268	0.0044652	4.31516	1.59488e-05	0.0152009	0.00422951	3.594	0.000325637	0.0171243	0.00307066	5.57675	2.45053e-08	0.803599	0.0171243	0.00307066	1.28929e-06	37	5	140807787	5	140787971	F			NA	NA	PCDHGA4;PCDHGA11;PCDHGA11;PCDHGA9;PCDHGA1;PCDHGB1;PCDHGB8P;PCDHGB6;PCDHGB3;PCDHGB7;PCDHGA6;PCDHGA8;PCDHGA10;PCDHGA5;PCDHGB4;PCDHGA3;PCDHGA2;PCDHGB2;PCDHGA7;PCDHGB5	NM_018917;NM_032092;NM_018914;NM_018921;NM_018912;NM_018922;NR_001297;NM_018926;NM_018924;NM_018927;NM_018919;NM_032088;NM_018913;NM_018918;NM_003736;NM_018916;NM_018915;NM_018923;NM_018920;NM_018925	Body;Body;Body;Body;Body;Body;Body;Body;Body;Body;Body;Body;Body;Body;Body;Body;Body;Body;Body;Body	chr5:140807339-140807788	Island			NA				NA	5	141428219	+	PCDHGA4;PCDHGA11;PCDHGA9;PCDHGA1;PCDHGB1;PCDHGB8P;PCDHGB6;PCDHGB3;PCDHGB7;PCDHGA6;PCDHGA8;PCDHGA10;PCDHGA5;PCDHGB4;PCDHGA3;PCDHGA2;PCDHGB2;PCDHGA7;PCDHGB5	ENSG00000253305.2	5	141408021	PCDHGB6	1	0.0415985	1.82371
cg00808170	0.019268	0.0044652	4.31516	1.59488e-05	0.0152009	0.00422951	3.594	0.000325637	0.0171243	0.00307066	5.57675	2.45053e-08	0.803599	0.0171243	0.00307066	1.28929e-06	37	5	140807787	5	140787971	F			NA	NA	PCDHGA4;PCDHGA11;PCDHGA11;PCDHGA9;PCDHGA1;PCDHGB1;PCDHGB8P;PCDHGB6;PCDHGB3;PCDHGB7;PCDHGA6;PCDHGA8;PCDHGA10;PCDHGA5;PCDHGB4;PCDHGA3;PCDHGA2;PCDHGB2;PCDHGA7;PCDHGB5	NM_018917;NM_032092;NM_018914;NM_018921;NM_018912;NM_018922;NR_001297;NM_018926;NM_018924;NM_018927;NM_018919;NM_032088;NM_018913;NM_018918;NM_003736;NM_018916;NM_018915;NM_018923;NM_018920;NM_018925	Body;Body;Body;Body;Body;Body;Body;Body;Body;Body;Body;Body;Body;Body;Body;Body;Body;Body;Body;Body	chr5:140807339-140807788	Island			NA				NA	5	141428219	+	PCDHGA4;PCDHGA11;PCDHGA9;PCDHGA1;PCDHGB1;PCDHGB8P;PCDHGB6;PCDHGB3;PCDHGB7;PCDHGA6;PCDHGA8;PCDHGA10;PCDHGA5;PCDHGB4;PCDHGA3;PCDHGA2;PCDHGB2;PCDHGA7;PCDHGB5	ENSG00000253873.6	5	141421047	PCDHGA11	1	0.0389371	1.69015
cg00808170	0.019268	0.0044652	4.31516	1.59488e-05	0.0152009	0.00422951	3.594	0.000325637	0.0171243	0.00307066	5.57675	2.45053e-08	0.803599	0.0171243	0.00307066	1.28929e-06	37	5	140807787	5	140787971	F			NA	NA	PCDHGA4;PCDHGA11;PCDHGA11;PCDHGA9;PCDHGA1;PCDHGB1;PCDHGB8P;PCDHGB6;PCDHGB3;PCDHGB7;PCDHGA6;PCDHGA8;PCDHGA10;PCDHGA5;PCDHGB4;PCDHGA3;PCDHGA2;PCDHGB2;PCDHGA7;PCDHGB5	NM_018917;NM_032092;NM_018914;NM_018921;NM_018912;NM_018922;NR_001297;NM_018926;NM_018924;NM_018927;NM_018919;NM_032088;NM_018913;NM_018918;NM_003736;NM_018916;NM_018915;NM_018923;NM_018920;NM_018925	Body;Body;Body;Body;Body;Body;Body;Body;Body;Body;Body;Body;Body;Body;Body;Body;Body;Body;Body;Body	chr5:140807339-140807788	Island			NA				NA	5	141428219	+	PCDHGA4;PCDHGA11;PCDHGA9;PCDHGA1;PCDHGB1;PCDHGB8P;PCDHGB6;PCDHGB3;PCDHGB7;PCDHGA6;PCDHGA8;PCDHGA10;PCDHGA5;PCDHGB4;PCDHGA3;PCDHGA2;PCDHGB2;PCDHGA7;PCDHGB5	ENSG00000253846.2	5	141412987	PCDHGA10	1	0.040051	1.7741
cg00808170	0.019268	0.0044652	4.31516	1.59488e-05	0.0152009	0.00422951	3.594	0.000325637	0.0171243	0.00307066	5.57675	2.45053e-08	0.803599	0.0171243	0.00307066	1.28929e-06	37	5	140807787	5	140787971	F			NA	NA	PCDHGA4;PCDHGA11;PCDHGA11;PCDHGA9;PCDHGA1;PCDHGB1;PCDHGB8P;PCDHGB6;PCDHGB3;PCDHGB7;PCDHGA6;PCDHGA8;PCDHGA10;PCDHGA5;PCDHGB4;PCDHGA3;PCDHGA2;PCDHGB2;PCDHGA7;PCDHGB5	NM_018917;NM_032092;NM_018914;NM_018921;NM_018912;NM_018922;NR_001297;NM_018926;NM_018924;NM_018927;NM_018919;NM_032088;NM_018913;NM_018918;NM_003736;NM_018916;NM_018915;NM_018923;NM_018920;NM_018925	Body;Body;Body;Body;Body;Body;Body;Body;Body;Body;Body;Body;Body;Body;Body;Body;Body;Body;Body;Body	chr5:140807339-140807788	Island			NA				NA	5	141428219	+	PCDHGA4;PCDHGA11;PCDHGA9;PCDHGA1;PCDHGB1;PCDHGB8P;PCDHGB6;PCDHGB3;PCDHGB7;PCDHGA6;PCDHGA8;PCDHGA10;PCDHGA5;PCDHGB4;PCDHGA3;PCDHGA2;PCDHGB2;PCDHGA7;PCDHGB5	ENSG00000254245.2	5	141343829	PCDHGA3	1	0.0370616	1.641
cg00808170	0.019268	0.0044652	4.31516	1.59488e-05	0.0152009	0.00422951	3.594	0.000325637	0.0171243	0.00307066	5.57675	2.45053e-08	0.803599	0.0171243	0.00307066	1.28929e-06	37	5	140807787	5	140787971	F			NA	NA	PCDHGA4;PCDHGA11;PCDHGA11;PCDHGA9;PCDHGA1;PCDHGB1;PCDHGB8P;PCDHGB6;PCDHGB3;PCDHGB7;PCDHGA6;PCDHGA8;PCDHGA10;PCDHGA5;PCDHGB4;PCDHGA3;PCDHGA2;PCDHGB2;PCDHGA7;PCDHGB5	NM_018917;NM_032092;NM_018914;NM_018921;NM_018912;NM_018922;NR_001297;NM_018926;NM_018924;NM_018927;NM_018919;NM_032088;NM_018913;NM_018918;NM_003736;NM_018916;NM_018915;NM_018923;NM_018920;NM_018925	Body;Body;Body;Body;Body;Body;Body;Body;Body;Body;Body;Body;Body;Body;Body;Body;Body;Body;Body;Body	chr5:140807339-140807788	Island			NA				NA	5	141428219	+	PCDHGA4;PCDHGA11;PCDHGA9;PCDHGA1;PCDHGB1;PCDHGB8P;PCDHGB6;PCDHGB3;PCDHGB7;PCDHGA6;PCDHGA8;PCDHGA10;PCDHGA5;PCDHGB4;PCDHGA3;PCDHGA2;PCDHGB2;PCDHGA7;PCDHGB5	ENSG00000276547.1	5	141397987	PCDHGB5	1	0.013892	0.308358
cg00808170	0.019268	0.0044652	4.31516	1.59488e-05	0.0152009	0.00422951	3.594	0.000325637	0.0171243	0.00307066	5.57675	2.45053e-08	0.803599	0.0171243	0.00307066	1.28929e-06	37	5	140807787	5	140787971	F			NA	NA	PCDHGA4;PCDHGA11;PCDHGA11;PCDHGA9;PCDHGA1;PCDHGB1;PCDHGB8P;PCDHGB6;PCDHGB3;PCDHGB7;PCDHGA6;PCDHGA8;PCDHGA10;PCDHGA5;PCDHGB4;PCDHGA3;PCDHGA2;PCDHGB2;PCDHGA7;PCDHGB5	NM_018917;NM_032092;NM_018914;NM_018921;NM_018912;NM_018922;NR_001297;NM_018926;NM_018924;NM_018927;NM_018919;NM_032088;NM_018913;NM_018918;NM_003736;NM_018916;NM_018915;NM_018923;NM_018920;NM_018925	Body;Body;Body;Body;Body;Body;Body;Body;Body;Body;Body;Body;Body;Body;Body;Body;Body;Body;Body;Body	chr5:140807339-140807788	Island			NA				NA	5	141428219	+	PCDHGA4;PCDHGA11;PCDHGA9;PCDHGA1;PCDHGB1;PCDHGB8P;PCDHGB6;PCDHGB3;PCDHGB7;PCDHGA6;PCDHGA8;PCDHGA10;PCDHGA5;PCDHGB4;PCDHGA3;PCDHGA2;PCDHGB2;PCDHGA7;PCDHGB5	ENSG00000253767.2	5	141390157	PCDHGA8	1	0.0381938	1.66896
cg00808170	0.019268	0.0044652	4.31516	1.59488e-05	0.0152009	0.00422951	3.594	0.000325637	0.0171243	0.00307066	5.57675	2.45053e-08	0.803599	0.0171243	0.00307066	1.28929e-06	37	5	140807787	5	140787971	F			NA	NA	PCDHGA4;PCDHGA11;PCDHGA11;PCDHGA9;PCDHGA1;PCDHGB1;PCDHGB8P;PCDHGB6;PCDHGB3;PCDHGB7;PCDHGA6;PCDHGA8;PCDHGA10;PCDHGA5;PCDHGB4;PCDHGA3;PCDHGA2;PCDHGB2;PCDHGA7;PCDHGB5	NM_018917;NM_032092;NM_018914;NM_018921;NM_018912;NM_018922;NR_001297;NM_018926;NM_018924;NM_018927;NM_018919;NM_032088;NM_018913;NM_018918;NM_003736;NM_018916;NM_018915;NM_018923;NM_018920;NM_018925	Body;Body;Body;Body;Body;Body;Body;Body;Body;Body;Body;Body;Body;Body;Body;Body;Body;Body;Body;Body	chr5:140807339-140807788	Island			NA				NA	5	141428219	+	PCDHGA4;PCDHGA11;PCDHGA9;PCDHGA1;PCDHGB1;PCDHGB8P;PCDHGB6;PCDHGB3;PCDHGB7;PCDHGA6;PCDHGA8;PCDHGA10;PCDHGA5;PCDHGB4;PCDHGA3;PCDHGA2;PCDHGB2;PCDHGA7;PCDHGB5	ENSG00000253159.3	5	141430507	PCDHGA12	1	0.0387862	1.69016
cg00824381	-0.0188212	0.00317492	-5.92809	3.06479e-09	-0.0192081	0.00305654	-6.28428	3.29381e-10	-0.019022	0.00220196	-8.63867	5.68692e-18	0.996154	-0.019022	0.00220196	1.74213e-15	37	16	31708460	16	31615961	F			NA	NA				chr16:31711839-31712343	N_Shelf			NA		16:31708258-31708524	Unclassified_Cell_type_specific	NA	16	31697138	+		ENSG00000131797.12	16	31700590	CLUHP3	1	0.0328582	2.04834
cg00838415	-0.00890377	0.00246367	-3.61403	0.00030147	-0.0118682	0.00220818	-5.37465	7.67325e-08	-0.0105476	0.00164435	-6.41445	1.41328e-10	0.669364	-0.0105476	0.00164435	1.16251e-08	37	19	47253604	19	51945444	R			NA	NA	FKRP;FKRP	NM_001039885;NM_024301	5'UTR;5'UTR	chr19:47248749-47249948	S_Shelf			NA		19:47253344-47253667	Unclassified	TRUE	19	46750346	-	FKRP	ENSG00000105287.12	19	46674275	PRKD2	1	0.0191146	1.7255
cg00838415	-0.00890377	0.00246367	-3.61403	0.00030147	-0.0118682	0.00220818	-5.37465	7.67325e-08	-0.0105476	0.00164435	-6.41445	1.41328e-10	0.669364	-0.0105476	0.00164435	1.16251e-08	37	19	47253604	19	51945444	R			NA	NA	FKRP;FKRP	NM_001039885;NM_024301	5'UTR;5'UTR	chr19:47248749-47249948	S_Shelf			NA		19:47253344-47253667	Unclassified	TRUE	19	46750346	-	FKRP	ENSG00000181027.10	19	46746046	FKRP	1	0.0159087	1.28027
cg00863378	-0.0138012	0.00336746	-4.09841	4.16e-05	-0.0310218	0.00325175	-9.54003	1.42792e-21	-0.0227125	0.00233917	-9.70961	2.74376e-22	0.00115199	-0.0227125	0.00233917	1.68104e-19	37	16	56549757	16	55107258	R			NA	NA	BBS2	NM_031885	Body	chr16:56553529-56554075	N_Shelf			NA				NA	16	56515844	-	BBS2	ENSG00000125124.12	16	56466836	BBS2	1	0.0908493	-2.291
cg00863378	-0.0138012	0.00336746	-4.09841	4.16e-05	-0.0310218	0.00325175	-9.54003	1.42792e-21	-0.0227125	0.00233917	-9.70961	2.74376e-22	0.00115199	-0.0227125	0.00233917	1.68104e-19	37	16	56549757	16	55107258	R			NA	NA	BBS2	NM_031885	Body	chr16:56553529-56554075	N_Shelf			NA				NA	16	56515844	-	BBS2	ENSG00000159461.15	16	56361452	AMFR	1	0.0212036	-0.789946
cg00920892	0.0158121	0.0023055	6.85844	6.96168e-12	0.00120059	0.00270884	0.443211	0.657613	0.00967413	0.0017557	5.51014	3.58558e-08	0.000216804	0.00967413	0.0017557	1.82295e-06	37	8	37732224	8	37851382	R			NA	NA	RAB11FIP1;RAB11FIP1;RAB11FIP1	NM_025151;NM_001002233;NM_001002814	Body;TSS1500;Body					NA		8:37732151-37732415	Gene_Associated_Cell_type_specific	NA	8	37874705	-	RAB11FIP1	ENSG00000147535.17	8	38263130	PLPP5	1	0.0228707	-2.7274
cg00921350	-0.0171557	0.00272485	-6.29603	3.05357e-10	-0.0101262	0.00308782	-3.2794	0.00104029	-0.0140782	0.00204309	-6.89063	5.55452e-12	0.23297	-0.0140782	0.00204309	5.98472e-10	37	16	50701499	16	49259000	R			NA	NA	SNX20;SNX20	NM_153337;NM_001144972	3'UTR;3'UTR					NA		16:50698948-50701771	Promoter_Associated	NA	16	50667587	-	SNX20	ENSG00000167208.15	16	50666300	SNX20	1	0.0205731	-0.937302
cg00921350	-0.0171557	0.00272485	-6.29603	3.05357e-10	-0.0101262	0.00308782	-3.2794	0.00104029	-0.0140782	0.00204309	-6.89063	5.55452e-12	0.23297	-0.0140782	0.00204309	5.98472e-10	37	16	50701499	16	49259000	R			NA	NA	SNX20;SNX20	NM_153337;NM_001144972	3'UTR;3'UTR					NA		16:50698948-50701771	Promoter_Associated	NA	16	50667587	-	SNX20	ENSG00000083799.17	16	50742050	CYLD	1	0.0207368	-0.838885
cg00932063	-0.0229353	0.00496589	-4.61857	3.86398e-06	-0.0286854	0.0065443	-4.38326	1.16916e-05	-0.0250364	0.00395592	-6.32884	2.47009e-10	0.782738	-0.0250364	0.00395592	1.94592e-08	37	10	126234138	10	126224128	R			NA	NA	LHPP;LHPP	NM_022126;NM_001167880	Body;Body					NA	10:126224071-126224235	10:126233921-126234283	Unclassified_Cell_type_specific	NA	10	124545568	-	LHPP	ENSG00000107902.14	10	124461823	LHPP	1	0.0199654	0.667106
cg00945810	-0.0238326	0.00496876	-4.79649	1.61471e-06	-0.0275945	0.00556294	-4.96042	7.03414e-07	-0.025502	0.00370577	-6.88169	5.9146e-12	0.880568	-0.025502	0.00370577	6.33286e-10	37	7	814391	7	780917	F	rs7783647		NA	NA	HEATR2	NM_017802	Body	chr7:813627-814392	Island			NA	7:779302-780918	7:813984-814833	Gene_Associated	TRUE	7	774753	+	HEATR2	ENSG00000164818.16	7	726699	DNAAF5	1	0.0219778	0.527367
cg00960790	-0.00923644	0.00240153	-3.84607	0.000120029	-0.0107468	0.00238364	-4.50855	6.5271e-06	-0.00999726	0.00169178	-5.90932	3.43526e-09	0.905181	-0.00999726	0.00169178	2.14966e-07	37	16	15247312	16	15154813	R			NA	NA				chr16:15247870-15249155	N_Shore			NA				NA	16	15153454	-		ENSG00000179889.18	16	14974591	PDXDC1	1	0.0189549	-0.72725
cg01028796	-0.0441667	0.00396438	-11.1409	7.93187e-29	-0.0270838	0.00331447	-8.17136	3.04923e-16	-0.034112	0.00254283	-13.415	4.94079e-41	0.0042343	-0.034112	0.00254283	5.94788e-37	37	9	95525261	9	94565082	F		rs79087898	NA	NA	BICD2;BICD2	NM_015250;NM_001003800	Body;Body	chr9:95526459-95527825	N_Shore			NA		9:95525053-95525403	Promoter_Associated	NA	9	92762978	+	BICD2	ENSG00000185963.14	9	92711363	BICD2	1	0.0500919	-0.966348
cg01038207	-0.0161878	0.00362916	-4.46048	8.17773e-06	-0.0123912	0.00290217	-4.26965	1.9578e-05	-0.0138721	0.00226656	-6.12032	9.33898e-10	0.716232	-0.0138721	0.00226656	6.55595e-08	37	3	50330361	3	50305365	F			NA	NA	HYAL3;IFRD2	NM_003549;NM_006764	3'UTR;TSS1500	chr3:50329399-50330116	S_Shore			NA		3:50329097-50330585	Promoter_Associated	NA	3	50292929	+	HYAL3;IFRD2	ENSG00000186792.17	3	50292831	HYAL3	1	0.0508495	2.09674
cg01044849	0.0154541	0.00292488	5.28368	1.26617e-07	0.00747854	0.00276215	2.7075	0.00677912	0.0112383	0.0020082	5.5962	2.19097e-08	0.140133	0.0112383	0.0020082	1.16511e-06	37	6	30002723	6	30110702	F			NA	NA	NCRNA00171	NR_026751	Body					NA				NA	6	30034945	+	NCRNA00171	ENSG00000204622.11	6	30005971	HLA-J	1	0.0139519	-2.06838
cg01044849	0.0154541	0.00292488	5.28368	1.26617e-07	0.00747854	0.00276215	2.7075	0.00677912	0.0112383	0.0020082	5.5962	2.19097e-08	0.140133	0.0112383	0.0020082	1.16511e-06	37	6	30002723	6	30110702	F			NA	NA	NCRNA00171	NR_026751	Body					NA				NA	6	30034945	+	NCRNA00171	ENSG00000237669.1	6	30006121	AL671277.2	1	0.0171691	1.2213
cg01054354	-0.0145036	0.0041301	-3.51168	0.000445279	-0.0330774	0.00479243	-6.902	5.12737e-12	-0.0224193	0.0031286	-7.16592	7.72679e-13	0.0134387	-0.0224193	0.0031286	9.79412e-11	37	15	100272751	15	98090274	R			NA	NA	LYSMD4	NM_152449	5'UTR	chr15:100272901-100273891	N_Shore			NA	15:98090274-98091679	15:100272592-100274283	Promoter_Associated	NA	15	99732545	-	LYSMD4	ENSG00000183060.15	15	99715697	LYSMD4	1	0.0518473	1.3361
cg01069141	-0.00910175	0.00257141	-3.5396	0.000400735	-0.00885464	0.00203786	-4.34507	1.39232e-05	-0.00894997	0.00159712	-5.60381	2.09688e-08	0.997168	-0.00894997	0.00159712	1.11949e-06	37	11	67398826	11	67155402	F	rs1531514		NA	NA	TBX10;NUDT8	NM_005995;NM_181843	3'UTR;TSS1500	chr11:67396844-67398294	S_Shore			NA		11:67395593-67398846	Promoter_Associated	NA	11	67631354	+	TBX10;NUDT8	ENSG00000231793.5	11	67612651	DOC2GP	1	0.0823307	-6.5438
cg01080902	-0.00880411	0.0035245	-2.49797	0.0124906	-0.0218398	0.00398543	-5.4799	4.25558e-08	-0.0145249	0.00264019	-5.50144	3.76695e-08	0.0497042	-0.0145249	0.00264019	1.90691e-06	37	19	44039870	19	48731710	F			NA	NA	ZNF575	NM_174945	3'UTR	chr19:44037297-44038286	S_Shore			NA		19:44037974-44040069	Promoter_Associated	TRUE	19	43535717	+	ZNF575	ENSG00000234465.11	19	43575801	PINLYP	1	0.0171424	0.9935
cg01080902	-0.00880411	0.0035245	-2.49797	0.0124906	-0.0218398	0.00398543	-5.4799	4.25558e-08	-0.0145249	0.00264019	-5.50144	3.76695e-08	0.0497042	-0.0145249	0.00264019	1.90691e-06	37	19	44039870	19	48731710	F			NA	NA	ZNF575	NM_174945	3'UTR	chr19:44037297-44038286	S_Shore			NA		19:44037974-44040069	Promoter_Associated	TRUE	19	43535717	+	ZNF575	ENSG00000176472.10	19	43525497	ZNF575	1	0.0317949	1.46748
cg01091099	-0.00649631	0.00337025	-1.92755	0.0539114	-0.0215585	0.00364342	-5.9171	3.27663e-09	-0.0134416	0.00247407	-5.43301	5.54109e-08	0.0100021	-0.0134416	0.00247407	2.70893e-06	37	2	54815680	2	54669184	F			NA	NA	SPTBN1;SPTBN1	NM_178313;NM_003128	Body;Body					TRUE				NA	2	54588542	+	SPTBN1	ENSG00000115306.16	2	54456317	SPTBN1	1	0.0217138	-0.789881
cg01097725	0.0120231	0.00293158	4.10123	4.10951e-05	0.00938191	0.00239315	3.92032	8.8431e-05	0.0104381	0.00185387	5.63045	1.79742e-08	0.78384	0.0104381	0.00185387	9.75276e-07	37	5	140503221	5	140483405	F	rs246669		NA	NA	PCDHB4	NM_018938	1stExon	chr5:140502890-140503804	Island			NA	5:140482992-140483946			NA	5	141123638	+	PCDHB4	ENSG00000253846.2	5	141412987	PCDHGA10	1	0.0145045	1.68996
cg01108112	-0.023371	0.00268113	-8.71684	2.86077e-18	-0.0150171	0.00253112	-5.93298	2.97485e-09	-0.0189538	0.00184052	-10.2981	7.18906e-25	0.0767914	-0.0189538	0.00184052	6.54833e-22	37	9	139254189	9	138374010	R			NA	NA				chr9:139255523-139256012	N_Shore			NA				NA	9	136359736	-		ENSG00000165684.4	9	136375577	SNAPC4	1	0.0212991	-1.61698
cg01108112	-0.023371	0.00268113	-8.71684	2.86077e-18	-0.0150171	0.00253112	-5.93298	2.97485e-09	-0.0189538	0.00184052	-10.2981	7.18906e-25	0.0767914	-0.0189538	0.00184052	6.54833e-22	37	9	139254189	9	138374010	R			NA	NA				chr9:139255523-139256012	N_Shore			NA				NA	9	136359736	-		ENSG00000213221.5	9	136359480	DNLZ	1	0.102377	5.72626
cg01133215	0.0291303	0.002967	9.81811	9.40946e-23	0.00827305	0.00285365	2.89911	0.00374229	0.0182957	0.00205674	8.89547	5.81725e-19	2.66497e-06	0.0182957	0.00205674	2.0896e-16	37	6	45399681	6	45507659	F			NA	NA	RUNX2;RUNX2;RUNX2	NM_001015051;NM_001024630;NM_004348	Body;Body;Body					TRUE		6:45399581-45399731	Gene_Associated_Cell_type_specific	NA	6	45431943	+	RUNX2	ENSG00000124813.22	6	45328157	RUNX2	1	0.0181032	-1.15503
cg01139861	-0.0226134	0.0043583	-5.18858	2.11898e-07	-0.023319	0.0048033	-4.85479	1.20513e-06	-0.022932	0.00322767	-7.10483	1.20472e-12	0.9941	-0.022932	0.00322767	1.47015e-10	37	7	50343298	7	50313844	F			NA	NA	IKZF1	NM_006060	TSS1500	chr7:50342895-50343456	Island			NA	7:50313154-50315024	7:50343113-50344886	Promoter_Associated	NA	7	50303701	+	IKZF1	ENSG00000185811.18	7	50304068	IKZF1	1	0.0261553	-0.324823
cg01141413	-0.0228577	0.00274797	-8.31802	8.94454e-17	-0.0119919	0.00264863	-4.5276	5.96562e-06	-0.0172248	0.00190702	-9.03236	1.68014e-19	0.0173773	-0.0172248	0.00190702	6.64034e-17	37	4	1764152	4	1733950	F			NA	NA				chr4:1765009-1765508	N_Shore			NA				NA	4	1762424	+		ENSG00000013810.19	4	1712891	TACC3	1	0.0168369	-1.21905
cg01141413	-0.0228577	0.00274797	-8.31802	8.94454e-17	-0.0119919	0.00264863	-4.5276	5.96562e-06	-0.0172248	0.00190702	-9.03236	1.68014e-19	0.0173773	-0.0172248	0.00190702	6.64034e-17	37	4	1764152	4	1733950	F			NA	NA				chr4:1765009-1765508	N_Shore			NA				NA	4	1762424	+		ENSG00000174137.12	4	1617915	FAM53A	1	0.0168387	-1.59269
cg01148088	-0.00986442	0.00457311	-2.15705	0.031002	-0.0288294	0.00496014	-5.81222	6.16494e-09	-0.0185783	0.00336219	-5.52564	3.28282e-08	0.019235	-0.0185783	0.00336219	1.68188e-06	37	2	7057227	2	6974678	R			NA	NA	RNF144A	NM_014746	TSS1500	chr2:7057530-7058433	N_Shore			NA	2:6974604-6975854	2:7056673-7058598	Unclassified	TRUE	2	6917095	-	RNF144A	ENSG00000228203.6	2	6912277	RNF144A-AS1	1	0.0278721	0.63373
cg01188914	-0.0114835	0.00240778	-4.76932	1.84845e-06	-0.0204638	0.00255198	-8.01877	1.06809e-15	-0.0157127	0.00175132	-8.97195	2.91305e-19	0.037794	-0.0157127	0.00175132	1.10805e-16	37	22	22306263	22	20636263	R			NA	NA	PPM1F	NM_014634	5'UTR	chr22:22306554-22307402	N_Shore			NA		22:22306231-22307778	Promoter_Associated	NA	22	21951890	-	PPM1F	ENSG00000100034.14	22	21919425	PPM1F	1	0.0565178	-2.85703
cg01188914	-0.0114835	0.00240778	-4.76932	1.84845e-06	-0.0204638	0.00255198	-8.01877	1.06809e-15	-0.0157127	0.00175132	-8.97195	2.91305e-19	0.037794	-0.0157127	0.00175132	1.10805e-16	37	22	22306263	22	20636263	R			NA	NA	PPM1F	NM_014634	5'UTR	chr22:22306554-22307402	N_Shore			NA		22:22306231-22307778	Promoter_Associated	NA	22	21951890	-	PPM1F	ENSG00000100038.19	22	21957025	TOP3B	1	0.0248863	-1.5192
cg01188914	-0.0114835	0.00240778	-4.76932	1.84845e-06	-0.0204638	0.00255198	-8.01877	1.06809e-15	-0.0157127	0.00175132	-8.97195	2.91305e-19	0.037794	-0.0157127	0.00175132	1.10805e-16	37	22	22306263	22	20636263	R			NA	NA	PPM1F	NM_014634	5'UTR	chr22:22306554-22307402	N_Shore			NA		22:22306231-22307778	Promoter_Associated	NA	22	21951890	-	PPM1F	ENSG00000228050.1	22	22223187	TOP3BP1	1	0.0193167	1.62645
cg01190666	-0.0136604	0.00273117	-5.00165	5.68409e-07	-0.0176259	0.00315327	-5.58972	2.27439e-08	-0.0153602	0.00206446	-7.44029	1.00468e-13	0.636471	-0.0153602	0.00206446	1.50472e-11	37	20	62204908	20	61675352	R	rs6011905		NA	NA	PRIC285	NM_001037335	5'UTR	chr20:62205585-62205887	N_Shore			NA		20:62204147-62206115	Promoter_Associated	NA	20	63573554	-	PRIC285	ENSG00000130589.16	20	63558086	HELZ2	1	0.0462693	-3.9988
cg01196858	-0.00789179	0.00320717	-2.46067	0.0138678	-0.021502	0.00301365	-7.13486	9.68858e-13	-0.0151199	0.0021962	-6.88455	5.79686e-12	0.00837909	-0.0151199	0.0021962	6.21426e-10	37	7	30027454	7	29993979	R			NA	NA	SCRN1;SCRN1;SCRN1;SCRN1	NM_014766;NM_001145514;NM_001145513;NM_001145515	5'UTR;Body;5'UTR;5'UTR	chr7:30028518-30029822	N_Shore			NA				TRUE	7	29987837	-	SCRN1	ENSG00000136193.17	7	29920104	SCRN1	1	0.0348117	-1.76498
cg01205584	-0.0111776	0.00369872	-3.02201	0.00251105	-0.0189704	0.00364993	-5.19745	2.02037e-07	-0.0151257	0.00259797	-5.82212	5.81055e-09	0.324822	-0.0151257	0.00259797	3.48147e-07	37	1	226270724	1	224337347	R			NA	NA				chr1:226270723-226271841	Island			NA	1:224337329-224338464	1:226270482-226271884	Promoter_Associated	NA	1	226083022	-		ENSG00000163041.10	1	226061851	H3F3A	1	0.0140874	0.713818
cg01215511	-0.0287578	0.00630376	-4.56201	5.06655e-06	-0.0368592	0.00573546	-6.42655	1.30531e-10	-0.0331901	0.0042423	-7.82361	5.13288e-15	0.636473	-0.0331901	0.0042423	9.55426e-13	37	16	2975552	16	2915553	R			NA	NA	FLYWCH1;FLYWCH1	NM_020912;NM_032296	5'UTR;5'UTR					TRUE	16:2914782-2915651			NA	16	2925550	-	FLYWCH1	ENSG00000059122.16	16	2911937	FLYWCH1	1	0.0323729	-1.98579
cg01219924	0.0190823	0.00332956	5.73116	9.97467e-09	0.0194372	0.00697336	2.78735	0.00531418	0.0191482	0.00300464	6.37286	1.85533e-10	0.998946	0.0191482	0.00300464	1.49493e-08	37	17	79004947	17	76619542	F	rs78484825		NA	NA	FLJ90757	NR_026857	Body	chr17:79006584-79006835	N_Shore			NA	17:76619363-76619705			NA	17	81031146	+	FLJ90757	ENSG00000175866.15	17	81035122	BAIAP2	1	0.0202108	-2.03947
cg01220564	-0.0121662	0.00304388	-3.99693	6.41689e-05	-0.0137377	0.00280253	-4.9019	9.49118e-07	-0.0130167	0.00206174	-6.31347	2.72852e-10	0.930409	-0.0130167	0.00206174	2.13141e-08	37	7	50633119	7	50600613	R			NA	NA	DDC;DDC	NM_001082971;NM_001082971	5'UTR;1stExon			low-CpG:50600578-50600646		NA				NA	7	50565421	-	DDC	ENSG00000132436.11	7	50444128	FIGNL1	1	0.0167951	1.38177
cg01233392	-0.0246179	0.00449041	-5.48234	4.19743e-08	-0.0377251	0.00356355	-10.5864	3.4475e-26	-0.0326602	0.00279137	-11.7004	1.2686e-31	0.0732519	-0.0326602	0.00279137	4.18562e-28	37	1	85665444	1	85438032	F	rs71691813		NA	NA	SYDE2	NM_032184	Body	chr1:85665818-85667650	N_Shore			NA				NA	1	85199760	+	SYDE2	ENSG00000280099.1	1	85152487	AL603750.1	1	0.0140516	-0.722649
cg01234517	-0.00688721	0.00185425	-3.71429	0.000203773	-0.00739272	0.00141988	-5.20657	1.92368e-07	-0.00720587	0.00112733	-6.39198	1.63748e-10	0.976847	-0.00720587	0.00112733	1.3312e-08	37	7	150021553	7	149652486	F	rs2373751		NA	NA	ACTR3C;LRRC61;LRRC61	NM_001164458;NM_023942;NM_001142928	TSS1500;5'UTR;5'UTR	chr7:150019950-150020752	S_Shore			TRUE		7:150019859-150021604	Promoter_Associated	NA	7	150324463	+	ACTR3C;LRRC61	ENSG00000188707.6	7	150322639	ZBED6CL	1	0.0389192	-2.70102
cg01266287	-0.0145074	0.00258121	-5.62041	1.90509e-08	-0.0180516	0.0024852	-7.26363	3.76833e-13	-0.0163466	0.00179028	-9.13077	6.80135e-20	0.613133	-0.0163466	0.00179028	2.91854e-17	37	16	66959833	16	65517334	F			NA	NA	RRAD;RRAD	NM_004165;NM_001128850	TSS1500;TSS1500	chr16:66958733-66959655	S_Shore			NA		16:66958594-66959989	Unclassified	TRUE	16	66925929	+	RRAD	ENSG00000166592.12	16	66921679	RRAD	1	0.0328756	-1.20634
cg01269795	-0.00513771	0.00215918	-2.37947	0.0173375	-0.0131782	0.0017362	-7.59023	3.19345e-14	-0.0100208	0.00135303	-7.40619	1.29976e-13	0.0148336	-0.0100208	0.00135303	1.89505e-11	37	6	26440101	6	26548080	R			NA	TRUE	BTN3A3;BTN3A3	NM_006994;NM_197974	TSS1500;TSS1500					NA		6:26439978-26440356	Promoter_Associated_Cell_type_specific	NA	6	26439872	-	BTN3A3	ENSG00000111801.16	6	26440472	BTN3A3	1	0.0136195	1.51276
cg01269795	-0.00513771	0.00215918	-2.37947	0.0173375	-0.0131782	0.0017362	-7.59023	3.19345e-14	-0.0100208	0.00135303	-7.40619	1.29976e-13	0.0148336	-0.0100208	0.00135303	1.89505e-11	37	6	26440101	6	26548080	R			NA	TRUE	BTN3A3;BTN3A3	NM_006994;NM_197974	TSS1500;TSS1500					NA		6:26439978-26440356	Promoter_Associated_Cell_type_specific	NA	6	26439872	-	BTN3A3	ENSG00000026950.17	6	26402237	BTN3A1	1	0.0189478	2.19318
cg01275932	0.0162008	0.00278053	5.82651	5.65994e-09	0.00892448	0.00282774	3.15605	0.00159921	0.0126239	0.00198261	6.3673	1.92387e-10	0.185782	0.0126239	0.00198261	1.54429e-08	37	9	139367244	9	138487065	F			NA	NA	SEC16A	NM_014866	Body	chr9:139367185-139367409	Island			NA	9:138487007-138487230			NA	9	136472791	+	SEC16A	ENSG00000148396.18	9	136440096	SEC16A	1	0.0174865	-0.890542
cg01278041	-0.0364299	0.00671348	-5.42639	5.75055e-08	-0.0395428	0.00680222	-5.81322	6.12832e-09	-0.0379659	0.00477821	-7.94564	1.93198e-15	0.94834	-0.0379659	0.00477821	3.86239e-13	37	4	184018527	4	184255521	R			NA	NA	C4orf38	NR_024008	Body	chr4:184018830-184021379	N_Shore		RDMR	NA	4:184255454-184258400			NA	4	183097373	-	C4orf38	ENSG00000151718.16	4	183099257	WWC2	1	0.0304212	0.904257
cg01284415	-0.0177266	0.00445141	-3.98223	6.82709e-05	-0.0296658	0.00553617	-5.35853	8.39002e-08	-0.0224145	0.00346909	-6.46122	1.03861e-10	0.243574	-0.0224145	0.00346909	8.76498e-09	37	19	49457725	19	54149537	R			NA	NA	BAX;BAX;BAX;BAX;BAX	NM_138764;NM_004324;NM_138763;NM_138761;NR_027882	TSS1500;TSS1500;TSS1500;TSS1500;TSS1500	chr19:49457926-49458493	N_Shore			NA		19:49457617-49459135	Promoter_Associated	NA	19	48954467	-	BAX	ENSG00000087088.20	19	48954815	BAX	1	0.0263401	0.539792
cg01294327	-0.0311277	0.00727653	-4.27782	1.88733e-05	-0.0278621	0.00787953	-3.536	0.000406227	-0.0296246	0.00534576	-5.54169	2.9956e-08	0.954706	-0.0296246	0.00534576	1.54808e-06	37	19	2291373	19	2242373	R			NA	NA	LINGO3	NM_001101391	Body	chr19:2289895-2291904	Island		DMR	NA	19:2240853-2242893			NA	19	2291373	-	LINGO3	ENSG00000130332.15	19	2321520	LSM7	1	0.0345389	-0.646618
cg01305625	-0.0188141	0.00251284	-7.48719	7.03634e-14	-0.00897876	0.00171949	-5.22176	1.77234e-07	-0.0121154	0.00141906	-8.5376	1.37034e-17	0.00542335	-0.0121154	0.00141906	3.93282e-15	37	5	131593812	5	131621711	F			NA	TRUE	PDLIM4;PDLIM4	NM_003687;NM_001131027	Body;Body	chr5:131593039-131593813	Island			NA				TRUE	5	132258118	+	PDLIM4	ENSG00000197208.6	5	132294394	SLC22A4	1	0.0208384	-2.11113
cg01305625	-0.0188141	0.00251284	-7.48719	7.03634e-14	-0.00897876	0.00171949	-5.22176	1.77234e-07	-0.0121154	0.00141906	-8.5376	1.37034e-17	0.00542335	-0.0121154	0.00141906	3.93282e-15	37	5	131593812	5	131621711	F			NA	TRUE	PDLIM4;PDLIM4	NM_003687;NM_001131027	Body;Body	chr5:131593039-131593813	Island			NA				TRUE	5	132258118	+	PDLIM4	ENSG00000233006.7	5	132311285	MIR3936HG	1	0.015351	1.73448
cg01314574	-0.0214121	0.003565	-6.00619	1.89928e-09	-0.0125798	0.00345697	-3.63896	0.000273745	-0.0168601	0.00248176	-6.7936	1.09372e-11	0.205622	-0.0168601	0.00248176	1.1087e-09	37	21	46858801	21	45683229	R			NA	NA	COL18A1	NM_130445	Body	chr21:46859182-46860069	N_Shore			TRUE		21:46858633-46860571	Unclassified	NA	21	45438886	-	COL18A1	ENSG00000182871.15	21	45405137	COL18A1	1	0.0675695	6.02221
cg01323777	-0.0173547	0.00423906	-4.094	4.24e-05	-0.0229796	0.00455042	-5.04999	4.41828e-07	-0.0199681	0.00310171	-6.43779	1.21223e-10	0.664296	-0.0199681	0.00310171	1.00947e-08	37	17	7832943	17	7773668	R			NA	NA	KCNAB3	NM_004732	TSS200	chr17:7832532-7833164	Island			NA	17:7773262-7773982			TRUE	17	7929624	-	KCNAB3	ENSG00000170049.9	17	7921859	KCNAB3	1	0.0362722	1.03264
cg01323777	-0.0173547	0.00423906	-4.094	4.24e-05	-0.0229796	0.00455042	-5.04999	4.41828e-07	-0.0199681	0.00310171	-6.43779	1.21223e-10	0.664296	-0.0199681	0.00310171	1.00947e-08	37	17	7832943	17	7773668	R			NA	NA	KCNAB3	NM_004732	TSS200	chr17:7832532-7833164	Island			NA	17:7773262-7773982			TRUE	17	7929624	-	KCNAB3	ENSG00000170037.13	17	7932101	CNTROB	1	0.0219394	0.461142
cg01329789	-0.0172137	0.00324388	-5.30649	1.11754e-07	-0.0198653	0.00414015	-4.79821	1.60091e-06	-0.0182223	0.00255345	-7.13635	9.58406e-13	0.880658	-0.0182223	0.00255345	1.19144e-10	37	2	219157515	2	218865759	R			NA	NA	TMBIM1;PNKD	NM_022152;NM_015488	TSS1500;Body	chr2:219156977-219157380	S_Shore			NA		2:219156179-219157920	Promoter_Associated	NA	2	218292791	-	TMBIM1;PNKD	ENSG00000261338.2	2	218255319	AC021016.2	1	0.0278509	1.41899
cg01335658	-0.00762839	0.00516531	-1.47685	0.139716	-0.0230791	0.0036748	-6.28037	3.37778e-10	-0.0178868	0.00299433	-5.97356	2.32132e-09	0.0512862	-0.0178868	0.00299433	1.50089e-07	37	10	131567534	10	131457524	F	rs10829627		NA	NA								NA	10:131457262-131457615			NA	10	129769269	+		ENSG00000170430.10	10	129467190	MGMT	1	0.0517545	1.7253
cg01340991	-0.00565503	0.00279504	-2.02324	0.0430486	-0.0167434	0.00251931	-6.64601	3.01145e-11	-0.011773	0.00187133	-6.29122	3.14983e-10	0.0130137	-0.011773	0.00187133	2.43111e-08	37	6	33397233	6	33505211	R			NA	NA	SYNGAP1	NM_006772	Body	chr6:33396050-33396296	S_Shore			NA		6:33397014-33397949	Promoter_Associated	NA	6	33429455	-	SYNGAP1	ENSG00000030110.13	6	33572547	BAK1	1	0.0226783	1.5353
cg01346718	-0.0140583	0.00362407	-3.87914	0.000104827	-0.0254337	0.00409449	-6.21169	5.24178e-10	-0.0190553	0.00271375	-7.02174	2.19121e-12	0.114866	-0.0190553	0.00271375	2.54898e-10	37	22	38713874	22	37043820	R			NA	TRUE	CSNK1E;CSNK1E	NM_001894;NM_152221	5'UTR;TSS1500	chr22:38712684-38713333	S_Shore			NA	22:37042532-37043841			NA	22	38317868	-	CSNK1E	ENSG00000213923.12	22	38290691	CSNK1E	1	0.0435216	-1.03231
cg01355392	-0.0546696	0.00727924	-7.51035	5.89692e-14	-0.0520045	0.00812594	-6.39982	1.55561e-10	-0.0534831	0.00542192	-9.86425	5.94789e-23	0.970602	-0.0534831	0.00542192	4.06334e-20	37	20	62679255	20	62149699	R			NA	NA	SOX18	NM_018419	3'UTR	chr20:62679424-62680883	N_Shore			NA				NA	20	64047901	-	SOX18	ENSG00000196421.8	20	64034344	C20orf204	1	0.0260714	1.48374
cg01355392	-0.0546696	0.00727924	-7.51035	5.89692e-14	-0.0520045	0.00812594	-6.39982	1.55561e-10	-0.0534831	0.00542192	-9.86425	5.94789e-23	0.970602	-0.0534831	0.00542192	4.06334e-20	37	20	62679255	20	62149699	R			NA	NA	SOX18	NM_018419	3'UTR	chr20:62679424-62680883	N_Shore			NA				NA	20	64047901	-	SOX18	ENSG00000130590.14	20	63974116	SAMD10	1	0.0193607	0.693446
cg01362358	-0.0229117	0.00417446	-5.48855	4.05251e-08	-0.0154967	0.00419915	-3.69044	0.000223866	-0.0192261	0.00296048	-6.49424	8.34509e-11	0.456508	-0.0192261	0.00296048	7.1592e-09	37	17	58117360	17	55472142	F			NA	NA				chr17:58119752-58120428	N_Shelf			NA				NA	17	60039998	+		ENSG00000068097.14	17	60043194	HEATR6	1	0.0912553	-1.99999
cg01371631	0.00824362	0.00246999	3.33751	0.000845313	0.0106754	0.00247792	4.3082	1.64585e-05	0.0094556	0.00174934	5.40523	6.47244e-08	0.785412	0.0094556	0.00174934	3.12142e-06	37	20	57267176	20	56700582	F			NA	NA	NPEPL1	NM_024663	TSS1500	chr20:57267527-57268420	N_Shore			NA				NA	20	58692119	+	NPEPL1	ENSG00000254419.1	20	58710795	AL139349.1	1	0.0205468	1.70437
cg01371631	0.00824362	0.00246999	3.33751	0.000845313	0.0106754	0.00247792	4.3082	1.64585e-05	0.0094556	0.00174934	5.40523	6.47244e-08	0.785412	0.0094556	0.00174934	3.12142e-06	37	20	57267176	20	56700582	F			NA	NA	NPEPL1	NM_024663	TSS1500	chr20:57267527-57268420	N_Shore			NA				NA	20	58692119	+	NPEPL1	ENSG00000215440.12	20	58689131	NPEPL1	1	0.0256807	1.39766
cg01378158	-0.0144097	0.00294595	-4.89138	1.00133e-06	-0.014588	0.00302091	-4.82902	1.37209e-06	-0.0144967	0.00210911	-6.87337	6.27039e-12	0.999108	-0.0144967	0.00210911	6.68808e-10	37	16	67312308	16	65869809	R			NA	NA	PLEKHG4;PLEKHG4;PLEKHG4;PLEKHG4;PLEKHG4;PLEKHG4	NM_001129731;NM_015432;NM_001129727;NM_001129728;NM_015432;NM_001129729	TSS1500;1stExon;5'UTR;TSS1500;5'UTR;TSS1500	chr16:67312896-67313731	N_Shore			TRUE				NA	16	67278404	-	PLEKHG4	ENSG00000196155.13	16	67277510	PLEKHG4	1	0.0321917	-2.00114
cg01383082	-0.0125993	0.0043576	-2.89133	0.00383617	-0.023219	0.00485923	-4.77833	1.76754e-06	-0.0173329	0.00324419	-5.34274	9.15508e-08	0.266155	-0.0173329	0.00324419	4.2794e-06	37	8	11323474	8	11360884	F		rs76425323	NA	NA	FAM167A	NM_053279	5'UTR	chr8:11323779-11324697	N_Shore			NA				NA	8	11465964	+	FAM167A	ENSG00000164733.21	8	11842524	CTSB	1	0.0144144	0.639416
cg01383082	-0.0125993	0.0043576	-2.89133	0.00383617	-0.023219	0.00485923	-4.77833	1.76754e-06	-0.0173329	0.00324419	-5.34274	9.15508e-08	0.266155	-0.0173329	0.00324419	4.2794e-06	37	8	11323474	8	11360884	F		rs76425323	NA	NA	FAM167A	NM_053279	5'UTR	chr8:11323779-11324697	N_Shore			NA				NA	8	11465964	+	FAM167A	ENSG00000154319.16	8	11421476	FAM167A	1	0.0469674	-2.86264
cg01383082	-0.0125993	0.0043576	-2.89133	0.00383617	-0.023219	0.00485923	-4.77833	1.76754e-06	-0.0173329	0.00324419	-5.34274	9.15508e-08	0.266155	-0.0173329	0.00324419	4.2794e-06	37	8	11323474	8	11360884	F		rs76425323	NA	NA	FAM167A	NM_053279	5'UTR	chr8:11323779-11324697	N_Shore			NA				NA	8	11465964	+	FAM167A	ENSG00000154328.16	8	11769639	NEIL2	1	0.0184954	-0.754289
cg01383911	0.0204137	0.00321015	6.35911	2.02926e-10	0.0190372	0.0035241	5.402	6.59024e-08	0.0197895	0.00237317	8.33885	7.50136e-17	0.959167	0.0197895	0.00237317	1.90384e-14	37	6	30297627	6	30405606	F			NA	NA	TRIM39;TRIM39	NM_172016;NM_021253	Body;Body	chr6:30294169-30295071	S_Shelf			NA				NA	6	30329849	+	TRIM39	ENSG00000204599.14	6	30326479	TRIM39	1	0.0137859	-0.433817
cg01383911	0.0204137	0.00321015	6.35911	2.02926e-10	0.0190372	0.0035241	5.402	6.59024e-08	0.0197895	0.00237317	8.33885	7.50136e-17	0.959167	0.0197895	0.00237317	1.90384e-14	37	6	30297627	6	30405606	F			NA	NA	TRIM39;TRIM39	NM_172016;NM_021253	Body;Body	chr6:30294169-30295071	S_Shelf			NA				NA	6	30329849	+	TRIM39	ENSG00000231074.8	6	30287397	HCG18	1	0.0852209	-2.17115
cg01383911	0.0204137	0.00321015	6.35911	2.02926e-10	0.0190372	0.0035241	5.402	6.59024e-08	0.0197895	0.00237317	8.33885	7.50136e-17	0.959167	0.0197895	0.00237317	1.90384e-14	37	6	30297627	6	30405606	F			NA	NA	TRIM39;TRIM39	NM_172016;NM_021253	Body;Body	chr6:30294169-30295071	S_Shelf			NA				NA	6	30329849	+	TRIM39	ENSG00000280128.1	6	30282349	AL662795.2	1	0.0394713	1.53165
cg01385198	-0.00869564	0.00221615	-3.92376	8.71788e-05	-0.0131826	0.00309711	-4.25642	2.07727e-05	-0.0102151	0.00180227	-5.66788	1.44577e-08	0.499539	-0.0102151	0.00180227	8.00166e-07	37	11	68856225	11	68612801	F			NA	NA	TPCN2	NM_139075	3'UTR				RDMR	TRUE		11:68855179-68856886	Unclassified	NA	11	69088756	+	TPCN2	ENSG00000132740.8	11	68903842	IGHMBP2	1	0.0916098	8.13494
cg01385198	-0.00869564	0.00221615	-3.92376	8.71788e-05	-0.0131826	0.00309711	-4.25642	2.07727e-05	-0.0102151	0.00180227	-5.66788	1.44577e-08	0.499539	-0.0102151	0.00180227	8.00166e-07	37	11	68856225	11	68612801	F			NA	NA	TPCN2	NM_139075	3'UTR				RDMR	TRUE		11:68855179-68856886	Unclassified	NA	11	69088756	+	TPCN2	ENSG00000197345.13	11	68891276	MRPL21	1	0.0600698	-2.72472
cg01385198	-0.00869564	0.00221615	-3.92376	8.71788e-05	-0.0131826	0.00309711	-4.25642	2.07727e-05	-0.0102151	0.00180227	-5.66788	1.44577e-08	0.499539	-0.0102151	0.00180227	8.00166e-07	37	11	68856225	11	68612801	F			NA	NA	TPCN2	NM_139075	3'UTR				RDMR	TRUE		11:68855179-68856886	Unclassified	NA	11	69088756	+	TPCN2	ENSG00000260895.1	11	69103493	AP003071.1	1	0.0197697	-0.470153
cg01385198	-0.00869564	0.00221615	-3.92376	8.71788e-05	-0.0131826	0.00309711	-4.25642	2.07727e-05	-0.0102151	0.00180227	-5.66788	1.44577e-08	0.499539	-0.0102151	0.00180227	8.00166e-07	37	11	68856225	11	68612801	F			NA	NA	TPCN2	NM_139075	3'UTR				RDMR	TRUE		11:68855179-68856886	Unclassified	NA	11	69088756	+	TPCN2	ENSG00000250508.1	11	68870664	AP000808.1	1	0.0197631	-1.34832
cg01403948	-0.0219713	0.00510059	-4.30761	1.65027e-05	-0.0315392	0.00702029	-4.49258	7.03665e-06	-0.025277	0.00412645	-6.12561	9.03388e-10	0.544518	-0.025277	0.00412645	6.36182e-08	37	19	7661617	19	7567617	F			NA	NA	KIAA1543;KIAA1543	NM_020902;NM_001080429	Body;Body	chr19:7660572-7661594	S_Shore			NA	19:7566500-7567720	19:7660272-7661772	Unclassified	TRUE	19	7596730	+	KIAA1543	ENSG00000076826.9	19	7595902	CAMSAP3	1	0.0604569	0.901739
cg01404873	-0.0234142	0.00593843	-3.94282	8.05284e-05	-0.0260045	0.00580035	-4.48326	7.35113e-06	-0.0247398	0.00414942	-5.96222	2.4883e-09	0.952481	-0.0247398	0.00414942	1.59887e-07	37	13	50701050	13	49599051	F			NA	NA	DLEU2	NR_002612	TSS1500	chr13:50697984-50702286	Island		RDMR	NA	13:49598831-49599423			NA	13	50126913	+	DLEU2	ENSG00000274270.1	13	50125816	AL137060.1	1	0.0207367	-0.529893
cg01405445	-0.0209219	0.00588258	-3.55659	0.000375707	-0.0372041	0.00798881	-4.65702	3.20817e-06	-0.0266464	0.00473691	-5.62527	1.85218e-08	0.260087	-0.0266464	0.00473691	1.0012e-06	37	19	36246406	19	40938246	R			NA	NA	HSPB6	NM_144617	3'UTR	chr19:36246328-36247982	Island	high-CpG:40938163-40938256		NA	19:40938235-40939861	19:36246363-36247460	Unclassified_Cell_type_specific	TRUE	19	35755504	-	HSPB6	ENSG00000161265.15	19	35742464	U2AF1L4	1	0.0559352	0.881948
cg01419914	-0.0102566	0.00398849	-2.57156	0.0101243	-0.0218049	0.00410606	-5.31041	1.09379e-07	-0.0158631	0.00286095	-5.54468	2.94499e-08	0.130686	-0.0158631	0.00286095	1.52458e-06	37	17	79374691	17	76989286	R			NA	NA	BAHCC1	NM_001080519	Body	chr17:79366806-79374742	Island			NA	17:76988852-76989337			NA	17	81400890	-	BAHCC1	ENSG00000266074.8	17	81395475	BAHCC1	1	0.0236336	-1.11399
cg01419914	-0.0102566	0.00398849	-2.57156	0.0101243	-0.0218049	0.00410606	-5.31041	1.09379e-07	-0.0158631	0.00286095	-5.54468	2.94499e-08	0.130686	-0.0158631	0.00286095	1.52458e-06	37	17	79374691	17	76989286	R			NA	NA	BAHCC1	NM_001080519	Body	chr17:79366806-79374742	Island			NA	17:76988852-76989337			NA	17	81400890	-	BAHCC1	ENSG00000262877.4	17	81388126	AC110285.2	1	0.019128	-1.52934
cg01420388	-0.0110392	0.00274541	-4.02095	5.79636e-05	-0.0177791	0.00321559	-5.52902	3.22022e-08	-0.0138808	0.00208794	-6.64809	2.96918e-11	0.28069	-0.0138808	0.00208794	2.76795e-09	37	1	11714254	1	11636841	R			NA	TRUE	FBXO44;FBXO2;FBXO44;FBXO44;FBXO44	NM_183413;NM_012168;NM_033182;NM_183412;NM_001014765	TSS1500;Body;TSS1500;TSS200;TSS1500	chr1:11714217-11715304	Island			NA	1:11636835-11637880			NA	1	11654196	-	FBXO44;FBXO2	ENSG00000116661.11	1	11637018	FBXO2	1	0.218852	-8.78964
cg01420388	-0.0110392	0.00274541	-4.02095	5.79636e-05	-0.0177791	0.00321559	-5.52902	3.22022e-08	-0.0138808	0.00208794	-6.64809	2.96918e-11	0.28069	-0.0138808	0.00208794	2.76795e-09	37	1	11714254	1	11636841	R			NA	TRUE	FBXO44;FBXO2;FBXO44;FBXO44;FBXO44	NM_183413;NM_012168;NM_033182;NM_183412;NM_001014765	TSS1500;Body;TSS1500;TSS200;TSS1500	chr1:11714217-11715304	Island			NA	1:11636835-11637880			NA	1	11654196	-	FBXO44;FBXO2	ENSG00000132879.14	1	11654375	FBXO44	1	0.0176532	-1.11512
cg01428437	-0.0099923	0.00266223	-3.75335	0.000174486	-0.00929729	0.00222488	-4.17878	2.93083e-05	-0.00958309	0.0017072	-5.61335	1.98448e-08	0.980136	-0.00958309	0.0017072	1.06394e-06	37	1	1852164	1	1842024	R			NA	NA	TMEM52	NM_178545	TSS1500	chr1:1850098-1851391	S_Shore			NA				NA	1	1920724	-	TMEM52	ENSG00000231050.1	1	1891471	AL109917.1	1	0.0271309	0.765223
cg01428437	-0.0099923	0.00266223	-3.75335	0.000174486	-0.00929729	0.00222488	-4.17878	2.93083e-05	-0.00958309	0.0017072	-5.61335	1.98448e-08	0.980136	-0.00958309	0.0017072	1.06394e-06	37	1	1852164	1	1842024	R			NA	NA	TMEM52	NM_178545	TSS1500	chr1:1850098-1851391	S_Shore			NA				NA	1	1920724	-	TMEM52	ENSG00000169885.10	1	1915108	CALML6	1	0.02849	-1.26753
cg01439670	-0.0105968	0.00381663	-2.77649	0.00549494	-0.018043	0.00371179	-4.861	1.16794e-06	-0.0144236	0.00266093	-5.42052	5.94252e-08	0.376033	-0.0144236	0.00266093	2.88617e-06	37	11	76381165	11	76058813	R			NA	NA	LRRC32;LRRC32	NM_001128922;NM_005512	5'UTR;TSS200	chr11:76381449-76382295	N_Shore			NA				TRUE	11	76670120	-	LRRC32	ENSG00000236304.1	11	76657056	AP001189.1	1	0.0417418	4.6666
cg01443318	-0.0105082	0.00276082	-3.8062	0.000141119	-0.0184107	0.00303331	-6.0695	1.28308e-09	-0.0140886	0.00204174	-6.90028	5.1899e-12	0.15629	-0.0140886	0.00204174	5.62725e-10	37	16	67466260	16	66023761	R			NA	NA	HSD11B2	NM_000196	Body	chr16:67464388-67465462	S_Shore			NA		16:67465852-67466435	Unclassified_Cell_type_specific	NA	16	67432356	-	HSD11B2	ENSG00000159714.11	16	67394152	ZDHHC1	1	0.0142196	-1.66104
cg01443318	-0.0105082	0.00276082	-3.8062	0.000141119	-0.0184107	0.00303331	-6.0695	1.28308e-09	-0.0140886	0.00204174	-6.90028	5.1899e-12	0.15629	-0.0140886	0.00204174	5.62725e-10	37	16	67466260	16	66023761	R			NA	NA	HSD11B2	NM_000196	Body	chr16:67464388-67465462	S_Shore			NA		16:67465852-67466435	Unclassified_Cell_type_specific	NA	16	67432356	-	HSD11B2	ENSG00000159720.12	16	67438014	ATP6V0D1	1	0.0301845	1.23908
cg01447828	-0.0164121	0.00376251	-4.36202	1.28869e-05	-0.0375683	0.00424949	-8.84067	9.51472e-19	-0.0257091	0.00281701	-9.12638	7.08274e-20	0.000961616	-0.0257091	0.00281701	3.01893e-17	37	19	40919465	19	45611305	R			NA	NA	PRX;PRX	NM_181882;NM_020956	TSS200;TSS200					TRUE				NA	19	40413557	-	PRX	ENSG00000105227.14	19	40393768	PRX	1	0.0924786	-2.17009
cg01447828	-0.0164121	0.00376251	-4.36202	1.28869e-05	-0.0375683	0.00424949	-8.84067	9.51472e-19	-0.0257091	0.00281701	-9.12638	7.08274e-20	0.000961616	-0.0257091	0.00281701	3.01893e-17	37	19	40919465	19	45611305	R			NA	NA	PRX;PRX	NM_181882;NM_020956	TSS200;TSS200					TRUE				NA	19	40413557	-	PRX	ENSG00000197019.5	19	40421589	SERTAD1	1	0.0149946	-0.546035
cg01455178	-0.0188309	0.00333789	-5.64155	1.68522e-08	-0.0195804	0.00354959	-5.51625	3.46306e-08	-0.0191826	0.00243164	-7.88876	3.05209e-15	0.988238	-0.0191826	0.00243164	5.89274e-13	37	1	205648187	1	203914810	F			NA	NA	SLC45A3	NM_033102	5'UTR	chr1:205648975-205649903	N_Shore			TRUE				NA	1	205679058	+	SLC45A3	ENSG00000133065.11	1	205789094	SLC41A1	1	0.0197619	0.759209
cg01455178	-0.0188309	0.00333789	-5.64155	1.68522e-08	-0.0195804	0.00354959	-5.51625	3.46306e-08	-0.0191826	0.00243164	-7.88876	3.05209e-15	0.988238	-0.0191826	0.00243164	5.89274e-13	37	1	205648187	1	203914810	F			NA	NA	SLC45A3	NM_033102	5'UTR	chr1:205648975-205649903	N_Shore			TRUE				NA	1	205679058	+	SLC45A3	ENSG00000117280.13	1	205767986	RAB29	1	0.026909	0.881218
cg01455178	-0.0188309	0.00333789	-5.64155	1.68522e-08	-0.0195804	0.00354959	-5.51625	3.46306e-08	-0.0191826	0.00243164	-7.88876	3.05209e-15	0.988238	-0.0191826	0.00243164	5.89274e-13	37	1	205648187	1	203914810	F			NA	NA	SLC45A3	NM_033102	5'UTR	chr1:205648975-205649903	N_Shore			TRUE				NA	1	205679058	+	SLC45A3	ENSG00000162877.13	1	205828025	PM20D1	1	0.0513724	-2.81936
cg01478234	-0.0145919	0.00349709	-4.17258	3.01175e-05	-0.0139931	0.00306395	-4.567	4.94753e-06	-0.0142531	0.00230455	-6.18476	6.21957e-10	0.991741	-0.0142531	0.00230455	4.52295e-08	37	12	107975299	12	106499429	F			NA	NA	BTBD11;BTBD11	NM_001017523;NM_001018072	Body;Body	chr12:107974842-107975305	Island			NA	12:106498854-106499487			NA	12	107581521	+	BTBD11	ENSG00000151136.15	12	107318421	BTBD11	1	0.0492255	2.63713
cg01498832	0.0174762	0.00303555	5.7572	8.55208e-09	0.0142799	0.00312502	4.56953	4.88826e-06	0.0159245	0.0021774	7.31352	2.60225e-13	0.764033	0.0159245	0.0021774	3.5874e-11	37	17	78682934	17	76297529	R			NA	NA	RPTOR;RPTOR	NM_001163034;NM_020761	Body;Body					NA	17:76297373-76297530			NA	17	80709133	-	RPTOR	ENSG00000141564.15	17	80544819	RPTOR	1	0.0185992	-1.26678
cg01521258	-0.00737117	0.00273732	-2.69284	0.00708464	-0.0162072	0.0024857	-6.52016	7.02316e-11	-0.0122139	0.0018402	-6.63726	3.19575e-11	0.0575352	-0.0122139	0.0018402	2.9575e-09	37	1	64937528	1	64710116	R			NA	NA	CACHD1	NM_020925	Body	chr1:64935554-64936614	S_Shore			NA	1:64710039-64710117			NA	1	64471844	-	CACHD1	ENSG00000158966.15	1	64470129	CACHD1	1	0.0149609	-1.662
cg01553004	-0.0133531	0.00446218	-2.99251	0.00276693	-0.0255946	0.00425366	-6.01708	1.77591e-09	-0.0197666	0.00307887	-6.42007	1.36209e-10	0.139245	-0.0197666	0.00307887	1.124e-08	37	14	77495672	14	76565425	R			NA	NA	C14orf4	NM_024496	TSS1500	chr14:77491938-77495276	S_Shore			NA	14:76565425-76565484			NA	14	77029328	-	C14orf4	ENSG00000258819.1	14	77069180	LINC02289	1	0.0251164	-1.90812
cg01553004	-0.0133531	0.00446218	-2.99251	0.00276693	-0.0255946	0.00425366	-6.01708	1.77591e-09	-0.0197666	0.00307887	-6.42007	1.36209e-10	0.139245	-0.0197666	0.00307887	1.124e-08	37	14	77495672	14	76565425	R			NA	NA	C14orf4	NM_024496	TSS1500	chr14:77491938-77495276	S_Shore			NA	14:76565425-76565484			NA	14	77029328	-	C14orf4	ENSG00000285966.1	14	76958098	AC007686.4	1	0.0317729	-1.7389
cg01561092	-0.0185353	0.0041935	-4.42001	9.86954e-06	-0.0236132	0.00473387	-4.98814	6.09619e-07	-0.020768	0.00313899	-6.61615	3.68684e-11	0.724443	-0.020768	0.00313899	3.37204e-09	37	16	50100815	16	48658316	F			NA	NA	HEATR3	NM_182922	Body	chr16:50099720-50100534	S_Shore			TRUE		16:50099583-50100966	Promoter_Associated	NA	16	50066903	+	HEATR3	ENSG00000155393.13	16	50065970	HEATR3	1	0.339585	-4.17702
cg01565703	-0.0139943	0.00308977	-4.52924	5.91949e-06	-0.0121122	0.00315938	-3.83374	0.000126207	-0.0130742	0.00220899	-5.91864	3.2462e-09	0.913297	-0.0130742	0.00220899	2.04053e-07	37	14	103245090	14	102314843	F			NA	NA	TRAF3;TRAF3;TRAF3	NM_145726;NM_003300;NM_145725	5'UTR;5'UTR;5'UTR				RDMR	NA				NA	14	102778752	+	TRAF3	ENSG00000131323.14	14	102777476	TRAF3	1	0.0136531	-0.684012
cg01576142	-0.0136199	0.00384317	-3.54391	0.000394233	-0.0152449	0.00361633	-4.21558	2.49141e-05	-0.0144818	0.00263367	-5.49869	3.82626e-08	0.953692	-0.0144818	0.00263367	1.93427e-06	37	14	92297260	14	91367013	F			NA	NA	TC2N;TC2N;TC2N	NM_001128595;NM_001128596;NM_152332	5'UTR;5'UTR;5'UTR					TRUE		14:92297249-92297446	Unclassified_Cell_type_specific	NA	14	91830915	+	TC2N	ENSG00000165929.13	14	91779746	TC2N	1	0.0150921	-1.09632
cg01576142	-0.0136199	0.00384317	-3.54391	0.000394233	-0.0152449	0.00361633	-4.21558	2.49141e-05	-0.0144818	0.00263367	-5.49869	3.82626e-08	0.953692	-0.0144818	0.00263367	1.93427e-06	37	14	92297260	14	91367013	F			NA	NA	TC2N;TC2N;TC2N	NM_001128595;NM_001128596;NM_152332	5'UTR;5'UTR;5'UTR					TRUE		14:92297249-92297446	Unclassified_Cell_type_specific	NA	14	91830915	+	TC2N	ENSG00000140092.14	14	91869412	FBLN5	1	0.0141674	-2.38249
cg01577604	-0.011429	0.00234855	-4.86643	1.13632e-06	-0.0111459	0.00233341	-4.77664	1.78245e-06	-0.0112865	0.0016553	-6.81844	9.20328e-12	0.996349	-0.0112865	0.0016553	9.47159e-10	37	11	64109823	11	63866399	R			NA	NA	CCDC88B	NM_032251	Body	chr11:64109822-64110228	Island			TRUE	11:63866399-63866774	11:64106983-64111798	Promoter_Associated	NA	11	64342350	-	CCDC88B	ENSG00000236935.1	11	64325050	AP003774.4	1	0.0251966	2.87908
cg01577760	-0.0339758	0.00581933	-5.83844	5.26921e-09	-0.0298393	0.00662995	-4.50069	6.77336e-06	-0.0321758	0.00437356	-7.35688	1.88256e-13	0.895893	-0.0321758	0.00437356	2.66792e-11	37	11	67776123	11	67532699	F			NA	NA	ALDH3B1;ALDH3B1	NM_001161473;NM_001161473	1stExon;5'UTR					NA				NA	11	68008652	+	ALDH3B1	ENSG00000110717.13	11	68030617	NDUFS8	1	0.0344621	0.562879
cg01577760	-0.0339758	0.00581933	-5.83844	5.26921e-09	-0.0298393	0.00662995	-4.50069	6.77336e-06	-0.0321758	0.00437356	-7.35688	1.88256e-13	0.895893	-0.0321758	0.00437356	2.66792e-11	37	11	67776123	11	67532699	F			NA	NA	ALDH3B1;ALDH3B1	NM_001161473;NM_001161473	1stExon;5'UTR					NA				NA	11	68008652	+	ALDH3B1	ENSG00000110719.10	11	68039025	TCIRG1	1	0.0229419	0.628099
cg01577760	-0.0339758	0.00581933	-5.83844	5.26921e-09	-0.0298393	0.00662995	-4.50069	6.77336e-06	-0.0321758	0.00437356	-7.35688	1.88256e-13	0.895893	-0.0321758	0.00437356	2.66792e-11	37	11	67776123	11	67532699	F			NA	NA	ALDH3B1;ALDH3B1	NM_001161473;NM_001161473	1stExon;5'UTR					NA				NA	11	68008652	+	ALDH3B1	ENSG00000255031.5	11	68050740	AP002807.1	1	0.0255429	0.588041
cg01589860	-0.02017	0.00334509	-6.02974	1.64224e-09	-0.0172907	0.00278065	-6.2182	5.02892e-10	-0.0184673	0.00213833	-8.6363	5.80652e-18	0.803256	-0.0184673	0.00213833	1.77632e-15	37	11	72433836	11	72111484	F			NA	NA	ARAP1;ARAP1;ARAP1	NM_001040118;NM_001135190;NM_015242	Body;TSS1500;TSS1500	chr11:72437676-72438005	N_Shelf			NA		11:72432591-72434003	Promoter_Associated	NA	11	72722790	+	ARAP1	ENSG00000214530.9	11	72754729	STARD10	1	0.0197382	-1.44127
cg01593673	-0.0062353	0.00267552	-2.3305	0.0197799	-0.0223238	0.00294061	-7.59154	3.16123e-14	-0.0135218	0.00197898	-6.83274	8.33071e-12	0.000277919	-0.0135218	0.00197898	8.64148e-10	37	17	46648014	17	44003013	F			NA	NA	HOXB3	NM_002146	5'UTR					TRUE				NA	17	48570651	+	HOXB3	ENSG00000120093.11	17	48548870	HOXB3	1	0.0173958	1.94666
cg01614764	-0.0189228	0.00385024	-4.9147	8.89186e-07	-0.0161904	0.00401924	-4.02823	5.61974e-05	-0.0176153	0.00278036	-6.33561	2.36405e-10	0.886479	-0.0176153	0.00278036	1.86999e-08	37	7	76023325	7	75861261	F			NA	NA	SRCRB4D	NM_080744	Body	chr7:76022369-76023172	S_Shore			NA	7:75860323-75861297	7:76022102-76023479	Promoter_Associated	NA	7	76394007	+	SRCRB4D	ENSG00000146707.14	7	76609986	POMZP3	1	0.0191006	-2.38232
cg01614764	-0.0189228	0.00385024	-4.9147	8.89186e-07	-0.0161904	0.00401924	-4.02823	5.61974e-05	-0.0176153	0.00278036	-6.33561	2.36405e-10	0.886479	-0.0176153	0.00278036	1.86999e-08	37	7	76023325	7	75861261	F			NA	NA	SRCRB4D	NM_080744	Body	chr7:76022369-76023172	S_Shore			NA	7:75860323-75861297	7:76022102-76023479	Promoter_Associated	NA	7	76394007	+	SRCRB4D	ENSG00000230305.2	7	76524515	AC004980.3	1	0.0307799	0.382265
cg01614764	-0.0189228	0.00385024	-4.9147	8.89186e-07	-0.0161904	0.00401924	-4.02823	5.61974e-05	-0.0176153	0.00278036	-6.33561	2.36405e-10	0.886479	-0.0176153	0.00278036	1.86999e-08	37	7	76023325	7	75861261	F			NA	NA	SRCRB4D	NM_080744	Body	chr7:76022369-76023172	S_Shore			NA	7:75860323-75861297	7:76022102-76023479	Promoter_Associated	NA	7	76394007	+	SRCRB4D	ENSG00000243566.6	7	76510428	UPK3B	1	0.0539358	-3.29674
cg01614764	-0.0189228	0.00385024	-4.9147	8.89186e-07	-0.0161904	0.00401924	-4.02823	5.61974e-05	-0.0176153	0.00278036	-6.33561	2.36405e-10	0.886479	-0.0176153	0.00278036	1.86999e-08	37	7	76023325	7	75861261	F			NA	NA	SRCRB4D	NM_080744	Body	chr7:76022369-76023172	S_Shore			NA	7:75860323-75861297	7:76022102-76023479	Promoter_Associated	NA	7	76394007	+	SRCRB4D	ENSG00000091073.19	7	76461676	DTX2	1	0.042275	-1.37077
cg01614764	-0.0189228	0.00385024	-4.9147	8.89186e-07	-0.0161904	0.00401924	-4.02823	5.61974e-05	-0.0176153	0.00278036	-6.33561	2.36405e-10	0.886479	-0.0176153	0.00278036	1.86999e-08	37	7	76023325	7	75861261	F			NA	NA	SRCRB4D	NM_080744	Body	chr7:76022369-76023172	S_Shore			NA	7:75860323-75861297	7:76022102-76023479	Promoter_Associated	NA	7	76394007	+	SRCRB4D	ENSG00000205485.13	7	76549360	AC004980.1	1	0.0182731	-1.00042
cg01614764	-0.0189228	0.00385024	-4.9147	8.89186e-07	-0.0161904	0.00401924	-4.02823	5.61974e-05	-0.0176153	0.00278036	-6.33561	2.36405e-10	0.886479	-0.0176153	0.00278036	1.86999e-08	37	7	76023325	7	75861261	F			NA	NA	SRCRB4D	NM_080744	Body	chr7:76022369-76023172	S_Shore			NA	7:75860323-75861297	7:76022102-76023479	Promoter_Associated	NA	7	76394007	+	SRCRB4D	ENSG00000188372.15	7	76397518	ZP3	1	0.032694	-2.34984
cg01656853	-0.0139074	0.0028938	-4.80593	1.54034e-06	-0.0141463	0.00275508	-5.13461	2.82723e-07	-0.0140327	0.00199537	-7.03261	2.027e-12	0.998214	-0.0140327	0.00199537	2.36723e-10	37	19	49199172	19	53890984	F			NA	TRUE	FUT2;FUT2	NM_001097638;NM_000511	TSS200;TSS200	chr19:49199964-49200184	N_Shore			NA				NA	19	48695914	+	FUT2	ENSG00000142233.11	19	48661407	NTN5	1	0.0296972	2.07562
cg01672322	-0.0172024	0.00325675	-5.28208	1.27724e-07	-0.012924	0.00365829	-3.5328	0.000411177	-0.0153108	0.0024325	-6.29429	3.08813e-10	0.682827	-0.0153108	0.0024325	2.38845e-08	37	11	65659772	11	65416348	F	rs1151520	rs55904337	NA	NA	FOSL1	NM_005438	3'UTR	chr11:65657874-65658970	S_Shore			NA		11:65659065-65659808	NonGene_Associated	NA	11	65892300	+	FOSL1	ENSG00000172543.8	11	65879837	CTSW	1	0.0494326	-4.444
cg01673284	-0.00711776	0.00214704	-3.31514	0.000915957	-0.00980928	0.00228698	-4.28918	1.79331e-05	-0.00837866	0.00156532	-5.35267	8.66655e-08	0.692048	-0.00837866	0.00156532	4.07198e-06	37	16	4527211	16	4467212	R			NA	NA	HMOX2;HMOX2;HMOX2	NM_002134;NM_001127206;NM_001127204	5'UTR;5'UTR;5'UTR	chr16:4526295-4526927	S_Shore			NA		16:4525913-4527244	Promoter_Associated	NA	16	4477209	-	HMOX2	ENSG00000153406.13	16	4461680	NMRAL1	1	0.0791327	-2.83187
cg01676795	0.02193	0.00366615	5.98175	2.20748e-09	0.0104423	0.00408417	2.55677	0.0105649	0.0168039	0.00272821	6.15932	7.30577e-10	0.111849	0.0168039	0.00272821	5.23928e-08	37	7	75586348	7	75424284	F			NA	NA	POR	NM_000941	Body					TRUE				NA	7	75957029	+	POR	ENSG00000127948.16	7	75899200	POR	1	0.0365905	-1.15452
cg01676795	0.02193	0.00366615	5.98175	2.20748e-09	0.0104423	0.00408417	2.55677	0.0105649	0.0168039	0.00272821	6.15932	7.30577e-10	0.111849	0.0168039	0.00272821	5.23928e-08	37	7	75586348	7	75424284	F			NA	NA	POR	NM_000941	Body					TRUE				NA	7	75957029	+	POR	ENSG00000230882.1	7	76071469	AC005077.4	1	0.0229943	-0.52885
cg01681525	-0.0141917	0.00418571	-3.39051	0.000697635	-0.0229604	0.00426533	-5.38304	7.32394e-08	-0.0184935	0.0029875	-6.19028	6.0056e-10	0.340784	-0.0184935	0.0029875	4.37735e-08	37	17	79374741	17	76989336	F			NA	NA	BAHCC1	NM_001080519	Body	chr17:79366806-79374742	Island		RDMR	NA	17:76988852-76989337			NA	17	81400940	+	BAHCC1	ENSG00000266074.8	17	81395475	BAHCC1	1	0.0252471	-1.21964
cg01681525	-0.0141917	0.00418571	-3.39051	0.000697635	-0.0229604	0.00426533	-5.38304	7.32394e-08	-0.0184935	0.0029875	-6.19028	6.0056e-10	0.340784	-0.0184935	0.0029875	4.37735e-08	37	17	79374741	17	76989336	F			NA	NA	BAHCC1	NM_001080519	Body	chr17:79366806-79374742	Island		RDMR	NA	17:76988852-76989337			NA	17	81400940	+	BAHCC1	ENSG00000262877.4	17	81388126	AC110285.2	1	0.0169678	-1.52578
cg01687189	-0.0162997	0.00408681	-3.98837	6.65275e-05	-0.0325604	0.00399212	-8.15617	3.45804e-16	-0.0246206	0.00285575	-8.62144	6.61167e-18	0.0174131	-0.0246206	0.00285575	2.0061e-15	37	12	102225365	12	100749496	R			NA	NA	GNPTAB	NM_024312	TSS1500	chr12:102224262-102224614	S_Shore			NA		12:102223977-102225512	Promoter_Associated	NA	12	101831586	-	GNPTAB	ENSG00000136048.14	12	101877580	DRAM1	1	0.0229632	0.765717
cg01687189	-0.0162997	0.00408681	-3.98837	6.65275e-05	-0.0325604	0.00399212	-8.15617	3.45804e-16	-0.0246206	0.00285575	-8.62144	6.61167e-18	0.0174131	-0.0246206	0.00285575	2.0061e-15	37	12	102225365	12	100749496	R			NA	NA	GNPTAB	NM_024312	TSS1500	chr12:102224262-102224614	S_Shore			NA		12:102223977-102225512	Promoter_Associated	NA	12	101831586	-	GNPTAB	ENSG00000258230.2	12	101773114	AC063950.1	1	0.015389	0.330492
cg01687189	-0.0162997	0.00408681	-3.98837	6.65275e-05	-0.0325604	0.00399212	-8.15617	3.45804e-16	-0.0246206	0.00285575	-8.62144	6.61167e-18	0.0174131	-0.0246206	0.00285575	2.0061e-15	37	12	102225365	12	100749496	R			NA	NA	GNPTAB	NM_024312	TSS1500	chr12:102224262-102224614	S_Shore			NA		12:102223977-102225512	Promoter_Associated	NA	12	101831586	-	GNPTAB	ENSG00000111666.11	12	101696947	CHPT1	1	0.015357	-1.4011
cg01725872	-0.0145265	0.00317793	-4.57105	4.85283e-06	-0.017864	0.00326027	-5.4793	4.27007e-08	-0.0161525	0.00227569	-7.09788	1.26686e-12	0.764379	-0.0161525	0.00227569	1.54134e-10	37	22	45635600	22	44014264	F	rs61250701		NA	NA	C22orf9	NM_001009880	Body	chr22:45636070-45636606	N_Shore			NA				NA	22	45239718	+	C22orf9	ENSG00000100364.18	22	45190338	KIAA0930	1	0.0731793	-1.35735
cg01735357	-0.0288428	0.00605609	-4.7626	1.91113e-06	-0.0246573	0.00568064	-4.34059	1.42101e-05	-0.0266163	0.0041432	-6.4241	1.32655e-10	0.880698	-0.0266163	0.0041432	1.09684e-08	37	20	61732467	20	61202912	F	rs79825815		NA	NA	HAR1B;HAR1A	NR_003245;NR_003244	Body;TSS200	chr20:61733275-61734521	N_Shore			NA		20:61732447-61732896	Unclassified_Cell_type_specific	NA	20	63101114	+	HAR1B;HAR1A	ENSG00000225978.3	20	63102205	HAR1A	1	0.046455	1.31383
cg01735357	-0.0288428	0.00605609	-4.7626	1.91113e-06	-0.0246573	0.00568064	-4.34059	1.42101e-05	-0.0266163	0.0041432	-6.4241	1.32655e-10	0.880698	-0.0266163	0.0041432	1.09684e-08	37	20	61732467	20	61202912	F	rs79825815		NA	NA	HAR1B;HAR1A	NR_003245;NR_003244	Body;TSS200	chr20:61733275-61734521	N_Shore			NA		20:61732447-61732896	Unclassified_Cell_type_specific	NA	20	63101114	+	HAR1B;HAR1A	ENSG00000231133.7	20	63092256	HAR1B	1	0.0355128	0.613981
cg01741372	-0.0229102	0.0121263	-1.8893	0.0588521	-0.054543	0.0100244	-5.44103	5.29726e-08	-0.0417015	0.00772623	-5.3974	6.76148e-08	0.132497	-0.0417015	0.00772623	3.24811e-06	37	11	783889	11	773889	F			NA	NA								TRUE	11:773645-774011	11:783587-783903	Unclassified_Cell_type_specific	TRUE	11	783888	+		ENSG00000184524.6	11	787115	CEND1	1	0.0174786	0.203907
cg01741372	-0.0229102	0.0121263	-1.8893	0.0588521	-0.054543	0.0100244	-5.44103	5.29726e-08	-0.0417015	0.00772623	-5.3974	6.76148e-08	0.132497	-0.0417015	0.00772623	3.24811e-06	37	11	783889	11	773889	F			NA	NA								TRUE	11:773645-774011	11:783587-783903	Unclassified_Cell_type_specific	TRUE	11	783888	+		ENSG00000255284.1	11	777578	AP006621.3	1	0.338614	2.10364
cg01741372	-0.0229102	0.0121263	-1.8893	0.0588521	-0.054543	0.0100244	-5.44103	5.29726e-08	-0.0417015	0.00772623	-5.3974	6.76148e-08	0.132497	-0.0417015	0.00772623	3.24811e-06	37	11	783889	11	773889	F			NA	NA								TRUE	11:773645-774011	11:783587-783903	Unclassified_Cell_type_specific	TRUE	11	783888	+		ENSG00000177685.17	11	826144	CRACR2B	1	0.0429533	1.12969
cg01741372	-0.0229102	0.0121263	-1.8893	0.0588521	-0.054543	0.0100244	-5.44103	5.29726e-08	-0.0417015	0.00772623	-5.3974	6.76148e-08	0.132497	-0.0417015	0.00772623	3.24811e-06	37	11	783889	11	773889	F			NA	NA								TRUE	11:773645-774011	11:783587-783903	Unclassified_Cell_type_specific	TRUE	11	783888	+		ENSG00000274897.3	11	797511	PANO1	1	0.0162177	-0.266442
cg01741372	-0.0229102	0.0121263	-1.8893	0.0588521	-0.054543	0.0100244	-5.44103	5.29726e-08	-0.0417015	0.00772623	-5.3974	6.76148e-08	0.132497	-0.0417015	0.00772623	3.24811e-06	37	11	783889	11	773889	F			NA	NA								TRUE	11:773645-774011	11:783587-783903	Unclassified_Cell_type_specific	TRUE	11	783888	+		ENSG00000279672.1	11	779617	AP006621.5	1	0.303362	2.38563
cg01741372	-0.0229102	0.0121263	-1.8893	0.0588521	-0.054543	0.0100244	-5.44103	5.29726e-08	-0.0417015	0.00772623	-5.3974	6.76148e-08	0.132497	-0.0417015	0.00772623	3.24811e-06	37	11	783889	11	773889	F			NA	NA								TRUE	11:773645-774011	11:783587-783903	Unclassified_Cell_type_specific	TRUE	11	783888	+		ENSG00000177106.16	11	694438	EPS8L2	1	0.0497083	0.685488
cg01741372	-0.0229102	0.0121263	-1.8893	0.0588521	-0.054543	0.0100244	-5.44103	5.29726e-08	-0.0417015	0.00772623	-5.3974	6.76148e-08	0.132497	-0.0417015	0.00772623	3.24811e-06	37	11	783889	11	773889	F			NA	NA								TRUE	11:773645-774011	11:783587-783903	Unclassified_Cell_type_specific	TRUE	11	783888	+		ENSG00000177697.19	11	832887	CD151	1	0.0336205	1.19459
cg01741372	-0.0229102	0.0121263	-1.8893	0.0588521	-0.054543	0.0100244	-5.44103	5.29726e-08	-0.0417015	0.00772623	-5.3974	6.76148e-08	0.132497	-0.0417015	0.00772623	3.24811e-06	37	11	783889	11	773889	F			NA	NA								TRUE	11:773645-774011	11:783587-783903	Unclassified_Cell_type_specific	TRUE	11	783888	+		ENSG00000255142.1	11	781645	AP006621.2	1	0.0948038	0.551084
cg01741372	-0.0229102	0.0121263	-1.8893	0.0588521	-0.054543	0.0100244	-5.44103	5.29726e-08	-0.0417015	0.00772623	-5.3974	6.76148e-08	0.132497	-0.0417015	0.00772623	3.24811e-06	37	11	783889	11	773889	F			NA	NA								TRUE	11:773645-774011	11:783587-783903	Unclassified_Cell_type_specific	TRUE	11	783888	+		ENSG00000177595.18	11	799179	PIDD1	1	0.0357304	0.5144
cg01781446	-0.0125911	0.00389417	-3.23333	0.00122356	-0.0278687	0.00471241	-5.91389	3.34123e-09	-0.0187905	0.00300185	-6.25963	3.85884e-10	0.0440358	-0.0187905	0.00300185	2.92512e-08	37	17	7383488	17	7324212	F			NA	NA	AMAC1L3;ZBTB4;ZBTB4	NM_001102614;NM_020899;NM_001128833	TSS1500;5'UTR;TSS1500	chr17:7382266-7382710	S_Shore			NA		17:7381558-7383669	Promoter_Associated	NA	17	7480168	+	AMAC1L3;ZBTB4	ENSG00000170175.11	17	7445061	CHRNB1	1	0.0158143	-0.746998
cg01784928	-0.0232282	0.00385466	-6.026	1.68067e-09	-0.0162411	0.00361759	-4.48947	7.14006e-06	-0.0195132	0.00263785	-7.39737	1.38911e-13	0.417493	-0.0195132	0.00263785	2.01083e-11	37	14	77647704	14	76717457	R			NA	NA	TMEM63C	NM_020431	TSS1500	chr14:77648108-77648328	N_Shore			NA				TRUE	14	77181360	-	TMEM63C	ENSG00000165548.11	14	77116568	TMEM63C	1	0.0286481	-3.69643
cg01792532	-0.0171228	0.00320764	-5.33814	9.39067e-08	-0.0249462	0.00295777	-8.43413	3.33667e-17	-0.0213511	0.00217444	-9.81913	9.31447e-23	0.200388	-0.0213511	0.00217444	6.16468e-20	37	1	33284208	1	33056795	F	rs3737252		NA	NA	YARS;S100PBP;S100PBP	NM_003680;NM_022753;NM_001017406	TSS1500;5'UTR;5'UTR	chr1:33282675-33283906	S_Shore			NA				NA	1	32818606	+	YARS;S100PBP	ENSG00000116497.18	1	32816767	S100PBP	1	0.0173656	-0.544713
cg01845111	-0.0120387	0.0027609	-4.36044	1.29801e-05	-0.0169165	0.00256409	-6.59745	4.18277e-11	-0.0146576	0.00187882	-7.80154	6.11576e-15	0.432604	-0.0146576	0.00187882	1.12528e-12	37	20	31446967	20	30910628	R			NA	NA	EFCAB8	NM_001143967	5'UTR					NA				NA	20	32859160	-	EFCAB8	ENSG00000101367.9	20	32819954	MAPRE1	1	0.038764	-1.08863
cg01847344	-0.0114935	0.00331966	-3.46224	0.000535706	-0.0126909	0.00308119	-4.11883	3.808e-05	-0.0121367	0.00225834	-5.37419	7.69264e-08	0.965655	-0.0121367	0.00225834	3.64903e-06	37	21	45929576	21	44754004	R			NA	NA	C21orf29	NM_144991	Body	chr21:45926531-45926754	S_Shelf		CDMR	NA		21:45929549-45931151	Unclassified	TRUE	21	44509692	-	C21orf29	ENSG00000235890.2	21	44506807	TSPEAR-AS1	1	0.108624	2.27191
cg01847344	-0.0114935	0.00331966	-3.46224	0.000535706	-0.0126909	0.00308119	-4.11883	3.808e-05	-0.0121367	0.00225834	-5.37419	7.69264e-08	0.965655	-0.0121367	0.00225834	3.64903e-06	37	21	45929576	21	44754004	R			NA	NA	C21orf29	NM_144991	Body	chr21:45926531-45926754	S_Shelf		CDMR	NA		21:45929549-45931151	Unclassified	TRUE	21	44509692	-	C21orf29	ENSG00000182912.6	21	44517216	TSPEAR-AS2	1	0.0777034	2.03899
cg01847344	-0.0114935	0.00331966	-3.46224	0.000535706	-0.0126909	0.00308119	-4.11883	3.808e-05	-0.0121367	0.00225834	-5.37419	7.69264e-08	0.965655	-0.0121367	0.00225834	3.64903e-06	37	21	45929576	21	44754004	R			NA	NA	C21orf29	NM_144991	Body	chr21:45926531-45926754	S_Shelf		CDMR	NA		21:45929549-45931151	Unclassified	TRUE	21	44509692	-	C21orf29	ENSG00000228709.1	21	44485577	LINC02575	1	0.0800197	0.969974
cg01859616	-0.0223503	0.00429523	-5.20353	1.95543e-07	-0.0214945	0.00413369	-5.19983	1.99473e-07	-0.021906	0.00297843	-7.35488	1.91097e-13	0.989747	-0.021906	0.00297843	2.70387e-11	37	11	44970771	11	44927347	R			NA	NA	TP53I11;TP53I11	NM_006034;NM_001076787	5'UTR;5'UTR	chr11:44971048-44972685	N_Shore			NA		11:44970458-44971042	Unclassified	NA	11	44949219	-	TP53I11	ENSG00000175274.18	11	44885903	TP53I11	1	0.0240654	-1.06587
cg01881899	0.0145437	0.00215403	6.75185	1.45975e-11	0.00362762	0.0016001	2.26713	0.0233824	0.00750927	0.00128448	5.84616	5.03039e-09	0.000254851	0.00750927	0.00128448	3.04972e-07	37	21	43652704	21	42525773	R			NA	NA	ABCG1;ABCG1;ABCG1;ABCG1;ABCG1;ABCG1	NM_207628;NM_004915;NM_207174;NM_207627;NM_016818;NM_207629	Body;Body;Body;Body;Body;Body	chr21:43654846-43655465	N_Shelf			NA		21:43652621-43652767	Unclassified	NA	21	42232593	-	ABCG1	ENSG00000160179.18	21	42199689	ABCG1	1	0.0334335	-4.1267
cg01899089	-0.0150197	0.00360529	-4.16601	3.09971e-05	-0.0183507	0.00335002	-5.47779	4.30674e-08	-0.0168073	0.00245411	-6.84863	7.45606e-12	0.795282	-0.0168073	0.00245411	7.81059e-10	37	5	369969	5	422969	F			NA	NA	AHRR	NM_020731	Body	chr5:370185-370422	N_Shore			NA				NA	5	369853	+	AHRR	ENSG00000063438.17	5	321759	AHRR	1	0.0153368	-1.19204
cg01919885	0.0245277	0.00421142	5.8241	5.74215e-09	0.016458	0.00515768	3.19097	0.00141794	0.0212997	0.00326209	6.52945	6.60116e-11	0.47981	0.0212997	0.00326209	5.76411e-09	37	4	3365330	4	3335128	R			NA	NA	RGS12;RGS12	NM_198229;NM_002926	Body;Body	chr4:3365194-3365415	Island			NA	4:3334959-3335183			NA	4	3363602	-	RGS12	ENSG00000159788.19	4	3293028	RGS12	1	0.0202512	-0.815627
cg01959123	-0.011615	0.00399551	-2.90701	0.00364905	-0.0186407	0.00394844	-4.72102	2.3467e-06	-0.0151694	0.00280846	-5.40133	6.61479e-08	0.457424	-0.0151694	0.00280846	3.1818e-06	37	15	65197576	15	62984629	F			NA	NA				chr15:65197799-65198063	N_Shore			TRUE		15:65197353-65198294	Unclassified	TRUE	15	64905376	+		ENSG00000241839.10	15	64841883	PLEKHO2	1	0.0716768	1.06177
cg01959123	-0.011615	0.00399551	-2.90701	0.00364905	-0.0186407	0.00394844	-4.72102	2.3467e-06	-0.0151694	0.00280846	-5.40133	6.61479e-08	0.457424	-0.0151694	0.00280846	3.1818e-06	37	15	65197576	15	62984629	F			NA	NA				chr15:65197799-65198063	N_Shore			TRUE		15:65197353-65198294	Unclassified	TRUE	15	64905376	+		ENSG00000166839.17	15	64911902	ANKDD1A	1	0.242502	7.7923
cg01971181	-0.01649	0.00483179	-3.41282	0.000642943	-0.0215027	0.00423198	-5.081	3.75461e-07	-0.0193266	0.00318353	-6.07082	1.27261e-09	0.737476	-0.0193266	0.00318353	8.68195e-08	37	3	158518888	3	160001582	F			NA	NA	MFSD1;MFSD1	NM_022736;NM_001167903	TSS1500;TSS1500	chr3:158519509-158520329	N_Shore			NA		3:158518860-158519109	Unclassified_Cell_type_specific	NA	3	158801098	+	MFSD1	ENSG00000168827.14	3	158644278	GFM1	1	0.0182357	-0.498995
cg01999701	-0.0237079	0.0047573	-4.98348	6.24498e-07	-0.016008	0.00390992	-4.0942	4.23631e-05	-0.0191123	0.00302063	-6.32724	2.49578e-10	0.457594	-0.0191123	0.00302063	1.96442e-08	37	3	184456165	3	185938859	F			NA	NA								TRUE				TRUE	3	184738376	+		ENSG00000272970.1	3	184734075	AC107294.2	1	0.0184395	0.20537
cg02003183	0.0418752	0.00379125	11.0452	2.31193e-28	0.0218003	0.00445217	4.89656	9.75303e-07	0.033437	0.00288649	11.584	4.97011e-31	0.00275967	0.033437	0.00288649	1.43752e-27	37	14	103415882	14	102485635	F			NA	NA	CDC42BPB	NM_006035	Body					TRUE	14:102485602-102485692	14:103415151-103416162	Unclassified	NA	14	102949544	+	CDC42BPB	ENSG00000198752.11	14	102932380	CDC42BPB	1	0.0276327	1.11283
cg02006134	-0.0148928	0.00283652	-5.25039	1.51778e-07	-0.0146726	0.00295955	-4.95771	7.13301e-07	-0.0147874	0.00204784	-7.22098	5.16142e-13	0.998558	-0.0147874	0.00204784	6.72023e-11	37	7	963333	7	929859	R			NA	NA	ADAP1	NM_006869	Body	chr7:965987-966266	N_Shelf			TRUE	7:929576-930590			TRUE	7	923696	-	ADAP1	ENSG00000240230.6	7	898778	COX19	1	0.0250248	-0.949187
cg02006134	-0.0148928	0.00283652	-5.25039	1.51778e-07	-0.0146726	0.00295955	-4.95771	7.13301e-07	-0.0147874	0.00204784	-7.22098	5.16142e-13	0.998558	-0.0147874	0.00204784	6.72023e-11	37	7	963333	7	929859	R			NA	NA	ADAP1	NM_006869	Body	chr7:965987-966266	N_Shelf			TRUE	7:929576-930590			TRUE	7	923696	-	ADAP1	ENSG00000105963.15	7	897900	ADAP1	1	0.0234541	-1.28431
cg02014853	-0.008479	0.00335269	-2.52901	0.0114384	-0.0181367	0.00315879	-5.74166	9.37549e-09	-0.0135952	0.0022991	-5.91327	3.35377e-09	0.11104	-0.0135952	0.0022991	2.10162e-07	37	6	29595335	6	29703314	F	rs17854104		NA	NA	GABBR1;GABBR1;GABBR1	NM_021904;NM_021903;NM_001470	Body;1stExon;Body	chr6:29595298-29595795	Island			NA	6:29703294-29704753			NA	6	29627557	+	GABBR1	ENSG00000228078.1	6	29934101	HLA-U	1	0.0459366	1.52846
cg02014853	-0.008479	0.00335269	-2.52901	0.0114384	-0.0181367	0.00315879	-5.74166	9.37549e-09	-0.0135952	0.0022991	-5.91327	3.35377e-09	0.11104	-0.0135952	0.0022991	2.10162e-07	37	6	29595335	6	29703314	F	rs17854104		NA	NA	GABBR1;GABBR1;GABBR1	NM_021904;NM_021903;NM_001470	Body;1stExon;Body	chr6:29595298-29595795	Island			NA	6:29703294-29704753			NA	6	29627557	+	GABBR1	ENSG00000227262.3	6	29925983	HCG4B	1	0.0141915	-0.51067
cg02014853	-0.008479	0.00335269	-2.52901	0.0114384	-0.0181367	0.00315879	-5.74166	9.37549e-09	-0.0135952	0.0022991	-5.91327	3.35377e-09	0.11104	-0.0135952	0.0022991	2.10162e-07	37	6	29595335	6	29703314	F	rs17854104		NA	NA	GABBR1;GABBR1;GABBR1	NM_021904;NM_021903;NM_001470	Body;1stExon;Body	chr6:29595298-29595795	Island			NA	6:29703294-29704753			NA	6	29627557	+	GABBR1	ENSG00000204644.9	6	29672392	ZFP57	1	0.0219895	-4.41187
cg02014853	-0.008479	0.00335269	-2.52901	0.0114384	-0.0181367	0.00315879	-5.74166	9.37549e-09	-0.0135952	0.0022991	-5.91327	3.35377e-09	0.11104	-0.0135952	0.0022991	2.10162e-07	37	6	29595335	6	29703314	F	rs17854104		NA	NA	GABBR1;GABBR1;GABBR1	NM_021904;NM_021903;NM_001470	Body;1stExon;Body	chr6:29595298-29595795	Island			NA	6:29703294-29704753			NA	6	29627557	+	GABBR1	ENSG00000281831.1	6	29871895	AL645929.2	1	0.0383954	-1.95547
cg02024925	-0.0275949	0.00506038	-5.45314	4.94883e-08	-0.014701	0.00448477	-3.27797	0.00104555	-0.0203732	0.00335635	-6.07005	1.2787e-09	0.162324	-0.0203732	0.00335635	8.71945e-08	37	13	52773871	13	51671872	R			NA	NA				chr13:52769556-52769878	S_Shelf			NA				NA	13	52199735	-		ENSG00000102796.11	13	51767993	DHRS12	1	0.0366824	-1.3458
cg02024925	-0.0275949	0.00506038	-5.45314	4.94883e-08	-0.014701	0.00448477	-3.27797	0.00104555	-0.0203732	0.00335635	-6.07005	1.2787e-09	0.162324	-0.0203732	0.00335635	8.71945e-08	37	13	52773871	13	51671872	R			NA	NA				chr13:52769556-52769878	S_Shelf			NA				NA	13	52199735	-		ENSG00000136108.15	13	52455429	CKAP2	1	0.0168797	0.73589
cg02024925	-0.0275949	0.00506038	-5.45314	4.94883e-08	-0.014701	0.00448477	-3.27797	0.00104555	-0.0203732	0.00335635	-6.07005	1.2787e-09	0.162324	-0.0203732	0.00335635	8.71945e-08	37	13	52773871	13	51671872	R			NA	NA				chr13:52769556-52769878	S_Shelf			NA				NA	13	52199735	-		ENSG00000281106.4	13	51813347	TMEM272	1	0.0324014	-1.86721
cg02026498	-0.0228204	0.00461422	-4.94566	7.58859e-07	-0.0223154	0.00644224	-3.46392	0.000532359	-0.0226492	0.00375127	-6.03774	1.56291e-09	0.997972	-0.0226492	0.00375127	1.04621e-07	37	19	47139338	19	51831178	R			NA	NA	GNG8	NM_033258	TSS1500	chr19:47139337-47139547	Island			NA		19:47139256-47140054	Unclassified	NA	19	46636080	-	GNG8	ENSG00000279161.1	19	46636810	AC093503.3	1	0.023211	1.26346
cg02029665	-0.0194537	0.00255399	-7.61696	2.59724e-14	-0.0188299	0.00199434	-9.44165	3.66949e-21	-0.0190662	0.00157188	-12.1295	7.36607e-34	0.981643	-0.0190662	0.00157188	3.21665e-30	37	22	46441799	22	44820463	F	rs12158719		NA	NA	LOC100271722	NR_027036	TSS1500	chr22:46440393-46441019	S_Shore			NA				NA	22	46045918	+	LOC100271722	ENSG00000197182.14	22	46053869	MIRLET7BHG	1	0.015782	-2.15163
cg02056751	-0.00795745	0.00285318	-2.78898	0.00528751	-0.0255856	0.00351562	-7.27771	3.3954e-13	-0.0149576	0.0022154	-6.75166	1.46164e-11	0.000510942	-0.0149576	0.0022154	1.44611e-09	37	11	2320647	11	2277223	F			NA	NA	C11orf21;C11orf21	NR_024621;NM_001142946	Body;3'UTR					NA		11:2320408-2320808	Unclassified_Cell_type_specific	TRUE	11	2299416	+	C11orf21	ENSG00000064201.15	11	2301997	TSPAN32	1	0.0847325	-3.06085
cg02056751	-0.00795745	0.00285318	-2.78898	0.00528751	-0.0255856	0.00351562	-7.27771	3.3954e-13	-0.0149576	0.0022154	-6.75166	1.46164e-11	0.000510942	-0.0149576	0.0022154	1.44611e-09	37	11	2320647	11	2277223	F			NA	NA	C11orf21;C11orf21	NR_024621;NM_001142946	Body;3'UTR					NA		11:2320408-2320808	Unclassified_Cell_type_specific	TRUE	11	2299416	+	C11orf21	ENSG00000110651.11	11	2376177	CD81	1	0.0182931	-1.05667
cg02056751	-0.00795745	0.00285318	-2.78898	0.00528751	-0.0255856	0.00351562	-7.27771	3.3954e-13	-0.0149576	0.0022154	-6.75166	1.46164e-11	0.000510942	-0.0149576	0.0022154	1.44611e-09	37	11	2320647	11	2277223	F			NA	NA	C11orf21;C11orf21	NR_024621;NM_001142946	Body;3'UTR					NA		11:2320408-2320808	Unclassified_Cell_type_specific	TRUE	11	2299416	+	C11orf21	ENSG00000110665.11	11	2295645	C11orf21	1	0.0681326	-2.92542
cg02056751	-0.00795745	0.00285318	-2.78898	0.00528751	-0.0255856	0.00351562	-7.27771	3.3954e-13	-0.0149576	0.0022154	-6.75166	1.46164e-11	0.000510942	-0.0149576	0.0022154	1.44611e-09	37	11	2320647	11	2277223	F			NA	NA	C11orf21;C11orf21	NR_024621;NM_001142946	Body;3'UTR					NA		11:2320408-2320808	Unclassified_Cell_type_specific	TRUE	11	2299416	+	C11orf21	ENSG00000183734.4	11	2268495	ASCL2	1	0.047153	-3.43571
cg02083676	0.0188231	0.00360162	5.2263	1.72936e-07	0.0194923	0.00344973	5.65038	1.60095e-08	0.0191721	0.00249129	7.69565	1.4078e-14	0.991039	0.0191721	0.00249129	2.4333e-12	37	3	127311156	3	128793846	R			NA	NA				chr3:127308568-127310132	S_Shore			NA	3:128793841-128793882			NA	3	127592312	-		ENSG00000163870.15	3	127571266	TPRA1	1	0.0434076	1.47543
cg02084118	0.0178313	0.00343612	5.18938	2.10997e-07	0.0147301	0.00357759	4.11732	3.83296e-05	0.0163432	0.00247821	6.59478	4.25882e-11	0.822478	0.0163432	0.00247821	3.84622e-09	37	7	971027	7	937553	F			NA	NA	ADAP1	NM_006869	Body	chr7:973189-973888	N_Shelf			NA	7:937524-937755			NA	7	931390	+	ADAP1	ENSG00000105963.15	7	897900	ADAP1	1	0.0246015	-0.95065
cg02084118	0.0178313	0.00343612	5.18938	2.10997e-07	0.0147301	0.00357759	4.11732	3.83296e-05	0.0163432	0.00247821	6.59478	4.25882e-11	0.822478	0.0163432	0.00247821	3.84622e-09	37	7	971027	7	937553	F			NA	NA	ADAP1	NM_006869	Body	chr7:973189-973888	N_Shelf			NA	7:937524-937755			NA	7	931390	+	ADAP1	ENSG00000240230.6	7	898778	COX19	1	0.026122	-0.700889
cg02084118	0.0178313	0.00343612	5.18938	2.10997e-07	0.0147301	0.00357759	4.11732	3.83296e-05	0.0163432	0.00247821	6.59478	4.25882e-11	0.822478	0.0163432	0.00247821	3.84622e-09	37	7	971027	7	937553	F			NA	NA	ADAP1	NM_006869	Body	chr7:973189-973888	N_Shelf			NA	7:937524-937755			NA	7	931390	+	ADAP1	ENSG00000178381.11	7	1152071	ZFAND2A	1	0.0187969	-1.17473
cg02085953	-0.0174061	0.00258038	-6.74554	1.52459e-11	-0.016831	0.00223479	-7.53138	5.02053e-14	-0.0170775	0.0016893	-10.1092	5.02994e-24	0.985912	-0.0170775	0.0016893	4.02954e-21	37	2	97202260	2	96565987	F		rs13020129	NA	NA	ARID5A	NM_212481	TSS1500	chr2:97202313-97203787	N_Shore			NA		2:97202196-97202767	Promoter_Associated	NA	2	96536522	+	ARID5A	ENSG00000196843.16	2	96536743	ARID5A	1	0.0146251	1.59185
cg02086839	0.021983	0.00360075	6.10514	1.02712e-09	0.0203554	0.00409262	4.97369	6.56901e-07	0.0212729	0.00270338	7.869	3.5749e-15	0.956403	0.0212729	0.00270338	6.80433e-13	37	8	144403439	8	144474814	R			NA	NA	TOP1MT	NM_052963	Body	chr8:144403266-144403524	Island			NA	8:144474483-144477654			NA	8	143321268	-	TOP1MT	ENSG00000184428.12	8	143304384	TOP1MT	1	0.025546	1.26229
cg02086839	0.021983	0.00360075	6.10514	1.02712e-09	0.0203554	0.00409262	4.97369	6.56901e-07	0.0212729	0.00270338	7.869	3.5749e-15	0.956403	0.0212729	0.00270338	6.80433e-13	37	8	144403439	8	144474814	R			NA	NA	TOP1MT	NM_052963	Body	chr8:144403266-144403524	Island			NA	8:144474483-144477654			NA	8	143321268	-	TOP1MT	ENSG00000254859.1	8	143541973	AC067930.3	1	0.0192045	-2.15125
cg02086839	0.021983	0.00360075	6.10514	1.02712e-09	0.0203554	0.00409262	4.97369	6.56901e-07	0.0212729	0.00270338	7.869	3.5749e-15	0.956403	0.0212729	0.00270338	6.80433e-13	37	8	144403439	8	144474814	R			NA	NA	TOP1MT	NM_052963	Body	chr8:144403266-144403524	Island			NA	8:144474483-144477654			NA	8	143321268	-	TOP1MT	ENSG00000253716.5	8	143280161	MINCR	1	0.0908544	2.73358
cg02086839	0.021983	0.00360075	6.10514	1.02712e-09	0.0203554	0.00409262	4.97369	6.56901e-07	0.0212729	0.00270338	7.869	3.5749e-15	0.956403	0.0212729	0.00270338	6.80433e-13	37	8	144403439	8	144474814	R			NA	NA	TOP1MT	NM_052963	Body	chr8:144403266-144403524	Island			NA	8:144474483-144477654			NA	8	143321268	-	TOP1MT	ENSG00000185730.7	8	143289676	ZNF696	1	0.0156836	-1.09173
cg02127172	-0.00970734	0.00245337	-3.95674	7.59805e-05	-0.0187245	0.00234508	-7.98461	1.40966e-15	-0.0144193	0.00169521	-8.50592	1.80163e-17	0.0293176	-0.0144193	0.00169521	5.06615e-15	37	16	3629620	16	3569621	R			NA	NA								TRUE		16:3628217-3629698	Unclassified_Cell_type_specific	TRUE	16	3579618	-		ENSG00000103351.13	16	3500976	CLUAP1	1	0.0312469	2.49882
cg02133624	-0.0129824	0.00363142	-3.57503	0.000350193	-0.0226657	0.00367454	-6.16832	6.90212e-10	-0.0177669	0.00258291	-6.87864	6.04268e-12	0.172626	-0.0177669	0.00258291	6.45913e-10	37	3	195590041	3	197074438	R			NA	NA								NA	3:197074391-197074464	3:195589066-195590581	Unclassified	NA	3	195863169	-		ENSG00000283426.1	3	195701618	SMBD1P	1	0.0669278	-2.35531
cg02133624	-0.0129824	0.00363142	-3.57503	0.000350193	-0.0226657	0.00367454	-6.16832	6.90212e-10	-0.0177669	0.00258291	-6.87864	6.04268e-12	0.172626	-0.0177669	0.00258291	6.45913e-10	37	3	195590041	3	197074438	R			NA	NA								NA	3:197074391-197074464	3:195589066-195590581	Unclassified	NA	3	195863169	-		ENSG00000215837.7	3	195658096	SDHAP2	1	0.0508782	-3.1735
cg02133624	-0.0129824	0.00363142	-3.57503	0.000350193	-0.0226657	0.00367454	-6.16832	6.90212e-10	-0.0177669	0.00258291	-6.87864	6.04268e-12	0.172626	-0.0177669	0.00258291	6.45913e-10	37	3	195590041	3	197074438	R			NA	NA								NA	3:197074391-197074464	3:195589066-195590581	Unclassified	NA	3	195863169	-		ENSG00000224769.1	3	195614947	MUC20P1	1	0.0349474	-2.52035
cg02133624	-0.0129824	0.00363142	-3.57503	0.000350193	-0.0226657	0.00367454	-6.16832	6.90212e-10	-0.0177669	0.00258291	-6.87864	6.04268e-12	0.172626	-0.0177669	0.00258291	6.45913e-10	37	3	195590041	3	197074438	R			NA	NA								NA	3:197074391-197074464	3:195589066-195590581	Unclassified	NA	3	195863169	-		ENSG00000185485.14	3	195959748	SDHAP1	1	0.0169509	-1.04892
cg02149965	-0.0217436	0.00356021	-6.1074	1.0127e-09	-0.0204445	0.00251065	-8.14313	3.85187e-16	-0.020876	0.00205178	-10.1746	2.57528e-24	0.956513	-0.020876	0.00205178	2.15616e-21	37	6	30883203	6	30991182	F			NA	NA	VARS2;VARS2;VARS2	NM_020442;NM_001167733;NM_001167734	Body;5'UTR;Body	chr6:30881533-30882296	S_Shore			TRUE		6:30883023-30883686	Promoter_Associated	NA	6	30915425	+	VARS2	ENSG00000196260.5	6	30931353	SFTA2	1	0.0245804	-0.150965
cg02149965	-0.0217436	0.00356021	-6.1074	1.0127e-09	-0.0204445	0.00251065	-8.14313	3.85187e-16	-0.020876	0.00205178	-10.1746	2.57528e-24	0.956513	-0.020876	0.00205178	2.15616e-21	37	6	30883203	6	30991182	F			NA	NA	VARS2;VARS2;VARS2	NM_020442;NM_001167733;NM_001167734	Body;5'UTR;Body	chr6:30881533-30882296	S_Shore			TRUE		6:30883023-30883686	Promoter_Associated	NA	6	30915425	+	VARS2	ENSG00000204528.3	6	31173735	PSORS1C3	1	0.0174416	-0.788475
cg02149965	-0.0217436	0.00356021	-6.1074	1.0127e-09	-0.0204445	0.00251065	-8.14313	3.85187e-16	-0.020876	0.00205178	-10.1746	2.57528e-24	0.956513	-0.020876	0.00205178	2.15616e-21	37	6	30883203	6	30991182	F			NA	NA	VARS2;VARS2;VARS2	NM_020442;NM_001167733;NM_001167734	Body;5'UTR;Body	chr6:30881533-30882296	S_Shore			TRUE		6:30883023-30883686	Promoter_Associated	NA	6	30915425	+	VARS2	ENSG00000137411.17	6	30908242	VARS2	1	0.157285	-3.19169
cg02154074	-0.0144459	0.00304633	-4.74208	2.11534e-06	-0.0113764	0.00222169	-5.12061	3.04544e-07	-0.0124422	0.00179503	-6.93147	4.16497e-12	0.717928	-0.0124422	0.00179503	4.60794e-10	37	2	74756234	2	74609742	F		rs73949680	NA	TRUE	HTRA2;HTRA2;AUP1	NM_013247;NM_145074;NM_181575	TSS1500;TSS1500;Body	chr2:74756223-74757930	Island			NA	2:74609732-74611421			NA	2	74529106	+	HTRA2;AUP1	ENSG00000272183.1	2	74501717	AC005041.3	1	0.0299442	-1.28316
cg02154074	-0.0144459	0.00304633	-4.74208	2.11534e-06	-0.0113764	0.00222169	-5.12061	3.04544e-07	-0.0124422	0.00179503	-6.93147	4.16497e-12	0.717928	-0.0124422	0.00179503	4.60794e-10	37	2	74756234	2	74609742	F		rs73949680	NA	TRUE	HTRA2;HTRA2;AUP1	NM_013247;NM_145074;NM_181575	TSS1500;TSS1500;Body	chr2:74756223-74757930	Island			NA	2:74609732-74611421			NA	2	74529106	+	HTRA2;AUP1	ENSG00000135637.13	2	74471986	CCDC142	1	0.0204851	0.932411
cg02154074	-0.0144459	0.00304633	-4.74208	2.11534e-06	-0.0113764	0.00222169	-5.12061	3.04544e-07	-0.0124422	0.00179503	-6.93147	4.16497e-12	0.717928	-0.0124422	0.00179503	4.60794e-10	37	2	74756234	2	74609742	F		rs73949680	NA	TRUE	HTRA2;HTRA2;AUP1	NM_013247;NM_145074;NM_181575	TSS1500;TSS1500;Body	chr2:74756223-74757930	Island			NA	2:74609732-74611421			NA	2	74529106	+	HTRA2;AUP1	ENSG00000204822.7	2	74471982	MRPL53	1	0.0212262	1.18208
cg02154074	-0.0144459	0.00304633	-4.74208	2.11534e-06	-0.0113764	0.00222169	-5.12061	3.04544e-07	-0.0124422	0.00179503	-6.93147	4.16497e-12	0.717928	-0.0124422	0.00179503	4.60794e-10	37	2	74756234	2	74609742	F		rs73949680	NA	TRUE	HTRA2;HTRA2;AUP1	NM_013247;NM_145074;NM_181575	TSS1500;TSS1500;Body	chr2:74756223-74757930	Island			NA	2:74609732-74611421			NA	2	74529106	+	HTRA2;AUP1	ENSG00000257702.3	2	74502595	LBX2-AS1	1	0.0458612	-2.58961
cg02156692	-0.0283343	0.00509804	-5.55789	2.73056e-08	-0.0125862	0.00527592	-2.38559	0.0170516	-0.0207302	0.00366613	-5.65452	1.56279e-08	0.0998804	-0.0207302	0.00366613	8.58531e-07	37	7	2749751	7	2716277	R		rs76189302	NA	NA	AMZ1	NM_133463	Body					NA	7:2715993-2716290	7:2749228-2750309	Promoter_Associated	TRUE	7	2710116	-	AMZ1	ENSG00000146535.14	7	2728105	GNA12	1	0.0173573	-0.866169
cg02188818	-0.0191522	0.00405253	-4.72599	2.28996e-06	-0.0211574	0.00424457	-4.98457	6.20984e-07	-0.0201084	0.00293111	-6.86034	6.86983e-12	0.943299	-0.0201084	0.00293111	7.25793e-10	37	4	141676849	4	141896299	F			NA	NA	TBC1D9	NM_015130	Body	chr4:141676920-141678170	N_Shore			NA				TRUE	4	140755694	+	TBC1D9	ENSG00000109436.8	4	140620782	TBC1D9	1	0.0154451	-0.932217
cg02246725	-0.0259677	0.00370502	-7.00879	2.40389e-12	-0.0278198	0.00437303	-6.36168	1.99555e-10	-0.0267416	0.00282684	-9.4599	3.08237e-21	0.949129	-0.0267416	0.00282684	1.61904e-18	37	11	2014127	11	1970703	F			NA	NA				chr11:2013333-2013617	S_Shore			NA		11:2013889-2015034	Unclassified_Cell_type_specific	NA	11	1992896	+		ENSG00000214026.11	11	1947278	MRPL23	1	0.0297229	3.09496
cg02257517	-0.0188183	0.00305512	-6.15959	7.29328e-10	-0.0174647	0.00295527	-5.90967	3.42798e-09	-0.018119	0.00212412	-8.53014	1.46168e-17	0.950558	-0.018119	0.00212412	4.17077e-15	37	9	136340262	9	135330083	F			NA	NA	SLC2A6;SLC2A6	NM_001145099;NM_017585	Body;Body	chr9:136340048-136340263	Island			NA	9:135329955-135330084			NA	9	133475139	+	SLC2A6	ENSG00000148290.10	9	133351758	SURF1	1	0.0140038	-0.635713
cg02286380	0.0231954	0.00375602	6.17552	6.59462e-10	0.0144598	0.00327673	4.41287	1.02008e-05	0.018235	0.00246918	7.38505	1.52393e-13	0.215296	0.018235	0.00246918	2.18822e-11	37	17	4621205	17	4567954	F			NA	NA	ARRB2;ARRB2	NM_004313;NM_199004	Body;Body					NA	17:4567954-4568012			NA	17	4717909	+	ARRB2	ENSG00000161905.12	17	4630902	ALOX15	1	0.134675	8.19935
cg02286380	0.0231954	0.00375602	6.17552	6.59462e-10	0.0144598	0.00327673	4.41287	1.02008e-05	0.018235	0.00246918	7.38505	1.52393e-13	0.215296	0.018235	0.00246918	2.18822e-11	37	17	4621205	17	4567954	F			NA	NA	ARRB2;ARRB2	NM_004313;NM_199004	Body;Body					NA	17:4567954-4568012			NA	17	4717909	+	ARRB2	ENSG00000141480.18	17	4710596	ARRB2	1	0.0782875	-0.931789
cg02295216	-0.0135231	0.00350468	-3.85857	0.000114052	-0.0207464	0.0050773	-4.0861	4.3868e-05	-0.0158541	0.00288428	-5.49672	3.86914e-08	0.503879	-0.0158541	0.00288428	1.95285e-06	37	16	66585210	16	65142711	R			NA	NA	CKLF;CKLF;CKLF;CKLF;TK2;CKLF	NM_181640;NM_016326;NM_001040138;NM_181641;NM_004614;NM_016951	TSS1500;TSS1500;TSS1500;TSS1500;TSS1500;TSS1500	chr16:66586268-66586719	N_Shore			NA		16:66585126-66587021	Unclassified	NA	16	66551306	-	CKLF;TK2	ENSG00000261656.5	16	66469796	BEAN1-AS1	1	0.13887	-4.0696
cg02295216	-0.0135231	0.00350468	-3.85857	0.000114052	-0.0207464	0.0050773	-4.0861	4.3868e-05	-0.0158541	0.00288428	-5.49672	3.86914e-08	0.503879	-0.0158541	0.00288428	1.95285e-06	37	16	66585210	16	65142711	R			NA	NA	CKLF;CKLF;CKLF;CKLF;TK2;CKLF	NM_181640;NM_016326;NM_001040138;NM_181641;NM_004614;NM_016951	TSS1500;TSS1500;TSS1500;TSS1500;TSS1500;TSS1500	chr16:66586268-66586719	N_Shore			NA		16:66585126-66587021	Unclassified	NA	16	66551306	-	CKLF;TK2	ENSG00000166548.15	16	66508003	TK2	1	0.138804	-2.26696
cg02302858	0.0193319	0.00375465	5.14879	2.62165e-07	0.017544	0.00437044	4.01424	5.96371e-05	0.0185727	0.00284798	6.52135	6.96797e-11	0.952996	0.0185727	0.00284798	6.06065e-09	37	22	46638155	22	45016819	F	rs45552534	rs1055658	NA	NA	PPARA;PPARA	NM_001001928;NM_005036	3'UTR;3'UTR					NA				NA	22	46242257	+	PPARA	ENSG00000205643.11	22	46244011	CDPF1	1	0.0169078	-0.774513
cg02302858	0.0193319	0.00375465	5.14879	2.62165e-07	0.017544	0.00437044	4.01424	5.96371e-05	0.0185727	0.00284798	6.52135	6.96797e-11	0.952996	0.0185727	0.00284798	6.06065e-09	37	22	46638155	22	45016819	F	rs45552534	rs1055658	NA	NA	PPARA;PPARA	NM_001001928;NM_005036	3'UTR;3'UTR					NA				NA	22	46242257	+	PPARA	ENSG00000277232.2	22	46295143	GTSE1-DT	1	0.0149218	0.925687
cg02316713	-0.0121629	0.00366169	-3.32167	0.0008948	-0.0243546	0.00463735	-5.25183	1.50599e-07	-0.016845	0.00287381	-5.86156	4.58546e-09	0.118997	-0.016845	0.00287381	2.80325e-07	37	21	43619559	21	42492628	F	rs1893590		NA	NA	ABCG1;ABCG1	NM_207628;NM_207627	TSS1500;TSS1500					TRUE		21:43619302-43619893	Unclassified_Cell_type_specific	NA	21	42199448	+	ABCG1	ENSG00000160179.18	21	42199689	ABCG1	1	0.0141077	-1.36523
cg02319782	-0.0128841	0.00293811	-4.38516	1.15903e-05	-0.0202352	0.00313994	-6.44445	1.16019e-10	-0.0163158	0.00214536	-7.60514	2.8459e-14	0.231962	-0.0163158	0.00214536	4.64498e-12	37	12	291668	12	161929	F	rs78240398		NA	NA								TRUE				TRUE	12	182501	+		ENSG00000256948.1	12	106524	AC026369.3	1	0.0191953	-0.878538
cg02324920	-0.0146661	0.0033036	-4.43942	9.02033e-06	-0.0201035	0.00271845	-7.39522	1.41177e-13	-0.0179082	0.00209913	-8.53126	1.44765e-17	0.445906	-0.0179082	0.00209913	4.13604e-15	37	10	105253152	10	105243142	R			NA	TRUE	NEURL	NM_004210	TSS1500	chr10:105253191-105254428	N_Shore			NA		10:105253057-105254512	Unclassified	TRUE	10	103493394	-	NEURL	ENSG00000138172.11	10	103446786	CALHM2	1	0.0176146	1.16097
cg02341571	0.0196202	0.00373621	5.25138	1.50964e-07	0.0109434	0.00361396	3.02809	0.00246107	0.0151375	0.0025976	5.82751	5.62592e-09	0.248282	0.0151375	0.0025976	3.37879e-07	37	15	44968935	15	42756227	F			NA	NA	PATL2	NM_001145112	5'UTR					NA				NA	15	44676736	+	PATL2	ENSG00000104133.15	15	44562696	SPG11	1	0.0151224	-0.546149
cg02341571	0.0196202	0.00373621	5.25138	1.50964e-07	0.0109434	0.00361396	3.02809	0.00246107	0.0151375	0.0025976	5.82751	5.62592e-09	0.248282	0.0151375	0.0025976	3.37879e-07	37	15	44968935	15	42756227	F			NA	NA	PATL2	NM_001145112	5'UTR					NA				NA	15	44676736	+	PATL2	ENSG00000229474.6	15	44665732	PATL2	1	0.0389557	-2.47261
cg02345399	-0.0109624	0.00349202	-3.13929	0.0016936	-0.0212004	0.0039964	-5.30487	1.12751e-07	-0.015395	0.00262959	-5.85452	4.78403e-09	0.15556	-0.015395	0.00262959	2.91464e-07	37	11	65195039	11	64951615	F			NA	NA				chr11:65190824-65191058	S_Shelf	low-CpG:64951457-64951665		NA		11:65194498-65195147	Promoter_Associated	NA	11	65427567	+		ENSG00000162241.12	11	65375192	SLC25A45	1	0.018209	-0.719815
cg02345399	-0.0109624	0.00349202	-3.13929	0.0016936	-0.0212004	0.0039964	-5.30487	1.12751e-07	-0.015395	0.00262959	-5.85452	4.78403e-09	0.15556	-0.015395	0.00262959	2.91464e-07	37	11	65195039	11	64951615	F			NA	NA				chr11:65190824-65191058	S_Shelf	low-CpG:64951457-64951665		NA		11:65194498-65195147	Promoter_Associated	NA	11	65427567	+		ENSG00000245532.8	11	65422774	NEAT1	1	0.0224851	-1.5088
cg02345399	-0.0109624	0.00349202	-3.13929	0.0016936	-0.0212004	0.0039964	-5.30487	1.12751e-07	-0.015395	0.00262959	-5.85452	4.78403e-09	0.15556	-0.015395	0.00262959	2.91464e-07	37	11	65195039	11	64951615	F			NA	NA				chr11:65190824-65191058	S_Shelf	low-CpG:64951457-64951665		NA		11:65194498-65195147	Promoter_Associated	NA	11	65427567	+		ENSG00000277599.1	11	65423960	RF01957	1	0.0163956	-1.41152
cg02348449	0.0139376	0.00227262	6.13284	8.63223e-10	0.0104944	0.00194043	5.40831	6.36218e-08	0.0119462	0.0014757	8.09531	5.71204e-16	0.514889	0.0119462	0.0014757	1.23989e-13	37	19	58630429	19	63322241	R			NA	NA	ZSCAN18;ZSCAN18	NR_027135;NM_001145542	TSS1500;TSS1500	chr19:58629309-58630241	S_Shore			NA				NA	19	58119061	-	ZSCAN18	ENSG00000173480.11	19	57900296	ZNF417	1	0.0135279	-1.33975
cg02348449	0.0139376	0.00227262	6.13284	8.63223e-10	0.0104944	0.00194043	5.40831	6.36218e-08	0.0119462	0.0014757	8.09531	5.71204e-16	0.514889	0.0119462	0.0014757	1.23989e-13	37	19	58630429	19	63322241	R			NA	NA	ZSCAN18;ZSCAN18	NR_027135;NM_001145542	TSS1500;TSS1500	chr19:58629309-58630241	S_Shore			NA				NA	19	58119061	-	ZSCAN18	ENSG00000083814.13	19	57719751	ZNF671	1	0.0160517	-1.21435
cg02348449	0.0139376	0.00227262	6.13284	8.63223e-10	0.0104944	0.00194043	5.40831	6.36218e-08	0.0119462	0.0014757	8.09531	5.71204e-16	0.514889	0.0119462	0.0014757	1.23989e-13	37	19	58630429	19	63322241	R			NA	NA	ZSCAN18;ZSCAN18	NR_027135;NM_001145542	TSS1500;TSS1500	chr19:58629309-58630241	S_Shore			NA				NA	19	58119061	-	ZSCAN18	ENSG00000179909.15	19	57697367	ZNF154	1	0.0239997	-4.39305
cg02348449	0.0139376	0.00227262	6.13284	8.63223e-10	0.0104944	0.00194043	5.40831	6.36218e-08	0.0119462	0.0014757	8.09531	5.71204e-16	0.514889	0.0119462	0.0014757	1.23989e-13	37	19	58630429	19	63322241	R			NA	NA	ZSCAN18;ZSCAN18	NR_027135;NM_001145542	TSS1500;TSS1500	chr19:58629309-58630241	S_Shore			NA				NA	19	58119061	-	ZSCAN18	ENSG00000204519.11	19	57681969	ZNF551	1	0.0135345	-1.42097
cg02348449	0.0139376	0.00227262	6.13284	8.63223e-10	0.0104944	0.00194043	5.40831	6.36218e-08	0.0119462	0.0014757	8.09531	5.71204e-16	0.514889	0.0119462	0.0014757	1.23989e-13	37	19	58630429	19	63322241	R			NA	NA	ZSCAN18;ZSCAN18	NR_027135;NM_001145542	TSS1500;TSS1500	chr19:58629309-58630241	S_Shore			NA				NA	19	58119061	-	ZSCAN18	ENSG00000204514.10	19	57848731	ZNF814	1	0.0145103	-1.85218
cg02348449	0.0139376	0.00227262	6.13284	8.63223e-10	0.0104944	0.00194043	5.40831	6.36218e-08	0.0119462	0.0014757	8.09531	5.71204e-16	0.514889	0.0119462	0.0014757	1.23989e-13	37	19	58630429	19	63322241	R			NA	NA	ZSCAN18;ZSCAN18	NR_027135;NM_001145542	TSS1500;TSS1500	chr19:58629309-58630241	S_Shore			NA				NA	19	58119061	-	ZSCAN18	ENSG00000196724.12	19	57921884	ZNF418	1	0.033379	-4.25231
cg02348449	0.0139376	0.00227262	6.13284	8.63223e-10	0.0104944	0.00194043	5.40831	6.36218e-08	0.0119462	0.0014757	8.09531	5.71204e-16	0.514889	0.0119462	0.0014757	1.23989e-13	37	19	58630429	19	63322241	R			NA	NA	ZSCAN18;ZSCAN18	NR_027135;NM_001145542	TSS1500;TSS1500	chr19:58629309-58630241	S_Shore			NA				NA	19	58119061	-	ZSCAN18	ENSG00000121413.12	19	58083838	ZSCAN18	1	0.015903	-2.2743
cg02368812	0.0177914	0.00407292	4.36822	1.25266e-05	0.0186683	0.00561761	3.32317	0.000889998	0.0180935	0.00329744	5.48715	4.08472e-08	0.992046	0.0180935	0.00329744	2.05165e-06	37	6	3019900	6	2964899	F	rs6955		NA	NA	NQO2	NM_000904	3'UTR					NA				NA	6	3019665	+	NQO2	ENSG00000271361.1	6	3023142	HTATSF1P2	1	0.104077	-4.45057
cg02368812	0.0177914	0.00407292	4.36822	1.25266e-05	0.0186683	0.00561761	3.32317	0.000889998	0.0180935	0.00329744	5.48715	4.08472e-08	0.992046	0.0180935	0.00329744	2.05165e-06	37	6	3019900	6	2964899	F	rs6955		NA	NA	NQO2	NM_000904	3'UTR					NA				NA	6	3019665	+	NQO2	ENSG00000124588.20	6	2987987	NQO2	1	0.0295975	-1.93295
cg02368812	0.0177914	0.00407292	4.36822	1.25266e-05	0.0186683	0.00561761	3.32317	0.000889998	0.0180935	0.00329744	5.48715	4.08472e-08	0.992046	0.0180935	0.00329744	2.05165e-06	37	6	3019900	6	2964899	F	rs6955		NA	NA	NQO2	NM_000904	3'UTR					NA				NA	6	3019665	+	NQO2	ENSG00000244041.7	6	2987967	LINC01011	1	0.0267694	-0.932515
cg02368812	0.0177914	0.00407292	4.36822	1.25266e-05	0.0186683	0.00561761	3.32317	0.000889998	0.0180935	0.00329744	5.48715	4.08472e-08	0.992046	0.0180935	0.00329744	2.05165e-06	37	6	3019900	6	2964899	F	rs6955		NA	NA	NQO2	NM_000904	3'UTR					NA				NA	6	3019665	+	NQO2	ENSG00000272277.1	6	3068045	AL031963.3	1	0.018057	0.532777
cg02371935	0.0208782	0.00276735	7.54448	4.54104e-14	0.0106645	0.00320249	3.33007	0.000868245	0.0165119	0.00209389	7.88576	3.12624e-15	0.0543866	0.0165119	0.00209389	6.01766e-13	37	16	87521363	16	86078864	R	rs11866207		NA	NA	ZCCHC14	NM_015144	Body					NA	16:86078852-86078950			TRUE	16	87487756	-	ZCCHC14	ENSG00000140948.11	16	87406246	ZCCHC14	1	0.0229503	-1.59549
cg02402091	-0.0197142	0.00344192	-5.72768	1.01815e-08	-0.0148682	0.00347794	-4.27499	1.91148e-05	-0.0173164	0.00244644	-7.0782	1.46034e-12	0.61237	-0.0173164	0.00244644	1.75611e-10	37	10	114135092	10	114125082	F			NA	NA	ACSL5;ACSL5;ACSL5;ACSL5	NM_016234;NM_203380;NM_203379;NM_203380	TSS1500;1stExon;5'UTR;5'UTR			low-CpG:114124839-114125160		NA		10:114134365-114136516	Promoter_Associated	NA	10	112375333	+	ACSL5	ENSG00000023041.11	10	112424428	ZDHHC6	1	0.0143233	0.511378
cg02402091	-0.0197142	0.00344192	-5.72768	1.01815e-08	-0.0148682	0.00347794	-4.27499	1.91148e-05	-0.0173164	0.00244644	-7.0782	1.46034e-12	0.61237	-0.0173164	0.00244644	1.75611e-10	37	10	114135092	10	114125082	F			NA	NA	ACSL5;ACSL5;ACSL5;ACSL5	NM_016234;NM_203380;NM_203379;NM_203380	TSS1500;1stExon;5'UTR;5'UTR			low-CpG:114124839-114125160		NA		10:114134365-114136516	Promoter_Associated	NA	10	112375333	+	ACSL5	ENSG00000232934.7	10	112395813	AL157786.1	1	0.0342854	1.19174
cg02405476	-0.0080828	0.00272847	-2.96239	0.00305261	-0.0139766	0.00286687	-4.8752	1.08697e-06	-0.010884	0.00197644	-5.50688	3.65255e-08	0.329944	-0.010884	0.00197644	1.85298e-06	37	20	44441818	20	43875225	F			NA	NA	UBE2C;UBE2C;UBE2C;UBE2C;UBE2C;UBE2C;UBE2C;UBE2C	NM_181801;NM_181801;NM_181802;NM_181802;NM_007019;NM_181800;NM_181803;NM_181799	1stExon;5'UTR;1stExon;5'UTR;Body;Body;Body;Body	chr20:44440946-44441655	S_Shore			NA		20:44440746-44442099	Promoter_Associated	NA	20	45813178	+	UBE2C	ENSG00000101457.13	20	45791954	DNTTIP1	1	0.0182251	-1.0178
cg02405476	-0.0080828	0.00272847	-2.96239	0.00305261	-0.0139766	0.00286687	-4.8752	1.08697e-06	-0.010884	0.00197644	-5.50688	3.65255e-08	0.329944	-0.010884	0.00197644	1.85298e-06	37	20	44441818	20	43875225	F			NA	NA	UBE2C;UBE2C;UBE2C;UBE2C;UBE2C;UBE2C;UBE2C;UBE2C	NM_181801;NM_181801;NM_181802;NM_181802;NM_007019;NM_181800;NM_181803;NM_181799	1stExon;5'UTR;1stExon;5'UTR;Body;Body;Body;Body	chr20:44440946-44441655	S_Shore			NA		20:44440746-44442099	Promoter_Associated	NA	20	45813178	+	UBE2C	ENSG00000124116.19	20	45747944	WFDC3	1	0.0247498	-0.801886
cg02405476	-0.0080828	0.00272847	-2.96239	0.00305261	-0.0139766	0.00286687	-4.8752	1.08697e-06	-0.010884	0.00197644	-5.50688	3.65255e-08	0.329944	-0.010884	0.00197644	1.85298e-06	37	20	44441818	20	43875225	F			NA	NA	UBE2C;UBE2C;UBE2C;UBE2C;UBE2C;UBE2C;UBE2C;UBE2C	NM_181801;NM_181801;NM_181802;NM_181802;NM_007019;NM_181800;NM_181803;NM_181799	1stExon;5'UTR;1stExon;5'UTR;Body;Body;Body;Body	chr20:44440946-44441655	S_Shore			NA		20:44440746-44442099	Promoter_Associated	NA	20	45813178	+	UBE2C	ENSG00000101470.10	20	45823214	TNNC2	1	0.0209881	1.45495
cg02412616	-0.0223476	0.00332563	-6.71981	1.81962e-11	-0.0166133	0.0024886	-6.67577	2.45938e-11	-0.0186717	0.0019925	-9.37101	7.18403e-21	0.385607	-0.0186717	0.0019925	3.58733e-18	37	22	46422752	22	44801416	F	rs7510776		NA	NA				chr22:46423299-46423652	N_Shore			TRUE				TRUE	22	46026871	+		ENSG00000273145.1	22	46013606	BX537318.1	1	0.0174636	0.981242
cg02433266	-0.0199813	0.00406538	-4.91499	8.87874e-07	-0.0106045	0.00395301	-2.68263	0.00730467	-0.0151615	0.0028341	-5.34968	8.81106e-08	0.254802	-0.0151615	0.0028341	4.13334e-06	37	22	20226815	22	18606815	F			NA	NA				chr22:20228961-20230275	N_Shelf			NA	22:18606692-18606894	22:20225427-20226931	Unclassified	NA	22	20239291	+		ENSG00000040608.14	22	20241415	RTN4R	1	0.0247234	-0.936896
cg02441474	-0.0147413	0.00497113	-2.96538	0.0030231	-0.0268444	0.00543381	-4.94027	7.80164e-07	-0.0202557	0.0036678	-5.52258	3.34054e-08	0.259138	-0.0202557	0.0036678	1.70811e-06	37	16	89165300	16	87692801	F			NA	NA	ACSF3;ACSF3;ACSF3	NR_023316;NM_001127214;NM_174917	Body;5'UTR;5'UTR	chr16:89167116-89167482	N_Shore			NA				TRUE	16	89098891	+	ACSF3	ENSG00000176715.16	16	89088375	ACSF3	1	0.0326791	-0.492401
cg02448796	0.0219678	0.00360605	6.09194	1.11549e-09	0.00909953	0.00362356	2.51122	0.0120316	0.0155648	0.00255603	6.08946	1.13289e-09	0.0420796	0.0155648	0.00255603	7.81006e-08	37	1	6101339	1	6023926	F			NA	NA	KCNAB2;KCNAB2	NM_003636;NM_172130	Body;Body					NA	1:6023441-6024104	1:6100542-6102491	Promoter_Associated	TRUE	1	6041278	+	KCNAB2	ENSG00000069424.14	1	5991466	KCNAB2	1	0.0161002	0.769325
cg02491905	-0.0125539	0.00391758	-3.20451	0.00135293	-0.0209202	0.00455764	-4.59013	4.4296e-06	-0.0161088	0.00297089	-5.42221	5.88667e-08	0.37949	-0.0161088	0.00297089	2.86091e-06	37	2	10975305	2	10892756	F			NA	NA								NA	2:10892722-10892780	2:10974702-10976339	Unclassified	TRUE	2	10835178	+		ENSG00000271952.1	2	10878269	LINC01954	1	0.21453	-1.57349
cg02493602	-0.0219484	0.00400398	-5.48163	4.21424e-08	-0.0130695	0.00608531	-2.14771	0.0317365	-0.0192658	0.00334487	-5.7598	8.42148e-09	0.475762	-0.0192658	0.00334487	4.8785e-07	37	11	86383696	11	86061344	F	rs77769658		NA	NA	ME3;ME3;ME3	NM_001014811;NM_001161586;NM_006680	TSS1500;TSS200;TSS1500	chr11:86382695-86383586	S_Shore			NA	11:86060344-86061372			NA	11	86672653	+	ME3	ENSG00000278989.1	11	86434924	AP001148.1	1	0.018753	-0.356241
cg02493602	-0.0219484	0.00400398	-5.48163	4.21424e-08	-0.0130695	0.00608531	-2.14771	0.0317365	-0.0192658	0.00334487	-5.7598	8.42148e-09	0.475762	-0.0192658	0.00334487	4.8785e-07	37	11	86383696	11	86061344	F	rs77769658		NA	NA	ME3;ME3;ME3	NM_001014811;NM_001161586;NM_006680	TSS1500;TSS200;TSS1500	chr11:86382695-86383586	S_Shore			NA	11:86060344-86061372			NA	11	86672653	+	ME3	ENSG00000151376.16	11	86441108	ME3	1	0.0460411	-1.57615
cg02494066	-0.00703188	0.00227011	-3.0976	0.00195094	-0.014763	0.00296641	-4.97673	6.46678e-07	-0.0098873	0.00180279	-5.48446	4.14745e-08	0.117437	-0.0098873	0.00180279	2.07988e-06	37	1	983386	1	973249	F			NA	NA	AGRN	NM_198576	Body	chr1:983174-983612	Island			NA	1:973038-973468			NA	1	1048005	+	AGRN	ENSG00000188157.15	1	1020120	AGRN	1	0.022816	3.23522
cg02494066	-0.00703188	0.00227011	-3.0976	0.00195094	-0.014763	0.00296641	-4.97673	6.46678e-07	-0.0098873	0.00180279	-5.48446	4.14745e-08	0.117437	-0.0098873	0.00180279	2.07988e-06	37	1	983386	1	973249	F			NA	NA	AGRN	NM_198576	Body	chr1:983174-983612	Island			NA	1:973038-973468			NA	1	1048005	+	AGRN	ENSG00000187608.9	1	1001138	ISG15	1	0.018324	4.54006
cg02494066	-0.00703188	0.00227011	-3.0976	0.00195094	-0.014763	0.00296641	-4.97673	6.46678e-07	-0.0098873	0.00180279	-5.48446	4.14745e-08	0.117437	-0.0098873	0.00180279	2.07988e-06	37	1	983386	1	973249	F			NA	NA	AGRN	NM_198576	Body	chr1:983174-983612	Island			NA	1:973038-973468			NA	1	1048005	+	AGRN	ENSG00000272512.1	1	995966	AL645608.7	1	0.0165718	-1.48862
cg02512168	-0.0276357	0.0057695	-4.78996	1.66818e-06	-0.0295173	0.00604093	-4.88622	1.02789e-06	-0.0285333	0.00417231	-6.83872	7.99036e-12	0.974948	-0.0285333	0.00417231	8.32137e-10	37	16	3163228	16	3103229	R			NA	NA	ZNF205;MGC3771;ZNF205;MGC3771	NM_003456;NR_024167;NM_001042428;NR_024166	5'UTR;Body;5'UTR;Body				RDMR	NA				NA	16	3113226	-	ZNF205;MGC3771	ENSG00000122386.10	16	3112560	ZNF205	1	0.109247	-2.229
cg02512168	-0.0276357	0.0057695	-4.78996	1.66818e-06	-0.0295173	0.00604093	-4.88622	1.02789e-06	-0.0285333	0.00417231	-6.83872	7.99036e-12	0.974948	-0.0285333	0.00417231	8.32137e-10	37	16	3163228	16	3103229	R			NA	NA	ZNF205;MGC3771;ZNF205;MGC3771	NM_003456;NR_024167;NM_001042428;NR_024166	5'UTR;Body;5'UTR;Body				RDMR	NA				NA	16	3113226	-	ZNF205;MGC3771	ENSG00000263072.6	16	3110460	ZNF213-AS1	1	0.0381798	0.664144
cg02529919	-0.0137617	0.00314624	-4.37403	1.21974e-05	-0.0100102	0.00250921	-3.9894	6.62399e-05	-0.0114687	0.00196173	-5.84623	5.02828e-09	0.647583	-0.0114687	0.00196173	3.04927e-07	37	16	2906070	16	2846071	F			NA	NA	PRSS22	NM_022119	Body	chr16:2907574-2907836	N_Shore			NA				NA	16	2856068	+	PRSS22	ENSG00000172460.16	16	2839568	PRSS30P	1	0.0488342	4.49759
cg02529919	-0.0137617	0.00314624	-4.37403	1.21974e-05	-0.0100102	0.00250921	-3.9894	6.62399e-05	-0.0114687	0.00196173	-5.84623	5.02828e-09	0.647583	-0.0114687	0.00196173	3.04927e-07	37	16	2906070	16	2846071	F			NA	NA	PRSS22	NM_022119	Body	chr16:2907574-2907836	N_Shore			NA				NA	16	2856068	+	PRSS22	ENSG00000005001.10	16	2852730	PRSS22	1	0.0407063	1.7685
cg02540736	-0.0267359	0.00362726	-7.37082	1.69578e-13	-0.0305045	0.00407511	-7.48556	7.12407e-14	-0.0284018	0.00270942	-10.4826	1.03816e-25	0.787745	-0.0284018	0.00270942	1.14743e-22	37	14	100774063	14	99843816	R			NA	NA	SLC25A29;MIR345	NM_001039355;NR_029906	TSS1500;TSS200	chr14:100771820-100773673	S_Shore			NA				NA	14	100307725	-	SLC25A29;MIR345	ENSG00000259052.1	14	100279959	AL157871.6	1	0.0147384	-0.21504
cg02540736	-0.0267359	0.00362726	-7.37082	1.69578e-13	-0.0305045	0.00407511	-7.48556	7.12407e-14	-0.0284018	0.00270942	-10.4826	1.03816e-25	0.787745	-0.0284018	0.00270942	1.14743e-22	37	14	100774063	14	99843816	R			NA	NA	SLC25A29;MIR345	NM_001039355;NR_029906	TSS1500;TSS200	chr14:100771820-100773673	S_Shore			NA				NA	14	100307725	-	SLC25A29;MIR345	ENSG00000197119.13	14	100291116	SLC25A29	1	0.150779	-6.488
cg02544002	-0.0298726	0.00370195	-8.06944	7.06234e-16	-0.0283792	0.00323223	-8.78005	1.63408e-18	-0.0290252	0.00243478	-11.9211	9.18857e-33	0.954874	-0.0290252	0.00243478	3.52824e-29	37	3	129323778	3	130806468	F			NA	NA	PLXND1	NM_015103	Body	chr3:129323915-129325332	N_Shore			NA				NA	3	129604934	+	PLXND1	ENSG00000004399.12	3	129555175	PLXND1	1	0.0232004	-1.15914
cg02553054	-0.0139243	0.00282831	-4.92318	8.51502e-07	-0.0101701	0.0031924	-3.18571	0.00144397	-0.0122734	0.00211699	-5.79756	6.72878e-09	0.678826	-0.0122734	0.00211699	3.96969e-07	37	12	50478480	12	48764747	F			NA	NA	SMARCD1;SMARCD1	NM_003076;NM_139071	TSS1500;TSS1500	chr12:50478886-50479329	N_Shore			NA		12:50478429-50479732	Promoter_Associated	NA	12	50084696	+	SMARCD1	ENSG00000272368.2	12	50112197	AC074032.1	1	0.0144599	-0.774082
cg02553054	-0.0139243	0.00282831	-4.92318	8.51502e-07	-0.0101701	0.0031924	-3.18571	0.00144397	-0.0122734	0.00211699	-5.79756	6.72878e-09	0.678826	-0.0122734	0.00211699	3.96969e-07	37	12	50478480	12	48764747	F			NA	NA	SMARCD1;SMARCD1	NM_003076;NM_139071	TSS1500;TSS1500	chr12:50478886-50479329	N_Shore			NA		12:50478429-50479732	Promoter_Associated	NA	12	50084696	+	SMARCD1	ENSG00000066084.13	12	50504985	DIP2B	1	0.0172006	0.812459
cg02553054	-0.0139243	0.00282831	-4.92318	8.51502e-07	-0.0101701	0.0031924	-3.18571	0.00144397	-0.0122734	0.00211699	-5.79756	6.72878e-09	0.678826	-0.0122734	0.00211699	3.96969e-07	37	12	50478480	12	48764747	F			NA	NA	SMARCD1;SMARCD1	NM_003076;NM_139071	TSS1500;TSS1500	chr12:50478886-50479329	N_Shore			NA		12:50478429-50479732	Promoter_Associated	NA	12	50084696	+	SMARCD1	ENSG00000178449.9	12	50112082	COX14	1	0.0141599	0.756374
cg02553486	-0.0103161	0.00400227	-2.57757	0.00994967	-0.0344538	0.00453326	-7.60024	2.95587e-14	-0.0208892	0.00300028	-6.9624	3.34525e-12	0.000346978	-0.0208892	0.00300028	3.76271e-10	37	4	47840095	4	47534852	F			NA	TRUE	CORIN	NM_006587	TSS200	chr4:47838604-47839946	S_Shore			NA	4:47533362-47534896	4:47838141-47840153	Promoter_Associated	NA	4	47838077	+	CORIN	ENSG00000145244.12	4	47593999	CORIN	1	0.0137488	-0.77702
cg02553486	-0.0103161	0.00400227	-2.57757	0.00994967	-0.0344538	0.00453326	-7.60024	2.95587e-14	-0.0208892	0.00300028	-6.9624	3.34525e-12	0.000346978	-0.0208892	0.00300028	3.76271e-10	37	4	47840095	4	47534852	F			NA	TRUE	CORIN	NM_006587	TSS200	chr4:47838604-47839946	S_Shore			NA	4:47533362-47534896	4:47838141-47840153	Promoter_Associated	NA	4	47838077	+	CORIN	ENSG00000170448.12	4	47847233	NFXL1	1	0.0157416	-1.81372
cg02586730	-0.0116031	0.00388745	-2.98477	0.00283795	-0.0179976	0.00350974	-5.1279	2.92994e-07	-0.015126	0.00260509	-5.80633	6.38552e-09	0.474581	-0.015126	0.00260509	3.79079e-07	37	11	65639869	11	65396445	R			NA	TRUE	EFEMP2	NM_016938	5'UTR	chr11:65639835-65641374	Island			NA	11:65396445-65397912	11:65639213-65641545	Promoter_Associated	NA	11	65872397	-	EFEMP2	ENSG00000172803.18	11	65833834	SNX32	1	0.0198843	1.14097
cg02586730	-0.0116031	0.00388745	-2.98477	0.00283795	-0.0179976	0.00350974	-5.1279	2.92994e-07	-0.015126	0.00260509	-5.80633	6.38552e-09	0.474581	-0.015126	0.00260509	3.79079e-07	37	11	65639869	11	65396445	R			NA	TRUE	EFEMP2	NM_016938	5'UTR	chr11:65639835-65641374	Island			NA	11:65396445-65397912	11:65639213-65641545	Promoter_Associated	NA	11	65872397	-	EFEMP2	ENSG00000172543.8	11	65879837	CTSW	1	0.0139368	-2.17629
cg02586730	-0.0116031	0.00388745	-2.98477	0.00283795	-0.0179976	0.00350974	-5.1279	2.92994e-07	-0.015126	0.00260509	-5.80633	6.38552e-09	0.474581	-0.015126	0.00260509	3.79079e-07	37	11	65639869	11	65396445	R			NA	TRUE	EFEMP2	NM_016938	5'UTR	chr11:65639835-65641374	Island			NA	11:65396445-65397912	11:65639213-65641545	Promoter_Associated	NA	11	65872397	-	EFEMP2	ENSG00000172638.13	11	65866441	EFEMP2	1	0.0138742	-1.30194
cg02593403	-0.017442	0.0044519	-3.91788	8.93305e-05	-0.032485	0.00532132	-6.10468	1.0301e-09	-0.0236358	0.00341453	-6.92212	4.44921e-12	0.0953186	-0.0236358	0.00341453	4.8884e-10	37	10	102278918	10	102268908	F	rs12258705		NA	NA	SEC31B	NM_015490	5'UTR	chr10:102279162-102279730	N_Shore			TRUE		10:102278195-102279099	Unclassified_Cell_type_specific	TRUE	10	100519160	+	SEC31B	ENSG00000075826.17	10	100486646	SEC31B	1	0.0458125	1.24004
cg02600974	-0.0169547	0.00295567	-5.73634	9.67416e-09	-0.0141899	0.00386304	-3.67326	0.000239479	-0.0159338	0.00234739	-6.78788	1.1379e-11	0.850826	-0.0159338	0.00234739	1.14852e-09	37	9	88713706	9	87903526	R			NA	NA	GOLM1;GOLM1	NM_177937;NM_016548	5'UTR;5'UTR	chr9:88713705-88714908	Island			NA		9:88713564-88713924	Unclassified_Cell_type_specific	NA	9	86098790	-	GOLM1	ENSG00000135052.16	9	86026146	GOLM1	1	0.0230342	-1.71387
cg02625749	-0.0126206	0.00342209	-3.68798	0.000226043	-0.0187273	0.00421841	-4.43941	9.02038e-06	-0.0150443	0.00265758	-5.66089	1.50588e-08	0.531559	-0.0150443	0.00265758	8.29822e-07	37	16	75505953	16	74063454	R			NA	NA								TRUE		16:75505599-75506179	Unclassified	NA	16	75472054	-		ENSG00000261783.1	16	75379818	AC009054.2	1	0.0148207	-0.239495
cg02625749	-0.0126206	0.00342209	-3.68798	0.000226043	-0.0187273	0.00421841	-4.43941	9.02038e-06	-0.0150443	0.00265758	-5.66089	1.50588e-08	0.531559	-0.0150443	0.00265758	8.29822e-07	37	16	75505953	16	74063454	R			NA	NA								TRUE		16:75505599-75506179	Unclassified	NA	16	75472054	-		ENSG00000183196.10	16	75472052	CHST6	1	0.0158416	0.345546
cg02633767	-0.0229071	0.00377709	-6.06475	1.32156e-09	-0.0120027	0.00340789	-3.52203	0.000428258	-0.016896	0.00253023	-6.67768	2.42759e-11	0.100533	-0.016896	0.00253023	2.30405e-09	37	6	32794327	6	32902305	R			NA	NA	TAP2;TAP2	NM_000544;NM_018833	3'UTR;Body					NA				NA	6	32826549	-	TAP2	ENSG00000241106.8	6	32812763	HLA-DOB	1	0.0292133	2.89051
cg02633767	-0.0229071	0.00377709	-6.06475	1.32156e-09	-0.0120027	0.00340789	-3.52203	0.000428258	-0.016896	0.00253023	-6.67768	2.42759e-11	0.100533	-0.016896	0.00253023	2.30405e-09	37	6	32794327	6	32902305	R			NA	NA	TAP2;TAP2	NM_000544;NM_018833	3'UTR;Body					NA				NA	6	32826549	-	TAP2	ENSG00000204267.14	6	32821833	TAP2	1	0.0603958	-2.48447
cg02649613	-0.0108108	0.00294965	-3.6651	0.000247238	-0.0191703	0.00325577	-5.88811	3.90647e-09	-0.0145791	0.00218595	-6.66948	2.56704e-11	0.163592	-0.0145791	0.00218595	2.42298e-09	37	8	21966036	8	22021981	F			NA	NA	NUDT18	NM_024815	Body	chr8:21966485-21967329	N_Shore			NA	8:22021658-22023296			NA	8	22108524	+	NUDT18	ENSG00000275074.2	8	22106874	NUDT18	1	0.0589605	-2.06173
cg02652597	-0.0139338	0.00269698	-5.16645	2.38587e-07	-0.00872829	0.00228841	-3.81413	0.000136663	-0.0109073	0.00174491	-6.2509	4.08089e-10	0.338582	-0.0109073	0.00174491	3.07824e-08	37	2	85811292	2	85664803	F			NA	NA	VAMP5	NM_006634	TSS1500	chr2:85811340-85811855	N_Shore			NA				NA	2	85584168	+	VAMP5	ENSG00000115486.12	2	85544720	GGCX	1	0.0530064	1.72214
cg02652597	-0.0139338	0.00269698	-5.16645	2.38587e-07	-0.00872829	0.00228841	-3.81413	0.000136663	-0.0109073	0.00174491	-6.2509	4.08089e-10	0.338582	-0.0109073	0.00174491	3.07824e-08	37	2	85811292	2	85664803	F			NA	NA	VAMP5	NM_006634	TSS1500	chr2:85811340-85811855	N_Shore			NA				NA	2	85584168	+	VAMP5	ENSG00000168878.16	2	85657314	SFTPB	1	0.0147197	0.786362
cg02652597	-0.0139338	0.00269698	-5.16645	2.38587e-07	-0.00872829	0.00228841	-3.81413	0.000136663	-0.0109073	0.00174491	-6.2509	4.08089e-10	0.338582	-0.0109073	0.00174491	3.07824e-08	37	2	85811292	2	85664803	F			NA	NA	VAMP5	NM_006634	TSS1500	chr2:85811340-85811855	N_Shore			NA				NA	2	85584168	+	VAMP5	ENSG00000168899.5	2	85584431	VAMP5	1	0.0895006	-4.53227
cg02688118	0.0317448	0.00345219	9.19556	3.73059e-20	0.0177904	0.00341633	5.20747	1.91433e-07	0.0246947	0.00242829	10.1696	2.70975e-24	0.0161239	0.0246947	0.00242829	2.25602e-21	37	13	114918456	13	113936558	R			NA	NA				chr13:114914536-114914753	S_Shelf			NA	13:113936432-113936818			NA	13	114152980	-		ENSG00000283361.2	13	114154691	CFAP97D2	1	0.0158813	2.31825
cg02732067	-0.0196541	0.00392113	-5.01236	5.37671e-07	-0.012273	0.00437995	-2.80209	0.00507733	-0.0163703	0.00292145	-5.60348	2.10093e-08	0.454651	-0.0163703	0.00292145	1.12111e-06	37	1	28844028	1	28716615	F			NA	NA	SNHG3-RCC1;RCC1;SNHG3-RCC1;RCC1;SNHG3-RCC1;RCC1	NR_030725;NM_001269;NR_030726;NM_001048195;NM_001048199;NM_001048194	Body;TSS1500;Body;TSS1500;5'UTR;TSS1500	chr1:28844653-28845293	N_Shore			NA		1:28843845-28845626	Promoter_Associated	NA	1	28517515	+	SNHG3-RCC1;RCC1	ENSG00000180198.16	1	28505943	RCC1	1	0.0147737	-0.591849
cg02744588	-0.0123984	0.00275112	-4.50666	6.58555e-06	-0.0161884	0.00264324	-6.12445	9.09951e-10	-0.0143691	0.00190605	-7.5387	4.74668e-14	0.610519	-0.0143691	0.00190605	7.46033e-12	37	19	48823880	19	53515692	F			NA	NA	CCDC114	NM_144577	TSS1500	chr19:48824529-48825493	N_Shore			NA		19:48822674-48824033	Unclassified	NA	19	48320622	+	CCDC114	ENSG00000105479.15	19	48296457	CCDC114	1	0.0141	-1.17762
cg02745912	-0.0122436	0.00491463	-2.49126	0.012729	-0.031851	0.00505096	-6.30594	2.86448e-10	-0.0217792	0.00352238	-6.18309	6.28604e-10	0.0208507	-0.0217792	0.00352238	4.56532e-08	37	7	142494204	7	142204332	R			NA	NA				chr7:142494563-142495248	N_Shore			TRUE				NA	7	142796519	-		ENSG00000282420.1	7	142787017	TRBJ1-2	1	0.0192215	0.660724
cg02745912	-0.0122436	0.00491463	-2.49126	0.012729	-0.031851	0.00505096	-6.30594	2.86448e-10	-0.0217792	0.00352238	-6.18309	6.28604e-10	0.0208507	-0.0217792	0.00352238	4.56532e-08	37	7	142494204	7	142204332	R			NA	NA				chr7:142494563-142495248	N_Shore			TRUE				NA	7	142796519	-		ENSG00000211750.2	7	142656701	TRBV24-1	1	0.0170755	-1.41447
cg02745912	-0.0122436	0.00491463	-2.49126	0.012729	-0.031851	0.00505096	-6.30594	2.86448e-10	-0.0217792	0.00352238	-6.18309	6.28604e-10	0.0208507	-0.0217792	0.00352238	4.56532e-08	37	7	142494204	7	142204332	R			NA	NA				chr7:142494563-142495248	N_Shore			TRUE				NA	7	142796519	-		ENSG00000211751.9	7	142791694	TRBC1	1	0.0229664	0.911264
cg02745912	-0.0122436	0.00491463	-2.49126	0.012729	-0.031851	0.00505096	-6.30594	2.86448e-10	-0.0217792	0.00352238	-6.18309	6.28604e-10	0.0208507	-0.0217792	0.00352238	4.56532e-08	37	7	142494204	7	142204332	R			NA	NA				chr7:142494563-142495248	N_Shore			TRUE				NA	7	142796519	-		ENSG00000211764.1	7	142796365	TRBJ2-1	1	0.0463016	-1.31188
cg02745912	-0.0122436	0.00491463	-2.49126	0.012729	-0.031851	0.00505096	-6.30594	2.86448e-10	-0.0217792	0.00352238	-6.18309	6.28604e-10	0.0208507	-0.0217792	0.00352238	4.56532e-08	37	7	142494204	7	142204332	R			NA	NA				chr7:142494563-142495248	N_Shore			TRUE				NA	7	142796519	-		ENSG00000211771.1	7	142797456	TRBJ2-7	1	0.0265585	-0.936523
cg02745912	-0.0122436	0.00491463	-2.49126	0.012729	-0.031851	0.00505096	-6.30594	2.86448e-10	-0.0217792	0.00352238	-6.18309	6.28604e-10	0.0208507	-0.0217792	0.00352238	4.56532e-08	37	7	142494204	7	142204332	R			NA	NA				chr7:142494563-142495248	N_Shore			TRUE				NA	7	142796519	-		ENSG00000275896.5	7	142760398	PRSS2	1	0.0135378	-0.385818
cg02745912	-0.0122436	0.00491463	-2.49126	0.012729	-0.031851	0.00505096	-6.30594	2.86448e-10	-0.0217792	0.00352238	-6.18309	6.28604e-10	0.0208507	-0.0217792	0.00352238	4.56532e-08	37	7	142494204	7	142204332	R			NA	NA				chr7:142494563-142495248	N_Shore			TRUE				NA	7	142796519	-		ENSG00000211753.4	7	142720660	TRBV28	1	0.0224172	-3.35234
cg02745912	-0.0122436	0.00491463	-2.49126	0.012729	-0.031851	0.00505096	-6.30594	2.86448e-10	-0.0217792	0.00352238	-6.18309	6.28604e-10	0.0208507	-0.0217792	0.00352238	4.56532e-08	37	7	142494204	7	142204332	R			NA	NA				chr7:142494563-142495248	N_Shore			TRUE				NA	7	142796519	-		ENSG00000276953.1	7	142563740	TRBV12-4	1	0.0182319	1.49364
cg02745912	-0.0122436	0.00491463	-2.49126	0.012729	-0.031851	0.00505096	-6.30594	2.86448e-10	-0.0217792	0.00352238	-6.18309	6.28604e-10	0.0208507	-0.0217792	0.00352238	4.56532e-08	37	7	142494204	7	142204332	R			NA	NA				chr7:142494563-142495248	N_Shore			TRUE				NA	7	142796519	-		ENSG00000232869.2	7	142740206	TRBV29-1	1	0.0296349	-1.71347
cg02745912	-0.0122436	0.00491463	-2.49126	0.012729	-0.031851	0.00505096	-6.30594	2.86448e-10	-0.0217792	0.00352238	-6.18309	6.28604e-10	0.0208507	-0.0217792	0.00352238	4.56532e-08	37	7	142494204	7	142204332	R			NA	NA				chr7:142494563-142495248	N_Shore			TRUE				NA	7	142796519	-		ENSG00000211772.11	7	142801041	TRBC2	1	0.0270328	-0.984322
cg02745912	-0.0122436	0.00491463	-2.49126	0.012729	-0.031851	0.00505096	-6.30594	2.86448e-10	-0.0217792	0.00352238	-6.18309	6.28604e-10	0.0208507	-0.0217792	0.00352238	4.56532e-08	37	7	142494204	7	142204332	R			NA	NA				chr7:142494563-142495248	N_Shore			TRUE				NA	7	142796519	-		ENSG00000282780.1	7	142788988	TRBJ1-6	1	0.022538	0.572002
cg02801114	-0.0205174	0.00437204	-4.69287	2.69393e-06	-0.0324385	0.00491251	-6.60324	4.0226e-11	-0.0257864	0.00326593	-7.89556	2.89015e-15	0.193397	-0.0257864	0.00326593	5.60193e-13	37	6	125476162	6	125517861	F			NA	NA	TPD52L1;TPD52L1;TPD52L1;TPD52L1	NM_001003395;NM_003287;NM_001003397;NM_001003396	5'UTR;Body;Body;Body	chr6:125474804-125475722	S_Shore		RDMR	NA	6:125517832-125517876	6:125474694-125476295	Unclassified	NA	6	125155015	+	TPD52L1	ENSG00000111906.17	6	125219962	HDDC2	1	0.021146	-0.653343
cg02812767	-0.0086427	0.0043219	-1.99974	0.0455279	-0.0310479	0.00392807	-7.90411	2.69846e-15	-0.0209124	0.00290685	-7.1942	6.2829e-13	0.000636992	-0.0209124	0.00290685	8.08586e-11	37	15	74218468	15	72005521	F			NA	NA	LOXL1	NM_005576	TSS1500	chr15:74218696-74220373	N_Shore			NA		15:74218389-74218530	Unclassified_Cell_type_specific	NA	15	73926126	+	LOXL1	ENSG00000261801.5	15	73908071	LOXL1-AS1	1	0.0341898	-1.4676
cg02814054	0.0251943	0.0048413	5.20405	1.94997e-07	0.0125897	0.00418936	3.00517	0.00265429	0.0179868	0.00316793	5.67777	1.36462e-08	0.143986	0.0179868	0.00316793	7.58643e-07	37	19	18234911	19	18095911	F			NA	NA	MAST3	NM_015016	Body	chr19:18234710-18234912	Island			NA	19:18095414-18096031			NA	19	18124100	+	MAST3	ENSG00000130518.17	19	18257097	IQCN	1	0.0219062	1.57153
cg02814054	0.0251943	0.0048413	5.20405	1.94997e-07	0.0125897	0.00418936	3.00517	0.00265429	0.0179868	0.00316793	5.67777	1.36462e-08	0.143986	0.0179868	0.00316793	7.58643e-07	37	19	18234911	19	18095911	F			NA	NA	MAST3	NM_015016	Body	chr19:18234710-18234912	Island			NA	19:18095414-18096031			NA	19	18124100	+	MAST3	ENSG00000096996.15	19	18058995	IL12RB1	1	0.0312779	-1.1392
cg02814054	0.0251943	0.0048413	5.20405	1.94997e-07	0.0125897	0.00418936	3.00517	0.00265429	0.0179868	0.00316793	5.67777	1.36462e-08	0.143986	0.0179868	0.00316793	7.58643e-07	37	19	18234911	19	18095911	F			NA	NA	MAST3	NM_015016	Body	chr19:18234710-18234912	Island			NA	19:18095414-18096031			NA	19	18124100	+	MAST3	ENSG00000099308.10	19	18097793	MAST3	1	0.0697714	-1.17864
cg02814054	0.0251943	0.0048413	5.20405	1.94997e-07	0.0125897	0.00418936	3.00517	0.00265429	0.0179868	0.00316793	5.67777	1.36462e-08	0.143986	0.0179868	0.00316793	7.58643e-07	37	19	18234911	19	18095911	F			NA	NA	MAST3	NM_015016	Body	chr19:18234710-18234912	Island			NA	19:18095414-18096031			NA	19	18124100	+	MAST3	ENSG00000254858.9	19	18193182	MPV17L2	1	0.0231643	0.684783
cg02827278	-0.0110247	0.00345291	-3.19288	0.00140861	-0.0169048	0.00321871	-5.25206	1.5041e-07	-0.0141709	0.00235441	-6.01888	1.75629e-09	0.460316	-0.0141709	0.00235441	1.16256e-07	37	12	122063043	12	120547426	F			NA	NA	ORAI1	NM_032790	TSS1500	chr12:122064176-122065142	N_Shore			NA		12:122062474-122063155	Unclassified	NA	12	121625137	+	ORAI1	ENSG00000139714.12	12	121648742	MORN3	1	0.0453442	2.24241
cg02849309	-0.0205657	0.00379368	-5.42104	5.92543e-08	-0.0239919	0.00371588	-6.45659	1.07088e-10	-0.0223143	0.0026546	-8.40589	4.24643e-17	0.812093	-0.0223143	0.0026546	1.12185e-14	37	6	144386280	6	144427973	F			NA	NA	PLAGL1;PLAGL1	NM_001080955;NM_001080951	TSS1500;TSS1500	chr6:144384894-144385888	S_Shore			NA	6:144427945-144427974			NA	6	144065142	+	PLAGL1	ENSG00000118495.19	6	143940300	PLAGL1	1	0.0267991	-1.38968
cg02886591	-0.0141287	0.00323173	-4.37186	1.23193e-05	-0.0200197	0.00298413	-6.70873	1.96323e-11	-0.0173085	0.00219241	-7.89472	2.90966e-15	0.407868	-0.0173085	0.00219241	5.63239e-13	37	17	45773570	17	43128569	R			NA	NA	TBKBP1	NM_014726	1stExon	chr17:45773451-45773695	Island			NA	17:43128451-43128680			NA	17	47696203	-	TBKBP1	ENSG00000228782.7	17	47450568	MRPL45P2	1	0.0166416	-1.01252
cg02886591	-0.0141287	0.00323173	-4.37186	1.23193e-05	-0.0200197	0.00298413	-6.70873	1.96323e-11	-0.0173085	0.00219241	-7.89472	2.90966e-15	0.407868	-0.0173085	0.00219241	5.63239e-13	37	17	45773570	17	43128569	R			NA	NA	TBKBP1	NM_014726	1stExon	chr17:45773451-45773695	Island			NA	17:43128451-43128680			NA	17	47696203	-	TBKBP1	ENSG00000198933.9	17	47694081	TBKBP1	1	0.0908028	4.29681
cg02888894	0.0158112	0.00272724	5.79752	6.73023e-09	0.00777646	0.00285438	2.72439	0.006442	0.0119768	0.00197187	6.07383	1.24898e-09	0.126047	0.0119768	0.00197187	8.53643e-08	37	20	62660605	20	62131049	R			NA	NA	PRPF6	NM_012469	Body	chr20:62660961-62661352	N_Shore			NA				NA	20	64029251	-	PRPF6	ENSG00000196421.8	20	64034344	C20orf204	1	0.0173189	-3.1322
cg02903680	-0.0242766	0.00401013	-6.05381	1.41459e-09	-0.0357216	0.00398408	-8.9661	3.07204e-19	-0.0300364	0.00282633	-10.6273	2.22374e-26	0.128781	-0.0300364	0.00282633	2.75137e-23	37	15	85526198	15	83327202	F	rs74024775		NA	NA	PDE8A;PDE8A	NM_173454;NM_002605	Body;Body	chr15:85523512-85525865	S_Shore			NA				NA	15	84982966	+	PDE8A	ENSG00000073417.15	15	84980440	PDE8A	1	0.0323015	-0.808792
cg02912379	-0.0103507	0.00271902	-3.80676	0.000140798	-0.0127793	0.00270734	-4.72027	2.35537e-06	-0.0115702	0.00191849	-6.0309	1.63052e-09	0.818471	-0.0115702	0.00191849	1.08624e-07	37	1	145054067	1	143765424	F	rs1778748		NA	NA	PDE4DIP	NM_022359	Body					NA		1:145053972-145054405	Promoter_Associated	NA	1	120679540	+	PDE4DIP	ENSG00000286106.1	1	120723946	AC253572.1	1	0.0978728	-7.41783
cg02912379	-0.0103507	0.00271902	-3.80676	0.000140798	-0.0127793	0.00270734	-4.72027	2.35537e-06	-0.0115702	0.00191849	-6.0309	1.63052e-09	0.818471	-0.0115702	0.00191849	1.08624e-07	37	1	145054067	1	143765424	F	rs1778748		NA	NA	PDE4DIP	NM_022359	Body					NA		1:145053972-145054405	Promoter_Associated	NA	1	120679540	+	PDE4DIP	ENSG00000226067.6	1	120913275	LINC00623	1	0.0802618	-3.82787
cg02912379	-0.0103507	0.00271902	-3.80676	0.000140798	-0.0127793	0.00270734	-4.72027	2.35537e-06	-0.0115702	0.00191849	-6.0309	1.63052e-09	0.818471	-0.0115702	0.00191849	1.08624e-07	37	1	145054067	1	143765424	F	rs1778748		NA	NA	PDE4DIP	NM_022359	Body					NA		1:145053972-145054405	Promoter_Associated	NA	1	120679540	+	PDE4DIP	ENSG00000223804.5	1	120267334	AC244669.1	1	0.0307442	-2.61403
cg02912379	-0.0103507	0.00271902	-3.80676	0.000140798	-0.0127793	0.00270734	-4.72027	2.35537e-06	-0.0115702	0.00191849	-6.0309	1.63052e-09	0.818471	-0.0115702	0.00191849	1.08624e-07	37	1	145054067	1	143765424	F	rs1778748		NA	NA	PDE4DIP	NM_022359	Body					NA		1:145053972-145054405	Promoter_Associated	NA	1	120679540	+	PDE4DIP	ENSG00000273136.7	1	120723949	NBPF26	1	0.122914	-11.047
cg02913553	0.0139405	0.00334738	4.1646	3.11896e-05	0.0132612	0.00350534	3.78313	0.000154867	0.0136165	0.00242087	5.62462	1.85917e-08	0.990225	0.0136165	0.00242087	1.00437e-06	37	8	1951383	8	1938790	R			NA	NA	KBTBD11	NM_014867	3'UTR	chr8:1949245-1951390	Island			NA	8:1935880-1939053			NA	8	2003216	-	KBTBD11	ENSG00000253764.2	8	1971181	AC019257.1	1	0.0248312	0.950456
cg02954987	-0.0262325	0.00628477	-4.17397	2.99337e-05	-0.0398172	0.00724874	-5.49299	3.95191e-08	-0.0320621	0.00474851	-6.75203	1.45789e-11	0.366959	-0.0320621	0.00474851	1.44305e-09	37	3	49170599	3	49145603	F			NA	NA	LAMB2	NM_002292	TSS200					TRUE	3:49145500-49145830	3:49170352-49170938	Unclassified	NA	3	49133165	+	LAMB2	ENSG00000172037.14	3	49121114	LAMB2	1	0.29299	-3.66101
cg02962602	-0.0163524	0.00337247	-4.8488	1.2421e-06	-0.0113219	0.00320659	-3.53083	0.000414263	-0.0137104	0.00232383	-5.89992	3.63679e-09	0.557509	-0.0137104	0.00232383	2.26495e-07	37	17	80171413	17	77764702	F			NA	TRUE	CCDC57	NM_198082	TSS1500	chr17:80170322-80171302	S_Shore	low-CpG:77764694-77764748		NA		17:80170242-80172003	Promoter_Associated	NA	17	82213536	+	CCDC57	ENSG00000176155.18	17	82101460	CCDC57	1	0.025805	1.18411
cg02962602	-0.0163524	0.00337247	-4.8488	1.2421e-06	-0.0113219	0.00320659	-3.53083	0.000414263	-0.0137104	0.00232383	-5.89992	3.63679e-09	0.557509	-0.0137104	0.00232383	2.26495e-07	37	17	80171413	17	77764702	F			NA	TRUE	CCDC57	NM_198082	TSS1500	chr17:80170322-80171302	S_Shore	low-CpG:77764694-77764748		NA		17:80170242-80172003	Promoter_Associated	NA	17	82213536	+	CCDC57	ENSG00000169710.9	17	82078338	FASN	1	0.0161136	-1.22999
cg02966722	-0.00773067	0.00277983	-2.78099	0.00541938	-0.0110457	0.00238379	-4.63366	3.59249e-06	-0.00964094	0.00180956	-5.32778	9.942e-08	0.663819	-0.00964094	0.00180956	4.6071e-06	37	15	34876471	15	32663763	F	rs76263722		NA	NA	GOLGA8B	NR_027410	TSS1500	chr15:34874861-34876425	S_Shore			NA		15:34876446-34876599	Promoter_Associated	NA	15	34584269	+	GOLGA8B	ENSG00000215252.11	15	34525207	GOLGA8B	1	0.116559	7.55532
cg02966722	-0.00773067	0.00277983	-2.78099	0.00541938	-0.0110457	0.00238379	-4.63366	3.59249e-06	-0.00964094	0.00180956	-5.32778	9.942e-08	0.663819	-0.00964094	0.00180956	4.6071e-06	37	15	34876471	15	32663763	F	rs76263722		NA	NA	GOLGA8B	NR_027410	TSS1500	chr15:34874861-34876425	S_Shore			NA		15:34876446-34876599	Promoter_Associated	NA	15	34584269	+	GOLGA8B	ENSG00000175265.17	15	34379068	GOLGA8A	1	0.0681873	-4.71706
cg02968508	-0.0147522	0.0027037	-5.45632	4.86114e-08	-0.010519	0.00281362	-3.73862	0.000185034	-0.0127199	0.0019495	-6.5247	6.81359e-11	0.55519	-0.0127199	0.0019495	5.931e-09	37	3	9956698	3	9931698	R			NA	NA	IL17RE;IL17RE;IL17RE	NM_153480;NM_153483;NM_153481	Body;Body;Body	chr3:9956822-9957664	N_Shore			TRUE				NA	3	9915013	-	IL17RE	ENSG00000163702.20	3	9917074	IL17RC	1	0.0447986	-2.73179
cg02991727	-0.021408	0.00357687	-5.98513	2.1622e-09	-0.0168126	0.003809	-4.41391	1.0152e-05	-0.0192546	0.00260743	-7.3845	1.53024e-13	0.679267	-0.0192546	0.00260743	2.19657e-11	37	1	47646024	1	47418611	F	rs35310274		NA	NA								TRUE				NA	1	47180351	+		ENSG00000224805.2	1	47179250	LINC00853	1	0.0192495	1.11792
cg02998240	-0.0303792	0.00517787	-5.86712	4.43435e-09	-0.0301133	0.00490919	-6.13407	8.56601e-10	-0.0302392	0.00356252	-8.48814	2.09976e-17	0.999306	-0.0302392	0.00356252	5.85275e-15	37	1	16508668	1	16381255	R			NA	NA								TRUE				TRUE	1	16182172	-		ENSG00000037637.11	1	16246840	FBXO42	1	0.0233668	-0.30338
cg02998240	-0.0303792	0.00517787	-5.86712	4.43435e-09	-0.0301133	0.00490919	-6.13407	8.56601e-10	-0.0302392	0.00356252	-8.48814	2.09976e-17	0.999306	-0.0302392	0.00356252	5.85275e-15	37	1	16508668	1	16381255	R			NA	NA								TRUE				TRUE	1	16182172	-		ENSG00000132881.12	1	16231692	CPLANE2	1	0.0270838	0.748118
cg03038418	-0.0135277	0.00302659	-4.46961	7.83613e-06	-0.0207014	0.00274276	-7.54765	4.43165e-14	-0.0174666	0.00203238	-8.59417	8.38663e-18	0.213876	-0.0174666	0.00203238	2.49703e-15	37	19	3096512	19	3047512	F			NA	NA	GNA11	NM_002067	Body	chr19:3097564-3097793	N_Shore			TRUE		19:3095771-3096642	Unclassified	NA	19	3096513	+	GNA11	ENSG00000088256.9	19	3094362	GNA11	1	0.0670401	-3.31324
cg03038418	-0.0135277	0.00302659	-4.46961	7.83613e-06	-0.0207014	0.00274276	-7.54765	4.43165e-14	-0.0174666	0.00203238	-8.59417	8.38663e-18	0.213876	-0.0174666	0.00203238	2.49703e-15	37	19	3096512	19	3047512	F			NA	NA	GNA11	NM_002067	Body	chr19:3097564-3097793	N_Shore			TRUE		19:3095771-3096642	Unclassified	NA	19	3096513	+	GNA11	ENSG00000267139.1	19	3118665	AC005262.2	1	0.0251878	-0.705895
cg03124318	-0.0210291	0.00486028	-4.32674	1.51334e-05	-0.0167288	0.00477251	-3.50523	0.000456207	-0.0188398	0.00340528	-5.53252	3.15666e-08	0.819318	-0.0188398	0.00340528	1.62247e-06	37	12	109491989	12	107976372	R			NA	NA	USP30	NM_032663	Body	chr12:109490238-109490673	S_Shore			NA				NA	12	109054183	-	USP30	ENSG00000256262.1	12	109052350	USP30-AS1	1	0.0278507	-0.934298
cg03127244	-0.0141324	0.00355672	-3.97342	7.08472e-05	-0.0160018	0.00364988	-4.38419	1.16417e-05	-0.0150429	0.00254728	-5.90548	3.51626e-09	0.934936	-0.0150429	0.00254728	2.19695e-07	37	6	33245638	6	33353616	F			NA	NA	B3GALT4	NM_003782	1stExon	chr6:33244677-33245554	S_Shore			TRUE	6:33352687-33353910	6:33244505-33246488	Promoter_Associated	TRUE	6	33277860	+	B3GALT4	ENSG00000231500.7	6	33272075	RPS18	1	0.0227323	1.17106
cg03149958	-0.0209141	0.0036348	-5.75384	8.72389e-09	-0.0215071	0.00367942	-5.84523	5.05862e-09	-0.0212069	0.00258582	-8.20124	2.37929e-16	0.993448	-0.0212069	0.00258582	5.5168e-14	37	6	36326677	6	36434655	R			NA	NA								TRUE		6:36325945-36326687	Unclassified_Cell_type_specific	NA	6	36358899	-		ENSG00000112062.10	6	36027677	MAPK14	1	0.0136554	-0.696502
cg03149958	-0.0209141	0.0036348	-5.75384	8.72389e-09	-0.0215071	0.00367942	-5.84523	5.05862e-09	-0.0212069	0.00258582	-8.20124	2.37929e-16	0.993448	-0.0212069	0.00258582	5.5168e-14	37	6	36326677	6	36434655	R			NA	NA								TRUE		6:36325945-36326687	Unclassified_Cell_type_specific	NA	6	36358899	-		ENSG00000112053.13	6	35943514	SLC26A8	1	0.0180422	-1.99422
cg03169557	0.0148333	0.00344891	4.30085	1.70142e-05	0.0152276	0.00360135	4.22829	2.35471e-05	0.0150219	0.0024909	6.03072	1.63234e-09	0.996879	0.0150219	0.0024909	1.0873e-07	37	16	89598950	16	88126451	F			NA	NA	SPG7;SPG7	NM_003119;NM_199367	Body;Body					NA	16:88125806-88126517	16:89598805-89599216	Unclassified_Cell_type_specific	NA	16	89532541	+	SPG7	ENSG00000261118.1	16	89492017	AC092123.1	1	0.0168161	-0.461878
cg03169557	0.0148333	0.00344891	4.30085	1.70142e-05	0.0152276	0.00360135	4.22829	2.35471e-05	0.0150219	0.0024909	6.03072	1.63234e-09	0.996879	0.0150219	0.0024909	1.0873e-07	37	16	89598950	16	88126451	F			NA	NA	SPG7;SPG7	NM_003119;NM_199367	Body;Body					NA	16:88125806-88126517	16:89598805-89599216	Unclassified_Cell_type_specific	NA	16	89532541	+	SPG7	ENSG00000197912.15	16	89490719	SPG7	1	0.0704122	-1.24414
cg03172931	-0.0119036	0.00253946	-4.68745	2.76628e-06	-0.0174793	0.00260865	-6.70051	2.07695e-11	-0.0146165	0.00181964	-8.03265	9.53905e-16	0.309502	-0.0146165	0.00181964	1.98175e-13	37	19	8677774	19	8583774	F			NA	NA				chr19:8674332-8674764	S_Shelf			NA		19:8677769-8678053	Unclassified_Cell_type_specific	NA	19	8612888	+		ENSG00000142303.14	19	8580240	ADAMTS10	1	0.0635222	-4.03296
cg03178042	-0.0195266	0.0039413	-4.95435	7.25713e-07	-0.0259262	0.00345221	-7.51003	5.91117e-14	-0.0231479	0.00259688	-8.91372	4.93498e-19	0.474285	-0.0231479	0.00259688	1.7988e-16	37	16	68544012	16	67101513	R			NA	NA				chr16:68543925-68544303	Island			NA	16:67101500-67101854	16:68543572-68545045	Unclassified	TRUE	16	68510108	-		ENSG00000184939.16	16	68530090	ZFP90	1	0.0139523	-1.06866
cg03180426	-0.0156633	0.00241268	-6.49208	8.46592e-11	-0.0128338	0.00304725	-4.2116	2.53572e-05	-0.014573	0.00189157	-7.7042	1.31667e-14	0.767215	-0.014573	0.00189157	2.28554e-12	37	9	139964156	9	139083977	R			NA	NA	C9orf140	NM_178448	Body	chr9:139964155-139965284	Island			NA				NA	9	137069703	-	C9orf140	ENSG00000197355.11	9	137077517	UAP1L1	1	0.0156166	-2.04543
cg03194226	-0.0107505	0.00237445	-4.52759	5.966e-06	-0.00780124	0.00158971	-4.90732	9.23284e-07	-0.00871406	0.00132099	-6.59664	4.20594e-11	0.58705	-0.00871406	0.00132099	3.80232e-09	37	3	45066832	3	45041836	R			NA	NA	CLEC3B	NM_003278	TSS1500					NA				NA	3	45025339	-	CLEC3B	ENSG00000163815.6	3	45001548	CLEC3B	1	0.0445967	-3.07163
cg03222009	-0.0214163	0.00466345	-4.59237	4.38249e-06	-0.0258507	0.00440776	-5.86481	4.49642e-09	-0.0237584	0.00320334	-7.41676	1.20022e-13	0.787591	-0.0237584	0.00320334	1.76436e-11	37	2	129077232	2	128793702	R			NA	NA	HS6ST1	NM_004807	TSS1500	chr2:129075197-129077639	Island			NA	2:128793679-128794109			NA	2	128319657	-	HS6ST1	ENSG00000136720.7	2	128236716	HS6ST1	1	0.0231677	-0.746301
cg03222066	-0.0131529	0.00367263	-3.58131	0.000341871	-0.0156608	0.00362858	-4.31596	1.58914e-05	-0.0144219	0.00258123	-5.58725	2.307e-08	0.888711	-0.0144219	0.00258123	1.22069e-06	37	11	119019384	11	118524594	R			NA	TRUE	ABCG4;ABCG4	NM_001142505;NM_022169	TSS1500;TSS1500	chr11:119019643-119020887	N_Shore			NA		11:119019275-119020452	Unclassified_Cell_type_specific	NA	11	119148673	-	ABCG4	ENSG00000172375.13	11	119102198	C2CD2L	1	0.0365202	-1.01385
cg03222066	-0.0131529	0.00367263	-3.58131	0.000341871	-0.0156608	0.00362858	-4.31596	1.58914e-05	-0.0144219	0.00258123	-5.58725	2.307e-08	0.888711	-0.0144219	0.00258123	1.22069e-06	37	11	119019384	11	118524594	R			NA	TRUE	ABCG4;ABCG4	NM_001142505;NM_022169	TSS1500;TSS1500	chr11:119019643-119020887	N_Shore			NA		11:119019275-119020452	Unclassified_Cell_type_specific	NA	11	119148673	-	ABCG4	ENSG00000172273.12	11	119121587	HINFP	1	0.0180488	0.530213
cg03222066	-0.0131529	0.00367263	-3.58131	0.000341871	-0.0156608	0.00362858	-4.31596	1.58914e-05	-0.0144219	0.00258123	-5.58725	2.307e-08	0.888711	-0.0144219	0.00258123	1.22069e-06	37	11	119019384	11	118524594	R			NA	TRUE	ABCG4;ABCG4	NM_001142505;NM_022169	TSS1500;TSS1500	chr11:119019643-119020887	N_Shore			NA		11:119019275-119020452	Unclassified_Cell_type_specific	NA	11	119148673	-	ABCG4	ENSG00000172367.16	11	119185457	PDZD3	1	0.0390813	-1.86704
cg03224418	-0.0254301	0.0031157	-8.1619	3.29802e-16	-0.0223424	0.00316932	-7.04958	1.79462e-12	-0.0239126	0.00222185	-10.7625	5.17722e-27	0.785579	-0.0239126	0.00222185	7.11736e-24	37	20	62611858	20	62082302	F	rs75097987		NA	TRUE	SAMD10;PRPF6	NM_080621;NM_012469	TSS1500;TSS1500	chr20:62612300-62612787	N_Shore			TRUE		20:62610540-62612991	Promoter_Associated	NA	20	63980504	+	SAMD10;PRPF6	ENSG00000130590.14	20	63974116	SAMD10	1	0.0446835	-2.74853
cg03224418	-0.0254301	0.0031157	-8.1619	3.29802e-16	-0.0223424	0.00316932	-7.04958	1.79462e-12	-0.0239126	0.00222185	-10.7625	5.17722e-27	0.785579	-0.0239126	0.00222185	7.11736e-24	37	20	62611858	20	62082302	F	rs75097987		NA	TRUE	SAMD10;PRPF6	NM_080621;NM_012469	TSS1500;TSS1500	chr20:62612300-62612787	N_Shore			TRUE		20:62610540-62612991	Promoter_Associated	NA	20	63980504	+	SAMD10;PRPF6	ENSG00000196421.8	20	64034344	C20orf204	1	0.0663267	-6.1744
cg03224418	-0.0254301	0.0031157	-8.1619	3.29802e-16	-0.0223424	0.00316932	-7.04958	1.79462e-12	-0.0239126	0.00222185	-10.7625	5.17722e-27	0.785579	-0.0239126	0.00222185	7.11736e-24	37	20	62611858	20	62082302	F	rs75097987		NA	TRUE	SAMD10;PRPF6	NM_080621;NM_012469	TSS1500;TSS1500	chr20:62612300-62612787	N_Shore			TRUE		20:62610540-62612991	Promoter_Associated	NA	20	63980504	+	SAMD10;PRPF6	ENSG00000101161.8	20	63981132	PRPF6	1	0.0207461	-0.95467
cg03239580	-0.0126663	0.00237082	-5.34259	9.16288e-08	-0.0113295	0.00190842	-5.93662	2.90959e-09	-0.0118551	0.00148662	-7.97457	1.52911e-15	0.908046	-0.0118551	0.00148662	3.10152e-13	37	6	31973051	6	32081029	R			NA	NA	CYP21A2;CYP21A2	NM_000500;NM_001128590	TSS1500;TSS1500					NA				NA	6	32005273	-	CYP21A2	ENSG00000204351.12	6	31959117	SKIV2L	1	0.0142295	1.29578
cg03258665	-0.00805646	0.00386947	-2.08206	0.0373373	-0.0196597	0.0035483	-5.5406	3.01437e-08	-0.0143595	0.00261521	-5.49077	4.00174e-08	0.0869609	-0.0143595	0.00261521	2.01384e-06	37	1	16472461	1	16345048	R			NA	NA	EPHA2	NM_004431	Body	chr1:16475111-16475324	N_Shelf			TRUE	1:16345044-16345325	1:16472401-16472643	Unclassified_Cell_type_specific	NA	1	16145965	-	EPHA2	ENSG00000142632.17	1	16197854	ARHGEF19	1	0.013876	0.899874
cg03260624	-0.0128197	0.00319577	-4.01146	6.03442e-05	-0.0175155	0.00331459	-5.28437	1.26138e-07	-0.0150819	0.00230061	-6.55563	5.54089e-11	0.594474	-0.0150819	0.00230061	4.91049e-09	37	1	91970722	1	91743310	F	rs36036746		NA	NA	CDC7;CDC7;CDC7	NM_003503;NM_001134420;NM_001134419	Body;Body;Body	chr1:91966263-91966999	S_Shelf			NA				NA	1	91505164	+	CDC7	ENSG00000097046.13	1	91500851	CDC7	1	0.06854	-2.68515
cg03270204	-0.00890531	0.0020962	-4.24831	2.1539e-05	-0.00797105	0.00170541	-4.67397	2.95426e-06	-0.00834314	0.0013229	-6.30671	2.85022e-10	0.941988	-0.00834314	0.0013229	2.21831e-08	37	6	30851638	6	30959617	R		rs73727107	NA	TRUE	DDR1;DDR1	NM_001954;NM_013993	TSS1500;TSS1500	chr6:30852102-30852676	N_Shore			NA				NA	6	30883860	-	DDR1	ENSG00000137411.17	6	30908242	VARS2	1	0.0256363	-2.24968
cg03270204	-0.00890531	0.0020962	-4.24831	2.1539e-05	-0.00797105	0.00170541	-4.67397	2.95426e-06	-0.00834314	0.0013229	-6.30671	2.85022e-10	0.941988	-0.00834314	0.0013229	2.21831e-08	37	6	30851638	6	30959617	R		rs73727107	NA	TRUE	DDR1;DDR1	NM_001954;NM_013993	TSS1500;TSS1500	chr6:30852102-30852676	N_Shore			NA				NA	6	30883860	-	DDR1	ENSG00000204580.13	6	30876421	DDR1	1	0.0276658	-3.26667
cg03272408	-0.0156246	0.00394685	-3.95876	7.534e-05	-0.0146789	0.00383973	-3.82291	0.000131889	-0.0151388	0.00275219	-5.50063	3.78445e-08	0.98536	-0.0151388	0.00275219	1.91466e-06	37	17	46103607	17	43458606	R			NA	NA	COPZ2	NM_016429	3'UTR	chr17:46100797-46102904	S_Shore			NA				NA	17	48026240	-	COPZ2	ENSG00000002919.14	17	48103357	SNX11	1	0.0184904	-0.553756
cg03289906	-0.0328171	0.00380711	-8.61996	6.69787e-18	-0.0409465	0.00392269	-10.4384	1.65605e-25	-0.0367603	0.00273198	-13.4556	2.85596e-41	0.330938	-0.0367603	0.00273198	3.74146e-37	37	7	94538408	7	94376344	F			NA	NA	PPP1R9A;PPP1R9A;PPP1R9A;PPP1R9A;PPP1R9A	NM_001166161;NM_001166160;NM_001166163;NM_001166162;NM_017650	TSS1500;5'UTR;TSS1500;TSS1500;5'UTR	chr7:94536849-94537477	S_Shore			NA				NA	7	94909095	+	PPP1R9A	ENSG00000158528.12	7	94907202	PPP1R9A	1	0.0198984	-1.01206
cg03291835	0.0229547	0.00446751	5.13814	2.77477e-07	0.0127864	0.00396114	3.22796	0.00124677	0.0172619	0.00296388	5.82408	5.74297e-09	0.234535	0.0172619	0.00296388	3.44515e-07	37	13	110802745	13	109600746	R			NA	NA	COL4A1	NM_001845	Body			low-CpG:109600386-109600764		NA				NA	13	110150397	-	COL4A1	ENSG00000187498.16	13	110148963	COL4A1	1	0.0590851	-1.24116
cg03321553	-0.0126578	0.00269179	-4.70237	2.57164e-06	-0.013132	0.00267644	-4.90649	9.27191e-07	-0.0128962	0.00189793	-6.79487	1.08407e-11	0.992229	-0.0128962	0.00189793	1.10067e-09	37	15	41806234	15	39593526	F	rs3217533		NA	NA	LTK;LTK;LTK	NM_206961;NM_002344;NM_001135685	TSS200;TSS200;TSS200	chr15:41803443-41805531	S_Shore			NA				TRUE	15	41514035	+	LTK	ENSG00000062524.16	15	41503637	LTK	1	0.0268963	-4.20884
cg03326252	-0.0162352	0.0059736	-2.71782	0.00657136	-0.0307454	0.0052583	-5.84703	5.00433e-09	-0.0244107	0.00394698	-6.18465	6.22414e-10	0.189719	-0.0244107	0.00394698	4.52406e-08	37	11	133821166	11	133326376	R			NA	NA	IGSF9B	NM_014987	Body				RDMR	TRUE	11:133326274-133326523			TRUE	11	133951270	-	IGSF9B	ENSG00000080854.14	11	133908564	IGSF9B	1	0.0437359	1.59011
cg03348792	-0.0124341	0.00313812	-3.96229	7.42351e-05	-0.0186631	0.00248191	-7.51964	5.49258e-14	-0.0162662	0.00194667	-8.35589	6.494e-17	0.297628	-0.0162662	0.00194667	1.66525e-14	37	12	53075482	12	51361749	F	rs77883998		NA	NA	KRT1	NM_006121	TSS1500					NA		12:53075322-53075564	Unclassified_Cell_type_specific	NA	12	52681697	+	KRT1	ENSG00000170486.11	12	52585589	KRT72	1	0.0428134	-9.14812
cg03348792	-0.0124341	0.00313812	-3.96229	7.42351e-05	-0.0186631	0.00248191	-7.51964	5.49258e-14	-0.0162662	0.00194667	-8.35589	6.494e-17	0.297628	-0.0162662	0.00194667	1.66525e-14	37	12	53075482	12	51361749	F	rs77883998		NA	NA	KRT1	NM_006121	TSS1500					NA		12:53075322-53075564	Unclassified_Cell_type_specific	NA	12	52681697	+	KRT1	ENSG00000186049.8	12	52607570	KRT73	1	0.039315	-6.71544
cg03348792	-0.0124341	0.00313812	-3.96229	7.42351e-05	-0.0186631	0.00248191	-7.51964	5.49258e-14	-0.0162662	0.00194667	-8.35589	6.494e-17	0.297628	-0.0162662	0.00194667	1.66525e-14	37	12	53075482	12	51361749	F	rs77883998		NA	NA	KRT1	NM_006121	TSS1500					NA		12:53075322-53075564	Unclassified_Cell_type_specific	NA	12	52681697	+	KRT1	ENSG00000170484.9	12	52565782	KRT74	1	0.021669	-1.22825
cg03354707	-0.00857799	0.00291198	-2.94576	0.00322163	-0.0135099	0.00251497	-5.3718	7.7954e-08	-0.0114028	0.00190336	-5.99089	2.08696e-09	0.439775	-0.0114028	0.00190336	1.36221e-07	37	19	41115390	19	45807230	F			NA	NA	LTBP4;LTBP4;LTBP4	NM_001042545;NM_001042544;NM_003573	Body;Body;Body	chr19:41115445-41115767	N_Shore			NA		19:41114969-41116918	Unclassified	NA	19	40609483	+	LTBP4	ENSG00000160410.15	19	40576853	SHKBP1	1	0.0496972	-2.04969
cg03367679	-0.0110729	0.0031392	-3.52729	0.000419831	-0.0127732	0.00245904	-5.1944	2.05381e-07	-0.0121266	0.00193582	-6.26433	3.74441e-10	0.913102	-0.0121266	0.00193582	2.84807e-08	37	17	38183553	17	35437079	R			NA	NA	MED24;MED24;SNORD124	NM_014815;NM_001079518;NR_003692	Body;Body;TSS1500					TRUE		17:38182979-38183798	Gene_Associated	NA	17	40027299	-	MED24;SNORD124	ENSG00000073605.18	17	39904595	GSDMB	1	0.0220868	1.88344
cg03367679	-0.0110729	0.0031392	-3.52729	0.000419831	-0.0127732	0.00245904	-5.1944	2.05381e-07	-0.0121266	0.00193582	-6.26433	3.74441e-10	0.913102	-0.0121266	0.00193582	2.84807e-08	37	17	38183553	17	35437079	R			NA	NA	MED24;MED24;SNORD124	NM_014815;NM_001079518;NR_003692	Body;Body;TSS1500					TRUE		17:38182979-38183798	Gene_Associated	NA	17	40027299	-	MED24;SNORD124	ENSG00000172057.10	17	39921041	ORMDL3	1	0.0153676	1.3699
cg03367679	-0.0110729	0.0031392	-3.52729	0.000419831	-0.0127732	0.00245904	-5.1944	2.05381e-07	-0.0121266	0.00193582	-6.26433	3.74441e-10	0.913102	-0.0121266	0.00193582	2.84807e-08	37	17	38183553	17	35437079	R			NA	NA	MED24;MED24;SNORD124	NM_014815;NM_001079518;NR_003692	Body;Body;TSS1500					TRUE		17:38182979-38183798	Gene_Associated	NA	17	40027299	-	MED24;SNORD124	ENSG00000167914.11	17	39953263	GSDMA	1	0.0149618	2.26083
cg03374695	-0.00808441	0.00354497	-2.28053	0.0225761	-0.0203344	0.00290874	-6.9908	2.73322e-12	-0.0154054	0.00224866	-6.85096	7.33571e-12	0.0282052	-0.0154054	0.00224866	7.70082e-10	37	8	127568328	8	127637510	R			NA	NA	FAM84B	NM_174911	3'UTR	chr8:127568676-127570873	N_Shore			NA				NA	8	126556082	-	FAM84B	ENSG00000168672.4	8	126552443	FAM84B	1	0.018924	-1.32278
cg03383434	-0.0188848	0.00402544	-4.69137	2.71379e-06	-0.0163593	0.00451943	-3.61977	0.00029486	-0.0177676	0.00300595	-5.9108	3.40441e-09	0.916617	-0.0177676	0.00300595	2.13215e-07	37	9	140318662	9	139438483	F			NA	NA	EXD3;NOXA1	NM_017820;NM_006647	TSS1500;Body	chr9:140317160-140318663	Island			NA	9:139436764-139438576			NA	9	137424209	+	EXD3;NOXA1	ENSG00000165802.22	9	137447573	NSMF	1	0.0136926	0.716922
cg03383434	-0.0188848	0.00402544	-4.69137	2.71379e-06	-0.0163593	0.00451943	-3.61977	0.00029486	-0.0177676	0.00300595	-5.9108	3.40441e-09	0.916617	-0.0177676	0.00300595	2.13215e-07	37	9	140318662	9	139438483	F			NA	NA	EXD3;NOXA1	NM_017820;NM_006647	TSS1500;Body	chr9:140317160-140318663	Island			NA	9:139436764-139438576			NA	9	137424209	+	EXD3;NOXA1	ENSG00000188747.8	9	137423350	NOXA1	1	0.0146538	-0.982032
cg03387723	-0.0308194	0.00438715	-7.02492	2.14194e-12	-0.0216473	0.00422314	-5.12587	2.96167e-07	-0.0260587	0.00304254	-8.56477	1.08291e-17	0.321631	-0.0260587	0.00304254	3.1588e-15	37	1	41708464	1	41481051	F			NA	TRUE	SCMH1	NM_012236	TSS1500	chr1:41706957-41708327	S_Shore			NA				NA	1	41242791	+	SCMH1	ENSG00000235358.1	1	41242373	AC093151.3	1	0.0180175	-0.0703151
cg03395898	-0.00995449	0.003451	-2.88453	0.00392003	-0.0220696	0.00354541	-6.22483	4.82091e-10	-0.0158486	0.00247293	-6.40883	1.46644e-10	0.0498895	-0.0158486	0.00247293	1.20113e-08	37	14	76448011	14	75517764	F			NA	TRUE	TGFB3;TGFB3	NM_003239;NM_003239	1stExon;5'UTR	chr14:76448623-76449389	N_Shore			NA		14:76447789-76449556	Promoter_Associated	NA	14	75981667	+	TGFB3	ENSG00000119699.7	14	75958099	TGFB3	1	0.0552626	-1.74889
cg03419014	-0.0112125	0.00275011	-4.0771	4.56015e-05	-0.0224076	0.00366707	-6.11049	9.93228e-10	-0.0152424	0.00220014	-6.92789	4.2716e-12	0.0506612	-0.0152424	0.00220014	4.71303e-10	37	21	38362742	21	37284612	F			NA	NA	HLCS	NM_000411	TSS1500	chr21:38362015-38362868	Island	high-CpG:37284351-37284750		NA	21:37283856-37284855	21:38361807-38363195	Promoter_Associated	NA	21	36990441	+	HLCS	ENSG00000159267.14	21	36750888	HLCS	1	0.0516657	1.30282
cg03446427	-0.0113481	0.0031199	-3.63733	0.000275478	-0.0121306	0.00270978	-4.47661	7.58372e-06	-0.0117942	0.00204585	-5.76493	8.1694e-09	0.98223	-0.0117942	0.00204585	4.74605e-07	37	4	1019985	4	1009985	R			NA	NA	FGFRL1;FGFRL1;FGFRL1	NM_001004356;NM_001004358;NM_021923	3'UTR;3'UTR;3'UTR	chr4:1021106-1021338	N_Shore			NA	4:1009137-1010146	4:1019957-1020508	Unclassified_Cell_type_specific	TRUE	4	1026196	-	FGFRL1	ENSG00000127418.15	4	1009936	FGFRL1	1	0.0249644	2.17432
cg03474926	-0.0118769	0.00183136	-6.48526	8.85809e-11	-0.0127498	0.00182978	-6.96793	3.21642e-12	-0.0123137	0.00129441	-9.51299	1.85268e-21	0.944737	-0.0123137	0.00129441	1.00759e-18	37	9	136023407	9	135013228	R			NA	NA	RALGDS	NM_001042368	Body	chr9:136024223-136025112	N_Shore			TRUE				NA	9	133148019	-	RALGDS	ENSG00000148288.13	9	133152948	GBGT1	1	0.0197321	-2.54286
cg03480383	-0.0122048	0.00255179	-4.78285	1.72824e-06	-0.0116869	0.00283103	-4.12813	3.65731e-05	-0.0119726	0.00189544	-6.31654	2.67488e-10	0.990808	-0.0119726	0.00189544	2.09245e-08	37	16	89930147	16	88457648	F			NA	NA	SPIRE2	NM_032451	Body					TRUE		16:89929858-89931258	Promoter_Associated_Cell_type_specific	TRUE	16	89863738	+	SPIRE2	ENSG00000204991.11	16	89818179	SPIRE2	1	0.0472599	2.3665
cg03517919	-0.0174141	0.00380486	-4.57682	4.72105e-06	-0.021283	0.00406608	-5.23428	1.65625e-07	-0.0192203	0.0027782	-6.91826	4.57232e-12	0.785569	-0.0192203	0.0027782	5.0076e-10	37	1	10398268	1	10320855	F		rs77560229	NA	NA	KIF1B	NM_015074	Body					NA		1:10397803-10398952	Unclassified	TRUE	1	10338209	+	KIF1B	ENSG00000054523.17	1	10210805	KIF1B	1	0.0514573	1.7068
cg03517919	-0.0174141	0.00380486	-4.57682	4.72105e-06	-0.021283	0.00406608	-5.23428	1.65625e-07	-0.0192203	0.0027782	-6.91826	4.57232e-12	0.785569	-0.0192203	0.0027782	5.0076e-10	37	1	10398268	1	10320855	F		rs77560229	NA	NA	KIF1B	NM_015074	Body					NA		1:10397803-10398952	Unclassified	TRUE	1	10338209	+	KIF1B	ENSG00000284642.1	1	10395416	AL139424.2	1	0.0167142	0.876848
cg03530364	0.0141124	0.00262234	5.38161	7.38233e-08	0.0107886	0.00224624	4.80297	1.56331e-06	0.0121953	0.00170595	7.14867	8.76197e-13	0.629188	0.0121953	0.00170595	1.09964e-10	37	3	68056706	3	68139396	R			NA	NA	FAM19A1	NM_213609	Body	chr3:68056899-68057167	N_Shore			NA	3:68139396-68139857	3:68056607-68057357	Unclassified_Cell_type_specific	NA	3	68007562	-	FAM19A1	ENSG00000183662.11	3	68004247	FAM19A1	1	0.0249911	-1.64055
cg03552293	-0.0177224	0.00465076	-3.81065	0.000138603	-0.0237326	0.0047326	-5.0147	5.31155e-07	-0.0206751	0.00331714	-6.2328	4.58166e-10	0.663498	-0.0206751	0.00331714	3.41606e-08	37	3	113160183	3	114642873	F			NA	NA	WDR52;WDR52	NM_001164496;NM_018338	5'UTR;5'UTR	chr3:113160299-113160641	N_Shore			NA	3:114642704-114643181			TRUE	3	113441335	+	WDR52	ENSG00000206530.11	3	113286930	CFAP44	1	0.0398496	0.962266
cg03566156	-0.0098946	0.00291829	-3.39055	0.000697528	-0.0130905	0.0020558	-6.36757	1.92043e-10	-0.0120305	0.00168065	-7.15823	8.1724e-13	0.669811	-0.0120305	0.00168065	1.03235e-10	37	12	49319558	12	47605825	R			NA	NA	FKBP11;FKBP11;FKBP11	NM_001143781;NM_001143782;NM_016594	TSS1500;TSS1500;TSS1500	chr12:49318486-49319476	S_Shore			NA		12:49317346-49319824	Promoter_Associated	TRUE	12	48925774	-	FKBP11	ENSG00000134287.10	12	48935723	ARF3	1	0.0176846	1.07059
cg03566156	-0.0098946	0.00291829	-3.39055	0.000697528	-0.0130905	0.0020558	-6.36757	1.92043e-10	-0.0120305	0.00168065	-7.15823	8.1724e-13	0.669811	-0.0120305	0.00168065	1.03235e-10	37	12	49319558	12	47605825	R			NA	NA	FKBP11;FKBP11;FKBP11	NM_001143781;NM_001143782;NM_016594	TSS1500;TSS1500;TSS1500	chr12:49318486-49319476	S_Shore			NA		12:49317346-49319824	Promoter_Associated	TRUE	12	48925774	-	FKBP11	ENSG00000239617.1	12	48903418	AC073610.1	1	0.0138517	1.15729
cg03568305	-0.0116032	0.00343564	-3.37731	0.000731998	-0.0143171	0.00281518	-5.08569	3.663e-07	-0.0132269	0.00217753	-6.07429	1.24534e-09	0.82972	-0.0132269	0.00217753	8.51284e-08	37	17	38183559	17	35437085	R		rs72417196	NA	NA	MED24;MED24;SNORD124	NM_014815;NM_001079518;NR_003692	Body;Body;TSS1500					TRUE		17:38182979-38183798	Gene_Associated	NA	17	40027305	-	MED24;SNORD124	ENSG00000167914.11	17	39953263	GSDMA	1	0.0175513	2.26277
cg03568305	-0.0116032	0.00343564	-3.37731	0.000731998	-0.0143171	0.00281518	-5.08569	3.663e-07	-0.0132269	0.00217753	-6.07429	1.24534e-09	0.82972	-0.0132269	0.00217753	8.51284e-08	37	17	38183559	17	35437085	R		rs72417196	NA	NA	MED24;MED24;SNORD124	NM_014815;NM_001079518;NR_003692	Body;Body;TSS1500					TRUE		17:38182979-38183798	Gene_Associated	NA	17	40027305	-	MED24;SNORD124	ENSG00000172057.10	17	39921041	ORMDL3	1	0.0226117	1.53555
cg03568305	-0.0116032	0.00343564	-3.37731	0.000731998	-0.0143171	0.00281518	-5.08569	3.663e-07	-0.0132269	0.00217753	-6.07429	1.24534e-09	0.82972	-0.0132269	0.00217753	8.51284e-08	37	17	38183559	17	35437085	R		rs72417196	NA	NA	MED24;MED24;SNORD124	NM_014815;NM_001079518;NR_003692	Body;Body;TSS1500					TRUE		17:38182979-38183798	Gene_Associated	NA	17	40027305	-	MED24;SNORD124	ENSG00000073605.18	17	39904595	GSDMB	1	0.0260075	1.88862
cg03575602	-0.0153471	0.00318049	-4.82538	1.39737e-06	-0.0193639	0.00272509	-7.10576	1.19662e-12	-0.0176634	0.00206938	-8.53559	1.39439e-17	0.631353	-0.0176634	0.00206938	3.9967e-15	37	10	12390599	10	12430605	F			NA	NA	CAMK1D;CAMK1D	NM_020397;NM_153498	TSS1500;TSS1500	chr10:12390802-12392589	N_Shore			NA				NA	10	12348599	+	CAMK1D	ENSG00000183049.12	10	12349482	CAMK1D	1	0.0300672	-1.74565
cg03575969	-0.0161653	0.00306999	-5.2656	1.39733e-07	-0.0207052	0.00300359	-6.89349	5.44393e-12	-0.0184849	0.00214695	-8.60985	7.31592e-18	0.571972	-0.0184849	0.00214695	2.20775e-15	37	11	72492171	11	72169819	R			NA	NA	STARD10	NM_006645	Body	chr11:72492281-72492644	N_Shore			NA		11:72491904-72493848	Unclassified	NA	11	72781125	-	STARD10	ENSG00000214530.9	11	72754729	STARD10	1	0.0454269	-2.41384
cg03594868	0.022472	0.00367513	6.11461	9.67909e-10	0.0114831	0.00342634	3.35141	0.00080401	0.016593	0.00250613	6.62098	3.56837e-11	0.0914857	0.016593	0.00250613	3.27107e-09	37	19	18234829	19	18095829	F			NA	NA	MAST3	NM_015016	Body	chr19:18234710-18234912	Island			NA	19:18095414-18096031	19:18234666-18234832	Unclassified_Cell_type_specific	NA	19	18124018	+	MAST3	ENSG00000096996.15	19	18058995	IL12RB1	1	0.0321424	-1.26993
cg03594868	0.022472	0.00367513	6.11461	9.67909e-10	0.0114831	0.00342634	3.35141	0.00080401	0.016593	0.00250613	6.62098	3.56837e-11	0.0914857	0.016593	0.00250613	3.27107e-09	37	19	18234829	19	18095829	F			NA	NA	MAST3	NM_015016	Body	chr19:18234710-18234912	Island			NA	19:18095414-18096031	19:18234666-18234832	Unclassified_Cell_type_specific	NA	19	18124018	+	MAST3	ENSG00000130518.17	19	18257097	IQCN	1	0.0237181	1.79821
cg03594868	0.022472	0.00367513	6.11461	9.67909e-10	0.0114831	0.00342634	3.35141	0.00080401	0.016593	0.00250613	6.62098	3.56837e-11	0.0914857	0.016593	0.00250613	3.27107e-09	37	19	18234829	19	18095829	F			NA	NA	MAST3	NM_015016	Body	chr19:18234710-18234912	Island			NA	19:18095414-18096031	19:18234666-18234832	Unclassified_Cell_type_specific	NA	19	18124018	+	MAST3	ENSG00000254858.9	19	18193182	MPV17L2	1	0.0153295	0.612589
cg03594868	0.022472	0.00367513	6.11461	9.67909e-10	0.0114831	0.00342634	3.35141	0.00080401	0.016593	0.00250613	6.62098	3.56837e-11	0.0914857	0.016593	0.00250613	3.27107e-09	37	19	18234829	19	18095829	F			NA	NA	MAST3	NM_015016	Body	chr19:18234710-18234912	Island			NA	19:18095414-18096031	19:18234666-18234832	Unclassified_Cell_type_specific	NA	19	18124018	+	MAST3	ENSG00000099308.10	19	18097793	MAST3	1	0.0603648	-1.20558
cg03608520	-0.0128131	0.0039912	-3.21035	0.00132575	-0.0167151	0.00357677	-4.67324	2.96486e-06	-0.0149772	0.00266367	-5.62276	1.87932e-08	0.767177	-0.0149772	0.00266367	1.0144e-06	37	6	31696720	6	31804699	F			NA	NA	DDAH2	NM_013974	Body	chr6:31695894-31698245	Island			NA	6:31803930-31805132	6:31696696-31698363	Promoter_Associated	NA	6	31728942	+	DDAH2	ENSG00000213722.9	6	31727038	DDAH2	1	0.0181576	-0.78367
cg03615565	-0.0197608	0.0033452	-5.9072	3.47962e-09	-0.022447	0.00387318	-5.7955	6.81194e-09	-0.0209085	0.00253167	-8.25877	1.47177e-16	0.871318	-0.0209085	0.00253167	3.55312e-14	37	16	67572595	16	66130096	R			NA	NA	FAM65A	NM_024519	Body	chr16:67571252-67572728	Island			TRUE	16:66128754-66130208			TRUE	16	67538691	-	FAM65A	ENSG00000167264.18	16	67987746	DUS2	1	0.0376494	1.8755
cg03615565	-0.0197608	0.0033452	-5.9072	3.47962e-09	-0.022447	0.00387318	-5.7955	6.81194e-09	-0.0209085	0.00253167	-8.25877	1.47177e-16	0.871318	-0.0209085	0.00253167	3.55312e-14	37	16	67572595	16	66130096	R			NA	NA	FAM65A	NM_024519	Body	chr16:67571252-67572728	Island			TRUE	16:66128754-66130208			TRUE	16	67538691	-	FAM65A	ENSG00000159720.12	16	67438014	ATP6V0D1	1	0.0173326	-0.932661
cg03628033	-0.0219727	0.00386865	-5.67968	1.34949e-08	-0.0248934	0.00384343	-6.47687	9.3645e-11	-0.0234426	0.00272659	-8.59777	8.12767e-18	0.866386	-0.0234426	0.00272659	2.4313e-15	37	14	105265909	14	104336954	F			NA	NA	ZBTB42	NM_001137601	TSS1500	chr14:105266444-105267838	N_Shore			NA		14:105265469-105266652	Unclassified	NA	14	104799571	+	ZBTB42	ENSG00000142208.16	14	104769349	AKT1	1	0.0139072	-0.561661
cg03646605	-0.028882	0.00286507	-10.0807	6.72399e-24	-0.0175203	0.00240934	-7.27184	3.54622e-13	-0.0222267	0.00184399	-12.0536	1.85708e-33	0.00999382	-0.0222267	0.00184399	7.73064e-30	37	11	86383804	11	86061452	R			NA	NA	ME3;ME3;ME3	NM_001014811;NM_001161586;NM_006680	TSS1500;TSS200;TSS1500	chr11:86382695-86383586	S_Shore			NA				NA	11	86672761	-	ME3	ENSG00000278989.1	11	86434924	AP001148.1	1	0.0270571	-0.944449
cg03646605	-0.028882	0.00286507	-10.0807	6.72399e-24	-0.0175203	0.00240934	-7.27184	3.54622e-13	-0.0222267	0.00184399	-12.0536	1.85708e-33	0.00999382	-0.0222267	0.00184399	7.73064e-30	37	11	86383804	11	86061452	R			NA	NA	ME3;ME3;ME3	NM_001014811;NM_001161586;NM_006680	TSS1500;TSS200;TSS1500	chr11:86382695-86383586	S_Shore			NA				NA	11	86672761	-	ME3	ENSG00000151376.16	11	86441108	ME3	1	0.100749	-5.14607
cg03648724	-0.0134506	0.00415898	-3.2341	0.00122027	-0.0269562	0.00429894	-6.27042	3.60066e-10	-0.0199799	0.0029891	-6.68427	2.32079e-11	0.0781539	-0.0199799	0.0029891	2.21259e-09	37	22	50052294	22	48438298	F			NA	NA	C22orf34	NR_026997	TSS1500					NA		22:50052284-50052542	Unclassified_Cell_type_specific	NA	22	49658645	+	C22orf34	ENSG00000188511.12	22	49414524	C22orf34	1	0.0318037	1.69287
cg03648724	-0.0134506	0.00415898	-3.2341	0.00122027	-0.0269562	0.00429894	-6.27042	3.60066e-10	-0.0199799	0.0029891	-6.68427	2.32079e-11	0.0781539	-0.0199799	0.0029891	2.21259e-09	37	22	50052294	22	48438298	F			NA	NA	C22orf34	NR_026997	TSS1500					NA		22:50052284-50052542	Unclassified_Cell_type_specific	NA	22	49658645	+	C22orf34	ENSG00000235111.1	22	49612657	Z97192.3	1	0.0787364	-1.78974
cg03652715	-0.011283	0.00208322	-5.41614	6.08979e-08	-0.00514306	0.00240674	-2.13694	0.0326027	-0.00865316	0.00157511	-5.49367	3.93658e-08	0.155618	-0.00865316	0.00157511	1.98508e-06	37	11	1965140	11	1921716	R			NA	NA				chr11:1968558-1969003	N_Shelf		CDMR	NA		11:1965049-1965155	Unclassified_Cell_type_specific	NA	11	1943909	-		ENSG00000214026.11	11	1947278	MRPL23	1	0.0604388	7.27041
cg03699074	-0.00749683	0.00295983	-2.53286	0.0113138	-0.0165162	0.00289863	-5.69795	1.21256e-08	-0.0121008	0.00207094	-5.84312	5.12312e-09	0.0934843	-0.0121008	0.00207094	3.09961e-07	37	16	88849875	16	87377376	F			NA	NA	FAM38A	NM_001142864	Body	chr16:88850204-88850537	N_Shore		RDMR	NA		16:88849291-88850949	Promoter_Associated	NA	16	88783466	+	FAM38A	ENSG00000278341.1	16	88708956	AC138028.6	1	0.0155659	-1.12257
cg03718845	-0.0183651	0.00414445	-4.43124	9.36922e-06	-0.0328981	0.00444131	-7.40729	1.2891e-13	-0.0251297	0.00303008	-8.29339	1.10069e-16	0.0571676	-0.0251297	0.00303008	2.71165e-14	37	2	85640001	2	85493512	F	rs72831569		NA	NA				chr2:85640969-85641259	N_Shore			NA				NA	2	85412877	+		ENSG00000042493.16	2	85394753	CAPG	1	0.0793076	-2.04569
cg03721978	-0.013104	0.00277986	-4.71391	2.43011e-06	-0.011109	0.00262865	-4.22613	2.37749e-05	-0.0120508	0.00190996	-6.30945	2.80028e-10	0.872887	-0.0120508	0.00190996	2.18249e-08	37	6	33245706	6	33353684	F			NA	NA	B3GALT4	NM_003782	1stExon	chr6:33244677-33245554	S_Shore			TRUE	6:33352687-33353910	6:33244505-33246488	Promoter_Associated	TRUE	6	33277928	+	B3GALT4	ENSG00000231500.7	6	33272075	RPS18	1	0.0154079	1.39899
cg03776060	-0.0162276	0.00344635	-4.70864	2.49381e-06	-0.0126325	0.00318294	-3.9688	7.22349e-05	-0.0142874	0.00233826	-6.11027	9.94646e-10	0.745548	-0.0142874	0.00233826	6.93214e-08	37	9	133972575	9	132962396	F			NA	TRUE	AIF1L	NM_031426	Body	chr9:133971670-133972578	Island			NA		9:133971240-133972595	Unclassified_Cell_type_specific	NA	9	131097187	+	AIF1L	ENSG00000126878.13	9	131096476	AIF1L	1	0.0394406	1.08105
cg03777083	-0.0169066	0.00327814	-5.15736	2.50452e-07	-0.0186585	0.00328928	-5.67252	1.40709e-08	-0.0177796	0.00232192	-7.65726	1.89946e-14	0.931309	-0.0177796	0.00232192	3.21083e-12	37	17	40932199	17	38185725	R			NA	NA	WNK4	NM_032387	TSS1500	chr17:40932329-40933299	N_Shore			NA		17:40932147-40932411	Unclassified_Cell_type_specific	TRUE	17	42780180	-	WNK4	ENSG00000126562.17	17	42780610	WNK4	1	0.0243277	-0.542046
cg03780271	-0.00623409	0.00251605	-2.47773	0.0132222	-0.0110699	0.00194067	-5.70419	1.16896e-08	-0.00926611	0.00153667	-6.02999	1.63968e-09	0.314091	-0.00926611	0.00153667	1.09153e-07	37	6	33280052	6	33388030	F			NA	NA	TAPBP;TAPBP;TAPBP	NM_172209;NM_003190;NM_172208	Body;Body;Body	chr6:33281112-33281827	N_Shore			NA				NA	6	33312274	+	TAPBP	ENSG00000030110.13	6	33572547	BAK1	1	0.0315407	-2.41042
cg03785076	-0.0185109	0.00268798	-6.88657	5.71528e-12	-0.0444216	0.00301363	-14.7402	3.55472e-49	-0.0299912	0.00200598	-14.9509	1.53617e-50	1.14836e-09	-0.0299912	0.00200598	5.26337e-46	37	2	241936915	2	241585588	R			NA	NA	SNED1	NM_001080437	TSS1500	chr2:241937716-241938468	N_Shore			TRUE				NA	2	240997497	-	SNED1	ENSG00000162804.14	2	240998618	SNED1	1	0.0183315	-2.14008
cg03857553	-0.0183534	0.00292163	-6.28189	3.34488e-10	-0.0218479	0.00273063	-8.00107	1.23345e-15	-0.0202186	0.00199495	-10.1349	3.86892e-24	0.682626	-0.0202186	0.00199495	3.16781e-21	37	22	29976613	22	28306613	F			NA	NA	NIPSNAP1	NM_003634	Body	chr22:29976920-29977216	N_Shore			NA		22:29976337-29977462	Promoter_Associated	NA	22	29580623	+	NIPSNAP1	ENSG00000184117.11	22	29554808	NIPSNAP1	1	0.0290583	-1.15222
cg03875330	-0.00516667	0.00246391	-2.09694	0.0359989	-0.0151699	0.00237403	-6.38992	1.65975e-10	-0.010354	0.00170959	-6.05646	1.39147e-09	0.0139297	-0.010354	0.00170959	9.41496e-08	37	19	11455923	19	11316923	R			NA	NA	TMEM205;TMEM205;CCDC159;TMEM205	NM_001145416;NM_033408;NM_001080503;NM_198536	Body;Body;TSS1500;Body	chr19:11456744-11457251	N_Shore			NA				NA	19	11345246	-	TMEM205;CCDC159	ENSG00000105518.14	19	11342776	TMEM205	1	0.0248754	-1.10003
cg03884592	-0.0223753	0.00585118	-3.82406	0.00013127	-0.0287562	0.00597893	-4.8096	1.51233e-06	-0.0254969	0.00418184	-6.09704	1.0805e-09	0.747589	-0.0254969	0.00418184	7.4709e-08	37	1	42384474	1	42157061	R			NA	NA	HIVEP3;HIVEP3;HIVEP3;HIVEP3	NM_001127714;NM_024503;NM_024503;NM_001127714	1stExon;1stExon;5'UTR;5'UTR	chr1:42383640-42384003	S_Shore	low-CpG:42156913-42157182		TRUE		1:42383352-42384533	Unclassified_Cell_type_specific	NA	1	41918802	-	HIVEP3	ENSG00000127124.16	1	41506365	HIVEP3	1	0.03068	-0.818992
cg03885332	-0.0183919	0.00314502	-5.84794	4.97696e-09	-0.0148219	0.00317836	-4.66338	3.11059e-06	-0.0166257	0.00223556	-7.43694	1.03046e-13	0.727069	-0.0166257	0.00223556	1.53918e-11	37	11	832357	11	822357	R			NA	NA	CD151;CD151;CD151;CD151	NM_139030;NM_004357;NM_139029;NM_001039490	TSS1500;TSS1500;TSS1500;TSS1500	chr11:829284-833558	Island			NA	11:822357-823509			TRUE	11	832356	-	CD151	ENSG00000177697.19	11	832887	CD151	1	0.0614407	-5.33671
cg03885332	-0.0183919	0.00314502	-5.84794	4.97696e-09	-0.0148219	0.00317836	-4.66338	3.11059e-06	-0.0166257	0.00223556	-7.43694	1.03046e-13	0.727069	-0.0166257	0.00223556	1.53918e-11	37	11	832357	11	822357	R			NA	NA	CD151;CD151;CD151;CD151	NM_139030;NM_004357;NM_139029;NM_001039490	TSS1500;TSS1500;TSS1500;TSS1500	chr11:829284-833558	Island			NA	11:822357-823509			TRUE	11	832356	-	CD151	ENSG00000214063.11	11	842812	TSPAN4	1	0.0165918	1.59998
cg03885332	-0.0183919	0.00314502	-5.84794	4.97696e-09	-0.0148219	0.00317836	-4.66338	3.11059e-06	-0.0166257	0.00223556	-7.43694	1.03046e-13	0.727069	-0.0166257	0.00223556	1.53918e-11	37	11	832357	11	822357	R			NA	NA	CD151;CD151;CD151;CD151	NM_139030;NM_004357;NM_139029;NM_001039490	TSS1500;TSS1500;TSS1500;TSS1500	chr11:829284-833558	Island			NA	11:822357-823509			TRUE	11	832356	-	CD151	ENSG00000177700.6	11	837356	POLR2L	1	0.0372794	1.59102
cg03887528	0.0258876	0.00355287	7.28638	3.18393e-13	0.0213807	0.00327749	6.52348	6.8693e-11	0.0234527	0.00240901	9.73539	2.12999e-22	0.647475	0.0234527	0.00240901	1.32876e-19	37	2	231090531	2	230798775	F			NA	NA	SP140;SP140;SP140;SP140	NM_007237;NM_007237;NM_001005176;NM_001005176	5'UTR;1stExon;1stExon;5'UTR					NA		2:231090068-231091293	Promoter_Associated	NA	2	230225815	+	SP140	ENSG00000079263.19	2	230203110	SP140	1	0.0453905	-2.20581
cg03890167	-0.0140409	0.00340606	-4.12232	3.75082e-05	-0.0233725	0.00405045	-5.77035	7.91075e-09	-0.0179062	0.00260687	-6.86886	6.47161e-12	0.211279	-0.0179062	0.00260687	6.87637e-10	37	1	203242638	1	201509261	F			NA	NA				chr1:203242519-203242818	Island			TRUE	1:201508899-201509375	1:203241935-203242840	Promoter_Associated	TRUE	1	203273509	+		ENSG00000233791.5	1	203298758	LINC01136	1	0.0178395	1.14481
cg03890167	-0.0140409	0.00340606	-4.12232	3.75082e-05	-0.0233725	0.00405045	-5.77035	7.91075e-09	-0.0179062	0.00260687	-6.86886	6.47161e-12	0.211279	-0.0179062	0.00260687	6.87637e-10	37	1	203242638	1	201509261	F			NA	NA				chr1:203242519-203242818	Island			TRUE	1:201508899-201509375	1:203241935-203242840	Promoter_Associated	TRUE	1	203273509	+		ENSG00000159388.6	1	203305491	BTG2	1	0.0454816	1.23482
cg03928384	0.0171967	0.0033651	5.11031	3.21633e-07	0.0141995	0.00433941	3.27223	0.00106703	0.0160712	0.00265921	6.04358	1.50733e-09	0.861614	0.0160712	0.00265921	1.01251e-07	37	3	46395191	3	46370195	R			NA	NA	CCR2;CCR2	NM_001123041;NM_001123396	TSS200;TSS200					NA				NA	3	46353699	-	CCR2	ENSG00000183625.15	3	46163604	CCR3	1	0.0172237	-1.94048
cg03936870	-0.0223442	0.00492885	-4.53335	5.80563e-06	-0.0269299	0.00440854	-6.10857	1.0053e-09	-0.0248918	0.00328592	-7.57528	3.58342e-14	0.786279	-0.0248918	0.00328592	5.74971e-12	37	2	47561578	2	47415082	R			NA	NA								NA				NA	2	47334438	-		ENSG00000095002.14	2	47402969	MSH2	1	0.0222573	-0.671987
cg03950476	-0.00996877	0.00280519	-3.55368	0.00037988	-0.0221918	0.00423323	-5.24228	1.58604e-07	-0.0136984	0.00233838	-5.85807	4.68281e-09	0.0552112	-0.0136984	0.00233838	2.85806e-07	37	1	53019814	1	52792402	R			NA	NA	ZCCHC11;ZCCHC11;ZCCHC11	NM_001009881;NM_001009882;NM_015269	TSS1500;TSS1500;TSS1500	chr1:53018258-53019599	S_Shore			NA				NA	1	52554141	-	ZCCHC11	ENSG00000154222.14	1	52345723	CC2D1B	1	0.0191191	-0.708768
cg03950476	-0.00996877	0.00280519	-3.55368	0.00037988	-0.0221918	0.00423323	-5.24228	1.58604e-07	-0.0136984	0.00233838	-5.85807	4.68281e-09	0.0552112	-0.0136984	0.00233838	2.85806e-07	37	1	53019814	1	52792402	R			NA	NA	ZCCHC11;ZCCHC11;ZCCHC11	NM_001009881;NM_001009882;NM_015269	TSS1500;TSS1500;TSS1500	chr1:53018258-53019599	S_Shore			NA				NA	1	52554141	-	ZCCHC11	ENSG00000134744.14	1	52408282	TUT4	1	0.0229011	-0.881326
cg03958883	-0.00961283	0.0029391	-3.27067	0.00107292	-0.0180388	0.00309882	-5.82118	5.84339e-09	-0.0136031	0.00213249	-6.37897	1.78283e-10	0.142832	-0.0136031	0.00213249	1.44226e-08	37	11	73020729	11	72698377	F			NA	NA	ARHGEF17	NM_014786	1stExon	chr11:73018452-73020563	S_Shore			NA	11:72698355-72699118			NA	11	73309683	+	ARHGEF17	ENSG00000054967.13	11	73376399	RELT	1	0.0177123	0.795209
cg03958883	-0.00961283	0.0029391	-3.27067	0.00107292	-0.0180388	0.00309882	-5.82118	5.84339e-09	-0.0136031	0.00213249	-6.37897	1.78283e-10	0.142832	-0.0136031	0.00213249	1.44226e-08	37	11	73020729	11	72698377	F			NA	NA	ARHGEF17	NM_014786	1stExon	chr11:73018452-73020563	S_Shore			NA	11:72698355-72699118			NA	11	73309683	+	ARHGEF17	ENSG00000110237.4	11	73308289	ARHGEF17	1	0.0303137	4.7419
cg03962527	-0.01369	0.00583785	-2.34504	0.0190248	-0.0428331	0.00592926	-7.22403	5.0469e-13	-0.0280352	0.00415992	-6.73935	1.59093e-11	0.00216902	-0.0280352	0.00415992	1.56465e-09	37	10	111766879	10	111756869	R			NA	NA	ADD3;ADD3;ADD3	NM_019903;NM_016824;NM_001121	5'UTR;TSS1500;TSS1500	chr10:111767087-111768355	N_Shore			NA	10:111756624-111758464			NA	10	110007120	-	ADD3	ENSG00000148700.14	10	109996368	ADD3	1	0.0340027	0.542334
cg03969996	-0.0218373	0.00431852	-5.05667	4.26636e-07	-0.0261916	0.00477582	-5.48422	4.1529e-08	-0.0237961	0.00320316	-7.42895	1.09463e-13	0.795595	-0.0237961	0.00320316	1.6236e-11	37	19	46999055	19	51690895	R			NA	NA	PNMAL2;PNMAL2	NM_020709;NM_020709	1stExon;5'UTR	chr19:46999028-46999290	Island			TRUE	19:51688244-51691087	19:46998994-46999364	Unclassified_Cell_type_specific	NA	19	46495797	-	PNMAL2	ENSG00000204850.4	19	46494508	AC011484.1	1	0.157042	4.39934
cg03969996	-0.0218373	0.00431852	-5.05667	4.26636e-07	-0.0261916	0.00477582	-5.48422	4.1529e-08	-0.0237961	0.00320316	-7.42895	1.09463e-13	0.795595	-0.0237961	0.00320316	1.6236e-11	37	19	46999055	19	51690895	R			NA	NA	PNMAL2;PNMAL2	NM_020709;NM_020709	1stExon;5'UTR	chr19:46999028-46999290	Island			TRUE	19:51688244-51691087	19:46998994-46999364	Unclassified_Cell_type_specific	NA	19	46495797	-	PNMAL2	ENSG00000204851.6	19	46486906	PNMA8B	1	0.100978	2.03203
cg03969996	-0.0218373	0.00431852	-5.05667	4.26636e-07	-0.0261916	0.00477582	-5.48422	4.1529e-08	-0.0237961	0.00320316	-7.42895	1.09463e-13	0.795595	-0.0237961	0.00320316	1.6236e-11	37	19	46999055	19	51690895	R			NA	NA	PNMAL2;PNMAL2	NM_020709;NM_020709	1stExon;5'UTR	chr19:46999028-46999290	Island			TRUE	19:51688244-51691087	19:46998994-46999364	Unclassified_Cell_type_specific	NA	19	46495797	-	PNMAL2	ENSG00000182013.18	19	46466491	PNMA8A	1	0.059147	1.21792
cg03995156	-0.00926362	0.00268419	-3.45119	0.000558127	-0.0109286	0.00214548	-5.0938	3.50962e-07	-0.0102796	0.00167591	-6.13373	8.58403e-10	0.88924	-0.0102796	0.00167591	6.06998e-08	37	6	32122864	6	32230842	F			NA	NA	PPT2;PPT2	NM_005155;NM_138717	Body;Body	chr6:32121829-32122529	S_Shore		RDMR	NA		6:32120376-32123743	Promoter_Associated	NA	6	32155086	+	PPT2	ENSG00000198502.6	6	32517353	HLA-DRB5	1	0.0198752	-7.28409
cg03996539	-0.0104874	0.00291302	-3.6002	0.000317975	-0.0232664	0.00415889	-5.59439	2.21401e-08	-0.0146934	0.00238595	-6.1583	7.35309e-10	0.0421305	-0.0146934	0.00238595	5.26898e-08	37	4	159094517	4	159313967	F			NA	NA	FAM198B;FAM198B;FAM198B	NM_001031700;NM_016613;NM_001128424	TSS1500;TSS1500;TSS1500					NA				NA	4	158173364	+	FAM198B	ENSG00000251429.1	4	158270378	AC098679.2	1	0.015901	-0.618797
cg03996539	-0.0104874	0.00291302	-3.6002	0.000317975	-0.0232664	0.00415889	-5.59439	2.21401e-08	-0.0146934	0.00238595	-6.1583	7.35309e-10	0.0421305	-0.0146934	0.00238595	5.26898e-08	37	4	159094517	4	159313967	F			NA	NA	FAM198B;FAM198B;FAM198B	NM_001031700;NM_016613;NM_001128424	TSS1500;TSS1500;TSS1500					NA				NA	4	158173364	+	FAM198B	ENSG00000164125.15	4	158124474	GASK1B	1	0.0303548	1.70744
cg03996539	-0.0104874	0.00291302	-3.6002	0.000317975	-0.0232664	0.00415889	-5.59439	2.21401e-08	-0.0146934	0.00238595	-6.1583	7.35309e-10	0.0421305	-0.0146934	0.00238595	5.26898e-08	37	4	159094517	4	159313967	F			NA	NA	FAM198B;FAM198B;FAM198B	NM_001031700;NM_016613;NM_001128424	TSS1500;TSS1500;TSS1500					NA				NA	4	158173364	+	FAM198B	ENSG00000248429.5	4	158170752	FAM198B-AS1	1	0.0382578	-1.62869
cg03996539	-0.0104874	0.00291302	-3.6002	0.000317975	-0.0232664	0.00415889	-5.59439	2.21401e-08	-0.0146934	0.00238595	-6.1583	7.35309e-10	0.0421305	-0.0146934	0.00238595	5.26898e-08	37	4	159094517	4	159313967	F			NA	NA	FAM198B;FAM198B;FAM198B	NM_001031700;NM_016613;NM_001128424	TSS1500;TSS1500;TSS1500					NA				NA	4	158173364	+	FAM198B	ENSG00000164124.10	4	158201604	TMEM144	1	0.0406845	-1.92087
cg03996822	-0.010941	0.00434753	-2.51661	0.0118489	-0.0280931	0.0041649	-6.7452	1.52816e-11	-0.0198849	0.00300752	-6.61172	3.7989e-11	0.0172812	-0.0198849	0.00300752	3.46741e-09	37	4	74486558	4	74705422	R			NA	TRUE	RASSF6;RASSF6	NM_177532;NM_201431	TSS1500;TSS1500	chr4:74486044-74486258	S_Shore			TRUE				NA	4	73620840	-	RASSF6	ENSG00000169435.14	4	73571550	RASSF6	1	0.0154234	-0.668886
cg04002220	0.0140141	0.0028956	4.83979	1.29974e-06	0.0115438	0.00239675	4.81642	1.4616e-06	0.0125481	0.00184632	6.79629	1.07349e-11	0.805762	0.0125481	0.00184632	1.09142e-09	37	16	89598305	16	88125806	R			NA	NA	SPG7;SPG7	NM_003119;NM_199367	Body;Body					NA	16:88125806-88126517			NA	16	89531896	-	SPG7	ENSG00000197912.15	16	89490719	SPG7	1	0.0323321	-0.969304
cg04035392	-0.00700621	0.00284437	-2.46319	0.0137708	-0.0138536	0.00195403	-7.08974	1.34368e-12	-0.0116581	0.00161059	-7.2384	4.53999e-13	0.139654	-0.0116581	0.00161059	5.99524e-11	37	3	47866155	3	47841159	F		rs13072132	NA	NA	DHX30;DHX30	NM_138615;NM_014966	Body;Body	chr3:47866474-47866882	N_Shore			NA		3:47865758-47867319	Promoter_Associated	NA	3	47824664	+	DHX30	ENSG00000164048.14	3	48241100	ZNF589	1	0.0271776	-2.11507
cg04035392	-0.00700621	0.00284437	-2.46319	0.0137708	-0.0138536	0.00195403	-7.08974	1.34368e-12	-0.0116581	0.00161059	-7.2384	4.53999e-13	0.139654	-0.0116581	0.00161059	5.99524e-11	37	3	47866155	3	47841159	F		rs13072132	NA	NA	DHX30;DHX30	NM_138615;NM_014966	Body;Body	chr3:47866474-47866882	N_Shore			NA		3:47865758-47867319	Promoter_Associated	NA	3	47824664	+	DHX30	ENSG00000047849.21	3	47850690	MAP4	1	0.0162804	1.01037
cg04036898	-0.0149095	0.00285713	-5.21834	1.80537e-07	-0.0178173	0.00302068	-5.89843	3.66972e-09	-0.0162825	0.00207571	-7.84433	4.35287e-15	0.783058	-0.0162825	0.00207571	8.18424e-13	37	1	46664598	1	46437185	R			NA	TRUE	POMGNT1;POMGNT1	NR_024332;NM_017739	Body;TSS1500					NA		1:46663389-46664686	Promoter_Associated	NA	1	46198925	-	POMGNT1	ENSG00000085998.14	1	46188682	POMGNT1	1	0.0225303	0.713717
cg04036898	-0.0149095	0.00285713	-5.21834	1.80537e-07	-0.0178173	0.00302068	-5.89843	3.66972e-09	-0.0162825	0.00207571	-7.84433	4.35287e-15	0.783058	-0.0162825	0.00207571	8.18424e-13	37	1	46664598	1	46437185	R			NA	TRUE	POMGNT1;POMGNT1	NR_024332;NM_017739	Body;TSS1500					NA		1:46663389-46664686	Promoter_Associated	NA	1	46198925	-	POMGNT1	ENSG00000171357.6	1	46203334	LURAP1	1	0.0244198	-0.839884
cg04042468	-0.0196596	0.00523262	-3.75714	0.000171869	-0.0380744	0.00668988	-5.69134	1.26048e-08	-0.0266493	0.00412159	-6.46579	1.0077e-10	0.0953241	-0.0266493	0.00412159	8.52676e-09	37	22	43506033	22	41835977	R			NA	NA	BIK	NM_001197	TSS1500	chr22:43505951-43506167	Island			NA	22:41835953-41836139			NA	22	43110026	-	BIK	ENSG00000100290.3	22	43110750	BIK	1	0.0169396	0.755816
cg04050728	-0.00629166	0.00321478	-1.95711	0.050335	-0.0197813	0.00335304	-5.89951	3.64584e-09	-0.0127526	0.00232053	-5.49557	3.8946e-08	0.0147485	-0.0127526	0.00232053	1.96525e-06	37	16	776416	16	716417	F	rs78868437	rs78969045	NA	NA	CCDC78;HAGHL;CCDC78;HAGHL	NM_001031737;NM_032304;NM_001031737;NM_207112	5'UTR;TSS1500;1stExon;TSS1500	chr16:776636-779417	N_Shore			NA		16:775447-776443	Unclassified_Cell_type_specific	NA	16	726415	+	CCDC78;HAGHL	ENSG00000103245.14	16	729760	CIAO3	1	0.0308506	1.03812
cg04050728	-0.00629166	0.00321478	-1.95711	0.050335	-0.0197813	0.00335304	-5.89951	3.64584e-09	-0.0127526	0.00232053	-5.49557	3.8946e-08	0.0147485	-0.0127526	0.00232053	1.96525e-06	37	16	776416	16	716417	F	rs78868437	rs78969045	NA	NA	CCDC78;HAGHL;CCDC78;HAGHL	NM_001031737;NM_032304;NM_001031737;NM_207112	5'UTR;TSS1500;1stExon;TSS1500	chr16:776636-779417	N_Shore			NA		16:775447-776443	Unclassified_Cell_type_specific	NA	16	726415	+	CCDC78;HAGHL	ENSG00000103260.9	16	715118	METRN	1	0.0162645	1.19651
cg04055490	-0.0127335	0.00311406	-4.08903	4.33185e-05	-0.0233339	0.00349527	-6.67586	2.45785e-11	-0.0174243	0.00232511	-7.49397	6.68204e-14	0.077009	-0.0174243	0.00232511	1.02454e-11	37	17	8059012	17	7999737	R			NA	NA				chr17:8059556-8060237	N_Shore		RDMR	NA		17:8058935-8059088	Promoter_Associated	NA	17	8155693	-		ENSG00000178971.15	17	8224815	CTC1	1	0.0415901	-1.28228
cg04055490	-0.0127335	0.00311406	-4.08903	4.33185e-05	-0.0233339	0.00349527	-6.67586	2.45785e-11	-0.0174243	0.00232511	-7.49397	6.68204e-14	0.077009	-0.0174243	0.00232511	1.02454e-11	37	17	8059012	17	7999737	R			NA	NA				chr17:8059556-8060237	N_Shore		RDMR	NA		17:8058935-8059088	Promoter_Associated	NA	17	8155693	-		ENSG00000220205.9	17	8159149	VAMP2	1	0.0187399	-0.564561
cg04065210	-0.00714596	0.00297305	-2.40357	0.0162357	-0.0174232	0.00327918	-5.31327	1.07674e-07	-0.0117826	0.00220256	-5.34949	8.82041e-08	0.0675077	-0.0117826	0.00220256	4.13685e-06	37	7	35074628	7	35041153	R			NA	NA	DPY19L1	NM_015283	Body	chr7:35076136-35077808	N_Shore			NA		7:35074501-35074709	Unclassified_Cell_type_specific	NA	7	35035015	-	DPY19L1	ENSG00000173852.14	7	34928876	DPY19L1	1	0.0653883	-1.85964
cg04067066	-0.0116307	0.00308674	-3.76795	0.000164593	-0.0165888	0.0031116	-5.33126	9.75335e-08	-0.0140898	0.00219139	-6.42963	1.27918e-10	0.527375	-0.0140898	0.00219139	1.06003e-08	37	2	219756890	2	219465134	R			NA	NA	WNT10A	NM_025216	Body	chr2:219757458-219758001	N_Shore			NA				NA	2	218892167	-	WNT10A	ENSG00000135925.9	2	218880852	WNT10A	1	0.0138282	-1.43027
cg04070692	-0.0084457	0.00229935	-3.67308	0.000239642	-0.00928928	0.00199088	-4.66592	3.07242e-06	-0.00892783	0.0015051	-5.93173	2.99762e-09	0.962266	-0.00892783	0.0015051	1.89255e-07	37	10	135120640	10	134970630	R			NA	NA	TUBGCP2	NM_006659	5'UTR	chr10:135121991-135122669	N_Shore			NA	10:134970577-134970652			NA	10	133307135	-	TUBGCP2	ENSG00000273980.1	10	133257144	AL592071.1	1	0.0168843	0.889299
cg04070976	0.0203068	0.00360172	5.63809	1.7195e-08	0.0104738	0.00420012	2.49369	0.0126424	0.0161401	0.00273411	5.90323	3.56452e-09	0.206143	0.0161401	0.00273411	2.22398e-07	37	17	73577422	17	71089017	F			NA	NA								NA	17:71088978-71089340			NA	17	75581340	+		ENSG00000266714.9	17	75588058	MYO15B	1	0.110478	-3.69694
cg04070976	0.0203068	0.00360172	5.63809	1.7195e-08	0.0104738	0.00420012	2.49369	0.0126424	0.0161401	0.00273411	5.90323	3.56452e-09	0.206143	0.0161401	0.00273411	2.22398e-07	37	17	73577422	17	71089017	F			NA	NA								NA	17:71088978-71089340			NA	17	75581340	+		ENSG00000073350.13	17	75525080	LLGL2	1	0.018756	-1.20315
cg04074908	-0.0083554	0.00228413	-3.65802	0.000254173	-0.0122678	0.00215748	-5.68618	1.29909e-08	-0.0104231	0.00156843	-6.64554	3.02105e-11	0.460572	-0.0104231	0.00156843	2.81218e-09	37	6	44101190	6	44209168	F			NA	NA	TMEM63B	NM_018426	5'UTR					TRUE				TRUE	6	44133452	+	TMEM63B	ENSG00000146232.16	6	44258166	NFKBIE	1	0.0146593	-1.07623
cg04080022	-0.0181635	0.00297066	-6.11431	9.69785e-10	-0.0169494	0.00298421	-5.67968	1.34951e-08	-0.0175592	0.00210535	-8.34028	7.41138e-17	0.959281	-0.0175592	0.00210535	1.88488e-14	37	16	89648534	16	88176035	R			NA	NA	CPNE7;CPNE7	NM_014427;NM_153636	Body;Body	chr16:89650417-89650697	N_Shore			TRUE				TRUE	16	89582125	-	CPNE7	ENSG00000204991.11	16	89818179	SPIRE2	1	0.0178579	-1.44698
cg04104776	-0.0242275	0.00425334	-5.69611	1.22568e-08	-0.0190733	0.00490071	-3.89195	9.94428e-05	-0.0220131	0.00321224	-6.85289	7.23737e-12	0.729459	-0.0220131	0.00321224	7.61194e-10	37	17	3439336	17	3386086	F			NA	NA	TRPV3	NM_145068	Body	chr17:3438841-3439046	S_Shore			TRUE	17:3385617-3386087	17:3438759-3439956	Unclassified	TRUE	17	3536041	+	TRPV3	ENSG00000167723.14	17	3510502	TRPV3	1	0.0248167	-1.26453
cg04111478	-0.0148029	0.00394861	-3.74889	0.00017762	-0.0202265	0.00421093	-4.80334	1.56043e-06	-0.0173405	0.00288036	-6.02026	1.74142e-09	0.643156	-0.0173405	0.00288036	1.15357e-07	37	11	1991677	11	1948253	F			NA	NA				chr11:1990899-1991211	S_Shore			NA	11:1948110-1948605			NA	11	1970446	+		ENSG00000214026.11	11	1947278	MRPL23	1	0.0223357	-2.47632
cg04138881	-0.0154778	0.00379569	-4.07772	4.54793e-05	-0.0130958	0.00370882	-3.53099	0.000414006	-0.0142592	0.00265271	-5.37534	7.64401e-08	0.904173	-0.0142592	0.00265271	3.62867e-06	37	16	1477870	16	1417871	R			NA	NA	C16orf91	NM_001010878	Body	chr16:1478221-1478812	N_Shore			NA	16:1417871-1418768	16:1477868-1479076	Unclassified_Cell_type_specific	TRUE	16	1427868	-	C16orf91	ENSG00000279930.1	16	1437154	AL032819.2	1	0.0675848	-2.1174
cg04149578	-0.0205228	0.00381747	-5.37601	7.61552e-08	-0.0236405	0.00426731	-5.53992	3.02607e-08	-0.0219087	0.00284515	-7.70037	1.35673e-14	0.862211	-0.0219087	0.00284515	2.34867e-12	37	10	134202519	10	134052509	R			NA	NA								TRUE	10:134051572-134052709	10:134202412-134203338	Unclassified_Cell_type_specific	NA	10	132389014	-		ENSG00000148814.18	10	132332154	LRRC27	1	0.0182631	-1.10352
cg04149578	-0.0205228	0.00381747	-5.37601	7.61552e-08	-0.0236405	0.00426731	-5.53992	3.02607e-08	-0.0219087	0.00284515	-7.70037	1.35673e-14	0.862211	-0.0219087	0.00284515	2.34867e-12	37	10	134202519	10	134052509	R			NA	NA								TRUE	10:134051572-134052709	10:134202412-134203338	Unclassified_Cell_type_specific	NA	10	132389014	-		ENSG00000165752.17	10	132207492	STK32C	1	0.0264212	-1.48082
cg04156383	-0.0144098	0.00308025	-4.67814	2.89495e-06	-0.0111921	0.00282662	-3.95954	7.50941e-05	-0.0126631	0.00208263	-6.08034	1.19929e-09	0.74364	-0.0126631	0.00208263	8.22584e-08	37	1	144995889	1	143707246	F	rs12093115	rs12117998	NA	NA	PDE4DIP;PDE4DIP;PDE4DIP;PDE4DIP	NM_022359;NM_014644;NM_001002810;NM_001002812	Body;TSS1500;TSS1500;TSS1500					NA		1:144995876-144996168	Unclassified	NA	1	120621652	+	PDE4DIP	ENSG00000285215.2	1	120963645	AC241377.4	1	0.0169867	0.78068
cg04156383	-0.0144098	0.00308025	-4.67814	2.89495e-06	-0.0111921	0.00282662	-3.95954	7.50941e-05	-0.0126631	0.00208263	-6.08034	1.19929e-09	0.74364	-0.0126631	0.00208263	8.22584e-08	37	1	144995889	1	143707246	F	rs12093115	rs12117998	NA	NA	PDE4DIP;PDE4DIP;PDE4DIP;PDE4DIP	NM_022359;NM_014644;NM_001002810;NM_001002812	Body;TSS1500;TSS1500;TSS1500					NA		1:144995876-144996168	Unclassified	NA	1	120621652	+	PDE4DIP	ENSG00000270231.4	1	120419850	NBPF8	1	0.0402055	-3.73738
cg04156383	-0.0144098	0.00308025	-4.67814	2.89495e-06	-0.0111921	0.00282662	-3.95954	7.50941e-05	-0.0126631	0.00208263	-6.08034	1.19929e-09	0.74364	-0.0126631	0.00208263	8.22584e-08	37	1	144995889	1	143707246	F	rs12093115	rs12117998	NA	NA	PDE4DIP;PDE4DIP;PDE4DIP;PDE4DIP	NM_022359;NM_014644;NM_001002810;NM_001002812	Body;TSS1500;TSS1500;TSS1500					NA		1:144995876-144996168	Unclassified	NA	1	120621652	+	PDE4DIP	ENSG00000281741.2	1	120913151	AC241377.3	1	0.0203448	2.55133
cg04165759	-0.0195064	0.00502362	-3.88293	0.000103203	-0.0118728	0.00297333	-3.99309	6.52169e-05	-0.0138532	0.00255874	-5.41406	6.16132e-08	0.425287	-0.0138532	0.00255874	2.98268e-06	37	1	150448943	1	148715567	F			NA	NA	RPRD2	NM_015203	3'UTR					TRUE				NA	1	150476466	+	RPRD2	ENSG00000266472.5	1	150293720	MRPS21	1	0.0272565	0.661809
cg04180462	0.0134683	0.00243926	5.52146	3.36201e-08	0.00785908	0.00225036	3.49237	0.00047875	0.0104381	0.001654	6.31083	2.77551e-10	0.239713	0.0104381	0.001654	2.16546e-08	37	11	107993298	11	107498508	F	rs57663127		NA	NA	ACAT1	NM_000019	Body	chr11:107992004-107992731	S_Shore		RDMR	NA				NA	11	108122570	+	ACAT1	ENSG00000075239.13	11	108121516	ACAT1	1	0.0351456	-2.0525
cg04185310	0.0110077	0.0029097	3.78311	0.000154879	0.0123992	0.00301134	4.11749	3.83019e-05	0.0116796	0.00209248	5.58169	2.38193e-08	0.946286	0.0116796	0.00209248	1.25586e-06	37	2	47717244	2	47570748	F	rs77473616		NA	NA								NA				NA	2	47490104	+		ENSG00000095002.14	2	47402969	MSH2	1	0.0315593	1.30202
cg04191712	-0.0166445	0.00268772	-6.19278	5.91111e-10	-0.017801	0.00289016	-6.15917	7.31257e-10	-0.0171808	0.00196818	-8.72927	2.56327e-18	0.957976	-0.0171808	0.00196818	8.30348e-16	37	11	67399029	11	67155605	F			NA	NA	TBX10	NM_005995	3'UTR	chr11:67396844-67398294	S_Shore			NA				NA	11	67631557	+	TBX10	ENSG00000132744.8	11	67642555	ACY3	1	0.0492901	-2.93439
cg04191712	-0.0166445	0.00268772	-6.19278	5.91111e-10	-0.017801	0.00289016	-6.15917	7.31257e-10	-0.0171808	0.00196818	-8.72927	2.56327e-18	0.957976	-0.0171808	0.00196818	8.30348e-16	37	11	67399029	11	67155605	F			NA	NA	TBX10	NM_005995	3'UTR	chr11:67396844-67398294	S_Shore			NA				NA	11	67631557	+	TBX10	ENSG00000231793.5	11	67612651	DOC2GP	1	0.0210164	-3.10679
cg04200607	-0.0135165	0.00344724	-3.92097	8.81922e-05	-0.0140452	0.00377762	-3.718	0.000200809	-0.0137567	0.00254637	-5.40248	6.5724e-08	0.994672	-0.0137567	0.00254637	3.16414e-06	37	10	72163475	10	71833481	F			NA	NA	EIF4EBP2	NM_004096	TSS1500	chr10:72163717-72164573	N_Shore			NA				NA	10	70403718	+	EIF4EBP2	ENSG00000280401.1	10	70434829	AC022532.1	1	0.0186963	-0.924739
cg04213163	-0.0128091	0.00260131	-4.92409	8.47538e-07	-0.0167226	0.00282864	-5.91191	3.38159e-09	-0.0146023	0.00191473	-7.62629	2.4161e-14	0.595382	-0.0146023	0.00191473	4.00065e-12	37	1	226905595	1	224972218	R			NA	NA	ITPKB	NM_002221	Body					TRUE				NA	1	226717893	-	ITPKB	ENSG00000163050.17	1	226897536	COQ8A	1	0.0138682	-0.934398
cg04231636	-0.0123105	0.00323749	-3.80247	0.000143261	-0.0218004	0.00305927	-7.12601	1.03321e-12	-0.0173238	0.00222357	-7.791	6.64829e-15	0.103356	-0.0173238	0.00222357	1.21463e-12	37	6	18186411	6	18294390	F			NA	NA	KDM1B	NM_153042	Body					TRUE				NA	6	18186179	+	KDM1B	ENSG00000165097.15	6	18155329	KDM1B	1	0.027978	-1.2267
cg04242898	-0.00594094	0.00237658	-2.49979	0.0124269	-0.0236162	0.00249859	-9.45182	3.32983e-21	-0.0143365	0.00172202	-8.32543	8.40254e-17	1.97179e-06	-0.0143365	0.00172202	2.1121e-14	37	22	43043131	22	41373075	F	rs5996204		NA	NA	CYB5R3;CYB5R3;CYB5R3	NM_007326;NM_000398;NM_001129819	TSS200;Body;TSS200	chr22:43045009-43045679	N_Shore			NA				NA	22	42647124	+	CYB5R3	ENSG00000100243.21	22	42617840	CYB5R3	1	0.0187361	-1.05602
cg04255201	-0.0147595	0.00295566	-4.99364	5.92515e-07	-0.0112565	0.00295311	-3.81175	0.000137989	-0.0130065	0.00208906	-6.22599	4.78531e-10	0.703655	-0.0130065	0.00208906	3.55718e-08	37	19	46999307	19	51691147	R		rs73942484	NA	NA	PNMAL2	NM_020709	TSS200	chr19:46996327-46998437	S_Shore			NA		19:46998994-46999364	Unclassified_Cell_type_specific	TRUE	19	46496049	-	PNMAL2	ENSG00000204851.6	19	46486906	PNMA8B	1	0.0545241	2.90991
cg04255201	-0.0147595	0.00295566	-4.99364	5.92515e-07	-0.0112565	0.00295311	-3.81175	0.000137989	-0.0130065	0.00208906	-6.22599	4.78531e-10	0.703655	-0.0130065	0.00208906	3.55718e-08	37	19	46999307	19	51691147	R		rs73942484	NA	NA	PNMAL2	NM_020709	TSS200	chr19:46996327-46998437	S_Shore			NA		19:46998994-46999364	Unclassified_Cell_type_specific	TRUE	19	46496049	-	PNMAL2	ENSG00000182013.18	19	46466491	PNMA8A	1	0.0244528	1.52611
cg04255201	-0.0147595	0.00295566	-4.99364	5.92515e-07	-0.0112565	0.00295311	-3.81175	0.000137989	-0.0130065	0.00208906	-6.22599	4.78531e-10	0.703655	-0.0130065	0.00208906	3.55718e-08	37	19	46999307	19	51691147	R		rs73942484	NA	NA	PNMAL2	NM_020709	TSS200	chr19:46996327-46998437	S_Shore			NA		19:46998994-46999364	Unclassified_Cell_type_specific	TRUE	19	46496049	-	PNMAL2	ENSG00000204850.4	19	46494508	AC011484.1	1	0.0891753	6.46058
cg04257263	-0.012862	0.00237586	-5.41361	6.17655e-08	-0.0178844	0.00305276	-5.85844	4.67223e-09	-0.0147565	0.00187495	-7.87038	3.53567e-15	0.430481	-0.0147565	0.00187495	6.73877e-13	37	16	127088	16	67088	F			NA	NA	MPG;MPG;MPG;MPG	NM_001015054;NM_002434;NM_001015054;NM_001015052	5'UTR;TSS1500;1stExon;TSS1500	chr16:127448-128631	N_Shore			NA				NA	16	77088	+	MPG	ENSG00000233614.6	16	11555	DDX11L10	1	0.0196636	8.57369
cg04267101	-0.0118124	0.00296878	-3.97886	6.92459e-05	-0.0110496	0.00310431	-3.55943	0.00037166	-0.011448	0.00214556	-5.33567	9.51934e-08	0.984355	-0.011448	0.00214556	4.42968e-06	37	17	48619037	17	45974036	R		rs12937447	NA	NA	EPN3	NM_017957	Body	chr17:48619111-48619794	N_Shore			TRUE		17:48618647-48620579	Promoter_Associated	NA	17	50541675	-	EPN3	ENSG00000006282.21	17	50543058	SPATA20	1	0.0218497	-2.8923
cg04293307	-0.0146524	0.00420155	-3.48737	0.000487794	-0.0276288	0.00611223	-4.52024	6.17685e-06	-0.0188164	0.00346241	-5.43447	5.49598e-08	0.216438	-0.0188164	0.00346241	2.68775e-06	37	17	63553581	17	60984043	F			NA	NA	AXIN2	NM_004655	Body	chr17:63555902-63557362	N_Shelf			NA		17:63552359-63553836	Promoter_Associated	TRUE	17	65557462	+	AXIN2	ENSG00000168646.13	17	65528563	AXIN2	1	0.0223224	-0.902808
cg04295144	-0.0337044	0.00672127	-5.01459	5.31462e-07	-0.0461096	0.00668668	-6.89573	5.35902e-12	-0.039939	0.00474038	-8.42527	3.59919e-17	0.424858	-0.039939	0.00474038	9.60819e-15	37	19	10407184	19	10268184	R			NA	NA	ICAM5	NM_003259	Body	chr19:10406934-10407342	Island			NA	19:10267771-10268325			NA	19	10296507	-	ICAM5	ENSG00000105376.5	19	10289952	ICAM5	1	0.0376818	1.02441
cg04297819	-0.0121569	0.00299072	-4.06487	4.80586e-05	-0.0128377	0.00305299	-4.20497	2.61118e-05	-0.0124903	0.00213644	-5.84633	5.02536e-09	0.987392	-0.0124903	0.00213644	3.04791e-07	37	1	22260125	1	22132712	R			NA	NA	HSPG2	NM_005529	Body					TRUE				NA	1	21933631	-	HSPG2	ENSG00000283234.1	1	21950679	AL590556.2	1	0.0157854	0.722342
cg04297819	-0.0121569	0.00299072	-4.06487	4.80586e-05	-0.0128377	0.00305299	-4.20497	2.61118e-05	-0.0124903	0.00213644	-5.84633	5.02536e-09	0.987392	-0.0124903	0.00213644	3.04791e-07	37	1	22260125	1	22132712	R			NA	NA	HSPG2	NM_005529	Body					TRUE				NA	1	21933631	-	HSPG2	ENSG00000070831.16	1	22025511	CDC42	1	0.0214836	-0.755874
cg04297819	-0.0121569	0.00299072	-4.06487	4.80586e-05	-0.0128377	0.00305299	-4.20497	2.61118e-05	-0.0124903	0.00213644	-5.84633	5.02536e-09	0.987392	-0.0124903	0.00213644	3.04791e-07	37	1	22260125	1	22132712	R			NA	NA	HSPG2	NM_005529	Body					TRUE				NA	1	21933631	-	HSPG2	ENSG00000142798.20	1	21822244	HSPG2	1	0.0525731	-3.04727
cg04311403	-0.0210858	0.00432259	-4.87805	1.07139e-06	-0.0220425	0.00442531	-4.981	6.32557e-07	-0.0215529	0.00309221	-6.97007	3.16787e-12	0.988113	-0.0215529	0.00309221	3.57857e-10	37	1	236559646	1	234626269	F			NA	NA	EDARADD;EDARADD	NM_080738;NM_145861	Body;Body	chr1:236558459-236559336	S_Shore			NA	1:234626233-234626299			NA	1	236396345	+	EDARADD	ENSG00000186197.14	1	236348257	EDARADD	1	0.019551	-1.00999
cg04311403	-0.0210858	0.00432259	-4.87805	1.07139e-06	-0.0220425	0.00442531	-4.981	6.32557e-07	-0.0215529	0.00309221	-6.97007	3.16787e-12	0.988113	-0.0215529	0.00309221	3.57857e-10	37	1	236559646	1	234626269	F			NA	NA	EDARADD;EDARADD	NM_080738;NM_145861	Body;Body	chr1:236558459-236559336	S_Shore			NA	1:234626233-234626299			NA	1	236396345	+	EDARADD	ENSG00000244457.2	1	236483165	ENO1P1	1	0.0158135	-0.817001
cg04344749	-0.00383495	0.00207948	-1.84419	0.065155	-0.0206089	0.00247481	-8.32747	8.2591e-17	-0.0107768	0.00159206	-6.76905	1.29629e-11	1.42144e-06	-0.0107768	0.00159206	1.29228e-09	37	1	25871814	1	25744401	F	rs75323356		NA	NA	LDLRAP1	NM_015627	Body	chr1:25869893-25871042	S_Shore			NA				NA	1	25545322	+	LDLRAP1	ENSG00000162430.17	1	25800176	SELENON	1	0.0142394	-0.844724
cg04344749	-0.00383495	0.00207948	-1.84419	0.065155	-0.0206089	0.00247481	-8.32747	8.2591e-17	-0.0107768	0.00159206	-6.76905	1.29629e-11	1.42144e-06	-0.0107768	0.00159206	1.29228e-09	37	1	25871814	1	25744401	F	rs75323356		NA	NA	LDLRAP1	NM_015627	Body	chr1:25869893-25871042	S_Shore			NA				NA	1	25545322	+	LDLRAP1	ENSG00000117643.14	1	25617468	MAN1C1	1	0.0330879	-2.37239
cg04359840	-0.0218059	0.0038462	-5.66946	1.43248e-08	-0.0351121	0.00385722	-9.10297	8.78975e-20	-0.02844	0.00272356	-10.4422	1.59084e-25	0.0506084	-0.02844	0.00272356	1.67912e-22	37	16	17563300	16	17470801	F			NA	NA	XYLT1	NM_022166	Body				RDMR	TRUE				TRUE	16	17469442	+	XYLT1	ENSG00000103489.11	16	17101769	XYLT1	1	0.0270831	-0.999624
cg04436971	-0.0161695	0.00285975	-5.65418	1.56596e-08	-0.011196	0.00244916	-4.57137	4.8455e-06	-0.0133004	0.0018602	-7.14998	8.6788e-13	0.41794	-0.0133004	0.0018602	1.09016e-10	37	16	30016811	16	29924312	F			NA	NA	INO80E	NM_173618	3'UTR					NA	16:29924210-29924413	16:30016115-30017954	Unclassified	NA	16	30005489	+	INO80E	ENSG00000102882.12	16	30114105	MAPK3	1	0.0206747	-1.068
cg04436971	-0.0161695	0.00285975	-5.65418	1.56596e-08	-0.011196	0.00244916	-4.57137	4.8455e-06	-0.0133004	0.0018602	-7.14998	8.6788e-13	0.41794	-0.0133004	0.0018602	1.09016e-10	37	16	30016811	16	29924312	F			NA	NA	INO80E	NM_173618	3'UTR					NA	16:29924210-29924413	16:30016115-30017954	Unclassified	NA	16	30005489	+	INO80E	ENSG00000169592.15	16	29995715	INO80E	1	0.0207765	-0.972283
cg04439458	-0.0221939	0.00404464	-5.48726	4.08225e-08	-0.0224948	0.00341882	-6.57969	4.71422e-11	-0.0223694	0.00261101	-8.56733	1.05914e-17	0.998388	-0.0223694	0.00261101	3.09554e-15	37	5	138467593	5	138495492	R	rs77557490		NA	NA	SIL1;SIL1	NM_001037633;NM_022464	5'UTR;5'UTR					TRUE				NA	5	139131903	-	SIL1	ENSG00000253404.1	5	138744434	AC034243.1	1	0.0229645	-0.0428184
cg04467589	-0.0246598	0.00449249	-5.48912	4.03934e-08	-0.0159234	0.00418307	-3.80664	0.00014087	-0.0199804	0.00306142	-6.52651	6.7318e-11	0.363206	-0.0199804	0.00306142	5.86325e-09	37	6	30044105	6	30152084	F			NA	NA	RNF39;RNF39	NM_025236;NM_170769	TSS1500;TSS1500	chr6:30042918-30043500	S_Shore			NA		6:30042516-30044199	Unclassified	TRUE	6	30076327	+	RNF39	ENSG00000204644.9	6	29672392	ZFP57	1	0.044764	-6.16216
cg04467589	-0.0246598	0.00449249	-5.48912	4.03934e-08	-0.0159234	0.00418307	-3.80664	0.00014087	-0.0199804	0.00306142	-6.52651	6.7318e-11	0.363206	-0.0199804	0.00306142	5.86325e-09	37	6	30044105	6	30152084	F			NA	NA	RNF39;RNF39	NM_025236;NM_170769	TSS1500;TSS1500	chr6:30042918-30043500	S_Shore			NA		6:30042516-30044199	Unclassified	TRUE	6	30076327	+	RNF39	ENSG00000204610.13	6	30163206	TRIM15	1	0.0258906	-0.757389
cg04467589	-0.0246598	0.00449249	-5.48912	4.03934e-08	-0.0159234	0.00418307	-3.80664	0.00014087	-0.0199804	0.00306142	-6.52651	6.7318e-11	0.363206	-0.0199804	0.00306142	5.86325e-09	37	6	30044105	6	30152084	F			NA	NA	RNF39;RNF39	NM_025236;NM_170769	TSS1500;TSS1500	chr6:30042918-30043500	S_Shore			NA		6:30042516-30044199	Unclassified	TRUE	6	30076327	+	RNF39	ENSG00000204642.14	6	29722775	HLA-F	1	0.0164068	-0.964491
cg04467589	-0.0246598	0.00449249	-5.48912	4.03934e-08	-0.0159234	0.00418307	-3.80664	0.00014087	-0.0199804	0.00306142	-6.52651	6.7318e-11	0.363206	-0.0199804	0.00306142	5.86325e-09	37	6	30044105	6	30152084	F			NA	NA	RNF39;RNF39	NM_025236;NM_170769	TSS1500;TSS1500	chr6:30042918-30043500	S_Shore			NA		6:30042516-30044199	Unclassified	TRUE	6	30076327	+	RNF39	ENSG00000204623.9	6	30001011	ZNRD1ASP	1	0.0183816	0.769887
cg04467589	-0.0246598	0.00449249	-5.48912	4.03934e-08	-0.0159234	0.00418307	-3.80664	0.00014087	-0.0199804	0.00306142	-6.52651	6.7318e-11	0.363206	-0.0199804	0.00306142	5.86325e-09	37	6	30044105	6	30152084	F			NA	NA	RNF39;RNF39	NM_025236;NM_170769	TSS1500;TSS1500	chr6:30042918-30043500	S_Shore			NA		6:30042516-30044199	Unclassified	TRUE	6	30076327	+	RNF39	ENSG00000281831.1	6	29871895	AL645929.2	1	0.0479986	-2.14032
cg04467589	-0.0246598	0.00449249	-5.48912	4.03934e-08	-0.0159234	0.00418307	-3.80664	0.00014087	-0.0199804	0.00306142	-6.52651	6.7318e-11	0.363206	-0.0199804	0.00306142	5.86325e-09	37	6	30044105	6	30152084	F			NA	NA	RNF39;RNF39	NM_025236;NM_170769	TSS1500;TSS1500	chr6:30042918-30043500	S_Shore			NA		6:30042516-30044199	Unclassified	TRUE	6	30076327	+	RNF39	ENSG00000181126.13	6	29790954	HLA-V	1	0.0141133	2.41397
cg04467589	-0.0246598	0.00449249	-5.48912	4.03934e-08	-0.0159234	0.00418307	-3.80664	0.00014087	-0.0199804	0.00306142	-6.52651	6.7318e-11	0.363206	-0.0199804	0.00306142	5.86325e-09	37	6	30044105	6	30152084	F			NA	NA	RNF39;RNF39	NM_025236;NM_170769	TSS1500;TSS1500	chr6:30042918-30043500	S_Shore			NA		6:30042516-30044199	Unclassified	TRUE	6	30076327	+	RNF39	ENSG00000237669.1	6	30006121	AL671277.2	1	0.0803741	-2.57406
cg04467589	-0.0246598	0.00449249	-5.48912	4.03934e-08	-0.0159234	0.00418307	-3.80664	0.00014087	-0.0199804	0.00306142	-6.52651	6.7318e-11	0.363206	-0.0199804	0.00306142	5.86325e-09	37	6	30044105	6	30152084	F			NA	NA	RNF39;RNF39	NM_025236;NM_170769	TSS1500;TSS1500	chr6:30042918-30043500	S_Shore			NA		6:30042516-30044199	Unclassified	TRUE	6	30076327	+	RNF39	ENSG00000230795.3	6	29926459	HLA-K	1	0.0293999	2.14826
cg04467589	-0.0246598	0.00449249	-5.48912	4.03934e-08	-0.0159234	0.00418307	-3.80664	0.00014087	-0.0199804	0.00306142	-6.52651	6.7318e-11	0.363206	-0.0199804	0.00306142	5.86325e-09	37	6	30044105	6	30152084	F			NA	NA	RNF39;RNF39	NM_025236;NM_170769	TSS1500;TSS1500	chr6:30042918-30043500	S_Shore			NA		6:30042516-30044199	Unclassified	TRUE	6	30076327	+	RNF39	ENSG00000204622.11	6	30005971	HLA-J	1	0.0228143	2.5765
cg04477431	-0.016205	0.00325213	-4.98289	6.26432e-07	-0.00991855	0.00290048	-3.41962	0.000627092	-0.0127036	0.00216464	-5.86871	4.39195e-09	0.353251	-0.0127036	0.00216464	2.69679e-07	37	6	31631716	6	31739695	R			NA	NA	BAT4	NM_033177	Body	chr6:31632815-31634093	N_Shore		RDMR	NA				NA	6	31663938	-	BAT4	ENSG00000204438.11	6	31661228	GPANK1	1	0.0250808	-0.918948
cg04477962	-0.0166091	0.00448086	-3.70668	0.000209996	-0.0252598	0.00396323	-6.37353	1.84725e-10	-0.0214627	0.00296864	-7.22981	4.83667e-13	0.351482	-0.0214627	0.00296864	6.34376e-11	37	12	51317375	12	49603642	F			NA	NA	METTL7A	NM_014033	TSS1500					NA				NA	12	50923591	+	METTL7A	ENSG00000185432.12	12	50923472	METTL7A	1	0.0223193	-0.782828
cg04491089	-0.0138105	0.00332819	-4.14955	3.33123e-05	-0.0137888	0.00328088	-4.20276	2.63682e-05	-0.0137995	0.00233648	-5.90609	3.50313e-09	0.999989	-0.0137995	0.00233648	2.18936e-07	37	16	84151300	16	82708801	F	rs79002563		NA	TRUE	MBTPS1	NM_003791	TSS1500	chr16:84149912-84151110	S_Shore			NA	16:82708736-82708812	16:84149634-84151436	Promoter_Associated	NA	16	84117694	+	MBTPS1	ENSG00000140943.17	16	84053761	MBTPS1	1	0.0210047	-0.568043
cg04491089	-0.0138105	0.00332819	-4.14955	3.33123e-05	-0.0137888	0.00328088	-4.20276	2.63682e-05	-0.0137995	0.00233648	-5.90609	3.50313e-09	0.999989	-0.0137995	0.00233648	2.18936e-07	37	16	84151300	16	82708801	F	rs79002563		NA	TRUE	MBTPS1	NM_003791	TSS1500	chr16:84149912-84151110	S_Shore			NA	16:82708736-82708812	16:84149634-84151436	Promoter_Associated	NA	16	84117694	+	MBTPS1	ENSG00000103160.12	16	84122141	HSDL1	1	0.0221953	-0.899952
cg04536704	-0.0196634	0.00288859	-6.80727	9.94695e-12	-0.019216	0.00290193	-6.62182	3.54805e-11	-0.0194407	0.00204724	-9.49608	2.1795e-21	0.99405	-0.0194407	0.00204724	1.16962e-18	37	6	32122966	6	32230944	R			NA	NA	PPT2;PPT2	NM_005155;NM_138717	Body;Body	chr6:32121829-32122529	S_Shore		RDMR	NA		6:32120376-32123743	Promoter_Associated	NA	6	32155188	-	PPT2	ENSG00000198502.6	6	32517353	HLA-DRB5	1	0.0344698	-7.08367
cg04545963	-0.00636267	0.00303442	-2.09683	0.0360083	-0.0173097	0.00280039	-6.18119	6.36196e-10	-0.0122746	0.00205794	-5.96449	2.45401e-09	0.0297669	-0.0122746	0.00205794	1.57843e-07	37	14	35872393	14	34942144	F			NA	NA	NFKBIA	NM_020529	Body	chr14:35873047-35873990	N_Shore		RDMR	NA				NA	14	35403186	+	NFKBIA	ENSG00000092020.10	14	35085467	PPP2R3C	1	0.018013	-1.27486
cg04550950	-0.0165853	0.00317378	-5.22573	1.73465e-07	-0.0372387	0.00393455	-9.46455	2.94818e-21	-0.0247267	0.00247028	-10.0097	1.38234e-23	0.000237238	-0.0247267	0.00247028	1.05251e-20	37	1	90299895	1	90072483	F			NA	NA	LRRC8D;LRRC8D	NM_018103;NM_001134479	5'UTR;5'UTR					TRUE				NA	1	89834335	+	LRRC8D	ENSG00000171492.14	1	89821014	LRRC8D	1	0.0151456	-0.736201
cg04550950	-0.0165853	0.00317378	-5.22573	1.73465e-07	-0.0372387	0.00393455	-9.46455	2.94818e-21	-0.0247267	0.00247028	-10.0097	1.38234e-23	0.000237238	-0.0247267	0.00247028	1.05251e-20	37	1	90299895	1	90072483	F			NA	NA	LRRC8D;LRRC8D	NM_018103;NM_001134479	5'UTR;5'UTR					TRUE				NA	1	89834335	+	LRRC8D	ENSG00000231613.1	1	89788914	AC099568.1	1	0.0404989	-1.38844
cg04552852	-0.00597042	0.00211549	-2.82223	0.00476903	-0.0142311	0.00236129	-6.02682	1.67214e-09	-0.00964857	0.00157564	-6.12359	9.14897e-10	0.0335533	-0.00964857	0.00157564	6.43474e-08	37	11	844390	11	834390	R			NA	NA	TSPAN4;TSPAN4;TSPAN4;TSPAN4;TSPAN4;TSPAN4;TSPAN4	NM_001025237;NM_001025236;NM_001025239;NM_001025238;NM_001025235;NM_003271;NM_001025234	TSS200;5'UTR;5'UTR;5'UTR;5'UTR;5'UTR;5'UTR	chr11:842293-843396	S_Shore			NA		11:844312-845097	Unclassified	NA	11	844389	-	TSPAN4	ENSG00000214063.11	11	842812	TSPAN4	1	0.050669	-3.72228
cg04552852	-0.00597042	0.00211549	-2.82223	0.00476903	-0.0142311	0.00236129	-6.02682	1.67214e-09	-0.00964857	0.00157564	-6.12359	9.14897e-10	0.0335533	-0.00964857	0.00157564	6.43474e-08	37	11	844390	11	834390	R			NA	NA	TSPAN4;TSPAN4;TSPAN4;TSPAN4;TSPAN4;TSPAN4;TSPAN4	NM_001025237;NM_001025236;NM_001025239;NM_001025238;NM_001025235;NM_003271;NM_001025234	TSS200;5'UTR;5'UTR;5'UTR;5'UTR;5'UTR;5'UTR	chr11:842293-843396	S_Shore			NA		11:844312-845097	Unclassified	NA	11	844389	-	TSPAN4	ENSG00000177697.19	11	832887	CD151	1	0.048167	6.29057
cg04559909	-0.0247187	0.00477651	-5.17504	2.27858e-07	-0.0259419	0.00547346	-4.73959	2.14155e-06	-0.0252475	0.00359885	-7.01544	2.29226e-12	0.985922	-0.0252475	0.00359885	2.6582e-10	37	4	74864725	4	75083589	R			NA	TRUE	CXCL5	NM_002994	TSS1500	chr4:74864113-74864329	S_Shore			TRUE				NA	4	73999007	-	CXCL5	ENSG00000163735.7	4	73995642	CXCL5	1	0.0545985	-3.05066
cg04588336	-0.0272235	0.00760126	-3.58145	0.000341692	-0.0313009	0.00777265	-4.02706	5.64793e-05	-0.0292168	0.00543448	-5.37618	7.60824e-08	0.932087	-0.0292168	0.00543448	3.61323e-06	37	11	75916460	11	75594108	F	rs608747	rs34321748	NA	NA	WNT11	NM_004626	Body	chr11:75917271-75917926	N_Shore			NA		11:75916366-75916467	Unclassified_Cell_type_specific	NA	11	76205415	+	WNT11	ENSG00000254933.1	11	76190725	AP000785.1	1	0.0245469	0.0921738
cg04588336	-0.0272235	0.00760126	-3.58145	0.000341692	-0.0313009	0.00777265	-4.02706	5.64793e-05	-0.0292168	0.00543448	-5.37618	7.60824e-08	0.932087	-0.0292168	0.00543448	3.61323e-06	37	11	75916460	11	75594108	F	rs608747	rs34321748	NA	NA	WNT11	NM_004626	Body	chr11:75917271-75917926	N_Shore			NA		11:75916366-75916467	Unclassified_Cell_type_specific	NA	11	76205415	+	WNT11	ENSG00000085741.13	11	76186325	WNT11	1	0.0140337	0.37767
cg04604946	-0.0106603	0.00266776	-3.99598	6.44268e-05	-0.0127456	0.00269204	-4.73455	2.19539e-06	-0.0116935	0.00189492	-6.17099	6.78635e-10	0.859533	-0.0116935	0.00189492	4.89596e-08	37	12	7023352	12	6893613	F			NA	NA	LRRC23;ENO2;LRRC23;LRRC23	NM_201650;NM_001975;NM_001135217;NM_006992	3'UTR;TSS1500;3'UTR;3'UTR	chr12:7023261-7024089	Island		CDMR	NA	12:6893563-6894581	12:7023192-7024412	Promoter_Associated	NA	12	6914187	+	LRRC23;ENO2	ENSG00000111674.9	12	6913745	ENO2	1	0.0163548	-1.04001
cg04609952	-0.0263625	0.00491983	-5.35841	8.39559e-08	-0.0331158	0.00435706	-7.60049	2.95001e-14	-0.0301473	0.00326181	-9.24252	2.40769e-20	0.589778	-0.0301473	0.00326181	1.10788e-17	37	2	16085893	2	16003344	F			NA	NA	MYCN	NM_005378	Body	chr2:16079801-16083032	S_Shelf			NA	2:16003179-16003527			NA	2	15945770	+	MYCN	ENSG00000134323.12	2	15940550	MYCN	1	0.0145027	-0.348879
cg04614290	-0.0295983	0.00446332	-6.63145	3.32412e-11	-0.0132107	0.00411652	-3.2092	0.00133107	-0.0207432	0.003026	-6.85497	7.13269e-12	0.0261947	-0.0207432	0.003026	7.51426e-10	37	19	2327696	19	2278696	F			NA	NA	LSM7;SPPL2B;SPPL2B	NM_016199;NM_152988;NM_001077238	Body;TSS1500;TSS1500	chr19:2328364-2329089	N_Shore			NA		19:2327637-2328112	Promoter_Associated	TRUE	19	2327696	+	LSM7;SPPL2B	ENSG00000130332.15	19	2321520	LSM7	1	0.0437967	-0.972093
cg04617428	-0.00857365	0.00272563	-3.14556	0.00165769	-0.012902	0.00244998	-5.26615	1.39312e-07	-0.0109677	0.00182208	-6.01931	1.75161e-09	0.497876	-0.0109677	0.00182208	1.1598e-07	37	10	104223518	10	104213508	F			NA	NA	TMEM180	NM_024789	5'UTR	chr10:104220983-104221287	S_Shelf			NA				NA	10	102463760	+	TMEM180	ENSG00000138111.14	10	102461395	MFSD13A	1	0.0232496	1.90547
cg04636834	-0.0165943	0.00335443	-4.94698	7.53736e-07	-0.0106441	0.0040788	-2.6096	0.00906471	-0.0141936	0.00259081	-5.47842	4.29131e-08	0.530064	-0.0141936	0.00259081	2.14622e-06	37	16	685580	16	625581	R			NA	NA	C16orf13;C16orf13;C16orf13;C16orf13;C16orf13	NM_001040160;NM_001040161;NM_032366;NM_001040165;NM_001040162	Body;Body;Body;Body;Body	chr16:682634-687106	Island			NA				NA	16	635579	-	C16orf13	ENSG00000130731.16	16	634427	METTL26	1	0.0204973	-0.818828
cg04660111	-0.0104227	0.0031348	-3.32482	0.000884749	-0.0181171	0.00349626	-5.18185	2.19691e-07	-0.0138517	0.00233401	-5.93474	2.94312e-09	0.261203	-0.0138517	0.00233401	1.86183e-07	37	19	49199234	19	53891046	R			NA	NA	FUT2;FUT2;FUT2;FUT2	NM_000511;NM_001097638;NM_000511;NM_001097638	1stExon;1stExon;5'UTR;5'UTR	chr19:49199964-49200184	N_Shore			NA				TRUE	19	48695976	-	FUT2	ENSG00000142233.11	19	48661407	NTN5	1	0.0248028	1.4815
cg04665046	-0.00534238	0.00194861	-2.74163	0.00611343	-0.0102667	0.00198151	-5.18124	2.20413e-07	-0.00776331	0.00138936	-5.58769	2.30116e-08	0.208087	-0.00776331	0.00138936	1.21818e-06	37	9	123691674	9	122731495	F			NA	NA				chr9:123690771-123691675	Island			NA	9:122730479-122731496			NA	9	120929395	+		ENSG00000226752.9	9	120824828	CUTALP	1	0.0571401	-14.108
cg04665046	-0.00534238	0.00194861	-2.74163	0.00611343	-0.0102667	0.00198151	-5.18124	2.20413e-07	-0.00776331	0.00138936	-5.58769	2.30116e-08	0.208087	-0.00776331	0.00138936	1.21818e-06	37	9	123691674	9	122731495	F			NA	NA				chr9:123690771-123691675	Island			NA	9:122730479-122731496			NA	9	120929395	+		ENSG00000119403.15	9	120855651	PHF19	1	0.0138404	1.07742
cg04666465	-0.016576	0.00403748	-4.10552	4.03403e-05	-0.0219256	0.00389003	-5.63636	1.73684e-08	-0.0193503	0.00280135	-6.90749	4.93307e-12	0.634308	-0.0193503	0.00280135	5.36576e-10	37	16	23520563	16	23428064	R			NA	NA	GGA2	NM_015044	Body	chr16:23521573-23521899	N_Shore			NA	16:23427968-23428251			NA	16	23509241	-	GGA2	ENSG00000166847.10	16	23641466	DCTN5	1	0.105753	-2.04781
cg04666465	-0.016576	0.00403748	-4.10552	4.03403e-05	-0.0219256	0.00389003	-5.63636	1.73684e-08	-0.0193503	0.00280135	-6.90749	4.93307e-12	0.634308	-0.0193503	0.00280135	5.36576e-10	37	16	23520563	16	23428064	R			NA	NA	GGA2	NM_015044	Body	chr16:23521573-23521899	N_Shore			NA	16:23427968-23428251			NA	16	23509241	-	GGA2	ENSG00000260482.3	16	23670011	AC008870.1	1	0.0274527	-1.26521
cg04666465	-0.016576	0.00403748	-4.10552	4.03403e-05	-0.0219256	0.00389003	-5.63636	1.73684e-08	-0.0193503	0.00280135	-6.90749	4.93307e-12	0.634308	-0.0193503	0.00280135	5.36576e-10	37	16	23520563	16	23428064	R			NA	NA	GGA2	NM_015044	Body	chr16:23521573-23521899	N_Shore			NA	16:23427968-23428251			NA	16	23509241	-	GGA2	ENSG00000103356.15	16	23522014	EARS2	1	0.0244468	0.730681
cg04678936	-0.0107149	0.00257084	-4.16785	3.07489e-05	-0.0107514	0.00219286	-4.90291	9.44276e-07	-0.010736	0.00166838	-6.43501	1.23465e-10	0.999941	-0.010736	0.00166838	1.02657e-08	37	15	43802612	15	41589904	R			NA	NA	TP53BP1;TP53BP1	NM_005657;NM_005657	1stExon;5'UTR	chr15:43802881-43803407	N_Shore			NA		15:43801332-43804151	Promoter_Associated	NA	15	43510413	-	TP53BP1	ENSG00000166763.7	15	43699488	STRCP1	1	0.0206193	1.50443
cg04678936	-0.0107149	0.00257084	-4.16785	3.07489e-05	-0.0107514	0.00219286	-4.90291	9.44276e-07	-0.010736	0.00166838	-6.43501	1.23465e-10	0.999941	-0.010736	0.00166838	1.02657e-08	37	15	43802612	15	41589904	R			NA	NA	TP53BP1;TP53BP1	NM_005657;NM_005657	1stExon;5'UTR	chr15:43802881-43803407	N_Shore			NA		15:43801332-43804151	Promoter_Associated	NA	15	43510413	-	TP53BP1	ENSG00000140265.12	15	43358172	ZSCAN29	1	0.0147948	-0.933883
cg04738224	-0.014561	0.00298468	-4.87856	1.06861e-06	-0.0133451	0.00396567	-3.36517	0.00076497	-0.0141213	0.00238473	-5.92155	3.18923e-09	0.970443	-0.0141213	0.00238473	2.00755e-07	37	19	15618961	19	15479961	R			NA	NA	CYP4F22	NM_173483	TSS1500	chr19:15619223-15619613	N_Shore			NA		19:15618869-15619738	Unclassified_Cell_type_specific	NA	19	15508149	-	CYP4F22	ENSG00000171954.13	19	15508525	CYP4F22	1	0.0135643	-1.52262
cg04742397	-0.0112256	0.00282413	-3.97489	7.04124e-05	-0.0173896	0.00311322	-5.58572	2.32739e-08	-0.0140082	0.00209172	-6.69697	2.12781e-11	0.341211	-0.0140082	0.00209172	2.04543e-09	37	14	95986554	14	95056307	F	rs61983379	rs76883386	NA	NA				chr14:95982498-95983533	S_Shelf			NA		14:95985857-95986582	Unclassified_Cell_type_specific	NA	14	95520216	+		ENSG00000176438.12	14	95407266	SYNE3	1	0.0223457	-1.4023
cg04751761	-0.00979513	0.00309498	-3.16484	0.00155167	-0.0239194	0.00280781	-8.5189	1.61074e-17	-0.0175428	0.00207955	-8.43586	3.28766e-17	0.00330586	-0.0175428	0.00207955	8.83222e-15	37	16	2084192	16	2024193	R			NA	NA	SLC9A3R2;SLC9A3R2	NM_001130012;NM_004785	Body;Body	chr16:2086420-2086892	N_Shelf		CDMR	TRUE				TRUE	16	2034190	-	SLC9A3R2	ENSG00000065054.14	16	2025356	SLC9A3R2	1	0.0378477	-2.18409
cg04755674	-0.0142702	0.00361522	-3.94726	7.90506e-05	-0.0353411	0.0041471	-8.52188	1.56987e-17	-0.0233686	0.00272512	-8.57526	9.88644e-18	0.000652889	-0.0233686	0.00272512	2.90666e-15	37	19	14142047	19	14003047	F	rs75361438		NA	NA	IL27RA	NM_004843	TSS1500	chr19:14142398-14142977	N_Shore			NA		19:14141765-14143437	Promoter_Associated	NA	19	14031234	+	IL27RA	ENSG00000104998.4	19	14031762	IL27RA	1	0.034513	0.690792
cg04770751	-0.0129741	0.00409742	-3.16641	0.00154336	-0.0231131	0.00471091	-4.9063	9.28119e-07	-0.0173408	0.00309162	-5.60899	2.03515e-08	0.267516	-0.0173408	0.00309162	1.08914e-06	37	19	7701662	19	7607662	R			NA	NA	STXBP2;STXBP2	NM_001127396;NM_006949	TSS1500;TSS1500	chr19:7701661-7702336	Island			NA	19:7607318-7608653	19:7701477-7702737	Promoter_Associated	TRUE	19	7636775	-	STXBP2	ENSG00000174788.10	19	7631611	PCP2	1	0.0350467	-1.13428
cg04770751	-0.0129741	0.00409742	-3.16641	0.00154336	-0.0231131	0.00471091	-4.9063	9.28119e-07	-0.0173408	0.00309162	-5.60899	2.03515e-08	0.267516	-0.0173408	0.00309162	1.08914e-06	37	19	7701662	19	7607662	R			NA	NA	STXBP2;STXBP2	NM_001127396;NM_006949	TSS1500;TSS1500	chr19:7701661-7702336	Island			NA	19:7607318-7608653	19:7701477-7702737	Promoter_Associated	TRUE	19	7636775	-	STXBP2	ENSG00000268204.1	19	7633766	AC008763.1	1	0.0346026	-1.08626
cg04782146	0.0123191	0.0025126	4.90291	9.4425e-07	0.00815009	0.00328591	2.48032	0.0131266	0.0107809	0.00199595	5.40137	6.61353e-08	0.601762	0.0107809	0.00199595	3.1818e-06	37	16	85112370	16	83669871	R			NA	NA	KIAA0513	NM_014732	Body					NA	16:83669871-83670152			NA	16	85078763	-	KIAA0513	ENSG00000153786.12	16	84974181	ZDHHC7	1	0.0173655	0.763142
cg04793632	-0.0117584	0.00302428	-3.88799	0.000101079	-0.0183619	0.00324458	-5.65927	1.52019e-08	-0.0148284	0.00221227	-6.70278	2.04491e-11	0.330133	-0.0148284	0.00221227	1.97237e-09	37	7	102036050	7	101823055	F			NA	NA	PRKRIP1	NM_024653	TSS1500	chr7:102036470-102037017	N_Shore			NA		7:102036041-102037243	Promoter_Associated	NA	7	102395602	+	PRKRIP1	ENSG00000160991.16	7	102433106	ORAI2	1	0.0617867	2.46137
cg04793632	-0.0117584	0.00302428	-3.88799	0.000101079	-0.0183619	0.00324458	-5.65927	1.52019e-08	-0.0148284	0.00221227	-6.70278	2.04491e-11	0.330133	-0.0148284	0.00221227	1.97237e-09	37	7	102036050	7	101823055	F			NA	NA	PRKRIP1	NM_024653	TSS1500	chr7:102036470-102037017	N_Shore			NA		7:102036041-102037243	Promoter_Associated	NA	7	102395602	+	PRKRIP1	ENSG00000239969.5	7	102364162	AC091390.4	1	0.0144386	0.978127
cg04794268	-0.0177076	0.00323614	-5.47182	4.45441e-08	-0.0105907	0.00543187	-1.94974	0.051207	-0.0158433	0.00278015	-5.69872	1.20714e-08	0.530748	-0.0158433	0.00278015	6.77521e-07	37	8	145690383	8	145661191	F	rs2620645		NA	TRUE	KIFC2;CYHR1;CYHR1;CYHR1;CYHR1	NM_145754;NM_138496;NM_138496;NM_001129888;NM_032687	TSS1500;5'UTR;1stExon;5'UTR;5'UTR	chr8:145690605-145692505	N_Shore			NA	8:145661071-145663313	8:145688876-145690425	Promoter_Associated	NA	8	144464999	+	KIFC2;CYHR1	ENSG00000160959.8	8	144517992	LRRC14	1	0.0267134	1.00445
cg04794268	-0.0177076	0.00323614	-5.47182	4.45441e-08	-0.0105907	0.00543187	-1.94974	0.051207	-0.0158433	0.00278015	-5.69872	1.20714e-08	0.530748	-0.0158433	0.00278015	6.77521e-07	37	8	145690383	8	145661191	F	rs2620645		NA	TRUE	KIFC2;CYHR1;CYHR1;CYHR1;CYHR1	NM_145754;NM_138496;NM_138496;NM_001129888;NM_032687	TSS1500;5'UTR;1stExon;5'UTR;5'UTR	chr8:145690605-145692505	N_Shore			NA	8:145661071-145663313	8:145688876-145690425	Promoter_Associated	NA	8	144464999	+	KIFC2;CYHR1	ENSG00000160972.9	8	144477969	PPP1R16A	1	0.0522543	2.26627
cg04799958	-0.0192092	0.004358	-4.4078	1.04428e-05	-0.0212154	0.00478646	-4.43237	9.32021e-06	-0.0201185	0.00322242	-6.24328	4.28491e-10	0.95311	-0.0201185	0.00322242	3.21525e-08	37	12	53343849	12	51630116	F			NA	NA	KRT18;KRT18	NM_000224;NM_199187	Body;Body	chr12:53342805-53343162	S_Shore			NA				TRUE	12	52950064	+	KRT18	ENSG00000170421.12	12	52897187	KRT8	1	0.0787847	-1.36715
cg04799958	-0.0192092	0.004358	-4.4078	1.04428e-05	-0.0212154	0.00478646	-4.43237	9.32021e-06	-0.0201185	0.00322242	-6.24328	4.28491e-10	0.95311	-0.0201185	0.00322242	3.21525e-08	37	12	53343849	12	51630116	F			NA	NA	KRT18;KRT18	NM_000224;NM_199187	Body;Body	chr12:53342805-53343162	S_Shore			NA				TRUE	12	52950064	+	KRT18	ENSG00000111057.11	12	52948871	KRT18	1	0.0741218	-1.71971
cg04821375	-0.0189586	0.0042277	-4.48439	7.31228e-06	-0.0179488	0.00566471	-3.16853	0.00153212	-0.0185974	0.00338813	-5.48898	4.04258e-08	0.989846	-0.0185974	0.00338813	2.03232e-06	37	17	7227662	17	7168386	R			NA	NA	NEURL4;NEURL4	NM_032442;NM_001005408	Body;Body	chr17:7227416-7227698	Island			NA	17:7168141-7168422	17:7227541-7227926	Gene_Associated	TRUE	17	7324342	-	NEURL4	ENSG00000072818.12	17	7336529	ACAP1	1	0.013729	-0.464967
cg04821375	-0.0189586	0.0042277	-4.48439	7.31228e-06	-0.0179488	0.00566471	-3.16853	0.00153212	-0.0185974	0.00338813	-5.48898	4.04258e-08	0.989846	-0.0185974	0.00338813	2.03232e-06	37	17	7227662	17	7168386	R			NA	NA	NEURL4;NEURL4	NM_032442;NM_001005408	Body;Body	chr17:7227416-7227698	Island			NA	17:7168141-7168422	17:7227541-7227926	Gene_Associated	TRUE	17	7324342	-	NEURL4	ENSG00000213859.6	17	7351889	KCTD11	1	0.0159628	0.482189
cg04829830	-0.0302994	0.00683531	-4.43277	9.303e-06	-0.0345773	0.00577632	-5.98605	2.15002e-09	-0.032795	0.00441192	-7.43328	1.05935e-13	0.892031	-0.032795	0.00441192	1.57705e-11	37	14	105339549	14	104410594	R			NA	NA	KIAA0284;KIAA0284	NM_015005;NM_001112726	5'UTR;Body					TRUE		14:105339507-105339579	Unclassified_Cell_type_specific	TRUE	14	104873211	-	KIAA0284	ENSG00000258701.1	14	104821201	LINC00638	1	0.0186556	-0.509838
cg04829830	-0.0302994	0.00683531	-4.43277	9.303e-06	-0.0345773	0.00577632	-5.98605	2.15002e-09	-0.032795	0.00441192	-7.43328	1.05935e-13	0.892031	-0.032795	0.00441192	1.57705e-11	37	14	105339549	14	104410594	R			NA	NA	KIAA0284;KIAA0284	NM_015005;NM_001112726	5'UTR;Body					TRUE		14:105339507-105339579	Unclassified_Cell_type_specific	TRUE	14	104873211	-	KIAA0284	ENSG00000258593.2	14	104857792	AL583810.1	1	0.0151476	0.0543155
cg04829830	-0.0302994	0.00683531	-4.43277	9.303e-06	-0.0345773	0.00577632	-5.98605	2.15002e-09	-0.032795	0.00441192	-7.43328	1.05935e-13	0.892031	-0.032795	0.00441192	1.57705e-11	37	14	105339549	14	104410594	R			NA	NA	KIAA0284;KIAA0284	NM_015005;NM_001112726	5'UTR;Body					TRUE		14:105339507-105339579	Unclassified_Cell_type_specific	TRUE	14	104873211	-	KIAA0284	ENSG00000099814.16	14	104865268	CEP170B	1	0.0811925	1.64218
cg04831783	-0.0124578	0.00233671	-5.33133	9.7498e-08	-0.0126981	0.00520279	-2.44062	0.0146619	-0.0124981	0.00213159	-5.86327	4.53844e-09	0.999113	-0.0124981	0.00213159	2.77794e-07	37	16	88769549	16	87297050	F	rs45507504	rs2340972	NA	NA	RNF166	NM_178841	Body	chr16:88772237-88773195	N_Shelf			NA	16:87296885-87297103			NA	16	88703140	+	RNF166	ENSG00000278341.1	16	88708956	AC138028.6	1	0.0135329	-1.55705
cg04834097	-0.0205613	0.00305421	-6.73213	1.67196e-11	-0.0208924	0.00250567	-8.33807	7.5512e-17	-0.0207592	0.00193717	-10.7162	8.53968e-27	0.996494	-0.0207592	0.00193717	1.13544e-23	37	7	63774078	7	63411513	R			NA	NA	LOC728927	NM_001170905	5'UTR					NA		7:63774065-63774850	Promoter_Associated	TRUE	7	64313699	-	LOC728927	ENSG00000234444.10	7	64307459	ZNF736	1	0.0440344	-2.28485
cg04834097	-0.0205613	0.00305421	-6.73213	1.67196e-11	-0.0208924	0.00250567	-8.33807	7.5512e-17	-0.0207592	0.00193717	-10.7162	8.53968e-27	0.996494	-0.0207592	0.00193717	1.13544e-23	37	7	63774078	7	63411513	R			NA	NA	LOC728927	NM_001170905	5'UTR					NA		7:63774065-63774850	Promoter_Associated	TRUE	7	64313699	-	LOC728927	ENSG00000227986.1	7	64355078	TRIM60P18	1	0.0181513	-1.49492
cg04856022	-0.0207523	0.00281628	-7.36869	1.72309e-13	-0.019734	0.00282804	-6.97799	2.99437e-12	-0.0202453	0.00199556	-10.1452	3.48105e-24	0.967975	-0.0202453	0.00199556	2.86603e-21	37	6	32122955	6	32230933	R			NA	NA	PPT2;PPT2	NM_005155;NM_138717	Body;Body	chr6:32121829-32122529	S_Shore		RDMR	NA		6:32120376-32123743	Promoter_Associated	NA	6	32155177	-	PPT2	ENSG00000198502.6	6	32517353	HLA-DRB5	1	0.0356379	-8.65918
cg04856022	-0.0207523	0.00281628	-7.36869	1.72309e-13	-0.019734	0.00282804	-6.97799	2.99437e-12	-0.0202453	0.00199556	-10.1452	3.48105e-24	0.967975	-0.0202453	0.00199556	2.86603e-21	37	6	32122955	6	32230933	R			NA	NA	PPT2;PPT2	NM_005155;NM_138717	Body;Body	chr6:32121829-32122529	S_Shore		RDMR	NA		6:32120376-32123743	Promoter_Associated	NA	6	32155177	-	PPT2	ENSG00000244731.8	6	31982057	C4A	1	0.0148498	-1.7202
cg04856117	-0.0119255	0.00367662	-3.2436	0.0011803	-0.022711	0.00382325	-5.94024	2.84601e-09	-0.0171075	0.00265008	-6.45544	1.07904e-10	0.126522	-0.0171075	0.00265008	9.07861e-09	37	22	19949901	22	18329901	F			NA	NA	COMT;COMT;COMT;COMT	NM_001135162;NM_001135161;NM_000754;NM_007310	5'UTR;5'UTR;5'UTR;TSS200					NA		22:19948930-19950375	Gene_Associated	NA	22	19962377	+	COMT	ENSG00000099889.14	22	19969896	ARVCF	1	0.0146202	1.83397
cg04880052	-0.0108443	0.00252382	-4.29678	1.73294e-05	-0.00947897	0.00226283	-4.18898	2.80208e-05	-0.0100874	0.0016848	-5.98729	2.13362e-09	0.922082	-0.0100874	0.0016848	1.38879e-07	37	2	219191631	2	218899875	F			NA	NA	PNKD;PNKD	NM_015488;NM_022572	Body;Body	chr2:219187653-219188251	S_Shelf			TRUE				NA	2	218326907	+	PNKD	ENSG00000261338.2	2	218255319	AC021016.2	1	0.0490581	4.30126
cg04896678	-0.00778014	0.00262976	-2.95849	0.00309147	-0.0170859	0.00333969	-5.11601	3.12065e-07	-0.0113417	0.00206611	-5.48942	4.03254e-08	0.0910584	-0.0113417	0.00206611	2.02773e-06	37	6	15662223	6	15770202	R			NA	NA	DTNBP1;DTNBP1;DTNBP1	NM_183040;NM_032122;NM_183041	Body;Body;5'UTR	chr6:15662444-15663412	N_Shore			NA	6:15770160-15771376	6:15662124-15663899	Promoter_Associated	NA	6	15661991	-	DTNBP1	ENSG00000047579.19	6	15522801	DTNBP1	1	0.0189056	-0.895204
cg04913265	-0.0294249	0.00805801	-3.65164	0.000260575	-0.0428055	0.0105583	-4.05422	5.03012e-05	-0.03435	0.00640561	-5.36248	8.20849e-08	0.602022	-0.03435	0.00640561	3.87064e-06	37	11	133939627	11	133444837	R			NA	NA	JAM3	NM_032801	Body	chr11:133938850-133939681	Island			NA	11:133444061-133444891			TRUE	11	134069731	-	JAM3	ENSG00000166086.12	11	134068925	JAM3	1	0.0224713	-0.739063
cg04913265	-0.0294249	0.00805801	-3.65164	0.000260575	-0.0428055	0.0105583	-4.05422	5.03012e-05	-0.03435	0.00640561	-5.36248	8.20849e-08	0.602022	-0.03435	0.00640561	3.87064e-06	37	11	133939627	11	133444837	R			NA	NA	JAM3	NM_032801	Body	chr11:133938850-133939681	Island			NA	11:133444061-133444891			TRUE	11	134069731	-	JAM3	ENSG00000151503.12	11	134150119	NCAPD3	1	0.0168443	0.300665
cg04915300	0.0136149	0.00294827	4.61793	3.87595e-06	0.00948696	0.00276924	3.42584	0.000612912	0.0114218	0.00201847	5.65863	1.52585e-08	0.594079	0.0114218	0.00201847	8.39895e-07	37	2	157314925	2	157023171	F			NA	NA	GPD2;GPD2	NM_000408;NM_001083112	5'UTR;5'UTR					TRUE				NA	2	156458412	+	GPD2	ENSG00000115159.16	2	156435290	GPD2	1	0.107709	-2.73634
cg04945945	-0.0113062	0.00266582	-4.24119	2.22341e-05	-0.0143526	0.00310919	-4.61617	3.90878e-06	-0.0125969	0.00202378	-6.22443	4.83324e-10	0.758334	-0.0125969	0.00202378	3.59022e-08	37	17	76129402	17	73640997	F			NA	NA	TMC8;TMC6	NM_152468;NM_007267	Body;TSS1500	chr17:76127521-76128406	S_Shore			NA	17:73640997-73641142			NA	17	78133320	+	TMC8;TMC6	ENSG00000187997.11	17	78146353	C17orf99	1	0.0156529	1.5476
cg04955914	-0.0192774	0.00334655	-5.76037	8.39284e-09	-0.00943787	0.00276683	-3.41108	0.000647053	-0.0134329	0.0021324	-6.29941	2.98782e-10	0.0767337	-0.0134329	0.0021324	2.3167e-08	37	2	220040571	2	219748815	R			NA	NA	C2orf24	NM_015680	Body	chr2:220041129-220043410	N_Shore			NA				NA	2	219175848	-	C2orf24	ENSG00000144567.11	2	219176225	RETREG2	1	0.0149289	-0.668934
cg04959790	-0.0161602	0.00329708	-4.90137	9.51723e-07	-0.0127628	0.00312041	-4.09011	4.31167e-05	-0.0143681	0.00226635	-6.33974	2.30153e-10	0.755747	-0.0143681	0.00226635	1.82507e-08	37	11	47278977	11	47235553	F			NA	NA	NR1H3;NR1H3;NR1H3	NM_001130102;NM_005693;NM_001130101	5'UTR;TSS1500;TSS1500					TRUE				TRUE	11	47257425	+	NR1H3	ENSG00000025434.19	11	47248300	NR1H3	1	0.0760968	-2.65655
cg04959790	-0.0161602	0.00329708	-4.90137	9.51723e-07	-0.0127628	0.00312041	-4.09011	4.31167e-05	-0.0143681	0.00226635	-6.33974	2.30153e-10	0.755747	-0.0143681	0.00226635	1.82507e-08	37	11	47278977	11	47235553	F			NA	NA	NR1H3;NR1H3;NR1H3	NM_001130102;NM_005693;NM_001130101	5'UTR;TSS1500;TSS1500					TRUE				TRUE	11	47257425	+	NR1H3	ENSG00000134575.10	11	47239302	ACP2	1	0.0295353	-1.36359
cg04959790	-0.0161602	0.00329708	-4.90137	9.51723e-07	-0.0127628	0.00312041	-4.09011	4.31167e-05	-0.0143681	0.00226635	-6.33974	2.30153e-10	0.755747	-0.0143681	0.00226635	1.82507e-08	37	11	47278977	11	47235553	F			NA	NA	NR1H3;NR1H3;NR1H3	NM_001130102;NM_005693;NM_001130101	5'UTR;TSS1500;TSS1500					TRUE				TRUE	11	47257425	+	NR1H3	ENSG00000172247.4	11	47589667	C1QTNF4	1	0.0146381	0.852826
cg04970434	-0.0230465	0.00328709	-7.01122	2.36246e-12	-0.0170581	0.00330564	-5.1603	2.46549e-07	-0.0200692	0.00233086	-8.61022	7.29226e-18	0.438204	-0.0200692	0.00233086	2.20211e-15	37	17	4838096	17	4778838	F			NA	NA	GP1BA	NM_000173	3'UTR					NA				TRUE	17	4934800	+	GP1BA	ENSG00000108556.9	17	4897771	CHRNE	1	0.0143653	-1.52154
cg04976697	-0.0066965	0.00244584	-2.73791	0.00618313	-0.012485	0.0022761	-5.48525	4.12889e-08	-0.00979855	0.00166623	-5.88069	4.08568e-09	0.22295	-0.00979855	0.00166623	2.52755e-07	37	22	30938784	22	29268784	R			NA	NA				chr22:30938016-30938645	S_Shore			NA	22:29268031-29269277			TRUE	22	30542796	-		ENSG00000225774.2	22	30542536	SIRPAP1	1	0.0271425	-5.66972
cg04986324	-0.0305049	0.00460677	-6.62174	3.54989e-11	-0.0380527	0.00531312	-7.16202	7.94987e-13	-0.033744	0.00348062	-9.69484	3.17133e-22	0.562136	-0.033744	0.00348062	1.92973e-19	37	22	46451319	22	44829983	R			NA	NA	LOC150381;C22orf26	NR_027034;NM_018280	Body;TSS1500	chr22:46449632-46450115	S_Shore			NA		22:46451133-46451326	Unclassified_Cell_type_specific	NA	22	46055438	-	LOC150381;C22orf26	ENSG00000197182.14	22	46053869	MIRLET7BHG	1	0.0163432	-0.853037
cg04987734	0.0315644	0.00362722	8.70209	3.25838e-18	0.0174938	0.00402294	4.34851	1.37068e-05	0.025255	0.0026939	9.37487	6.92624e-21	0.0342581	0.025255	0.0026939	3.48202e-18	37	14	103415873	14	102485626	R			NA	NA	CDC42BPB	NM_006035	Body					TRUE	14:102485602-102485692	14:103415151-103416162	Unclassified	NA	14	102949535	-	CDC42BPB	ENSG00000198752.11	14	102932380	CDC42BPB	1	0.0342757	1.56367
cg04993130	-0.0212107	0.00417845	-5.07623	3.85007e-07	-0.0258189	0.00421151	-6.13056	8.75701e-10	-0.0234967	0.00296623	-7.92139	2.34861e-15	0.739583	-0.0234967	0.00296623	4.62881e-13	37	11	726759	11	716759	R		rs71764541	NA	NA	EPS8L2	NM_022772	Body	chr11:725596-726870	Island			TRUE	11:715616-716796	11:725543-727043	Unclassified	NA	11	726758	-	EPS8L2	ENSG00000279672.1	11	779617	AP006621.5	1	0.0648884	-2.80305
cg04993130	-0.0212107	0.00417845	-5.07623	3.85007e-07	-0.0258189	0.00421151	-6.13056	8.75701e-10	-0.0234967	0.00296623	-7.92139	2.34861e-15	0.739583	-0.0234967	0.00296623	4.62881e-13	37	11	726759	11	716759	R		rs71764541	NA	NA	EPS8L2	NM_022772	Body	chr11:725596-726870	Island			TRUE	11:715616-716796	11:725543-727043	Unclassified	NA	11	726758	-	EPS8L2	ENSG00000177106.16	11	694438	EPS8L2	1	0.0594007	-1.90373
cg04993130	-0.0212107	0.00417845	-5.07623	3.85007e-07	-0.0258189	0.00421151	-6.13056	8.75701e-10	-0.0234967	0.00296623	-7.92139	2.34861e-15	0.739583	-0.0234967	0.00296623	4.62881e-13	37	11	726759	11	716759	R		rs71764541	NA	NA	EPS8L2	NM_022772	Body	chr11:725596-726870	Island			TRUE	11:715616-716796	11:725543-727043	Unclassified	NA	11	726758	-	EPS8L2	ENSG00000177595.18	11	799179	PIDD1	1	0.0151409	-0.850713
cg04993130	-0.0212107	0.00417845	-5.07623	3.85007e-07	-0.0258189	0.00421151	-6.13056	8.75701e-10	-0.0234967	0.00296623	-7.92139	2.34861e-15	0.739583	-0.0234967	0.00296623	4.62881e-13	37	11	726759	11	716759	R		rs71764541	NA	NA	EPS8L2	NM_022772	Body	chr11:725596-726870	Island			TRUE	11:715616-716796	11:725543-727043	Unclassified	NA	11	726758	-	EPS8L2	ENSG00000255284.1	11	777578	AP006621.3	1	0.0617649	-2.28252
cg04993130	-0.0212107	0.00417845	-5.07623	3.85007e-07	-0.0258189	0.00421151	-6.13056	8.75701e-10	-0.0234967	0.00296623	-7.92139	2.34861e-15	0.739583	-0.0234967	0.00296623	4.62881e-13	37	11	726759	11	716759	R		rs71764541	NA	NA	EPS8L2	NM_022772	Body	chr11:725596-726870	Island			TRUE	11:715616-716796	11:725543-727043	Unclassified	NA	11	726758	-	EPS8L2	ENSG00000255142.1	11	781645	AP006621.2	1	0.0147709	-0.552628
cg04993130	-0.0212107	0.00417845	-5.07623	3.85007e-07	-0.0258189	0.00421151	-6.13056	8.75701e-10	-0.0234967	0.00296623	-7.92139	2.34861e-15	0.739583	-0.0234967	0.00296623	4.62881e-13	37	11	726759	11	716759	R		rs71764541	NA	NA	EPS8L2	NM_022772	Body	chr11:725596-726870	Island			TRUE	11:715616-716796	11:725543-727043	Unclassified	NA	11	726758	-	EPS8L2	ENSG00000177685.17	11	826144	CRACR2B	1	0.0156152	-1.73045
cg04995717	-0.0145012	0.00439594	-3.29878	0.000971075	-0.0354303	0.005071	-6.98685	2.81126e-12	-0.0234809	0.00332161	-7.06913	1.55913e-12	0.00772937	-0.0234809	0.00332161	1.86533e-10	37	9	27109293	9	27099293	F	rs72535318		NA	TRUE	TEK;TEK	NM_000459;NM_000459	5'UTR;1stExon					NA				NA	9	27109294	+	TEK	ENSG00000120156.21	9	27109141	TEK	1	0.0155823	-1.22397
cg04999824	-0.0122049	0.0023132	-5.27619	1.31899e-07	-0.0112872	0.00215856	-5.22903	1.70405e-07	-0.0117143	0.00157817	-7.42272	1.14741e-13	0.958808	-0.0117143	0.00157817	1.69511e-11	37	17	76967757	17	74479352	F	rs61729727		NA	NA	LGALS3BP	NM_005567	Body					NA	17:74479247-74479457	17:76967030-76967858	Unclassified	NA	17	78971674	+	LGALS3BP	ENSG00000108679.13	17	78971238	LGALS3BP	1	0.0590872	5.37781
cg05068202	-0.0137467	0.00473397	-2.90383	0.00368625	-0.0211085	0.00441705	-4.77887	1.76282e-06	-0.0176822	0.00322956	-5.47513	4.372e-08	0.523917	-0.0176822	0.00322956	2.18168e-06	37	11	2293074	11	2249650	F			NA	NA	ASCL2	NM_005170	TSS1500	chr11:2290104-2292932	S_Shore			NA	11:2246715-2249758			NA	11	2271843	+	ASCL2	ENSG00000064201.15	11	2301997	TSPAN32	1	0.0138772	0.658723
cg05068202	-0.0137467	0.00473397	-2.90383	0.00368625	-0.0211085	0.00441705	-4.77887	1.76282e-06	-0.0176822	0.00322956	-5.47513	4.372e-08	0.523917	-0.0176822	0.00322956	2.18168e-06	37	11	2293074	11	2249650	F			NA	NA	ASCL2	NM_005170	TSS1500	chr11:2290104-2292932	S_Shore			NA	11:2246715-2249758			NA	11	2271843	+	ASCL2	ENSG00000183734.4	11	2268495	ASCL2	1	0.0207383	1.21167
cg05083128	-0.0253008	0.00403046	-6.27739	3.44299e-10	-0.0199542	0.00345303	-5.77875	7.52567e-09	-0.0222174	0.00262227	-8.47259	2.39995e-17	0.602047	-0.0222174	0.00262227	6.61498e-15	37	4	10077759	4	9686857	F			NA	NA	WDR1;WDR1	NM_005112;NM_017491	Body;Body	chr4:10079335-10079555	N_Shore			TRUE				NA	4	10076134	+	WDR1	ENSG00000109667.12	4	9771153	SLC2A9	1	0.0142294	1.04132
cg05085585	-0.012303	0.00341632	-3.60125	0.000316696	-0.0232708	0.00371789	-6.25913	3.87122e-10	-0.0173241	0.00251557	-6.88675	5.70827e-12	0.0944939	-0.0173241	0.00251557	6.12962e-10	37	16	30420623	16	30328124	R			NA	NA	ZNF771;ZNF771	NM_001142305;NM_016643	Body;Body	chr16:30418557-30419272	S_Shore			TRUE		16:30420595-30421418	Unclassified	NA	16	30409301	-	ZNF771	ENSG00000183604.14	16	30267553	SMG1P5	1	0.0179123	-1.24808
cg05085585	-0.012303	0.00341632	-3.60125	0.000316696	-0.0232708	0.00371789	-6.25913	3.87122e-10	-0.0173241	0.00251557	-6.88675	5.70827e-12	0.0944939	-0.0173241	0.00251557	6.12962e-10	37	16	30420623	16	30328124	R			NA	NA	ZNF771;ZNF771	NM_001142305;NM_016643	Body;Body	chr16:30418557-30419272	S_Shore			TRUE		16:30420595-30421418	Unclassified	NA	16	30409301	-	ZNF771	ENSG00000273724.1	16	30336400	AC106782.5	1	0.0200414	-0.491411
cg05085585	-0.012303	0.00341632	-3.60125	0.000316696	-0.0232708	0.00371789	-6.25913	3.87122e-10	-0.0173241	0.00251557	-6.88675	5.70827e-12	0.0944939	-0.0173241	0.00251557	6.12962e-10	37	16	30420623	16	30328124	R			NA	NA	ZNF771;ZNF771	NM_001142305;NM_016643	Body;Body	chr16:30418557-30419272	S_Shore			TRUE		16:30420595-30421418	Unclassified	NA	16	30409301	-	ZNF771	ENSG00000102882.12	16	30114105	MAPK3	1	0.0138428	-0.704569
cg05093811	-0.0053376	0.00396231	-1.34709	0.17795	-0.0227903	0.0032573	-6.9967	2.62064e-12	-0.0157522	0.00251621	-6.26028	3.8428e-10	0.00306209	-0.0157522	0.00251621	2.91445e-08	37	3	58059919	3	58034959	R			NA	NA	FLNB;FLNB;FLNB;FLNB	NM_001164319;NM_001164317;NM_001164318;NM_001457	Body;Body;Body;Body					TRUE				NA	3	58074191	-	FLNB	ENSG00000136068.14	3	58008400	FLNB	1	0.0216332	-0.993517
cg05098037	0.0108462	0.00270932	4.00329	6.24675e-05	0.0132728	0.00260541	5.09432	3.5e-07	0.0121069	0.00187796	6.44683	1.14212e-10	0.811898	0.0121069	0.00187796	9.55524e-09	37	17	78753327	17	76367922	F			NA	NA	RPTOR;RPTOR	NM_001163034;NM_020761	Body;Body					NA	17:76367777-76368077			NA	17	80779526	+	RPTOR	ENSG00000141564.15	17	80544819	RPTOR	1	0.0228893	-1.37524
cg05104080	-0.0124717	0.00350207	-3.56123	0.000369128	-0.01737	0.00306272	-5.67142	1.4162e-08	-0.0152472	0.00230545	-6.61353	3.75257e-11	0.5745	-0.0152472	0.00230545	3.42724e-09	37	2	239112693	2	238777432	F			NA	NA	ILKAP	NM_030768	TSS1500	chr2:239111681-239112519	S_Shore			NA	2:238776421-238777505	2:239112132-239112774	Promoter_Associated	NA	2	238204051	+	ILKAP	ENSG00000168427.9	2	238138668	KLHL30	1	0.0315944	1.31859
cg05104080	-0.0124717	0.00350207	-3.56123	0.000369128	-0.01737	0.00306272	-5.67142	1.4162e-08	-0.0152472	0.00230545	-6.61353	3.75257e-11	0.5745	-0.0152472	0.00230545	3.42724e-09	37	2	239112693	2	238777432	F			NA	NA	ILKAP	NM_030768	TSS1500	chr2:239111681-239112519	S_Shore			NA	2:238776421-238777505	2:239112132-239112774	Promoter_Associated	NA	2	238204051	+	ILKAP	ENSG00000178752.16	2	238158970	ERFE	1	0.0237698	1.7042
cg05104080	-0.0124717	0.00350207	-3.56123	0.000369128	-0.01737	0.00306272	-5.67142	1.4162e-08	-0.0152472	0.00230545	-6.61353	3.75257e-11	0.5745	-0.0152472	0.00230545	3.42724e-09	37	2	239112693	2	238777432	F			NA	NA	ILKAP	NM_030768	TSS1500	chr2:239111681-239112519	S_Shore			NA	2:238776421-238777505	2:239112132-239112774	Promoter_Associated	NA	2	238204051	+	ILKAP	ENSG00000144485.11	2	238238267	HES6	1	0.0242775	1.73152
cg05112224	-0.0166593	0.0033202	-5.01757	5.23296e-07	-0.0115699	0.00328708	-3.5198	0.000431869	-0.0140891	0.00233594	-6.03145	1.62497e-09	0.552494	-0.0140891	0.00233594	1.08287e-07	37	22	19017873	22	17397873	R			NA	NA				chr22:19016813-19017919	Island			NA				TRUE	22	19030359	-		ENSG00000274602.5	22	18533646	PI4KAP1	1	0.0291378	-4.27588
cg05112224	-0.0166593	0.0033202	-5.01757	5.23296e-07	-0.0115699	0.00328708	-3.5198	0.000431869	-0.0140891	0.00233594	-6.03145	1.62497e-09	0.552494	-0.0140891	0.00233594	1.08287e-07	37	22	19017873	22	17397873	R			NA	NA				chr22:19016813-19017919	Island			NA				TRUE	22	19030359	-		ENSG00000270393.1	22	19018043	AC000095.1	1	0.0585213	1.86368
cg05112224	-0.0166593	0.0033202	-5.01757	5.23296e-07	-0.0115699	0.00328708	-3.5198	0.000431869	-0.0140891	0.00233594	-6.03145	1.62497e-09	0.552494	-0.0140891	0.00233594	1.08287e-07	37	22	19017873	22	17397873	R			NA	NA				chr22:19016813-19017919	Island			NA				TRUE	22	19030359	-		ENSG00000241527.1	22	19031564	CA15P1	1	0.067752	1.7277
cg05156805	-0.00864154	0.00304674	-2.83632	0.00456362	-0.0177039	0.00343983	-5.14675	2.65044e-07	-0.0126256	0.00228074	-5.53572	3.09947e-08	0.143023	-0.0126256	0.00228074	1.59566e-06	37	22	21318995	22	19648995	F	rs2239959		NA	NA	AIFM3;AIFM3	NM_001018060;NM_144704	TSS1500;TSS1500	chr22:21319178-21319912	N_Shore			NA		22:21318855-21320232	Unclassified_Cell_type_specific	NA	22	20964706	+	AIFM3	ENSG00000183773.15	22	20965108	AIFM3	1	0.0217253	-1.95812
cg05163057	-0.0214302	0.00335651	-6.38465	1.71787e-10	-0.0157747	0.00331544	-4.75795	1.95565e-06	-0.0185676	0.00235876	-7.87178	3.4962e-15	0.487498	-0.0185676	0.00235876	6.67428e-13	37	19	2329403	19	2280403	F			NA	TRUE	SPPL2B;SPPL2B;LSM7	NM_001077238;NM_152988;NM_016199	Body;Body;TSS1500	chr19:2328364-2329089	S_Shore			NA		19:2328209-2330090	Promoter_Associated	NA	19	2329403	+	SPPL2B;LSM7	ENSG00000130332.15	19	2321520	LSM7	1	0.0283291	-1.13748
cg05163510	-0.0122523	0.00325265	-3.76688	0.000165298	-0.0154418	0.00320201	-4.82252	1.41754e-06	-0.0138721	0.00228185	-6.0793	1.20711e-09	0.783373	-0.0138721	0.00228185	8.27308e-08	37	11	67200832	11	66957408	F			NA	NA	RPS6KB2	NM_003952	Body	chr11:67203319-67203662	N_Shelf			NA				NA	11	67433360	+	RPS6KB2	ENSG00000231793.5	11	67612651	DOC2GP	1	0.0495662	-4.00677
cg05201185	-0.0112262	0.00332089	-3.38049	0.000723565	-0.0274895	0.00317348	-8.66224	4.62568e-18	-0.0197268	0.00229433	-8.59805	8.108e-18	0.00189633	-0.0197268	0.00229433	2.42705e-15	37	6	30459139	6	30567118	F	rs62621992		NA	NA	HLA-E	NM_005516	Body	chr6:30457369-30458175	S_Shore			NA				NA	6	30491361	+	HLA-E	ENSG00000204592.9	6	30489509	HLA-E	1	0.0745617	-1.29832
cg05201185	-0.0112262	0.00332089	-3.38049	0.000723565	-0.0274895	0.00317348	-8.66224	4.62568e-18	-0.0197268	0.00229433	-8.59805	8.108e-18	0.00189633	-0.0197268	0.00229433	2.42705e-15	37	6	30459139	6	30567118	F	rs62621992		NA	NA	HLA-E	NM_005516	Body	chr6:30457369-30458175	S_Shore			NA				NA	6	30491361	+	HLA-E	ENSG00000234127.9	6	30184455	TRIM26	1	0.0248788	-0.79136
cg05220114	-0.0220316	0.00440644	-4.99986	5.73713e-07	-0.014783	0.0039541	-3.73864	0.000185018	-0.0180162	0.00294294	-6.12185	9.24951e-10	0.472602	-0.0180162	0.00294294	6.49826e-08	37	19	58223693	19	62915505	R			NA	NA				chr19:58220189-58220517	S_Shelf			NA				NA	19	57712324	-		ENSG00000181894.15	19	58126248	ZNF329	1	0.0281402	-0.824036
cg05220114	-0.0220316	0.00440644	-4.99986	5.73713e-07	-0.014783	0.0039541	-3.73864	0.000185018	-0.0180162	0.00294294	-6.12185	9.24951e-10	0.472602	-0.0180162	0.00294294	6.49826e-08	37	19	58223693	19	62915505	R			NA	NA				chr19:58220189-58220517	S_Shelf			NA				NA	19	57712324	-		ENSG00000176293.19	19	58059239	ZNF135	1	0.0431033	-1.92396
cg05220114	-0.0220316	0.00440644	-4.99986	5.73713e-07	-0.014783	0.0039541	-3.73864	0.000185018	-0.0180162	0.00294294	-6.12185	9.24951e-10	0.472602	-0.0180162	0.00294294	6.49826e-08	37	19	58223693	19	62915505	R			NA	NA				chr19:58220189-58220517	S_Shelf			NA				NA	19	57712324	-		ENSG00000152439.12	19	57499915	ZNF773	1	0.0231548	-0.676197
cg05220114	-0.0220316	0.00440644	-4.99986	5.73713e-07	-0.014783	0.0039541	-3.73864	0.000185018	-0.0180162	0.00294294	-6.12185	9.24951e-10	0.472602	-0.0180162	0.00294294	6.49826e-08	37	19	58223693	19	62915505	R			NA	NA				chr19:58220189-58220517	S_Shelf			NA				NA	19	57712324	-		ENSG00000083814.13	19	57719751	ZNF671	1	0.0936232	-1.13639
cg05220114	-0.0220316	0.00440644	-4.99986	5.73713e-07	-0.014783	0.0039541	-3.73864	0.000185018	-0.0180162	0.00294294	-6.12185	9.24951e-10	0.472602	-0.0180162	0.00294294	6.49826e-08	37	19	58223693	19	62915505	R			NA	NA				chr19:58220189-58220517	S_Shelf			NA				NA	19	57712324	-		ENSG00000152454.4	19	57940833	ZNF256	1	0.0302636	-0.936941
cg05220114	-0.0220316	0.00440644	-4.99986	5.73713e-07	-0.014783	0.0039541	-3.73864	0.000185018	-0.0180162	0.00294294	-6.12185	9.24951e-10	0.472602	-0.0180162	0.00294294	6.49826e-08	37	19	58223693	19	62915505	R			NA	NA				chr19:58220189-58220517	S_Shelf			NA				NA	19	57712324	-		ENSG00000204519.11	19	57681969	ZNF551	1	0.0219443	-0.701098
cg05220114	-0.0220316	0.00440644	-4.99986	5.73713e-07	-0.014783	0.0039541	-3.73864	0.000185018	-0.0180162	0.00294294	-6.12185	9.24951e-10	0.472602	-0.0180162	0.00294294	6.49826e-08	37	19	58223693	19	62915505	R			NA	NA				chr19:58220189-58220517	S_Shelf			NA				NA	19	57712324	-		ENSG00000121417.14	19	57630395	ZNF211	1	0.0268322	-0.6049
cg05220114	-0.0220316	0.00440644	-4.99986	5.73713e-07	-0.014783	0.0039541	-3.73864	0.000185018	-0.0180162	0.00294294	-6.12185	9.24951e-10	0.472602	-0.0180162	0.00294294	6.49826e-08	37	19	58223693	19	62915505	R			NA	NA				chr19:58220189-58220517	S_Shelf			NA				NA	19	57712324	-		ENSG00000178229.8	19	57320472	ZNF543	1	0.0403105	-1.12203
cg05220114	-0.0220316	0.00440644	-4.99986	5.73713e-07	-0.014783	0.0039541	-3.73864	0.000185018	-0.0180162	0.00294294	-6.12185	9.24951e-10	0.472602	-0.0180162	0.00294294	6.49826e-08	37	19	58223693	19	62915505	R			NA	NA				chr19:58220189-58220517	S_Shelf			NA				NA	19	57712324	-		ENSG00000152433.14	19	57363477	ZNF547	1	0.0907739	-2.1289
cg05220114	-0.0220316	0.00440644	-4.99986	5.73713e-07	-0.014783	0.0039541	-3.73864	0.000185018	-0.0180162	0.00294294	-6.12185	9.24951e-10	0.472602	-0.0180162	0.00294294	6.49826e-08	37	19	58223693	19	62915505	R			NA	NA				chr19:58220189-58220517	S_Shelf			NA				NA	19	57712324	-		ENSG00000105136.20	19	57487711	ZNF419	1	0.0170674	-0.55515
cg05220114	-0.0220316	0.00440644	-4.99986	5.73713e-07	-0.014783	0.0039541	-3.73864	0.000185018	-0.0180162	0.00294294	-6.12185	9.24951e-10	0.472602	-0.0180162	0.00294294	6.49826e-08	37	19	58223693	19	62915505	R			NA	NA				chr19:58220189-58220517	S_Shelf			NA				NA	19	57712324	-		ENSG00000179909.15	19	57697367	ZNF154	1	0.0884367	-3.26764
cg05220114	-0.0220316	0.00440644	-4.99986	5.73713e-07	-0.014783	0.0039541	-3.73864	0.000185018	-0.0180162	0.00294294	-6.12185	9.24951e-10	0.472602	-0.0180162	0.00294294	6.49826e-08	37	19	58223693	19	62915505	R			NA	NA				chr19:58220189-58220517	S_Shelf			NA				NA	19	57712324	-		ENSG00000171649.12	19	57578456	ZIK1	1	0.0347654	-1.01686
cg05220114	-0.0220316	0.00440644	-4.99986	5.73713e-07	-0.014783	0.0039541	-3.73864	0.000185018	-0.0180162	0.00294294	-6.12185	9.24951e-10	0.472602	-0.0180162	0.00294294	6.49826e-08	37	19	58223693	19	62915505	R			NA	NA				chr19:58220189-58220517	S_Shelf			NA				NA	19	57712324	-		ENSG00000152443.13	19	57746815	ZNF776	1	0.0223854	-0.565247
cg05220114	-0.0220316	0.00440644	-4.99986	5.73713e-07	-0.014783	0.0039541	-3.73864	0.000185018	-0.0180162	0.00294294	-6.12185	9.24951e-10	0.472602	-0.0180162	0.00294294	6.49826e-08	37	19	58223693	19	62915505	R			NA	NA				chr19:58220189-58220517	S_Shelf			NA				NA	19	57712324	-		ENSG00000131845.14	19	57351307	ZNF304	1	0.0747712	-1.48131
cg05220114	-0.0220316	0.00440644	-4.99986	5.73713e-07	-0.014783	0.0039541	-3.73864	0.000185018	-0.0180162	0.00294294	-6.12185	9.24951e-10	0.472602	-0.0180162	0.00294294	6.49826e-08	37	19	58223693	19	62915505	R			NA	NA				chr19:58220189-58220517	S_Shelf			NA				NA	19	57712324	-		ENSG00000196724.12	19	57921884	ZNF418	1	0.100341	-2.85681
cg05220114	-0.0220316	0.00440644	-4.99986	5.73713e-07	-0.014783	0.0039541	-3.73864	0.000185018	-0.0180162	0.00294294	-6.12185	9.24951e-10	0.472602	-0.0180162	0.00294294	6.49826e-08	37	19	58223693	19	62915505	R			NA	NA				chr19:58220189-58220517	S_Shelf			NA				NA	19	57712324	-		ENSG00000204514.10	19	57848731	ZNF814	1	0.0854693	-1.74182
cg05220114	-0.0220316	0.00440644	-4.99986	5.73713e-07	-0.014783	0.0039541	-3.73864	0.000185018	-0.0180162	0.00294294	-6.12185	9.24951e-10	0.472602	-0.0180162	0.00294294	6.49826e-08	37	19	58223693	19	62915505	R			NA	NA				chr19:58220189-58220517	S_Shelf			NA				NA	19	57712324	-		ENSG00000213762.12	19	57614233	ZNF134	1	0.0401401	-0.704658
cg05220114	-0.0220316	0.00440644	-4.99986	5.73713e-07	-0.014783	0.0039541	-3.73864	0.000185018	-0.0180162	0.00294294	-6.12185	9.24951e-10	0.472602	-0.0180162	0.00294294	6.49826e-08	37	19	58223693	19	62915505	R			NA	NA				chr19:58220189-58220517	S_Shelf			NA				NA	19	57712324	-		ENSG00000197128.11	19	57466663	ZNF772	1	0.0228837	-1.09532
cg05220114	-0.0220316	0.00440644	-4.99986	5.73713e-07	-0.014783	0.0039541	-3.73864	0.000185018	-0.0180162	0.00294294	-6.12185	9.24951e-10	0.472602	-0.0180162	0.00294294	6.49826e-08	37	19	58223693	19	62915505	R			NA	NA				chr19:58220189-58220517	S_Shelf			NA				NA	19	57712324	-		ENSG00000186272.12	19	57411163	ZNF17	1	0.0144341	-0.553044
cg05220114	-0.0220316	0.00440644	-4.99986	5.73713e-07	-0.014783	0.0039541	-3.73864	0.000185018	-0.0180162	0.00294294	-6.12185	9.24951e-10	0.472602	-0.0180162	0.00294294	6.49826e-08	37	19	58223693	19	62915505	R			NA	NA				chr19:58220189-58220517	S_Shelf			NA				NA	19	57712324	-		ENSG00000105146.12	19	57230802	AURKC	1	0.0202302	-0.68746
cg05220114	-0.0220316	0.00440644	-4.99986	5.73713e-07	-0.014783	0.0039541	-3.73864	0.000185018	-0.0180162	0.00294294	-6.12185	9.24951e-10	0.472602	-0.0180162	0.00294294	6.49826e-08	37	19	58223693	19	62915505	R			NA	NA				chr19:58220189-58220517	S_Shelf			NA				NA	19	57712324	-		ENSG00000121413.12	19	58083838	ZSCAN18	1	0.0266477	-1.14076
cg05220114	-0.0220316	0.00440644	-4.99986	5.73713e-07	-0.014783	0.0039541	-3.73864	0.000185018	-0.0180162	0.00294294	-6.12185	9.24951e-10	0.472602	-0.0180162	0.00294294	6.49826e-08	37	19	58223693	19	62915505	R			NA	NA				chr19:58220189-58220517	S_Shelf			NA				NA	19	57712324	-		ENSG00000256060.2	19	57363511	TRAPPC2B	1	0.0797666	-1.84188
cg05227215	-0.00451142	0.00162461	-2.77692	0.00548759	-0.00911948	0.00114304	-7.97828	1.48384e-15	-0.00759369	0.00093484	-8.12299	4.54835e-16	0.0678362	-0.00759369	0.00093484	1.00442e-13	37	5	139057496	5	139037680	R			NA	NA	CXXC5	NM_016463	5'UTR	chr5:139056577-139056856	S_Shore			TRUE				NA	5	139677910	-	CXXC5	ENSG00000171604.12	5	139647299	CXXC5	1	0.045668	-6.20977
cg05227621	-0.0207833	0.00674378	-3.08184	0.00205723	-0.0212774	0.00449507	-4.73349	2.2069e-06	-0.0211254	0.00374032	-5.64801	1.62318e-08	0.998143	-0.0211254	0.00374032	8.89731e-07	37	22	42313995	22	40643941	F		rs73165126	NA	NA				chr22:42315502-42316409	N_Shore			NA				TRUE	22	41917990	+		ENSG00000183172.8	22	42079691	SMDT1	1	0.0580531	1.99824
cg05227621	-0.0207833	0.00674378	-3.08184	0.00205723	-0.0212774	0.00449507	-4.73349	2.2069e-06	-0.0211254	0.00374032	-5.64801	1.62318e-08	0.998143	-0.0211254	0.00374032	8.89731e-07	37	22	42313995	22	40643941	F		rs73165126	NA	NA				chr22:42315502-42316409	N_Shore			NA				TRUE	22	41917990	+		ENSG00000177096.9	22	42074248	PHETA2	1	0.0171273	0.680652
cg05227621	-0.0207833	0.00674378	-3.08184	0.00205723	-0.0212774	0.00449507	-4.73349	2.2069e-06	-0.0211254	0.00374032	-5.64801	1.62318e-08	0.998143	-0.0211254	0.00374032	8.89731e-07	37	22	42313995	22	40643941	F		rs73165126	NA	NA				chr22:42315502-42316409	N_Shore			NA				TRUE	22	41917990	+		ENSG00000100197.22	22	42126499	CYP2D6	1	0.0389129	-2.27712
cg05227621	-0.0207833	0.00674378	-3.08184	0.00205723	-0.0212774	0.00449507	-4.73349	2.2069e-06	-0.0211254	0.00374032	-5.64801	1.62318e-08	0.998143	-0.0211254	0.00374032	8.89731e-07	37	22	42313995	22	40643941	F		rs73165126	NA	NA				chr22:42315502-42316409	N_Shore			NA				TRUE	22	41917990	+		ENSG00000205702.11	22	42140203	CYP2D7	1	0.0156932	0.918951
cg05231308	-0.00751974	0.00464289	-1.61962	0.105313	-0.0290004	0.0043743	-6.62973	3.36313e-11	-0.0188993	0.00318382	-5.93606	2.91951e-09	0.00344853	-0.0188993	0.00318382	1.84848e-07	37	2	27531163	2	27384667	F	rs77131692		NA	NA	UCN	NM_003353	TSS200	chr2:27529083-27531465	Island			NA	2:27382599-27384952			TRUE	2	27308294	+	UCN	ENSG00000163794.6	2	27307400	UCN	1	0.0232234	0.988663
cg05232694	-0.0154111	0.00442043	-3.48634	0.000489675	-0.0323096	0.00627581	-5.14828	2.62891e-07	-0.0210148	0.00361394	-5.81492	6.06633e-09	0.088653	-0.0210148	0.00361394	3.6206e-07	37	20	48809539	20	48242946	R			NA	NA				chr20:48806598-48809022	S_Shore		RDMR	NA				NA	20	50193001	-		ENSG00000196396.10	20	50510321	PTPN1	1	0.0135649	-0.243159
cg05261851	-0.0151018	0.00260477	-5.79777	6.72045e-09	-0.0166301	0.00255817	-6.50079	7.98994e-11	-0.0158798	0.00182515	-8.70052	3.30356e-18	0.91611	-0.0158798	0.00182515	1.0533e-15	37	16	68001206	16	66558707	R			NA	NA	SLC12A4;SLC12A4;SLC12A4;SLC12A4	NM_001145961;NM_001145962;NM_005072;NM_001145964	Body;Body;Body;TSS1500	chr16:68001916-68002462	N_Shore		RDMR	TRUE				NA	16	67967302	-	SLC12A4	ENSG00000213398.7	16	67939750	LCAT	1	0.0222316	-1.78747
cg05261851	-0.0151018	0.00260477	-5.79777	6.72045e-09	-0.0166301	0.00255817	-6.50079	7.98994e-11	-0.0158798	0.00182515	-8.70052	3.30356e-18	0.91611	-0.0158798	0.00182515	1.0533e-15	37	16	68001206	16	66558707	R			NA	NA	SLC12A4;SLC12A4;SLC12A4;SLC12A4	NM_001145961;NM_001145962;NM_005072;NM_001145964	Body;Body;Body;TSS1500	chr16:68001916-68002462	N_Shore		RDMR	TRUE				NA	16	67967302	-	SLC12A4	ENSG00000124067.17	16	67943474	SLC12A4	1	0.0137046	-1.28103
cg05285244	-0.0191105	0.00427519	-4.47008	7.81886e-06	-0.0173403	0.00435493	-3.98177	6.84054e-05	-0.0182417	0.00305082	-5.9793	2.24105e-09	0.958804	-0.0182417	0.00305082	1.45384e-07	37	7	149412760	7	149043693	R			NA	NA	KRBA1	NM_032534	5'UTR	chr7:149410858-149412351	S_Shore			TRUE				NA	7	149715668	-	KRBA1	ENSG00000133619.17	7	149714781	KRBA1	1	0.0167739	-0.52249
cg05302531	-0.0119379	0.00418471	-2.85274	0.00433438	-0.0276285	0.00481665	-5.73604	9.69183e-09	-0.018687	0.003159	-5.91549	3.30889e-09	0.0486253	-0.018687	0.003159	2.07759e-07	37	7	101936362	7	101723082	F	rs34606939		NA	NA	SH2B2	NM_020979	Body	chr7:101936317-101936548	Island			NA	7:101723065-101723182	7:101936011-101936442	Unclassified_Cell_type_specific	NA	7	102293095	+	SH2B2	ENSG00000160991.16	7	102433106	ORAI2	1	0.0255676	-0.868066
cg05302531	-0.0119379	0.00418471	-2.85274	0.00433438	-0.0276285	0.00481665	-5.73604	9.69183e-09	-0.018687	0.003159	-5.91549	3.30889e-09	0.0486253	-0.018687	0.003159	2.07759e-07	37	7	101936362	7	101723082	F	rs34606939		NA	NA	SH2B2	NM_020979	Body	chr7:101936317-101936548	Island			NA	7:101723065-101723182	7:101936011-101936442	Unclassified_Cell_type_specific	NA	7	102293095	+	SH2B2	ENSG00000257923.11	7	101815904	CUX1	1	0.018089	-0.412449
cg05361273	-0.00296717	0.00231743	-1.28037	0.200415	-0.0123664	0.00179438	-6.89173	5.51165e-12	-0.0088434	0.00141879	-6.23306	4.57415e-10	0.00584505	-0.0088434	0.00141879	3.4116e-08	37	2	128410029	2	128126499	F			NA	NA	GPR17;LIMS2;GPR17;GPR17;LIMS2;LIMS2;LIMS2;GPR17	NM_001161416;NM_001136037;NM_001161415;NM_005291;NM_001161403;NM_017980;NM_001161404;NM_001161417	3'UTR;Body;3'UTR;3'UTR;Body;Body;Body;3'UTR	chr2:128410563-128410804	N_Shore			NA				NA	2	127652454	+	GPR17;LIMS2	ENSG00000169994.18	2	127535802	MYO7B	1	0.0352584	-5.43152
cg05361273	-0.00296717	0.00231743	-1.28037	0.200415	-0.0123664	0.00179438	-6.89173	5.51165e-12	-0.0088434	0.00141879	-6.23306	4.57415e-10	0.00584505	-0.0088434	0.00141879	3.4116e-08	37	2	128410029	2	128126499	F			NA	NA	GPR17;LIMS2;GPR17;GPR17;LIMS2;LIMS2;LIMS2;GPR17	NM_001161416;NM_001136037;NM_001161415;NM_005291;NM_001161403;NM_017980;NM_001161404;NM_001161417	3'UTR;Body;3'UTR;3'UTR;Body;Body;Body;3'UTR	chr2:128410563-128410804	N_Shore			NA				NA	2	127652454	+	GPR17;LIMS2	ENSG00000072163.19	2	127638381	LIMS2	1	0.0176014	-2.79545
cg05361728	-0.00481343	0.00170431	-2.82426	0.00473898	-0.00794146	0.00164856	-4.8172	1.45585e-06	-0.00642944	0.00118493	-5.42601	5.76267e-08	0.418894	-0.00642944	0.00118493	2.80647e-06	37	17	81010244	17	78603533	F			NA	NA	B3GNTL1	NM_001009905	TSS1500	chr17:81009245-81009999	S_Shore			NA		17:81008952-81010339	Promoter_Associated	NA	17	83052367	+	B3GNTL1	ENSG00000175711.8	17	82942155	B3GNTL1	1	0.0185251	2.15341
cg05377527	-0.0108019	0.00227656	-4.74485	2.08657e-06	-0.0134587	0.00240857	-5.58784	2.29914e-08	-0.0120555	0.00165447	-7.28663	3.17807e-13	0.725205	-0.0120555	0.00165447	4.31444e-11	37	11	47586666	11	47543242	R			NA	NA	PTPMT1;PTPMT1	NM_175732;NM_001143984	TSS1500;TSS1500	chr11:47586848-47587608	N_Shore			NA				TRUE	11	47565113	-	PTPMT1	ENSG00000134575.10	11	47239302	ACP2	1	0.0285134	1.91244
cg05377527	-0.0108019	0.00227656	-4.74485	2.08657e-06	-0.0134587	0.00240857	-5.58784	2.29914e-08	-0.0120555	0.00165447	-7.28663	3.17807e-13	0.725205	-0.0120555	0.00165447	4.31444e-11	37	11	47586666	11	47543242	R			NA	NA	PTPMT1;PTPMT1	NM_175732;NM_001143984	TSS1500;TSS1500	chr11:47586848-47587608	N_Shore			NA				TRUE	11	47565113	-	PTPMT1	ENSG00000134571.10	11	47331397	MYBPC3	1	0.0567283	-4.73975
cg05377527	-0.0108019	0.00227656	-4.74485	2.08657e-06	-0.0134587	0.00240857	-5.58784	2.29914e-08	-0.0120555	0.00165447	-7.28663	3.17807e-13	0.725205	-0.0120555	0.00165447	4.31444e-11	37	11	47586666	11	47543242	R			NA	NA	PTPMT1;PTPMT1	NM_175732;NM_001143984	TSS1500;TSS1500	chr11:47586848-47587608	N_Shore			NA				TRUE	11	47565113	-	PTPMT1	ENSG00000172247.4	11	47589667	C1QTNF4	1	0.0422858	-2.06902
cg05379350	-0.00897345	0.00248159	-3.61601	0.000299178	-0.015977	0.00251031	-6.36454	1.95873e-10	-0.0124349	0.00176482	-7.04602	1.84112e-12	0.139696	-0.0124349	0.00176482	2.16548e-10	37	17	27917157	17	24941283	R			NA	TRUE	GIT1;GIT1	NM_014030;NM_001085454	TSS1500;TSS1500	chr17:27918161-27918398	N_Shore			NA	17:24939942-24941695			NA	17	29590138	-	GIT1	ENSG00000141298.19	17	29625938	SSH2	1	0.01618	-0.913845
cg05381795	-0.0117008	0.00294306	-3.97573	7.01623e-05	-0.0255589	0.00259904	-9.83397	8.03858e-23	-0.0194868	0.00194813	-10.0028	1.48119e-23	0.00197237	-0.0194868	0.00194813	1.12202e-20	37	20	62713085	20	62183529	R			NA	NA	OPRL1;OPRL1	NM_000913;NM_182647	5'UTR;5'UTR	chr20:62714763-62715761	N_Shore			NA		20:62713058-62713226	Unclassified_Cell_type_specific	NA	20	64081731	-	OPRL1	ENSG00000125510.16	20	64080082	OPRL1	1	0.02541	-1.57463
cg05418105	0.0196871	0.00432581	4.55109	5.33697e-06	0.0189937	0.00471407	4.02916	5.59771e-05	0.0193702	0.00318725	6.0774	1.2215e-09	0.994144	0.0193702	0.00318725	8.36525e-08	37	22	50981406	22	49328272	F	rs131784		NA	NA				chr22:50982570-50982994	N_Shore			NA				NA	22	50542976	+		ENSG00000130487.8	22	50546203	KLHDC7B	1	0.0199419	-1.06129
cg05418105	0.0196871	0.00432581	4.55109	5.33697e-06	0.0189937	0.00471407	4.02916	5.59771e-05	0.0193702	0.00318725	6.0774	1.2215e-09	0.994144	0.0193702	0.00318725	8.36525e-08	37	22	50981406	22	49328272	F	rs131784		NA	NA				chr22:50982570-50982994	N_Shore			NA				NA	22	50542976	+		ENSG00000130489.14	22	50523568	SCO2	1	0.0361247	-1.80098
cg05418105	0.0196871	0.00432581	4.55109	5.33697e-06	0.0189937	0.00471407	4.02916	5.59771e-05	0.0193702	0.00318725	6.0774	1.2215e-09	0.994144	0.0193702	0.00318725	8.36525e-08	37	22	50981406	22	49328272	F	rs131784		NA	NA				chr22:50982570-50982994	N_Shore			NA				NA	22	50542976	+		ENSG00000284194.1	22	50523568	SCO2	1	0.0196186	-1.29662
cg05418719	-0.0204105	0.00308908	-6.6073	3.91392e-11	-0.0214356	0.00305278	-7.02167	2.19232e-12	-0.0209291	0.00217136	-9.6387	5.48782e-22	0.972528	-0.0209291	0.00217136	3.24957e-19	37	17	54676595	17	52031594	R			NA	NA				chr17:54674873-54675232	S_Shore			NA		17:54676441-54676727	Unclassified_Cell_type_specific	NA	17	56599233	-		ENSG00000183691.4	17	56593699	NOG	1	0.0366032	-3.26402
cg05428706	-0.0180862	0.0033258	-5.43816	5.38323e-08	-0.0271879	0.0033545	-8.1049	5.27871e-16	-0.022598	0.00236178	-9.56821	1.08778e-21	0.156253	-0.022598	0.00236178	6.09453e-19	37	10	102730130	10	102720120	F			NA	NA				chr10:102729299-102729710	S_Shore			NA				TRUE	10	100970372	+		ENSG00000055950.16	10	100969458	MRPL43	1	0.019674	0.651887
cg05460571	-0.00626037	0.00295353	-2.11962	0.0340381	-0.0193924	0.0025841	-7.5045	6.16626e-14	-0.0136986	0.00194481	-7.04365	1.87273e-12	0.00370271	-0.0136986	0.00194481	2.2015e-10	37	8	8630364	8	8667774	R			NA	NA								TRUE				NA	8	8772853	-		ENSG00000233609.3	8	8961200	RPL10P19	1	0.0144095	1.82298
cg05487507	-0.0183763	0.00454909	-4.03954	5.35554e-05	-0.0246979	0.00457765	-5.39532	6.84013e-08	-0.0215173	0.00322674	-6.66842	2.58565e-11	0.618933	-0.0215173	0.00322674	2.44003e-09	37	17	46671861	17	44026860	F	rs3054557		NA	NA	LOC404266;LOC404266;LOC404266;HOXB5;LOC404266;LOC404266	NR_033203;NR_033204;NR_033201;NM_002147;NR_033205;NR_033202	Body;Body;Body;TSS1500;TSS1500;Body	chr17:46673532-46674181	N_Shore			NA	17:44026708-44027269	17:46670594-46672443	Unclassified	NA	17	48594498	+	LOC404266;HOXB5	ENSG00000173917.10	17	48540894	HOXB2	1	0.0163887	1.68531
cg05496363	-0.00695396	0.00200388	-3.47025	0.00051997	-0.0122707	0.00202221	-6.06795	1.29549e-09	-0.00958811	0.00142339	-6.7361	1.62696e-11	0.174846	-0.00958811	0.00142339	1.59691e-09	37	11	66083766	11	65840342	F	rs3741368		NA	NA	CD248	NM_020404	1stExon	chr11:66083572-66083782	Island			NA	11:65840060-65841164			NA	11	66316294	+	CD248	ENSG00000174807.4	11	66314494	CD248	1	0.0944621	-7.56477
cg05508558	-0.0174142	0.00351314	-4.95689	7.16317e-07	-0.0274784	0.00316233	-8.68931	3.6466e-18	-0.0229738	0.00235037	-9.77452	1.44836e-22	0.103652	-0.0229738	0.00235037	9.25574e-20	37	1	207627372	1	205693995	F			NA	TRUE	CR2;CR2	NM_001006658;NM_001877	TSS1500;TSS1500	chr1:207627531-207628280	N_Shore			NA				NA	1	207454026	+	CR2	ENSG00000196352.15	1	207321376	CD55	1	0.0171834	-1.42029
cg05549575	0.0141383	0.00208265	6.78858	1.1324e-11	0.00656497	0.00197294	3.3275	0.000876278	0.0101469	0.0014323	7.08436	1.3969e-12	0.0306689	0.0101469	0.0014323	1.68619e-10	37	17	5137892	17	5078616	R			NA	NA	C17orf87	NM_207103	Body					NA		17:5137831-5138227	Unclassified_Cell_type_specific	NA	17	5234596	-	C17orf87	ENSG00000161929.15	17	5208920	SCIMP	1	0.0145735	-1.65428
cg05563595	-0.0163049	0.00307473	-5.30289	1.13986e-07	-0.0163852	0.00265316	-6.17573	6.58601e-10	-0.0163509	0.00200871	-8.14001	3.95239e-16	0.999805	-0.0163509	0.00200871	8.85546e-14	37	6	30140305	6	30248284	R			NA	NA	TRIM15	NM_033229	3'UTR	chr6:30139718-30140263	S_Shore			TRUE				NA	6	30172527	-	TRIM15	ENSG00000230795.3	6	29926459	HLA-K	1	0.013809	-2.52976
cg05564251	0.0103715	0.0025068	4.13734	3.51354e-05	0.0106294	0.00247974	4.28648	1.81525e-05	0.0105018	0.00176293	5.95703	2.56868e-09	0.997329	0.0105018	0.00176293	1.64529e-07	37	2	231090640	2	230798884	R			NA	TRUE	SP140;SP140	NM_001005176;NM_007237	Body;Body					NA		2:231090068-231091293	Promoter_Associated	NA	2	230225924	-	SP140	ENSG00000079263.19	2	230203110	SP140	1	0.018255	-2.19771
cg05573654	0.0161678	0.00295668	5.46823	4.54546e-08	0.0075267	0.00250882	3.00009	0.00269901	0.0111439	0.00191296	5.82548	5.69503e-09	0.0834951	0.0111439	0.00191296	3.41823e-07	37	5	1518179	5	1571179	R			NA	NA	LPCAT1	NM_024830	Body					NA	5:1570988-1571228			NA	5	1518063	-	LPCAT1	ENSG00000153395.10	5	1456480	LPCAT1	1	0.0223585	-1.0227
cg05575921	-0.0238352	0.00572667	-4.16214	3.15278e-05	-0.0288736	0.00703008	-4.10714	4.00583e-05	-0.0258449	0.00443999	-5.82093	5.85195e-09	0.856948	-0.0258449	0.00443999	3.5036e-07	37	5	373378	5	426378	F			NA	NA	AHRR	NM_020731	Body	chr5:373842-374426	N_Shore			TRUE				NA	5	373262	+	AHRR	ENSG00000063438.17	5	321759	AHRR	1	0.0889022	-1.19365
cg05586607	-0.0433095	0.00516057	-8.39238	4.76383e-17	-0.0338178	0.00522321	-6.47452	9.51128e-11	-0.0386209	0.00367102	-10.5205	6.95194e-26	0.433645	-0.0386209	0.00367102	8.00134e-23	37	11	1965447	11	1922023	F			NA	NA				chr11:1968558-1969003	N_Shelf		CDMR	NA				NA	11	1944216	+		ENSG00000214026.11	11	1947278	MRPL23	1	0.0743771	3.0642
cg05638439	-0.0234096	0.00703893	-3.32573	0.000881881	-0.0380741	0.00744992	-5.11067	3.21022e-07	-0.0303262	0.0051164	-5.92725	3.08057e-09	0.359309	-0.0303262	0.0051164	1.94217e-07	37	16	711235	16	651236	F			NA	NA	WDR90	NM_145294	Body	chr16:711065-711414	Island			TRUE	16:650649-651454	16:710398-711587	Gene_Associated	NA	16	661234	+	WDR90	ENSG00000130731.16	16	634427	METTL26	1	0.027096	-0.437477
cg05638439	-0.0234096	0.00703893	-3.32573	0.000881881	-0.0380741	0.00744992	-5.11067	3.21022e-07	-0.0303262	0.0051164	-5.92725	3.08057e-09	0.359309	-0.0303262	0.0051164	1.94217e-07	37	16	711235	16	651236	F			NA	NA	WDR90	NM_145294	Body	chr16:711065-711414	Island			TRUE	16:650649-651454	16:710398-711587	Gene_Associated	NA	16	661234	+	WDR90	ENSG00000103245.14	16	729760	CIAO3	1	0.0217482	-0.365489
cg05638439	-0.0234096	0.00703893	-3.32573	0.000881881	-0.0380741	0.00744992	-5.11067	3.21022e-07	-0.0303262	0.0051164	-5.92725	3.08057e-09	0.359309	-0.0303262	0.0051164	1.94217e-07	37	16	711235	16	651236	F			NA	NA	WDR90	NM_145294	Body	chr16:711065-711414	Island			TRUE	16:650649-651454	16:710398-711587	Gene_Associated	NA	16	661234	+	WDR90	ENSG00000127580.17	16	684622	WDR24	1	0.0162575	-0.342568
cg05638439	-0.0234096	0.00703893	-3.32573	0.000881881	-0.0380741	0.00744992	-5.11067	3.21022e-07	-0.0303262	0.0051164	-5.92725	3.08057e-09	0.359309	-0.0303262	0.0051164	1.94217e-07	37	16	711235	16	651236	F			NA	NA	WDR90	NM_145294	Body	chr16:711065-711414	Island			TRUE	16:650649-651454	16:710398-711587	Gene_Associated	NA	16	661234	+	WDR90	ENSG00000127578.7	16	629239	WFIKKN1	1	0.0435831	-0.793527
cg05638439	-0.0234096	0.00703893	-3.32573	0.000881881	-0.0380741	0.00744992	-5.11067	3.21022e-07	-0.0303262	0.0051164	-5.92725	3.08057e-09	0.359309	-0.0303262	0.0051164	1.94217e-07	37	16	711235	16	651236	F			NA	NA	WDR90	NM_145294	Body	chr16:711065-711414	Island			TRUE	16:650649-651454	16:710398-711587	Gene_Associated	NA	16	661234	+	WDR90	ENSG00000103269.13	16	675666	RHBDL1	1	0.0228532	-0.5549
cg05644767	-0.0126	0.00345023	-3.65194	0.000260262	-0.0219541	0.00373402	-5.87946	4.11599e-09	-0.0169081	0.00253408	-6.6723	2.51828e-11	0.184039	-0.0169081	0.00253408	2.38201e-09	37	16	31366118	16	31273619	F	rs77493918		NA	NA	ITGAX	NM_000887	TSS1500					NA				NA	16	31354796	+	ITGAX	ENSG00000156886.11	16	31393312	ITGAD	1	0.0160862	-1.56123
cg05644767	-0.0126	0.00345023	-3.65194	0.000260262	-0.0219541	0.00373402	-5.87946	4.11599e-09	-0.0169081	0.00253408	-6.6723	2.51828e-11	0.184039	-0.0169081	0.00253408	2.38201e-09	37	16	31366118	16	31273619	F	rs77493918		NA	NA	ITGAX	NM_000887	TSS1500					NA				NA	16	31354796	+	ITGAX	ENSG00000140678.16	16	31355134	ITGAX	1	0.0586364	-1.80875
cg05647197	-0.0213858	0.00370832	-5.76699	8.07019e-09	-0.00706668	0.00357093	-1.97895	0.047822	-0.0139561	0.00257223	-5.42568	5.77345e-08	0.0208964	-0.0139561	0.00257223	2.8108e-06	37	2	10182525	2	10099976	R			NA	NA	KLF11	NM_003597	TSS1500	chr2:10182635-10184702	N_Shore			NA	2:10099764-10102153			NA	2	10042397	-	KLF11	ENSG00000172059.11	2	10042849	KLF11	1	0.0169684	-1.74258
cg05654765	-0.0198117	0.00508037	-3.89965	9.63312e-05	-0.026373	0.00562239	-4.69071	2.72264e-06	-0.0227609	0.00376946	-6.03823	1.5581e-09	0.687381	-0.0227609	0.00376946	1.04315e-07	37	3	49170727	3	49145731	F			NA	NA	LAMB2	NM_002292	TSS200					NA	3:49145500-49145830	3:49170352-49170938	Unclassified	NA	3	49133293	+	LAMB2	ENSG00000172037.14	3	49121114	LAMB2	1	0.267818	-4.09548
cg05661533	0.0201106	0.00301289	6.67485	2.47491e-11	0.0104769	0.00428584	2.44453	0.0145042	0.0169243	0.00246479	6.86643	6.58303e-12	0.184383	0.0169243	0.00246479	6.98642e-10	37	5	1495043	5	1548043	R			NA	NA	LPCAT1	NM_024830	Body	chr5:1494853-1495287	Island			NA	5:1547887-1548318	5:1494867-1495821	Unclassified	NA	5	1494927	-	LPCAT1	ENSG00000153395.10	5	1456480	LPCAT1	1	0.0434372	-1.45926
cg05668853	-0.0195129	0.00406653	-4.79843	1.59918e-06	-0.0215406	0.00374899	-5.74571	9.15345e-09	-0.020609	0.00275636	-7.47688	7.6109e-14	0.935009	-0.020609	0.00275636	1.15859e-11	37	17	27044169	17	24068296	R			NA	TRUE	RAB34;RAB34;RAB34;RAB34;RAB34;RAB34;RAB34	NM_001144943;NR_024579;NM_001142624;NM_001142625;NR_024575;NM_001144942;NM_031934	Body;Body;Body;Body;Body;Body;Body	chr17:27044168-27045049	Island			NA				NA	17	28717150	-	RAB34	ENSG00000167525.13	17	28703197	PROCA1	1	0.0221527	-1.43796
cg05668853	-0.0195129	0.00406653	-4.79843	1.59918e-06	-0.0215406	0.00374899	-5.74571	9.15345e-09	-0.020609	0.00275636	-7.47688	7.6109e-14	0.935009	-0.020609	0.00275636	1.15859e-11	37	17	27044169	17	24068296	R			NA	TRUE	RAB34;RAB34;RAB34;RAB34;RAB34;RAB34;RAB34	NM_001144943;NR_024579;NM_001142624;NM_001142625;NR_024575;NM_001144942;NM_031934	Body;Body;Body;Body;Body;Body;Body	chr17:27044168-27045049	Island			NA				NA	17	28717150	-	RAB34	ENSG00000109113.20	17	28714281	RAB34	1	0.171354	-4.68561
cg05676562	-0.0168717	0.00288533	-5.84739	4.99344e-09	-0.0201398	0.0031294	-6.43568	1.22918e-10	-0.0183734	0.00212128	-8.66144	4.65851e-18	0.744714	-0.0183734	0.00212128	1.44901e-15	37	16	30102457	16	30009958	R			NA	NA	TBX6	NM_004608	Body	chr16:30102816-30103695	N_Shore			NA	16:30009906-30010068			NA	16	30091135	-	TBX6	ENSG00000102886.15	16	30104810	GDPD3	1	0.0173346	0.646353
cg05676562	-0.0168717	0.00288533	-5.84739	4.99344e-09	-0.0201398	0.0031294	-6.43568	1.22918e-10	-0.0183734	0.00212128	-8.66144	4.65851e-18	0.744714	-0.0183734	0.00212128	1.44901e-15	37	16	30102457	16	30009958	R			NA	NA	TBX6	NM_004608	Body	chr16:30102816-30103695	N_Shore			NA	16:30009906-30010068			NA	16	30091135	-	TBX6	ENSG00000090238.11	16	30092314	YPEL3	1	0.0462024	-0.703153
cg05676562	-0.0168717	0.00288533	-5.84739	4.99344e-09	-0.0201398	0.0031294	-6.43568	1.22918e-10	-0.0183734	0.00212128	-8.66144	4.65851e-18	0.744714	-0.0183734	0.00212128	1.44901e-15	37	16	30102457	16	30009958	R			NA	NA	TBX6	NM_004608	Body	chr16:30102816-30103695	N_Shore			NA	16:30009906-30010068			NA	16	30091135	-	TBX6	ENSG00000149922.10	16	30085793	TBX6	1	0.0581503	-1.16954
cg05683445	-0.0118838	0.00283474	-4.19219	2.76276e-05	-0.0218647	0.00332546	-6.57492	4.86795e-11	-0.0160842	0.00215731	-7.45566	8.94174e-14	0.0736407	-0.0160842	0.00215731	1.34873e-11	37	16	28303182	16	28210683	F			NA	NA	SBK1	NM_001024401	TSS1500	chr16:28303973-28304770	N_Shore			NA				NA	16	28291860	+	SBK1	ENSG00000197165.11	16	28591943	SULT1A2	1	0.0618153	7.44488
cg05683445	-0.0118838	0.00283474	-4.19219	2.76276e-05	-0.0218647	0.00332546	-6.57492	4.86795e-11	-0.0160842	0.00215731	-7.45566	8.94174e-14	0.0736407	-0.0160842	0.00215731	1.34873e-11	37	16	28303182	16	28210683	F			NA	NA	SBK1	NM_001024401	TSS1500	chr16:28303973-28304770	N_Shore			NA				NA	16	28291860	+	SBK1	ENSG00000246465.1	16	28284885	AC138904.1	1	0.0138074	-0.943905
cg05683445	-0.0118838	0.00283474	-4.19219	2.76276e-05	-0.0218647	0.00332546	-6.57492	4.86795e-11	-0.0160842	0.00215731	-7.45566	8.94174e-14	0.0736407	-0.0160842	0.00215731	1.34873e-11	37	16	28303182	16	28210683	F			NA	NA	SBK1	NM_001024401	TSS1500	chr16:28303973-28304770	N_Shore			NA				NA	16	28291860	+	SBK1	ENSG00000233232.7	16	28456372	NPIPB7	1	0.0224757	-1.09204
cg05683445	-0.0118838	0.00283474	-4.19219	2.76276e-05	-0.0218647	0.00332546	-6.57492	4.86795e-11	-0.0160842	0.00215731	-7.45566	8.94174e-14	0.0736407	-0.0160842	0.00215731	1.34873e-11	37	16	28303182	16	28210683	F			NA	NA	SBK1	NM_001024401	TSS1500	chr16:28303973-28304770	N_Shore			NA				NA	16	28291860	+	SBK1	ENSG00000176476.9	16	28553915	SGF29	1	0.019952	-1.09582
cg05697866	-0.0207332	0.00460563	-4.5017	6.74108e-06	-0.0150604	0.00395555	-3.80742	0.000140426	-0.0174685	0.00300074	-5.8214	5.83575e-09	0.646266	-0.0174685	0.00300074	3.49516e-07	37	1	2437200	1	2427060	F			NA	NA				chr1:2435041-2435257	S_Shore			NA	1:2426878-2427090	1:2437063-2438613	Unclassified	NA	1	2505760	+		ENSG00000149527.18	1	2425980	PLCH2	1	0.0166263	1.39885
cg05705813	-0.0130169	0.00323018	-4.02977	5.58315e-05	-0.0141875	0.00338264	-4.19421	2.73825e-05	-0.0135752	0.00233612	-5.81101	6.20984e-09	0.969166	-0.0135752	0.00233612	3.69684e-07	37	11	86383809	11	86061457	R			NA	NA	ME3;ME3;ME3	NM_001014811;NM_001161586;NM_006680	TSS1500;TSS200;TSS1500	chr11:86382695-86383586	S_Shore			NA				NA	11	86672766	-	ME3	ENSG00000151376.16	11	86441108	ME3	1	0.0912907	-4.47408
cg05705813	-0.0130169	0.00323018	-4.02977	5.58315e-05	-0.0141875	0.00338264	-4.19421	2.73825e-05	-0.0135752	0.00233612	-5.81101	6.20984e-09	0.969166	-0.0135752	0.00233612	3.69684e-07	37	11	86383809	11	86061457	R			NA	NA	ME3;ME3;ME3	NM_001014811;NM_001161586;NM_006680	TSS1500;TSS200;TSS1500	chr11:86382695-86383586	S_Shore			NA				NA	11	86672766	-	ME3	ENSG00000278989.1	11	86434924	AP001148.1	1	0.0205035	-0.750909
cg05709162	-0.0101479	0.00304187	-3.33607	0.000849724	-0.0152899	0.00292512	-5.22709	1.72195e-07	-0.0128195	0.00210844	-6.08007	1.2013e-09	0.476016	-0.0128195	0.00210844	8.2371e-08	37	3	113160071	3	114642761	R			NA	NA	WDR52;WDR52	NM_001164496;NM_018338	5'UTR;5'UTR	chr3:113160299-113160641	N_Shore			NA	3:114642704-114643181			NA	3	113441223	-	WDR52	ENSG00000206530.11	3	113286930	CFAP44	1	0.0312895	1.36086
cg05779272	-0.0045949	0.00198542	-2.31432	0.02065	-0.012928	0.00219479	-5.89029	3.85513e-09	-0.00834509	0.00147237	-5.66778	1.44656e-08	0.0189884	-0.00834509	0.00147237	8.00495e-07	37	9	33168018	9	33158018	F	rs73472946		NA	TRUE	B4GALT1	NM_001497	TSS1500	chr9:33166700-33167934	S_Shore			NA				NA	9	33168019	+	B4GALT1	ENSG00000086062.12	9	33104082	B4GALT1	1	0.0160824	-1.04647
cg05781984	-0.00562305	0.00178167	-3.15605	0.00159923	-0.007163	0.00140015	-5.11589	3.12264e-07	-0.00657506	0.00110088	-5.97253	2.336e-09	0.793803	-0.00657506	0.00110088	1.50994e-07	37	6	43237642	6	43345620	F			NA	NA	TTBK1	NM_032538	Body	chr6:43237260-43237643	Island			NA		6:43236772-43238094	Unclassified_Cell_type_specific	TRUE	6	43269903	+	TTBK1	ENSG00000112655.16	6	43076307	PTK7	1	0.0162047	-3.14591
cg05794117	-0.0105969	0.00259537	-4.08299	4.44603e-05	-0.00869289	0.00184604	-4.70895	2.49002e-06	-0.00933254	0.00150432	-6.20384	5.51032e-10	0.836367	-0.00933254	0.00150432	4.05418e-08	37	1	228394559	1	226461182	R			NA	NA	OBSCN;OBSCN	NM_052843;NM_001098623	TSS1500;TSS1500					TRUE				NA	1	228206857	-	OBSCN	ENSG00000162913.9	1	228203506	OBSCN-AS1	1	0.0165542	-1.18718
cg05794117	-0.0105969	0.00259537	-4.08299	4.44603e-05	-0.00869289	0.00184604	-4.70895	2.49002e-06	-0.00933254	0.00150432	-6.20384	5.51032e-10	0.836367	-0.00933254	0.00150432	4.05418e-08	37	1	228394559	1	226461182	R			NA	NA	OBSCN;OBSCN	NM_052843;NM_001098623	TSS1500;TSS1500					TRUE				NA	1	228206857	-	OBSCN	ENSG00000181873.13	1	228165804	IBA57	1	0.0148669	0.941439
[truncated: 2,005 more rows]
[truncated: 2 more columns]

## Sheet: Supplementary Table 19
CpG	EA.TE.fixed	EA.seTE.fixed	EA.zval.fixed	EA.pval.fixed	AA.TE.fixed	AA.seTE.fixed	AA.zval.fixed	AA.pval.fixed	all.TE.fixed	all.seTE.fixed	all.zval.fixed	all.pval.fixed	all.I2	all.Q	all.heterogeneity.p	FDR.fixed	Genome_Build	CHR	MAPINFO	Chromosome_36	Coordinate_36	Strand	Probe_SNPs	Probe_SNPs_10	Random_Loci	Methyl27_Loci	UCSC_RefGene_Name	UCSC_RefGene_Accession	UCSC_RefGene_Group	UCSC_CpG_Islands_Name	Relation_to_UCSC_CpG_Island	Phantom	DMR	Enhancer	HMM_Island	Regulatory_Feature_Name	Regulatory_Feature_Group	DHS	DNAm_Chr_hg38	DNAm_Pos_hg38	DNAm_Strand_hg38	DNAm_GeneSymbol	Tx	Tx_Chr	Tx_Start	Tx_Gene	Is_Cis	RSq	Fx
[truncated: 1,502 more rows]
[truncated: 2 more columns]

[truncated: 9 more sheets: Supplementary Table 20, Supplementary Table 21, Supplementary Table 22, Supplementary Table 23, Supplementary Table 24, Supplementary Table 25, Supplementary Table 26, Supplementary Table 27, Supplementary Table 28]
